# Supplementary material for: VIRMA-mediated m6A modification is essential for active ribosome biogenesis
Source: Research Square preprint supplement (doi:10.21203/rs.3.rs-3604242/v1), 2023-12-11
Supplement: Supplementary file 1 [file 7ee2db0c66b3653cd547a3f1.xlsx]

## Sheet: VIRMA WT-18631 peaks
peak_ID	name	chr	chromStart	chromEnd	score	strand	thickStart	thickEnd	itemRgb	blockCount	blockSizes	blockStarts	ReadsCount.input	ReadsCount.IP	log2FoldChange	pvalue	padj	OverlapGene	Symbol	Priority
13812	peak_13812	chr13	54052585	54053135	69.8902	-	54052585	54053135	0	1	550	0	0	395	11.9543	6.77449e-22	9.14009e-22	ENSMUST00000021932	Drd1	UTR3
7404	peak_7404	chr7	84577222	84577597	67.438	+	84577222	84577597	0	1	375	0	0	412	11.8081	3.76688e-21	5.00183e-21	ENSMUST00000180387	Gm2115	UTR3
10649	peak_10649	chr10	66921301	66921576	59.5099	+	66921301	66921576	0	1	275	0	0	392	10.9253	9.68377e-19	1.21822e-18	ENSMUST00000181018	Gm26576	UTR5
9301	peak_9301	chr8	111889659	111889884	53.9682	-	111889659	111889884	0	1	225	0	0	239	10.8643	4.69222e-17	5.67483e-17	ENSMUST00000034430	Chst5	UTR3
13754	peak_13754	chr13	38023021	38023296	56.7595	-	38023021	38023296	0	1	275	0	0	199	10.8429	6.64726e-18	8.19736e-18	ENSMUST00000089840	Cage1	LastExon
10777	peak_10777	chr10	81334708	81334933	55.9573	+	81334708	81334933	0	1	225	0	0	369	10.5585	1.16588e-17	1.42951e-17	ENSMUST00000220312	Tbxa2r	UTR3
16114	peak_16114	chr17	26122290	26122465	53.3063	+	26122290	26122465	0	1	175	0	0	202	10.5488	7.45207e-17	8.97882e-17	ENSMUST00000025010	Tmem8	UTR3
3533	peak_3533	chr3	109781364	109781589	52.584	-	109781364	109781589	0	1	225	0	0	167	10.4786	1.23532e-16	1.48132e-16	ENSMUST00000128219	Ntng1	UTR3
17129	peak_17129	chr18	58220725	58221025	73.7614	+	58220725	58221025	0	1	300	0	1	678	10.3942	4.51743e-23	6.24595e-23	ENSMUST00000181838	Gm26507	UTR5
17265	peak_17265	chr18	15393293	15393418	49.9694	-	15393293	15393418	0	1	125	0	0	149	10.309	7.69892e-16	9.07207e-16	ENSMUST00000079081	Aqp4	UTR3
4243	peak_4243	chr4	3870656	3870806	48.7245	-	3870656	3870806	0	1	150	0	0	152	10.3024	1.84335e-15	2.15009e-15	ENSMUST00000105158	Mos	UTR3
9047	peak_9047	chr8	45397917	45398167	49.634	-	45397917	45398167	0	1	250	0	0	142	10.2651	9.741e-16	1.14465e-15	ENSMUST00000210013	Tlr3	LastExon
8349	peak_8349	chr7	144895209	144895509	48.9402	-	144895209	144895509	0	1	300	0	0	172	10.2536	1.58476e-15	1.85149e-15	ENSMUST00000180930	Gm26793	UTR3
6177	peak_6177	chr6	36525536	36525736	49.4525	+	36525536	36525736	0	1	200	0	0	149	10.2239	1.10647e-15	1.29815e-15	ENSMUST00000172278	Chrm2	UTR3
10141	peak_10141	chr9	54026455	54026705	48.4394	-	54026455	54026705	0	1	250	0	0	136	10.2187	2.25123e-15	2.61995e-15	ENSMUST00000098760	Tnfaip8l3	UTR3
3017	peak_3017	chr3	94402881	94403131	49.7767	+	94402881	94403131	0	1	250	0	0	259	10.1903	8.81356e-16	1.03685e-15	ENSMUST00000050975	Lingo4	LastExon
6977	peak_6977	chr6	146111373	146111523	48.9197	-	146111373	146111523	0	1	150	0	0	148	10.1884	1.60802e-15	1.87808e-15	ENSMUST00000079573	Itpr2	UTR3
1572	peak_1572	chr2	109723515	109723765	50.3705	+	109723515	109723765	0	1	250	0	0	231	10.1845	5.81218e-16	6.87011e-16	ENSMUST00000111042	Bdnf	LastExon
7973	peak_7973	chr7	67219530	67219705	48.3094	-	67219530	67219705	0	1	175	0	0	138	10.1815	2.46491e-15	2.86701e-15	ENSMUST00000181631	1700112J16Rik	UTR3
7543	peak_7543	chr7	125632813	125633088	50.0199	+	125632813	125633088	0	1	275	0	0	187	10.1703	7.43192e-16	8.76022e-16	ENSMUST00000206103	Il21r	UTR3
6237	peak_6237	chr6	48752796	48752996	48.8109	+	48752796	48752996	0	1	200	0	0	223	10.1498	1.73548e-15	2.02516e-15	ENSMUST00000055558	Gimap5	LastExon
11518	peak_11518	chr11	53186508	53186708	47.8463	+	53186508	53186708	0	1	200	0	0	222	10.0554	3.41028e-15	3.95204e-15	ENSMUST00000036796	Fstl4	LastExon
15831	peak_15831	chr16	35840975	35841100	46.203	-	35840975	35841100	0	1	125	0	0	126	10.035	1.07852e-14	1.23457e-14	ENSMUST00000042665	Parp14	Exon
13657	peak_13657	chr13	102705135	102705360	46.7315	+	102705135	102705360	0	1	225	0	0	128	10.0334	7.451e-15	8.55907e-15	ENSMUST00000022124	Cd180	LastExon
18431	peak_18431	chrX	44366607	44366807	46.6431	-	44366607	44366807	0	1	200	0	0	142	10.0308	7.92747e-15	9.09966e-15	ENSMUST00000115057	Dcaf12l2	LastExon
9072	peak_9072	chr8	57776974	57777199	46.0022	-	57776974	57777199	0	1	225	0	0	126	10.0281	1.24175e-14	1.41889e-14	ENSMUST00000098757	Galntl6	UTR3
3164	peak_3164	chr3	130595450	130595600	44.5561	+	130595450	130595600	0	1	150	0	0	126	10.0233	3.41401e-14	3.86618e-14	ENSMUST00000183368	Col25a1	UTR3
11572	peak_11572	chr11	59879732	59879932	46.4493	+	59879732	59879932	0	1	200	0	0	122	10.0051	9.08137e-15	1.04082e-14	ENSMUST00000154699	Nt5m	UTR5
7075	peak_7075	chr7	18988523	18988723	46.8921	+	18988523	18988723	0	1	200	0	0	139	9.9981	6.65892e-15	7.65723e-15	ENSMUST00000063563	Nanos2	UTR3
18364	peak_18364	chrX	169302828	169303078	47.9591	+	169302828	169303078	0	1	250	0	0	177	9.99552	3.15185e-15	3.65483e-15	ENSMUST00000139146	Arhgap6	UTR3
3347	peak_3347	chr3	66973151	66973251	24.1189	-	66973151	66973251	0	1	100	0	0	170	9.88825	5.45603e-08	5.48902e-08	ENSMUST00000162060	Shox2	UTR3
296	peak_296	chr1	105827400	105827600	46.0413	+	105827400	105827600	0	1	200	0	0	198	9.85416	1.20795e-14	1.38094e-14	ENSMUST00000027559	Tnfrsf11a	Exon
18320	peak_18320	chrX	144163167	144163342	41.5021	+	144163167	144163342	0	1	175	0	0	111	9.85116	2.90144e-13	3.21078e-13	ENSMUST00000135687	A730046J19Rik	UTR3
1105	peak_1105	chr1	174836059	174836209	39.8544	-	174836059	174836209	0	1	150	0	0	116	9.83197	9.20683e-13	1.00606e-12	ENSMUST00000055294	Grem2	UTR3
6543	peak_6543	chr6	12317134	12317284	41.153	-	12317134	12317284	0	1	150	0	0	127	9.80799	3.70798e-13	4.08996e-13	ENSMUST00000137836	Thsd7a	UTR3
5147	peak_5147	chr5	104211792	104212042	45.7125	+	104211792	104212042	0	1	250	0	0	207	9.77441	1.52091e-14	1.73447e-14	ENSMUST00000066708	Dmp1	LastExon
14920	peak_14920	chr15	89484655	89484730	42.841	+	89484655	89484730	0	1	75	0	0	107	9.75903	1.13718e-13	1.26935e-13	ENSMUST00000168835	C230037L18Rik	UTR5
12999	peak_12999	chr12	105381634	105381884	44.4004	+	105381634	105381884	0	1	250	0	0	200	9.75805	3.80915e-14	4.30685e-14	ENSMUST00000180503	Tunar	UTR3
17864	peak_17864	chr19	4165048	4165223	41.9825	-	4165048	4165223	0	1	175	0	0	144	9.72803	2.07388e-13	2.30142e-13	ENSMUST00000236513	Carns1	UTR3
12231	peak_12231	chr11	53565037	53565212	40.4771	-	53565037	53565212	0	1	175	0	0	105	9.6828	5.95592e-13	6.53388e-13	ENSMUST00000153461	A430108G06Rik	UTR3
14744	peak_14744	chr15	23474239	23474414	40.2405	+	23474239	23474414	0	1	175	0	0	124	9.67437	7.0284e-13	7.69818e-13	ENSMUST00000164787	Cdh18	LastExon
9948	peak_9948	chr9	7860542	7860742	41.9147	-	7860542	7860742	0	1	200	0	0	110	9.66478	2.17466e-13	2.41225e-13	ENSMUST00000115672	Birc3	Exon
17026	peak_17026	chr18	37449806	37449981	44.047	+	37449806	37449981	0	1	175	0	0	174	9.65947	4.88204e-14	5.50222e-14	ENSMUST00000052387	Pcdhb14	LastExon
2348	peak_2348	chr2	113749138	113749313	40.514	-	113749138	113749313	0	1	175	0	0	114	9.634	5.80403e-13	6.36911e-13	ENSMUST00000099575	Grem1	UTR3
8620	peak_8620	chr8	77242738	77242888	41.4129	+	77242738	77242888	0	1	150	0	0	97	9.63338	3.08864e-13	3.41571e-13	ENSMUST00000109911	Nr3c2	UTR3
799	peak_799	chr1	89928361	89928536	25.2601	-	89928361	89928536	0	1	175	0	0	114	9.59208	2.46558e-08	2.48856e-08	ENSMUST00000187633	Gbx2	UTR3
10258	peak_10258	chr9	67758787	67758912	40.2705	-	67758787	67758912	0	1	125	0	0	95	9.58308	6.88156e-13	7.54002e-13	ENSMUST00000196844	M5C1000I18Rik	UTR3
10374	peak_10374	chr9	105162566	105162666	40.2115	-	105162566	105162666	0	1	100	0	0	98	9.56639	7.17208e-13	7.85463e-13	ENSMUST00000038648	Nek11	UTR3
9208	peak_9208	chr8	88626852	88627052	41.6373	-	88626852	88627052	0	1	200	0	0	127	9.56128	2.63997e-13	2.92369e-13	ENSMUST00000034087	Snx20	UTR3
12945	peak_12945	chr12	85708907	85709082	41.1612	+	85708907	85709082	0	1	175	0	0	102	9.56064	3.68635e-13	4.06682e-13	ENSMUST00000040536	Batf	UTR3
5052	peak_5052	chr5	63808644	63808819	40.0917	+	63808644	63808819	0	1	175	0	0	96	9.52826	7.80011e-13	8.53491e-13	ENSMUST00000159584	Nwd2	UTR3
4360	peak_4360	chr4	49770933	49771408	63.2496	-	49770933	49771408	0	1	475	0	1	386	9.51883	7.06189e-20	9.11971e-20	ENSMUST00000131797	Grin3a	UTR3
4361	peak_4361	chr4	49771433	49792569	40.0708	-	49771433	49792569	0	2	33142	0,20994	0	93	9.51386	7.91477e-13	8.65935e-13	ENSMUST00000131797	Grin3a	UTR3
10104	peak_10104	chr9	45255636	45255786	38.5758	-	45255636	45255786	0	1	150	0	0	132	9.51084	2.2548e-12	2.44083e-12	ENSMUST00000176808	Il10ra	UTR3
13495	peak_13495	chr13	43802862	43802987	38.7393	+	43802862	43802987	0	1	125	0	0	98	9.49119	2.01051e-12	2.1793e-12	ENSMUST00000015540	Cd83	UTR3
17013	peak_17013	chr18	37401479	37401529	36.5195	+	37401479	37401529	0	1	50	0	0	86	9.44677	9.49151e-12	1.01519e-11	ENSMUST00000057228	Pcdhb9	LastExon
5268	peak_5268	chr5	117392962	117393162	39.7284	+	117392962	117393162	0	1	200	0	0	96	9.4445	1.0059e-12	1.09789e-12	ENSMUST00000140833	Gm15728	UTR5
4323	peak_4323	chr4	43505827	43506002	38.6451	-	43505827	43506002	0	1	175	0	0	94	9.4295	2.14813e-12	2.32631e-12	ENSMUST00000139119	Gm12454	UTR3
14998	peak_14998	chr15	6814476	6814651	38.599	-	6814476	6814651	0	1	175	0	0	88	9.4012	2.21866e-12	2.40185e-12	ENSMUST00000022746	Osmr	UTR3
10551	peak_10551	chr10	22665114	22665189	39.1028	+	22665114	22665189	0	1	75	0	0	95	9.38803	1.55918e-12	1.69392e-12	ENSMUST00000042261	Slc2a12	Exon
2742	peak_2742	chr2	181022995	181023145	39.3559	-	181022995	181023145	0	1	150	0	0	109	9.38494	1.30563e-12	1.42128e-12	ENSMUST00000067120	Chrna4	UTR3
13659	peak_13659	chr13	102706135	102706310	38.7974	+	102706135	102706310	0	1	175	0	0	88	9.36844	1.93049e-12	2.0933e-12	ENSMUST00000022124	Cd180	LastExon
6536	peak_6536	chr6	5485150	5485325	38.9069	-	5485150	5485325	0	1	175	0	0	91	9.3646	1.78753e-12	1.94019e-12	ENSMUST00000019721	Pdk4	UTR3
8098	peak_8098	chr7	102559296	102559471	39.2487	-	102559296	102559471	0	1	175	0	0	100	9.36405	1.40758e-12	1.53101e-12	ENSMUST00000106913	Trim21	LastExon
13182	peak_13182	chr12	71015628	71015828	40.8536	-	71015628	71015828	0	1	200	0	0	165	9.33727	4.57486e-13	5.03331e-13	ENSMUST00000136690	3110056K07Rik	UTR3
18607	peak_18607	chrX	155573779	155573954	37.4091	-	155573779	155573954	0	1	175	0	0	82	9.29102	5.09789e-12	5.47933e-12	ENSMUST00000170236	Ptchd1	UTR3
3256	peak_3256	chr3	30598197	30598347	36.4173	-	30598197	30598347	0	1	150	0	0	80	9.25801	1.01935e-11	1.08972e-11	ENSMUST00000047630	Actrt3	LastExon
10345	peak_10345	chr9	98954233	98954578	37.7249	-	98954233	98954578	0	2	1174	0,171	0	92	9.2576	4.08951e-12	4.40236e-12	ENSMUST00000189148	Foxl2os	UTR3
16047	peak_16047	chr17	21434483	21434533	35.8679	+	21434483	21434533	0	1	50	0	0	95	9.24744	1.49662e-11	1.59471e-11	ENSMUST00000007884	Zfp54	LastExon
5030	peak_5030	chr5	43616456	43616531	37.3451	+	43616456	43616531	0	1	75	0	0	95	9.23807	5.33128e-12	5.72787e-12	ENSMUST00000121872	C1qtnf7	UTR3
12205	peak_12205	chr11	48866477	48866677	63.3826	-	48866477	48866677	0	1	200	0	2	659	9.22516	6.43468e-20	8.31666e-20	ENSMUST00000097271	Irgm1	LastExon
15966	peak_15966	chr16	96181444	96181569	36.8325	-	96181444	96181569	0	1	125	0	0	79	9.22236	7.62356e-12	8.17183e-12	ENSMUST00000154445	Lca5l	UTR3
13885	peak_13885	chr13	67365958	67366008	35.7118	-	67365958	67366008	0	1	50	0	0	81	9.21776	1.66958e-11	1.77697e-11	ENSMUST00000057070	Zfp456	UTR3
8097	peak_8097	chr7	102558746	102558896	37.007	-	102558746	102558896	0	1	150	0	0	79	9.21083	6.75024e-12	7.2407e-12	ENSMUST00000106913	Trim21	UTR3
16267	peak_16267	chr17	45535134	45535284	37.9599	+	45535134	45535284	0	1	150	0	0	146	9.20796	3.46803e-12	3.74047e-12	ENSMUST00000233588	Tcte1	Exon
10860	peak_10860	chr10	102388962	102389012	36.0239	+	102388962	102389012	0	1	50	0	0	80	9.19525	1.34167e-11	1.43124e-11	ENSMUST00000120748	Mgat4c	LastExon
13527	peak_13527	chr13	52646705	52646755	37.3166	+	52646705	52646755	0	1	50	0	0	98	9.18908	5.43795e-12	5.84214e-12	ENSMUST00000055087	Syk	UTR3
9693	peak_9693	chr9	72912508	72912608	36.1791	+	72912508	72912608	0	1	100	0	0	81	9.17375	1.20381e-11	1.28529e-11	ENSMUST00000055535	Prtg	UTR3
8515	peak_8515	chr8	58913254	58913429	37.8494	+	58913254	58913429	0	1	175	0	0	114	9.16697	3.74771e-12	4.03838e-12	ENSMUST00000062978	BC030500	UTR3
13888	peak_13888	chr13	67408046	67408096	36.2603	-	67408046	67408096	0	1	50	0	0	83	9.16405	1.13755e-11	1.21496e-11	ENSMUST00000056470	Zfp459	UTR3
2895	peak_2895	chr3	64089774	64089849	33.7474	+	64089774	64089849	0	1	75	0	0	73	9.1561	6.5954e-11	6.93448e-11	ENSMUST00000029406	Vmn2r1	Exon
7688	peak_7688	chr7	6676242	6676692	62.68	-	6676242	6676692	0	1	450	0	2	535	9.15392	1.05222e-19	1.3534e-19	ENSMUST00000122432	Zim1	UTR3
3781	peak_3781	chr4	53786816	53786866	35.2432	+	53786816	53786866	0	1	50	0	0	92	9.14554	2.31694e-11	2.45895e-11	ENSMUST00000030124	Tal2	UTR3
7490	peak_7490	chr7	109440017	109440142	35.1399	+	109440017	109440142	0	1	125	0	0	81	9.14434	2.49048e-11	2.64148e-11	ENSMUST00000143715	1700095J03Rik	UTR5
16472	peak_16472	chr17	23682583	23682733	35.5839	-	23682583	23682733	0	1	150	0	0	86	9.14386	1.82577e-11	1.94166e-11	ENSMUST00000085989	Cldn9	UTR3
1054	peak_1054	chr1	163702856	163703006	34.0223	-	163702856	163703006	0	1	150	0	0	83	9.14222	5.44151e-11	5.73161e-11	ENSMUST00000159679	Mettl11b	UTR3
10467	peak_10467	chr9	119972515	119972690	38.6406	-	119972515	119972690	0	1	175	0	0	148	9.12757	2.15504e-12	2.33352e-12	ENSMUST00000214058	Csrnp1	LastExon
12207	peak_12207	chr11	49016698	49016823	35.3623	-	49016698	49016823	0	1	125	0	0	76	9.12581	2.13145e-11	2.26403e-11	ENSMUST00000101295	9930111J21Rik2	UTR3
1935	peak_1935	chr2	177509432	177509482	34.2737	+	177509432	177509482	0	1	50	0	0	74	9.11414	4.56254e-11	4.81476e-11	ENSMUST00000108940	Gm14403	LastExon
7605	peak_7605	chr7	130625286	130625361	35.0408	+	130625286	130625361	0	1	75	0	0	114	9.11366	2.66974e-11	2.82919e-11	ENSMUST00000215492	Tacc2	LastExon
9045	peak_9045	chr8	41082986	41083061	35.0307	-	41082986	41083061	0	1	75	0	0	73	9.10654	2.68883e-11	2.84909e-11	ENSMUST00000145860	Mtus1	Exon
1480	peak_1480	chr2	75709547	75709647	34.5888	+	75709547	75709647	0	1	100	0	0	73	9.10325	3.66024e-11	3.87026e-11	ENSMUST00000135244	E030042O20Rik	UTR5
3079	peak_3079	chr3	103132172	103132247	34.7183	+	103132172	103132247	0	1	75	0	0	77	9.10266	3.34335e-11	3.538e-11	ENSMUST00000166143	Dennd2c	UTR5
11818	peak_11818	chr11	87732162	87732337	37.0006	+	87732162	87732337	0	1	175	0	0	109	9.09865	6.78123e-12	7.2731e-12	ENSMUST00000040089	Rnf43	Exon
5091	peak_5091	chr5	77095531	77095581	36.2045	+	77095531	77095581	0	1	50	0	0	95	9.08802	1.18258e-11	1.26283e-11	ENSMUST00000148568	Hopxos	UTR5
4362	peak_4362	chr4	49844719	49844919	38.2388	-	49844719	49844919	0	1	200	0	0	259	9.0796	2.85491e-12	3.08293e-12	ENSMUST00000131797	Grin3a	UTR3
9016	peak_9016	chr8	27138847	27139022	35.3047	-	27138847	27139022	0	1	175	0	0	73	9.07224	2.21892e-11	2.35626e-11	ENSMUST00000054212	Rab11fip1	UTR3
10658	peak_10658	chr10	68779877	68780127	56.4191	+	68779877	68780127	0	1	250	0	1	290	9.05235	8.43869e-18	1.0379e-17	ENSMUST00000080995	Tmem26	UTR3
17069	peak_17069	chr18	37658206	37658256	33.8631	+	37658206	37658256	0	1	50	0	0	81	9.05036	6.0822e-11	6.39995e-11	ENSMUST00000097608	3222401L13Rik	UTR5
17182	peak_17182	chr18	68338924	68338999	34.2212	+	68338924	68338999	0	1	75	0	0	83	9.0433	4.73456e-11	4.99347e-11	ENSMUST00000172148	Mc5r	LastExon
15343	peak_15343	chr15	98288462	98288562	37.7033	-	98288462	98288562	0	1	100	0	0	144	9.04301	4.15192e-12	4.46851e-12	ENSMUST00000023722	Zfp641	UTR3
2027	peak_2027	chr2	25194365	25194465	36.0822	-	25194365	25194465	0	1	100	0	0	100	9.042	1.28809e-11	1.37464e-11	ENSMUST00000081869	Tor4a	UTR3
6942	peak_6942	chr6	129428533	129428583	34.4817	-	129428533	129428583	0	1	50	0	0	71	9.0362	3.94463e-11	4.16836e-11	ENSMUST00000037481	Clec1a	UTR3
5023	peak_5023	chr5	38038941	38039066	35.7581	+	38038941	38039066	0	1	125	0	0	90	9.02011	1.61621e-11	1.72086e-11	ENSMUST00000114126	Stx18	UTR5
5148	peak_5148	chr5	104212992	104213042	33.5293	+	104212992	104213042	0	1	50	0	0	69	9.01454	7.68019e-11	8.06638e-11	ENSMUST00000066708	Dmp1	UTR3
14425	peak_14425	chr14	19564425	19564475	33.9414	-	19564425	19564475	0	1	50	0	0	69	9.01336	5.75784e-11	6.06207e-11	ENSMUST00000170694	Gm2237	UTR3
13884	peak_13884	chr13	67363633	67363758	34.6164	-	67363633	67363758	0	1	125	0	0	73	9.00725	3.58949e-11	3.79675e-11	ENSMUST00000057070	Zfp456	UTR3
9922	peak_9922	chr9	121909155	121909330	34.0855	+	121909155	121909330	0	1	175	0	0	106	8.98225	5.20746e-11	5.48601e-11	ENSMUST00000050327	Ackr2	LastExon
787	peak_787	chr1	85940736	85940786	32.6823	-	85940736	85940786	0	1	50	0	0	71	8.98118	1.38812e-10	1.45097e-10	ENSMUST00000086975	Gpr55	UTR3
16315	peak_16315	chr17	52978187	52978437	55.9586	+	52978187	52978437	0	1	250	0	1	289	8.9777	1.16465e-17	1.4282e-17	ENSMUST00000184279	Kcnh8	UTR5
7969	peak_7969	chr7	66259214	66259289	34.132	-	66259214	66259289	0	1	75	0	0	71	8.97228	5.03968e-11	5.31196e-11	ENSMUST00000145954	Lrrk1	UTR3
2338	peak_2338	chr2	105536204	105536279	33.2608	-	105536204	105536279	0	1	75	0	0	70	8.97008	9.26892e-11	9.71639e-11	ENSMUST00000149133	Pax6os1	UTR3
3780	peak_3780	chr4	53786741	53786791	32.8322	+	53786741	53786791	0	1	50	0	0	75	8.94647	1.2501e-10	1.30773e-10	ENSMUST00000030124	Tal2	UTR3
6297	peak_6297	chr6	82092619	82092694	34.1807	+	82092619	82092694	0	1	75	0	0	75	8.9451	4.87069e-11	5.13559e-11	ENSMUST00000042974	Eva1a	UTR3
102	peak_102	chr1	43029609	43029709	33.4951	+	43029609	43029709	0	1	100	0	0	68	8.94009	7.86752e-11	8.25987e-11	ENSMUST00000179655	Gpr45	UTR5
6371	peak_6371	chr6	100707081	100707206	33.1013	+	100707081	100707206	0	1	125	0	0	70	8.94006	1.0361e-10	1.0852e-10	ENSMUST00000141333	Gxylt2	UTR5
5552	peak_5552	chr5	6769604	6769829	53.6446	-	6769604	6769829	0	1	225	0	1	253	8.92494	5.88042e-17	7.10171e-17	ENSMUST00000164784	Zfp804b	LastExon
13703	peak_13703	chr13	12472833	12472983	34.9665	-	12472833	12472983	0	1	150	0	0	94	8.90812	2.81163e-11	2.9787e-11	ENSMUST00000179308	Edaradd	UTR3
16829	peak_16829	chr17	84955091	84955141	32.8674	-	84955091	84955141	0	1	50	0	0	70	8.90566	1.21962e-10	1.2762e-10	ENSMUST00000181147	1110020A21Rik	UTR3
10316	peak_10316	chr9	89590562	89590862	51.7851	-	89590562	89590862	0	1	300	0	1	249	8.89123	2.16102e-16	2.5771e-16	ENSMUST00000044491	Minar1	UTR3
18317	peak_18317	chrX	143099918	143100093	33.1389	+	143099918	143100093	0	1	175	0	0	82	8.88321	1.00914e-10	1.05726e-10	ENSMUST00000165829	Rtl9	Exon
12660	peak_12660	chr11	116224083	116225124	35.4909	-	116224083	116225124	0	2	118,57	0,984	0	132	8.88265	1.94861e-11	2.071e-11	ENSMUST00000037007	Evpl	LastExon
6178	peak_6178	chr6	36525761	36525861	33.7349	+	36525761	36525861	0	1	100	0	0	74	8.88254	6.6545e-11	6.99503e-11	ENSMUST00000172278	Chrm2	UTR3
1769	peak_1769	chr2	150003329	150003454	31.4523	+	150003329	150003454	0	1	125	0	0	69	8.86564	3.27756e-10	3.40342e-10	ENSMUST00000109934	Syndig1	LastExon
14317	peak_14317	chr14	66637577	66637727	35.3293	+	66637577	66637727	0	1	150	0	0	110	8.86401	2.18128e-11	2.31643e-11	ENSMUST00000161339	Adra1a	UTR5
17464	peak_17464	chr18	77729680	77729805	31.5178	-	77729680	77729805	0	1	125	0	0	72	8.85784	3.13081e-10	3.2523e-10	ENSMUST00000180530	A330094K24Rik	UTR3
11613	peak_11613	chr11	62265433	62265508	31.957	+	62265433	62265508	0	1	75	0	0	99	8.85716	2.30436e-10	2.39873e-10	ENSMUST00000018644	Adora2b	LastExon
5825	peak_5825	chr5	113793728	113793853	34.1132	-	113793728	113793853	0	1	125	0	0	97	8.84695	5.107e-11	5.3814e-11	ENSMUST00000067853	Tmem119	UTR3
3650	peak_3650	chr4	11126805	11126880	33.5593	+	11126805	11126880	0	1	75	0	0	97	8.84397	7.52045e-11	7.9004e-11	ENSMUST00000142297	Gm11827	UTR5
17016	peak_17016	chr18	37401829	37401904	30.9574	+	37401829	37401904	0	1	75	0	0	69	8.83094	4.62971e-10	4.796e-10	ENSMUST00000057228	Pcdhb9	LastExon
16884	peak_16884	chr18	11945280	11945330	32.2556	+	11945280	11945330	0	1	50	0	0	73	8.83058	1.87036e-10	1.95034e-10	ENSMUST00000046948	Cables1	UTR3
14696	peak_14696	chr14	110749777	110749902	32.0279	-	110749777	110749902	0	1	125	0	0	62	8.82021	2.19317e-10	2.28376e-10	ENSMUST00000078386	Slitrk6	LastExon
5775	peak_5775	chr5	105216898	105217048	32.6877	-	105216898	105217048	0	1	150	0	0	64	8.81926	1.38285e-10	1.44554e-10	ENSMUST00000065588	Gbp10	UTR3
16992	peak_16992	chr18	37296939	37297114	34.3102	+	37296939	37297114	0	1	175	0	0	127	8.81156	4.44709e-11	4.69452e-11	ENSMUST00000056522	Pcdhb2	LastExon
13687	peak_13687	chr13	117975652	117975727	34.0945	+	117975652	117975727	0	1	75	0	0	127	8.80338	5.1746e-11	5.45171e-11	ENSMUST00000006991	Hcn1	LastExon
9893	peak_9893	chr9	118897812	118898137	103.854	+	118897812	118898137	0	1	325	0	4	758	8.79963	3.32562e-32	5.45659e-32	ENSMUST00000044165	Itga9	UTR3
15959	peak_15959	chr16	94832805	94832880	29.8679	-	94832805	94832880	0	1	75	0	0	69	8.79163	9.9188e-10	1.02064e-09	ENSMUST00000232128	Kcnj6	UTR3
17374	peak_17374	chr18	46560329	46560454	32.421	-	46560329	46560454	0	1	125	0	0	70	8.78451	1.66639e-10	1.73901e-10	ENSMUST00000036030	Tmed7	UTR3
14992	peak_14992	chr15	4026018	4026118	29.1364	-	4026018	4026118	0	1	100	0	0	62	8.76964	1.65253e-09	1.69455e-09	ENSMUST00000149906	BC037032	UTR3
18478	peak_18478	chrX	86746619	86746794	29.5088	-	86746619	86746794	0	1	175	0	0	78	8.76067	1.27461e-09	1.30904e-09	ENSMUST00000113966	Il1rapl1	UTR3
11551	peak_11551	chr11	58207094	58207144	31.9289	+	58207094	58207144	0	1	50	0	0	81	8.75489	2.35017e-10	2.44601e-10	ENSMUST00000168280	Igtp	UTR3
3965	peak_3965	chr4	119259350	119259525	30.4551	+	119259350	119259525	0	1	175	0	0	92	8.74742	6.57973e-10	6.79378e-10	ENSMUST00000094823	Cldn19	UTR3
11237	peak_11237	chr10	81746132	81746257	31.7671	-	81746132	81746257	0	1	125	0	0	60	8.7441	2.6311e-10	2.73626e-10	ENSMUST00000105316	Gm3055	LastExon
3436	peak_3436	chr3	94393245	94402848	33.0505	-	94393245	94402848	0	2	40,79	0,9524	0	106	8.74273	1.07344e-10	1.12412e-10	ENSMUST00000198829	Gm43401	UTR3
13237	peak_13237	chr12	81560833	81560908	30.428	-	81560833	81560908	0	1	75	0	0	69	8.74173	6.70622e-10	6.92247e-10	ENSMUST00000008582	Adam21	LastExon
14092	peak_14092	chr14	18033683	18033733	29.6445	+	18033683	18033733	0	1	50	0	0	63	8.73789	1.15931e-09	1.19154e-09	ENSMUST00000022304	Thrb	UTR3
17015	peak_17015	chr18	37401704	37401754	33.208	+	37401704	37401754	0	1	50	0	0	92	8.73382	9.61647e-11	1.00784e-10	ENSMUST00000057228	Pcdhb9	LastExon
10379	peak_10379	chr9	106647714	106647814	33.4671	-	106647714	106647814	0	1	100	0	0	141	8.72987	8.02277e-11	8.42144e-11	ENSMUST00000023959	Grm2	Exon
18385	peak_18385	chrX	10717051	10717126	32.1715	-	10717051	10717126	0	1	75	0	0	81	8.728	1.98362e-10	2.0674e-10	ENSMUST00000180511	Gm10489	UTR3
955	peak_955	chr1	136845133	136845258	32.5463	-	136845133	136845258	0	1	125	0	0	79	8.70236	1.52616e-10	1.59436e-10	ENSMUST00000168126	Nr5a2	UTR3
13658	peak_13658	chr13	102705385	102705460	30.1115	+	102705385	102705460	0	1	75	0	0	61	8.69206	8.36674e-10	8.62077e-10	ENSMUST00000022124	Cd180	LastExon
17674	peak_17674	chr19	24678124	24678174	29.5831	+	24678124	24678174	0	1	50	0	0	64	8.6845	1.21017e-09	1.24341e-09	ENSMUST00000057243	Tmem252	UTR3
1479	peak_1479	chr2	75705119	75705294	33.7356	+	75705119	75705294	0	1	175	0	0	147	8.68346	6.65028e-11	6.99138e-11	ENSMUST00000135244	E030042O20Rik	UTR5
9590	peak_9590	chr9	55545987	55546062	28.1844	+	55545987	55546062	0	1	75	0	0	60	8.68072	3.21289e-09	3.27835e-09	ENSMUST00000114290	Isl2	UTR3
715	peak_715	chr1	64735234	64735409	33.4406	-	64735234	64735409	0	1	175	0	0	118	8.68027	8.17277e-11	8.57793e-11	ENSMUST00000116133	Fzd5	LastExon
74	peak_74	chr1	36319354	36319404	32.7295	+	36319354	36319404	0	1	50	0	0	123	8.67755	1.34302e-10	1.40422e-10	ENSMUST00000116629	Arid5a	UTR3
6991	peak_6991	chr7	3693449	3693549	31.3879	+	3693449	3693549	0	1	100	0	0	75	8.66788	3.42807e-10	3.55873e-10	ENSMUST00000108630	Tsen34	UTR5
9555	peak_9555	chr9	45955425	45955475	30.1854	+	45955425	45955475	0	1	50	0	0	73	8.66624	7.94531e-10	8.19016e-10	ENSMUST00000216147	A830035O19Rik	UTR5
10067	peak_10067	chr9	42520634	42520684	31.8037	-	42520634	42520684	0	1	50	0	0	102	8.66525	2.56474e-10	2.66769e-10	ENSMUST00000034515	Grik4	UTR3
2796	peak_2796	chr3	27335697	27335772	28.8082	+	27335697	27335772	0	1	75	0	0	60	8.66313	2.07767e-09	2.12745e-09	ENSMUST00000046383	Tnfsf10	UTR3
8409	peak_8409	chr8	18932988	18933088	30.742	+	18932988	18933088	0	1	100	0	0	72	8.65795	5.38268e-10	5.56828e-10	ENSMUST00000152974	Xkr5	UTR3
8666	peak_8666	chr8	86746473	86746523	31.1886	+	86746473	86746523	0	1	50	0	0	64	8.64673	3.93914e-10	4.08608e-10	ENSMUST00000098532	Gm10638	LastExon
14003	peak_14003	chr13	97744889	97745014	31.5632	-	97744889	97745014	0	1	125	0	0	71	8.64494	3.03327e-10	3.15151e-10	ENSMUST00000123535	5330416C01Rik	UTR3
2226	peak_2226	chr2	66484004	66484129	31.1493	-	66484004	66484129	0	1	125	0	0	64	8.64278	4.04836e-10	4.19868e-10	ENSMUST00000112354	Scn9a	LastExon
13110	peak_13110	chr12	28594572	28594722	32.2193	-	28594572	28594722	0	1	150	0	0	88	8.64153	1.91842e-10	2e-10	ENSMUST00000220655	Colec11	UTR3
7629	peak_7629	chr7	139875352	139875502	32.7052	+	139875352	139875502	0	1	150	0	0	143	8.63621	1.36597e-10	1.42805e-10	ENSMUST00000026548	Adgra1	LastExon
16640	peak_16640	chr17	35379320	35379395	30.4927	-	35379320	35379395	0	1	75	0	0	76	8.62765	6.40874e-10	6.61869e-10	ENSMUST00000113886	Gm11131	UTR3
2623	peak_2623	chr2	161529314	161529439	31.7126	-	161529314	161529439	0	1	125	0	0	104	8.62598	2.73306e-10	2.84165e-10	ENSMUST00000109441	Ptprt	UTR3
6975	peak_6975	chr6	146108498	146108623	30.5566	-	146108498	146108623	0	1	125	0	0	63	8.60277	6.129e-10	6.33224e-10	ENSMUST00000079573	Itpr2	UTR3
3583	peak_3583	chr3	129788665	129788815	30.4355	-	129788665	129788815	0	1	150	0	0	72	8.59642	6.67065e-10	6.88651e-10	ENSMUST00000179187	Lrit3	LastExon
3617	peak_3617	chr3	151835640	151835790	30.1798	-	151835640	151835790	0	1	150	0	0	60	8.59125	7.97677e-10	8.22214e-10	ENSMUST00000106126	Ptgfr	Exon
9836	peak_9836	chr9	108986587	108986712	29.5955	+	108986587	108986712	0	1	125	0	0	57	8.58907	1.19964e-09	1.23272e-09	ENSMUST00000052724	Ucn2	UTR3
2417	peak_2417	chr2	122733439	122733514	29.1454	-	122733439	122733514	0	1	75	0	0	62	8.58867	1.64209e-09	1.68412e-09	ENSMUST00000150154	Bloc1s6os	UTR3
4918	peak_4918	chr5	27852510	27852610	29.8122	+	27852510	27852610	0	1	100	0	0	64	8.58265	1.03145e-09	1.06084e-09	ENSMUST00000036227	Htr5a	UTR3
8525	peak_8525	chr8	66704281	66704381	29.814	+	66704281	66704381	0	1	100	0	0	60	8.5759	1.03006e-09	1.05946e-09	ENSMUST00000039303	Npy1r	Exon
8330	peak_8330	chr7	142491648	142491698	29.1396	-	142491648	142491698	0	1	50	0	0	65	8.57589	1.64888e-09	1.6909e-09	ENSMUST00000054910	Prr33	UTR3
1902	peak_1902	chr2	167542418	167542518	32.2001	+	167542418	167542518	0	1	100	0	0	105	8.57194	1.94424e-10	2.0267e-10	ENSMUST00000052631	Snai1	UTR3
9816	peak_9816	chr9	108055458	108055558	27.4185	+	108055458	108055558	0	1	100	0	0	94	8.56723	5.47841e-09	5.57445e-09	ENSMUST00000085060	Amigo3	UTR3
5051	peak_5051	chr5	63807069	63807219	27.9143	+	63807069	63807219	0	1	150	0	0	59	8.56524	3.87825e-09	3.95337e-09	ENSMUST00000159584	Nwd2	LastExon
12570	peak_12570	chr11	102819647	102819697	30.605	-	102819647	102819697	0	1	50	0	0	83	8.55613	5.92434e-10	6.12317e-10	ENSMUST00000092567	Gjc1	UTR5
12547	peak_12547	chr11	101424900	101424950	28.9007	-	101424900	101424950	0	1	50	0	0	57	8.54756	1.94761e-09	1.99538e-09	ENSMUST00000103102	Ptges3l	UTR5
15010	peak_15010	chr15	11035216	11035366	29.9552	-	11035216	11035366	0	1	150	0	0	82	8.54743	9.33072e-10	9.60711e-10	ENSMUST00000058007	Rxfp3	UTR3
7513	peak_7513	chr7	118623443	118623518	28.3492	+	118623443	118623518	0	1	75	0	0	60	8.54	2.86291e-09	2.92444e-09	ENSMUST00000121744	Tmc5	Exon
7509	peak_7509	chr7	112957336	112957386	29.2281	+	112957336	112957386	0	1	50	0	0	54	8.53259	1.55004e-09	1.59024e-09	ENSMUST00000182858	Rassf10	UTR3
6234	peak_6234	chr6	48678515	48678615	29.1168	+	48678515	48678615	0	1	100	0	0	56	8.5256	1.67552e-09	1.71784e-09	ENSMUST00000054050	Gimap9	UTR3
12941	peak_12941	chr12	85290756	85290806	30.1949	+	85290756	85290806	0	1	50	0	0	89	8.52424	7.89242e-10	8.13655e-10	ENSMUST00000059341	Zc2hc1c	Exon
10143	peak_10143	chr9	54027130	54027230	26.3807	-	54027130	54027230	0	1	100	0	0	56	8.51289	1.13013e-08	1.1445e-08	ENSMUST00000098760	Tnfaip8l3	LastExon
10590	peak_10590	chr10	42957955	42958005	29.7606	+	42957955	42958005	0	1	50	0	0	61	8.51134	1.06933e-09	1.09942e-09	ENSMUST00000105494	Scml4	UTR3
13832	peak_13832	chr13	56887463	56887513	31.3421	-	56887463	56887513	0	1	50	0	0	94	8.50813	3.53959e-10	3.67368e-10	ENSMUST00000173817	Trpc7	Exon
7507	peak_7507	chr7	112954111	112954236	32.5316	+	112954111	112954236	0	1	125	0	0	125	8.50627	1.54199e-10	1.61072e-10	ENSMUST00000182858	Rassf10	UTR5
10964	peak_10964	chr10	12941357	12941457	31.1761	-	12941357	12941457	0	1	100	0	0	118	8.50566	3.97364e-10	4.12164e-10	ENSMUST00000163425	Stx11	LastExon
189	peak_189	chr1	74369019	74369119	28.6756	+	74369019	74369119	0	1	100	0	0	62	8.50197	2.27943e-09	2.33225e-09	ENSMUST00000191010	Catip	LastExon
14401	peak_14401	chr14	119869131	119869581	52.8047	+	119869131	119869581	0	1	450	0	2	455	8.48871	1.05851e-16	1.27118e-16	ENSMUST00000065904	Hs6st3	LastExon
3839	peak_3839	chr4	66841534	66841784	48.5266	+	66841534	66841784	0	1	250	0	1	190	8.48022	2.11762e-15	2.46629e-15	ENSMUST00000048096	Tlr4	UTR3
1282	peak_1282	chr2	26910763	26910863	32.3166	+	26910763	26910863	0	1	100	0	0	139	8.46936	1.79241e-10	1.86958e-10	ENSMUST00000102898	Rpl7a	UTR5
272	peak_272	chr1	92983768	92983918	28.5875	+	92983768	92983918	0	1	150	0	0	65	8.46728	2.42441e-09	2.4791e-09	ENSMUST00000169198	Gpr35	UTR3
9361	peak_9361	chr8	122578612	122578687	28.6888	-	122578612	122578687	0	1	75	0	0	75	8.46361	2.25822e-09	2.31106e-09	ENSMUST00000212319	Galns	UTR3
14688	peak_14688	chr14	104465339	104465858	52.8931	-	104465339	104465858	0	2	26174	0,345	2	451	8.4593	9.94687e-17	1.19561e-16	ENSMUST00000053016	Pou4f1	UTR3
18252	peak_18252	chrX	101519684	101519809	29.1221	+	101519684	101519809	0	1	125	0	0	90	8.4467	1.66918e-09	1.71143e-09	ENSMUST00000120403	Gm6184	UTR5
4013	peak_4013	chr4	126091991	126092091	28.2872	+	126091991	126092091	0	1	100	0	0	54	8.44548	2.99027e-09	3.05286e-09	ENSMUST00000035497	Oscp1	UTR3
15875	peak_15875	chr16	52453628	52453753	27.8856	-	52453628	52453753	0	1	125	0	0	56	8.44121	3.95639e-09	4.0328e-09	ENSMUST00000023312	Alcam	UTR5
5070	peak_5070	chr5	66174483	66174808	49.7653	+	66174483	66174808	0	1	325	0	2	337	8.44001	8.88389e-16	1.04505e-15	ENSMUST00000180652	Gm26725	UTR5
8101	peak_8101	chr7	104300218	104300268	27.9519	-	104300218	104300268	0	1	50	0	0	62	8.43804	3.77784e-09	3.85164e-09	ENSMUST00000106839	Trim12a	UTR3
18631	peak_18631	chrX	167478779	167478979	48.2088	-	167478779	167478979	0	1	200	0	1	213	8.43557	2.64573e-15	3.07406e-15	ENSMUST00000112145	Frmpd4	Exon
1682	peak_1682	chr2	126035804	126036054	48.6018	+	126035804	126036054	0	1	250	0	1	205	8.42998	2.00928e-15	2.341e-15	ENSMUST00000138576	Fgf7	UTR5
8431	peak_8431	chr8	24060718	24060793	26.6337	+	24060718	24060793	0	1	75	0	0	52	8.42798	9.47301e-09	9.60395e-09	ENSMUST00000207301	Zmat4	UTR3
15451	peak_15451	chr16	17139824	17139899	26.2277	+	17139824	17139899	0	1	75	0	0	51	8.42411	1.25728e-08	1.27258e-08	ENSMUST00000023452	Ccdc116	UTR3
18606	peak_18606	chrX	154971231	154971281	29.194	-	154971231	154971281	0	1	50	0	0	65	8.42035	1.58733e-09	1.62832e-09	ENSMUST00000118505	Gm6645	UTR3
5076	peak_5076	chr5	73012370	73012420	25.7382	+	73012370	73012420	0	1	50	0	0	58	8.41986	1.76776e-08	1.78655e-08	ENSMUST00000201304	Slc10a4	UTR3
2731	peak_2731	chr2	180100064	180100164	30.4832	-	180100064	180100164	0	1	100	0	0	88	8.41921	6.45211e-10	6.66275e-10	ENSMUST00000056480	Hrh3	UTR3
2797	peak_2797	chr3	28131675	28131725	27.3632	+	28131675	28131725	0	1	50	0	0	52	8.39959	5.69399e-09	5.79255e-09	ENSMUST00000148827	Pld1	LastExon
13425	peak_13425	chr13	22031243	22031343	27.496	+	22031243	22031343	0	1	100	0	0	51	8.3892	5.18976e-09	5.28305e-09	ENSMUST00000146121	Gm11292	UTR5
551	peak_551	chr1	192506063	192506113	28.3087	+	192506063	192506113	0	1	50	0	0	55	8.3885	2.94577e-09	3.00776e-09	ENSMUST00000151152	Kcnh1	UTR3
5945	peak_5945	chr5	128583490	128583590	27.1107	-	128583490	128583590	0	1	100	0	0	54	8.38832	6.79193e-09	6.90007e-09	ENSMUST00000134673	5930412G12Rik	UTR3
17310	peak_17310	chr18	35624768	35624818	27.7014	-	35624768	35624818	0	1	50	0	0	97	8.37563	4.49755e-09	4.58191e-09	ENSMUST00000237305	Slc23a1	UTR3
17579	peak_17579	chr19	8679100	8679150	28.2904	+	8679100	8679150	0	1	50	0	0	73	8.3727	2.9835e-09	3.04612e-09	ENSMUST00000163785	Chrm1	LastExon
17024	peak_17024	chr18	37448506	37448556	26.8712	+	37448506	37448556	0	1	50	0	0	60	8.36906	8.02539e-09	8.14651e-09	ENSMUST00000052387	Pcdhb14	LastExon
5674	peak_5674	chr5	43979514	43979614	26.9936	-	43979514	43979614	0	1	100	0	0	54	8.36587	7.36883e-09	7.48371e-09	ENSMUST00000199481	Fgfbp1	LastExon
10066	peak_10066	chr9	42520559	42520609	28.9126	-	42520559	42520609	0	1	50	0	0	88	8.35942	1.93149e-09	1.97897e-09	ENSMUST00000034515	Grik4	UTR3
8857	peak_8857	chr8	121087029	121087104	27.6089	+	121087029	121087104	0	1	75	0	0	55	8.34825	4.79708e-09	4.88545e-09	ENSMUST00000181504	Foxf1	UTR3
7550	peak_7550	chr7	126449098	126449148	28.4615	+	126449098	126449148	0	1	50	0	0	60	8.34782	2.64749e-09	2.70543e-09	ENSMUST00000133300	Rabep2	UTR5
1065	peak_1065	chr1	166099252	166099352	27.721	-	166099252	166099352	0	1	100	0	0	59	8.34339	4.4366e-09	4.52005e-09	ENSMUST00000085992	Dusp27	LastExon
6443	peak_6443	chr6	121365623	121365673	27.316	+	121365623	121365673	0	1	50	0	0	51	8.34221	5.88402e-09	5.98521e-09	ENSMUST00000032200	Slc6a12	UTR3
17191	peak_17191	chr18	74771077	74771127	27.4303	+	74771077	74771127	0	1	50	0	0	56	8.33824	5.43329e-09	5.52915e-09	ENSMUST00000074157	Myo5b	UTR3
4672	peak_4672	chr4	134746384	134746434	30.6679	-	134746384	134746434	0	1	50	0	0	105	8.33603	5.66986e-10	5.86211e-10	ENSMUST00000037828	Ldlrap1	UTR3
3371	peak_3371	chr3	82539982	82540282	50.9983	-	82539982	82540282	0	1	300	0	2	310	8.32468	3.74491e-16	4.44602e-16	ENSMUST00000182831	Npy2r	UTR3
4888	peak_4888	chr5	21373066	21373116	27.8002	+	21373066	21373116	0	1	50	0	0	79	8.31424	4.19861e-09	4.27877e-09	ENSMUST00000035799	Fgl2	Exon
3016	peak_3016	chr3	94402206	94402256	27.7919	+	94402206	94402256	0	1	50	0	0	67	8.31108	4.22297e-09	4.30335e-09	ENSMUST00000050975	Lingo4	LastExon
13811	peak_13811	chr13	53468026	53468376	68.6043	-	53468026	53468376	0	1	350	0	3	510	8.31101	1.66555e-21	2.22875e-21	ENSMUST00000021922	Msx2	UTR3
15213	peak_15213	chr15	79484217	79484367	30.2679	-	79484217	79484367	0	1	150	0	0	108	8.30829	7.4983e-10	7.73495e-10	ENSMUST00000057801	Kcnj4	UTR3
5946	peak_5946	chr5	128583715	128583790	26.7519	-	128583715	128583790	0	1	75	0	0	48	8.29684	8.72186e-09	8.84867e-09	ENSMUST00000134673	5930412G12Rik	UTR3
2370	peak_2370	chr2	119269950	119270200	44.2906	-	119269950	119270200	0	1	250	0	1	329	8.29077	4.11438e-14	4.64717e-14	ENSMUST00000037360	Rhov	UTR3
4134	peak_4134	chr4	141384042	141384092	28.4419	+	141384042	141384092	0	1	50	0	0	90	8.28354	2.68409e-09	2.74238e-09	ENSMUST00000006380	Fam131c	UTR3
5942	peak_5942	chr5	127784140	127784190	27.5908	-	127784140	127784190	0	1	50	0	0	58	8.27775	4.85806e-09	4.94701e-09	ENSMUST00000044441	Tmem132d	LastExon
5571	peak_5571	chr5	23831707	23831782	26.4808	-	23831707	23831782	0	1	75	0	0	51	8.27326	1.05389e-08	1.06781e-08	ENSMUST00000122963	4933427G23Rik	UTR3
5623	peak_5623	chr5	34129215	34129265	27.0581	-	34129215	34129265	0	1	50	0	0	51	8.271	7.04526e-09	7.15666e-09	ENSMUST00000202409	Poln	Exon
3531	peak_3531	chr3	108937894	108937944	26.7054	-	108937894	108937944	0	1	50	0	0	49	8.26539	9.01084e-09	9.13837e-09	NA	NA	NA
15888	peak_15888	chr16	59558862	59558912	24.4839	-	59558862	59558912	0	1	50	0	0	53	8.26187	4.23314e-08	4.26196e-08	ENSMUST00000172910	Crybg3	Exon
17312	peak_17312	chr18	35652766	35652841	30.0449	-	35652766	35652841	0	1	75	0	0	135	8.26079	8.76372e-10	9.0278e-10	ENSMUST00000097619	Prob1	LastExon
16170	peak_16170	chr17	31295582	31295632	28.1426	+	31295582	31295632	0	1	50	0	0	77	8.24339	3.30763e-09	3.37465e-09	ENSMUST00000236752	AC154652.2	UTR3
18480	peak_18480	chrX	86747394	86747719	48.9341	-	86747394	86747719	0	1	325	0	2	304	8.22292	1.59156e-15	1.85932e-15	ENSMUST00000078875	Il1rapl1	LastExon
10718	peak_10718	chr10	78078719	78078894	43.6552	+	78078719	78078894	0	1	175	0	1	176	8.2221	6.42365e-14	7.21914e-14	ENSMUST00000105393	Icosl	UTR3
7928	peak_7928	chr7	45817035	45817385	46.5215	-	45817035	45817385	0	1	350	0	2	292	8.20826	8.63202e-15	9.89986e-15	ENSMUST00000071937	Kcnj14	UTR3
4960	peak_4960	chr5	31487535	31487585	24.1363	+	31487535	31487585	0	1	50	0	0	46	8.19836	5.39005e-08	5.42324e-08	ENSMUST00000201177	4930566F21Rik	UTR3
5312	peak_5312	chr5	123117572	123117622	27.6333	+	123117572	123117622	0	1	50	0	0	72	8.19205	4.71612e-09	4.80352e-09	ENSMUST00000186469	Rhof	UTR3
9496	peak_9496	chr9	30961900	30962100	49.843	+	30961900	30962100	0	1	200	0	2	457	8.18327	8.41125e-16	9.90268e-16	ENSMUST00000163037	Adamts8	UTR3
16553	peak_16553	chr17	28638232	28638432	45.3268	-	28638232	28638432	0	1	200	0	1	218	8.17848	1.99274e-14	2.26604e-14	ENSMUST00000233249	Slc26a8	LastExon
2349	peak_2349	chr2	113749863	113749963	29.3754	-	113749863	113749963	0	1	100	0	0	104	8.17747	1.39919e-09	1.43587e-09	ENSMUST00000099575	Grem1	LastExon
2412	peak_2412	chr2	122107722	122107872	45.111	-	122107722	122107872	0	1	150	0	1	175	8.17737	2.31692e-14	2.63178e-14	ENSMUST00000135847	Spg11	UTR3
7689	peak_7689	chr7	6676767	6677017	106	-	6676767	6677017	0	1	250	0	5	647	8.17411	7.42036e-33	1.23249e-32	ENSMUST00000122432	Zim1	UTR3
6396	peak_6396	chr6	115676744	115676844	28.9776	+	115676744	115676844	0	1	100	0	0	135	8.17306	1.84624e-09	1.89183e-09	ENSMUST00000203121	D830050J10Rik	UTR5
17410	peak_17410	chr18	61494718	61494768	27.1791	-	61494718	61494768	0	1	50	0	0	59	8.17298	6.47457e-09	6.58089e-09	ENSMUST00000171629	Arhgef37	UTR3
13119	peak_13119	chr12	32204013	32204113	26.1009	-	32204013	32204113	0	1	100	0	0	49	8.1642	1.37355e-08	1.38951e-08	ENSMUST00000217915	Pik3cg	Exon
12974	peak_12974	chr12	99965324	99965424	28.3266	+	99965324	99965424	0	1	100	0	0	79	8.16367	2.90886e-09	2.97051e-09	ENSMUST00000049788	Kcnk13	UTR5
18133	peak_18133	chrX	20097090	20097265	44.1457	+	20097090	20097265	0	1	175	0	1	158	8.16088	4.55526e-14	5.13828e-14	ENSMUST00000044138	Chst7	UTR3
12020	peak_12020	chr11	118118071	118118121	26.6046	+	118118071	118118121	0	1	50	0	0	50	8.16065	9.6678e-09	9.79983e-09	ENSMUST00000134069	Gm11738	UTR5
2131	peak_2131	chr2	31638169	31638344	44.0769	-	31638169	31638344	0	1	175	0	1	235	8.16021	4.78092e-14	5.38923e-14	ENSMUST00000145389	Gm13425	UTR3
5202	peak_5202	chr5	110620735	110620985	43.6231	+	110620735	110620985	0	1	250	0	1	252	8.14585	6.56954e-14	7.38133e-14	ENSMUST00000165856	Galnt9	UTR3
9580	peak_9580	chr9	53373995	53374045	24.9338	+	53373995	53374045	0	1	50	0	0	44	8.12998	3.0958e-08	3.12025e-08	ENSMUST00000051014	Exph5	LastExon
11510	peak_11510	chr11	50857259	50859290	26.9847	+	50857259	50859290	0	2	141,34	0,1997	0	79	8.12936	7.41464e-09	7.52982e-09	ENSMUST00000126890	Grm6	UTR5
9569	peak_9569	chr9	50775293	50775368	28.1838	+	50775293	50775368	0	1	75	0	0	104	8.12926	3.21442e-09	3.27973e-09	ENSMUST00000176894	1110032A03Rik	UTR3
6300	peak_6300	chr6	82559378	82559628	41.9842	+	82559378	82559628	0	1	250	0	1	159	8.12162	2.07132e-13	2.29871e-13	ENSMUST00000203775	Tacr1	UTR3
12385	peak_12385	chr11	76494130	76494180	27.3813	-	76494130	76494180	0	1	50	0	0	74	8.12116	5.62251e-09	5.72015e-09	ENSMUST00000137261	Abr	UTR3
13148	peak_13148	chr12	56533007	56533057	26.4255	-	56533007	56533057	0	1	50	0	0	90	8.11809	1.09531e-08	1.10955e-08	ENSMUST00000001536	Nkx2-1	UTR3
10892	peak_10892	chr10	120901656	120901731	25.3095	+	120901656	120901731	0	1	75	0	0	48	8.11801	2.38177e-08	2.40474e-08	ENSMUST00000145987	Gm4473	UTR5
15342	peak_15342	chr15	98288387	98288437	26.5992	-	98288387	98288437	0	1	50	0	0	58	8.11661	9.70536e-09	9.83683e-09	ENSMUST00000023722	Zfp641	UTR3
11302	peak_11302	chr10	114401322	114401397	25.8578	-	114401322	114401397	0	1	75	0	0	45	8.11469	1.62682e-08	1.64447e-08	ENSMUST00000061632	Trhde	UTR3
3547	peak_3547	chr3	116251178	116251353	43.6462	-	116251178	116251353	0	1	175	0	1	151	8.10234	6.46466e-14	7.26436e-14	ENSMUST00000090473	Gpr88	UTR3
9539	peak_9539	chr9	44120309	44120359	24.8289	+	44120309	44120359	0	1	50	0	0	48	8.09922	3.32952e-08	3.35545e-08	ENSMUST00000213646	Gm26737	UTR5
10878	peak_10878	chr10	112463708	112463758	23.0831	+	112463708	112463758	0	1	50	0	0	46	8.09463	1.12076e-07	1.12535e-07	ENSMUST00000218827	Kcnc2	UTR3
14168	peak_14168	chr14	32938771	32938946	43.8816	+	32938771	32938946	0	1	175	0	1	150	8.09131	5.48222e-14	6.17044e-14	ENSMUST00000053175	Vstm4	UTR3
12112	peak_12112	chr11	5901119	5901169	25.8891	-	5901119	5901169	0	1	50	0	0	60	8.09026	1.59144e-08	1.60923e-08	ENSMUST00000102920	Gck	UTR3
3903	peak_3903	chr4	107087763	107087813	25.0569	+	107087763	107087813	0	1	50	0	0	44	8.08783	2.8407e-08	2.865e-08	ENSMUST00000126207	Cyb5rl	UTR3
13442	peak_13442	chr13	30382050	30382275	43.4916	+	30382050	30382275	0	1	225	0	1	161	8.08574	7.20482e-14	8.08584e-14	ENSMUST00000066412	Agtr1a	UTR3
10144	peak_10144	chr9	54027255	54027305	23.2838	-	54027255	54027305	0	1	50	0	0	45	8.08396	9.74878e-08	9.79187e-08	ENSMUST00000098760	Tnfaip8l3	LastExon
17011	peak_17011	chr18	37356395	37356570	43.7321	+	37356395	37356570	0	1	175	0	1	162	8.07549	6.08562e-14	6.84421e-14	ENSMUST00000051163	Pcdhb8	LastExon
5536	peak_5536	chr5	150989277	150989352	25.7577	+	150989277	150989352	0	1	75	0	0	52	8.07506	1.74395e-08	1.76259e-08	ENSMUST00000078856	Kl	Exon
14261	peak_14261	chr14	58073234	58073309	26.8454	+	58073234	58073309	0	1	75	0	0	94	8.06928	8.17072e-09	8.29313e-09	ENSMUST00000022545	Fgf9	Exon
16033	peak_16033	chr17	17087786	17087936	42.4876	+	17087786	17087936	0	1	150	0	1	162	8.06075	1.45518e-13	1.6217e-13	ENSMUST00000127027	Zfp960	LastExon
3898	peak_3898	chr4	106747969	106748019	27.5088	+	106747969	106748019	0	1	50	0	0	87	8.05884	5.14367e-09	5.23642e-09	ENSMUST00000140541	Acot11	UTR3
2795	peak_2795	chr3	27241724	27242199	137.982	+	27241724	27242199	0	1	475	0	7	768	8.03622	1.50052e-42	2.90636e-42	ENSMUST00000046515	Nceh1	LastExon
16997	peak_16997	chr18	37303198	37303373	43.1876	+	37303198	37303373	0	1	175	0	1	155	8.0351	8.91874e-14	9.98228e-14	ENSMUST00000051754	Pcdhb3	LastExon
3902	peak_3902	chr4	107084338	107084513	43.9943	+	107084338	107084513	0	1	175	0	1	248	8.02962	5.06637e-14	5.70686e-14	ENSMUST00000106756	Cyb5rl	UTR3
5765	peak_5765	chr5	100845162	100845212	24.6323	-	100845162	100845212	0	1	50	0	0	47	8.02865	3.81784e-08	3.84549e-08	ENSMUST00000142871	4930458D05Rik	UTR3
14009	peak_14009	chr13	99397823	99397873	23.3406	-	99397823	99397873	0	1	50	0	0	47	8.02088	9.37224e-08	9.41417e-08	ENSMUST00000180491	6430562O15Rik	UTR3
12206	peak_12206	chr11	48947553	48947628	24.8025	-	48947553	48947628	0	1	75	0	0	45	8.01689	3.39147e-08	3.41752e-08	ENSMUST00000097494	9930111J21Rik1	LastExon
15894	peak_15894	chr16	59653832	59654007	42.6428	-	59653832	59654007	0	1	175	0	1	146	8.01227	1.30604e-13	1.45627e-13	ENSMUST00000068860	Epha6	UTR3
14730	peak_14730	chr15	10721617	10721667	23.5403	+	10721617	10721667	0	1	50	0	0	43	8.01144	8.15815e-08	8.19731e-08	ENSMUST00000181739	4930556M19Rik	UTR5
5241	peak_5241	chr5	114165867	114165942	26.1694	+	114165867	114165942	0	1	75	0	0	83	7.99824	1.30967e-08	1.32503e-08	ENSMUST00000031583	Acacb	Exon
9865	peak_9865	chr9	110899632	110899682	25.9873	+	110899632	110899682	0	1	50	0	0	66	7.99666	1.48634e-08	1.50328e-08	ENSMUST00000155014	Als2cl	UTR3
14346	peak_14346	chr14	74706238	74706638	125.86	+	74706238	74706638	0	1	400	0	7	746	7.99439	7.05412e-39	1.29509e-38	ENSMUST00000036653	Htr2a	LastExon
9101	peak_9101	chr8	69881193	69881318	27.1989	-	69881193	69881318	0	1	125	0	0	119	7.99388	6.38579e-09	6.491e-09	ENSMUST00000057831	Cilp2	LastExon
3755	peak_3755	chr4	44970930	44970980	23.5858	+	44970930	44970980	0	1	50	0	0	50	7.98238	7.90393e-08	7.94272e-08	ENSMUST00000123899	Gm12679	UTR3
14897	peak_14897	chr15	85801258	85801333	25.1096	+	85801258	85801333	0	1	75	0	0	81	7.97802	2.73826e-08	2.76213e-08	ENSMUST00000057979	Ppara	LastExon
11964	peak_11964	chr11	111072502	111073377	360.08	+	111072502	111073377	0	1	875	0	21	2126	7.97745	9.50304e-110	4.02847e-109	ENSMUST00000042970	Kcnj2	LastExon
3011	peak_3011	chr3	90226134	90226334	46.0966	+	90226134	90226334	0	1	200	0	2	244	7.95916	1.16167e-14	1.32902e-14	ENSMUST00000107373	Rab13	UTR3
2283	peak_2283	chr2	91195101	91196030	41.6407	-	91195101	91196030	0	2	50125	0,804	1	142	7.95338	2.63362e-13	2.91683e-13	ENSMUST00000131634	Gm13783	UTR3
7630	peak_7630	chr7	139876152	139876477	46.8089	+	139876152	139876477	0	1	325	0	2	335	7.94941	7.05798e-15	8.11161e-15	ENSMUST00000026548	Adgra1	LastExon
1848	peak_1848	chr2	156577160	156577457	63.1016	+	156577160	156577457	0	1	297	0	3	359	7.93724	7.83225e-20	1.01048e-19	ENSMUST00000144818	Gm14168	UTR5
97	peak_97	chr1	40313317	40313867	63.123	+	40313317	40313867	0	1	550	0	3	376	7.93305	7.71551e-20	9.9562e-20	ENSMUST00000114795	Il1r1	LastExon
18628	peak_18628	chrX	167474908	167474983	23.2173	-	167474908	167474983	0	1	75	0	0	43	7.92873	1.02101e-07	1.02541e-07	ENSMUST00000112145	Frmpd4	UTR3
535	peak_535	chr1	188211702	188211977	80.2809	+	188211702	188211977	0	1	275	0	4	431	7.92829	4.73367e-25	6.80817e-25	ENSMUST00000110938	Esrrg	UTR3
395	peak_395	chr1	146728730	146728780	24.597	+	146728730	146728780	0	1	50	0	0	46	7.92821	3.91251e-08	3.94064e-08	ENSMUST00000116191	Gm15583	UTR5
18433	peak_18433	chrX	49343900	49343975	23.9292	-	49343900	49343975	0	1	75	0	0	41	7.92471	6.22518e-08	6.26012e-08	ENSMUST00000144294	Gm14696	UTR3
7497	peak_7497	chr7	110629113	110629538	66.549	+	110629113	110629538	0	1	425	0	9	1182	7.92017	7.01897e-21	9.26333e-21	ENSMUST00000033054	Adm	LastExon
1190	peak_1190	chr1	191895036	191895286	40.6388	-	191895036	191895286	0	1	250	0	1	139	7.91239	5.31749e-13	5.84105e-13	ENSMUST00000139827	1700034H15Rik	UTR3
11954	peak_11954	chr11	108423322	108423547	40.4929	+	108423322	108423547	0	1	225	0	1	175	7.90688	5.89054e-13	6.46291e-13	ENSMUST00000119828	Gm11667	UTR5
7321	peak_7321	chr7	64269063	64269138	23.3632	+	64269063	64269138	0	1	75	0	0	42	7.90117	9.226e-08	9.26779e-08	ENSMUST00000206263	Trpm1	LastExon
15512	peak_15512	chr16	25959065	25959365	44.5349	+	25959065	25959365	0	1	300	0	2	248	7.88407	3.46539e-14	3.92341e-14	ENSMUST00000161614	Gm4524	UTR5
3751	peak_3751	chr4	44107234	44107284	22.4586	+	44107234	44107284	0	1	50	0	0	43	7.87438	1.72955e-07	1.73495e-07	ENSMUST00000146576	Gm12503	UTR5
8308	peak_8308	chr7	140047424	140047574	38.7595	-	140047424	140047574	0	1	150	0	1	135	7.87271	1.98201e-12	2.1489e-12	ENSMUST00000172775	Msx3	UTR3
10938	peak_10938	chr10	5021152	5021702	177.889	-	5021152	5021702	0	1	550	0	10	939	7.85429	1.25562e-54	2.81947e-54	ENSMUST00000215295	Syne1	UTR3
13752	peak_13752	chr13	38022196	38022296	40.4966	-	38022196	38022296	0	1	100	0	1	129	7.84847	5.87502e-13	6.44626e-13	ENSMUST00000089840	Cage1	UTR3
11388	peak_11388	chr11	3489619	3489694	25.2724	+	3489619	3489694	0	1	75	0	0	67	7.83542	2.44437e-08	2.46742e-08	ENSMUST00000151860	Pla2g3	UTR5
7039	peak_7039	chr7	12983339	12983689	123.335	+	12983339	12983689	0	1	350	0	7	700	7.83463	4.10826e-38	7.45432e-38	ENSMUST00000108536	Zfp446	UTR3
10078	peak_10078	chr9	44066676	44066826	39.2451	-	44066676	44066826	0	1	150	0	1	129	7.82244	1.41126e-12	1.53483e-12	ENSMUST00000185479	Gm49380	UTR3
13923	peak_13923	chr13	67818916	67819091	39.2599	-	67818916	67819091	0	1	175	0	1	135	7.82081	1.39651e-12	1.51914e-12	ENSMUST00000181912	4930525G20Rik	UTR3
7474	peak_7474	chr7	104247680	104247730	23.2416	+	104247680	104247730	0	1	50	0	0	41	7.82035	1.00389e-07	1.00827e-07	ENSMUST00000106848	Trim34a	UTR5
17294	peak_17294	chr18	31945396	31945471	21.8717	-	31945396	31945471	0	1	75	0	0	44	7.80032	2.59861e-07	2.60589e-07	ENSMUST00000064016	Gpr17	UTR3
9428	peak_9428	chr9	8610071	8610246	39.7605	+	8610071	8610246	0	1	175	0	1	133	7.79495	9.832e-13	1.07374e-12	ENSMUST00000214596	Trpc6	Exon
15386	peak_15386	chr15	101053893	101054068	26.8328	-	101053893	101054068	0	1	175	0	0	140	7.79195	8.24351e-09	8.3661e-09	ENSMUST00000178140	Fignl2	LastExon
7526	peak_7526	chr7	121501598	121501768	39.7435	+	121501598	121501768	0	1	170	0	1	138	7.78097	9.95077e-13	1.08646e-12	ENSMUST00000084628	Hs3st2	UTR3
6535	peak_6535	chr6	3374181	3374331	39.8127	-	3374181	3374331	0	1	150	0	1	131	7.77656	9.47959e-13	1.03556e-12	ENSMUST00000120087	Samd9l	LastExon
17968	peak_17968	chr19	17328690	17328965	42.2904	-	17328690	17328965	0	1	275	0	2	202	7.77648	1.67095e-13	1.85916e-13	ENSMUST00000236139	Gcnt1	UTR3
15334	peak_15334	chr15	97245748	97245923	37.8967	-	97245748	97245923	0	1	175	0	1	133	7.75875	3.62518e-12	3.90815e-12	ENSMUST00000053106	Amigo2	LastExon
3489	peak_3489	chr3	102184093	102184443	77.5008	-	102184093	102184443	0	1	350	0	4	472	7.75638	3.30344e-24	4.67678e-24	ENSMUST00000168312	Vangl1	Exon
4880	peak_4880	chr5	14858902	14859277	191.505	+	14858902	14859277	0	1	375	0	12	1120	7.75031	9.46847e-59	2.24522e-58	ENSMUST00000030691	Pclo	UTR3
4180	peak_4180	chr4	150102752	150102977	39.2068	+	150102752	150102977	0	1	225	0	1	160	7.73103	1.44975e-12	1.57605e-12	ENSMUST00000094451	Gpr157	UTR3
6235	peak_6235	chr6	48742870	48742970	25.1652	+	48742870	48742970	0	1	100	0	0	103	7.71595	2.63419e-08	2.65773e-08	ENSMUST00000203797	Gimap1	UTR5
3589	peak_3589	chr3	131322884	131323084	73.8266	-	131322884	131323084	0	1	200	0	4	375	7.71457	4.31587e-23	5.96992e-23	ENSMUST00000090246	Sgms2	UTR3
5941	peak_5941	chr5	127783815	127784115	42.8885	-	127783815	127784115	0	1	300	0	2	253	7.71426	1.10016e-13	1.22825e-13	ENSMUST00000044441	Tmem132d	LastExon
1126	peak_1126	chr1	180437086	180437286	39.1779	-	180437086	180437286	0	1	200	0	1	140	7.71212	1.47943e-12	1.60794e-12	ENSMUST00000136521	Stum	UTR3
3457	peak_3457	chr3	96284083	96284283	40.452	-	96284083	96284283	0	1	200	0	1	182	7.70971	6.06231e-13	6.64863e-13	ENSMUST00000029748	Fcgr1	UTR3
16626	peak_16626	chr17	34627423	34627523	25.3712	-	34627423	34627523	0	1	100	0	0	105	7.70777	2.28174e-08	2.30412e-08	ENSMUST00000169067	Ppt2	UTR5
11785	peak_11785	chr11	83069789	83069964	36.6149	+	83069789	83069964	0	1	175	0	1	124	7.69696	8.87462e-12	9.50193e-12	ENSMUST00000038038	Slfn2	LastExon
7687	peak_7687	chr7	6676042	6676217	39.0117	-	6676042	6676217	0	1	175	0	1	123	7.68755	1.66182e-12	1.80428e-12	ENSMUST00000122432	Zim1	UTR3
14345	peak_14345	chr14	74642039	74642264	38.7524	+	74642039	74642264	0	1	225	0	1	120	7.6813	1.99192e-12	2.15953e-12	ENSMUST00000036653	Htr2a	Exon
13586	peak_13586	chr13	67208086	67208236	39.0798	+	67208086	67208236	0	1	150	0	1	134	7.67547	1.58446e-12	1.72109e-12	ENSMUST00000117110	Zfp455	UTR3
9540	peak_9540	chr9	44121034	44121359	86.6949	+	44121034	44121359	0	1	325	0	5	458	7.67047	5.33943e-27	7.9845e-27	ENSMUST00000181106	Gm26737	UTR5
13725	peak_13725	chr13	24598112	24598262	40.6744	-	24598112	24598262	0	1	150	0	2	190	7.66966	5.18656e-13	5.69892e-13	ENSMUST00000135889	Gm11346	UTR3
8517	peak_8517	chr8	60671992	60672342	122.478	+	60671992	60672342	0	1	350	0	7	609	7.65702	7.47455e-38	1.34993e-37	ENSMUST00000034066	Mfap3l	UTR3
18257	peak_18257	chrX	102073481	102073556	24.088	+	102073481	102073556	0	1	75	0	0	76	7.65143	5.5745e-08	5.60791e-08	ENSMUST00000129185	Nhsl2	UTR5
10960	peak_10960	chr10	10688533	10688583	37.2663	-	10688533	10688583	0	1	50	0	1	126	7.64858	5.63224e-12	6.04948e-12	ENSMUST00000044306	Grm1	UTR3
17068	peak_17068	chr18	37658081	37658156	36.7471	+	37658081	37658156	0	1	75	0	1	115	7.64731	8.09195e-12	8.66991e-12	ENSMUST00000097608	3222401L13Rik	UTR5
16255	peak_16255	chr17	42504076	42504401	58.5877	+	42504076	42504401	0	1	325	0	3	282	7.64709	1.84775e-18	2.30857e-18	ENSMUST00000232968	Ptchd4	UTR3
9953	peak_9953	chr9	13243989	13244589	940.938	-	13243989	13244589	0	1	600	0	171	14476	7.64173	1.35001e-285	5.61431e-284	ENSMUST00000110582	Jrkl	UTR3
5573	peak_5573	chr5	24438439	24438639	439.002	-	24438439	24438639	0	1	200	0	38	3043	7.64109	1.26267e-133	7.03284e-133	ENSMUST00000158071	Gm22333	UTR3
10659	peak_10659	chr10	68782352	68782577	57.0286	+	68782352	68782577	0	1	225	0	3	271	7.6387	5.50609e-18	6.80265e-18	ENSMUST00000080995	Tmem26	UTR3
9879	peak_9879	chr9	115200597	115200647	23.5935	+	115200597	115200647	0	1	50	0	0	68	7.63754	7.86127e-08	7.90028e-08	ENSMUST00000182789	Gm27002	UTR5
3250	peak_3250	chr3	26133300	26133725	Inf	-	26133300	26133725	0	1	425	0	330	25952	7.63226	0	0	ENSMUST00000192774	Nlgn1	UTR3
4389	peak_4389	chr4	62448952	62449102	37.2072	-	62448952	62449102	0	1	150	0	1	111	7.63192	5.86933e-12	6.30268e-12	ENSMUST00000146108	Wdr31	UTR3
3875	peak_3875	chr4	100442278	100442778	110.416	+	100442278	100442778	0	1	500	0	23	1947	7.62348	3.3947e-34	5.77331e-34	ENSMUST00000039630	Ror1	UTR3
10683	peak_10683	chr10	74631730	74631905	37.6755	+	74631730	74631905	0	1	175	0	1	116	7.621	4.23342e-12	4.5557e-12	ENSMUST00000125055	Pcdh15	UTR3
3120	peak_3120	chr3	107104773	107104973	41.6574	+	107104773	107104973	0	1	200	0	2	212	7.61231	2.60284e-13	2.88325e-13	ENSMUST00000196403	Kcna2	LastExon
5081	peak_5081	chr5	75195073	75195748	Inf	+	75195073	75195748	0	1	675	0	118	9287	7.5959	0	0	ENSMUST00000168162	Pdgfra	LastExon
10140	peak_10140	chr9	53686284	53686609	281.981	-	53686284	53686609	0	1	325	0	21	1614	7.58692	4.03529e-86	1.3041e-85	ENSMUST00000068449	Rab39	UTR3
7333	peak_7333	chr7	67151032	67151607	63.3942	+	67151032	67151607	0	1	575	0	24	2275	7.5813	6.38153e-20	8.24967e-20	ENSMUST00000107478	Adamts17	UTR3
14072	peak_14072	chr13	116298980	116299330	34.6855	-	116298980	116299330	0	1	350	0	9	891	7.56923	3.42105e-11	3.6194e-11	ENSMUST00000036060	Isl1	UTR3
17035	peak_17035	chr18	37480242	37480317	35.8168	+	37480242	37480317	0	1	75	0	1	111	7.55192	1.55106e-11	1.65224e-11	ENSMUST00000051442	Pcdhb16	LastExon
15951	peak_15951	chr16	92695984	92696159	36.7597	-	92695984	92696159	0	1	175	0	1	106	7.55091	8.02087e-12	8.59474e-12	ENSMUST00000189126	Runx1	UTR3
16253	peak_16253	chr17	42503001	42503351	55.6569	+	42503001	42503351	0	1	350	0	3	258	7.55081	1.4391e-17	1.76034e-17	ENSMUST00000232968	Ptchd4	LastExon
10638	peak_10638	chr10	60369120	60369570	88.4795	+	60369120	60369570	0	1	450	0	5	607	7.54389	1.53131e-27	2.31742e-27	ENSMUST00000105460	Vsir	UTR3
12686	peak_12686	chr11	118392800	118393000	36.4671	-	118392800	118393000	0	1	200	0	1	118	7.53744	9.8437e-12	1.05268e-11	ENSMUST00000043722	Lgals3bp	UTR3
15012	peak_15012	chr15	11035591	11035691	35.7408	-	11035591	11035691	0	1	100	0	1	158	7.53091	1.636e-11	1.74163e-11	ENSMUST00000058007	Rxfp3	UTR3
4735	peak_4735	chr4	142031391	142037601	195.122	-	142031391	142037601	0	2	703197	0,6013	12	1644	7.52808	7.60299e-60	1.83012e-59	ENSMUST00000036572	Tmem51	UTR3
8629	peak_8629	chr8	79190222	79190847	Inf	+	79190222	79190847	0	1	625	0	305	27324	7.52347	0	0	ENSMUST00000145827	Zfp827	UTR3
10534	peak_10534	chr10	14149310	14149860	120.159	+	14149310	14149860	0	1	550	0	199	15611	7.52177	3.77303e-37	6.73907e-37	ENSMUST00000191138	Hivep2	LastExon
1026	peak_1026	chr1	158848049	158848199	36.3452	-	158848049	158848199	0	1	150	0	1	110	7.51533	1.07182e-11	1.14554e-11	ENSMUST00000159861	Pappa2	Exon
10944	peak_10944	chr10	6890020	6890070	34.408	-	6890020	6890070	0	1	50	0	1	106	7.51463	4.1525e-11	4.38703e-11	ENSMUST00000105617	Ipcef1	UTR3
14616	peak_14616	chr14	67755877	67756202	97.4118	-	67755877	67756202	0	1	325	0	6	641	7.51432	2.98906e-30	4.74394e-30	ENSMUST00000226033	Dock5	UTR3
13232	peak_13232	chr12	81199039	81199414	108.886	-	81199039	81199414	0	1	375	0	20	1909	7.50555	9.88055e-34	1.66758e-33	ENSMUST00000064594	Slc8a3	UTR3
12687	peak_12687	chr11	118393800	118394050	41.5209	-	118393800	118394050	0	1	250	0	2	273	7.49935	2.86361e-13	3.16929e-13	ENSMUST00000043722	Lgals3bp	LastExon
2568	peak_2568	chr2	155941022	155941322	65.0305	-	155941022	155941322	0	1	300	0	4	325	7.49528	2.03112e-20	2.65389e-20	ENSMUST00000040162	Gdf5	UTR3
16037	peak_16037	chr17	17146622	17146697	36.5909	+	17146622	17146697	0	1	75	0	1	116	7.49408	9.02595e-12	9.66173e-12	ENSMUST00000147630	Zfp97	UTR3
17059	peak_17059	chr18	37518352	37518577	83.2547	+	37518352	37518577	0	1	225	0	5	515	7.49182	5.91649e-26	8.66657e-26	ENSMUST00000097609	Pcdhb22	UTR5
18573	peak_18573	chrX	144382370	144382570	39.9136	-	144382370	144382570	0	1	200	0	2	177	7.48915	8.83504e-13	9.65598e-13	ENSMUST00000040184	Trpc5	UTR3
10081	peak_10081	chr9	44247561	44247736	35.9038	-	44247561	44247736	0	1	175	0	1	131	7.4884	1.45931e-11	1.55549e-11	ENSMUST00000034618	Pdzd3	UTR3
12356	peak_12356	chr11	72778056	72778306	111.699	-	72778056	72778306	0	1	250	0	7	527	7.48633	1.38607e-34	2.37265e-34	ENSMUST00000156294	Cyb5d2	UTR3
9588	peak_9588	chr9	55004512	55004687	36.0131	+	55004512	55004687	0	1	175	0	1	108	7.48341	1.35196e-11	1.44205e-11	ENSMUST00000213960	Chrna5	Exon
2209	peak_2209	chr2	63972531	63972581	34.5961	-	63972531	63972581	0	1	50	0	1	111	7.4746	3.64128e-11	3.85065e-11	ENSMUST00000131615	Fign	UTR3
7631	peak_7631	chr7	139941056	139941231	34.8362	+	139941056	139941231	0	1	175	0	1	134	7.47398	3.07946e-11	3.26041e-11	ENSMUST00000053445	Kndc1	UTR3
14367	peak_14367	chr14	79453534	79453659	52.8672	+	79453534	79453659	0	1	125	0	3	245	7.47224	1.01287e-16	1.21724e-16	ENSMUST00000100359	Kbtbd6	UTR3
1494	peak_1494	chr2	82257084	82257134	34.402	+	82257084	82257134	0	1	50	0	1	103	7.47039	4.16992e-11	4.40518e-11	ENSMUST00000047527	Zfp804a	LastExon
6971	peak_6971	chr6	142828144	142829019	752.002	-	142828144	142829019	0	1	875	0	194	13523	7.46009	2.38518e-228	4.21616e-227	ENSMUST00000205149	St8sia1	UTR3
14990	peak_14990	chr15	4022935	4023360	138.396	-	4022935	4023360	0	1	425	0	9	650	7.45924	1.12343e-42	2.1805e-42	ENSMUST00000143717	BC037032	UTR3
14993	peak_14993	chr15	5099630	5099855	38.8485	-	5099630	5099855	0	1	225	0	2	177	7.45923	1.86255e-12	2.02044e-12	ENSMUST00000118365	Card6	LastExon
670	peak_670	chr1	53812731	53813156	153.394	-	53812731	53813156	0	1	425	0	10	716	7.44889	3.25127e-47	6.66532e-47	ENSMUST00000087659	Hecw2	UTR3
17029	peak_17029	chr18	37474745	37474820	34.1637	+	37474745	37474820	0	1	75	0	1	100	7.44732	4.92963e-11	5.19656e-11	ENSMUST00000050034	Pcdhb15	LastExon
14226	peak_14226	chr14	54480030	54480230	66.9999	+	54480030	54480230	0	1	200	0	4	302	7.44279	5.11856e-21	6.77685e-21	ENSMUST00000164766	Rem2	UTR3
5039	peak_5039	chr5	52193360	52193560	66.7752	+	52193360	52193560	0	1	200	0	4	321	7.44063	5.9882e-21	7.91866e-21	ENSMUST00000180601	9230114K14Rik	UTR5
13686	peak_13686	chr13	117656789	117656889	35.1053	+	117656789	117656889	0	1	100	0	1	99	7.43933	2.55159e-11	2.70552e-11	ENSMUST00000207599	Hcn1	UTR5
16991	peak_16991	chr18	37295864	37296039	33.6648	+	37295864	37296039	0	1	175	0	1	104	7.43873	6.98735e-11	7.34326e-11	ENSMUST00000056522	Pcdhb2	LastExon
11415	peak_11415	chr11	16911807	16912407	230.189	+	16911807	16912407	0	1	600	0	16	1147	7.43314	1.86879e-70	5.08284e-70	ENSMUST00000020329	Egfr	LastExon
17425	peak_17425	chr18	66859639	66859739	39.476	-	66859639	66859739	0	1	100	0	10	897	7.42827	1.20022e-12	1.30776e-12	ENSMUST00000057942	Mc4r	LastExon
5029	peak_5029	chr5	43616356	43616406	35.3334	+	43616356	43616406	0	1	50	0	1	99	7.42806	2.17493e-11	2.30982e-11	ENSMUST00000121872	C1qtnf7	UTR3
1545	peak_1545	chr2	92953972	92954022	33.2308	+	92953972	92954022	0	1	50	0	1	102	7.42768	9.46388e-11	9.9202e-11	ENSMUST00000028648	Syt13	UTR3
8713	peak_8713	chr8	95808604	95808729	35.347	+	95808604	95808729	0	1	125	0	1	96	7.42448	2.15437e-11	2.28824e-11	ENSMUST00000211989	Gm31659	UTR3
12452	peak_12452	chr11	86061212	86061912	229.847	-	86061212	86061912	0	1	700	0	91	6224	7.42367	2.37279e-70	6.4433e-70	ENSMUST00000044423	Brip1	UTR3
16789	peak_16789	chr17	71252625	71252775	35.5103	-	71252625	71252775	0	1	150	0	1	107	7.42029	1.92213e-11	2.04332e-11	ENSMUST00000233245	Emilin2	UTR3
1997	peak_1997	chr2	12108506	12109131	307.193	-	12108506	12109131	0	1	625	0	29	1955	7.41987	9.47811e-94	3.35397e-93	ENSMUST00000172791	Itga8	UTR3
6097	peak_6097	chr5	147018079	147018629	835.296	-	147018079	147018629	0	1	550	0	149	9966	7.41392	1.42114e-253	3.554e-252	ENSMUST00000123092	Lnx2	UTR3
14999	peak_14999	chr15	7207094	7207544	586.423	-	7207094	7207544	0	1	450	0	49	3501	7.41295	3.18622e-178	2.94456e-177	ENSMUST00000160207	Egflam	UTR3
13503	peak_13503	chr13	47244597	47245272	134.605	+	47244597	47245272	0	1	675	0	9	783	7.40778	1.58431e-41	3.01968e-41	ENSMUST00000110111	Rnf144b	UTR3
2810	peak_2810	chr3	32462643	32463118	Inf	+	32462643	32463118	0	1	475	0	412	27560	7.40736	0	0	ENSMUST00000108242	Pik3ca	LastExon
16994	peak_16994	chr18	37301498	37301548	35.4697	+	37301498	37301548	0	1	50	0	1	118	7.40041	1.9776e-11	2.10156e-11	ENSMUST00000051754	Pcdhb3	LastExon
7848	peak_7848	chr7	30447733	30447933	53.8055	-	30447733	30447933	0	1	200	0	3	230	7.39702	5.2557e-17	6.35219e-17	ENSMUST00000045817	Kirrel2	UTR3
6246	peak_6246	chr6	54330119	54330194	44.6068	+	54330119	54330194	0	1	75	0	3	230	7.38928	3.29409e-14	3.73265e-14	ENSMUST00000059138	Prr15	UTR3
14025	peak_14025	chr13	101684010	101684435	645.573	-	101684010	101684435	0	1	425	0	177	11729	7.38803	3.98341e-196	4.6039e-195	ENSMUST00000035532	Pik3r1	UTR3
2611	peak_2611	chr2	160906886	160907086	35.2931	-	160906886	160907086	0	1	200	0	1	107	7.38714	2.23701e-11	2.37534e-11	ENSMUST00000057169	Emilin3	UTR3
3377	peak_3377	chr3	84444209	84444509	95.2497	-	84444209	84444509	0	1	300	0	6	544	7.38647	1.35543e-29	2.12318e-29	ENSMUST00000194027	Fhdc1	UTR3
11244	peak_11244	chr10	85098293	85098493	107.719	-	85098293	85098493	0	1	200	0	7	481	7.38472	2.23232e-33	3.74351e-33	ENSMUST00000216889	Fhl4	LastExon
13471	peak_13471	chr13	37951836	37951886	35.131	+	37951836	37951886	0	1	50	0	1	120	7.38404	2.50611e-11	2.65774e-11	ENSMUST00000037232	Rreb1	UTR3
17028	peak_17028	chr18	37474445	37474620	38.8598	+	37474445	37474620	0	1	175	0	2	162	7.37967	1.84783e-12	2.0046e-12	ENSMUST00000050034	Pcdhb15	LastExon
4453	peak_4453	chr4	98779917	98780067	35.2578	-	98779917	98780067	0	1	150	0	1	137	7.37525	2.29267e-11	2.43416e-11	ENSMUST00000102790	Kank4	Exon
7530	peak_7530	chr7	122969408	122970914	Inf	+	122969408	122970914	0	2	74351	0,1155	311	25873	7.37406	0	0	ENSMUST00000098062	Rbbp6	UTR5
3939	peak_3939	chr4	115835935	115836185	97.5117	+	115835935	115836185	0	1	250	0	6	470	7.3695	2.78685e-30	4.42642e-30	ENSMUST00000030477	Mob3c	UTR3
17000	peak_17000	chr18	37309804	37310029	65.6427	+	37309804	37310029	0	1	225	0	4	294	7.36943	1.32277e-20	1.73614e-20	ENSMUST00000056712	Pcdhb4	LastExon
10943	peak_10943	chr10	6889745	6889995	50.2293	-	6889745	6889995	0	1	250	0	3	227	7.36638	6.41536e-16	7.57684e-16	ENSMUST00000105617	Ipcef1	UTR3
423	peak_423	chr1	160075472	160075747	50.3932	+	160075472	160075747	0	1	275	0	3	245	7.36389	5.72094e-16	6.76312e-16	ENSMUST00000163892	4930523C07Rik	UTR3
15114	peak_15114	chr15	71463459	71463834	66.3177	-	71463459	71463834	0	1	375	0	4	333	7.36296	8.25306e-21	1.08735e-20	ENSMUST00000022953	Fam135b	Exon
4709	peak_4709	chr4	139966147	139966372	36.3101	-	139966147	139966372	0	1	225	0	1	205	7.35274	1.09853e-11	1.17375e-11	ENSMUST00000105031	Klhdc7a	LastExon
1544	peak_1544	chr2	92953872	92953947	29.7751	+	92953872	92953947	0	1	75	0	1	104	7.35182	1.05855e-09	1.08846e-09	ENSMUST00000028648	Syt13	UTR3
11621	peak_11621	chr11	63964225	63965890	82.9436	+	63964225	63965890	0	2	49,76	0,1589	5	431	7.3496	7.35246e-26	1.07523e-25	ENSMUST00000146915	9630013K17Rik	UTR5
9621	peak_9621	chr9	58006082	58006257	49.5639	+	58006082	58006257	0	1	175	0	3	222	7.34401	1.02333e-15	1.20167e-15	ENSMUST00000181289	Gm17322	UTR5
16825	peak_16825	chr17	83587431	83587506	32.6152	-	83587431	83587506	0	1	75	0	1	98	7.34278	1.4546e-10	1.52004e-10	ENSMUST00000051482	Kcng3	UTR3
14805	peak_14805	chr15	66919608	66919933	80.654	+	66919608	66919933	0	1	325	0	5	361	7.34061	3.64709e-25	5.25677e-25	ENSMUST00000147079	Ccn4	UTR3
17130	peak_17130	chr18	58221075	58221150	33.3628	+	58221075	58221150	0	1	75	0	1	102	7.3341	8.63059e-11	9.05284e-11	ENSMUST00000181838	Gm26507	UTR5
13737	peak_13737	chr13	31557683	31557858	38.3695	-	31557683	31557858	0	1	175	0	2	172	7.32447	2.60597e-12	2.81607e-12	ENSMUST00000170573	A530084C06Rik	UTR3
14988	peak_14988	chr15	4021835	4022035	38.3513	-	4021835	4022035	0	1	200	0	2	164	7.32293	2.6394e-12	2.85169e-12	ENSMUST00000155191	BC037032	UTR3
3089	peak_3089	chr3	103962325	103962700	628.627	+	103962325	103962700	0	1	375	0	147	9401	7.31937	5.37444e-191	5.81144e-190	ENSMUST00000151927	Rsbn1	UTR3
2222	peak_2222	chr2	66272805	66273080	213.953	-	66272805	66273080	0	1	275	0	17	1108	7.31609	1.52542e-65	3.92489e-65	ENSMUST00000156865	Scn1a	UTR3
295	peak_295	chr1	104994244	104994669	208.467	+	104994244	104994669	0	1	425	0	15	1261	7.31423	6.98718e-64	1.75893e-63	ENSMUST00000062528	Cdh20	LastExon
14995	peak_14995	chr15	5101030	5105087	66.569	-	5101030	5105087	0	2	65185	0,3872	4	304	7.31021	6.92173e-21	9.13564e-21	ENSMUST00000118365	Card6	Exon
15928	peak_15928	chr16	85900109	85900184	22.4588	-	85900109	85900184	0	1	75	0	0	91	7.30994	1.72921e-07	1.73471e-07	ENSMUST00000023611	Adamts5	Exon
14073	peak_14073	chr13	116894657	116895057	439.477	-	116894657	116895057	0	1	400	0	38	3065	7.30255	9.05455e-134	5.05985e-133	ENSMUST00000226107	Parp8	UTR3
1940	peak_1940	chr2	178421269	178421544	175.142	+	178421269	178421544	0	1	275	0	13	870	7.3021	8.49847e-54	1.8926e-53	ENSMUST00000094251	Fam217b	LastExon
7304	peak_7304	chr7	56230904	56231529	Inf	+	56230904	56231529	0	1	625	0	595	36949	7.29696	0	0	ENSMUST00000164095	Herc2	LastExon
9248	peak_9248	chr8	105254562	105254612	22.6676	-	105254562	105254612	0	1	50	0	0	96	7.29663	1.49563e-07	1.50094e-07	ENSMUST00000161745	B3gnt9	LastExon
12064	peak_12064	chr11	121206032	121206207	33.9321	+	121206032	121206207	0	1	175	0	1	90	7.29579	5.79591e-11	6.10112e-11	ENSMUST00000124925	Hexdc	UTR5
3111	peak_3111	chr3	105986841	105987116	128.616	+	105986841	105987116	0	1	275	0	9	577	7.29399	1.03104e-39	1.91805e-39	ENSMUST00000000573	Ovgp1	LastExon
11550	peak_11550	chr11	58188996	58189196	37.3675	+	58188996	58189196	0	1	200	0	2	154	7.28493	5.2482e-12	5.63991e-12	ENSMUST00000119467	Gm12250	Intergenic
14941	peak_14941	chr15	98168905	98169255	225.56	+	98168905	98169255	0	1	350	0	16	1128	7.28403	4.71547e-69	1.25829e-68	ENSMUST00000031914	Ccdc184	UTR3
14576	peak_14576	chr14	57733917	57734342	717.612	-	57733917	57734342	0	1	425	0	85	5402	7.28308	6.15465e-218	9.49233e-217	ENSMUST00000077981	Lats2	Exon
6162	peak_6162	chr6	29957028	29957353	50.8246	+	29957028	29957353	0	1	325	0	3	229	7.27844	4.22892e-16	5.0149e-16	ENSMUST00000046028	Strip2	UTR3
17416	peak_17416	chr18	62178441	62178666	61.3488	-	62178441	62178666	0	1	225	0	4	285	7.27522	2.67207e-19	3.40539e-19	ENSMUST00000053640	Adrb2	UTR3
440	peak_440	chr1	165788611	165788686	33.3891	+	165788611	165788686	0	1	75	0	1	100	7.27488	8.47255e-11	8.88957e-11	ENSMUST00000159138	Gm16565	UTR5
3881	peak_3881	chr4	102605024	102605799	652.009	+	102605024	102605799	0	1	775	0	135	8637	7.27194	4.49449e-198	5.31663e-197	ENSMUST00000097949	Pde4b	LastExon
8148	peak_8148	chr7	118134557	118135357	Inf	-	118134557	118135357	0	1	800	0	1204	72969	7.27142	0	0	ENSMUST00000179331	Smg1	UTR3
14122	peak_14122	chr14	26396657	26398144	67.8792	+	26396657	26398144	0	2	28272	0,1215	4	536	7.27054	2.76638e-21	3.68409e-21	ENSMUST00000059648	4933413J09Rik	UTR5
2748	peak_2748	chr2	181228289	181228389	33.4527	-	181228289	181228389	0	1	100	0	1	94	7.26759	8.10382e-11	8.50604e-11	ENSMUST00000149417	Helz2	UTR3
1444	peak_1444	chr2	65764613	65765238	100.751	+	65764613	65765238	0	1	625	0	53	3599	7.26679	2.89835e-31	4.6862e-31	ENSMUST00000100067	Scn2a	LastExon
14750	peak_14750	chr15	25971816	25972166	424.229	+	25971816	25972166	0	1	350	0	38	2459	7.26461	3.72933e-129	1.96942e-128	ENSMUST00000228306	Retreg1	LastExon
16224	peak_16224	chr17	35379616	35379666	20.3613	+	35379616	35379666	0	1	50	0	0	82	7.26239	7.41151e-07	7.42386e-07	ENSMUST00000113886	Gm11131	UTR3
3003	peak_3003	chr3	89782341	89782691	Inf	+	89782341	89782691	0	1	350	0	242	14522	7.25694	0	0	ENSMUST00000196726	Ube2q1	UTR3
6676	peak_6676	chr6	59353435	59353835	52.5687	-	59353435	59353835	0	1	400	0	3	315	7.25589	1.2487e-16	1.49707e-16	ENSMUST00000051065	Gprin3	LastExon
18397	peak_18397	chrX	18415755	18416005	63.5085	-	18415755	18416005	0	1	250	0	4	270	7.25522	5.89222e-20	7.62135e-20	ENSMUST00000147039	4930578C19Rik	UTR3
18505	peak_18505	chrX	102143090	102143415	435.849	-	102143090	102143415	0	1	325	0	48	2904	7.25317	1.13519e-132	6.25545e-132	ENSMUST00000056904	Ercc6l	UTR3
15649	peak_15649	chr16	78950588	78950638	33.5979	+	78950588	78950638	0	1	50	0	1	91	7.25129	7.32064e-11	7.6918e-11	ENSMUST00000023568	Chodl	UTR3
10687	peak_10687	chr10	75015620	75015970	270.095	+	75015620	75015970	0	1	350	0	21	1482	7.24985	1.58987e-82	4.9368e-82	ENSMUST00000159991	Gnaz	UTR3
7225	peak_7225	chr7	36771347	36772247	733.202	+	36771347	36772247	0	1	900	0	267	16153	7.24933	1.16682e-222	1.92381e-221	ENSMUST00000021641	Tshz3	LastExon
13653	peak_13653	chr13	99246274	99246924	160.436	+	99246274	99246924	0	1	650	0	57	3657	7.24748	2.3982e-49	5.05784e-49	ENSMUST00000056558	Zfp366	LastExon
8100	peak_8100	chr7	104300043	104300193	33.9456	-	104300043	104300193	0	1	150	0	1	100	7.247	5.7405e-11	6.0445e-11	ENSMUST00000106839	Trim12a	UTR3
6976	peak_6976	chr6	146111098	146111173	33.4181	-	146111098	146111173	0	1	75	0	1	89	7.2465	8.30204e-11	8.71262e-11	ENSMUST00000079573	Itpr2	UTR3
13194	peak_13194	chr12	74897491	74898141	711.963	-	74897491	74898141	0	1	650	0	133	7941	7.24644	3.16661e-216	4.76167e-215	ENSMUST00000042299	Kcnh5	UTR3
12397	peak_12397	chr11	77188804	77188854	32.8362	-	77188804	77188854	0	1	50	0	1	87	7.24521	1.24656e-10	1.3041e-10	ENSMUST00000108400	Efcab5	Exon
98	peak_98	chr1	40365196	40365346	32.7945	+	40365196	40365346	0	1	150	0	1	101	7.24251	1.28364e-10	1.34236e-10	ENSMUST00000194296	Il1rl2	LastExon
4917	peak_4917	chr5	27851335	27851685	62.6155	+	27851335	27851685	0	1	350	0	4	282	7.24104	1.10112e-19	1.41531e-19	ENSMUST00000036227	Htr5a	UTR3
15107	peak_15107	chr15	66782143	66782493	62.1476	-	66782143	66782493	0	1	350	0	57	3850	7.23123	1.528e-19	1.95752e-19	ENSMUST00000168589	Sla	UTR3
10455	peak_10455	chr9	116577695	116577920	216.028	-	116577695	116577920	0	1	225	0	16	1124	7.23113	3.59722e-66	9.31607e-66	ENSMUST00000173429	Rbms3	UTR3
6373	peak_6373	chr6	101209207	101209282	31.6217	+	101209207	101209282	0	1	75	0	1	96	7.22998	2.91198e-10	3.02634e-10	ENSMUST00000181770	Gm26911	UTR5
5006	peak_5006	chr5	35280240	35280515	37.8116	+	35280240	35280515	0	1	275	0	2	328	7.22673	3.84775e-12	4.14546e-12	ENSMUST00000049545	Adra2c	LastExon
2896	peak_2896	chr3	64089899	64090124	64.1684	+	64089899	64090124	0	1	225	0	4	270	7.22645	3.71263e-20	4.82391e-20	ENSMUST00000029406	Vmn2r1	Exon
12196	peak_12196	chr11	46149204	46149304	32.8515	-	46149204	46149304	0	1	100	0	1	88	7.22618	1.23337e-10	1.29037e-10	ENSMUST00000020679	Nipal4	UTR3
3243	peak_3243	chr3	17785313	17785438	37.1008	-	17785313	17785438	0	1	125	0	2	151	7.225	6.32284e-12	6.78498e-12	NA	NA	NA
7363	peak_7363	chr7	78920186	78920261	33.1184	+	78920186	78920261	0	1	75	0	1	100	7.22385	1.02386e-10	1.07244e-10	ENSMUST00000120331	Isg20	UTR3
13561	peak_13561	chr13	58408177	58408252	36.8536	+	58408177	58408252	0	1	75	0	2	143	7.21853	7.51232e-12	8.05305e-12	ENSMUST00000224479	Rmi1	LastExon
6273	peak_6273	chr6	65704137	65704737	372.386	+	65704137	65704737	0	1	600	0	43	2549	7.21774	1.80453e-113	7.95369e-113	ENSMUST00000054351	Ndnf	LastExon
4041	peak_4041	chr4	128846521	128846696	32.4362	+	128846521	128846696	0	1	175	0	1	101	7.21652	1.64861e-10	1.72084e-10	ENSMUST00000138291	Gm12968	UTR5
15864	peak_15864	chr16	46448268	46448843	929.696	-	46448268	46448843	0	1	575	0	298	17357	7.21113	3.50516e-282	1.36051e-280	ENSMUST00000023334	Nectin3	UTR3
13688	peak_13688	chr13	117976177	117976227	31.0184	+	117976177	117976227	0	1	50	0	1	87	7.20838	4.43622e-10	4.59761e-10	ENSMUST00000006991	Hcn1	LastExon
6141	peak_6141	chr6	17492078	17492228	32.9207	+	17492078	17492228	0	1	150	0	1	88	7.20795	1.17504e-10	1.22989e-10	ENSMUST00000145473	Met	UTR5
15090	peak_15090	chr15	58180878	58181403	481.973	-	58180878	58181403	0	1	525	0	72	4203	7.20523	1.27125e-146	8.1587e-146	ENSMUST00000022986	Fbxo32	UTR3
1145	peak_1145	chr1	184727214	184727314	33.5039	-	184727214	184727314	0	1	100	0	1	97	7.20462	7.81772e-11	8.20945e-11	ENSMUST00000174257	Hlx	UTR3
16661	peak_16661	chr17	43627112	43627287	32.8757	-	43627112	43627287	0	1	175	0	1	89	7.20076	1.21251e-10	1.2689e-10	ENSMUST00000233077	Tdrd6	Exon
2612	peak_2612	chr2	160907436	160907486	32.5175	-	160907436	160907486	0	1	50	0	1	113	7.19972	1.55725e-10	1.62648e-10	ENSMUST00000057169	Emilin3	UTR3
4070	peak_4070	chr4	132580521	132580571	33.3917	+	132580521	132580571	0	1	50	0	1	100	7.1963	8.45645e-11	8.87368e-11	ENSMUST00000070690	Ptafr	UTR3
15893	peak_15893	chr16	59653682	59653732	32.5389	-	59653682	59653732	0	1	50	0	1	89	7.1937	1.53406e-10	1.60253e-10	ENSMUST00000068860	Epha6	UTR3
1932	peak_1932	chr2	177477932	177478129	596.882	+	177477932	177478129	0	1	197	0	75	4345	7.19179	2.18218e-181	2.09244e-180	ENSMUST00000099002	Zfp970	UTR3
117	peak_117	chr1	55238051	55239301	1000.84	+	55238051	55239301	0	1	1250	0	176	11179	7.19056	9.31752e-304	5.21306e-302	ENSMUST00000061334	Mars2	LastExon
14742	peak_14742	chr15	21586044	21586669	383.262	+	21586044	21586669	0	1	625	0	38	2211	7.18884	9.28232e-117	4.23247e-116	ENSMUST00000075132	Cdh12	LastExon
13174	peak_13174	chr12	70013584	70014109	573.215	-	70013584	70014109	0	1	525	0	75	4362	7.18277	3.16591e-174	2.78752e-173	ENSMUST00000085314	Nin	UTR3
2729	peak_2729	chr2	178413380	178413555	32.7661	-	178413380	178413555	0	1	175	0	1	169	7.17726	1.3092e-10	1.36901e-10	ENSMUST00000058678	Ppp1r3d	LastExon
16288	peak_16288	chr17	46892195	46892420	48.6925	+	46892195	46892420	0	1	225	0	3	231	7.17658	1.88537e-15	2.19841e-15	NA	NA	NA
12966	peak_12966	chr12	91539685	91539785	36.7508	+	91539685	91539785	0	1	100	0	2	156	7.17115	8.07113e-12	8.64811e-12	ENSMUST00000021346	Tshr	UTR3
10945	peak_10945	chr10	7119837	7120212	289.183	-	7119837	7120212	0	1	375	0	26	1543	7.17083	2.66555e-88	8.85869e-88	ENSMUST00000150282	Cnksr3	UTR3
11496	peak_11496	chr11	46480734	46480859	32.8527	+	46480734	46480859	0	1	125	0	1	88	7.169	1.2323e-10	1.28932e-10	ENSMUST00000109229	Havcr2	UTR3
16944	peak_16944	chr18	34863675	34863975	154.815	+	34863675	34863975	0	1	300	0	11	840	7.16819	1.20615e-47	2.4894e-47	ENSMUST00000165033	Egr1	LastExon
10127	peak_10127	chr9	52002623	52002923	91.1482	-	52002623	52002923	0	1	300	0	6	554	7.16739	2.37761e-28	3.64467e-28	ENSMUST00000182467	Gm6981	UTR3
3534	peak_3534	chr3	109782264	109782614	240.191	-	109782264	109782614	0	1	350	0	19	1303	7.1668	1.7667e-73	4.95714e-73	ENSMUST00000128219	Ntng1	UTR3
14765	peak_14765	chr15	34842002	34842177	31.7085	+	34842002	34842177	0	1	175	0	1	82	7.16471	2.74097e-10	2.84972e-10	ENSMUST00000228725	Kcns2	UTR3
1194	peak_1194	chr1	192897306	192897531	742.39	-	192897306	192897531	0	1	225	0	100	6494	7.16345	1.9393e-225	3.29964e-224	ENSMUST00000016344	Syt14	UTR3
14767	peak_14767	chr15	39030893	39031243	325.802	+	39030893	39031243	0	1	350	0	29	1642	7.1618	2.23444e-99	8.38973e-99	ENSMUST00000022906	Fzd6	Exon
17023	peak_17023	chr18	37442816	37442891	32.1382	+	37442816	37442891	0	1	75	0	1	84	7.15551	2.03014e-10	2.11565e-10	ENSMUST00000056915	Pcdhb13	LastExon
573	peak_573	chr1	9724371	9724871	Inf	-	9724371	9724871	0	1	500	0	436	24293	7.15338	0	0	ENSMUST00000057438	Vcpip1	UTR3
17821	peak_17821	chr19	53541383	53541483	32.4705	+	53541383	53541483	0	1	100	0	1	105	7.15034	1.60956e-10	1.68037e-10	ENSMUST00000038287	Dusp5	UTR3
10350	peak_10350	chr9	100458818	100459118	110.151	-	100458818	100459118	0	1	300	0	8	600	7.14759	4.08545e-34	6.93793e-34	ENSMUST00000125259	Il20rb	UTR3
12873	peak_12873	chr12	73777941	73778116	61.513	+	73777941	73778116	0	1	175	0	4	254	7.14563	2.3814e-19	3.0391e-19	ENSMUST00000021527	Prkch	UTR3
10447	peak_10447	chr9	110722087	110722437	483.94	-	110722087	110722437	0	1	350	0	68	6373	7.14431	3.22988e-147	2.08654e-146	ENSMUST00000006005	Pth1r	UTR3
18281	peak_18281	chrX	119928256	119928381	36.4544	+	119928256	119928381	0	1	125	0	2	145	7.14428	9.93214e-12	1.06202e-11	ENSMUST00000113366	Pabpc5	LastExon
5439	peak_5439	chr5	138996555	138996730	33.5285	+	138996555	138996730	0	1	175	0	1	143	7.14351	7.68478e-11	8.07075e-11	ENSMUST00000100518	6330403L08Rik	UTR5
13988	peak_13988	chr13	94357763	94358238	189.605	-	94357763	94358238	0	1	475	0	15	850	7.14283	3.56308e-58	8.37968e-58	ENSMUST00000221110	Gm9776	UTR3
1575	peak_1575	chr2	110012198	110012773	422.065	+	110012198	110012773	0	1	575	0	38	2204	7.13947	1.68328e-128	8.82418e-128	ENSMUST00000111037	Lgr4	LastExon
12204	peak_12204	chr11	48865827	48865952	35.9038	-	48865827	48865952	0	1	125	0	2	140	7.13124	1.4593e-11	1.55549e-11	ENSMUST00000097271	Irgm1	LastExon
12585	peak_12585	chr11	105166400	105166600	33.6284	-	105166400	105166600	0	1	200	0	1	150	7.12888	7.16654e-11	7.53073e-11	ENSMUST00000118770	Gm11620	UTR3
8587	peak_8587	chr8	71890206	71890756	276.389	+	71890206	71890756	0	1	550	0	25	1389	7.11687	1.98481e-84	6.28894e-84	ENSMUST00000034259	Zfp709	LastExon
11095	peak_11095	chr10	67267113	67267563	656.64	-	67267113	67267563	0	1	450	0	81	4457	7.11579	1.78177e-199	2.14584e-198	ENSMUST00000077839	Nrbf2	UTR3
2864	peak_2864	chr3	54317673	54318248	240.931	+	54317673	54318248	0	1	575	0	25	1435	7.11509	1.05624e-73	2.96905e-73	ENSMUST00000200341	Trpc4	UTR3
7445	peak_7445	chr7	100184626	100184851	93.1697	+	100184626	100184851	0	1	225	0	7	421	7.1124	5.79107e-29	8.97691e-29	ENSMUST00000179842	Kcne3	UTR3
6674	peak_6674	chr6	58935164	58935589	293.373	-	58935164	58935589	0	1	425	0	33	1999	7.10911	1.43741e-89	4.85328e-89	ENSMUST00000089860	Fam13a	UTR3
13157	peak_13157	chr12	66470242	66470492	80.3648	-	66470242	66470492	0	1	250	0	6	343	7.10545	4.46536e-25	6.42376e-25	ENSMUST00000037181	Mdga2	UTR3
4496	peak_4496	chr4	116820431	116820531	32.1142	-	116820431	116820531	0	1	100	0	1	138	7.10492	2.06435e-10	2.15106e-10	ENSMUST00000055436	Hpdl	LastExon
3537	peak_3537	chr3	109935205	110135683	111.837	-	109935205	110135683	0	2	4421	0,200057	8	460	7.10095	1.25879e-34	2.15596e-34	ENSMUST00000106570	Ntng1	Exon
14344	peak_14344	chr14	74641539	74641614	31.2094	+	74641539	74641614	0	1	75	0	1	83	7.09791	3.88225e-10	4.02752e-10	ENSMUST00000036653	Htr2a	UTR5
5348	peak_5348	chr5	125787645	125788245	248.871	+	125787645	125788245	0	1	600	0	141	10547	7.09481	4.19121e-76	1.20914e-75	ENSMUST00000031446	Tmem132b	LastExon
7895	peak_7895	chr7	42662554	42662804	86.1653	-	42662554	42662804	0	1	250	0	6	370	7.09472	7.7311e-27	1.15258e-26	ENSMUST00000107992	Zfp975	LastExon
10841	peak_10841	chr10	94587003	94587253	60.8054	+	94587003	94587253	0	1	250	0	4	270	7.09349	3.91031e-19	4.96307e-19	ENSMUST00000117929	Tmcc3	LastExon
17052	peak_17052	chr18	37505688	37505938	68.1016	+	37505688	37505938	0	1	250	0	5	406	7.09303	2.36692e-21	3.15776e-21	ENSMUST00000052179	Pcdhb20	LastExon
8800	peak_8800	chr8	110223187	110223637	377.762	+	110223187	110223637	0	1	450	0	42	2270	7.09116	4.26957e-115	1.91539e-114	ENSMUST00000056972	Cmtr2	LastExon
6916	peak_6916	chr6	126101662	126101787	71.1072	-	126101662	126101787	0	1	125	0	5	346	7.09033	2.89281e-22	3.932e-22	ENSMUST00000050484	Ntf3	UTR3
12251	peak_12251	chr11	59199835	59200260	858.712	-	59199835	59200260	0	1	425	0	137	7926	7.08969	1.14196e-260	3.1755e-259	ENSMUST00000154354	2610507I01Rik	UTR3
9432	peak_9432	chr9	13705895	13706920	Inf	+	13705895	13706920	0	1	1025	0	187	10375	7.08922	0	0	ENSMUST00000177755	Maml2	LastExon
2039	peak_2039	chr2	25576740	25577040	36.0392	-	25576740	25577040	0	1	300	0	2	268	7.08426	1.32739e-11	1.41617e-11	ENSMUST00000191602	Ajm1	UTR3
7324	peak_7324	chr7	64340008	64340407	545.829	+	64340008	64340407	0	1	399	0	56	3096	7.0823	6.09504e-166	4.88836e-165	ENSMUST00000032736	Mtmr10	UTR3
7148	peak_7148	chr7	27517810	27517885	32.55	+	27517810	27517885	0	1	75	0	1	115	7.08214	1.52214e-10	1.59025e-10	ENSMUST00000108355	Prx	UTR3
10142	peak_10142	chr9	54026780	54026930	30.951	-	54026780	54026930	0	1	150	0	1	81	7.08032	4.65076e-10	4.81754e-10	ENSMUST00000098760	Tnfaip8l3	UTR3
17290	peak_17290	chr18	31583192	31583642	Inf	-	31583192	31583642	0	1	450	0	397	21499	7.07952	0	0	ENSMUST00000060396	Slc25a46	LastExon
9309	peak_9309	chr8	113698450	113698900	419.58	-	113698450	113698900	0	1	450	0	59	3135	7.0783	9.50841e-128	4.94008e-127	ENSMUST00000212665	Adamts18	UTR3
15011	peak_15011	chr15	11035466	11035566	31.9519	-	11035466	11035566	0	1	100	0	1	98	7.07771	2.31262e-10	2.40719e-10	ENSMUST00000058007	Rxfp3	UTR3
6565	peak_6565	chr6	25689409	25689509	30.991	-	25689409	25689509	0	1	100	0	1	92	7.07619	4.52251e-10	4.68574e-10	ENSMUST00000054867	Gpr37	UTR5
9241	peak_9241	chr8	102634044	102634619	969.745	-	102634044	102634619	0	1	575	0	313	16648	7.07618	2.47725e-294	1.19569e-292	ENSMUST00000075190	Cdh11	UTR3
4140	peak_4140	chr4	145827804	145828229	219.767	+	145827804	145828229	0	1	425	0	18	1173	7.0739	2.65809e-67	6.97506e-67	ENSMUST00000122051	Znf41-ps	UTR5
16308	peak_16308	chr17	49096836	49097311	135.165	+	49096836	49097311	0	1	475	0	10	1123	7.07124	1.07107e-41	2.04752e-41	ENSMUST00000046254	Lrfn2	LastExon
3313	peak_3313	chr3	54898792	54899742	684.552	-	54898792	54899742	0	1	950	0	121	7094	7.07022	6.35817e-208	8.49778e-207	ENSMUST00000070342	Sertm1	UTR3
9286	peak_9286	chr8	109953611	109953786	31.8758	-	109953611	109953786	0	1	175	0	1	84	7.06704	2.4384e-10	2.53756e-10	ENSMUST00000051430	Marveld3	UTR3
17018	peak_17018	chr18	37402454	37402629	36.1199	+	37402454	37402629	0	1	175	0	2	267	7.06441	1.25464e-11	1.33916e-11	ENSMUST00000057228	Pcdhb9	LastExon
3867	peak_3867	chr4	98934110	98934935	807.459	+	98934110	98934935	0	1	825	0	1385	73182	7.06318	3.76993e-245	8.52398e-244	ENSMUST00000091358	Usp1	LastExon
11123	peak_11123	chr10	76459643	76459943	58.3294	-	76459643	76459943	0	1	300	0	4	251	7.06259	2.215e-18	2.7613e-18	ENSMUST00000049185	Ybey	UTR3
2369	peak_2369	chr2	119269750	119269925	45.2873	-	119269750	119269925	0	1	175	0	3	310	7.06216	2.04845e-14	2.32896e-14	ENSMUST00000037360	Rhov	UTR3
2496	peak_2496	chr2	143826952	143827077	31.5946	-	143826952	143827077	0	1	125	0	1	119	7.06078	2.96761e-10	3.08372e-10	ENSMUST00000099296	Bfsp1	LastExon
13877	peak_13877	chr13	67254917	67255092	58.2069	-	67254917	67255092	0	1	175	0	4	238	7.06058	2.41375e-18	3.00585e-18	ENSMUST00000225772	Zfp458	UTR3
18630	peak_18630	chrX	167477242	167477342	31.2671	-	167477242	167477342	0	1	100	0	1	101	7.05842	3.72937e-10	3.86957e-10	ENSMUST00000112145	Frmpd4	Exon
17017	peak_17017	chr18	37402254	37402354	30.3687	+	37402254	37402354	0	1	100	0	1	87	7.05736	6.98975e-10	7.21314e-10	ENSMUST00000057228	Pcdhb9	LastExon
3357	peak_3357	chr3	73050850	73051250	197.633	-	73050850	73051250	0	1	400	0	18	994	7.05723	1.32342e-60	3.2105e-60	ENSMUST00000059407	Slitrk3	LastExon
15798	peak_15798	chr16	26358816	26359016	163.261	-	26358816	26359016	0	1	200	0	15	809	7.05494	3.34169e-50	7.1357e-50	ENSMUST00000232215	Cldn1	UTR3
9794	peak_9794	chr9	107348143	107348293	34.358	+	107348143	107348293	0	1	150	0	2	204	7.0549	4.30034e-11	4.54167e-11	ENSMUST00000042581	6430571L13Rik	UTR3
10865	peak_10865	chr10	105575493	105575668	47.8278	+	105575493	105575668	0	1	175	0	3	188	7.0517	3.45488e-15	4.00322e-15	ENSMUST00000145794	Gm15663	UTR5
18139	peak_18139	chrX	36169022	36169247	70.1776	+	36169022	36169247	0	1	225	0	5	300	7.05046	5.53749e-22	7.48903e-22	ENSMUST00000033418	Il13ra1	UTR3
10163	peak_10163	chr9	56618624	56618674	31.994	-	56618624	56618674	0	1	50	0	1	162	7.04995	2.24539e-10	2.338e-10	ENSMUST00000210032	Lingo1	UTR3
16166	peak_16166	chr17	29894742	29894992	60.3964	+	29894742	29894992	0	1	250	0	4	350	7.04793	5.20814e-19	6.58966e-19	ENSMUST00000149552	Gm16758	UTR5
15079	peak_15079	chr15	56667351	56667676	82.667	-	56667351	56667676	0	1	325	0	6	343	7.04341	8.92399e-26	1.30239e-25	ENSMUST00000050544	Has2	UTR3
7432	peak_7432	chr7	97685572	97686222	Inf	+	97685572	97686222	0	1	650	0	1605	83222	7.04223	0	0	ENSMUST00000123731	Rsf1	UTR3
18192	peak_18192	chrX	72838286	72838386	30.0915	+	72838286	72838386	0	1	100	0	1	88	7.04075	8.48428e-10	8.74091e-10	ENSMUST00000033711	Gabrq	LastExon
604	peak_604	chr1	25093681	25094406	609.472	-	25093681	25094406	0	1	725	0	262	13686	7.04043	3.3895e-185	3.39332e-184	ENSMUST00000126096	Adgrb3	UTR3
8681	peak_8681	chr8	91051293	91052268	Inf	+	91051293	91052268	0	1	975	0	702	36609	7.04022	0	0	ENSMUST00000209203	Chd9	UTR3
13872	peak_13872	chr13	67069399	67069974	692.857	-	67069399	67069974	0	1	575	0	77	5185	7.03922	1.94701e-210	2.68702e-209	ENSMUST00000109743	Zfp708	UTR3
2749	peak_2749	chr2	181234610	181235060	114.327	-	181234610	181235060	0	1	450	0	8	783	7.03721	2.21357e-35	3.83923e-35	ENSMUST00000149417	Helz2	UTR3
3219	peak_3219	chr3	154762556	154762781	44.0801	+	154762556	154762781	0	1	225	0	3	220	7.03667	4.77023e-14	5.37751e-14	ENSMUST00000098496	Erich3	LastExon
12975	peak_12975	chr12	100061495	100061745	48.6872	+	100061495	100061745	0	1	250	0	3	248	7.03586	1.89246e-15	2.20641e-15	ENSMUST00000049788	Kcnk13	LastExon
4665	peak_4665	chr4	134278201	134279395	Inf	-	134278201	134279395	0	2	915,35	0,1159	413	21329	7.03096	0	0	ENSMUST00000105876	Pdik1l	UTR3
959	peak_959	chr1	139237132	139237432	190.794	-	139237132	139237432	0	1	300	0	16	921	7.0278	1.55546e-58	3.67437e-58	ENSMUST00000198445	Crb1	Exon
17046	peak_17046	chr18	37497896	37498646	276.827	+	37497896	37498646	0	1	750	0	28	1484	7.02603	1.46272e-84	4.64258e-84	ENSMUST00000059571	Pcdhb19	LastExon
6675	peak_6675	chr6	59353085	59353285	60.8836	-	59353085	59353285	0	1	200	0	4	269	7.0246	3.70225e-19	4.70124e-19	ENSMUST00000051065	Gprin3	LastExon
13587	peak_13587	chr13	67363778	67363903	31.0104	+	67363778	67363903	0	1	125	0	1	78	7.024	4.46098e-10	4.62301e-10	ENSMUST00000057070	Zfp456	UTR3
13100	peak_13100	chr12	17174501	17174701	35.588	-	17174501	17174701	0	1	200	0	2	216	7.02376	1.82057e-11	1.93624e-11	ENSMUST00000170580	Kcnf1	UTR3
15913	peak_15913	chr16	76290949	76291874	Inf	-	76290949	76291874	0	1	925	0	218	11260	7.02092	0	0	ENSMUST00000054178	Nrip1	UTR3
2219	peak_2219	chr2	65460142	65461467	Inf	-	65460142	65461467	0	1	1325	0	258	13039	7.0193	0	0	ENSMUST00000100069	Scn3a	UTR3
7508	peak_7508	chr7	112955361	112956236	320.224	+	112955361	112956236	0	1	875	0	28	1794	7.01593	1.08528e-97	4.00868e-97	ENSMUST00000182858	Rassf10	LastExon
6136	peak_6136	chr6	15437895	15438270	699.048	+	15437895	15438270	0	1	375	0	90	4765	7.01341	2.58811e-212	3.67804e-211	ENSMUST00000115475	Foxp2	UTR3
13867	peak_13867	chr13	67039868	67040118	375.06	-	67039868	67040118	0	1	250	0	35	2227	7.01146	2.80793e-114	1.24618e-113	ENSMUST00000167565	Zfp712	UTR3
15432	peak_15432	chr16	12268503	12268803	118.948	+	12268503	12268803	0	1	300	0	10	556	7.00952	8.79271e-37	1.56001e-36	ENSMUST00000023138	Shisa9	UTR3
8516	peak_8516	chr8	60671292	60671867	142.043	+	60671292	60671867	0	1	575	0	47	3046	7.00642	8.8575e-44	1.74113e-43	ENSMUST00000034066	Mfap3l	LastExon
10294	peak_10294	chr9	82870908	82871808	Inf	-	82870908	82871808	0	1	900	0	2141	111553	7.00571	0	0	ENSMUST00000190774	Phip	UTR3
5778	peak_5778	chr5	106452688	106452788	34.8172	-	106452688	106452788	0	1	100	0	2	141	7.00435	3.1204e-11	3.30356e-11	ENSMUST00000086795	Barhl2	UTR3
7663	peak_7663	chr7	144843135	144843235	28.5087	+	144843135	144843235	0	1	100	0	1	106	7.00257	2.56149e-09	2.61826e-09	ENSMUST00000105898	Fgf3	UTR3
18304	peak_18304	chrX	136033941	136034316	291.499	+	136033941	136034316	0	1	375	0	27	1373	7.00254	5.30302e-89	1.77795e-88	ENSMUST00000057625	Arxes1	LastExon
6379	peak_6379	chr6	108658660	108658810	31.347	+	108658660	108658810	0	1	150	0	1	122	6.99998	3.52719e-10	3.66101e-10	ENSMUST00000204397	Gm17055	UTR5
18450	peak_18450	chrX	64270309	64271009	562.504	-	64270309	64271009	0	1	700	0	62	3253	6.99981	5.50794e-171	4.67084e-170	ENSMUST00000114679	Slitrk4	UTR3
14989	peak_14989	chr15	4022760	4022810	30.451	-	4022760	4022810	0	1	50	0	1	77	6.9996	6.59865e-10	6.81294e-10	ENSMUST00000140003	BC037032	UTR3
3778	peak_3778	chr4	53786166	53786341	45.0985	+	53786166	53786341	0	1	175	0	3	207	6.9987	2.33719e-14	2.65465e-14	ENSMUST00000030124	Tal2	UTR3
17637	peak_17637	chr19	10664745	10664795	29.1439	+	10664745	10664795	0	1	50	0	1	82	6.99818	1.64385e-09	1.68584e-09	ENSMUST00000055115	Vwce	UTR3
3258	peak_3258	chr3	31208884	31209284	109.473	-	31208884	31209284	0	1	400	0	8	492	6.99735	6.56216e-34	1.11034e-33	ENSMUST00000091259	Slc7a14	UTR3
12328	peak_12328	chr11	69879439	69879789	85.5323	-	69879439	69879789	0	1	350	0	6	620	6.99637	1.20325e-26	1.78742e-26	ENSMUST00000050555	Kctd11	UTR3
1487	peak_1487	chr2	79327095	79327745	693.171	+	79327095	79327745	0	1	650	0	83	4149	6.99608	1.56134e-210	2.16117e-209	ENSMUST00000099972	Itga4	UTR3
9945	peak_9945	chr9	4419698	4420223	412.434	-	4419698	4420223	0	1	525	0	41	2141	6.99258	1.3865e-125	6.9986e-125	ENSMUST00000027020	Gria4	UTR3
3728	peak_3728	chr4	42231666	42231716	25.343	+	42231666	42231716	0	1	50	0	1	95	6.99231	2.32699e-08	2.34969e-08	ENSMUST00000169242	Gm17167	UTR5
11428	peak_11428	chr11	22519041	22519234	86.8585	+	22519041	22519234	0	1	193	0	6	380	6.99162	4.76265e-27	7.12828e-27	ENSMUST00000059319	Tmem17	UTR3
7409	peak_7409	chr7	89407625	89408575	580.013	+	89407625	89408575	0	1	950	0	73	3752	6.99156	2.78185e-176	2.5038e-175	ENSMUST00000058755	Fzd4	LastExon
10278	peak_10278	chr9	73930636	73931011	115.915	-	73930636	73931011	0	1	375	0	10	552	6.99066	7.30303e-36	1.27699e-35	ENSMUST00000075245	Unc13c	Exon
10959	peak_10959	chr10	10687858	10688308	81.9851	-	10687858	10688308	0	1	450	0	6	338	6.98997	1.43812e-25	2.08949e-25	ENSMUST00000044306	Grm1	UTR3
2925	peak_2925	chr3	84977302	84978027	Inf	+	84977302	84978027	0	1	725	0	461	23055	6.98975	0	0	ENSMUST00000151410	Fbxw7	UTR5
13949	peak_13949	chr13	78189122	78189872	Inf	-	78189122	78189872	0	1	750	0	2968	147324	6.98924	0	0	ENSMUST00000150498	Nr2f1	UTR3
16035	peak_16035	chr17	17145022	17145197	60.2315	+	17145022	17145197	0	1	175	0	4	261	6.98893	5.84292e-19	7.38781e-19	ENSMUST00000147630	Zfp97	LastExon
14370	peak_14370	chr14	84443712	84444262	509.902	+	84443712	84444262	0	1	550	0	64	3231	6.98883	4.52139e-155	3.19205e-154	ENSMUST00000071370	Pcdh17	UTR5
17424	peak_17424	chr18	66061175	66061400	161.622	-	66061175	66061400	0	1	225	0	15	936	6.98735	1.04928e-49	2.22352e-49	ENSMUST00000235872	Ccbe1	UTR3
10126	peak_10126	chr9	51057229	51057479	88.1379	-	51057229	51057479	0	1	250	0	7	377	6.98514	1.94478e-27	2.93672e-27	ENSMUST00000098782	Layn	UTR3
643	peak_643	chr1	42591070	42591370	91.91	-	42591070	42591370	0	1	300	0	7	379	6.98402	1.3955e-28	2.14944e-28	ENSMUST00000181660	Pantr1	UTR3
5561	peak_5561	chr5	20896002	20896602	Inf	-	20896002	20896602	0	1	600	0	451	22313	6.98363	0	0	ENSMUST00000196780	Rsbn1l	UTR3
14364	peak_14364	chr14	79201657	79201707	29.8673	+	79201657	79201707	0	1	50	0	1	80	6.98056	9.9231e-10	1.02103e-09	ENSMUST00000040990	Vwa8	UTR3
9046	peak_9046	chr8	45397114	45397617	72.584	-	45397114	45397617	0	2	27248	0,255	5	280	6.98014	1.03044e-22	1.41266e-22	ENSMUST00000210013	Tlr3	LastExon
4226	peak_4226	chr4	155775006	155775081	30.7995	+	155775006	155775081	0	1	75	0	1	78	6.97815	5.17168e-10	5.35089e-10	ENSMUST00000180784	Gm26840	UTR5
16832	peak_16832	chr17	85602176	85602401	34.781	-	85602176	85602401	0	1	225	0	2	170	6.97811	3.20051e-11	3.38742e-11	ENSMUST00000161146	Six3os1	UTR3
5149	peak_5149	chr5	104213117	104213167	29.4986	+	104213117	104213167	0	1	50	0	1	73	6.97768	1.28379e-09	1.31839e-09	ENSMUST00000066708	Dmp1	UTR3
7770	peak_7770	chr7	25090802	25091102	104.785	-	25090802	25091102	0	1	300	0	8	430	6.97686	1.73487e-32	2.86166e-32	ENSMUST00000108415	Pou2f2	UTR3
6626	peak_6626	chr6	40544610	40544685	29.7879	-	40544610	40544685	0	1	75	0	1	77	6.9763	1.04902e-09	1.07879e-09	ENSMUST00000216766	Olfr461	UTR3
640	peak_640	chr1	40772387	40772587	46.0662	-	40772387	40772587	0	1	200	0	3	180	6.97532	1.1869e-14	1.35738e-14	ENSMUST00000131390	Mfsd9	UTR3
14127	peak_14127	chr14	27401669	27402144	122.214	+	27401669	27402144	0	1	475	0	9	633	6.97468	8.99196e-38	1.62177e-37	ENSMUST00000224981	Arhgef3	LastExon
2248	peak_2248	chr2	75976971	75977196	56.7457	-	75976971	75977196	0	1	225	0	4	229	6.9708	6.71237e-18	8.27652e-18	ENSMUST00000099995	Ttc30a2	LastExon
10552	peak_10552	chr10	22665514	22665689	34.6105	+	22665514	22665689	0	1	175	0	2	157	6.96863	3.60456e-11	3.81246e-11	ENSMUST00000042261	Slc2a12	Exon
13314	peak_13314	chr12	100550952	100551352	435.142	-	100550952	100551352	0	1	400	0	66	3384	6.96815	1.85731e-132	1.02166e-131	ENSMUST00000221246	Rps6ka5	UTR3
17482	peak_17482	chr18	80607579	80607654	30.8583	-	80607579	80607654	0	1	75	0	1	82	6.96451	4.96359e-10	5.13731e-10	ENSMUST00000237776	Nfatc1	UTR3
13067	peak_13067	chr12	116146023	116146123	30.6039	+	116146023	116146123	0	1	100	0	1	76	6.96352	5.92914e-10	6.1278e-10	ENSMUST00000011315	Vipr2	UTR3
18312	peak_18312	chrX	140678253	140678328	30.3017	+	140678253	140678328	0	1	75	0	1	94	6.96256	7.32325e-10	7.55563e-10	ENSMUST00000128809	Mid2	LastExon
17840	peak_17840	chr19	56724496	56724696	42.9643	+	56724496	56724696	0	1	200	0	3	167	6.96241	1.0432e-13	1.16536e-13	ENSMUST00000038949	Adrb1	UTR3
6509	peak_6509	chr6	145961727	145962027	68.6789	+	145961727	145962027	0	1	300	0	5	301	6.96104	1.58075e-21	2.11633e-21	ENSMUST00000111701	Sspn	UTR3
2372	peak_2372	chr2	119520179	119520354	30.9358	-	119520179	119520354	0	1	175	0	1	113	6.95825	4.70058e-10	4.86861e-10	ENSMUST00000171024	Exd1	LastExon
8965	peak_8965	chr8	11454141	11454266	31.4547	-	11454141	11454266	0	1	125	0	1	122	6.95662	3.27194e-10	3.39778e-10	ENSMUST00000033900	Rab20	LastExon
13242	peak_13242	chr12	83213744	83213869	53.3742	-	83213744	83213869	0	1	125	0	4	248	6.95597	7.10644e-17	8.5657e-17	ENSMUST00000178756	Dpf3	UTR3
876	peak_876	chr1	128300788	128300863	33.3005	-	128300788	128300863	0	1	75	0	2	122	6.95489	9.01554e-11	9.45236e-11	ENSMUST00000073490	Lct	Exon
2188	peak_2188	chr2	52401875	52402425	Inf	-	52401875	52402425	0	1	550	0	430	21822	6.95345	0	0	ENSMUST00000036541	Arl5a	UTR3
4290	peak_4290	chr4	35707871	35708496	205.882	-	35707871	35708496	0	1	625	0	19	995	6.95004	4.22489e-63	1.05486e-62	ENSMUST00000108124	Lingo2	UTR3
1972	peak_1972	chr2	181720282	181720782	617.206	+	181720282	181720782	0	1	500	0	102	5131	6.94772	1.54519e-187	1.59404e-186	ENSMUST00000108768	Oprl1	UTR3
3135	peak_3135	chr3	122014241	122015041	Inf	+	122014241	122015041	0	1	800	0	360	19094	6.94743	0	0	ENSMUST00000198914	Arhgap29	LastExon
8971	peak_8971	chr8	13256212	13256937	Inf	-	13256212	13256937	0	1	725	0	421	26049	6.947	0	0	ENSMUST00000204673	Dcun1d2	UTR3
7832	peak_7832	chr7	29933507	29934282	745.32	-	29933507	29934282	0	1	775	0	138	6914	6.94665	2.50505e-226	4.32946e-225	ENSMUST00000108205	Zfp74	UTR3
2777	peak_2777	chr3	9280769	9281269	Inf	+	9280769	9281269	0	1	500	0	269	13303	6.94352	0	0	ENSMUST00000155203	Zbtb10	LastExon
17319	peak_17319	chr18	36017781	36018081	101.816	-	36017781	36018081	0	1	300	0	8	735	6.94279	1.3781e-31	2.23985e-31	ENSMUST00000115713	Nrg2	UTR3
16841	peak_16841	chr17	87275060	87275285	53.7732	-	87275060	87275285	0	1	225	0	4	244	6.93956	5.37546e-17	6.49609e-17	ENSMUST00000146560	4833418N02Rik	UTR3
14991	peak_14991	chr15	4025243	4025318	30.1515	-	4025243	4025318	0	1	75	0	1	77	6.93864	8.13619e-10	8.38507e-10	ENSMUST00000140003	BC037032	UTR3
10675	peak_10675	chr10	70282748	70282823	29.6514	+	70282748	70282823	0	1	75	0	1	73	6.93629	1.15376e-09	1.1859e-09	ENSMUST00000155933	Slc16a9	UTR5
7962	peak_7962	chr7	64871901	64872501	Inf	-	64871901	64872501	0	1	600	0	210	10791	6.9358	0	0	ENSMUST00000094331	Nsmce3	UTR3
3779	peak_3779	chr4	53786366	53786591	68.2688	+	53786366	53786591	0	1	225	0	5	271	6.93501	2.10542e-21	2.81211e-21	ENSMUST00000030124	Tal2	UTR3
9002	peak_9002	chr8	24438165	24438540	344.77	-	24438165	24438540	0	1	375	0	38	2010	6.93324	4.06974e-105	1.63695e-104	ENSMUST00000052622	Tcim	UTR3
1909	peak_1909	chr2	168231571	168232296	910.622	+	168231571	168232296	0	1	725	0	159	12629	6.92991	2.11189e-276	7.50889e-275	ENSMUST00000099071	Mocs3	LastExon
1742	peak_1742	chr2	133561055	133561680	190.991	+	133561055	133561680	0	1	625	0	18	921	6.92962	1.35521e-58	3.20663e-58	ENSMUST00000028836	Bmp2	LastExon
14308	peak_14308	chr14	63949059	63949584	522.697	+	63949059	63949584	0	1	525	0	65	3138	6.92944	6.0681e-159	4.49343e-158	ENSMUST00000079652	Sox7	UTR3
18124	peak_18124	chrX	12937546	12937896	174.774	+	12937546	12937896	0	1	350	0	15	740	6.92854	1.09856e-53	2.44211e-53	ENSMUST00000121924	AA414768	UTR5
18527	peak_18527	chrX	104083733	104084208	234.347	-	104083733	104084208	0	1	475	0	131	6408	6.92644	1.03306e-71	2.84844e-71	ENSMUST00000056502	Nexmif	UTR3
583	peak_583	chr1	14170203	14170828	793.283	-	14170203	14170828	0	1	625	0	112	5375	6.9247	7.5286e-241	1.57779e-239	ENSMUST00000080664	Eya1	UTR3
14444	peak_14444	chr14	20735899	20736574	Inf	-	20735899	20736574	0	1	675	0	360	20882	6.92386	0	0	ENSMUST00000080440	Camk2g	UTR3
7900	peak_7900	chr7	44581123	44581248	30.3473	-	44581123	44581248	0	1	125	0	1	88	6.92338	7.09487e-10	7.32081e-10	ENSMUST00000209101	Gm15396	UTR3
6728	peak_6728	chr6	85472623	85472723	31.5946	-	85472623	85472723	0	1	100	0	1	139	6.91888	2.9677e-10	3.08372e-10	ENSMUST00000161546	Fbxo41	UTR3
2626	peak_2626	chr2	163862925	163863200	153.672	-	163862925	163863200	0	1	275	0	13	863	6.91843	2.67956e-47	5.49812e-47	ENSMUST00000044734	Rims4	UTR3
17789	peak_17789	chr19	46005802	46006173	178.326	+	46005802	46006173	0	1	371	0	15	1014	6.91834	9.24948e-55	2.08225e-54	ENSMUST00000099393	Hps6	LastExon
5708	peak_5708	chr5	69110384	69110559	57.3732	-	69110384	69110559	0	1	175	0	4	214	6.91792	4.32604e-18	5.35716e-18	ENSMUST00000054095	Kctd8	LastExon
13701	peak_13701	chr13	9877228	9877378	55.5157	-	9877228	9877378	0	1	150	0	4	258	6.91772	1.58868e-17	1.9414e-17	ENSMUST00000187510	Chrm3	UTR3
12087	peak_12087	chr11	3646556	3647081	Inf	-	3646556	3647081	0	1	525	0	445	21395	6.91477	0	0	ENSMUST00000227137	Tug1	UTR3
16045	peak_16045	chr17	21433583	21433808	104.115	+	21433583	21433808	0	1	225	0	8	401	6.91464	2.77191e-32	4.55409e-32	ENSMUST00000167749	Zfp54	LastExon
15925	peak_15925	chr16	85887845	85899384	134.104	-	85887845	85899384	0	2	104221	0,11318	12	844	6.91326	2.24523e-41	4.27194e-41	ENSMUST00000023611	Adamts5	Exon
9202	peak_9202	chr8	87468853	87469003	32.8176	-	87468853	87469003	0	1	150	0	2	174	6.91123	1.26316e-10	1.32109e-10	ENSMUST00000211279	Cbln1	UTR3
4700	peak_4700	chr4	138720062	138720112	30.1735	-	138720062	138720112	0	1	50	0	1	105	6.91064	8.01172e-10	8.25771e-10	ENSMUST00000105809	Ubxn10	UTR3
10877	peak_10877	chr10	112455769	112455919	30.1954	+	112455769	112455919	0	1	150	0	1	79	6.91012	7.8889e-10	8.13337e-10	ENSMUST00000218445	Kcnc2	UTR5
1569	peak_1569	chr2	107295444	107295744	80.6942	+	107295444	107295744	0	1	300	0	6	338	6.91002	3.54585e-25	5.11243e-25	ENSMUST00000037012	Kcna4	LastExon
11004	peak_11004	chr10	33622708	33622933	144.224	-	33622708	33622933	0	1	225	0	12	653	6.90821	1.93593e-44	3.83868e-44	ENSMUST00000160299	Clvs2	Exon
2789	peak_2789	chr3	19227779	19240720	583.197	+	19227779	19240720	0	2	48,77	0,12864	92	6624	6.90661	3.01702e-177	2.7554e-176	ENSMUST00000141455	Gm16093	UTR5
14659	peak_14659	chr14	88467371	88467446	65.2772	-	88467371	88467446	0	1	75	0	5	279	6.90661	1.70901e-20	2.23663e-20	ENSMUST00000192557	Pcdh20	LastExon
6696	peak_6696	chr6	80021562	80022062	83.3884	-	80021562	80022062	0	1	500	0	35	1926	6.9062	5.38956e-26	7.89907e-26	ENSMUST00000130734	Gm4409	UTR3
16726	peak_16726	chr17	53679043	53679568	838.902	-	53679043	53679568	0	1	525	0	389	18081	6.90599	1.14751e-254	2.92066e-253	ENSMUST00000024736	Sgo1	Exon
13941	peak_13941	chr13	74213442	74214017	150.907	-	74213442	74214017	0	1	575	0	12	644	6.90463	1.8381e-46	3.73739e-46	ENSMUST00000109640	Ahrr	UTR3
364	peak_364	chr1	134748245	134748645	81.1535	+	134748245	134748645	0	1	400	0	6	337	6.90346	2.57343e-25	3.71844e-25	ENSMUST00000121990	Syt2	UTR3
1426	peak_1426	chr2	55594930	55595330	512.727	+	55594930	55595330	0	1	400	0	71	3353	6.90285	6.30827e-156	4.50649e-155	ENSMUST00000112632	Kcnj3	UTR3
7163	peak_7163	chr7	27750312	27750912	Inf	+	27750312	27750912	0	1	600	0	705	35132	6.90199	0	0	ENSMUST00000108336	Zfp60	UTR3
16434	peak_16434	chr17	12974548	12974873	821.341	-	12974548	12974873	0	1	325	0	120	6170	6.89756	2.37931e-249	5.64701e-248	ENSMUST00000160781	Wtap	UTR3
11735	peak_11735	chr11	77518708	77519208	113.254	+	77518708	77519208	0	1	500	0	9	616	6.89498	4.68379e-35	8.07623e-35	ENSMUST00000100807	Gm10392	UTR5
13813	peak_13813	chr13	54054060	54054135	29.847	-	54054060	54054135	0	1	75	0	1	83	6.89284	1.0066e-09	1.0355e-09	ENSMUST00000021932	Drd1	LastExon
16783	peak_16783	chr17	67844212	67844987	443.593	-	67844212	67844987	0	1	775	0	64	3167	6.88859	5.14835e-135	2.91902e-134	ENSMUST00000024840	Arhgap28	UTR3
10019	peak_10019	chr9	22247654	22247979	478.402	-	22247654	22247979	0	1	325	0	59	3019	6.88727	1.53228e-145	9.70031e-145	ENSMUST00000086281	Zfp599	UTR3
10639	peak_10639	chr10	60403376	60403551	32.2492	+	60403376	60403551	0	1	175	0	2	129	6.88685	1.87868e-10	1.9589e-10	ENSMUST00000164428	Gm17455	UTR3
4151	peak_4151	chr4	146657485	146657985	186.927	+	146657485	146657985	0	1	500	0	17	960	6.88451	2.30554e-57	5.36328e-57	ENSMUST00000130825	Zfp993	LastExon
5702	peak_5702	chr5	66301635	66302535	964.247	-	66301635	66302535	0	1	900	0	220	10214	6.88443	1.16903e-292	5.4045e-291	ENSMUST00000087256	Apbb2	UTR3
15485	peak_15485	chr16	19768931	19770306	Inf	+	19768931	19770306	0	1	1375	0	943	44491	6.88396	0	0	ENSMUST00000119468	B3gnt5	UTR5
8074	peak_8074	chr7	99813113	99813738	403.783	-	99813113	99813738	0	1	625	0	49	2587	6.88181	5.75702e-123	2.81299e-122	ENSMUST00000036331	Neu3	UTR3
4717	peak_4717	chr4	141468214	141468914	Inf	-	141468214	141468914	0	1	700	0	478	25956	6.88057	0	0	ENSMUST00000147227	Spen	UTR3
2028	peak_2028	chr2	25194490	25194665	46.0455	-	25194490	25194665	0	1	175	0	3	236	6.88041	1.20436e-14	1.37692e-14	ENSMUST00000081869	Tor4a	UTR3
4271	peak_4271	chr4	26327505	26328055	709.813	-	26327505	26328055	0	1	550	0	129	6425	6.8804	1.41423e-215	2.11295e-214	ENSMUST00000041374	Manea	UTR3
6663	peak_6663	chr6	56778723	56779898	Inf	-	56778723	56779898	0	1	1175	0	879	40496	6.87891	0	0	ENSMUST00000114321	Kbtbd2	UTR3
11549	peak_11549	chr11	58187996	58188171	43.6815	+	58187996	58188171	0	1	175	0	3	168	6.87862	6.30614e-14	7.0888e-14	ENSMUST00000119467	Gm12250	UTR5
6152	peak_6152	chr6	22254725	22255325	644.732	+	22254725	22255325	0	1	600	0	93	4465	6.87822	7.17623e-196	8.24801e-195	ENSMUST00000115383	Cped1	UTR3
5567	peak_5567	chr5	21951857	21952007	44.2746	-	21951857	21952007	0	1	150	0	3	163	6.87346	4.16124e-14	4.69923e-14	ENSMUST00000162103	Dnaja1-ps	UTR3
12377	peak_12377	chr11	76021693	76021843	44.3279	-	76021693	76021843	0	1	150	0	3	160	6.87338	4.00748e-14	4.52862e-14	ENSMUST00000021207	Rflnb	UTR3
14093	peak_14093	chr14	18036133	18036283	32.7132	+	18036133	18036283	0	1	150	0	2	117	6.87319	1.35839e-10	1.42022e-10	ENSMUST00000022304	Thrb	UTR3
15449	peak_15449	chr16	15888211	15888461	248.048	+	15888211	15888461	0	1	250	0	25	1156	6.86916	7.43696e-76	2.13923e-75	ENSMUST00000096232	Cebpd	UTR3
1429	peak_1429	chr2	58632979	58633179	44.496	+	58632979	58633179	0	1	200	0	3	170	6.86678	3.56138e-14	4.03062e-14	ENSMUST00000135737	Upp2	UTR5
1846	peak_1846	chr2	156576535	156576735	45.4396	+	156576535	156576735	0	1	200	0	3	231	6.86595	1.84169e-14	2.09568e-14	ENSMUST00000144818	Gm14168	UTR5
7235	peak_7235	chr7	41490750	41490950	113.178	+	41490750	41490950	0	1	200	0	10	503	6.86445	4.93728e-35	8.50938e-35	ENSMUST00000205995	AW146154	UTR3
5524	peak_5524	chr5	150496173	150496873	172.984	+	150496173	150496873	0	1	700	0	101	5511	6.86424	3.82049e-53	8.4446e-53	ENSMUST00000201628	Fry	UTR5
3275	peak_3275	chr3	46446146	46446871	567.078	-	46446146	46446871	0	1	725	0	88	4388	6.8636	2.27502e-172	1.96049e-171	ENSMUST00000166505	Pabpc4l	LastExon
483	peak_483	chr1	175908690	175908990	102.821	+	175908690	175908990	0	1	300	0	9	434	6.86348	6.82936e-32	1.11602e-31	ENSMUST00000039725	Exo1	UTR3
1570	peak_1570	chr2	107296544	107296844	105.989	+	107296544	107296844	0	1	300	0	9	468	6.86178	7.4771e-33	1.2417e-32	ENSMUST00000037012	Kcna4	LastExon
17204	peak_17204	chr18	77254903	77255153	105.695	+	77254903	77255153	0	1	250	0	8	465	6.85671	9.18141e-33	1.52242e-32	ENSMUST00000079618	St8sia5	UTR3
14658	peak_14658	chr14	88467146	88467346	128.5	-	88467146	88467346	0	1	200	0	12	567	6.85546	1.1179e-39	2.07797e-39	ENSMUST00000192557	Pcdh20	LastExon
15431	peak_15431	chr16	12267678	12268253	160.273	+	12267678	12268253	0	1	575	0	17	926	6.85442	2.68685e-49	5.6634e-49	ENSMUST00000023138	Shisa9	LastExon
1986	peak_1986	chr2	5298581	5298956	331.267	-	5298581	5298956	0	1	375	0	46	2228	6.85353	4.95627e-101	1.90039e-100	ENSMUST00000044009	Camk1d	UTR3
1953	peak_1953	chr2	180543488	180543663	58.1956	+	180543488	180543663	0	1	175	0	4	307	6.8523	2.43287e-18	3.02946e-18	ENSMUST00000170448	Ntsr1	UTR3
554	peak_554	chr1	193174475	193175150	484.708	+	193174475	193175150	0	1	675	0	64	3369	6.85129	1.88914e-147	1.22551e-146	ENSMUST00000110831	A130010J15Rik	LastExon
13596	peak_13596	chr13	67826478	67826978	431.917	+	67826478	67826978	0	1	500	0	45	2386	6.84952	1.75039e-131	9.5523e-131	ENSMUST00000012725	Zfp273	UTR3
6902	peak_6902	chr6	122850387	122850612	44.4286	-	122850387	122850612	0	1	225	0	3	167	6.84904	3.7344e-14	4.22336e-14	ENSMUST00000042081	C3ar1	LastExon
8511	peak_8511	chr8	54186098	54186373	241.948	+	54186098	54186373	0	1	275	0	24	1184	6.84816	5.2033e-74	1.46683e-73	ENSMUST00000033919	Vegfc	UTR3
13566	peak_13566	chr13	59128739	59129564	94.3382	+	59128739	59129564	0	1	825	0	80	3973	6.8477	2.56292e-29	3.9938e-29	ENSMUST00000079828	Ntrk2	UTR3
12271	peak_12271	chr11	60921166	60921341	55.0733	-	60921166	60921341	0	1	175	0	4	217	6.84756	2.16389e-17	2.6381e-17	ENSMUST00000123544	Map2k3os	UTR3
384	peak_384	chr1	139446920	139447570	Inf	+	139446920	139447570	0	1	650	0	433	19433	6.84752	0	0	ENSMUST00000199011	Zbtb41	UTR3
15142	peak_15142	chr15	76001542	76002017	132.723	-	76001542	76002017	0	1	475	0	11	739	6.84696	5.88471e-41	1.11251e-40	ENSMUST00000060807	Fam83h	UTR3
17021	peak_17021	chr18	37422667	37422742	26.8442	+	37422667	37422742	0	1	75	0	1	77	6.84641	8.17801e-09	8.30007e-09	ENSMUST00000053073	Pcdhb11	LastExon
9869	peak_9869	chr9	111366756	111366806	29.0063	+	111366756	111366806	0	1	50	0	1	71	6.84634	1.8095e-09	1.85449e-09	ENSMUST00000078626	Trank1	Exon
13667	peak_13667	chr13	109950955	109951980	662.677	+	109950955	109951980	0	1	1025	0	316	14948	6.84599	2.64973e-201	3.26935e-200	ENSMUST00000120664	Pde4d	LastExon
1331	peak_1331	chr2	30608614	30608839	53.6747	+	30608614	30608839	0	1	225	0	4	210	6.84384	5.75882e-17	6.95531e-17	ENSMUST00000102853	Cstad	UTR3
4699	peak_4699	chr4	138719962	138720012	30.1884	-	138719962	138720012	0	1	50	0	1	107	6.84316	7.92809e-10	8.17287e-10	ENSMUST00000105809	Ubxn10	UTR3
12832	peak_12832	chr12	58212785	58212910	29.4467	+	58212785	58212910	0	1	125	0	1	102	6.84276	1.33101e-09	1.36666e-09	ENSMUST00000110671	Sstr1	LastExon
13580	peak_13580	chr13	66008271	66008396	32.1794	+	66008271	66008396	0	1	125	0	2	133	6.84126	1.97261e-10	2.05604e-10	ENSMUST00000069489	Rybp-ps	UTR5
4244	peak_4244	chr4	3902145	3902895	700.587	-	3902145	3902895	0	1	750	0	209	9381	6.84101	8.82499e-213	1.26573e-211	ENSMUST00000003369	Plag1	UTR3
7232	peak_7232	chr7	39537726	39538251	474.43	+	39537726	39538251	0	1	525	0	50	2299	6.84097	2.43503e-144	1.52136e-143	ENSMUST00000108015	Zfp619	LastExon
359	peak_359	chr1	134040725	134040825	30.9248	+	134040725	134040825	0	1	100	0	1	135	6.84072	4.73678e-10	4.90583e-10	ENSMUST00000048183	Fmod	Exon
8719	peak_8719	chr8	104264613	104264936	313.977	+	104264613	104264936	0	1	323	0	30	2062	6.84067	8.40584e-96	3.04509e-95	ENSMUST00000098464	Cklf	UTR3
10861	peak_10861	chr10	102389037	102389212	53.0799	+	102389037	102389212	0	1	175	0	4	249	6.8387	8.72915e-17	1.0504e-16	ENSMUST00000120748	Mgat4c	LastExon
14594	peak_14594	chr14	64111224	64111399	32.258	-	64111224	64111399	0	1	175	0	2	117	6.83651	1.8671e-10	1.94705e-10	ENSMUST00000169175	Gm17116	UTR3
11387	peak_11387	chr11	3489394	3489544	32.8915	+	3489394	3489544	0	1	150	0	2	137	6.83613	1.19913e-10	1.25504e-10	ENSMUST00000151860	Pla2g3	UTR5
1764	peak_1764	chr2	148396951	148397076	32.9726	+	148396951	148397076	0	1	125	0	2	129	6.83395	1.13326e-10	1.1865e-10	NA	NA	NA
11872	peak_11872	chr11	96964130	96964505	451.989	+	96964130	96964505	0	1	375	0	57	2552	6.83378	1.48419e-137	8.6629e-137	ENSMUST00000135825	D030028A08Rik	UTR5
2696	peak_2696	chr2	168893955	168894155	45.7596	-	168893955	168894155	0	1	200	0	3	311	6.83301	1.47156e-14	1.6787e-14	ENSMUST00000109162	Zfp64	LastExon
6233	peak_6233	chr6	48678090	48678365	109.366	+	48678090	48678365	0	1	275	0	9	544	6.83201	7.06985e-34	1.19538e-33	ENSMUST00000054050	Gimap9	LastExon
2540	peak_2540	chr2	152931897	152932122	83.1336	-	152931897	152932122	0	1	225	0	6	470	6.83039	6.43917e-26	9.42553e-26	ENSMUST00000099200	Foxs1	UTR3
2258	peak_2258	chr2	84332975	84333500	315.956	-	84332975	84333500	0	1	525	0	34	1590	6.8296	2.11999e-96	7.7234e-96	ENSMUST00000099944	Calcrl	UTR3
8040	peak_8040	chr7	90468668	90469043	555.814	-	90468668	90469043	0	1	375	0	65	3076	6.82948	5.80225e-169	4.82382e-168	ENSMUST00000032843	Tmem126b	UTR3
15106	peak_15106	chr15	66782043	66782118	60.9001	-	66782043	66782118	0	1	75	0	19	937	6.8294	3.65942e-19	4.64781e-19	ENSMUST00000168589	Sla	UTR3
10309	peak_10309	chr9	87704749	87704974	225.884	-	87704749	87704974	0	1	225	0	22	1062	6.82711	3.76392e-69	1.00495e-68	ENSMUST00000034991	Tbx18	UTR3
11200	peak_11200	chr10	80832956	80833056	28.6029	-	80832956	80833056	0	1	100	0	1	71	6.82703	2.39858e-09	2.45282e-09	ENSMUST00000053986	Lingo3	UTR3
7111	peak_7111	chr7	24180830	24180905	29.1821	+	24180830	24180905	0	1	75	0	1	80	6.82637	1.60053e-09	1.64177e-09	ENSMUST00000086010	Zfp114	LastExon
9451	peak_9451	chr9	21028032	21028357	218.043	+	21028032	21028357	0	1	325	0	24	1288	6.82518	8.83815e-67	2.30363e-66	ENSMUST00000086399	Icam1	UTR3
1928	peak_1928	chr2	176238817	176239017	73.254	+	176238817	176239017	0	1	200	0	6	301	6.82176	6.44523e-23	8.87846e-23	ENSMUST00000099009	2210418O10Rik	UTR3
14412	peak_14412	chr14	7006739	7006814	31.5641	-	7006739	7006814	0	1	75	0	2	117	6.82085	3.03131e-10	3.14964e-10	ENSMUST00000170738	Gm10406	UTR3
13463	peak_13463	chr13	35969894	35970169	98.2103	+	35969894	35970169	0	1	275	0	8	411	6.81968	1.70981e-30	2.72735e-30	ENSMUST00000132661	Ppp1r3g	UTR3
2492	peak_2492	chr2	140659462	140661537	Inf	-	140659462	140661537	0	1	2075	0	1536	67327	6.81861	0	0	ENSMUST00000056760	Flrt3	UTR3
16883	peak_16883	chr18	11945130	11945255	32.8053	+	11945130	11945255	0	1	125	0	2	155	6.81486	1.27398e-10	1.33234e-10	ENSMUST00000046948	Cables1	UTR3
13834	peak_13834	chr13	58004295	58004870	321.635	-	58004295	58004870	0	1	575	0	32	1522	6.81386	4.05803e-98	1.50698e-97	ENSMUST00000160860	Klhl3	UTR3
12709	peak_12709	chr11	119343599	119343699	28.4187	-	119343599	119343699	0	1	100	0	1	73	6.81291	2.72798e-09	2.78691e-09	ENSMUST00000100172	Sgsh	UTR3
11414	peak_11414	chr11	16281947	16282522	433.389	+	16281947	16282522	0	1	575	0	48	2240	6.81036	6.2927e-132	3.44214e-131	ENSMUST00000207256	Vstm2a	UTR3
14884	peak_14884	chr15	82345507	82345632	28.8877	+	82345507	82345632	0	1	125	0	1	69	6.80883	1.96548e-09	2.01347e-09	ENSMUST00000050349	Pheta2	UTR3
18451	peak_18451	chrX	64271209	64271559	182.71	-	64271209	64271559	0	1	350	0	16	724	6.80643	4.36072e-56	9.96989e-56	ENSMUST00000114679	Slitrk4	LastExon
17406	peak_17406	chr18	61201975	61202025	43.2991	-	61201975	61202025	0	1	50	0	3	155	6.8061	8.24839e-14	9.24032e-14	ENSMUST00000148829	Slc26a2	LastExon
7420	peak_7420	chr7	96906038	96906838	Inf	+	96906038	96906838	0	1	800	0	1775	85568	6.80567	0	0	ENSMUST00000107165	Tenm4	LastExon
17488	peak_17488	chr18	80968950	80969775	Inf	-	80968950	80969775	0	1	825	0	217	10733	6.80412	0	0	ENSMUST00000235746	Sall3	UTR3
5773	peak_5773	chr5	104456162	104456462	286.458	-	104456162	104456462	0	1	300	0	29	1474	6.80063	1.77959e-87	5.854e-87	NA	NA	NA
6266	peak_6266	chr6	62379868	62380418	637.692	+	62379868	62380418	0	1	550	0	177	7780	6.80055	9.69758e-194	1.08514e-192	ENSMUST00000232648	Ccser1	LastExon
3840	peak_3840	chr4	72201347	72202197	998.8	+	72201347	72202197	0	1	850	0	230	10219	6.79972	3.85402e-303	2.14341e-301	ENSMUST00000122923	C630043F03Rik	UTR5
15958	peak_15958	chr16	94832430	94832480	28.3485	-	94832430	94832480	0	1	50	0	1	77	6.79903	2.86453e-09	2.92593e-09	ENSMUST00000232128	Kcnj6	UTR3
17375	peak_17375	chr18	46560504	46560579	29.3912	-	46560504	46560579	0	1	75	0	1	91	6.79562	1.38383e-09	1.42027e-09	ENSMUST00000036030	Tmed7	UTR3
8439	peak_8439	chr8	25754658	25768661	Inf	+	25754658	25768661	0	2	611039	0,12964	531	23785	6.79558	0	0	ENSMUST00000038498	Bag4	UTR3
4704	peak_4704	chr4	139102038	139102363	217.769	-	139102038	139102363	0	1	325	0	23	1088	6.79508	1.06978e-66	2.78562e-66	ENSMUST00000143971	Minos1	UTR3
5776	peak_5776	chr5	105272628	105272878	64.953	-	105272628	105272878	0	1	250	0	5	246	6.79506	2.14463e-20	2.80024e-20	ENSMUST00000199944	Gbp6	UTR3
16048	peak_16048	chr17	21434583	21434658	40.7648	+	21434583	21434658	0	1	75	0	3	165	6.79489	4.86847e-13	5.35255e-13	ENSMUST00000007884	Zfp54	LastExon
11285	peak_11285	chr10	100446776	100447601	Inf	-	100446776	100447601	0	1	825	0	317	13911	6.79477	0	0	ENSMUST00000058154	Tmtc3	UTR3
13118	peak_13118	chr12	31712101	31712451	333.179	-	31712101	31712451	0	1	350	0	41	1921	6.79421	1.30745e-101	5.04955e-101	ENSMUST00000236002	Gpr22	UTR5
16032	peak_16032	chr17	16972909	16973770	863.95	+	16972909	16973770	0	1	861	0	237	10447	6.79373	2.95951e-262	8.4181e-261	ENSMUST00000071374	BC002059	UTR5
11969	peak_11969	chr11	113470602	113470852	42.4493	+	113470602	113470852	0	1	250	0	3	174	6.79331	1.4946e-13	1.66532e-13	ENSMUST00000105048	Gm16487	UTR5
4365	peak_4365	chr4	55527542	55528192	227.155	-	55527542	55528192	0	1	650	0	21	944	6.79198	1.55156e-69	4.16469e-69	ENSMUST00000107619	Klf4	UTR3
3348	peak_3348	chr3	66973276	66973326	18.4772	-	66973276	66973326	0	1	50	0	2	156	6.78947	2.73808e-06	2.74044e-06	ENSMUST00000162439	Shox2	UTR3
14489	peak_14489	chr14	36878860	36879610	1009.5	-	36878860	36879610	0	1	750	0	364	16178	6.78436	2.21797e-306	1.29134e-304	ENSMUST00000182797	Ccser2	UTR3
13500	peak_13500	chr13	45966304	45966500	116.731	+	45966304	45966500	0	1	196	0	10	461	6.78412	4.13445e-36	7.25456e-36	ENSMUST00000038032	5033430I15Rik	UTR5
13719	peak_13719	chr13	21467246	21467471	43.2569	-	21467246	21467471	0	1	225	0	3	153	6.78354	8.49594e-14	9.5142e-14	ENSMUST00000068235	Nkapl	UTR3
16186	peak_16186	chr17	33104730	33105930	809.081	+	33104730	33105930	0	1	1200	0	232	10032	6.78332	1.21722e-245	2.76898e-244	ENSMUST00000131722	Zfp563	LastExon
4095	peak_4095	chr4	135705599	135705649	29.397	+	135705599	135705649	0	1	50	0	1	107	6.78321	1.37816e-09	1.41461e-09	ENSMUST00000074408	Ifnlr1	LastExon
10568	peak_10568	chr10	36832982	36833232	69.9623	+	36832982	36833232	0	1	250	0	7	333	6.78289	6.44277e-22	8.69443e-22	ENSMUST00000168572	Hs3st5	LastExon
17058	peak_17058	chr18	37518226	37518313	40.7068	+	37518226	37518313	0	1	87	0	3	164	6.78216	5.06996e-13	5.57212e-13	ENSMUST00000061405	Pcdhb21	UTR3
16142	peak_16142	chr17	28228384	28228608	110.973	+	28228384	28228608	0	1	224	0	9	474	6.78002	2.2995e-34	3.92398e-34	ENSMUST00000002327	Def6	UTR3
3856	peak_3856	chr4	89679510	89688207	27.2794	+	89679510	89688207	0	2	40,10	0,8687	1	72	6.77988	6.03618e-09	6.13865e-09	ENSMUST00000131576	Dmrta1	UTR5
17163	peak_17163	chr18	64388122	64388797	120.697	+	64388122	64388797	0	1	675	0	31	1399	6.77969	2.59087e-37	4.64094e-37	ENSMUST00000175965	Onecut2	UTR3
16254	peak_16254	chr17	42503926	42504051	32.434	+	42503926	42504051	0	1	125	0	2	110	6.7794	1.65118e-10	1.72343e-10	ENSMUST00000232968	Ptchd4	UTR3
13448	peak_13448	chr13	31630640	31631015	423.593	+	31630640	31631015	0	1	375	0	53	2521	6.77923	5.80718e-129	3.06064e-128	ENSMUST00000042054	Foxf2	LastExon
17357	peak_17357	chr18	40205889	40206264	715.996	-	40205889	40206264	0	1	375	0	127	5807	6.77891	1.8999e-217	2.90855e-216	ENSMUST00000025364	Yipf5	UTR3
4858	peak_4858	chr5	13599220	13600295	Inf	+	13599220	13600295	0	1	1075	0	499	21487	6.77843	0	0	ENSMUST00000030714	Sema3a	LastExon
16487	peak_16487	chr17	24404648	24404973	464.38	-	24404648	24404973	0	1	325	0	75	3253	6.77521	2.65438e-141	1.61297e-140	ENSMUST00000181014	D330041H03Rik	UTR3
16847	peak_16847	chr17	87991583	87992083	Inf	-	87991583	87992083	0	1	500	0	1039	47294	6.77515	0	0	ENSMUST00000135639	Fbxo11	UTR3
13244	peak_13244	chr12	83214294	83215144	228.796	-	83214294	83215144	0	1	850	0	27	1386	6.77285	4.94036e-70	1.33552e-69	ENSMUST00000178756	Dpf3	UTR3
3622	peak_3622	chr3	152821105	152821655	338.572	-	152821105	152821655	0	1	550	0	54	2485	6.77149	3.04837e-103	1.20123e-102	ENSMUST00000044278	St6galnac5	UTR3
642	peak_642	chr1	42590770	42591045	240.605	-	42590770	42591045	0	1	275	0	23	1118	6.76923	1.32568e-73	3.72193e-73	ENSMUST00000181660	Pantr1	UTR3
17054	peak_17054	chr18	37506363	37506863	204.014	+	37506363	37506863	0	1	500	0	20	986	6.76817	1.55295e-62	3.8526e-62	ENSMUST00000052179	Pcdhb20	LastExon
10956	peak_10956	chr10	9760246	9760846	898.216	-	9760246	9760846	0	1	600	0	200	8853	6.76713	1.22488e-272	4.07512e-271	ENSMUST00000151435	Stxbp5	UTR3
17682	peak_17682	chr19	25678063	25678188	31.7067	+	25678063	25678188	0	1	125	0	2	131	6.76619	2.74456e-10	2.85329e-10	ENSMUST00000053068	Dmrt2	LastExon
396	peak_396	chr1	146901588	146902013	104.776	+	146901588	146902013	0	1	425	0	9	462	6.76583	1.74579e-32	2.87942e-32	ENSMUST00000128345	Brinp3	UTR3
14694	peak_14694	chr14	108913065	108913465	602.815	-	108913065	108913465	0	1	400	0	309	13851	6.76577	3.51888e-183	3.4253e-182	ENSMUST00000100322	Slitrk1	LastExon
10803	peak_10803	chr10	85658434	85658984	308.321	+	85658434	85658984	0	1	550	0	35	1681	6.76491	4.31848e-94	1.53486e-93	ENSMUST00000105306	Btbd11	UTR3
2802	peak_2802	chr3	30818547	30819172	Inf	+	30818547	30819172	0	1	625	0	2007	86777	6.76473	0	0	ENSMUST00000195072	Sec62	UTR5
2811	peak_2811	chr3	32519652	32520677	Inf	+	32519652	32520677	0	1	1025	0	570	24687	6.76206	0	0	ENSMUST00000193789	Zfp639	LastExon
11615	peak_11615	chr11	62265783	62265933	32.1037	+	62265783	62265933	0	1	150	0	2	114	6.76203	2.08001e-10	2.16689e-10	ENSMUST00000018644	Adora2b	UTR3
958	peak_958	chr1	139198330	139198555	51.5869	-	139198330	139198555	0	1	225	0	4	209	6.76109	2.48344e-16	2.95668e-16	ENSMUST00000199479	Crb1	UTR3
13805	peak_13805	chr13	52967208	52967883	764.092	-	52967208	52967883	0	1	675	0	134	6621	6.7602	5.22144e-232	9.67005e-231	ENSMUST00000071065	Nfil3	UTR3
1796	peak_1796	chr2	153007291	153007341	28.8245	+	153007291	153007341	0	1	50	0	1	84	6.75736	2.05419e-09	2.10352e-09	ENSMUST00000165343	Ttll9	UTR3
1134	peak_1134	chr1	183086263	183086763	798.316	-	183086263	183086763	0	1	500	0	155	7756	6.75636	2.2418e-242	4.81741e-241	ENSMUST00000195372	Disp1	UTR3
2223	peak_2223	chr2	66273155	66273780	188.12	-	66273155	66273780	0	1	625	0	17	805	6.75574	1.00414e-57	2.34497e-57	ENSMUST00000156865	Scn1a	UTR3
2185	peak_2185	chr2	51131862	51132587	Inf	-	51131862	51132587	0	1	725	0	1444	60602	6.7557	0	0	ENSMUST00000154545	Rnd3	UTR3
8601	peak_8601	chr8	72320909	72321309	499.533	+	72320909	72321309	0	1	400	0	57	2818	6.75329	6.20502e-152	4.22381e-151	ENSMUST00000067912	Klf2	LastExon
597	peak_597	chr1	23369673	23370323	985.021	-	23369673	23370323	0	1	650	0	228	9552	6.75056	5.80559e-299	3.01292e-297	ENSMUST00000186064	Ogfrl1	UTR3
577	peak_577	chr1	12871523	12872223	971.186	-	12871523	12872223	0	1	700	0	254	11976	6.74861	9.03312e-295	4.40565e-293	ENSMUST00000115402	Slco5a1	UTR3
875	peak_875	chr1	128300688	128300763	27.0391	-	128300688	128300763	0	1	75	0	1	66	6.74392	7.13887e-09	7.25135e-09	ENSMUST00000073490	Lct	Exon
8819	peak_8819	chr8	111669512	111670037	905.133	+	111669512	111670037	0	1	525	0	333	14312	6.74356	9.77482e-275	3.37249e-273	ENSMUST00000212206	Zfp1	UTR3
14719	peak_14719	chr15	6580895	6580945	29.7786	+	6580895	6580945	0	1	50	0	1	130	6.74206	1.0559e-09	1.0858e-09	ENSMUST00000159714	Fyb	UTR5
15698	peak_15698	chr16	96316075	96316325	54.398	+	96316075	96316325	0	1	250	0	4	239	6.74076	3.4733e-17	4.21269e-17	ENSMUST00000099497	B3galt5	LastExon
17115	peak_17115	chr18	51302967	51303342	98.6266	+	51302967	51303342	0	1	375	0	8	401	6.7406	1.27777e-30	2.0438e-30	ENSMUST00000116639	Prr16	LastExon
14986	peak_14986	chr15	3319534	3320684	387.534	-	3319534	3320684	0	1	1150	0	43	1847	6.73732	4.74223e-118	2.19128e-117	ENSMUST00000161561	Ghr	UTR3
3501	peak_3501	chr3	104457458	104457908	829.387	-	104457458	104457908	0	1	450	0	216	9710	6.73674	8.75744e-252	2.1356e-250	ENSMUST00000196518	Lrig2	UTR3
14763	peak_14763	chr15	34355573	34355648	27.2536	+	34355573	34355648	0	1	75	0	1	76	6.73521	6.14707e-09	6.24971e-09	ENSMUST00000179647	9430069I07Rik	Exon
8065	peak_8065	chr7	98144534	98144709	32.4316	-	98144534	98144709	0	1	175	0	2	196	6.7352	1.65403e-10	1.7263e-10	ENSMUST00000098281	Omp	UTR3
13777	peak_13777	chr13	45556907	45557432	586.136	-	45556907	45557432	0	1	525	0	79	4555	6.73182	3.89418e-178	3.59349e-177	ENSMUST00000180110	Atxn1	UTR3
13542	peak_13542	chr13	55213359	55233978	Inf	+	55213359	55233978	0	2	791,84	0,20535	1919	79962	6.73167	0	0	ENSMUST00000224338	Nsd1	UTR5
1271	peak_1271	chr2	25577030	25577180	32.2133	+	25577030	25577180	0	1	150	0	2	215	6.73076	1.92653e-10	2.00835e-10	ENSMUST00000181730	Gm26702	UTR5
3207	peak_3207	chr3	146019900	146020325	406.568	+	146019900	146020325	0	1	425	0	55	2359	6.73075	8.27745e-124	4.08198e-123	ENSMUST00000200546	Syde2	LastExon
9277	peak_9277	chr8	109248716	109250108	681.791	-	109248716	109250108	0	1	1392	0	441	18555	6.73054	4.33958e-207	5.7586e-206	ENSMUST00000180524	D030068K23Rik	Intron
11045	peak_11045	chr10	44439526	44439576	31.4092	-	44439526	44439576	0	1	50	0	2	108	6.72927	3.37768e-10	3.50661e-10	ENSMUST00000105490	Prdm1	UTR3
2886	peak_2886	chr3	61007218	61007443	54.1303	+	61007218	61007443	0	1	225	0	4	191	6.729	4.1895e-17	5.07178e-17	ENSMUST00000193201	P2ry1	UTR3
2897	peak_2897	chr3	65531350	65546105	Inf	+	65531350	65546105	0	2	834,66	0,14689	307	12943	6.72866	0	0	ENSMUST00000047906	Tiparp	Exon
9237	peak_9237	chr8	99147960	99148085	31.1515	-	99147960	99148085	0	1	125	0	2	106	6.72765	4.04204e-10	4.19235e-10	ENSMUST00000137501	Gm15681	UTR3
2221	peak_2221	chr2	66272505	66272780	151.923	-	66272505	66272780	0	1	275	0	15	646	6.7239	9.05598e-47	1.84759e-46	ENSMUST00000077489	Scn1a	UTR3
10984	peak_10984	chr10	25992810	25993760	450.277	-	25992810	25993760	0	1	950	0	53	2495	6.72351	4.89277e-137	2.83891e-136	ENSMUST00000066049	Tmem200a	UTR3
12694	peak_12694	chr11	118448452	118448527	29.5728	-	118448452	118448527	0	1	75	0	1	108	6.72163	1.21886e-09	1.25226e-09	ENSMUST00000142751	Gm11747	UTR3
5053	peak_5053	chr5	63898174	63898324	32.5066	+	63898174	63898324	0	1	150	0	2	187	6.72	1.56934e-10	1.63883e-10	ENSMUST00000199667	0610040J01Rik	LastExon
16996	peak_16996	chr18	37302723	37302773	28.5588	+	37302723	37302773	0	1	50	0	1	132	6.71987	2.47363e-09	2.52901e-09	ENSMUST00000051754	Pcdhb3	LastExon
2304	peak_2304	chr2	93835366	93835666	362.952	-	93835366	93835666	0	1	300	0	44	2074	6.71611	1.28775e-110	5.50182e-110	ENSMUST00000041593	Accs	UTR3
7762	peak_7762	chr7	24229097	24229597	214.29	-	24229097	24229597	0	1	500	0	23	1036	6.71604	1.20626e-65	3.10627e-65	ENSMUST00000037448	Zfp109	LastExon
1552	peak_1552	chr2	101696711	101697761	Inf	+	101696711	101697761	0	1	1050	0	524	24332	6.71404	0	0	ENSMUST00000004949	Traf6	LastExon
11330	peak_11330	chr10	121264248	121264548	193.713	-	121264248	121264548	0	1	300	0	19	814	6.71389	2.02756e-59	4.85857e-59	ENSMUST00000064107	Tbc1d30	UTR3
3114	peak_3114	chr3	106732227	106732502	290.192	+	106732227	106732502	0	1	275	0	36	1553	6.7135	1.32033e-88	4.40135e-88	ENSMUST00000106737	Lrif1	UTR5
414	peak_414	chr1	156065018	156065993	770.304	+	156065018	156065993	0	1	975	0	266	12114	6.71286	6.79735e-234	1.30424e-232	ENSMUST00000060404	Tor1aip2	LastExon
3562	peak_3562	chr3	122968626	122968826	53.8448	-	122968626	122968826	0	1	200	0	4	188	6.71258	5.11389e-17	6.18159e-17	ENSMUST00000200188	Usp53	UTR3
3927	peak_3927	chr4	111459993	111460293	269.114	+	111459993	111460293	0	1	300	0	34	1428	6.71124	3.14862e-82	9.74129e-82	ENSMUST00000139876	Bend5	UTR3
11497	peak_11497	chr11	48849785	48849960	32.3977	+	48849785	48849960	0	1	175	0	2	201	6.71074	1.69368e-10	1.76739e-10	ENSMUST00000131270	Trim7	UTR5
18413	peak_18413	chrX	36610788	36611013	136.78	-	36610788	36611013	0	1	225	0	14	604	6.70992	3.46975e-42	6.68511e-42	ENSMUST00000051906	Akap17b	UTR3
11700	peak_11700	chr11	75266419	75266744	77.2301	+	75266419	75266744	0	1	325	0	6	322	6.70948	3.99258e-24	5.64169e-24	ENSMUST00000102514	Rtn4rl1	UTR3
2610	peak_2610	chr2	160906511	160906561	27.9468	-	160906511	160906561	0	1	50	0	1	82	6.70904	3.79139e-09	3.86525e-09	ENSMUST00000057169	Emilin3	UTR3
4634	peak_4634	chr4	132459155	132459980	704.115	-	132459155	132459980	0	1	825	0	202	9075	6.70862	7.53369e-214	1.09742e-212	ENSMUST00000102567	Med18	UTR3
17278	peak_17278	chr18	24013801	24014376	Inf	-	24013801	24014376	0	1	575	0	812	35609	6.70782	0	0	ENSMUST00000153337	Zfp24	UTR3
18365	peak_18365	chrX	169369621	169369996	298.697	+	169369621	169369996	0	1	375	0	30	1255	6.7078	3.52754e-91	1.21101e-90	ENSMUST00000119987	BC022960	UTR5
13419	peak_13419	chr13	21368871	21369821	Inf	+	21368871	21369821	0	1	950	0	275	11368	6.70642	0	0	ENSMUST00000099720	Zscan12	LastExon
16566	peak_16566	chr17	31844372	31844447	31.982	-	31844372	31844447	0	1	75	0	2	146	6.70544	2.26468e-10	2.35756e-10	ENSMUST00000024839	Sik1	UTR3
15196	peak_15196	chr15	78119093	78119393	198.332	-	78119093	78119393	0	1	300	0	23	1070	6.70295	8.13669e-61	1.97801e-60	ENSMUST00000019290	Cacng2	UTR5
8964	peak_8964	chr8	11453941	11453991	28.2415	-	11453941	11453991	0	1	50	0	1	86	6.70217	3.08712e-09	3.15105e-09	ENSMUST00000033900	Rab20	UTR3
6342	peak_6342	chr6	88205704	88205879	53.7489	+	88205704	88205879	0	1	175	0	4	189	6.70154	5.46803e-17	6.60667e-17	ENSMUST00000015197	Gata2	UTR3
15465	peak_15465	chr16	17483917	17484517	Inf	+	17483917	17484517	0	1	600	0	530	22931	6.70126	0	0	ENSMUST00000006293	Crkl	UTR3
17113	peak_17113	chr18	50090612	50091137	705.781	+	50090612	50091137	0	1	525	0	148	6046	6.6998	2.34936e-214	3.45742e-213	ENSMUST00000148159	Tnfaip8	LastExon
16632	peak_16632	chr17	34977798	34978098	108.61	-	34977798	34978098	0	1	300	0	9	478	6.698	1.19808e-33	2.01839e-33	ENSMUST00000151136	Gm10501	UTR3
14366	peak_14366	chr14	79452784	79453434	266.846	+	79452784	79453434	0	1	650	0	37	1638	6.69769	1.5297e-81	4.69057e-81	ENSMUST00000100359	Kbtbd6	LastExon
5389	peak_5389	chr5	135064955	135065365	639.24	+	135064955	135065365	0	1	410	0	93	4131	6.69439	3.29815e-194	3.71062e-193	ENSMUST00000071263	Dnajc30	UTR3
11784	peak_11784	chr11	82961314	82961514	42.1566	+	82961314	82961514	0	1	200	0	3	152	6.69431	1.83594e-13	2.03992e-13	ENSMUST00000108157	Slfn5	LastExon
7971	peak_7971	chr7	66647539	66659963	923.251	-	66647539	66659963	0	2	386314	0,12110	264	10973	6.69415	3.12373e-280	1.1853e-278	ENSMUST00000207785	Asb7	UTR3
2706	peak_2706	chr2	172042414	172042589	30.9658	-	172042414	172042589	0	1	175	0	2	193	6.6938	4.60246e-10	4.7683e-10	ENSMUST00000087950	Cbln4	UTR5
790	peak_790	chr1	85941786	85941836	28.7103	-	85941786	85941836	0	1	50	0	1	92	6.69332	2.22472e-09	2.2769e-09	ENSMUST00000086975	Gpr55	LastExon
16858	peak_16858	chr18	3512139	3512639	481.79	+	3512139	3512639	0	1	500	0	57	2454	6.69214	1.44483e-146	9.26315e-146	ENSMUST00000025075	Bambi	LastExon
11006	peak_11006	chr10	33943740	33949408	757.61	-	33943740	33949408	0	2	20480	0,5188	149	6310	6.69133	4.78285e-230	8.64299e-229	ENSMUST00000218222	Zup1	LastExon
1248	peak_1248	chr2	21827527	21827652	27.116	+	21827527	21827652	0	1	125	0	1	64	6.68977	6.76648e-09	6.87497e-09	ENSMUST00000055946	Gpr158	LastExon
18282	peak_18282	chrX	119928531	119929106	299.584	+	119928531	119929106	0	1	575	0	39	1593	6.68925	1.90016e-91	6.54862e-91	ENSMUST00000113366	Pabpc5	LastExon
4382	peak_4382	chr4	59771836	59773917	899.094	-	59771836	59773917	0	2	623,2	0,2079	451	19571	6.68867	6.64124e-273	2.21743e-271	ENSMUST00000107526	Inip	UTR3
1404	peak_1404	chr2	48899608	48900308	Inf	+	48899608	48900308	0	1	700	0	510	20925	6.68743	0	0	ENSMUST00000156681	Acvr2a	UTR5
17722	peak_17722	chr19	40739222	40739622	153.921	+	40739222	40739622	0	1	400	0	14	647	6.68693	2.25233e-47	4.62557e-47	ENSMUST00000112231	Entpd1	UTR3
2481	peak_2481	chr2	132373524	132373624	31.3376	-	132373524	132373624	0	1	100	0	2	137	6.68559	3.55082e-10	3.68512e-10	ENSMUST00000110156	Prokr2	LastExon
6232	peak_6232	chr6	48658996	48659071	31.2294	+	48658996	48659071	0	1	75	0	2	108	6.68437	3.82847e-10	3.97194e-10	ENSMUST00000078223	Gimap8	UTR3
15992	peak_15992	chr17	6038010	6038185	83.1646	+	6038010	6038185	0	1	175	0	7	364	6.68379	6.30068e-26	9.22498e-26	ENSMUST00000154114	Synj2	UTR3
6927	peak_6927	chr6	126737204	126737604	82.1156	-	126737204	126737604	0	1	400	0	34	1632	6.68323	1.31297e-25	1.9087e-25	ENSMUST00000112242	Kcna6	UTR3
15080	peak_15080	chr15	56669976	56681888	107.869	-	56669976	56681888	0	2	14311	0,11601	10	437	6.68185	2.01043e-33	3.37506e-33	ENSMUST00000050544	Has2	Exon
2885	peak_2885	chr3	61004419	61006968	89.2963	+	61004419	61006968	0	2	180,70	0,2479	8	348	6.68123	8.6626e-28	1.31567e-27	ENSMUST00000193943	P2ry1	LastExon
2405	peak_2405	chr2	121461909	121461959	26.9418	-	121461909	121461959	0	1	50	0	1	62	6.68008	7.64091e-09	7.75707e-09	ENSMUST00000056732	Mfap1b	UTR3
10317	peak_10317	chr9	89601048	89601123	28.201	-	89601048	89601123	0	1	75	0	1	80	6.67971	3.17582e-09	3.24071e-09	ENSMUST00000191465	Minar1	Exon
13905	peak_13905	chr13	67590392	67590492	41.9	-	67590392	67590492	0	1	100	0	3	161	6.6756	2.19717e-13	2.43692e-13	ENSMUST00000223599	Zfp729b	UTR3
6921	peak_6921	chr6	126639562	126639962	122.438	-	126639562	126639962	0	1	400	0	12	570	6.67337	7.68871e-38	1.38847e-37	NA	NA	NA
14798	peak_14798	chr15	60828720	60828795	26.7405	+	60828720	60828795	0	1	75	0	1	65	6.67329	8.79217e-09	8.91903e-09	ENSMUST00000181910	9930014A18Rik	UTR5
16930	peak_16930	chr18	34317711	34318711	Inf	+	34317711	34318711	0	1	1000	0	2058	89431	6.6725	0	0	ENSMUST00000115781	Apc	LastExon
4585	peak_4585	chr4	127047543	127047818	572.828	-	127047543	127047818	0	1	275	0	96	4063	6.67244	4.15224e-174	3.64392e-173	ENSMUST00000152607	Zmym1	UTR3
14478	peak_14478	chr14	31487637	31493857	Inf	-	31487637	31493857	0	3	104135261	0,4684,5959	495	19686	6.67018	0	0	ENSMUST00000227852	Mettl6	UTR3
14903	peak_14903	chr15	87757361	87758336	Inf	+	87757361	87758336	0	1	975	0	392	21070	6.66936	0	0	ENSMUST00000068088	Fam19a5	UTR3
15435	peak_15435	chr16	13147937	13148437	499.912	+	13147937	13148437	0	1	500	0	73	4568	6.66689	4.76589e-152	3.24774e-151	ENSMUST00000129049	Ercc4	UTR3
11671	peak_11671	chr11	71025218	71025968	671.053	+	71025218	71025968	0	1	750	0	463	18342	6.66583	7.74657e-204	9.8382e-203	ENSMUST00000048807	Mis12	LastExon
6030	peak_6030	chr5	138976863	138977138	311.236	-	138976863	138977138	0	1	275	0	34	1410	6.66508	5.66447e-95	2.03539e-94	ENSMUST00000110896	Pdgfa	UTR3
334	peak_334	chr1	132018017	132023890	Inf	+	132018017	132023890	0	3	445117338	0,1332,5535	502	22619	6.66476	0	0	ENSMUST00000146432	Elk4	LastExon
13480	peak_13480	chr13	40958903	40959328	195.826	+	40958903	40959328	0	1	425	0	21	872	6.66395	4.65505e-60	1.12313e-59	ENSMUST00000153685	A730081D07Rik	UTR3
12349	peak_12349	chr11	70986490	70987215	941.12	-	70986490	70987215	0	1	725	0	252	10837	6.66093	1.18733e-285	4.94881e-284	ENSMUST00000124464	Dhx33	UTR3
1543	peak_1543	chr2	92953747	92953847	30.3727	+	92953747	92953847	0	1	100	0	2	120	6.65828	6.96995e-10	7.19311e-10	ENSMUST00000028648	Syt13	UTR3
956	peak_956	chr1	136845408	136845458	26.185	-	136845408	136845458	0	1	50	0	1	64	6.65776	1.29545e-08	1.31079e-08	ENSMUST00000192357	Nr5a2	UTR3
13526	peak_13526	chr13	52645930	52646655	182.88	+	52645930	52646655	0	1	725	0	18	936	6.65761	3.87516e-56	8.86411e-56	ENSMUST00000055087	Syk	UTR3
412	peak_412	chr1	156051370	156051995	Inf	+	156051370	156051995	0	1	625	0	813	33238	6.65692	0	0	ENSMUST00000097526	Tor1aip2	UTR5
18236	peak_18236	chrX	99821345	99845432	383.421	+	99821345	99845432	0	2	581,44	0,24043	47	4814	6.65691	8.30412e-117	3.79108e-116	ENSMUST00000096363	Tmem28	Exon
8458	peak_8458	chr8	31237726	31260831	551.521	+	31237726	31260831	0	2	68932	0,22173	163	6475	6.65663	1.1552e-167	9.45213e-167	ENSMUST00000161502	Fut10	LastExon
17022	peak_17022	chr18	37435970	37436145	42.3595	+	37435970	37436145	0	1	175	0	3	157	6.65594	1.59176e-13	1.77221e-13	ENSMUST00000193015	Gm37446	UTR3
3281	peak_3281	chr3	51255764	51256714	Inf	-	51255764	51256714	0	1	950	0	1375	55134	6.65541	0	0	ENSMUST00000163748	Elf2	UTR3
3214	peak_3214	chr3	152787058	152787458	250.452	+	152787058	152787458	0	1	400	0	29	1170	6.65423	1.39114e-76	4.03965e-76	ENSMUST00000159899	Pigk	UTR3
17135	peak_17135	chr18	59410315	59410440	45.4069	+	59410315	59410440	0	1	125	0	4	182	6.6535	1.88438e-14	2.14373e-14	ENSMUST00000080721	Chsy3	LastExon
5822	peak_5822	chr5	113613303	113613778	175.454	-	113613303	113613778	0	1	475	0	16	965	6.65266	6.84156e-54	1.52452e-53	ENSMUST00000047936	Cmklr1	UTR3
15786	peak_15786	chr16	20725432	20725507	28.6252	-	20725432	20725507	0	1	75	0	1	118	6.65257	2.36134e-09	2.41514e-09	ENSMUST00000232217	Thpo	LastExon
6292	peak_6292	chr6	80021838	80022263	56.6759	+	80021838	80022263	0	1	425	0	43	1968	6.65095	7.04971e-18	8.68672e-18	ENSMUST00000130734	Gm4409	UTR3
13202	peak_13202	chr12	75632243	75632718	413.92	-	75632243	75632718	0	1	475	0	56	2351	6.65067	4.91761e-126	2.49782e-125	ENSMUST00000187307	Wdr89	UTR3
3662	peak_3662	chr4	13889615	13890665	804.072	+	13889615	13890665	0	1	1050	0	599	23873	6.65016	4.00025e-244	8.91491e-243	ENSMUST00000098256	Runx1t1	LastExon
3687	peak_3687	chr4	28821026	28870564	Inf	+	28821026	28870564	0	2	642,8	0,49530	647	25881	6.64989	0	0	ENSMUST00000149030	Epha7	UTR5
1551	peak_1551	chr2	97629465	97631215	503.546	+	97629465	97631215	0	1	1750	0	235	9333	6.64876	3.79501e-153	2.61579e-152	ENSMUST00000059049	Lrrc4c	LastExon
15813	peak_15813	chr16	31428025	31428300	144.322	-	31428025	31428300	0	1	275	0	14	621	6.64846	1.80848e-44	3.58712e-44	ENSMUST00000182690	Gm15743	UTR3
1024	peak_1024	chr1	158246320	158246970	190.122	-	158246320	158246970	0	1	650	0	181	9761	6.6482	2.48602e-58	5.857e-58	ENSMUST00000195271	Brinp2	UTR3
11031	peak_11031	chr10	42185765	42196362	1008.23	-	42185765	42196362	0	2	530,95	0,10502	204	8940	6.64369	5.40964e-306	3.11453e-304	ENSMUST00000056974	Foxo3	UTR3
717	peak_717	chr1	64794115	64794815	355.649	-	64794115	64794815	0	1	700	0	44	1938	6.64251	2.08077e-108	8.6921e-108	ENSMUST00000187188	Plekhm3	UTR3
15066	peak_15066	chr15	50660476	50661426	756.088	-	50660476	50661426	0	1	950	0	353	13928	6.64152	1.38464e-229	2.48289e-228	ENSMUST00000077935	Trps1	UTR3
8253	peak_8253	chr7	127607955	127608855	934.607	-	127607955	127608855	0	1	900	0	495	22022	6.64095	1.14087e-283	4.52245e-282	ENSMUST00000084564	Zfp629	UTR3
14709	peak_14709	chr14	123979956	123980256	173.67	-	123979956	123980256	0	1	300	0	19	767	6.64083	2.36971e-53	5.24971e-53	ENSMUST00000026631	Fgf14	UTR3
18528	peak_18528	chrX	104084283	104084483	432.148	-	104084283	104084483	0	1	200	0	85	3454	6.64079	1.49069e-131	8.13979e-131	ENSMUST00000056502	Nexmif	LastExon
18288	peak_18288	chrX	133687779	133701618	172.897	+	133687779	133701618	0	2	57,93	0,13746	21	846	6.64022	4.059e-53	8.96967e-53	ENSMUST00000181867	Gm26851	UTR5
2210	peak_2210	chr2	63972606	63972656	29.2643	-	63972606	63972656	0	1	50	0	2	110	6.63908	1.51147e-09	1.55084e-09	ENSMUST00000131615	Fign	UTR3
12412	peak_12412	chr11	78750506	78751056	796.949	-	78750506	78751056	0	1	550	0	186	7935	6.63866	5.83125e-242	1.24304e-240	ENSMUST00000059468	Ccnq	UTR3
18071	peak_18071	chr19	56913160	56913360	62.9708	-	56913160	56913360	0	1	200	0	5	235	6.63678	8.57963e-20	1.10636e-19	ENSMUST00000122359	Afap1l2	UTR3
2225	peak_2225	chr2	66483229	66483554	90.1387	-	66483229	66483554	0	1	325	0	8	351	6.63674	4.81149e-28	7.33732e-28	ENSMUST00000112354	Scn9a	UTR3
15621	peak_15621	chr16	50727131	50727245	385.058	+	50727131	50727245	0	1	114	0	60	2358	6.63491	2.65479e-117	1.21856e-116	ENSMUST00000186806	Dubr	UTR3
4638	peak_4638	chr4	132727271	132728046	308.327	-	132727271	132728046	0	1	775	0	33	1613	6.6349	4.2996e-94	1.52845e-93	ENSMUST00000045550	Xkr8	UTR3
11447	peak_11447	chr11	26386934	26397794	463.325	+	26386934	26397794	0	2	376,49	0,10811	97	4275	6.63322	5.53231e-141	3.35195e-140	ENSMUST00000004120	Fancl	UTR5
80	peak_80	chr1	36472669	36472894	115.733	+	36472669	36472894	0	1	225	0	51	2100	6.63291	8.28927e-36	1.44821e-35	ENSMUST00000192530	Cnnm4	UTR5
6299	peak_6299	chr6	82558578	82558753	27.1592	+	82558578	82558753	0	1	175	0	1	68	6.63107	6.56597e-09	6.67234e-09	ENSMUST00000203775	Tacr1	UTR3
6474	peak_6474	chr6	129423401	129423451	26.9568	+	129423401	129423451	0	1	50	0	1	68	6.62935	7.56109e-09	7.67688e-09	ENSMUST00000058352	Clec9a	UTR3
18535	peak_18535	chrX	104855329	104855504	60.7021	-	104855329	104855504	0	1	175	0	5	216	6.628	4.20439e-19	5.33161e-19	ENSMUST00000033575	Magee2	UTR3
10209	peak_10209	chr9	59736358	59736658	287.247	-	59736358	59736658	0	1	300	0	35	1379	6.62775	1.02689e-87	3.3886e-87	ENSMUST00000217093	Senp8	UTR3
4671	peak_4671	chr4	134703868	134704068	30.1112	-	134703868	134704068	0	1	200	0	1	221	6.62749	8.3687e-10	8.62232e-10	ENSMUST00000054096	Man1c1	UTR5
26	peak_26	chr1	19234193	19234468	218.446	+	19234193	19234468	0	1	275	0	26	1062	6.6262	6.67544e-67	1.74285e-66	ENSMUST00000064976	Tfap2b	LastExon
7323	peak_7323	chr7	64337558	64338258	627.836	+	64337558	64338258	0	1	700	0	105	4289	6.62552	9.32226e-191	1.00569e-189	ENSMUST00000173374	Gm20457	UTR3
13061	peak_13061	chr12	113188947	113189520	578.405	+	113188947	113189520	0	1	573	0	93	8985	6.62498	8.53333e-176	7.63614e-175	ENSMUST00000058491	Tmem121	LastExon
4991	peak_4991	chr5	34699179	34699379	83.0884	+	34699179	34699379	0	1	200	0	7	326	6.62341	6.64532e-26	9.72499e-26	ENSMUST00000074651	Grk4	UTR3
7628	peak_7628	chr7	139256032	139256457	112.611	+	139256032	139256457	0	1	425	0	10	485	6.62335	7.33507e-35	1.26116e-34	ENSMUST00000172136	Pwwp2b	Exon
17678	peak_17678	chr19	25411153	25411753	318.336	+	25411153	25411753	0	1	600	0	37	2360	6.6233	4.0344e-97	1.48342e-96	ENSMUST00000146647	Kank1	Exon
13765	peak_13765	chr13	41311515	41312040	Inf	-	41311515	41312040	0	1	525	0	374	14737	6.62254	0	0	ENSMUST00000163623	Nedd9	UTR3
1746	peak_1746	chr2	137068670	137069320	435.173	+	137068670	137069320	0	1	650	0	54	2164	6.62213	1.81716e-132	9.99868e-132	ENSMUST00000180277	Slx4ip	UTR3
2040	peak_2040	chr2	25577065	25577165	28.4529	-	25577065	25577165	0	1	100	0	1	135	6.61821	2.66364e-09	2.72164e-09	ENSMUST00000181730	Gm26702	UTR5
2480	peak_2480	chr2	132372924	132373499	216.862	-	132372924	132373499	0	1	575	0	23	892	6.61707	2.0109e-66	5.22307e-66	ENSMUST00000110156	Prokr2	UTR3
14116	peak_14116	chr14	24621482	24621693	98.9933	+	24621482	24621693	0	1	211	0	9	389	6.61481	9.88663e-31	1.58504e-30	ENSMUST00000038250	4930428N03Rik	UTR5
1836	peak_1836	chr2	156307414	156308339	Inf	+	156307414	156308339	0	1	925	0	521	21255	6.61442	0	0	ENSMUST00000152617	Phf20	UTR5
7242	peak_7242	chr7	43471008	43471108	27.4399	+	43471008	43471108	0	1	100	0	1	92	6.61439	5.39694e-09	5.49245e-09	ENSMUST00000107977	Vsig10l	UTR3
18084	peak_18084	chr19	59907058	59936024	Inf	-	59907058	59936024	0	3	85,46,419	0,6344,28547	419	16181	6.61324	0	0	ENSMUST00000170819	Rab11fip2	Exon
2798	peak_2798	chr3	28131800	28132250	323.691	+	28131800	28132250	0	1	450	0	38	1496	6.61196	9.70507e-99	3.62428e-98	ENSMUST00000148827	Pld1	UTR3
17759	peak_17759	chr19	43615655	43615705	26.6594	+	43615655	43615705	0	1	50	0	1	92	6.61113	9.30466e-09	9.43481e-09	ENSMUST00000057178	Nkx2-3	UTR3
9234	peak_9234	chr8	99030381	99030756	169.505	-	99030381	99030756	0	1	375	0	20	796	6.61089	4.30996e-52	9.41702e-52	ENSMUST00000128860	Cdh8	UTR3
8638	peak_8638	chr8	83083436	83083911	499.88	+	83083436	83083911	0	1	475	0	66	2899	6.60916	4.87612e-152	3.32043e-151	ENSMUST00000211485	Gm45449	UTR3
11968	peak_11968	chr11	113470526	113470577	26.7334	+	113470526	113470577	0	2	30,20	0,31	1	65	6.60812	8.83665e-09	8.96269e-09	ENSMUST00000105048	Gm16487	UTR5
15479	peak_15479	chr16	18501186	18538469	480.15	+	18501186	18538469	0	2	472,78	0,37205	60	3531	6.60769	4.53522e-146	2.88775e-145	ENSMUST00000146673	Rtl10	LastExon
4815	peak_4815	chr4	154319374	154320749	Inf	-	154319374	154320749	0	1	1375	0	861	36335	6.60556	0	0	ENSMUST00000097759	Prdm16	UTR3
15965	peak_15965	chr16	96173855	96175862	40.5899	-	96173855	96175862	0	2	15110	0,1897	3	143	6.60546	5.50221e-13	6.04253e-13	ENSMUST00000142620	Lca5l	UTR3
10171	peak_10171	chr9	56917749	56918424	572.965	-	56917749	56918424	0	1	675	0	151	7242	6.60536	3.77185e-174	3.31478e-173	ENSMUST00000050916	Snx33	UTR3
18087	peak_18087	chr19	60528545	60529020	Inf	-	60528545	60529020	0	1	475	0	320	12554	6.60447	0	0	ENSMUST00000111460	Cacul1	UTR3
8535	peak_8535	chr8	69663679	69664170	284.587	+	69663679	69664170	0	1	491	0	32	1283	6.60219	6.55841e-87	2.14105e-86	ENSMUST00000169125	Zfp964	LastExon
14054	peak_14054	chr13	107726367	107727192	Inf	-	107726367	107727192	0	1	825	0	270	13467	6.60135	0	0	ENSMUST00000224719	Zswim6	UTR3
12473	peak_12473	chr11	89039728	89040803	Inf	-	89039728	89040803	0	1	1075	0	310	11987	6.60099	0	0	ENSMUST00000152772	Dgke	UTR3
7344	peak_7344	chr7	73776566	73776916	213.273	+	73776566	73776916	0	1	350	0	20	976	6.60096	2.44927e-65	6.28632e-65	ENSMUST00000107456	Fam174b	UTR3
18267	peak_18267	chrX	103482040	103482940	211.36	+	103482040	103482940	0	1	900	0	3372	135960	6.60058	9.30358e-65	2.367e-64	ENSMUST00000127786	Xist	UTR3
6130	peak_6130	chr6	8593049	8593599	Inf	+	8593049	8593599	0	1	550	0	302	11693	6.59923	0	0	ENSMUST00000161494	Glcci1	UTR3
2916	peak_2916	chr3	81212701	81213301	553.159	+	81212701	81213301	0	1	600	0	90	3401	6.59912	3.69217e-168	3.03703e-167	ENSMUST00000129285	Pdgfc	UTR3
1501	peak_1501	chr2	83879267	83880742	Inf	+	83879267	83880742	0	1	1475	0	1257	49777	6.59898	0	0	ENSMUST00000051454	Fam171b	LastExon
9542	peak_9542	chr9	44478173	44478573	200.291	+	44478173	44478573	0	1	400	0	19	1074	6.5982	2.07827e-61	5.08474e-61	ENSMUST00000216321	Gm47204	UTR3
6473	peak_6473	chr6	128473698	128473873	46.1436	+	128473698	128473873	0	1	175	0	4	185	6.59605	1.12403e-14	1.28643e-14	ENSMUST00000204037	Gm10069	UTR5
11202	peak_11202	chr10	80834481	80834656	32.2584	-	80834481	80834656	0	1	175	0	2	249	6.59431	1.86648e-10	1.94651e-10	ENSMUST00000053986	Lingo3	LastExon
6819	peak_6819	chr6	113747793	113748543	712.74	-	113747793	113748543	0	1	750	0	272	10689	6.59356	1.84635e-216	2.77862e-215	ENSMUST00000205052	Atp2b2	UTR3
9084	peak_9084	chr8	68358230	68358505	69.8741	-	68358230	68358505	0	1	275	0	6	248	6.59351	6.8516e-22	9.24279e-22	ENSMUST00000130214	Csgalnact1	UTR3
565	peak_565	chr1	3216521	3216771	142.442	-	3216521	3216771	0	1	250	0	16	640	6.59342	6.7068e-44	1.32031e-43	ENSMUST00000070533	Xkr4	LastExon
13158	peak_13158	chr12	66471092	66471517	200.635	-	66471092	66471517	0	1	425	0	23	981	6.59316	1.63542e-61	4.00757e-61	ENSMUST00000178814	Mdga2	UTR3
3795	peak_3795	chr4	57710198	57710348	40.148	+	57710198	57710348	0	1	150	0	3	146	6.58878	7.4978e-13	8.20846e-13	ENSMUST00000102904	Palm2	UTR3
13045	peak_13045	chr12	112679782	112679832	28.4944	+	112679782	112679832	0	1	50	0	1	115	6.5869	2.58732e-09	2.64437e-09	ENSMUST00000173942	Zbtb42	LastExon
9715	peak_9715	chr9	77545708	77545983	231.867	+	77545708	77545983	0	1	275	0	28	1093	6.58678	5.80542e-71	1.5892e-70	ENSMUST00000184563	Gm19569	UTR5
2415	peak_2415	chr2	122684732	122685257	697.518	-	122684732	122685257	0	1	525	0	115	4463	6.58641	7.52425e-212	1.062e-210	ENSMUST00000099457	Slc30a4	UTR3
15961	peak_15961	chr16	96001884	96003109	Inf	-	96001884	96003109	0	1	1225	0	2075	81586	6.5859	0	0	ENSMUST00000232755	Brwd1	UTR3
9321	peak_9321	chr8	116970623	116970898	70.2634	-	116970623	116970898	0	1	275	0	7	343	6.58543	5.21564e-22	7.05683e-22	ENSMUST00000070577	1700030J22Rik	UTR3
2006	peak_2006	chr2	18045141	18046816	Inf	-	18045141	18046816	0	1	1675	0	1306	48680	6.58506	0	0	ENSMUST00000066885	Skida1	UTR3
16227	peak_16227	chr17	35385069	35385194	29.5637	+	35385069	35385194	0	1	125	0	2	99	6.58465	1.22681e-09	1.26022e-09	ENSMUST00000173975	H2-Q4	UTR5
3316	peak_3316	chr3	58675762	58676262	502.83	-	58675762	58676262	0	1	500	0	74	2963	6.58443	6.24958e-153	4.29653e-152	ENSMUST00000070368	Siah2	UTR3
12293	peak_12293	chr11	63888916	63889266	234.409	-	63888916	63889266	0	1	350	0	35	1497	6.58312	9.88967e-72	2.72727e-71	ENSMUST00000094103	Hs3st3b1	UTR3
15029	peak_15029	chr15	13034199	13034624	633.754	-	13034199	13034624	0	1	425	0	134	6414	6.58228	1.50787e-192	1.6633e-191	ENSMUST00000036439	Cdh6	UTR3
10466	peak_10466	chr9	119972340	119972490	28.6619	-	119972340	119972490	0	1	150	0	1	119	6.58092	2.3017e-09	2.35453e-09	ENSMUST00000214058	Csrnp1	LastExon
15059	peak_15059	chr15	42426451	42426626	50.543	-	42426451	42426626	0	1	175	0	4	177	6.58022	5.15298e-16	6.09595e-16	ENSMUST00000022921	Angpt1	UTR3
18028	peak_18028	chr19	43736378	43736753	554.25	-	43736378	43736753	0	1	375	0	89	3459	6.5802	1.72385e-168	1.42552e-167	ENSMUST00000045562	Cox15	UTR3
11035	peak_11035	chr10	42313234	42313409	46.767	-	42313234	42313409	0	1	175	0	4	186	6.58	7.26897e-15	8.35101e-15	ENSMUST00000133326	Afg1l	UTR3
7994	peak_7994	chr7	74283687	74284512	660.747	-	74283687	74284512	0	1	825	0	171	6594	6.5795	1.01819e-200	1.24556e-199	ENSMUST00000026897	Slco3a1	UTR3
18408	peak_18408	chrX	21082148	21082398	87.5313	-	21082148	21082398	0	1	250	0	8	320	6.57925	2.97251e-27	4.47161e-27	ENSMUST00000040667	Zfp300	LastExon
10981	peak_10981	chr10	24595281	24595406	26.3984	-	24595281	24595406	0	1	125	0	1	66	6.57896	1.11623e-08	1.13055e-08	ENSMUST00000125158	Gm15270	UTR3
15503	peak_15503	chr16	21926467	21928843	491.929	+	21926467	21928843	0	2	3897	0,1479	139	5620	6.57796	1.236e-149	8.21547e-149	ENSMUST00000042065	Map3k13	LastExon
18441	peak_18441	chrX	53669177	53669677	642.012	-	53669177	53669677	0	1	500	0	110	6257	6.57765	4.76762e-195	5.43275e-194	ENSMUST00000088778	Rtl8b	UTR3
9312	peak_9312	chr8	115704403	115704778	304.429	-	115704403	115704778	0	1	375	0	39	1707	6.57746	6.4932e-93	2.27824e-92	ENSMUST00000109104	Maf	UTR3
3567	peak_3567	chr3	126922780	126923855	Inf	-	126922780	126923855	0	1	1075	0	1377	52294	6.57734	0	0	ENSMUST00000182078	Ank2	UTR3
13243	peak_13243	chr12	83213994	83214169	30.0264	-	83213994	83214169	0	1	175	0	2	194	6.57724	8.87962e-10	9.14466e-10	ENSMUST00000178756	Dpf3	UTR3
5713	peak_5713	chr5	73020546	73021146	704.76	-	73020546	73021146	0	1	600	0	165	6166	6.5749	4.79896e-214	7.01801e-213	ENSMUST00000146953	Fryl	UTR3
860	peak_860	chr1	121327924	121328024	28.013	-	121327924	121328024	0	1	100	0	1	109	6.57395	3.61992e-09	3.69185e-09	ENSMUST00000003818	Insig2	UTR5
10975	peak_10975	chr10	19004369	19004744	112.202	-	19004369	19004744	0	1	375	0	10	464	6.57018	9.75976e-35	1.67466e-34	ENSMUST00000154590	Tnfaip3	UTR3
17697	peak_17697	chr19	32514226	32515151	Inf	+	32514226	32515151	0	1	925	0	237	9237	6.56826	0	0	ENSMUST00000025827	Minpp1	LastExon
8485	peak_8485	chr8	36994049	36994574	292.513	+	36994049	36994574	0	1	525	0	32	1231	6.56515	2.61843e-89	8.80417e-89	ENSMUST00000098825	AI429214	LastExon
155	peak_155	chr1	62815686	62816136	922.779	+	62815686	62816136	0	1	450	0	289	11443	6.56507	4.34017e-280	1.64353e-278	ENSMUST00000114157	Nrp2	UTR3
9719	peak_9719	chr9	78109191	78109341	39.9605	+	78109191	78109341	0	1	150	0	3	131	6.56368	8.55003e-13	9.34724e-13	ENSMUST00000125615	Ick	UTR5
8821	peak_8821	chr8	112017904	112018654	Inf	+	112017904	112018654	0	1	750	0	678	27478	6.56317	0	0	ENSMUST00000052138	Terf2ip	LastExon
3488	peak_3488	chr3	102158075	102158250	61.8674	-	102158075	102158250	0	1	175	0	5	239	6.56258	1.85966e-19	2.37717e-19	ENSMUST00000159388	Vangl1	UTR3
125	peak_125	chr1	57382915	57383715	802.126	+	57382915	57383715	0	1	800	0	226	8773	6.56168	1.56385e-243	3.43585e-242	ENSMUST00000042734	1700066M21Rik	LastExon
6954	peak_6954	chr6	134869092	134869817	779.897	-	134869092	134869817	0	1	725	0	204	7976	6.56092	8.47633e-237	1.68901e-235	ENSMUST00000111932	Gpr19	UTR3
8391	peak_8391	chr8	13879424	13880424	Inf	+	13879424	13880424	0	1	1000	0	1175	44264	6.56068	0	0	ENSMUST00000128557	Champ1	LastExon
8019	peak_8019	chr7	80325291	80325516	590.13	-	80325291	80325516	0	1	225	0	160	8834	6.56052	2.41109e-179	2.25507e-178	ENSMUST00000206363	Unc45a	UTR3
6131	peak_6131	chr6	9247154	9248379	414.902	+	9247154	9248379	0	1	1225	0	106	4026	6.5602	2.48352e-126	1.26457e-125	ENSMUST00000060369	Nxph1	LastExon
13680	peak_13680	chr13	113320000	113320225	109.502	+	113320000	113320225	0	1	225	0	11	435	6.56014	6.43149e-34	1.08833e-33	ENSMUST00000136755	BC067074	Exon
1401	peak_1401	chr2	38959924	38960149	104.145	+	38959924	38960149	0	1	225	0	9	652	6.55994	2.71309e-32	4.45863e-32	ENSMUST00000057279	Olfml2a	LastExon
18481	peak_18481	chrX	86747744	86747819	29.1765	-	86747744	86747819	0	1	75	0	2	99	6.559	1.6068e-09	1.64811e-09	ENSMUST00000078875	Il1rapl1	LastExon
13366	peak_13366	chr12	110976152	110976852	411.548	-	110976152	110976852	0	1	700	0	79	5193	6.55843	2.57176e-125	1.29289e-124	ENSMUST00000135131	Ankrd9	UTR3
12584	peak_12584	chr11	105165675	105165850	29.0379	-	105165675	105165850	0	1	175	0	1	141	6.55701	1.77023e-09	1.81435e-09	ENSMUST00000118770	Gm11620	UTR3
5491	peak_5491	chr5	144277060	144279098	340.406	+	144277060	144279098	0	3	268,40,42	0,622,1996	45	2136	6.55683	8.48367e-104	3.36869e-103	ENSMUST00000156467	Gm15708	UTR5
5681	peak_5681	chr5	49959950	49960900	Inf	-	49959950	49960900	0	1	950	0	1203	44789	6.55672	0	0	ENSMUST00000030971	Adgra3	UTR3
14181	peak_14181	chr14	35580858	35580908	30.0268	+	35580858	35580908	0	1	50	0	2	107	6.55488	8.87645e-10	9.14191e-10	ENSMUST00000043349	Grid1	UTR3
5679	peak_5679	chr5	45733264	45733939	Inf	-	45733264	45733939	0	1	675	0	434	15936	6.55459	0	0	ENSMUST00000016026	Lcorl	UTR3
16998	peak_16998	chr18	37308779	37309129	73.1104	+	37308779	37309129	0	1	350	0	6	326	6.5537	7.12958e-23	9.8081e-23	ENSMUST00000056712	Pcdhb4	LastExon
5693	peak_5693	chr5	62749292	62749342	24.2848	-	62749292	62749342	0	1	50	0	1	60	6.55298	4.86075e-08	4.89252e-08	ENSMUST00000159470	Arap2	LastExon
14418	peak_14418	chr14	16240655	16240880	135.051	-	16240655	16240880	0	1	225	0	13	496	6.55282	1.16007e-41	2.2163e-41	ENSMUST00000112624	Oxsm	UTR3
15063	peak_15063	chr15	45108958	45109358	127.029	-	45108958	45109358	0	1	400	0	15	566	6.55141	3.12221e-39	5.7594e-39	ENSMUST00000022967	Kcnv1	UTR3
9701	peak_9701	chr9	73095742	73095917	40.0495	+	73095742	73095917	0	1	175	0	3	131	6.55128	8.03537e-13	8.7882e-13	ENSMUST00000034722	Rab27a	UTR3
13434	peak_13434	chr13	24900594	24900794	48.0639	+	24900594	24900794	0	1	200	0	4	192	6.54962	2.92892e-15	3.39886e-15	ENSMUST00000006893	D130043K22Rik	UTR3
2158	peak_2158	chr2	35400928	35401528	243	-	35400928	35401528	0	1	600	0	33	1431	6.54918	2.50409e-74	7.07624e-74	ENSMUST00000102794	Ggta1	UTR3
16439	peak_16439	chr17	14196755	14196805	26.8875	-	14196755	14196805	0	1	50	0	1	99	6.54849	7.93451e-09	8.0547e-09	ENSMUST00000053218	Dact2	LastExon
1757	peak_1757	chr2	144537331	144539210	Inf	+	144537331	144539210	0	2	26599	0,1280	298	10845	6.54693	0	0	ENSMUST00000028914	Polr3f	LastExon
15645	peak_15645	chr16	77115817	77115892	38.7888	+	77115817	77115892	0	1	75	0	3	163	6.54638	1.94206e-12	2.10571e-12	ENSMUST00000023580	Usp25	UTR3
10588	peak_10588	chr10	41810948	41887511	544.874	+	41810948	41887511	0	2	352,73	0,76490	91	4155	6.54632	1.18624e-165	9.47719e-165	ENSMUST00000099931	Sesn1	UTR5
17146	peak_17146	chr18	61084458	61085058	978.298	+	61084458	61085058	0	1	600	0	275	11928	6.54566	6.30778e-297	3.18483e-295	ENSMUST00000115274	Pdgfrb	UTR3
8818	peak_8818	chr8	111622512	111623087	Inf	+	111622512	111623087	0	1	575	0	831	37033	6.54472	0	0	ENSMUST00000173922	Znrf1	UTR3
8177	peak_8177	chr7	120957885	120958435	192.039	-	120957885	120958435	0	1	550	0	217	9663	6.54391	6.52452e-59	1.55029e-58	ENSMUST00000033169	Cdr2	UTR3
4443	peak_4443	chr4	88720066	88721691	Inf	-	88720066	88721691	0	1	1625	0	3235	117545	6.54381	0	0	ENSMUST00000094993	Klhl9	UTR3
9160	peak_9160	chr8	79339219	79339669	858.763	-	79339219	79339669	0	1	450	0	176	6404	6.54282	1.09963e-260	3.06694e-259	ENSMUST00000066091	Smad1	UTR3
16056	peak_16056	chr17	21561516	21562066	250.074	+	21561516	21562066	0	1	550	0	30	1304	6.54277	1.81222e-76	5.25176e-76	ENSMUST00000079242	Zfp52	LastExon
11689	peak_11689	chr11	73223976	73224176	40.0002	+	73223976	73224176	0	1	200	0	3	183	6.54151	8.31631e-13	9.09386e-13	ENSMUST00000006105	Shpk	UTR3
4369	peak_4369	chr4	55531917	55531967	26.7215	-	55531917	55531967	0	1	50	0	1	68	6.54082	8.91033e-09	9.03693e-09	ENSMUST00000132746	Klf4	UTR5
15952	peak_15952	chr16	93590065	93590635	213.292	-	93590065	93590635	0	2	20380	0,190	26	1164	6.54049	2.41756e-65	6.20664e-65	ENSMUST00000123756	Setd4	UTR3
14994	peak_14994	chr15	5100855	5100955	25.9392	-	5100855	5100955	0	1	100	0	1	68	6.54002	1.5369e-08	1.55426e-08	ENSMUST00000118365	Card6	LastExon
10118	peak_10118	chr9	50775102	50775202	28.8899	-	50775102	50775202	0	1	100	0	2	97	6.53995	1.96233e-09	2.01035e-09	ENSMUST00000176894	1110032A03Rik	UTR3
4886	peak_4886	chr5	20702759	20703309	815.43	+	20702759	20703309	0	1	550	0	378	13950	6.53953	1.46067e-247	3.39748e-246	ENSMUST00000101558	Magi2	UTR3
11678	peak_11678	chr11	72768364	72768739	834.995	+	72768364	72768739	0	1	375	0	278	11773	6.53924	1.75396e-253	4.38043e-252	ENSMUST00000155998	Ankfy1	UTR3
3014	peak_3014	chr3	94331765	94332090	138.75	+	94331765	94332090	0	1	325	0	14	531	6.53892	8.77576e-43	1.70598e-42	ENSMUST00000049822	Them4	UTR3
12259	peak_12259	chr11	59784496	59784596	29.6353	-	59784496	59784596	0	1	100	0	2	158	6.53708	1.16679e-09	1.19916e-09	ENSMUST00000051493	Pld6	UTR3
2847	peak_2847	chr3	41613237	41614437	Inf	+	41613237	41614437	0	1	1200	0	693	26346	6.53669	0	0	ENSMUST00000168086	Jade1	LastExon
5716	peak_5716	chr5	74000237	74000612	583.875	-	74000237	74000612	0	1	375	0	92	3406	6.53369	1.88052e-177	1.72251e-176	ENSMUST00000068058	Usp46	UTR3
14121	peak_14121	chr14	26396328	26396378	26.1806	+	26396328	26396378	0	1	50	0	1	63	6.53285	1.29947e-08	1.31478e-08	ENSMUST00000168234	4933413J09Rik	UTR5
14083	peak_14083	chr14	7950563	7951088	769.745	+	7950563	7951088	0	1	525	0	262	10522	6.53259	1.00358e-233	1.92166e-232	ENSMUST00000052678	Flnb	UTR3
8978	peak_8978	chr8	15895386	15895761	97.7705	-	15895386	15895761	0	1	375	0	10	403	6.53258	2.32585e-30	3.69955e-30	ENSMUST00000125551	Csmd1	UTR3
10053	peak_10053	chr9	36891956	36892681	606.048	-	36891956	36892681	0	1	725	0	165	7554	6.53128	3.68941e-184	3.64268e-183	ENSMUST00000080754	Pknox2	UTR3
17010	peak_17010	chr18	37355920	37356045	30.0313	+	37355920	37356045	0	1	125	0	2	123	6.53036	8.84801e-10	9.11363e-10	ENSMUST00000051163	Pcdhb8	LastExon
16381	peak_16381	chr17	81001020	81001595	Inf	+	81001020	81001595	0	1	575	0	428	15638	6.52892	0	0	ENSMUST00000025092	Tmem178	LastExon
13753	peak_13753	chr13	38022321	38022371	26.9995	-	38022321	38022371	0	1	50	0	2	112	6.52833	7.33815e-09	7.45296e-09	ENSMUST00000089840	Cage1	LastExon
15817	peak_15817	chr16	32019764	32020164	Inf	-	32019764	32020164	0	1	400	0	478	17298	6.52821	0	0	ENSMUST00000023467	Pak2	UTR3
12141	peak_12141	chr11	18881352	18881752	203.314	-	18881352	18881752	0	1	400	0	22	829	6.52685	2.52962e-62	6.25556e-62	ENSMUST00000177357	Meis1	UTR3
3171	peak_3171	chr3	132085816	132085966	27.8586	+	132085816	132085966	0	1	150	0	1	132	6.52548	4.03185e-09	4.10904e-09	ENSMUST00000029665	Dkk2	UTR5
16722	peak_16722	chr17	51739386	51740236	Inf	-	51739386	51740236	0	1	850	0	877	31869	6.52415	0	0	ENSMUST00000140979	Satb1	UTR3
17152	peak_17152	chr18	61989903	61989953	27.0787	+	61989903	61989953	0	1	50	0	1	82	6.52384	6.94498e-09	7.05518e-09	ENSMUST00000236759	Sh3tc2	Exon
78	peak_78	chr1	36320954	36321029	26.2795	+	36320954	36321029	0	1	75	0	1	77	6.52228	1.2127e-08	1.22766e-08	ENSMUST00000115029	Arid5a	UTR3
13472	peak_13472	chr13	38195952	38196202	59.1881	+	38195952	38196202	0	1	250	0	5	242	6.52223	1.2136e-18	1.5227e-18	ENSMUST00000127906	Dsp	LastExon
444	peak_444	chr1	166311897	166312372	491.852	+	166311897	166312372	0	1	475	0	129	4830	6.52217	1.30431e-149	8.6633e-149	ENSMUST00000111416	Ildr2	UTR3
15252	peak_15252	chr15	83358500	83358550	25.8853	-	83358500	83358550	0	1	50	0	1	81	6.52091	1.59564e-08	1.61339e-08	ENSMUST00000100370	1700001L05Rik	UTR3
16393	peak_16393	chr17	85624030	85624405	237.718	+	85624030	85624405	0	1	375	0	40	1494	6.51869	9.89044e-73	2.75357e-72	ENSMUST00000176081	Six3	UTR3
10899	peak_10899	chr10	126014734	126015059	307.5	+	126014734	126015059	0	1	325	0	38	1400	6.51832	7.65348e-94	2.71242e-93	ENSMUST00000219974	Lrig3	UTR5
1156	peak_1156	chr1	186624535	186625585	845.171	-	186624535	186625585	0	1	1050	0	225	8119	6.51761	1.44435e-256	3.78478e-255	ENSMUST00000195201	Tgfb2	UTR3
12358	peak_12358	chr11	73135734	73136534	439.07	-	73135734	73136534	0	1	800	0	75	2721	6.51636	1.20471e-133	6.71203e-133	ENSMUST00000052140	Haspin	UTR3
11011	peak_11011	chr10	34153593	34153868	270.935	-	34153593	34153868	0	1	275	0	32	1184	6.51562	8.85815e-83	2.75796e-82	ENSMUST00000217051	Dse	LastExon
15032	peak_15032	chr15	26543083	26543508	256.76	-	26543083	26543508	0	1	425	0	29	1610	6.51556	1.71918e-78	5.0995e-78	ENSMUST00000059204	Fbxl7	UTR3
13129	peak_13129	chr12	41451697	41452147	495.102	-	41451697	41452147	0	1	450	0	110	4400	6.51504	1.35525e-150	9.10552e-150	ENSMUST00000043884	Lrrn3	UTR3
11812	peak_11812	chr11	86689600	86690275	797.805	+	86689600	86690275	0	1	675	0	434	15813	6.51459	3.2056e-242	6.86478e-241	ENSMUST00000108021	Ptrh2	LastExon
3657	peak_3657	chr4	11583927	11584227	702.754	+	11583927	11584227	0	1	300	0	151	5411	6.51422	1.94785e-213	2.81758e-212	ENSMUST00000095145	Rad54b	UTR3
9733	peak_9733	chr9	86574231	86574531	66.394	+	86574231	86574531	0	1	300	0	6	251	6.51393	7.82304e-21	1.03135e-20	ENSMUST00000179212	Rwdd2a	LastExon
7887	peak_7887	chr7	41479279	41479804	386.353	-	41479279	41479804	0	1	525	0	70	2554	6.51378	1.07798e-117	4.96881e-117	ENSMUST00000098509	AW146154	UTR3
7281	peak_7281	chr7	45716386	45716461	29.4142	+	45716386	45716461	0	1	75	0	2	105	6.5137	1.3616e-09	1.39776e-09	ENSMUST00000210640	Rpl18	UTR5
7804	peak_7804	chr7	27988299	27988474	77.5667	-	27988299	27988474	0	1	175	0	7	270	6.51262	3.15346e-24	4.46784e-24	ENSMUST00000180502	Zfp850	UTR3
5731	peak_5731	chr5	84331363	84331813	Inf	-	84331363	84331813	0	1	450	0	2842	102215	6.51166	0	0	ENSMUST00000136775	Epha5	UTR3
14262	peak_14262	chr14	58109421	58109696	76.7674	+	58109421	58109696	0	1	275	0	7	277	6.51103	5.5156e-24	7.77492e-24	ENSMUST00000074654	Fgf9	LastExon
10930	peak_10930	chr10	128502495	128503145	535.808	+	128502495	128503145	0	1	650	0	99	3682	6.51089	6.58141e-163	5.07946e-162	ENSMUST00000180477	A430046D13Rik	UTR5
9576	peak_9576	chr9	51849621	51850671	604.173	+	51849621	51850671	0	1	1050	0	131	4931	6.51089	1.36418e-183	1.33557e-182	ENSMUST00000130405	Arhgap20	LastExon
3495	peak_3495	chr3	103802804	103803579	671.19	-	103802804	103803579	0	1	775	0	158	5882	6.51071	7.03672e-204	8.94888e-203	ENSMUST00000198752	Dclre1b	UTR3
14743	peak_14743	chr15	23173651	23173776	28.6782	+	23173651	23173776	0	1	125	0	2	95	6.51034	2.27525e-09	2.32811e-09	ENSMUST00000226693	Cdh18	UTR5
14171	peak_14171	chr14	33934548	33934898	82.4448	+	33934548	33934898	0	1	350	0	8	350	6.50647	1.04272e-25	1.51927e-25	ENSMUST00000168727	Gdf10	UTR3
13613	peak_13613	chr13	77192686	77193186	543.055	+	77192686	77193186	0	1	500	0	77	2829	6.50441	4.21233e-165	3.34384e-164	ENSMUST00000225605	2210408I21Rik	LastExon
17760	peak_17760	chr19	43729984	43730584	380.208	+	43729984	43730584	0	1	600	0	46	1786	6.5025	7.77406e-116	3.5155e-115	ENSMUST00000081079	Entpd7	UTR3
13683	peak_13683	chr13	113368117	113369117	339.93	+	113368117	113369117	0	1	1000	0	45	1911	6.50208	1.18316e-103	4.6881e-103	ENSMUST00000136755	BC067074	LastExon
2744	peak_2744	chr2	181075578	181075878	407.502	-	181075578	181075878	0	1	300	0	62	2860	6.50207	4.32216e-124	2.13654e-123	ENSMUST00000103047	Kcnq2	UTR3
454	peak_454	chr1	170681994	170682419	353.316	+	170681994	170682419	0	1	425	0	68	2575	6.5016	1.05841e-107	4.37719e-107	ENSMUST00000046792	Olfml2b	LastExon
317	peak_317	chr1	125872922	125872972	28.2083	+	125872922	125872972	0	1	50	0	2	98	6.50135	3.15952e-09	3.22442e-09	ENSMUST00000027582	Lypd1	UTR3
7102	peak_7102	chr7	24106037	24106612	743.579	+	24106037	24106612	0	1	575	0	240	9280	6.501	8.45792e-226	1.44701e-224	ENSMUST00000203854	Zfp180	UTR3
1230	peak_1230	chr2	14985704	14986104	548.898	+	14985704	14986104	0	1	400	0	105	4480	6.50098	7.18377e-167	5.82423e-166	ENSMUST00000193452	Cacnb2	UTR5
4358	peak_4358	chr4	49586755	49586805	26.4004	-	49586755	49586805	0	1	50	0	1	79	6.50067	1.11464e-08	1.12901e-08	ENSMUST00000150664	Tmem246	LastExon
2000	peak_2000	chr2	14070406	14070631	57.5989	-	14070406	14070631	0	1	225	0	5	199	6.49968	3.69531e-18	4.58157e-18	ENSMUST00000152524	Stamos	UTR3
999	peak_999	chr1	155846840	155847490	863.892	-	155846840	155847490	0	1	650	0	232	8354	6.49925	3.08599e-262	8.76448e-261	ENSMUST00000138762	Cep350	UTR3
14413	peak_14413	chr14	7294272	7294597	137.304	-	7294272	7294597	0	1	325	0	15	556	6.49922	2.40818e-42	4.65038e-42	ENSMUST00000165744	Gm3739	UTR3
14414	peak_14414	chr14	7467011	7467336	62.7327	-	7467011	7467336	0	1	325	0	14	555	6.49868	1.0139e-19	1.30491e-19	ENSMUST00000164366	Gm3752	UTR3
2461	peak_2461	chr2	130874158	130875483	621.396	-	130874158	130875483	0	1	1325	0	153	8978	6.49773	8.31225e-189	8.73466e-188	ENSMUST00000135110	A730017L22Rik	UTR3
1032	peak_1032	chr1	161019395	161020095	966.925	-	161019395	161020095	0	1	700	0	264	9437	6.49757	1.79472e-293	8.44379e-292	ENSMUST00000171748	Zbtb37	UTR3
13390	peak_13390	chr13	3492362	3492762	167.682	+	3492362	3492762	0	1	400	0	19	718	6.49593	1.53598e-51	3.33297e-51	ENSMUST00000221008	2810429I04Rik	UTR5
9987	peak_9987	chr9	20435921	20438021	Inf	-	20435921	20438021	0	1	2100	0	1159	41180	6.49535	0	0	ENSMUST00000098970	Zfp26	UTR3
13122	peak_13122	chr12	32919858	32919933	25.0282	-	32919858	32919933	0	1	75	0	1	59	6.49529	2.89801e-08	2.92248e-08	ENSMUST00000181670	4933406C10Rik	UTR3
11620	peak_11620	chr11	62841080	62841355	95.105	+	62841080	62841355	0	1	275	0	9	336	6.49469	1.49942e-29	2.34715e-29	ENSMUST00000108703	Trim16	UTR3
17056	peak_17056	chr18	37514276	37514501	90.5373	+	37514276	37514501	0	1	225	0	9	335	6.49458	3.64362e-28	5.56611e-28	ENSMUST00000061405	Pcdhb21	LastExon
6413	peak_6413	chr6	117716972	117717097	60.0245	+	117716972	117717097	0	1	125	0	5	218	6.49341	6.75411e-19	8.52778e-19	ENSMUST00000195277	Gm7292	UTR5
635	peak_635	chr1	38797318	38797918	708.491	-	38797318	38797918	0	1	600	0	153	5528	6.49329	3.54449e-215	5.28299e-214	ENSMUST00000039612	Lonrf2	UTR3
12779	peak_12779	chr12	24958974	24959449	674.936	+	24958974	24959449	0	1	475	0	252	9367	6.49001	5.17665e-205	6.66986e-204	ENSMUST00000222994	Mboat2	UTR3
18515	peak_18515	chrX	103466049	103466524	215.553	-	103466049	103466524	0	1	475	0	3563	128219	6.48932	5.00794e-66	1.29426e-65	ENSMUST00000127786	Xist	UTR3
4089	peak_4089	chr4	133591478	133591728	332.771	+	133591478	133591728	0	1	250	0	51	1894	6.48899	1.73848e-101	6.699e-101	ENSMUST00000030661	Gpn2	UTR3
2245	peak_2245	chr2	75936362	75936687	231.54	-	75936362	75936687	0	1	325	0	32	1195	6.48862	7.29006e-71	1.99297e-70	ENSMUST00000099996	Ttc30b	UTR3
4404	peak_4404	chr4	68761763	68762238	147.889	-	68761763	68762238	0	1	475	0	62	2338	6.48814	1.50543e-45	3.02694e-45	ENSMUST00000030036	Brinp1	UTR3
399	peak_399	chr1	151818374	151819324	Inf	+	151818374	151819324	0	1	950	0	637	24416	6.48687	0	0	ENSMUST00000191070	Edem3	LastExon
15990	peak_15990	chr17	5753026	5753426	248.352	+	5753026	5753426	0	1	400	0	38	1741	6.48666	6.01234e-76	1.73265e-75	ENSMUST00000089185	Zdhhc14	LastExon
7754	peak_7754	chr7	19564945	19565420	768.477	-	19564945	19565420	0	1	475	0	257	11925	6.48466	2.43598e-233	4.62637e-232	ENSMUST00000122055	Gemin7	UTR3
1748	peak_1748	chr2	138283642	138284742	Inf	+	138283642	138284742	0	1	1100	0	513	21873	6.48415	0	0	ENSMUST00000075410	Btbd3	LastExon
12168	peak_12168	chr11	29171433	29171833	392.769	-	29171433	29171833	0	1	400	0	52	1843	6.48395	1.2362e-119	5.81903e-119	ENSMUST00000129876	A630052C17Rik	UTR3
13926	peak_13926	chr13	69498033	69498558	749.962	-	69498033	69498558	0	1	525	0	139	4929	6.48317	9.88329e-228	1.73386e-226	ENSMUST00000044081	Tent4a	UTR3
1607	peak_1607	chr2	119038213	119039013	685.169	+	119038213	119039013	0	1	800	0	205	9383	6.48204	4.12967e-208	5.53923e-207	ENSMUST00000028796	Rpusd2	LastExon
13909	peak_13909	chr13	67618050	67618675	339.831	-	67618050	67618675	0	1	625	0	40	1736	6.48164	1.26768e-103	5.02088e-103	ENSMUST00000225511	Zfp729a	UTR3
7501	peak_7501	chr7	112092790	112101866	Inf	+	112092790	112101866	0	2	696129	0,8947	2381	85566	6.48147	0	0	ENSMUST00000210526	Usp47	UTR5
8942	peak_8942	chr8	3153446	3154196	806.359	-	3153446	3154196	0	1	750	0	365	12989	6.48139	8.11736e-245	1.8265e-243	ENSMUST00000091291	Insr	UTR3
13234	peak_13234	chr12	81294602	81314387	48.892	-	81294602	81314387	0	2	72128	0,19657	19	834	6.48106	1.63933e-15	1.9144e-15	ENSMUST00000183102	Slc8a3	UTR3
17353	peak_17353	chr18	38589042	38589192	58.828	-	38589042	38589192	0	1	150	0	5	202	6.47961	1.5615e-18	1.95434e-18	ENSMUST00000025295	Spry4	UTR3
3612	peak_3612	chr3	148816460	148817560	Inf	-	148816460	148817560	0	1	1100	0	1137	40561	6.479	0	0	ENSMUST00000199750	Adgrl2	UTR3
3544	peak_3544	chr3	115712507	115712932	603.988	-	115712507	115712932	0	1	425	0	146	6168	6.47767	1.55266e-183	1.51851e-182	ENSMUST00000055676	S1pr1	LastExon
6652	peak_6652	chr6	50295104	50295279	59.0357	-	50295104	50295279	0	1	175	0	5	192	6.47746	1.35e-18	1.69229e-18	ENSMUST00000141466	Osbpl3	UTR3
3695	peak_3695	chr4	32579943	32580893	Inf	+	32579943	32580893	0	1	950	0	1023	40043	6.47677	0	0	ENSMUST00000171600	Bach2	LastExon
9599	peak_9599	chr9	56898145	56898570	94.4429	+	56898145	56898570	0	1	425	0	8	670	6.47549	2.38123e-29	3.71409e-29	ENSMUST00000217052	Cspg4	UTR5
13462	peak_13462	chr13	35969344	35969844	130.572	+	35969344	35969844	0	1	500	0	13	848	6.47339	2.63378e-40	4.94309e-40	ENSMUST00000132661	Ppp1r3g	LastExon
7034	peak_7034	chr7	12929358	12929533	37.795	+	12929358	12929533	0	1	175	0	3	171	6.47235	3.8931e-12	4.19335e-12	ENSMUST00000045870	Rnf225	UTR3
5639	peak_5639	chr5	36475844	36476869	Inf	-	36475844	36476869	0	1	1025	0	754	28465	6.47221	0	0	ENSMUST00000119916	Tada2b	UTR3
12070	peak_12070	chr11	121708084	121714715	26.7052	+	121708084	121714715	0	2	31,19	0,6612	1	91	6.47208	9.01246e-09	9.13951e-09	ENSMUST00000125580	Metrnl	Exon
14492	peak_14492	chr14	38370401	38370726	134.011	-	38370401	38370726	0	1	325	0	66	2446	6.47164	2.39608e-41	4.55617e-41	ENSMUST00000173780	Nrg3	UTR3
6776	peak_6776	chr6	91761933	91762208	45.9054	-	91761933	91762208	0	1	275	0	4	269	6.47128	1.32899e-14	1.51736e-14	ENSMUST00000162293	Grip2	UTR3
10977	peak_10977	chr10	20399703	20399878	46.9767	-	20399703	20399878	0	1	175	0	4	157	6.4708	6.27513e-15	7.22124e-15	ENSMUST00000169016	Pde7b	UTR3
15509	peak_15509	chr16	23613024	23613474	128.235	+	23613024	23613474	0	1	450	0	14	501	6.4698	1.34544e-39	2.49719e-39	ENSMUST00000211349	Rtp4	LastExon
1784	peak_1784	chr2	152148892	152149092	274.923	+	152148892	152149092	0	1	200	0	35	1385	6.46959	5.51314e-84	1.7374e-83	ENSMUST00000089112	Tcf15	UTR3
11201	peak_11201	chr10	80834181	80834356	45.0728	-	80834181	80834356	0	1	175	0	4	179	6.4694	2.37941e-14	2.70227e-14	ENSMUST00000053986	Lingo3	UTR3
1414	peak_1414	chr2	49548440	49550251	Inf	+	49548440	49550251	0	2	324326	0,1485	758	26265	6.46913	0	0	ENSMUST00000092123	Epc2	LastExon
2159	peak_2159	chr2	35401928	35402478	293.073	-	35401928	35402478	0	1	550	0	35	1220	6.46865	1.77249e-89	5.9738e-89	ENSMUST00000102794	Ggta1	UTR3
17365	peak_17365	chr18	43531532	43531832	642.504	-	43531532	43531832	0	1	300	0	138	5454	6.46856	3.38616e-195	3.86329e-194	ENSMUST00000238185	Jakmip2	UTR3
6380	peak_6380	chr6	108664628	108665678	797.574	+	108664628	108665678	0	1	1050	0	212	9940	6.46717	3.76696e-242	8.05766e-241	ENSMUST00000204550	Bhlhe40	UTR5
10934	peak_10934	chr10	4368273	4368948	810.672	-	4368273	4368948	0	1	675	0	215	8023	6.46675	4.0015e-246	9.19259e-245	ENSMUST00000215860	Zbtb2	UTR3
11959	peak_11959	chr11	109395948	109396573	942.652	+	109395948	109396573	0	1	625	0	409	14046	6.46663	4.08875e-286	1.71185e-284	ENSMUST00000020930	Gna13	LastExon
5826	peak_5826	chr5	113794428	113794803	106.88	-	113794428	113794803	0	1	375	0	10	688	6.46617	4.01211e-33	6.69739e-33	ENSMUST00000067853	Tmem119	UTR3
18075	peak_18075	chr19	58796675	58797625	180.457	-	58796675	58797625	0	1	950	0	228	8188	6.46611	2.09702e-55	4.75531e-55	ENSMUST00000066285	Hspa12a	UTR3
5054	peak_5054	chr5	63898349	63898599	81.7644	+	63898349	63898599	0	1	250	0	7	471	6.46597	1.6785e-25	2.43477e-25	ENSMUST00000199667	0610040J01Rik	LastExon
2643	peak_2643	chr2	165377688	165378138	Inf	-	165377688	165378138	0	1	450	0	530	20793	6.4639	0	0	ENSMUST00000103084	Zfp334	UTR3
2663	peak_2663	chr2	167103477	167103752	308.578	-	167103477	167103752	0	1	275	0	35	1279	6.46198	3.60905e-94	1.28419e-93	ENSMUST00000059826	Kcnb1	UTR3
11115	peak_11115	chr10	75636818	75636868	26.4455	-	75636818	75636868	0	1	50	0	1	78	6.46121	1.08008e-08	1.09423e-08	ENSMUST00000219733	Susd2	UTR3
3800	peak_3800	chr4	57883161	57893588	913.973	+	57883161	57893588	0	3	41,39,720	0,3127,9707	172	6245	6.46119	2.0262e-277	7.35871e-276	ENSMUST00000098066	Pakap	UTR3
15654	peak_15654	chr16	87503576	87503926	290.153	+	87503576	87503926	0	1	350	0	37	1358	6.46081	1.35628e-88	4.52036e-88	ENSMUST00000175717	B130034C11Rik	UTR5
6513	peak_6513	chr6	147033086	147033511	165.928	+	147033086	147033511	0	1	425	0	18	714	6.45971	5.2144e-51	1.12377e-50	ENSMUST00000036194	Rep15	LastExon
10300	peak_10300	chr9	85324563	85325113	164.761	-	85324563	85325113	0	1	550	0	19	726	6.45935	1.17615e-50	2.52335e-50	ENSMUST00000187711	Tent5a	LastExon
1988	peak_1988	chr2	6100099	6100374	62.6254	-	6100099	6100374	0	1	275	0	5	377	6.45773	1.09343e-19	1.40562e-19	ENSMUST00000054254	Proser2	UTR3
7595	peak_7595	chr7	128270793	128271075	38.5484	+	128270793	128271075	0	2	159,41	0,241	3	242	6.45674	2.2987e-12	2.48763e-12	ENSMUST00000206703	Slc5a2	Exon
13300	peak_13300	chr12	98434493	98435268	880.074	-	98434493	98435268	0	1	775	0	490	18033	6.45668	3.8451e-267	1.17826e-265	ENSMUST00000110113	Kcnk10	UTR3
16183	peak_16183	chr17	32977282	32977707	510.046	+	32977282	32977707	0	1	425	0	77	2679	6.4563	4.08481e-155	2.8893e-154	ENSMUST00000039132	Zfp472	LastExon
7436	peak_7436	chr7	98715212	98717137	Inf	+	98715212	98717137	0	1	1925	0	1713	58776	6.45565	0	0	ENSMUST00000033009	Thap12	LastExon
13048	peak_13048	chr12	112681157	112681432	161.01	+	112681157	112681432	0	1	275	0	20	1170	6.45488	1.60845e-49	3.39801e-49	ENSMUST00000169593	Zbtb42	UTR3
17034	peak_17034	chr18	37480042	37480092	25.4915	+	37480042	37480092	0	1	50	0	1	97	6.45431	2.09876e-08	2.11981e-08	ENSMUST00000051442	Pcdhb16	LastExon
2484	peak_2484	chr2	136082978	136083278	364.323	-	136082978	136083278	0	1	300	0	58	2033	6.45428	4.95843e-111	2.1276e-110	ENSMUST00000077200	Pak7	UTR3
16801	peak_16801	chr17	78853238	78853888	507.276	-	78853238	78853888	0	1	650	0	147	5315	6.4537	2.81513e-154	1.97176e-153	ENSMUST00000024884	Eif2ak2	UTR3
8987	peak_8987	chr8	20887807	20887907	25.4964	-	20887807	20887907	0	1	100	0	1	62	6.45312	2.09152e-08	2.11261e-08	ENSMUST00000180355	Gm20796	UTR3
8669	peak_8669	chr8	88257260	88257660	Inf	+	88257260	88257660	0	1	400	0	360	12504	6.45081	0	0	ENSMUST00000118952	Tent4b	LastExon
14977	peak_14977	chr15	102281302	102281744	605.446	+	102281302	102281744	0	1	442	0	105	5582	6.45023	5.62428e-184	5.52669e-183	ENSMUST00000051341	Mfsd5	LastExon
12457	peak_12457	chr11	86502020	86502720	Inf	-	86502020	86502720	0	1	700	0	373	13897	6.44908	0	0	ENSMUST00000020824	Rps6kb1	UTR3
16262	peak_16262	chr17	45436381	45439222	791.242	+	45436381	45439222	0	2	808,92	0,2749	349	11979	6.44855	3.13034e-240	6.49458e-239	ENSMUST00000233673	B230354K17Rik	UTR5
3933	peak_3933	chr4	115041376	115042176	620.453	+	115041376	115042176	0	1	800	0	222	7742	6.44836	1.60734e-188	1.67861e-187	ENSMUST00000141933	Stil	UTR3
16025	peak_16025	chr17	14943590	14944365	966.757	+	14943590	14944365	0	1	775	0	297	11777	6.44819	2.02697e-293	9.48854e-292	ENSMUST00000174004	1600012H06Rik	UTR5
248	peak_248	chr1	89153231	89153781	559.084	+	89153231	89153781	0	1	550	0	109	4247	6.44792	5.95837e-170	5.00047e-169	ENSMUST00000066279	Sh3bp4	LastExon
7673	peak_7673	chr7	4784694	4784994	267.331	-	4784694	4784994	0	1	300	0	35	1475	6.44771	1.0904e-81	3.35234e-81	ENSMUST00000168578	Tmem238	UTR3
16215	peak_16215	chr17	34977913	34978288	125.788	+	34977913	34978288	0	1	375	0	12	550	6.44724	7.41968e-39	1.3618e-38	ENSMUST00000151136	Gm10501	UTR3
13210	peak_13210	chr12	78963844	78964894	619.098	-	78963844	78964894	0	1	1050	0	485	29755	6.4471	4.13299e-188	4.29458e-187	ENSMUST00000056660	Tmem229b	UTR3
10502	peak_10502	chr10	3963489	3964514	677.883	+	3963489	3964514	0	1	1025	0	290	11207	6.44678	6.61788e-206	8.6464e-205	ENSMUST00000042438	Plekhg1	LastExon
9159	peak_9159	chr8	79278227	79281529	802.583	-	79278227	79281529	0	2	97353	0,2949	201	8108	6.4465	1.13254e-243	2.503e-242	ENSMUST00000210231	Mmaa	Exon
9757	peak_9757	chr9	101074726	101102226	Inf	+	101074726	101102226	0	2	6941656	0,25844	2192	81857	6.44646	0	0	ENSMUST00000085177	Msl2	LastExon
18107	peak_18107	chrX	6635293	6635818	114.476	+	6635293	6635818	0	1	525	0	46	1736	6.44615	1.99457e-35	3.46197e-35	ENSMUST00000089520	Shroom4	UTR3
3247	peak_3247	chr3	25432810	25433810	655.681	-	25432810	25433810	0	1	1000	0	163	6164	6.4456	3.48594e-199	4.17127e-198	ENSMUST00000075054	Nlgn1	UTR3
6983	peak_6983	chr6	149041597	149044882	Inf	-	149041597	149044882	0	2	150400	0,2885	424	14757	6.44514	0	0	ENSMUST00000150436	Dennd5b	UTR3
16182	peak_16182	chr17	32810293	32821151	569.093	+	32810293	32821151	0	4	45,30,72,178	0,1276,9020,10680	94	3226	6.4448	5.59753e-173	4.85284e-172	ENSMUST00000201876	Zfp799	UTR3
538	peak_538	chr1	188212502	188212702	65.6064	+	188212502	188212702	0	1	200	0	6	221	6.44449	1.35701e-20	1.78032e-20	ENSMUST00000110938	Esrrg	UTR3
10779	peak_10779	chr10	81391108	81391358	138.124	+	81391108	81391358	0	1	250	0	15	656	6.44403	1.35969e-42	2.63412e-42	ENSMUST00000125635	Gm48552	UTR3
17004	peak_17004	chr18	37335345	37335595	57.4339	+	37335345	37335595	0	1	250	0	5	311	6.44198	4.14694e-18	5.13673e-18	ENSMUST00000061717	Pcdhb6	LastExon
13577	peak_13577	chr13	63898896	63899796	802.441	+	63898896	63899796	0	1	900	0	191	6470	6.44194	1.25376e-243	2.76109e-242	ENSMUST00000095724	Ercc6l2	UTR3
8798	peak_8798	chr8	110222087	110222712	608.54	+	110222087	110222712	0	1	625	0	103	3583	6.44186	6.50045e-185	6.473e-184	ENSMUST00000056972	Cmtr2	LastExon
5467	peak_5467	chr5	142666922	142667222	687.074	+	142666922	142667222	0	1	300	0	275	9388	6.44088	1.09297e-208	1.47987e-207	ENSMUST00000110778	Wipi2	LastExon
17161	peak_17161	chr18	64386797	64386872	46.8047	+	64386797	64386872	0	1	75	0	4	172	6.44019	7.07925e-15	8.13555e-15	ENSMUST00000175965	Onecut2	UTR3
12885	peak_12885	chr12	76329804	76330354	347.873	+	76329804	76330354	0	1	550	0	44	1521	6.44009	4.68356e-106	1.90481e-105	ENSMUST00000154078	Akap5	LastExon
11046	peak_11046	chr10	44439751	44439926	45.3817	-	44439751	44439926	0	1	175	0	4	174	6.43974	1.91776e-14	2.18144e-14	ENSMUST00000218369	Prdm1	LastExon
5387	peak_5387	chr5	134987338	134987476	28.8793	+	134987338	134987476	0	1	138	0	2	128	6.43958	1.97702e-09	2.02517e-09	ENSMUST00000094245	Cldn3	UTR3
18529	peak_18529	chrX	104084508	104084583	174.776	-	104084508	104084583	0	1	75	0	23	835	6.43934	1.09675e-53	2.43838e-53	ENSMUST00000056502	Nexmif	LastExon
15104	peak_15104	chr15	65994911	65995636	131.405	-	65994911	65995636	0	1	725	0	303	13601	6.43934	1.4741e-40	2.77386e-40	ENSMUST00000070256	Kcnq3	UTR3
14255	peak_14255	chr14	56902957	56911207	Inf	+	56902957	56911207	0	2	595130	0,8120	1915	65018	6.43916	0	0	ENSMUST00000223669	Zmym2	LastExon
10656	peak_10656	chr10	68779077	68779252	65.6219	+	68779077	68779252	0	1	175	0	6	226	6.43915	1.3422e-20	1.76127e-20	ENSMUST00000218918	Tmem26	UTR3
9745	peak_9745	chr9	95229016	95229266	186.845	+	95229016	95229266	0	1	250	0	19	692	6.4391	2.44073e-57	5.67564e-57	ENSMUST00000033463	Slc9a9	LastExon
15968	peak_15968	chr16	96592603	96608074	414.182	-	96592603	96608074	0	2	811,39	0,15432	133	5099	6.43865	4.09789e-126	2.08316e-125	ENSMUST00000232829	Dscam	UTR3
833	peak_833	chr1	106542377	106542802	476.584	-	106542377	106542802	0	1	425	0	90	3221	6.43803	5.44267e-145	3.41882e-144	ENSMUST00000112751	Bcl2	UTR3
832	peak_832	chr1	106541677	106542177	852.669	-	106541677	106542177	0	1	500	0	210	7242	6.43794	7.76782e-259	2.09439e-257	ENSMUST00000112751	Bcl2	UTR3
7326	peak_7326	chr7	66049171	66049696	375.751	+	66049171	66049696	0	1	525	0	80	3669	6.43753	1.73263e-114	7.71896e-114	ENSMUST00000176209	Pcsk6	UTR3
451	peak_451	chr1	169934044	169934394	122.842	+	169934044	169934394	0	1	350	0	14	500	6.43699	5.7993e-38	1.0492e-37	ENSMUST00000159701	Gm15852	UTR3
14640	peak_14640	chr14	73520638	73520963	186.27	-	73520638	73520963	0	1	325	0	21	960	6.43674	3.64586e-57	8.45482e-57	ENSMUST00000043813	Nudt15	UTR3
14721	peak_14721	chr15	6796262	6797312	825.379	+	6796262	6797312	0	1	1050	0	438	14805	6.43461	1.42197e-250	3.43616e-249	ENSMUST00000061656	Rictor	UTR3
6930	peak_6930	chr6	127087665	127088115	263.884	-	127087665	127088115	0	1	450	0	31	1322	6.4341	1.20276e-80	3.65498e-80	ENSMUST00000200988	Tigar	UTR3
10549	peak_10549	chr10	22664489	22664539	26.6144	+	22664489	22664539	0	1	50	0	1	85	6.43347	9.60166e-09	9.73331e-09	ENSMUST00000159174	Slc2a12	UTR5
14146	peak_14146	chr14	30690562	30690887	461.503	+	30690562	30690887	0	1	325	0	71	2461	6.43289	1.96527e-140	1.18495e-139	ENSMUST00000228686	Rft1	UTR3
6749	peak_6749	chr6	87579592	87580317	509.351	-	87579592	87580317	0	1	725	0	109	3706	6.43197	6.63828e-155	4.67945e-154	ENSMUST00000050887	Prokr1	UTR3
9875	peak_9875	chr9	114405176	114406026	364.088	+	114405176	114406026	0	1	850	0	48	3016	6.43151	5.83986e-111	2.50293e-110	ENSMUST00000111820	Tmppe	LastExon
14629	peak_14629	chr14	70306293	70306668	494.826	-	70306293	70306668	0	1	375	0	67	2799	6.42946	1.64321e-150	1.10283e-149	ENSMUST00000022688	Slc39a14	UTR3
8160	peak_8160	chr7	118844646	118845346	874.168	-	118844646	118845346	0	1	700	0	617	23814	6.42789	2.37479e-265	7.06786e-264	ENSMUST00000126792	Knop1	UTR3
2093	peak_2093	chr2	27885749	27885974	47.3591	-	27885749	27885974	0	1	225	0	4	214	6.42672	4.80219e-15	5.53957e-15	ENSMUST00000154246	2810430I11Rik	UTR3
14848	peak_14848	chr15	78940642	78941042	766.632	+	78940642	78941042	0	1	400	0	188	9433	6.42541	8.84229e-233	1.66237e-231	ENSMUST00000138880	Nol12	UTR3
6995	peak_6995	chr7	4479051	4479276	187.4	+	4479051	4479276	0	1	225	0	20	1105	6.42508	1.65901e-57	3.8641e-57	ENSMUST00000164987	Eps8l1	UTR3
964	peak_964	chr1	139337037	139337387	90.7965	-	139337037	139337387	0	1	350	0	9	400	6.42494	3.03889e-28	4.6507e-28	ENSMUST00000196402	Crb1	Exon
17724	peak_17724	chr19	40845867	40846592	827.812	+	40845867	40846592	0	1	725	0	367	12261	6.4249	2.61927e-251	6.36239e-250	ENSMUST00000119316	Ccnj	LastExon
15924	peak_15924	chr16	85862244	85863069	357.966	-	85862244	85863069	0	1	825	0	53	1822	6.42427	4.14852e-109	1.74393e-108	ENSMUST00000023611	Adamts5	UTR3
17369	peak_17369	chr18	46167276	46167751	734.689	-	46167276	46167751	0	1	475	0	192	6753	6.42362	4.14519e-223	6.86481e-222	ENSMUST00000237526	Trim36	UTR3
13024	peak_13024	chr12	110793301	110794476	Inf	+	110793301	110794476	0	1	1175	0	759	27768	6.42342	0	0	ENSMUST00000095410	Wdr20	LastExon
9926	peak_9926	chr9	121979186	121979361	44.2794	+	121979186	121979361	0	1	175	0	4	155	6.42251	4.14675e-14	4.68345e-14	ENSMUST00000043011	Fam198a	UTR3
3689	peak_3689	chr4	28963890	28964390	Inf	+	28963890	28964390	0	1	500	0	396	13688	6.42034	0	0	ENSMUST00000108191	Epha7	LastExon
17758	peak_17758	chr19	43615405	43615580	35.6237	+	43615405	43615580	0	1	175	0	3	161	6.4192	1.77571e-11	1.88885e-11	ENSMUST00000057178	Nkx2-3	UTR3
17066	peak_17066	chr18	37656756	37657106	206.786	+	37656756	37657106	0	1	350	0	24	845	6.41904	2.25181e-63	5.63815e-63	ENSMUST00000097608	3222401L13Rik	UTR5
12923	peak_12923	chr12	83734035	83734785	996.403	+	83734035	83734785	0	1	750	0	447	16792	6.41898	2.07877e-302	1.12914e-300	ENSMUST00000101225	Psen1	LastExon
593	peak_593	chr1	21402602	21402802	37.3485	-	21402602	21402802	0	1	200	0	3	149	6.4172	5.3184e-12	5.71437e-12	ENSMUST00000174183	Kcnq5	UTR3
5673	peak_5673	chr5	43758132	43758857	Inf	-	43758132	43758857	0	1	725	0	473	15751	6.41561	0	0	ENSMUST00000121736	Fbxl5	UTR3
5251	peak_5251	chr5	115097225	115098275	Inf	+	115097225	115098275	0	1	1050	0	1145	39836	6.41517	0	0	ENSMUST00000100848	Gm10401	UTR3
12400	peak_12400	chr11	77518516	77518991	103.959	-	77518516	77518991	0	1	475	0	10	617	6.4136	3.08879e-32	5.07158e-32	ENSMUST00000094004	Abhd15	LastExon
8783	peak_8783	chr8	108956847	108957347	350.75	+	108956847	108957347	0	1	500	0	47	1620	6.41343	6.31302e-107	2.59242e-106	ENSMUST00000043896	Zfhx3	LastExon
10180	peak_10180	chr9	57253146	57254121	553.597	-	57253146	57254121	0	1	975	0	100	4761	6.41317	2.71942e-168	2.24184e-167	ENSMUST00000215298	1700017B05Rik	UTR3
15991	peak_15991	chr17	5753501	5753726	68.4768	+	5753501	5753726	0	1	225	0	7	277	6.41202	1.82084e-21	2.43463e-21	ENSMUST00000089185	Zdhhc14	UTR3
2343	peak_2343	chr2	110362099	110362324	79.7821	-	110362099	110362324	0	1	225	0	8	310	6.41193	6.71192e-25	9.6207e-25	ENSMUST00000099626	Fibin	UTR3
11631	peak_11631	chr11	65828168	65828893	734.65	+	65828168	65828893	0	1	725	0	249	10101	6.41149	4.26441e-223	7.0497e-222	ENSMUST00000018491	Zkscan6	LastExon
11843	peak_11843	chr11	90035616	90036066	312.07	+	90035616	90036066	0	1	450	0	43	1489	6.41092	3.16792e-95	1.1414e-94	ENSMUST00000092788	Tmem100	LastExon
15056	peak_15056	chr15	39871777	39872702	Inf	-	39871777	39872702	0	1	925	0	953	34611	6.40998	0	0	ENSMUST00000110305	Lrp12	UTR3
8814	peak_8814	chr8	111134646	111135121	801.387	+	111134646	111135121	0	1	475	0	247	9189	6.40983	2.61854e-243	5.73278e-242	ENSMUST00000144377	Pdpr	UTR3
3857	peak_3857	chr4	89691628	89692178	154.786	+	89691628	89692178	0	1	550	0	322	12499	6.40948	1.23047e-47	2.53902e-47	ENSMUST00000131576	Dmrta1	UTR5
9336	peak_9336	chr8	120205533	120205733	38.3131	-	120205533	120205733	0	1	200	0	3	147	6.40941	2.71097e-12	2.92834e-12	ENSMUST00000183235	A330074K22Rik	UTR3
8313	peak_8313	chr7	140812844	140812994	53.1568	-	140812844	140812994	0	1	150	0	5	193	6.40898	8.27107e-17	9.95853e-17	ENSMUST00000106052	Zfp941	LastExon
11795	peak_11795	chr11	84040834	84041484	641.11	+	84040834	84041484	0	1	650	0	213	7467	6.40781	8.94696e-195	1.01517e-193	ENSMUST00000184239	Synrg	UTR5
15809	peak_15809	chr16	30956901	30957551	544.7	-	30956901	30957551	0	1	650	0	165	9247	6.40649	1.33931e-165	1.06909e-164	ENSMUST00000055389	Xxylt1	UTR3
17373	peak_17373	chr18	46504920	46524782	Inf	-	46504920	46524782	0	2	1469681	0,19181	1549	51479	6.40595	0	0	ENSMUST00000036226	Fem1c	UTR3
1496	peak_1496	chr2	82258309	82258984	285.9	+	82258309	82258984	0	1	675	0	43	1450	6.40512	2.6291e-87	8.6222e-87	ENSMUST00000047527	Zfp804a	LastExon
3246	peak_3246	chr3	19226682	19227832	Inf	-	19226682	19227832	0	1	1150	0	1352	45673	6.40475	0	0	ENSMUST00000091314	Pde7a	UTR3
10307	peak_10307	chr9	87192197	87193597	623.693	-	87192197	87193597	0	2	725,25	0,1375	320	11064	6.40419	1.67328e-189	1.77736e-188	ENSMUST00000093802	Cep162	UTR3
12216	peak_12216	chr11	50814160	50815260	Inf	-	50814160	50815260	0	1	1100	0	1237	40655	6.40242	0	0	ENSMUST00000109135	Zfp354c	UTR3
14520	peak_14520	chr14	52311546	52312421	901.04	-	52311546	52312421	0	1	875	0	577	20762	6.40126	1.69523e-273	5.75297e-272	ENSMUST00000058326	Sall2	UTR3
14825	peak_14825	chr15	76370869	76371319	388.819	+	76370869	76371319	0	1	450	0	57	2413	6.40026	1.93936e-118	8.9881e-118	ENSMUST00000023213	Hgh1	UTR3
1605	peak_1605	chr2	118927946	118928471	385.279	+	118927946	118928471	0	1	525	0	52	1882	6.40003	2.2768e-117	1.04583e-116	ENSMUST00000110837	Chst14	UTR3
14004	peak_14004	chr13	97899744	97929588	54.4924	-	97899744	97929588	0	2	72178	0,29666	5	223	6.39851	3.24933e-17	3.94591e-17	ENSMUST00000225663	Arhgef28	UTR3
1716	peak_1716	chr2	129810656	129827867	648.952	+	129810656	129827867	0	2	581,94	0,17117	234	9065	6.39817	3.78263e-197	4.42677e-196	ENSMUST00000165413	Stk35	Exon
1053	peak_1053	chr1	163386058	163386558	396.761	-	163386058	163386558	0	1	500	0	63	2416	6.39782	7.67362e-121	3.65739e-120	ENSMUST00000186402	Gorab	UTR3
14265	peak_14265	chr14	59629814	59630539	604.839	+	59629814	59630539	0	1	725	0	1257	58924	6.39669	8.58376e-184	8.42149e-183	ENSMUST00000053949	Shisa2	LastExon
18514	peak_18514	chrX	103460374	103460724	231.462	-	103460374	103460724	0	1	350	0	369	12363	6.39629	7.69787e-71	2.10323e-70	ENSMUST00000153883	Xist	UTR3
6669	peak_6669	chr6	58905883	58906158	82.6455	-	58905883	58906158	0	1	275	0	43	1602	6.39629	9.05904e-26	1.32199e-25	ENSMUST00000205101	Nap1l5	UTR3
1774	peak_1774	chr2	150239953	150240378	180.712	+	150239953	150240378	0	1	425	0	23	776	6.39618	1.75585e-55	3.98359e-55	ENSMUST00000073782	Zfp937	UTR3
8619	peak_8619	chr8	76908545	76908720	45.2754	+	76908545	76908720	0	1	175	0	4	162	6.39489	2.06579e-14	2.34824e-14	ENSMUST00000128862	Nr3c2	LastExon
1862	peak_1862	chr2	158638825	158639211	408.306	+	158638825	158639211	0	1	386	0	59	3646	6.39484	2.46529e-124	1.22352e-123	ENSMUST00000183731	Actr5	UTR3
10543	peak_10543	chr10	19609432	19609957	361.986	+	19609432	19609957	0	1	525	0	46	1889	6.39373	2.52209e-110	1.07453e-109	ENSMUST00000164591	Ifngr1	UTR3
9925	peak_9925	chr9	121978436	121978636	64.8014	+	121978436	121978636	0	1	200	0	6	293	6.39298	2.38534e-20	3.11061e-20	ENSMUST00000213773	Fam198a	UTR3
11054	peak_11054	chr10	53278080	53281434	357.556	-	53278080	53281434	0	2	164,86	0,3268	54	1784	6.3926	5.51811e-109	2.31706e-108	ENSMUST00000219673	Cep85l	UTR3
9199	peak_9199	chr8	86844463	86844813	852.869	-	86844463	86844813	0	1	350	0	333	11168	6.39245	6.74488e-259	1.82386e-257	ENSMUST00000210029	N4bp1	UTR3
16585	peak_16585	chr17	32773360	32774660	Inf	-	32773360	32774660	0	1	1300	0	1260	41680	6.39169	0	0	ENSMUST00000057501	Zfp871	UTR3
7992	peak_7992	chr7	73942118	73943293	974.918	-	73942118	73943293	0	1	1175	0	1198	44033	6.39161	6.63745e-296	3.31534e-294	ENSMUST00000026896	St8sia2	UTR3
18260	peak_18260	chrX	102083278	102083853	302.179	+	102083278	102083853	0	1	575	0	41	1382	6.39027	3.1181e-92	1.08444e-91	ENSMUST00000101339	Nhsl2	UTR3
3134	peak_3134	chr3	121734401	121734626	130.718	+	121734401	121734626	0	1	225	0	14	482	6.39027	2.37877e-40	4.46717e-40	ENSMUST00000199997	F3	UTR3
230	peak_230	chr1	86372944	86373019	28.0394	+	86372944	86373019	0	1	75	0	2	87	6.38919	3.55396e-09	3.62497e-09	ENSMUST00000137643	C130036L24Rik	UTR5
14799	peak_14799	chr15	60828820	60828970	36.3996	+	60828820	60828970	0	1	150	0	3	121	6.38875	1.03204e-11	1.10315e-11	ENSMUST00000181910	9930014A18Rik	UTR5
9384	peak_9384	chr8	123954058	123954333	473.677	-	123954058	123954333	0	1	275	0	78	2781	6.38844	4.11131e-144	2.56523e-143	ENSMUST00000075578	Abcb10	UTR3
1200	peak_1200	chr2	3452957	3453857	572.969	+	3452957	3453857	0	1	900	0	127	4253	6.38818	3.75763e-174	3.30384e-173	ENSMUST00000102988	Dclre1c	LastExon
9892	peak_9892	chr9	118897462	118897687	144.087	+	118897462	118897687	0	1	225	0	16	560	6.38761	2.1303e-44	4.22051e-44	ENSMUST00000124360	Itga9	UTR3
17730	peak_17730	chr19	41558376	41559451	Inf	+	41558376	41559451	0	1	1075	0	925	31379	6.38746	0	0	ENSMUST00000237976	Lcor	UTR5
13046	peak_13046	chr12	112679957	112680057	29.0404	+	112679957	112680057	0	1	100	0	2	184	6.3873	1.76701e-09	1.81125e-09	ENSMUST00000169593	Zbtb42	LastExon
6138	peak_6138	chr6	15799717	15800192	289.02	+	15799717	15800192	0	1	475	0	46	1538	6.38715	2.98594e-88	9.91816e-88	ENSMUST00000120512	Mdfic	LastExon
12614	peak_12614	chr11	107876704	107876879	44.7328	-	107876704	107876879	0	1	175	0	4	174	6.38693	3.01703e-14	3.42042e-14	ENSMUST00000039071	Cacng5	UTR3
3356	peak_3356	chr3	73050125	73050700	166.157	-	73050125	73050700	0	1	575	0	24	842	6.38679	4.44661e-51	9.59184e-51	ENSMUST00000059407	Slitrk3	LastExon
14465	peak_14465	chr14	27486551	27486926	668.736	-	27486551	27486926	0	1	375	0	195	6398	6.38611	3.88738e-203	4.90357e-202	ENSMUST00000050480	Ccdc66	Exon
12442	peak_12442	chr11	84519008	84519333	136.562	-	84519008	84519333	0	1	325	0	15	621	6.38518	4.04018e-42	7.77369e-42	ENSMUST00000018842	Lhx1	UTR3
4403	peak_4403	chr4	65381052	65381352	64.1986	-	65381052	65381352	0	1	300	0	6	229	6.38493	3.63435e-20	4.72384e-20	ENSMUST00000084496	Astn2	UTR3
5816	peak_5816	chr5	112914527	112914802	131.733	-	112914527	112914802	0	1	275	0	13	795	6.38401	1.17342e-40	2.20984e-40	ENSMUST00000200332	Grk3	UTR3
17006	peak_17006	chr18	37342176	37342501	95.7339	+	37342176	37342501	0	1	325	0	10	377	6.38367	9.65737e-30	1.51785e-29	ENSMUST00000053037	Pcdhb7	LastExon
15060	peak_15060	chr15	43021960	43022435	329.21	-	43021960	43022435	0	1	475	0	65	2140	6.38321	2.07686e-100	7.90318e-100	ENSMUST00000063492	Rspo2	UTR3
11841	peak_11841	chr11	89016664	89016889	47.6608	+	89016664	89016889	0	1	225	0	4	218	6.3832	3.88454e-15	4.49437e-15	ENSMUST00000000284	Trim25	LastExon
1436	peak_1436	chr2	61649871	61650321	764.556	+	61649871	61650321	0	1	450	0	175	5706	6.38284	3.77835e-232	7.0114e-231	ENSMUST00000141544	Tank	UTR5
12841	peak_12841	chr12	61843412	61844312	608.92	+	61843412	61844312	0	1	900	0	133	4385	6.38207	4.98708e-185	4.97666e-184	ENSMUST00000055815	Lrfn5	LastExon
18005	peak_18005	chr19	36733311	36734036	326.816	-	36733311	36734036	0	1	725	0	53	1848	6.38205	1.10228e-99	4.15384e-99	ENSMUST00000087321	Ppp1r3c	UTR3
14879	peak_14879	chr15	82141107	82141432	300.631	+	82141107	82141432	0	1	325	0	46	2656	6.38186	9.16356e-92	3.16982e-91	ENSMUST00000229411	Ccdc134	UTR3
3453	peak_3453	chr3	96058325	96058400	28.3266	-	96058325	96058400	0	1	75	0	2	105	6.38091	2.90897e-09	2.97051e-09	ENSMUST00000015891	Vps45	UTR5
10898	peak_10898	chr10	123739115	123739415	53.3301	+	123739115	123739415	0	1	300	0	5	191	6.38085	7.32884e-17	8.83149e-17	ENSMUST00000050756	Fam19a2	UTR3
2098	peak_2098	chr2	28825373	28825973	Inf	-	28825373	28825973	0	1	600	0	423	13854	6.38017	0	0	ENSMUST00000037117	Gtf3c4	UTR3
2575	peak_2575	chr2	156123713	156124013	252.834	-	156123713	156124013	0	1	300	0	32	1069	6.37996	2.65318e-77	7.74907e-77	ENSMUST00000184469	Nfs1	UTR3
1102	peak_1102	chr1	173928850	173928950	27.1731	-	173928850	173928950	0	1	100	0	2	87	6.37966	6.50228e-09	6.60834e-09	ENSMUST00000129829	Ifi203	Exon
3877	peak_3877	chr4	101002944	101003869	Inf	+	101002944	101003869	0	1	925	0	1625	60404	6.3793	0	0	ENSMUST00000030257	Cachd1	LastExon
10862	peak_10862	chr10	102545142	102545742	335.262	+	102545142	102545742	0	1	600	0	42	1406	6.37767	3.06293e-102	1.1916e-101	ENSMUST00000055355	Rassf9	LastExon
5358	peak_5358	chr5	128602505	128603130	419.291	+	128602505	128603130	0	1	625	0	70	2686	6.37764	1.16397e-127	6.03895e-127	ENSMUST00000117102	Fzd10	LastExon
18264	peak_18264	chrX	103037898	103037948	23.9792	+	103037898	103037948	0	1	50	0	1	58	6.37741	6.01241e-08	6.04714e-08	ENSMUST00000120745	Gm9143	UTR5
13087	peak_13087	chr12	11241250	11241825	477.563	-	11241250	11241825	0	1	575	0	114	3779	6.37733	2.75187e-145	1.73503e-144	ENSMUST00000218547	Gen1	UTR3
1770	peak_1770	chr2	150003629	150003854	82.4252	+	150003629	150003854	0	1	225	0	9	334	6.37727	1.05735e-25	1.54011e-25	ENSMUST00000109934	Syndig1	UTR3
529	peak_529	chr1	185464201	185465201	847.71	+	185464201	185465201	0	1	1000	0	942	31967	6.3765	2.46765e-257	6.51201e-256	ENSMUST00000061093	Slc30a10	LastExon
4091	peak_4091	chr4	134425697	134425997	200.63	+	134425697	134425997	0	1	300	0	25	849	6.37578	1.64091e-61	4.02049e-61	ENSMUST00000105870	Pafah2	UTR3
16601	peak_16601	chr17	33241518	33242718	953.491	-	33241518	33242718	0	1	1200	0	305	10001	6.37508	2.10711e-289	9.34704e-288	ENSMUST00000008830	Zfp955a	UTR3
14584	peak_14584	chr14	60965908	60966458	590.12	-	60965908	60966458	0	1	550	0	667	24545	6.37472	2.42846e-179	2.27018e-178	ENSMUST00000111234	Tnfrsf19	UTR3
12302	peak_12302	chr11	67855822	67855922	37.7081	-	67855822	67855922	0	1	100	0	3	171	6.37348	4.13791e-12	4.45369e-12	ENSMUST00000129961	Usp43	UTR3
3034	peak_3034	chr3	95617231	95617731	737.127	+	95617231	95617731	0	1	500	0	253	8767	6.37304	7.55841e-224	1.26637e-222	ENSMUST00000177399	Golph3l	LastExon
2426	peak_2426	chr2	125739385	125740685	Inf	-	125739385	125740685	0	1	1300	0	1320	46817	6.37259	0	0	ENSMUST00000053699	Secisbp2l	UTR3
1824	peak_1824	chr2	155630707	155631040	29.9956	+	155630707	155631040	0	2	170,30	0,303	2	206	6.37239	9.07197e-10	9.34173e-10	ENSMUST00000092995	Myh7b	Exon
13563	peak_13563	chr13	58409577	58409877	333.551	+	58409577	58409877	0	1	300	0	56	1912	6.37196	1.00875e-101	3.90159e-101	ENSMUST00000224479	Rmi1	LastExon
4285	peak_4285	chr4	34810662	34811787	Inf	-	34810662	34811787	0	1	1125	0	1653	54703	6.37155	0	0	ENSMUST00000047950	Zfp292	LastExon
11338	peak_11338	chr10	122079338	122079763	199.719	-	122079338	122079763	0	1	425	0	23	778	6.37096	3.09762e-61	7.56181e-61	ENSMUST00000140299	Rxylt1	UTR3
8697	peak_8697	chr8	94779665	94780040	153.689	+	94779665	94780040	0	1	375	0	17	942	6.37092	2.64683e-47	5.43155e-47	ENSMUST00000150307	Cx3cl1	UTR3
4791	peak_4791	chr4	149980974	149981549	221.914	-	149980974	149981549	0	1	575	0	25	1341	6.37049	5.96362e-68	1.57466e-67	ENSMUST00000030830	H6pd	UTR3
14660	peak_14660	chr14	88467571	88468096	58.8054	-	88467571	88468096	0	1	525	0	28	1066	6.37042	1.58635e-18	1.98517e-18	ENSMUST00000192557	Pcdh20	LastExon
1642	peak_1642	chr2	120422283	120422633	74.7192	+	120422283	120422633	0	1	350	0	7	268	6.36975	2.31126e-23	3.21568e-23	ENSMUST00000136993	Ganc	UTR5
12119	peak_12119	chr11	6473473	6474398	Inf	-	6473473	6474398	0	1	925	0	517	17378	6.3693	0	0	ENSMUST00000179343	Purb	UTR3
5165	peak_5165	chr5	105608264	105608989	576.074	+	105608264	105608989	0	1	725	0	96	3110	6.36742	4.33226e-175	3.84171e-174	ENSMUST00000067924	Lrrc8c	LastExon
3197	peak_3197	chr3	142547856	142548181	75.4956	+	142547856	142548181	0	1	325	0	7	248	6.36732	1.34251e-23	1.87738e-23	ENSMUST00000045097	Gbp7	UTR3
14839	peak_14839	chr15	76900945	76901305	639.338	+	76900945	76901305	0	1	360	0	113	4573	6.36705	3.07782e-194	3.46693e-193	ENSMUST00000230214	Gm49527	UTR3
4963	peak_4963	chr5	31642168	31642468	114.763	+	31642168	31642468	0	1	300	0	13	442	6.3664	1.63181e-35	2.8371e-35	ENSMUST00000201999	Mrpl33	UTR5
16013	peak_16013	chr17	8992276	8992551	139.456	+	8992276	8992551	0	1	275	0	15	770	6.36555	5.36889e-43	1.04621e-42	ENSMUST00000136954	1700010I14Rik	UTR5
13915	peak_13915	chr13	67670336	67670861	559.036	-	67670336	67670861	0	1	525	0	97	3268	6.36426	6.1659e-170	5.16998e-169	ENSMUST00000137496	Zfp738	LastExon
15821	peak_15821	chr16	32232786	32238592	Inf	-	32232786	32238592	0	2	482193	0,5613	1501	55581	6.36401	0	0	ENSMUST00000042732	Fbxo45	UTR3
10463	peak_10463	chr9	119753912	119754187	95.1323	-	119753912	119754187	0	1	275	0	10	357	6.36344	1.47119e-29	2.30314e-29	ENSMUST00000070617	Scn11a	UTR3
2504	peak_2504	chr2	148406595	148406695	28.5286	-	148406595	148406695	0	1	100	0	2	112	6.36172	2.52609e-09	2.5825e-09	ENSMUST00000099270	Thbd	LastExon
9641	peak_9641	chr9	60737711	60738161	139.378	+	60737711	60738161	0	1	450	0	15	730	6.36097	5.66767e-43	1.10385e-42	ENSMUST00000038407	Larp6	LastExon
6895	peak_6895	chr6	122453211	122453536	873.21	-	122453211	122453536	0	1	325	0	197	6379	6.36087	4.62638e-265	1.37252e-263	ENSMUST00000068242	Rimklb	UTR3
4390	peak_4390	chr4	62449427	62449677	127.171	-	62449427	62449677	0	1	250	0	15	595	6.36037	2.82752e-39	5.22149e-39	ENSMUST00000146108	Wdr31	UTR3
10584	peak_10584	chr10	41451528	41455112	704.137	+	41451528	41455112	0	2	540,85	0,3499	267	11162	6.35969	7.41406e-214	1.08084e-212	ENSMUST00000216656	Zbtb24	LastExon
18407	peak_18407	chrX	21081373	21081723	153.73	-	21081373	21081723	0	1	350	0	17	650	6.35889	2.57224e-47	5.28023e-47	ENSMUST00000040667	Zfp300	UTR3
14390	peak_14390	chr14	103076183	103076383	60.0637	+	103076183	103076383	0	1	200	0	6	209	6.35886	6.57234e-19	8.29884e-19	ENSMUST00000022721	Cln5	LastExon
11342	peak_11342	chr10	125227963	125230640	257.626	-	125227963	125230640	0	2	326,49	0,2628	33	1074	6.35852	9.41158e-79	2.79884e-78	ENSMUST00000105257	Slc16a7	UTR3
8403	peak_8403	chr8	14896664	14897439	826.798	+	14896664	14897439	0	1	775	0	283	11394	6.35852	5.30445e-251	1.28514e-249	ENSMUST00000027554	Cln8	LastExon
10436	peak_10436	chr9	109829992	109830517	349.65	-	109829992	109830517	0	1	525	0	46	1751	6.3573	1.35796e-106	5.55557e-106	ENSMUST00000125451	3000002C10Rik	UTR3
9802	peak_9802	chr9	107577925	107578225	139.283	+	107577925	107578225	0	1	300	0	15	865	6.3571	6.05875e-43	1.17928e-42	ENSMUST00000144392	Hyal1	Exon
2688	peak_2688	chr2	168476534	168476759	80.6202	-	168476534	168476759	0	1	225	0	8	311	6.3569	3.73454e-25	5.38156e-25	ENSMUST00000151292	Nfatc2	UTR3
12078	peak_12078	chr11	3331049	3331174	93.5833	-	3331049	3331174	0	1	125	0	10	381	6.35647	4.33997e-29	6.73929e-29	ENSMUST00000155332	Gm12592	UTR3
11357	peak_11357	chr10	127661267	127661567	273.416	-	127661267	127661567	0	1	300	0	31	1782	6.35617	1.57363e-83	4.93739e-83	ENSMUST00000099157	Nab2	UTR3
13206	peak_13206	chr12	76596169	76596344	37.2724	-	76596169	76596344	0	1	175	0	3	187	6.35508	5.60817e-12	6.02397e-12	ENSMUST00000166101	Sptb	UTR3
5034	peak_5034	chr5	44101816	44102241	196.612	+	44101816	44102241	0	1	425	0	21	867	6.35416	2.69327e-60	6.51245e-60	ENSMUST00000072800	Gm16401	UTR5
3540	peak_3540	chr3	110249551	110250101	517.01	-	110249551	110250101	0	1	550	0	168	7159	6.35382	3.18089e-157	2.31406e-156	ENSMUST00000106567	Prmt6	UTR3
7015	peak_7015	chr7	6379302	6379402	27.2327	+	6379302	6379402	0	1	100	0	2	87	6.35143	6.23741e-09	6.34087e-09	ENSMUST00000108559	Zfp78	LastExon
11476	peak_11476	chr11	42626807	42627082	43.4266	+	42626807	42627082	0	1	275	0	9	337	6.35044	7.5409e-14	8.45843e-14	ENSMUST00000007797	Gabrb2	LastExon
10858	peak_10858	chr10	100096148	100097148	998.515	+	100096148	100097148	0	1	1000	0	297	9537	6.35009	4.71175e-303	2.61264e-301	ENSMUST00000105283	Kitl	UTR3
14219	peak_14219	chr14	52213525	52213750	83.712	+	52213525	52213750	0	1	225	0	8	287	6.34924	4.30007e-26	6.31222e-26	ENSMUST00000180857	Gm26590	UTR5
5340	peak_5340	chr5	124901464	124901589	44.3183	+	124901464	124901589	0	1	125	0	4	146	6.34807	4.03552e-14	4.55893e-14	ENSMUST00000141533	Zfp664	UTR5
2812	peak_2812	chr3	32933197	32933622	358.776	+	32933197	32933622	0	1	425	0	59	1905	6.34708	2.36051e-109	9.94317e-109	ENSMUST00000072312	Usp13	LastExon
3312	peak_3312	chr3	54897067	54897292	155.726	-	54897067	54897292	0	1	225	0	17	571	6.34682	6.39058e-48	1.3238e-47	ENSMUST00000070342	Sertm1	UTR3
472	peak_472	chr1	172370178	172370853	517.659	+	172370178	172370853	0	1	675	0	85	3093	6.34655	2.02389e-157	1.47639e-156	ENSMUST00000056136	Kcnj10	UTR3
12460	peak_12460	chr11	87078081	87080621	689.718	-	87078081	87080621	0	2	69456	0,2084	173	6047	6.34609	1.72824e-209	2.36756e-208	ENSMUST00000020801	Smg8	Exon
630	peak_630	chr1	37760897	37760947	22.5059	-	37760897	37760947	0	1	50	0	1	55	6.34589	1.67364e-07	1.67905e-07	ENSMUST00000088072	Tsga10	UTR3
11018	peak_11018	chr10	39891142	39892217	534.889	-	39891142	39892217	0	1	1075	0	128	4252	6.34501	1.24895e-162	9.5995e-162	ENSMUST00000178563	Mfsd4b4	UTR3
15899	peak_15899	chr16	64766034	64766884	994.085	-	64766034	64766884	0	1	850	0	401	12773	6.34473	1.04847e-301	5.62942e-300	ENSMUST00000076991	4930453N24Rik	UTR3
10863	peak_10863	chr10	102545792	102546067	136.74	+	102545792	102546067	0	1	275	0	19	609	6.34401	3.56804e-42	6.87234e-42	ENSMUST00000055355	Rassf9	LastExon
12801	peak_12801	chr12	40223532	40224997	81.9561	+	40223532	40224997	0	2	21329	0,1136	8	290	6.344	1.46753e-25	2.13189e-25	ENSMUST00000171356	Gm7008	UTR5
3592	peak_3592	chr3	133466203	133468053	Inf	-	133466203	133468053	0	1	1850	0	1116	37360	6.3434	0	0	ENSMUST00000197211	Tet2	UTR3
18406	peak_18406	chrX	21080473	21080598	61.9716	-	21080473	21080598	0	1	125	0	6	221	6.34318	1.728e-19	2.21145e-19	ENSMUST00000040667	Zfp300	UTR3
6279	peak_6279	chr6	71508959	71510434	Inf	+	71508959	71510434	0	1	1475	0	652	21114	6.34316	0	0	ENSMUST00000114178	Rnf103	UTR3
17498	peak_17498	chr18	84012777	84013702	958.381	-	84012777	84013702	0	1	925	0	417	16614	6.34289	6.95374e-291	3.15219e-289	ENSMUST00000175783	Tshz1	UTR3
14868	peak_14868	chr15	80929359	80929834	872.117	+	80929359	80929834	0	1	475	0	207	6677	6.34235	9.90532e-265	2.9293e-263	ENSMUST00000228525	Tnrc6b	UTR5
73	peak_73	chr1	36106052	36106446	905.646	+	36106052	36106446	0	1	394	0	233	7992	6.34213	6.82077e-275	2.36204e-273	ENSMUST00000192656	Gm37335	UTR3
17949	peak_17949	chr19	10456245	10456620	78.0458	-	10456245	10456620	0	1	375	0	7	495	6.33961	2.25664e-24	3.20527e-24	ENSMUST00000171400	Lrrc10b	UTR3
11037	peak_11037	chr10	42562862	42563437	878.857	-	42562862	42563437	0	1	575	0	725	23034	6.33899	8.98552e-267	2.73992e-265	ENSMUST00000019938	Nr2e1	UTR3
9128	peak_9128	chr8	70649135	70649685	672.792	-	70649135	70649685	0	1	550	0	167	6908	6.33858	2.30016e-204	2.94733e-203	ENSMUST00000070173	Pgpep1	UTR3
14416	peak_14416	chr14	12341891	12342641	Inf	-	12341891	12342641	0	1	750	0	1834	59646	6.33837	0	0	ENSMUST00000022262	Fezf2	UTR3
3251	peak_3251	chr3	29952223	29952273	36.5826	-	29952223	29952273	0	1	50	0	3	122	6.33733	9.07901e-12	9.71705e-12	ENSMUST00000108271	Mecom	UTR3
1416	peak_1416	chr2	49947695	49947970	90.9408	+	49947695	49947970	0	1	275	0	9	337	6.33728	2.74788e-28	4.2081e-28	ENSMUST00000028103	Lypd6b	UTR3
4568	peak_4568	chr4	124856138	124857088	911.763	-	124856138	124857088	0	1	950	0	297	13374	6.33601	9.50094e-277	3.40408e-275	ENSMUST00000064444	Maneal	UTR3
3560	peak_3560	chr3	122933600	122934575	667.795	-	122933600	122934575	0	1	975	0	130	4094	6.3358	7.48884e-203	9.41461e-202	ENSMUST00000090379	Usp53	UTR3
3151	peak_3151	chr3	127562865	127563215	664.475	+	127562865	127563215	0	1	350	0	289	10282	6.33576	7.56698e-202	9.39869e-201	ENSMUST00000195955	Zgrf1	LastExon
3601	peak_3601	chr3	141840360	141840710	579.663	-	141840360	141840710	0	1	350	0	106	3370	6.3355	3.55125e-176	3.19167e-175	ENSMUST00000106230	Bmpr1b	UTR3
2775	peak_2775	chr3	5415227	5415652	516.754	+	5415227	5415652	0	1	425	0	105	3676	6.33485	3.80268e-157	2.76317e-156	ENSMUST00000176383	Zfhx4	UTR3
9880	peak_9880	chr9	117254191	117254366	42.1597	+	117254191	117254366	0	1	175	0	4	143	6.33458	1.83188e-13	2.03553e-13	ENSMUST00000172075	Gm17396	UTR5
4376	peak_4376	chr4	58069775	58069875	54.4074	-	58069775	58069875	0	1	100	0	5	212	6.33384	3.45015e-17	4.18542e-17	ENSMUST00000042850	Svep1	Exon
16603	peak_16603	chr17	33333966	33335516	Inf	-	33333966	33335516	0	1	1550	0	972	32397	6.33306	0	0	ENSMUST00000054072	Zfp81	UTR3
14446	peak_14446	chr14	21984411	21985411	639.146	-	21984411	21985411	0	1	1000	0	135	6918	6.3323	3.52422e-194	3.96257e-193	ENSMUST00000043409	Zfp503	UTR3
15626	peak_15626	chr16	56006884	56007434	670.305	+	56006884	56007434	0	1	550	0	173	5906	6.33197	1.30382e-203	1.65248e-202	ENSMUST00000184618	Zbtb11	UTR5
14028	peak_14028	chr13	102734685	102735310	113.109	-	102734685	102735310	0	1	625	0	151	6921	6.33049	5.18151e-35	8.92701e-35	ENSMUST00000194446	Mast4	UTR3
3007	peak_3007	chr3	89855001	89855376	119.651	+	89855001	89855376	0	1	375	0	13	442	6.33022	5.38027e-37	9.58408e-37	ENSMUST00000050401	She	UTR3
6634	peak_6634	chr6	47796216	47796841	898.869	-	47796216	47796841	0	1	625	0	2174	68755	6.32982	7.77421e-273	2.59108e-271	ENSMUST00000077290	Pdia4	UTR3
1825	peak_1825	chr2	155632211	155632261	26.3812	+	155632211	155632261	0	1	50	0	1	126	6.32972	1.12964e-08	1.14407e-08	ENSMUST00000092995	Myh7b	Exon
12517	peak_12517	chr11	97746705	97747455	Inf	-	97746705	97747455	0	1	750	0	360	11467	6.32918	0	0	ENSMUST00000018685	Cwc25	UTR3
6372	peak_6372	chr6	100865978	100866801	Inf	+	100865978	100866801	0	2	105545	0,278	2730	86380	6.32888	0	0	ENSMUST00000203067	Ppp4r2	UTR5
16815	peak_16815	chr17	80274799	80275524	Inf	-	80274799	80275524	0	1	725	0	643	20359	6.32857	0	0	ENSMUST00000234733	Dhx57	UTR3
4100	peak_4100	chr4	136244191	136244416	117.579	+	136244191	136244416	0	1	225	0	13	675	6.32808	2.28544e-36	4.02762e-36	ENSMUST00000047526	Asap3	UTR3
14086	peak_14086	chr14	8055748	8056548	624.613	+	8055748	8056548	0	1	800	0	138	4483	6.32767	8.80061e-190	9.39084e-189	ENSMUST00000225234	Abhd6	UTR3
13668	peak_13668	chr13	110400192	110400717	181.453	+	110400192	110400717	0	1	525	0	261	8611	6.32662	1.04689e-55	2.38296e-55	ENSMUST00000022212	Plk2	LastExon
9064	peak_9064	chr8	48227756	48228981	Inf	-	48227756	48228981	0	1	1225	0	1085	37509	6.32604	0	0	ENSMUST00000190840	Tenm3	UTR3
4356	peak_4356	chr4	49585405	49586205	534.046	-	49585405	49586205	0	1	800	0	89	3243	6.32569	2.24976e-162	1.72207e-161	ENSMUST00000042750	Tmem246	UTR3
17807	peak_17807	chr19	46877887	46878562	431.488	+	46877887	46878562	0	1	675	0	62	2284	6.32566	2.36162e-131	1.2854e-130	ENSMUST00000235671	Cnnm2	UTR5
7388	peak_7388	chr7	82269425	82269525	27.5778	+	82269425	82269525	0	1	100	0	2	86	6.32553	4.90227e-09	4.99175e-09	ENSMUST00000179800	Sh3gl3	UTR5
6471	peak_6471	chr6	128384940	128385040	27.1148	+	128384940	128385040	0	1	100	0	2	98	6.32463	6.77251e-09	6.88072e-09	ENSMUST00000100926	Tex52	LastExon
6347	peak_6347	chr6	90381848	90382973	913.799	+	90381848	90382973	0	1	1125	0	297	9816	6.32393	2.2899e-277	8.30021e-276	ENSMUST00000203493	Zxdc	LastExon
6420	peak_6420	chr6	118429169	118429244	119.736	+	118429169	118429244	0	1	75	0	13	473	6.32258	5.0676e-37	9.03229e-37	ENSMUST00000175338	Gm25953	UTR5
12750	peak_12750	chr12	3907676	3908001	Inf	+	3907676	3908001	0	1	325	0	901	29317	6.32255	0	0	ENSMUST00000174483	Dnmt3a	UTR3
13249	peak_13249	chr12	84147455	84147555	37.2342	-	84147455	84147555	0	1	100	0	3	129	6.32196	5.75995e-12	6.18558e-12	ENSMUST00000061425	Pnma1	LastExon
1103	peak_1103	chr1	173929025	173929075	22.9121	-	173929025	173929075	0	1	50	0	1	51	6.32187	1.26229e-07	1.26698e-07	ENSMUST00000129829	Ifi203	Exon
7540	peak_7540	chr7	124397350	124397525	39.384	+	124397350	124397525	0	1	175	0	52	2116	6.3213	1.28023e-12	1.39387e-12	ENSMUST00000106437	Hs3st4	LastExon
6684	peak_6684	chr6	72206176	72206576	118.259	-	72206176	72206576	0	1	400	0	14	765	6.32128	1.42294e-36	2.5155e-36	ENSMUST00000042646	Atoh8	UTR3
13623	peak_13623	chr13	83738239	83739139	Inf	+	83738239	83739139	0	1	900	0	4787	149019	6.32058	0	0	ENSMUST00000131907	C130071C03Rik	UTR5
10286	peak_10286	chr9	77431547	77431872	548.423	-	77431547	77431872	0	1	325	0	144	4618	6.32003	1.00094e-166	8.09752e-166	ENSMUST00000183467	Lrrc1	UTR3
10591	peak_10591	chr10	42958555	42958655	27.1201	+	42958555	42958655	0	1	100	0	2	89	6.31948	6.74689e-09	6.85544e-09	ENSMUST00000105494	Scml4	UTR3
16406	peak_16406	chr17	88486651	88487126	895.14	+	88486651	88487126	0	1	475	0	273	10011	6.31936	1.04389e-271	3.43617e-270	ENSMUST00000141052	Foxn2	UTR3
11405	peak_11405	chr11	6292688	6297300	656.687	+	6292688	6297300	0	2	26349	0,4263	194	6489	6.31921	1.72365e-199	2.07719e-198	ENSMUST00000081894	Ogdh	UTR5
2422	peak_2422	chr2	125629521	125629571	27.7297	-	125629521	125629571	0	1	50	0	2	83	6.31918	4.40961e-09	4.4928e-09	ENSMUST00000110477	Shc4	UTR3
12831	peak_12831	chr12	57238437	57239437	Inf	+	57238437	57239437	0	1	1000	0	1341	42200	6.31805	0	0	ENSMUST00000139049	Prps1l3	LastExon
18629	peak_18629	chrX	167477167	167477217	27.6675	-	167477167	167477217	0	1	50	0	2	98	6.31804	4.60483e-09	4.69094e-09	ENSMUST00000112145	Frmpd4	Exon
14065	peak_14065	chr13	113594329	113616918	504.289	-	113594329	113616918	0	2	533117	0,22472	136	4295	6.3176	2.26131e-153	1.5627e-152	ENSMUST00000223993	Snx18	UTR3
13833	peak_13833	chr13	56887713	56887913	39.3843	-	56887713	56887913	0	1	200	0	3	244	6.31759	1.27993e-12	1.39363e-12	ENSMUST00000173817	Trpc7	Exon
9866	peak_9866	chr9	111272319	111274219	Inf	+	111272319	111274219	0	1	1900	0	1921	59616	6.31614	0	0	ENSMUST00000060711	Epm2aip1	LastExon
1375	peak_1375	chr2	32761994	32762244	640.968	+	32761994	32762244	0	1	250	0	132	5226	6.31609	9.89601e-195	1.12081e-193	ENSMUST00000175763	Tor2a	UTR3
9871	peak_9871	chr9	111392243	111392618	117.534	+	111392243	111392618	0	1	375	0	12	672	6.31586	2.35923e-36	4.15648e-36	ENSMUST00000196945	Trank1	UTR5
13912	peak_13912	chr13	67667536	67668611	865.982	-	67667536	67668611	0	1	1075	0	207	7415	6.31547	7.16967e-263	2.05822e-261	ENSMUST00000137496	Zfp738	UTR3
7138	peak_7138	chr7	25625035	25625551	402.954	+	25625035	25625551	0	1	516	0	61	2728	6.31493	1.02466e-122	4.99752e-122	ENSMUST00000085953	Dmac2	UTR3
5424	peak_5424	chr5	138178368	138178708	565.994	+	138178368	138178708	0	1	340	0	213	7732	6.31484	4.83876e-172	4.15826e-171	ENSMUST00000143241	Ap4m1	UTR3
16057	peak_16057	chr17	21586785	21587285	721.518	+	21586785	21587285	0	1	500	0	148	4634	6.31445	4.03717e-219	6.33136e-218	ENSMUST00000088787	Zfp948	LastExon
14488	peak_14488	chr14	34414158	34414608	Inf	-	34414158	34414608	0	1	450	0	527	17285	6.31428	0	0	ENSMUST00000049005	Bmpr1a	UTR3
1314	peak_1314	chr2	29179441	29180366	Inf	+	29179441	29180366	0	1	925	0	817	29666	6.31333	0	0	ENSMUST00000061578	Setx	LastExon
5163	peak_5163	chr5	105481924	105486189	722.578	+	105481924	105486189	0	2	4387	0,3878	188	6808	6.31289	1.92677e-219	3.03703e-218	ENSMUST00000112707	Lrrc8b	LastExon
7191	peak_7191	chr7	29778358	29778908	743.499	+	29778358	29778908	0	1	550	0	211	6623	6.31267	8.94851e-226	1.52954e-224	ENSMUST00000032802	Zfp84	UTR3
17474	peak_17474	chr18	80127511	80129011	Inf	-	80127511	80129011	0	1	1500	0	1014	35960	6.31161	0	0	ENSMUST00000066743	Adnp2	UTR3
13782	peak_13782	chr13	46689211	46693997	Inf	-	46689211	46693997	0	2	39486	0,4300	625	19809	6.31122	0	0	ENSMUST00000224203	Nup153	Exon
6856	peak_6856	chr6	119355374	119355799	903.218	-	119355374	119355799	0	1	425	0	419	14644	6.31078	3.69748e-274	1.27099e-272	ENSMUST00000187699	Adipor2	UTR3
15251	peak_15251	chr15	83227975	83228275	64.8558	-	83227975	83228275	0	1	300	0	6	308	6.31023	2.29668e-20	2.99541e-20	ENSMUST00000164614	A4galt	LastExon
4994	peak_4994	chr5	34700304	34700404	26.1923	+	34700304	34700404	0	1	100	0	2	91	6.30979	1.28881e-08	1.30414e-08	ENSMUST00000074651	Grk4	UTR3
8076	peak_8076	chr7	99925206	99925931	792.223	-	99925206	99925931	0	1	725	0	307	11974	6.3089	1.57854e-240	3.28969e-239	ENSMUST00000080817	Rnf169	UTR3
3196	peak_3196	chr3	141828454	141828854	284.286	+	141828454	141828854	0	1	400	0	36	1168	6.30848	8.08643e-87	2.63804e-86	ENSMUST00000130636	Unc5c	LastExon
3375	peak_3375	chr3	84164538	84165188	731.479	-	84164538	84165188	0	1	650	0	712	22494	6.30735	3.87193e-222	6.35017e-221	ENSMUST00000054990	Trim2	UTR3
16598	peak_16598	chr17	33018087	33019087	Inf	-	33018087	33019087	0	1	1000	0	385	11947	6.30696	0	0	ENSMUST00000087654	Zfp763	UTR3
1402	peak_1402	chr2	38960224	38960374	64.2693	+	38960224	38960374	0	1	150	0	6	264	6.30691	3.45919e-20	4.49805e-20	ENSMUST00000057279	Olfml2a	LastExon
11323	peak_11323	chr10	120091724	120091999	88.3166	-	120091724	120091999	0	1	275	0	9	298	6.30642	1.71626e-27	2.59458e-27	ENSMUST00000148241	Helb	UTR3
15979	peak_15979	chr17	3196936	3198536	Inf	+	3196936	3198536	0	1	1600	0	2307	74048	6.30608	0	0	ENSMUST00000076734	Scaf8	LastExon
2862	peak_2862	chr3	52347157	52347632	311.131	+	52347157	52347632	0	1	475	0	38	1276	6.30579	6.09396e-95	2.18887e-94	ENSMUST00000053764	Foxo1	UTR3
13332	peak_13332	chr12	102784955	102785855	Inf	-	102784955	102785855	0	1	900	0	948	33427	6.30481	0	0	ENSMUST00000045652	Btbd7	UTR3
592	peak_592	chr1	21401977	21402427	218.643	-	21401977	21402427	0	1	450	0	31	991	6.30475	5.81804e-67	1.5207e-66	ENSMUST00000174183	Kcnq5	UTR3
4209	peak_4209	chr4	154274361	154274486	72.9035	+	154274361	154274486	0	1	125	0	7	295	6.30457	8.24117e-23	1.13206e-22	ENSMUST00000030897	Megf6	UTR3
15544	peak_15544	chr16	33496433	33497733	Inf	+	33496433	33497733	0	1	1300	0	1361	42128	6.30443	0	0	ENSMUST00000089677	Zfp148	LastExon
9059	peak_9059	chr8	47668577	47669102	861.031	-	47668577	47669102	0	1	525	0	311	9702	6.30406	2.26839e-261	6.3648e-260	ENSMUST00000125536	Ing2	UTR3
473	peak_473	chr1	172371803	172372153	296.028	+	172371803	172372153	0	1	350	0	58	1891	6.30402	2.26618e-90	7.7046e-90	ENSMUST00000056136	Kcnj10	UTR3
1252	peak_1252	chr2	23399769	23400119	206.918	+	23399769	23400119	0	1	350	0	30	959	6.30361	2.05449e-63	5.14687e-63	ENSMUST00000102945	Nxph2	LastExon
1914	peak_1914	chr2	169886158	169886908	447.153	+	169886158	169886908	0	1	750	0	69	2553	6.30196	4.31682e-136	2.47543e-135	ENSMUST00000180945	Gm26883	UTR3
7955	peak_7955	chr7	63889971	63891571	Inf	-	63889971	63891571	0	1	1600	0	853	41850	6.29999	0	0	ENSMUST00000063694	Klf13	UTR3
13887	peak_13887	chr13	67390158	67390633	160.165	-	67390158	67390633	0	1	475	0	20	636	6.29993	2.89631e-49	6.10214e-49	ENSMUST00000181071	Zfp429	UTR3
15594	peak_15594	chr16	38767967	38768442	448.786	+	38767967	38768442	0	1	475	0	92	2860	6.29978	1.38249e-136	7.97932e-136	ENSMUST00000154902	B4galt4	UTR3
9476	peak_9476	chr9	22243047	22243197	218.407	+	22243047	22243197	0	1	150	0	30	962	6.29886	6.85786e-67	1.79023e-66	ENSMUST00000072465	Zfp809	LastExon
9025	peak_9025	chr8	31818027	31818352	641.673	-	31818027	31818352	0	1	325	0	197	7643	6.2985	6.04389e-195	6.87446e-194	ENSMUST00000208819	Nrg1	UTR3
4856	peak_4856	chr5	12584972	12585322	165.141	+	12584972	12585322	0	1	350	0	19	617	6.29746	9.02192e-51	1.9385e-50	ENSMUST00000195923	Sema3d	UTR5
3252	peak_3252	chr3	29952373	29952673	75.156	-	29952373	29952673	0	1	300	0	22	717	6.29713	1.70219e-23	2.37572e-23	ENSMUST00000108271	Mecom	UTR3
17950	peak_17950	chr19	10502387	10503037	899.72	-	10502387	10503037	0	1	650	0	260	7968	6.29647	4.27817e-273	1.43615e-271	ENSMUST00000235486	Sdhaf2	UTR3
12394	peak_12394	chr11	77045566	77046416	Inf	-	77045566	77046416	0	1	850	0	1126	35192	6.29641	0	0	ENSMUST00000102494	Nsrp1	UTR3
17062	peak_17062	chr18	37519202	37520152	281.465	+	37519202	37520152	0	1	950	0	37	1569	6.2964	5.78068e-86	1.86525e-85	ENSMUST00000097609	Pcdhb22	UTR5
10005	peak_10005	chr9	21243661	21243861	50.2884	-	21243661	21243861	0	1	200	0	5	185	6.29499	6.15498e-16	7.27254e-16	ENSMUST00000122088	S1pr5	UTR3
9424	peak_9424	chr9	4330436	4330761	170.639	+	4330436	4330761	0	1	325	0	19	640	6.29493	1.95601e-52	4.29139e-52	ENSMUST00000212221	Kbtbd3	LastExon
17511	peak_17511	chr18	88868949	88870824	973.77	-	88868949	88870824	0	1	1875	0	1300	46836	6.29445	1.47484e-295	7.347e-294	ENSMUST00000125362	Socs6	UTR3
620	peak_620	chr1	36266176	36266251	27.4085	-	36266176	36266251	0	1	75	0	2	90	6.29441	5.517e-09	5.61341e-09	ENSMUST00000056946	Neurl3	UTR3
10424	peak_10424	chr9	108404466	108404741	82.1552	-	108404466	108404741	0	1	275	0	9	320	6.29418	1.27686e-25	1.85707e-25	ENSMUST00000076592	Ccdc36	UTR3
17712	peak_17712	chr19	38402861	38403311	223.823	+	38402861	38403311	0	1	450	0	36	1147	6.29324	1.57884e-68	4.1938e-68	ENSMUST00000054098	Slc35g1	LastExon
5531	peak_5531	chr5	150543173	150547985	645.757	+	150543173	150547985	0	3	284,96,45	0,1721,4767	208	6487	6.29313	3.50188e-196	4.05239e-195	ENSMUST00000202313	Brca2	Exon
18440	peak_18440	chrX	53642487	53642987	720.83	-	53642487	53642987	0	1	500	0	139	6527	6.29274	6.54684e-219	1.01985e-217	ENSMUST00000088779	Rtl8a	UTR3
9927	peak_9927	chr9	122137044	122157173	857.363	+	122137044	122157173	0	2	557,18	0,20111	361	11272	6.29249	2.93098e-260	8.08994e-259	ENSMUST00000134949	Snrk	Exon
10082	peak_10082	chr9	44252712	44253262	239.388	-	44252712	44253262	0	1	550	0	29	1445	6.29234	3.09301e-73	8.64863e-73	ENSMUST00000168499	Nlrx1	UTR3
10105	peak_10105	chr9	45255836	45256011	36.3327	-	45255836	45256011	0	1	175	0	3	149	6.29185	1.08127e-11	1.15551e-11	ENSMUST00000176808	Il10ra	UTR3
10965	peak_10965	chr10	13213616	13214266	650.795	-	13213616	13214266	0	1	650	0	443	13672	6.29165	1.04791e-197	1.23333e-196	ENSMUST00000105546	Phactr2	UTR3
17638	peak_17638	chr19	10664820	10664895	22.2066	+	10664820	10664895	0	1	75	0	1	57	6.2907	2.06001e-07	2.06611e-07	ENSMUST00000055115	Vwce	UTR3
496	peak_496	chr1	178932235	178932785	886.569	+	178932235	178932785	0	1	550	0	251	7996	6.29043	4.13889e-269	1.30698e-267	ENSMUST00000160789	Kif26b	UTR3
13191	peak_13191	chr12	73108684	73109009	162.937	-	73108684	73109009	0	1	325	0	24	846	6.29033	4.18821e-50	8.93513e-50	ENSMUST00000175693	Six4	LastExon
11354	peak_11354	chr10	127331213	127331388	37.9621	-	127331213	127331388	0	1	175	0	3	222	6.28905	3.46245e-12	3.73488e-12	ENSMUST00000026474	Gli1	LastExon
17918	peak_17918	chr19	6116003	6116403	437.787	-	6116003	6116403	0	1	400	0	178	7929	6.28824	2.94494e-133	1.63344e-132	ENSMUST00000113533	Sac3d1	UTR3
10349	peak_10349	chr9	100458268	100458793	152.062	-	100458268	100458793	0	1	525	0	21	826	6.28788	8.22165e-47	1.67847e-46	ENSMUST00000125259	Il20rb	UTR3
13047	peak_13047	chr12	112680132	112680207	25.7121	+	112680132	112680207	0	1	75	0	1	111	6.28703	1.80059e-08	1.81924e-08	ENSMUST00000174780	Zbtb42	UTR3
16587	peak_16587	chr17	32775160	32775860	Inf	-	32775160	32775860	0	1	700	0	765	23474	6.28541	0	0	ENSMUST00000168337	Zfp871	UTR3
3647	peak_3647	chr4	9281510	9282110	972.679	+	9281510	9282110	0	1	600	0	529	16722	6.28512	3.16656e-295	1.56489e-293	ENSMUST00000108348	Clvs1	UTR5
9971	peak_9971	chr9	15914479	15915604	987.966	-	15914479	15915604	0	1	1125	0	1161	40859	6.28486	7.48096e-300	3.9151e-298	ENSMUST00000082170	Fat3	UTR3
9018	peak_9018	chr8	27140372	27140522	44.7873	-	27140372	27140522	0	1	150	0	4	179	6.28485	2.90405e-14	3.29368e-14	ENSMUST00000054212	Rab11fip1	UTR3
8524	peak_8524	chr8	66468316	66468916	223.441	+	66468316	66468916	0	1	600	0	34	1137	6.28479	2.06127e-68	5.46513e-68	ENSMUST00000152320	March1	UTR5
13708	peak_13708	chr13	17717836	17719380	Inf	-	17717836	17719380	0	2	1075,25	0,1519	1009	31035	6.28437	0	0	ENSMUST00000222800	Cdk13	UTR3
9311	peak_9311	chr8	115684191	115684591	152.174	-	115684191	115684591	0	1	400	0	21	686	6.28431	7.60013e-47	1.55227e-46	ENSMUST00000069009	Maf	UTR3
5514	peak_5514	chr5	147546611	147547136	819.066	+	147546611	147547136	0	1	525	0	256	7773	6.2839	1.1613e-248	2.73184e-247	ENSMUST00000175807	Pan3	UTR3
14275	peak_14275	chr14	60780366	60780416	26.277	+	60780366	60780416	0	1	50	0	2	85	6.2833	1.21488e-08	1.2298e-08	ENSMUST00000025940	C1qtnf9	UTR3
17962	peak_17962	chr19	12769696	12770421	Inf	-	12769696	12770421	0	1	725	0	1090	34115	6.28284	0	0	ENSMUST00000038627	Zfp91	UTR3
10704	peak_10704	chr10	75614956	75615256	72.3211	+	75614956	75615256	0	1	300	0	7	306	6.28156	1.23745e-22	1.69509e-22	ENSMUST00000218807	Ggt5	UTR3
10211	peak_10211	chr9	59737133	59737533	588.304	-	59737133	59737533	0	1	400	0	149	4584	6.28116	8.60546e-179	7.99642e-178	ENSMUST00000217093	Senp8	UTR3
8463	peak_8463	chr8	33386349	33417074	Inf	+	33386349	33417074	0	2	1182518	0,30207	1672	53967	6.28057	0	0	ENSMUST00000070340	Purg	LastExon
8486	peak_8486	chr8	40916573	40916748	34.099	+	40916573	40916748	0	1	175	0	3	117	6.28039	5.15822e-11	5.43475e-11	ENSMUST00000118432	Slc7a2	UTR3
12287	peak_12287	chr11	62713573	62714148	876.477	-	62713573	62714148	0	1	575	0	262	7974	6.2791	4.73716e-266	1.42582e-264	ENSMUST00000005399	Zfp287	UTR3
5714	peak_5714	chr5	73021471	73022221	Inf	-	73021471	73022221	0	1	750	0	433	13110	6.27877	0	0	ENSMUST00000094700	Fryl	UTR3
12928	peak_12928	chr12	84109161	84109486	162.517	+	84109161	84109486	0	1	325	0	19	608	6.27848	5.61451e-50	1.19561e-49	ENSMUST00000056822	Acot6	LastExon
4497	peak_4497	chr4	116821256	116821406	27.9606	-	116821256	116821406	0	1	150	0	2	157	6.27771	3.75477e-09	3.82854e-09	ENSMUST00000055436	Hpdl	LastExon
11368	peak_11368	chr10	128882944	128883644	909.792	-	128882944	128883644	0	1	700	0	256	8185	6.27737	3.77481e-276	1.3345e-274	ENSMUST00000026408	Gdf11	UTR3
10883	peak_10883	chr10	116387701	116388076	350.245	+	116387701	116388076	0	1	375	0	46	1441	6.27649	8.97413e-107	3.6787e-106	ENSMUST00000092167	Ptprb	UTR3
17699	peak_17699	chr19	34573442	34574117	555.46	+	34573442	34574117	0	1	675	0	95	2944	6.27568	7.42424e-169	6.16404e-168	ENSMUST00000102826	Ifit2	LastExon
10831	peak_10831	chr10	93845776	93845951	39.5738	+	93845776	93845951	0	1	175	0	4	154	6.27526	1.12109e-12	1.2221e-12	ENSMUST00000095333	Usp44	UTR5
11724	peak_11724	chr11	76250034	76250584	560.021	+	76250034	76250584	0	1	550	0	118	4210	6.27482	3.10234e-170	2.61065e-169	ENSMUST00000155526	Mrm3	UTR5
1583	peak_1583	chr2	117177345	117177895	946.774	+	117177345	117177895	0	1	550	0	362	11163	6.27399	2.27509e-287	9.83462e-286	ENSMUST00000028829	Spred1	LastExon
11728	peak_11728	chr11	77453451	77455626	Inf	+	77453451	77455626	0	1	2175	0	1722	59144	6.27383	0	0	ENSMUST00000181283	Ssh2	LastExon
3244	peak_3244	chr3	17785463	17785688	69.1393	-	17785463	17785688	0	1	225	0	7	239	6.27369	1.1458e-21	1.5381e-21	NA	NA	NA
18263	peak_18263	chrX	102084628	102085178	302.93	+	102084628	102085178	0	1	550	0	44	1356	6.27271	1.84825e-92	6.44363e-92	ENSMUST00000101339	Nhsl2	UTR3
9005	peak_9005	chr8	25767362	25768337	Inf	-	25767362	25768337	0	1	975	0	669	20168	6.27252	0	0	ENSMUST00000038498	Bag4	UTR3
16225	peak_16225	chr17	35384194	35384569	57.5783	+	35384194	35384569	0	1	375	0	29	978	6.27249	3.7489e-18	4.6474e-18	ENSMUST00000081435	H2-Q4	UTR3
9783	peak_9783	chr9	106373818	106374418	582.355	+	106373818	106374418	0	1	600	0	216	8697	6.27133	5.42604e-177	4.93857e-176	ENSMUST00000172306	Dusp7	LastExon
2169	peak_2169	chr2	37428499	37429524	Inf	-	37428499	37429524	0	1	1025	0	436	13831	6.27047	0	0	ENSMUST00000112932	Zbtb6	UTR3
310	peak_310	chr1	110137960	110138535	196.196	+	110137960	110138535	0	1	575	0	23	732	6.27039	3.59867e-60	8.69269e-60	ENSMUST00000131464	Cdh7	UTR3
7145	peak_7145	chr7	27476535	27477310	428.868	+	27476535	27477310	0	1	775	0	74	2654	6.26945	1.46527e-130	7.9037e-130	ENSMUST00000068641	Sertad3	LastExon
9999	peak_9999	chr9	21034489	21034539	23.8146	-	21034489	21034539	0	1	50	0	1	53	6.26932	6.74123e-08	6.77797e-08	ENSMUST00000180870	Gm26592	UTR3
14377	peak_14377	chr14	84532926	84534201	787.521	+	84532926	84534201	0	1	1275	0	317	9590	6.26918	4.18183e-239	8.56173e-238	ENSMUST00000071370	Pcdh17	LastExon
5128	peak_5128	chr5	96781455	96781905	684.509	+	96781455	96781905	0	1	450	0	309	9378	6.2676	6.55618e-208	8.75615e-207	ENSMUST00000036019	Fras1	LastExon
14287	peak_14287	chr14	61209587	61210662	919.545	+	61209587	61210662	0	1	1075	0	285	8861	6.26634	4.13314e-279	1.54627e-277	ENSMUST00000119943	Sacs	LastExon
7175	peak_7175	chr7	28268480	28269165	Inf	+	28268480	28269165	0	1	685	0	917	30175	6.26625	0	0	ENSMUST00000059596	Eid2	LastExon
344	peak_344	chr1	132507972	132508122	49.7638	+	132507972	132508122	0	1	150	0	5	183	6.26619	8.89394e-16	1.04617e-15	ENSMUST00000188789	Tmem81	LastExon
18074	peak_18074	chr19	58237753	58238228	285.028	-	58237753	58238228	0	1	475	0	45	1405	6.26605	4.8256e-87	1.57757e-86	ENSMUST00000169850	Gfra1	UTR3
10068	peak_10068	chr9	42520709	42520759	24.887	-	42520709	42520759	0	1	50	0	1	95	6.26595	3.19804e-08	3.22312e-08	ENSMUST00000034515	Grik4	UTR3
15762	peak_15762	chr16	17527981	17528356	536.251	-	17527981	17528356	0	1	375	0	156	8995	6.26577	4.83104e-163	3.73629e-162	ENSMUST00000231548	Thap7	UTR3
17320	peak_17320	chr18	36505753	36506103	127.072	-	36505753	36506103	0	1	350	0	15	486	6.26572	3.02902e-39	5.59027e-39	ENSMUST00000025363	Hbegf	UTR3
7016	peak_7016	chr7	6393416	6393941	570.79	+	6393416	6393941	0	1	525	0	139	4574	6.26493	1.71597e-173	1.49604e-172	ENSMUST00000208949	Zfp28	UTR3
5554	peak_5554	chr5	8397172	8397972	695.651	-	8397172	8397972	0	1	800	0	1067	32009	6.26489	2.77248e-211	3.87502e-210	ENSMUST00000168500	Dbf4	UTR3
8860	peak_8860	chr8	121118395	121118595	78.0131	+	121118395	121118595	0	1	200	0	8	278	6.26474	2.30872e-24	3.27873e-24	ENSMUST00000054691	Foxc2	UTR3
3904	peak_3904	chr4	107414047	107414347	751.587	+	107414047	107414347	0	1	300	0	288	9069	6.26465	3.18798e-228	5.61923e-227	ENSMUST00000149366	Ndc1	UTR3
10058	peak_10058	chr9	40911221	40917164	43.9879	-	40911221	40917164	0	2	9166	0,5777	4	166	6.2629	5.08979e-14	5.7322e-14	ENSMUST00000034521	Jhy	Exon
4142	peak_4142	chr4	145829204	145829654	160.49	+	145829204	145829654	0	1	450	0	18	796	6.26251	2.30912e-49	4.87105e-49	ENSMUST00000122051	Znf41-ps	UTR5
11803	peak_11803	chr11	85345668	85346343	730.144	+	85345668	85346343	0	1	675	0	349	10500	6.26172	9.8656e-222	1.60249e-220	ENSMUST00000020835	Ppm1d	LastExon
1272	peak_1272	chr2	25577205	25577330	26.3608	+	25577205	25577330	0	1	125	0	1	143	6.26155	1.14596e-08	1.16041e-08	ENSMUST00000181730	Gm26702	UTR5
15419	peak_15419	chr16	5286632	5286732	26.3197	+	5286632	5286732	0	1	100	0	2	81	6.26151	1.17916e-08	1.1939e-08	ENSMUST00000140000	Gm15983	UTR5
7037	peak_7037	chr7	12971735	12972235	627.081	+	12971735	12972235	0	1	500	0	161	5065	6.26137	1.57701e-190	1.69735e-189	ENSMUST00000128293	Zfp324	UTR3
9747	peak_9747	chr9	95696196	95696246	23.4855	+	95696196	95696246	0	1	50	0	1	55	6.26113	8.4741e-08	8.51431e-08	ENSMUST00000015498	Pcolce2	UTR3
4533	peak_4533	chr4	119538788	119539088	113.583	-	119538788	119539088	0	1	300	0	14	452	6.26083	3.72189e-35	6.42954e-35	ENSMUST00000137671	Frg2f1	UTR3
11862	peak_11862	chr11	95491822	95492572	Inf	+	95491822	95492572	0	1	750	0	1228	37123	6.26047	0	0	ENSMUST00000107722	Spop	LastExon
13169	peak_13169	chr12	69584961	69585586	696.758	-	69584961	69585586	0	1	625	0	167	5813	6.25952	1.27836e-211	1.79887e-210	ENSMUST00000182396	Sos2	UTR3
13026	peak_13026	chr12	110868423	110869098	518.597	+	110868423	110869098	0	1	675	0	109	3949	6.2588	1.05318e-157	7.7069e-157	ENSMUST00000222460	Zfp839	LastExon
2231	peak_2231	chr2	70713281	70714056	Inf	-	70713281	70714056	0	1	775	0	655	19513	6.25858	0	0	ENSMUST00000135128	Tlk1	UTR3
16835	peak_16835	chr17	85612652	85613002	190.903	-	85612652	85613002	0	1	350	0	26	1115	6.25705	1.44096e-58	3.40778e-58	ENSMUST00000176556	Six3os1	UTR3
8446	peak_8446	chr8	26979607	26980457	802.064	+	26979607	26980457	0	1	850	0	499	28323	6.25633	1.63448e-243	3.58681e-242	ENSMUST00000154256	Zfp703	LastExon
2808	peak_2808	chr3	32366149	32366574	159.244	+	32366149	32366574	0	1	425	0	21	684	6.25544	5.50634e-49	1.1558e-48	NA	NA	NA
14755	peak_14755	chr15	31617079	31617629	623.086	+	31617079	31617629	0	1	550	0	153	5182	6.25485	2.55906e-189	2.70589e-188	ENSMUST00000160146	Fam173b	UTR5
615	peak_615	chr1	33800682	33803332	Inf	-	33800682	33803332	0	1	2650	0	2617	78451	6.25484	0	0	ENSMUST00000044455	Zfp451	UTR3
9993	peak_9993	chr9	20499692	20500442	Inf	-	20499692	20500442	0	1	750	0	1414	42504	6.2535	0	0	ENSMUST00000068296	Zfp266	LastExon
14662	peak_14662	chr14	88468696	88469296	250.712	-	88468696	88469296	0	1	600	0	39	1260	6.25275	1.16181e-76	3.37528e-76	ENSMUST00000192557	Pcdh20	LastExon
8694	peak_8694	chr8	94602429	94623457	938.036	+	94602429	94623457	0	2	1624	0,20404	419	13033	6.25274	1.02713e-284	4.19659e-283	ENSMUST00000211983	Rspry1	UTR5
1364	peak_1364	chr2	32455203	32455928	418.628	+	32455203	32455928	0	1	725	0	75	2870	6.25249	1.84566e-127	9.55979e-127	ENSMUST00000048431	Naif1	LastExon
8456	peak_8456	chr8	31235751	31236126	555.612	+	31235751	31236126	0	1	375	0	187	6318	6.25161	6.67744e-169	5.54647e-168	ENSMUST00000162162	Fut10	UTR5
12163	peak_12163	chr11	23651042	23655722	709.522	-	23651042	23655722	0	2	13287	0,4393	193	5755	6.25155	1.73153e-215	2.58494e-214	ENSMUST00000020523	Pex13	Exon
13299	peak_13299	chr12	91808417	91809792	1015.37	-	91808417	91809792	0	1	1375	0	654	20098	6.2514	3.67783e-308	2.21037e-306	ENSMUST00000166691	Sel1l	UTR3
5913	peak_5913	chr5	123623223	123630835	Inf	-	123623223	123630835	0	3	47117611	0,4070,7001	1365	42766	6.25075	0	0	ENSMUST00000144121	Clip1	UTR3
14733	peak_14733	chr15	12269505	12270355	948.521	+	12269505	12270355	0	1	850	0	403	13992	6.25068	6.74605e-288	2.92974e-286	ENSMUST00000174160	Mtmr12	UTR3
6693	peak_6693	chr6	72614142	72615935	820.182	-	72614142	72615935	0	2	13412	0,1381	409	12506	6.24969	5.33776e-249	1.26043e-247	ENSMUST00000070524	Tgoln1	Exon
10580	peak_10580	chr10	40479761	40480686	Inf	+	40479761	40480686	0	1	925	0	352	10524	6.24946	0	0	ENSMUST00000214659	Cdk19	UTR3
3520	peak_3520	chr3	108391675	108392550	Inf	-	108391675	108392550	0	1	875	0	1203	62250	6.2493	0	0	ENSMUST00000090558	Celsr2	UTR3
3345	peak_3345	chr3	66056707	66056907	181.919	-	66056707	66056907	0	1	200	0	24	797	6.24841	7.57354e-56	1.72603e-55	ENSMUST00000107837	Veph1	UTR3
87	peak_87	chr1	37875527	37876102	369.618	+	37875527	37876102	0	1	575	0	52	1597	6.24838	1.24081e-112	5.41774e-112	ENSMUST00000041621	Lipt1	LastExon
3199	peak_3199	chr3	142892174	142892374	52.6572	+	142892174	142892374	0	1	200	0	5	178	6.24824	1.17303e-16	1.40796e-16	ENSMUST00000181882	9530052C20Rik	UTR5
7429	peak_7429	chr7	97391759	97392084	252.052	+	97391759	97392084	0	1	325	0	39	1183	6.24674	4.57105e-77	1.33317e-76	ENSMUST00000130111	Alg8	UTR5
11055	peak_11055	chr10	53319643	53349145	905.722	-	53319643	53349145	0	2	76674	0,28828	674	21149	6.24666	6.46131e-275	2.24172e-273	ENSMUST00000218596	Cep85l	UTR3
2542	peak_2542	chr2	153223154	153223454	93.9161	-	153223154	153223454	0	1	300	0	10	342	6.24622	3.44e-29	5.35114e-29	ENSMUST00000099194	Tspyl3	UTR3
12022	peak_12022	chr11	118448582	118448657	25.187	+	118448582	118448657	0	1	75	0	1	90	6.2461	2.59423e-08	2.61784e-08	ENSMUST00000142751	Gm11747	UTR3
5751	peak_5751	chr5	97884807	97885332	419.467	-	97884807	97885332	0	1	525	0	69	2063	6.24607	1.02932e-127	5.34482e-127	ENSMUST00000031281	Antxr2	UTR3
2373	peak_2373	chr2	119658426	119660493	603.275	-	119658426	119660493	0	2	33492	0,1575	173	5160	6.24602	2.55187e-183	2.48921e-182	ENSMUST00000028768	Ndufaf1	Exon
5940	peak_5940	chr5	127596263	127596638	431.563	-	127596263	127596638	0	1	375	0	69	3039	6.245	2.24044e-131	1.22087e-130	ENSMUST00000153832	Slc15a4	UTR3
13982	peak_13982	chr13	93434721	93435371	684.383	-	93434721	93435371	0	1	650	0	404	12286	6.24497	7.16992e-208	9.55528e-207	ENSMUST00000065537	Jmy	UTR3
17548	peak_17548	chr19	5571144	5571261	84.0503	+	5571144	5571261	0	1	117	0	8	538	6.24466	3.3936e-26	4.99259e-26	ENSMUST00000096318	Ap5b1	LastExon
13702	peak_13702	chr13	9878153	9878453	77.3625	-	9878153	9878453	0	1	300	0	9	332	6.24437	3.63881e-24	5.14726e-24	ENSMUST00000063093	Chrm3	LastExon
13849	peak_13849	chr13	59756308	59756833	910.473	-	59756308	59756833	0	1	525	0	483	15563	6.24358	2.34518e-276	8.32247e-275	ENSMUST00000225795	Isca1	UTR3
8454	peak_8454	chr8	31128627	31129427	Inf	+	31128627	31129427	0	1	800	0	423	16965	6.2432	0	0	ENSMUST00000217278	Rnf122	LastExon
18162	peak_18162	chrX	52798532	52798757	64.3207	+	52798532	52798757	0	1	225	0	8	262	6.24294	3.33687e-20	4.34052e-20	ENSMUST00000101588	Ccdc160	LastExon
4520	peak_4520	chr4	119178206	119178281	31.1228	-	119178206	119178281	0	1	75	0	3	120	6.24191	4.12408e-10	4.27673e-10	ENSMUST00000127574	Ermap	UTR3
8640	peak_8640	chr8	83271122	83271722	643.963	+	83271122	83271722	0	1	600	0	274	12095	6.24147	1.22627e-195	1.40508e-194	ENSMUST00000093393	Tbc1d9	LastExon
3997	peak_3997	chr4	124804726	124805201	846.517	+	124804726	124805201	0	1	475	0	218	7187	6.24103	5.6609e-257	1.48966e-255	ENSMUST00000147452	Mtf1	UTR5
4486	peak_4486	chr4	115107947	115108122	42.7926	-	115107947	115108122	0	1	175	0	4	143	6.24079	1.1764e-13	1.31267e-13	ENSMUST00000106545	Cyp4x1	UTR3
606	peak_606	chr1	30803541	30804591	Inf	-	30803541	30804591	0	1	1050	0	2103	65364	6.24064	0	0	ENSMUST00000191329	Phf3	UTR3
10299	peak_10299	chr9	85321113	85321263	43.3292	-	85321113	85321263	0	1	150	0	4	142	6.24047	8.07471e-14	9.04902e-14	ENSMUST00000187711	Tent5a	UTR3
12490	peak_12490	chr11	95568967	95569342	78.2281	-	95568967	95569342	0	1	375	0	8	432	6.23944	1.98671e-24	2.82488e-24	ENSMUST00000000122	Ngfr	UTR3
9215	peak_9215	chr8	90247639	90248489	Inf	-	90247639	90248489	0	1	850	0	823	24417	6.23937	0	0	ENSMUST00000109621	Tox3	UTR3
2419	peak_2419	chr2	125301343	125301793	489.514	-	125301343	125301793	0	1	450	0	128	3854	6.23937	6.64944e-149	4.38068e-148	ENSMUST00000103234	Fbn1	UTR3
10214	peak_10214	chr9	59970830	59971430	352.04	-	59970830	59971430	0	1	600	0	61	2161	6.23903	2.57031e-107	1.06016e-106	ENSMUST00000034829	Thsd4	UTR3
2829	peak_2829	chr3	37319907	37319982	41.1287	+	37319907	37319982	0	1	75	0	14	533	6.23845	3.7717e-13	4.15925e-13	ENSMUST00000108121	Bbs12	LastExon
12281	peak_12281	chr11	61777273	61777823	883.676	-	61777273	61777823	0	1	550	0	655	19989	6.23844	3.11972e-268	9.70341e-267	ENSMUST00000129025	Ulk2	UTR3
7615	peak_7615	chr7	131984209	131984809	461.762	+	131984209	131984809	0	1	600	0	91	3589	6.23827	1.64139e-140	9.90307e-140	ENSMUST00000045840	Gpr26	LastExon
15279	peak_15279	chr15	85898882	85899757	Inf	-	85898882	85899757	0	1	875	0	1169	44308	6.23775	0	0	ENSMUST00000226840	Celsr1	UTR3
15541	peak_15541	chr16	33241741	33242366	881.491	+	33241741	33242366	0	1	625	0	266	8708	6.23762	1.43072e-267	4.4132e-266	ENSMUST00000039733	Osbpl11	LastExon
3137	peak_3137	chr3	122276357	122278767	Inf	+	122276357	122278767	0	2	453,22	0,2388	620	18599	6.23751	0	0	ENSMUST00000035776	Dnttip2	Exon
575	peak_575	chr1	9745658	9746258	Inf	-	9745658	9746258	0	1	600	0	561	16639	6.23711	0	0	ENSMUST00000057438	Vcpip1	Exon
1023	peak_1023	chr1	158245720	158246170	192.515	-	158245720	158246170	0	1	450	0	207	7870	6.23684	4.6822e-59	1.11495e-58	ENSMUST00000004133	Brinp2	UTR3
4750	peak_4750	chr4	145214437	145214762	96.6117	-	145214437	145214762	0	1	325	0	10	422	6.23647	5.22915e-30	8.2598e-30	ENSMUST00000030336	Tnfrsf1b	UTR3
9829	peak_9829	chr9	108805866	108806266	Inf	+	108805866	108806266	0	1	400	0	707	29973	6.23559	0	0	ENSMUST00000085018	Ip6k2	LastExon
16	peak_16	chr1	12858908	12859533	181.163	+	12858908	12859533	0	1	625	0	287	9955	6.23547	1.28232e-55	2.91389e-55	ENSMUST00000088585	Sulf1	UTR3
11277	peak_11277	chr10	95387886	95387936	26.9643	-	95387886	95387936	0	1	50	0	2	84	6.23473	7.52122e-09	7.63723e-09	ENSMUST00000130784	Socs2	UTR3
7617	peak_7617	chr7	132949704	132966675	Inf	+	132949704	132966675	0	2	731169	0,16802	1030	30245	6.23388	0	0	ENSMUST00000033265	Zranb1	Exon
3300	peak_3300	chr3	53516113	53516563	259.06	-	53516113	53516563	0	1	450	0	40	1361	6.23378	3.4629e-79	1.03576e-78	ENSMUST00000199543	Frem2	UTR3
7290	peak_7290	chr7	46437372	46437572	88.5704	+	46437372	46437572	0	1	200	0	10	380	6.23378	1.43726e-27	2.17599e-27	ENSMUST00000160433	Kcnc1	UTR3
1977	peak_1977	chr2	3328973	3329848	627.548	-	3328973	3329848	0	1	875	0	138	4080	6.23339	1.13995e-190	1.22836e-189	ENSMUST00000062672	Rpp38	UTR3
15692	peak_15692	chr16	94691641	94692566	Inf	+	94691641	94692566	0	1	925	0	1281	38375	6.23311	0	0	ENSMUST00000023614	Dyrk1a	LastExon
14389	peak_14389	chr14	103075908	103076158	267.547	+	103075908	103076158	0	1	250	0	38	1163	6.233	9.38139e-82	2.88662e-81	ENSMUST00000022721	Cln5	LastExon
8178	peak_8178	chr7	121648070	121648795	732.652	-	121648070	121648795	0	1	725	0	291	10232	6.23285	1.71004e-222	2.81696e-221	ENSMUST00000046929	Usp31	UTR3
10241	peak_10241	chr9	65555810	65556435	495.177	-	65555810	65556435	0	1	625	0	88	4522	6.23242	1.28605e-150	8.64996e-150	ENSMUST00000068944	Plekho2	UTR3
7312	peak_7312	chr7	62349651	62349926	Inf	+	62349651	62349926	0	1	275	0	662	19449	6.23239	0	0	ENSMUST00000038775	Ndn	UTR3
14378	peak_14378	chr14	87505952	87511690	Inf	+	87505952	87511690	0	2	654,46	0,5692	683	20174	6.23165	0	0	ENSMUST00000170865	Tdrd3	Exon
16969	peak_16969	chr18	36953164	36953489	155.919	+	36953164	36953489	0	1	325	0	19	593	6.23151	5.58078e-48	1.15773e-47	ENSMUST00000194235	Pcdha4	UTR5
16700	peak_16700	chr17	46800815	46801690	733.554	-	46800815	46801690	0	1	875	0	233	10074	6.23029	9.12554e-223	1.50725e-221	ENSMUST00000233537	Bicral	UTR3
12381	peak_12381	chr11	76212420	76213170	572.946	-	76212420	76213170	0	1	750	0	219	7612	6.23017	3.82281e-174	3.35798e-173	ENSMUST00000169701	Glod4	UTR3
11498	peak_11498	chr11	48850235	48850335	25.9989	+	48850235	48850335	0	1	100	0	2	87	6.23009	1.47439e-08	1.49128e-08	ENSMUST00000046903	Trim7	UTR3
14097	peak_14097	chr14	20316402	20316677	436.073	+	20316402	20316677	0	1	275	0	73	2189	6.22889	9.71168e-133	5.35637e-132	ENSMUST00000224311	Nudt13	UTR3
3886	peak_3886	chr4	104741636	104742186	689.63	+	104741636	104742186	0	1	550	0	531	16034	6.22798	1.83911e-209	2.51574e-208	ENSMUST00000106830	Dab1	UTR3
18249	peak_18249	chrX	101319589	101321239	791.943	+	101319589	101321239	0	1	1650	0	875	34024	6.22646	1.92103e-240	3.9945e-239	ENSMUST00000113671	Gm21986	UTR5
12944	peak_12944	chr12	85638872	85639647	449.911	+	85638872	85639647	0	1	775	0	78	2875	6.22606	6.31284e-137	3.65717e-136	ENSMUST00000171754	Jdp2	LastExon
18120	peak_18120	chrX	9265819	9266344	470.591	+	9265819	9266344	0	1	525	0	138	4170	6.22552	3.51885e-143	2.17734e-142	ENSMUST00000069763	Lancl3	UTR3
10165	peak_10165	chr9	56618999	56619824	395.253	-	56618999	56619824	0	1	825	0	126	5735	6.224	2.19454e-120	1.03958e-119	ENSMUST00000114247	Lingo1	UTR3
18488	peak_18488	chrX	95025331	95026006	507.581	-	95025331	95026006	0	1	675	0	114	3447	6.22351	2.27544e-154	1.59495e-153	ENSMUST00000096367	Spin4	UTR3
1714	peak_1714	chr2	129630467	129630942	785.68	+	129630467	129630942	0	1	475	0	198	6486	6.22326	1.50846e-238	3.06814e-237	ENSMUST00000049262	Sirpa	UTR3
6456	peak_6456	chr6	125240547	125241047	297.243	+	125240547	125241047	0	1	500	0	47	1522	6.22321	9.71471e-91	3.31918e-90	ENSMUST00000063588	Vamp1	UTR3
5663	peak_5663	chr5	39614159	39615109	777.786	-	39614159	39615109	0	1	950	0	601	19458	6.223	3.69162e-236	7.29359e-235	ENSMUST00000053116	Hs3st1	UTR3
11109	peak_11109	chr10	71228063	71228513	993.336	-	71228063	71228513	0	1	450	0	515	14985	6.22298	1.76802e-301	9.4655e-300	ENSMUST00000092430	Tfam	UTR3
5273	peak_5273	chr5	117765763	117766088	40.5573	+	117765763	117766088	0	1	325	0	13	700	6.2225	5.63072e-13	6.18076e-13	ENSMUST00000180430	Ksr2	UTR3
17350	peak_17350	chr18	38282589	38282914	128.524	-	38282589	38282914	0	1	325	0	14	490	6.22228	1.09895e-39	2.04316e-39	ENSMUST00000193123	Pcdh12	UTR3
9007	peak_9007	chr8	25980603	25980878	94.814	-	25980603	25980878	0	1	275	0	10	318	6.22205	1.83655e-29	2.87174e-29	ENSMUST00000061850	Pomk	UTR3
7410	peak_7410	chr7	89510006	89510856	543.346	+	89510006	89510856	0	1	850	0	120	4726	6.22142	3.43806e-165	2.73154e-164	ENSMUST00000209118	Prss23	UTR3
5791	peak_5791	chr5	107909302	107909902	598.821	-	107909302	107909902	0	1	600	0	131	3889	6.22102	5.65889e-182	5.45708e-181	ENSMUST00000031198	Fam69a	UTR3
5948	peak_5948	chr5	128797259	128797659	90.9455	-	128797259	128797659	0	1	400	0	9	494	6.22077	2.73879e-28	4.19452e-28	ENSMUST00000200470	Rimbp2	Exon
10792	peak_10792	chr10	83191548	83191898	255.981	+	83191548	83191898	0	1	350	0	31	1100	6.22072	2.96292e-78	8.75253e-78	ENSMUST00000040110	Chst11	LastExon
10325	peak_10325	chr9	94519988	94537256	Inf	-	94519988	94537256	0	3	658,304,38	0,4403,17230	670	19512	6.22015	0	0	ENSMUST00000113028	1190002N15Rik	UTR3
12069	peak_12069	chr11	121707959	121708034	36.4395	+	121707959	121708034	0	1	75	0	3	158	6.21928	1.00355e-11	1.07301e-11	ENSMUST00000125580	Metrnl	Exon
18567	peak_18567	chrX	136983115	136983265	35.6064	-	136983115	136983265	0	1	150	0	3	131	6.21894	1.7973e-11	1.9116e-11	ENSMUST00000129807	Slc25a53	LastExon
12846	peak_12846	chr12	65106246	65113828	634.651	+	65106246	65113828	0	2	645,55	0,7527	218	6800	6.21837	8.08185e-193	8.93608e-192	ENSMUST00000222540	Fancm	UTR3
12267	peak_12267	chr11	60864451	60865026	971.834	-	60864451	60865026	0	1	575	0	441	14902	6.21773	5.74943e-295	2.81149e-293	ENSMUST00000168218	Tmem11	UTR3
3628	peak_3628	chr3	155087195	155087795	315.875	-	155087195	155087795	0	1	600	0	77	2317	6.21748	2.24381e-96	8.17131e-96	ENSMUST00000066568	Fpgt	LastExon
14807	peak_14807	chr15	73571514	73571614	26.2269	+	73571514	73571614	0	1	100	0	2	84	6.21744	1.25804e-08	1.27328e-08	ENSMUST00000173292	Dennd3	UTR3
10331	peak_10331	chr9	96436933	96437183	52.1064	-	96436933	96437183	0	1	250	0	5	217	6.21713	1.7262e-16	2.06252e-16	ENSMUST00000070500	BC043934	UTR3
13946	peak_13946	chr13	74372250	74372600	187.856	-	74372250	74372600	0	1	350	0	24	732	6.21709	1.20719e-57	2.81597e-57	ENSMUST00000091481	Zfp72	LastExon
13973	peak_13973	chr13	91708801	91713344	495.733	-	91708801	91713344	0	2	513,37	0,4506	84	2482	6.21681	8.71272e-151	5.8814e-150	ENSMUST00000161491	4833422C13Rik	UTR3
13125	peak_13125	chr12	35504310	35504585	81.3568	-	35504310	35504585	0	1	275	0	9	365	6.21593	2.23243e-25	3.22972e-25	ENSMUST00000116436	Ahr	Exon
1462	peak_1462	chr2	70477004	70477529	284.244	+	70477004	70477529	0	1	525	0	60	2270	6.21492	8.32869e-87	2.71612e-86	ENSMUST00000100043	Sp5	LastExon
7406	peak_7406	chr7	88130737	88131362	205.493	+	88130737	88131362	0	1	625	0	41	1260	6.21336	5.54138e-63	1.38134e-62	ENSMUST00000155358	Grm5	LastExon
1446	peak_1446	chr2	68117803	68118803	582.17	+	68117803	68118803	0	1	1000	0	261	7895	6.21332	6.17953e-177	5.6134e-176	ENSMUST00000112346	B3galt1	UTR5
4196	peak_4196	chr4	152283603	152284103	227.405	+	152283603	152284103	0	1	500	0	30	1619	6.21311	1.30391e-69	3.50248e-69	ENSMUST00000055754	Gpr153	UTR3
8733	peak_8733	chr8	105856227	105856927	Inf	+	105856227	105856927	0	1	700	0	379	11736	6.21267	0	0	ENSMUST00000040445	Thap11	LastExon
12783	peak_12783	chr12	26478212	26478762	172.806	+	26478212	26478762	0	1	550	0	23	735	6.21205	4.32641e-53	9.55719e-53	ENSMUST00000020969	Cmpk2	UTR3
9610	peak_9610	chr9	57504801	57505376	159.661	+	57504801	57505376	0	1	575	0	20	787	6.21089	4.11707e-49	8.65747e-49	ENSMUST00000080514	Rpp25	LastExon
6033	peak_6033	chr5	139272775	139272950	37.4752	-	139272775	139272950	0	1	175	0	3	202	6.20942	4.86799e-12	5.23404e-12	ENSMUST00000126762	Adap1	UTR3
13651	peak_13651	chr13	98355844	98356444	262.939	+	98355844	98356444	0	1	600	0	46	1980	6.20898	2.32353e-80	7.03898e-80	ENSMUST00000105098	Foxd1	LastExon
10706	peak_10706	chr10	76038987	76040262	739.883	+	76038987	76040262	0	1	1275	0	274	8686	6.20878	1.11249e-224	1.87574e-223	ENSMUST00000061617	Zfp280b	LastExon
17134	peak_17134	chr18	59409915	59410290	132.557	+	59409915	59410290	0	1	375	0	15	453	6.20807	6.6085e-41	1.24871e-40	ENSMUST00000080721	Chsy3	LastExon
12569	peak_12569	chr11	102799578	102800878	991.49	-	102799578	102800878	0	1	1300	0	2065	59969	6.20789	6.37409e-301	3.40274e-299	ENSMUST00000092567	Gjc1	UTR3
4414	peak_4414	chr4	70432539	70435224	Inf	-	70432539	70435224	0	2	992,8	0,2677	1419	41174	6.20707	0	0	ENSMUST00000107359	Megf9	UTR3
10992	peak_10992	chr10	29346652	29347702	Inf	-	29346652	29347702	0	1	1050	0	1602	47006	6.20701	0	0	ENSMUST00000162335	Rnf146	UTR3
5004	peak_5004	chr5	35279290	35279465	28.0968	+	35279290	35279465	0	1	175	0	2	291	6.20582	3.4147e-09	3.4835e-09	ENSMUST00000049545	Adra2c	UTR5
9150	peak_9150	chr8	72814598	72815698	745.432	-	72814598	72815698	0	1	1100	0	226	6579	6.20577	2.31291e-226	4.00481e-225	ENSMUST00000004497	Large1	UTR3
1037	peak_1037	chr1	161818211	161818686	Inf	-	161818211	161818686	0	1	475	0	478	13935	6.2057	0	0	ENSMUST00000048377	Suco	UTR3
15113	peak_15113	chr15	71462759	71462809	25.0996	-	71462759	71462809	0	1	50	0	2	87	6.20501	2.7576e-08	2.78133e-08	ENSMUST00000022953	Fam135b	Exon
3561	peak_3561	chr3	122949129	122949729	633.196	-	122949129	122949729	0	1	600	0	117	3655	6.20421	2.22742e-192	2.44832e-191	ENSMUST00000198814	Usp53	UTR3
16399	peak_16399	chr17	87133791	87135416	834.162	+	87133791	87135416	0	1	1625	0	438	15460	6.20365	3.13982e-253	7.79973e-252	ENSMUST00000041369	Socs5	LastExon
3557	peak_3557	chr3	121158683	121159033	687.473	-	121158683	121159033	0	1	350	0	217	6348	6.20355	8.25564e-209	1.12189e-207	ENSMUST00000106465	Rwdd3	UTR3
15187	peak_15187	chr15	76853797	76854422	755.757	-	76853797	76854422	0	1	625	0	398	13442	6.20341	1.7429e-229	3.12231e-228	ENSMUST00000230315	Zfp251	UTR3
15895	peak_15895	chr16	60424892	60425142	86.0664	-	60424892	60425142	0	1	250	0	9	282	6.20264	8.28474e-27	1.23433e-26	ENSMUST00000159383	Epha6	UTR3
17417	peak_17417	chr18	62178841	62178891	23.1181	-	62178841	62178891	0	1	50	0	1	50	6.20244	1.09389e-07	1.09843e-07	ENSMUST00000053640	Adrb2	LastExon
1207	peak_1207	chr2	4611018	4612343	Inf	+	4611018	4612343	0	1	1325	0	1779	60511	6.20109	0	0	ENSMUST00000075767	Frmd4a	UTR3
6173	peak_6173	chr6	34873834	34873884	34.2461	+	34873834	34873884	0	1	50	0	3	109	6.20056	4.65238e-11	4.90791e-11	ENSMUST00000115006	Cyren	UTR3
9197	peak_9197	chr8	85640287	85642433	637.895	-	85640287	85642433	0	2	829,21	0,2125	548	16024	6.19908	8.41621e-194	9.42889e-193	ENSMUST00000215046	Neto2	UTR3
485	peak_485	chr1	177447158	177448833	697.793	+	177447158	177448833	0	1	1675	0	12787	432109	6.19903	6.20164e-212	8.77984e-211	ENSMUST00000077225	Zbtb18	LastExon
12543	peak_12543	chr11	101162678	101162978	134.498	-	101162678	101162978	0	1	300	0	17	739	6.19866	1.7064e-41	3.25037e-41	ENSMUST00000164474	Plekhh3	UTR3
13131	peak_13131	chr12	44206821	44208152	795.464	-	44206821	44208152	0	2	584,66	0,1265	228	7189	6.19863	1.64302e-241	3.47853e-240	ENSMUST00000015049	Dnajb9	UTR3
12683	peak_12683	chr11	118260600	118261325	528.355	-	118260600	118261325	0	1	725	0	102	4133	6.19849	1.18129e-160	8.89597e-160	ENSMUST00000148998	Usp36	UTR3
228	peak_228	chr1	86372419	86372669	138.474	+	86372419	86372669	0	1	250	0	19	857	6.19797	1.06453e-42	2.06682e-42	ENSMUST00000137643	C130036L24Rik	UTR5
2234	peak_2234	chr2	71527896	71537636	561.234	-	71527896	71537636	0	3	58,335,57	0,4887,9683	365	11256	6.19751	1.33113e-170	1.12677e-169	ENSMUST00000137251	Dlx1as	UTR3
13188	peak_13188	chr12	73043391	73043466	25.2335	-	73043391	73043466	0	1	75	0	2	88	6.19748	2.51194e-08	2.53494e-08	ENSMUST00000050029	Six1	UTR3
17063	peak_17063	chr18	37520277	37520452	28.1257	+	37520277	37520452	0	1	175	0	2	187	6.19747	3.34679e-09	3.41442e-09	ENSMUST00000097609	Pcdhb22	LastExon
15036	peak_15036	chr15	27731626	27732951	978.961	-	27731626	27732951	0	1	1325	0	740	23752	6.19735	3.97273e-297	2.0113e-295	ENSMUST00000227030	Trio	UTR3
18118	peak_18118	chrX	8894231	8894631	310.298	+	8894231	8894631	0	1	400	0	56	1667	6.19694	1.09014e-94	3.90061e-94	ENSMUST00000064196	B630019K06Rik	UTR3
17067	peak_17067	chr18	37657456	37657506	26.7611	+	37657456	37657506	0	1	50	0	2	89	6.19639	8.66539e-09	8.79233e-09	ENSMUST00000097608	3222401L13Rik	UTR5
15020	peak_15020	chr15	12374509	12374834	65.244	-	12374509	12374834	0	1	325	0	7	338	6.196	1.74959e-20	2.28876e-20	ENSMUST00000075317	Pdzd2	Exon
13348	peak_13348	chr12	104931248	104931448	38.672	-	104931248	104931448	0	1	200	0	4	172	6.19581	2.10789e-12	2.28339e-12	ENSMUST00000109927	Syne3	UTR3
9527	peak_9527	chr9	40212702	40212927	320.874	+	40212702	40212927	0	1	225	0	51	1502	6.1958	6.89644e-98	2.55392e-97	ENSMUST00000168832	Zfp202	UTR3
789	peak_789	chr1	85941686	85941736	26.4569	-	85941686	85941736	0	1	50	0	2	90	6.19519	1.07155e-08	1.08565e-08	ENSMUST00000086975	Gpr55	LastExon
16447	peak_16447	chr17	15544753	15545128	196.595	-	15544753	15545128	0	1	375	0	27	824	6.19346	2.72747e-60	6.59341e-60	ENSMUST00000233295	Prdm9	LastExon
7806	peak_7806	chr7	27990049	27990499	389.935	-	27990049	27990499	0	1	450	0	62	1852	6.19171	8.90607e-119	4.14926e-118	ENSMUST00000180024	Zfp850	LastExon
11781	peak_11781	chr11	82764794	82765669	970.379	+	82764794	82765669	0	1	875	0	537	16104	6.19115	1.58377e-294	7.70425e-293	ENSMUST00000056677	Zfp830	LastExon
17153	peak_17153	chr18	61990678	61990803	35.886	+	61990678	61990803	0	1	125	0	3	163	6.19071	1.47772e-11	1.57485e-11	ENSMUST00000236759	Sh3tc2	Exon
11336	peak_11336	chr10	121784340	121784890	527.638	-	121784340	121784890	0	1	550	0	228	7957	6.18999	1.94479e-160	1.46221e-159	ENSMUST00000081688	Srgap1	UTR3
4031	peak_4031	chr4	127123705	127124280	681.572	+	127123705	127124280	0	1	575	0	170	4960	6.18994	5.05981e-207	6.70479e-206	ENSMUST00000106097	Tmem35b	UTR5
4454	peak_4454	chr4	101152966	101153291	390.38	-	101152966	101153291	0	1	325	0	58	1667	6.18975	6.5268e-119	3.04687e-118	ENSMUST00000102781	Jak1	UTR3
10974	peak_10974	chr10	19002184	19002684	160.853	-	19002184	19002684	0	1	500	0	21	839	6.18967	1.79435e-49	3.7886e-49	ENSMUST00000154590	Tnfaip3	UTR3
15847	peak_15847	chr16	43862706	43863181	664.063	-	43862706	43863181	0	1	475	0	246	7160	6.18883	1.00936e-201	1.25036e-200	ENSMUST00000143858	Qtrt2	UTR3
15084	peak_15084	chr15	58048749	58052687	961.897	-	58048749	58052687	0	2	36464	0,3474	544	15622	6.18841	6.0324e-292	2.75465e-290	ENSMUST00000070143	Zhx1	UTR3
16306	peak_16306	chr17	49070178	49070678	165.116	+	49070178	49070678	0	1	500	0	21	1002	6.18828	9.18813e-51	1.97353e-50	ENSMUST00000046254	Lrfn2	Exon
8038	peak_8038	chr7	89509634	89510659	635.303	-	89509634	89510659	0	1	1025	0	160	5330	6.18823	5.11891e-193	5.68358e-192	ENSMUST00000207932	Prss23	UTR3
8279	peak_8279	chr7	131343367	131350663	495.306	-	131343367	131350663	0	2	437,13	0,7283	107	3081	6.18805	1.17526e-150	7.90766e-150	ENSMUST00000207117	2310057M21Rik	UTR3
3966	peak_3966	chr4	119467175	119467444	250.587	+	119467175	119467444	0	1	269	0	40	1216	6.18771	1.26701e-76	3.68033e-76	ENSMUST00000049994	Rimkla	UTR3
13590	peak_13590	chr13	67756284	67756534	59.8622	+	67756284	67756534	0	1	250	0	6	189	6.18752	7.56667e-19	9.54272e-19	ENSMUST00000049518	Zfp85os	UTR5
17806	peak_17806	chr19	46762895	46853952	293.219	+	46762895	46853952	0	2	498,52	0,91005	56	1942	6.1875	1.6005e-89	5.40002e-89	ENSMUST00000235378	Cnnm2	UTR5
6970	peak_6970	chr6	142565288	142565988	318.665	-	142565288	142565988	0	1	700	0	44	1354	6.18602	3.20881e-97	1.18102e-96	ENSMUST00000032374	Kcnj8	UTR3
13120	peak_13120	chr12	32204213	32204538	70.9727	-	32204213	32204538	0	1	325	0	7	269	6.18589	3.17723e-22	4.31607e-22	ENSMUST00000217915	Pik3cg	Exon
12188	peak_12188	chr11	36007230	36008380	745.129	-	36007230	36008380	0	1	1150	0	396	12003	6.18481	2.86388e-226	4.94045e-225	ENSMUST00000163524	Tenm2	UTR3
18149	peak_18149	chrX	42094749	42095124	768.463	+	42094749	42095124	0	1	375	0	305	8669	6.18467	2.46295e-233	4.67283e-232	ENSMUST00000026978	Xiap	Exon
805	peak_805	chr1	91416483	91416658	73.1135	-	91416483	91416658	0	1	175	0	8	252	6.18367	7.11297e-23	9.7867e-23	ENSMUST00000069620	Per2	UTR3
2720	peak_2720	chr2	175167429	175167654	128.621	-	175167429	175167654	0	1	225	0	15	450	6.18294	1.02692e-39	1.91057e-39	ENSMUST00000109054	Gm14443	UTR3
5951	peak_5951	chr5	129656167	129656942	521.494	-	129656167	129656942	0	1	775	0	134	3822	6.18276	1.40305e-158	1.03403e-157	ENSMUST00000049778	Zfp11	UTR3
11091	peak_11091	chr10	63929921	63930196	39.2285	-	63929921	63930196	0	1	275	0	13	446	6.1823	1.42769e-12	1.55251e-12	ENSMUST00000131945	Lrrtm3	UTR3
7112	peak_7112	chr7	24180955	24181205	142.625	+	24180955	24181205	0	1	250	0	17	625	6.17906	5.90151e-44	1.16301e-43	ENSMUST00000086010	Zfp114	LastExon
2857	peak_2857	chr3	51493490	51494340	874.462	+	51493490	51494340	0	1	850	0	274	7947	6.1783	1.93025e-265	5.76321e-264	ENSMUST00000195715	Rab33b	UTR5
884	peak_884	chr1	131128440	131129265	666.472	-	131128440	131129265	0	1	825	0	223	6829	6.17788	1.88477e-202	2.35514e-201	ENSMUST00000016670	Dyrk3	UTR3
6784	peak_6784	chr6	93677979	93678954	Inf	-	93677979	93678954	0	1	975	0	1831	66013	6.17764	0	0	ENSMUST00000093769	Magi1	UTR3
534	peak_534	chr1	188211102	188211352	105.775	+	188211102	188211352	0	1	250	0	14	455	6.17736	8.68739e-33	1.44063e-32	ENSMUST00000110938	Esrrg	LastExon
17409	peak_17409	chr18	61307280	61307630	74.1571	-	61307280	61307630	0	1	350	0	7	469	6.17671	3.42516e-23	4.74772e-23	ENSMUST00000063307	Ppargc1b	Exon
1880	peak_1880	chr2	164820772	164821147	411.813	+	164820772	164821147	0	1	375	0	65	2366	6.17653	2.13816e-125	1.07607e-124	ENSMUST00000052107	Zswim3	LastExon
7660	peak_7660	chr7	144420684	144421359	685.425	+	144420684	144421359	0	1	675	0	260	11445	6.17629	3.45496e-208	4.6409e-207	ENSMUST00000097929	Shank2	LastExon
17393	peak_17393	chr18	58009847	58010597	808.867	-	58009847	58010597	0	1	750	0	294	8534	6.17622	1.41569e-245	3.21263e-244	ENSMUST00000025497	Fbn2	UTR3
5269	peak_5269	chr5	117414374	117414724	129.199	+	117414374	117414724	0	1	350	0	15	626	6.17533	6.85538e-40	1.27979e-39	ENSMUST00000180430	Ksr2	UTR5
3777	peak_3777	chr4	53761194	53761644	502.657	+	53761194	53761644	0	1	450	0	165	4719	6.1748	7.0532e-153	4.84365e-152	ENSMUST00000107638	Fktn	UTR3
15608	peak_15608	chr16	44220815	44222065	Inf	+	44220815	44222065	0	1	1250	0	392	11488	6.17452	0	0	ENSMUST00000169582	Usf3	LastExon
4093	peak_4093	chr4	134523177	134523727	329.244	+	134523177	134523727	0	1	550	0	94	3237	6.17428	2.02774e-100	7.71943e-100	ENSMUST00000105866	Aunip	LastExon
12283	peak_12283	chr11	62317500	62317850	966.762	-	62317500	62317850	0	1	350	0	373	10801	6.17407	2.01527e-293	9.45754e-292	ENSMUST00000159315	Ncor1	UTR3
12812	peak_12812	chr12	52516151	52516926	Inf	+	52516151	52516926	0	1	775	0	1146	36009	6.17359	0	0	ENSMUST00000110725	Arhgap5	UTR5
9991	peak_9991	chr9	20470498	20471198	Inf	-	20470498	20471198	0	1	700	0	471	13278	6.17346	0	0	ENSMUST00000168095	Zfp426	UTR3
8513	peak_8513	chr8	56591578	56591803	210.221	+	56591578	56591803	0	1	225	0	29	830	6.17305	2.05682e-64	5.21298e-64	ENSMUST00000110322	Fbxo8	UTR3
3680	peak_3680	chr4	24901749	24902074	700.192	+	24901749	24902074	0	1	325	0	183	5337	6.17261	1.16473e-212	1.66411e-211	ENSMUST00000146721	Ndufaf4	UTR5
16212	peak_16212	chr17	34934895	34935870	671.027	+	34934895	34935870	0	1	975	0	136	4604	6.17198	7.8953e-204	1.00203e-202	ENSMUST00000007253	Neu1	UTR3
2793	peak_2793	chr3	26332124	26332349	72.5369	+	26332124	26332349	0	1	225	0	8	243	6.17178	1.0649e-22	1.45959e-22	ENSMUST00000099182	A830092H15Rik	UTR5
17157	peak_17157	chr18	64271756	64272131	403.989	+	64271756	64272131	0	1	375	0	129	3729	6.17156	4.99025e-123	2.4396e-122	ENSMUST00000139622	St8sia3	UTR5
13235	peak_13235	chr12	81314437	81315287	408.885	-	81314437	81315287	0	1	850	0	100	3209	6.17073	1.64619e-124	8.18964e-124	ENSMUST00000183102	Slc8a3	UTR3
7985	peak_7985	chr7	70354220	70354770	1008.23	-	70354220	70354770	0	1	550	0	915	29805	6.17036	5.41629e-306	3.11453e-304	ENSMUST00000089565	Nr2f2	UTR3
12899	peak_12899	chr12	78837549	78837849	501.812	+	78837549	78837849	0	1	300	0	87	2509	6.16959	1.27076e-152	8.69784e-152	ENSMUST00000219197	Mpp5	UTR3
18519	peak_18519	chrX	103481790	103482715	176.794	-	103481790	103482715	0	1	925	0	3605	117085	6.16763	2.69241e-54	6.02189e-54	ENSMUST00000127786	Xist	UTR3
6472	peak_6472	chr6	128473323	128473648	56.5579	+	128473323	128473648	0	1	325	0	6	206	6.16755	7.65576e-18	9.42727e-18	ENSMUST00000144745	Gm10069	UTR5
17231	peak_17231	chr18	86717514	86717764	156.152	+	86717514	86717764	0	1	250	0	20	621	6.1674	4.7443e-48	9.85079e-48	ENSMUST00000169470	Cbln2	UTR3
8237	peak_8237	chr7	127384034	127384409	207.9	-	127384034	127384409	0	1	375	0	27	967	6.16714	1.03659e-63	2.60561e-63	ENSMUST00000164345	9130019O22Rik	UTR3
5782	peak_5782	chr5	106624319	106635409	Inf	-	106624319	106635409	0	2	71579	0,10511	998	27880	6.16671	0	0	ENSMUST00000112698	Zfp644	Exon
17003	peak_17003	chr18	37322605	37322655	24.541	+	37322605	37322655	0	1	50	0	1	90	6.1661	4.06797e-08	4.09655e-08	ENSMUST00000078271	Pcdhb5	LastExon
17847	peak_17847	chr19	59463880	59464480	879.035	+	59463880	59464480	0	1	600	0	3230	98358	6.16585	7.92707e-267	2.42114e-265	ENSMUST00000174573	Emx2	UTR5
5947	peak_5947	chr5	128595252	128595352	25.3857	-	128595252	128595352	0	1	100	0	2	92	6.16561	2.25862e-08	2.28103e-08	ENSMUST00000091324	5930412G12Rik	UTR3
1239	peak_1239	chr2	19658911	19659586	274.012	+	19658911	19659586	0	1	675	0	51	1736	6.16469	1.04006e-83	3.26659e-83	ENSMUST00000052168	Otud1	LastExon
14337	peak_14337	chr14	70978876	70979126	54.2709	+	70978876	70979126	0	1	250	0	5	297	6.16421	3.79728e-17	4.60084e-17	ENSMUST00000022699	Gfra2	UTR3
10657	peak_10657	chr10	68779577	68779702	33.8445	+	68779577	68779702	0	1	125	0	3	112	6.16386	6.16245e-11	6.48329e-11	ENSMUST00000080995	Tmem26	UTR3
12960	peak_12960	chr12	90331655	90332680	459.298	+	90331655	90332680	0	1	1025	0	92	2982	6.16326	9.11837e-140	5.46252e-139	ENSMUST00000167103	Nrxn3	UTR3
4971	peak_4971	chr5	33419415	33419640	112.144	+	33419415	33419640	0	1	225	0	13	445	6.16293	1.01616e-34	1.7428e-34	ENSMUST00000202816	Uvssa	UTR3
6386	peak_6386	chr6	113150954	113151854	Inf	+	113150954	113151854	0	1	900	0	1448	47685	6.16223	0	0	ENSMUST00000150107	Setd5	UTR5
17719	peak_17719	chr19	38782707	38783257	793.596	+	38782707	38783257	0	1	550	0	185	5274	6.16196	6.05119e-241	1.26959e-239	ENSMUST00000169713	Plce1	UTR3
13103	peak_13103	chr12	20899821	20900867	689.007	-	20899821	20900867	0	2	138408	0,638	157	4702	6.16139	2.84118e-209	3.87511e-208	ENSMUST00000079237	Zfp125	UTR3
16457	peak_16457	chr17	22201339	22201689	168.138	-	22201339	22201689	0	1	350	0	20	699	6.16097	1.11733e-51	2.42935e-51	ENSMUST00000179996	Zfp994	LastExon
12838	peak_12838	chr12	61839588	61839988	107.966	+	61839588	61839988	0	1	400	0	109	3270	6.16051	1.87825e-33	3.15458e-33	ENSMUST00000119481	Lrfn5	Exon
3482	peak_3482	chr3	101056580	101060986	870.964	-	101056580	101060986	0	2	75350	0,4056	790	28789	6.15848	2.21964e-264	6.51247e-263	ENSMUST00000102694	Ptgfrn	Exon
10310	peak_10310	chr9	87704999	87705324	288.085	-	87704999	87705324	0	1	325	0	60	1688	6.15838	5.73117e-88	1.89557e-87	ENSMUST00000034991	Tbx18	UTR3
17009	peak_17009	chr18	37344151	37344376	84.3292	+	37344151	37344376	0	1	225	0	10	311	6.1568	2.79277e-26	4.11516e-26	ENSMUST00000053037	Pcdhb7	LastExon
7197	peak_7197	chr7	29830342	29830992	683.612	+	29830342	29830992	0	1	650	0	179	5163	6.15642	1.2243e-207	1.63045e-206	ENSMUST00000032796	Zfp790	UTR3
15564	peak_15564	chr16	35947864	35948239	204.923	+	35947864	35948239	0	1	375	0	32	944	6.15525	8.24986e-63	2.05184e-62	ENSMUST00000114877	Parp9	UTR5
1292	peak_1292	chr2	28036999	28037449	609.026	+	28036999	28037449	0	1	450	0	203	7101	6.15519	4.62296e-185	4.62321e-184	ENSMUST00000028280	Col5a1	LastExon
2041	peak_2041	chr2	25578940	25579290	125.503	-	25578940	25579290	0	1	350	0	17	1266	6.15423	9.04333e-39	1.65849e-38	ENSMUST00000181730	Gm26702	UTR5
13114	peak_13114	chr12	31487103	31488203	Inf	-	31487103	31488203	0	1	1100	0	467	13972	6.15397	0	0	ENSMUST00000101499	Cbll1	UTR3
18512	peak_18512	chrX	102515774	102516049	201.67	-	102515774	102516049	0	1	275	0	27	910	6.15352	7.95648e-62	1.95589e-61	ENSMUST00000113611	Phka1	UTR3
4232	peak_4232	chr4	155957245	155957695	812.791	+	155957245	155957695	0	1	450	0	414	14293	6.15312	9.16786e-247	2.11656e-245	ENSMUST00000124092	Ube2j2	UTR5
806	peak_806	chr1	91416908	91417058	32.3373	-	91416908	91417058	0	1	150	0	3	143	6.1528	1.76649e-10	1.84285e-10	ENSMUST00000069620	Per2	UTR3
9437	peak_9437	chr9	15738246	15738846	876.848	+	15738246	15738846	0	1	600	0	269	7587	6.1528	3.65721e-266	1.10255e-264	ENSMUST00000115588	Slc36a4	UTR3
2255	peak_2255	chr2	79836302	79836602	91.802	-	79836302	79836602	0	1	300	0	11	324	6.15255	1.50509e-28	2.31651e-28	ENSMUST00000183775	Pde1a	UTR3
4364	peak_4364	chr4	53033411	53034061	509.948	-	53033411	53034061	0	1	650	0	159	4490	6.15204	4.37588e-155	3.09283e-154	ENSMUST00000030010	Abca1	UTR3
10274	peak_10274	chr9	72618692	72619520	937.139	-	72618692	72619520	0	2	551,46	0,782	600	17336	6.15189	1.93387e-284	7.81562e-283	ENSMUST00000184373	Gm27232	UTR3
15344	peak_15344	chr15	98288912	98289112	102.403	-	98288912	98289112	0	1	200	0	11	490	6.15175	9.14958e-32	1.49165e-31	ENSMUST00000023722	Zfp641	LastExon
9727	peak_9727	chr9	85844608	85845783	838.646	+	85844608	85845783	0	1	1175	0	619	17653	6.15174	1.37769e-254	3.48745e-253	ENSMUST00000098500	Tpbg	LastExon
10976	peak_10976	chr10	19004869	19005019	35.6401	-	19004869	19005019	0	1	150	0	3	178	6.15138	1.75547e-11	1.86753e-11	ENSMUST00000154590	Tnfaip3	UTR3
560	peak_560	chr1	3206900	3213846	326.335	-	3206900	3213846	0	2	417408	0,6538	58	1690	6.14997	1.54172e-99	5.80046e-99	ENSMUST00000159265	Xkr4	UTR3
11047	peak_11047	chr10	44441763	44441938	35.707	-	44441763	44441938	0	1	175	0	3	184	6.14849	1.67525e-11	1.78291e-11	ENSMUST00000218369	Prdm1	Exon
1234	peak_1234	chr2	16751217	16751967	555.936	+	16751217	16751967	0	1	750	0	131	3660	6.14764	5.32862e-169	4.43203e-168	ENSMUST00000126173	Plxdc2	UTR5
16054	peak_16054	chr17	21560291	21560491	78.3552	+	21560291	21560491	0	1	200	0	9	274	6.14731	1.81756e-24	2.58654e-24	ENSMUST00000079242	Zfp52	LastExon
12071	peak_12071	chr11	121715920	121716095	52.032	+	121715920	121716095	0	1	175	0	5	205	6.14712	1.81817e-16	2.17171e-16	ENSMUST00000036742	Metrnl	LastExon
7519	peak_7519	chr7	119916418	119916593	32.5923	+	119916418	119916593	0	1	175	0	3	102	6.14694	1.47812e-10	1.54435e-10	ENSMUST00000106516	Lyrm1	UTR3
321	peak_321	chr1	127803266	127803891	718.808	+	127803266	127803891	0	1	625	0	571	16078	6.14683	2.67189e-218	4.14142e-217	ENSMUST00000153359	Ccnt2	UTR5
11961	peak_11961	chr11	109490041	109490466	134.641	+	109490041	109490466	0	1	425	0	16	486	6.14672	1.54389e-41	2.94354e-41	ENSMUST00000106697	Arsg	UTR5
1765	peak_1765	chr2	148675411	148676011	723.432	+	148675411	148676011	0	1	600	0	446	12964	6.14659	1.05856e-219	1.67991e-218	ENSMUST00000047177	Nxt1	LastExon
1383	peak_1383	chr2	34775693	34776393	820.855	+	34775693	34776393	0	1	700	0	4242	118981	6.14656	3.33988e-249	7.90666e-248	ENSMUST00000100171	Hspa5	LastExon
10886	peak_10886	chr10	117683438	117684213	163.907	+	117683438	117684213	0	1	775	0	21	688	6.14617	2.13166e-50	4.5618e-50	ENSMUST00000141991	Cpm	UTR5
3335	peak_3335	chr3	63697683	63698408	623.125	-	63697683	63698408	0	1	725	0	192	5542	6.14589	2.49007e-189	2.63444e-188	ENSMUST00000159676	Plch1	UTR3
723	peak_723	chr1	69538488	69539113	308.086	-	69538488	69539113	0	1	625	0	58	1657	6.14404	5.08581e-94	1.80621e-93	ENSMUST00000187184	Ikzf2	UTR3
6852	peak_6852	chr6	118428843	118430343	749.91	-	118428843	118430343	0	1	1500	0	263	7381	6.14258	1.02562e-227	1.79759e-226	ENSMUST00000161519	Zfp248	UTR3
11418	peak_11418	chr11	16953276	16954400	365.532	+	16953276	16954400	0	2	405245	0,879	93	2719	6.14243	2.13495e-111	9.20321e-111	ENSMUST00000061327	Fbxo48	UTR5
11260	peak_11260	chr10	89412997	89414422	867.706	-	89412997	89414422	0	1	1425	0	558	15952	6.14222	2.15655e-263	6.22925e-262	ENSMUST00000105298	Gas2l3	UTR3
5079	peak_5079	chr5	74198640	74198965	563.34	+	74198640	74198965	0	1	325	0	131	4201	6.14147	3.07469e-171	2.61693e-170	ENSMUST00000051937	Rasl11b	UTR3
3379	peak_3379	chr3	86546405	86546605	64.9374	-	86546405	86546605	0	1	200	0	7	215	6.1405	2.1684e-20	2.83068e-20	ENSMUST00000191695	Mab21l2	UTR3
5680	peak_5680	chr5	45734014	45734464	609.525	-	45734014	45734464	0	1	450	0	152	4367	6.14009	3.266e-185	3.27144e-184	ENSMUST00000016026	Lcorl	LastExon
6376	peak_6376	chr6	107530225	107569672	549.407	+	107530225	107569672	0	2	182682	0,36765	2613	73791	6.13951	5.03837e-167	4.09197e-166	ENSMUST00000049285	Lrrn1	UTR5
7803	peak_7803	chr7	27984855	27985080	213.828	-	27984855	27985080	0	1	225	0	34	969	6.13819	1.66378e-65	4.27911e-65	ENSMUST00000099111	Zfp850	UTR3
11669	peak_11669	chr11	70940462	70940962	896.79	+	70940462	70940962	0	1	500	0	514	14203	6.13765	3.30286e-272	1.09494e-270	ENSMUST00000100928	Rabep1	UTR3
13420	peak_13420	chr13	21444109	21445912	802.561	+	21444109	21445912	0	2	84991	0,812	438	12070	6.13715	1.15105e-243	2.54089e-242	ENSMUST00000110485	Zscan26	UTR3
5676	peak_5676	chr5	44176138	44177138	835.955	-	44176138	44177138	0	1	1000	0	368	10513	6.13568	8.97863e-254	2.25142e-252	ENSMUST00000198388	Tapt1	UTR3
3646	peak_3646	chr4	8864291	8866898	910.992	+	8864291	8866898	0	2	141161	0,1446	2081	80243	6.13566	1.63092e-276	5.80988e-275	ENSMUST00000170391	Chd7	LastExon
447	peak_447	chr1	167001766	167079674	Inf	+	167001766	167079674	0	2	621138	0,76770	470	17922	6.13466	0	0	ENSMUST00000126198	Fam78b	LastExon
9985	peak_9985	chr9	20347235	20348185	666.72	-	20347235	20348185	0	1	950	0	150	4113	6.1345	1.58308e-202	1.98214e-201	ENSMUST00000068079	Zfp560	UTR3
1941	peak_1941	chr2	179894085	179896416	727.881	+	179894085	179896416	0	3	107,38,705	0,570,1626	296	11170	6.13357	4.7642e-221	7.69167e-220	ENSMUST00000129659	Cdh4	UTR5
3143	peak_3143	chr3	125404343	125404493	44.4738	+	125404343	125404493	0	1	150	0	5	159	6.13341	3.61759e-14	4.093e-14	ENSMUST00000147016	Ndst4	UTR5
9622	peak_9622	chr9	58006282	58006482	39.107	+	58006282	58006482	0	1	200	0	4	145	6.13335	1.55448e-12	1.68892e-12	ENSMUST00000181289	Gm17322	UTR5
10360	peak_10360	chr9	101922227	101923527	766.375	-	101922227	101923527	0	1	1300	0	686	19268	6.133	1.0591e-232	1.98712e-231	ENSMUST00000085169	Ephb1	UTR3
9570	peak_9570	chr9	50843078	50843542	431.059	+	50843078	50843542	0	1	464	0	65	1878	6.13229	3.18443e-131	1.73123e-130	ENSMUST00000175728	Alg9	UTR3
2259	peak_2259	chr2	84441905	84442180	89.5263	-	84441905	84442180	0	1	275	0	10	321	6.1319	7.37916e-28	1.12175e-27	ENSMUST00000111717	Tfpi	UTR3
781	peak_781	chr1	84036795	84038120	840.794	-	84036795	84038120	0	1	1325	0	226	6289	6.13188	3.04861e-255	7.86686e-254	ENSMUST00000176559	Pid1	UTR3
7838	peak_7838	chr7	30055413	30055563	49.2597	-	30055413	30055563	0	1	150	0	5	166	6.13132	1.2664e-15	1.48374e-15	ENSMUST00000183025	Zfp82	UTR3
12969	peak_12969	chr12	95779244	95781219	944.222	+	95779244	95781219	0	1	1975	0	1282	36618	6.13045	1.37124e-286	5.76696e-285	ENSMUST00000110117	Flrt2	LastExon
15120	peak_15120	chr15	73205104	73205804	781.26	-	73205104	73205804	0	1	700	0	260	7287	6.13039	3.2808e-237	6.56548e-236	ENSMUST00000110036	Ptk2	UTR3
8498	peak_8498	chr8	45045118	45051705	781.512	+	45045118	45051705	0	2	50925	0,5662	1126	39437	6.13027	2.75287e-237	5.51491e-236	ENSMUST00000215588	Fat1	LastExon
6484	peak_6484	chr6	134984152	134984452	126.723	+	134984152	134984452	0	1	300	0	18	720	6.12961	3.86589e-39	7.12206e-39	ENSMUST00000167323	Apold1	LastExon
16800	peak_16800	chr17	78852563	78852763	59.3268	-	78852563	78852763	0	1	200	0	6	181	6.12944	1.10102e-18	1.38313e-18	ENSMUST00000024884	Eif2ak2	UTR3
12156	peak_12156	chr11	22836218	22837018	398.551	-	22836218	22837018	0	1	800	0	64	1964	6.1292	2.20303e-121	1.05758e-120	ENSMUST00000160826	Gm28048	UTR3
12540	peak_12540	chr11	100741367	100741492	34.5894	-	100741367	100741492	0	1	125	0	3	153	6.12749	3.65835e-11	3.86848e-11	ENSMUST00000107363	Kcnh4	UTR3
18013	peak_18013	chr19	41084055	41084155	32.9457	-	41084055	41084155	0	1	100	0	3	115	6.1269	1.15478e-10	1.20882e-10	ENSMUST00000169941	Tll2	UTR3
1221	peak_1221	chr2	10251304	10251779	384.218	+	10251304	10251779	0	1	475	0	62	1899	6.1269	4.76977e-117	2.18236e-116	ENSMUST00000026886	Itih5	LastExon
6116	peak_6116	chr6	4758750	4759075	562.66	+	4758750	4759075	0	1	325	0	127	3716	6.12669	4.93843e-171	4.1917e-170	ENSMUST00000176551	Peg10	UTR3
20	peak_20	chr1	15710665	15711890	687.037	+	15710665	15711890	0	1	1225	0	226	6953	6.12653	1.12177e-208	1.51777e-207	ENSMUST00000170146	Kcnb2	LastExon
9691	peak_9691	chr9	72618710	72620085	Inf	+	72618710	72620085	0	1	1375	0	1514	41035	6.12621	0	0	ENSMUST00000093820	Rfx7	LastExon
4208	peak_4208	chr4	154273961	154274336	314.034	+	154273961	154274336	0	1	375	0	48	2213	6.12557	8.07647e-96	2.92635e-95	ENSMUST00000030897	Megf6	UTR3
8362	peak_8362	chr8	4523737	4524262	652.257	+	4523737	4524262	0	1	525	0	135	4808	6.12556	3.78063e-198	4.47787e-197	ENSMUST00000175781	Cers4	UTR5
18073	peak_18073	chr19	57036907	57037282	444.534	-	57036907	57037282	0	1	375	0	110	3384	6.12515	2.67575e-135	1.5208e-134	ENSMUST00000111555	Ablim1	UTR3
1573	peak_1573	chr2	109723890	109724165	76.8962	+	109723890	109724165	0	1	275	0	9	274	6.12501	5.04026e-24	7.11133e-24	ENSMUST00000111042	Bdnf	LastExon
13127	peak_13127	chr12	40035812	40037316	Inf	-	40035812	40037316	0	2	1021,54	0,1450	621	17032	6.12472	0	0	ENSMUST00000101472	Arl4a	UTR3
4767	peak_4767	chr4	148616906	148617556	1015.7	-	148616906	148617556	0	1	650	0	3409	93007	6.12446	2.89935e-308	1.74815e-306	ENSMUST00000186711	Tardbp	UTR3
2659	peak_2659	chr2	167050405	167055538	476.305	-	167050405	167055538	0	2	40385	0,4748	82	2663	6.12433	6.6109e-145	4.14985e-144	ENSMUST00000135967	Znfx1	UTR3
11304	peak_11304	chr10	115372115	115372890	972.663	-	115372115	115372890	0	1	775	0	318	8918	6.12387	3.21109e-295	1.58269e-293	ENSMUST00000020346	Thap2	UTR3
15944	peak_15944	chr16	91615606	91616331	381.933	-	91615606	91616331	0	1	725	0	91	2568	6.12371	2.34343e-116	1.06359e-115	ENSMUST00000169982	Dnajc28	UTR3
18010	peak_18010	chr19	40550256	40550706	935.574	-	40550256	40550706	0	1	450	0	353	9711	6.12313	5.78446e-284	2.31267e-282	ENSMUST00000025979	Aldh18a1	UTR3
18245	peak_18245	chrX	100816541	100816991	Inf	+	100816541	100816991	0	1	450	0	380	10626	6.1231	0	0	ENSMUST00000113735	Dlg3	UTR3
5636	peak_5636	chr5	36456028	36456153	25.3063	-	36456028	36456153	0	1	125	0	2	80	6.123	2.38728e-08	2.41018e-08	ENSMUST00000044964	2210406O10Rik	UTR3
16569	peak_16569	chr17	31845797	31846597	780.28	-	31845797	31846597	0	1	800	0	305	14499	6.12295	6.48406e-237	1.2948e-235	ENSMUST00000024839	Sik1	UTR3
11248	peak_11248	chr10	85892769	85893319	940.099	-	85892769	85893319	0	1	550	0	430	12128	6.1228	2.43135e-285	1.0044e-283	ENSMUST00000037646	Prdm4	UTR3
11606	peak_11606	chr11	60952222	60952472	245.446	+	60952222	60952472	0	1	250	0	48	1490	6.12267	4.55056e-75	1.29814e-74	ENSMUST00000130269	Map2k3	UTR3
6836	peak_6836	chr6	116021367	116021892	694.367	-	116021367	116021892	0	1	525	0	157	4478	6.12235	6.77904e-211	9.43243e-210	ENSMUST00000173110	Tmcc1	UTR3
8401	peak_8401	chr8	14846806	14846856	34.1259	+	14846806	14846856	0	1	50	0	3	115	6.12207	5.06133e-11	5.33418e-11	ENSMUST00000043279	Dlgap2	UTR3
313	peak_313	chr1	118608651	118609351	1015.87	+	118608651	118609351	0	1	700	0	1119	34863	6.12145	2.58216e-308	1.56196e-306	ENSMUST00000204325	Clasp1	UTR3
10276	peak_10276	chr9	73013654	73014004	338.341	-	73013654	73014004	0	1	350	0	52	1498	6.12117	3.58296e-103	1.4104e-102	ENSMUST00000184035	Pigb	UTR3
15701	peak_15701	chr16	3964128	3964228	32.1108	-	3964128	3964228	0	1	100	0	3	116	6.11978	2.06958e-10	2.15614e-10	ENSMUST00000163478	Nlrc3	UTR3
15111	peak_15111	chr15	68178900	68180023	290.375	-	68178900	68180023	0	2	43307	0,816	55	2138	6.11919	1.16234e-88	3.87745e-88	ENSMUST00000160248	Zfat	Exon
11721	peak_11721	chr11	76212662	76213362	560.778	+	76212662	76213362	0	1	700	0	225	7568	6.11902	1.83129e-170	1.54523e-169	ENSMUST00000169701	Glod4	UTR3
8985	peak_8985	chr8	20399198	20399448	365.462	-	20399198	20399448	0	1	250	0	62	1750	6.11836	2.24141e-111	9.65988e-111	ENSMUST00000139264	2610005L07Rik	UTR3
18479	peak_18479	chrX	86747144	86747244	47.9233	-	86747144	86747244	0	1	100	0	5	154	6.11823	3.23138e-15	3.74659e-15	ENSMUST00000113966	Il1rapl1	UTR3
2794	peak_2794	chr3	27241399	27241549	34.369	+	27241399	27241549	0	1	150	0	3	132	6.11727	4.26712e-11	4.5071e-11	ENSMUST00000046515	Nceh1	LastExon
8174	peak_8174	chr7	119857412	119857937	735.892	-	119857412	119857937	0	1	525	0	282	7754	6.1172	1.78941e-223	2.98198e-222	ENSMUST00000106519	Dcun1d3	UTR3
536	peak_536	chr1	188212177	188212277	54.5197	+	188212177	188212277	0	1	100	0	6	218	6.1172	3.18793e-17	3.87212e-17	ENSMUST00000110938	Esrrg	UTR3
9497	peak_9497	chr9	30962350	30962475	46.0279	+	30962350	30962475	0	1	125	0	5	151	6.11698	1.21945e-14	1.39384e-14	ENSMUST00000163037	Adamts8	UTR3
3564	peak_3564	chr3	123113973	123114398	329.312	-	123113973	123114398	0	1	425	0	53	1931	6.11655	1.93411e-100	7.36597e-100	ENSMUST00000198584	Synpo2	LastExon
4308	peak_4308	chr4	41497153	41497653	276.485	-	41497153	41497653	0	1	500	0	44	1765	6.11615	1.85647e-84	5.88529e-84	ENSMUST00000054920	AI464131	UTR3
16649	peak_16649	chr17	35956818	35957118	791.134	-	35956818	35957118	0	1	300	0	321	11661	6.11536	3.37551e-240	6.99546e-239	ENSMUST00000043757	Abcf1	UTR3
13562	peak_13562	chr13	58409102	58409527	286.008	+	58409102	58409527	0	1	425	0	48	1569	6.11521	2.43811e-87	8.00008e-87	ENSMUST00000224479	Rmi1	LastExon
1700	peak_1700	chr2	129017270	129017595	180.434	+	129017270	129017595	0	1	325	0	33	917	6.11439	2.13055e-55	4.83074e-55	ENSMUST00000110320	Zc3h6	LastExon
417	peak_417	chr1	158688534	158689034	855.628	+	158688534	158689034	0	1	500	0	622	17733	6.11418	9.8008e-260	2.6932e-258	ENSMUST00000046110	Astn1	LastExon
2923	peak_2923	chr3	84903578	84925553	936.198	+	84903578	84925553	0	2	501,74	0,21901	804	23247	6.11387	3.72986e-284	1.50089e-282	ENSMUST00000151410	Fbxw7	UTR5
7428	peak_7428	chr7	97347847	97348422	288.444	+	97347847	97348422	0	1	575	0	44	1423	6.11378	4.46188e-88	1.47785e-87	ENSMUST00000054107	Kctd21	LastExon
6973	peak_6973	chr6	143832899	143833449	183.843	-	143832899	143833449	0	1	550	0	2142	63554	6.11311	1.98021e-56	4.54744e-56	ENSMUST00000077160	Sox5	UTR3
2199	peak_2199	chr2	58446879	58447654	812.013	-	58446879	58447654	0	1	775	0	344	9875	6.11301	1.5732e-246	3.62752e-245	ENSMUST00000056376	Acvr1	UTR3
11108	peak_11108	chr10	70924881	70925231	165.907	-	70924881	70925231	0	1	350	0	25	697	6.1125	5.29078e-51	1.14009e-50	ENSMUST00000143791	Bicc1	UTR3
3206	peak_3206	chr3	146001677	146002202	403.174	+	146001677	146002202	0	1	525	0	86	2945	6.11238	8.79132e-123	4.29109e-122	ENSMUST00000200546	Syde2	Exon
844	peak_844	chr1	118834156	118835131	879.363	-	118834156	118835131	0	1	975	0	289	8394	6.11236	6.30547e-267	1.92902e-265	ENSMUST00000062483	Gli2	UTR3
146	peak_146	chr1	59981681	59982431	891.745	+	59981681	59982431	0	1	750	0	448	12176	6.11235	1.11361e-270	3.61458e-269	ENSMUST00000036540	Fam117b	LastExon
17687	peak_17687	chr19	28964919	28965269	218.949	+	28964919	28965269	0	1	350	0	41	1163	6.1122	4.6962e-67	1.2299e-66	ENSMUST00000045674	Plpp6	UTR3
16007	peak_16007	chr17	7933346	7933521	40.6744	+	7933346	7933521	0	1	175	0	4	131	6.1119	5.18688e-13	5.69893e-13	ENSMUST00000036370	Tagap	LastExon
8179	peak_8179	chr7	121649095	121649570	702.556	-	121649095	121649570	0	1	475	0	235	8005	6.11173	2.2395e-213	3.23193e-212	ENSMUST00000046929	Usp31	LastExon
3416	peak_3416	chr3	89271857	89272207	210.737	-	89271857	89272207	0	1	350	0	27	996	6.11156	1.43565e-64	3.64509e-64	ENSMUST00000118860	Efna1	UTR3
6115	peak_6115	chr6	4756700	4758575	Inf	+	4756700	4758575	0	1	1875	0	899	24664	6.11147	0	0	ENSMUST00000176204	Peg10	UTR3
1255	peak_1255	chr2	24971648	24972148	507.05	+	24971648	24972148	0	1	500	0	106	2914	6.11112	3.2953e-154	2.30461e-153	ENSMUST00000126909	Dph7	UTR3
1847	peak_1847	chr2	156576785	156577110	107.12	+	156576785	156577110	0	1	325	0	12	617	6.11066	3.39357e-33	5.6725e-33	ENSMUST00000144818	Gm14168	UTR5
14411	peak_14411	chr14	6869222	6869397	66.9035	-	6869222	6869397	0	1	175	0	8	229	6.10972	5.47411e-21	7.24501e-21	ENSMUST00000171906	Gm3667	UTR3
2489	peak_2489	chr2	137082880	137083380	885.497	-	137082880	137083380	0	1	500	0	271	8593	6.10959	8.75573e-269	2.74626e-267	ENSMUST00000133640	Jag1	UTR3
4848	peak_4848	chr5	3845197	3845422	79.6197	+	3845197	3845422	0	1	225	0	9	337	6.10895	7.51716e-25	1.07666e-24	ENSMUST00000044039	Lrrd1	UTR5
7958	peak_7958	chr7	64337549	64345957	482.52	-	64337549	64345957	0	2	384291	0,8117	102	4059	6.10887	8.68765e-147	5.58329e-146	ENSMUST00000173374	Gm20457	UTR3
16987	peak_16987	chr18	37144820	37156169	959.431	+	37144820	37156169	0	2	1710,15	0,11334	300	10095	6.10759	3.35063e-291	1.52258e-289	ENSMUST00000047479	Pcdhac2	Exon
4315	peak_4315	chr4	42025953	42026028	25.2712	-	42025953	42026028	0	1	75	0	2	79	6.10702	2.44652e-08	2.46945e-08	ENSMUST00000117125	Gm13303	UTR3
14761	peak_14761	chr15	33213071	33213171	24.9647	+	33213071	33213171	0	1	100	0	2	74	6.1066	3.02949e-08	3.05408e-08	ENSMUST00000226896	Cpq	UTR5
6571	peak_6571	chr6	28417790	28419090	Inf	-	28417790	28419090	0	1	1300	0	458	20240	6.10513	0	0	ENSMUST00000064377	Gcc1	UTR3
16287	peak_16287	chr17	46891395	46891995	551.296	+	46891395	46891995	0	1	600	0	203	6511	6.10494	1.35193e-167	1.10521e-166	ENSMUST00000040434	Tbcc	LastExon
16455	peak_16455	chr17	22198989	22199189	98.2064	-	22198989	22199189	0	1	200	0	12	376	6.10337	1.71459e-30	2.73474e-30	ENSMUST00000179996	Zfp994	UTR3
18166	peak_18166	chrX	56362761	56363286	318.173	+	56362761	56363286	0	1	525	0	59	1615	6.10323	4.52127e-97	1.6608e-96	ENSMUST00000101560	Zfp449	LastExon
2569	peak_2569	chr2	155941422	155941772	73.2521	-	155941422	155941772	0	1	350	0	8	327	6.10322	6.45418e-23	8.89012e-23	ENSMUST00000040162	Gdf5	UTR3
7248	peak_7248	chr7	43589379	43589704	545.706	+	43589379	43589704	0	1	325	0	113	3033	6.10296	6.64336e-166	5.32125e-165	ENSMUST00000205769	Zfp719	LastExon
5005	peak_5005	chr5	35279490	35279715	36.3422	+	35279490	35279715	0	1	225	0	3	402	6.10261	1.07406e-11	1.14787e-11	ENSMUST00000049545	Adra2c	UTR5
18105	peak_18105	chrX	6633868	6634218	332.019	+	6633868	6634218	0	1	350	0	57	1687	6.10241	2.93695e-101	1.12821e-100	ENSMUST00000089520	Shroom4	UTR3
9753	peak_9753	chr9	99583463	99584263	761.785	+	99583463	99584263	0	1	800	0	275	7449	6.10192	2.61666e-231	4.78421e-230	ENSMUST00000066650	Dbr1	LastExon
2216	peak_2216	chr2	65097736	65098161	276.338	-	65097736	65098161	0	1	425	0	50	1744	6.10154	2.05727e-84	6.51633e-84	ENSMUST00000112430	Cobll1	Exon
3897	peak_3897	chr4	106653463	106654738	672.954	+	106653463	106654738	0	1	1275	0	173	6949	6.10153	2.05508e-204	2.63511e-203	ENSMUST00000058905	Pars2	LastExon
4457	peak_4457	chr4	106442878	106443003	67.8061	-	106442878	106443003	0	1	125	0	9	277	6.10032	2.91129e-21	3.87541e-21	ENSMUST00000049507	Pcsk9	UTR3
677	peak_677	chr1	56795785	56796635	118.757	-	56795785	56796635	0	1	850	0	351	10164	6.09976	1.00442e-36	1.78052e-36	ENSMUST00000177424	Satb2	UTR3
13891	peak_13891	chr13	67443019	67443194	78.6865	-	67443019	67443194	0	1	175	0	9	264	6.09927	1.44152e-24	2.05596e-24	ENSMUST00000180580	Zfp874a	UTR3
2430	peak_2430	chr2	125831828	125832328	965.069	-	125831828	125832328	0	1	500	0	647	17291	6.09921	6.59677e-293	3.05732e-291	ENSMUST00000028635	Cops2	UTR3
2700	peak_2700	chr2	169885988	169886738	406.359	-	169885988	169886738	0	1	750	0	75	2605	6.09889	9.5799e-124	4.71803e-123	ENSMUST00000180945	Gm26883	UTR3
11704	peak_11704	chr11	75405001	75405326	180.747	+	75405001	75405326	0	1	325	0	30	850	6.09822	1.71295e-55	3.88721e-55	ENSMUST00000044530	Smyd4	UTR3
2750	peak_2750	chr2	181253398	181254123	931.028	-	181253398	181254123	0	1	725	0	436	19184	6.09794	1.3834e-282	5.40338e-281	ENSMUST00000049032	Gmeb2	UTR3
1903	peak_1903	chr2	167690039	167690414	209.065	+	167690039	167690414	0	1	375	0	32	985	6.09707	4.60229e-64	1.1617e-63	ENSMUST00000070642	Cebpb	UTR3
9714	peak_9714	chr9	76134101	76134476	113.644	+	76134101	76134476	0	1	375	0	14	387	6.09691	3.56514e-35	6.16047e-35	ENSMUST00000183425	Hmgcll1	UTR3
13911	peak_13911	chr13	67620525	67620850	318.399	-	67620525	67620850	0	1	325	0	52	1461	6.09686	3.86184e-97	1.42025e-96	ENSMUST00000012314	Zfp729a	LastExon
9639	peak_9639	chr9	59924657	59925382	756.677	+	59924657	59925382	0	1	725	0	409	11360	6.09671	9.16942e-230	1.65058e-228	ENSMUST00000128341	Myo9a	LastExon
1064	peak_1064	chr1	166098377	166098702	97.0446	-	166098377	166098702	0	1	325	0	12	412	6.09624	3.86332e-30	6.11898e-30	ENSMUST00000085992	Dusp27	UTR3
16596	peak_16596	chr17	32883277	32883902	563.266	-	32883277	32883902	0	1	625	0	149	4033	6.09598	3.23743e-171	2.75418e-170	ENSMUST00000178401	Zfp870	LastExon
17267	peak_17267	chr18	16589926	16590276	656.23	-	16589926	16590276	0	1	350	0	305	9267	6.09573	2.37297e-199	2.85232e-198	ENSMUST00000115850	Cdh2	UTR3
10280	peak_10280	chr9	73932261	73932311	25.2445	-	73932261	73932311	0	1	50	0	2	75	6.09572	2.49255e-08	2.51564e-08	ENSMUST00000075245	Unc13c	Exon
16666	peak_16666	chr17	44099257	44099557	146.496	-	44099257	44099557	0	1	300	0	21	565	6.09491	3.97511e-45	7.94979e-45	ENSMUST00000143137	Enpp4	UTR3
9423	peak_9423	chr9	4330161	4330411	74.882	+	4330161	4330411	0	1	250	0	8	237	6.09471	2.06217e-23	2.87254e-23	ENSMUST00000212221	Kbtbd3	LastExon
17537	peak_17537	chr19	5070302	5070637	501.342	+	5070302	5070637	0	1	335	0	108	5003	6.09463	1.76577e-152	1.20505e-151	ENSMUST00000070630	Cd248	LastExon
6213	peak_6213	chr6	47905147	47905922	Inf	+	47905147	47905922	0	1	775	0	714	34575	6.09447	0	0	ENSMUST00000061890	Zfp282	LastExon
13102	peak_13102	chr12	20876763	20876963	118.11	-	20876763	20876963	0	1	200	0	16	521	6.09416	1.57884e-36	2.78739e-36	ENSMUST00000127917	3110053B16Rik	UTR3
16069	peak_16069	chr17	22374907	22375357	371.501	+	22374907	22375357	0	1	450	0	65	2220	6.0939	3.34521e-113	1.46957e-112	ENSMUST00000121315	Zfp758	LastExon
18356	peak_18356	chrX	164423150	164423350	112.061	+	164423150	164423350	0	1	200	0	13	368	6.09296	1.07711e-34	1.84665e-34	ENSMUST00000112255	Piga	Exon
10982	peak_10982	chr10	24641663	24641838	90.6424	-	24641663	24641838	0	1	175	0	11	308	6.0929	3.38497e-28	5.17524e-28	ENSMUST00000039882	Enpp1	UTR3
15993	peak_15993	chr17	6039310	6044290	375.392	+	6039310	6044290	0	2	80337	0,4643	73	1963	6.09191	2.22539e-114	9.90238e-114	ENSMUST00000024570	Serac1	UTR3
14776	peak_14776	chr15	41103093	41103843	489.925	+	41103093	41103843	0	1	750	0	140	3864	6.09172	4.99067e-149	3.29487e-148	ENSMUST00000230319	Zfpm2	LastExon
15393	peak_15393	chr16	3749419	3750094	893.495	+	3749419	3750094	0	1	675	0	346	9241	6.09114	3.28721e-271	1.07446e-269	ENSMUST00000161630	Zfp263	UTR3
8473	peak_8473	chr8	35385643	35385943	83.7437	+	35385643	35385943	0	1	300	0	10	292	6.09108	4.20623e-26	6.17495e-26	ENSMUST00000211648	Ppp1r3b	UTR3
13441	peak_13441	chr13	30245843	30246143	95.2426	+	30245843	30246143	0	1	300	0	12	350	6.09066	1.3623e-29	2.13358e-29	ENSMUST00000047311	Mboat1	UTR3
14258	peak_14258	chr14	57542569	57542894	70.5663	+	57542569	57542894	0	1	325	0	58	2013	6.09024	4.22132e-22	5.72023e-22	ENSMUST00000089494	Il17d	LastExon
2250	peak_2250	chr2	75980330	75981055	337.903	-	75980330	75981055	0	1	725	0	71	1973	6.08936	4.86377e-103	1.91054e-102	ENSMUST00000099994	Ttc30a1	LastExon
13882	peak_13882	chr13	67317097	67317497	265.571	-	67317097	67317497	0	1	400	0	37	1041	6.08839	3.71568e-81	1.13505e-80	ENSMUST00000168892	Zfp595	LastExon
6231	peak_6231	chr6	48631883	48632008	34.9127	+	48631883	48632008	0	1	125	0	3	155	6.08771	2.91942e-11	3.09184e-11	ENSMUST00000154570	AI854703	UTR3
3513	peak_3513	chr3	107741947	107742947	415.609	-	107741947	107742947	0	1	1000	0	90	3829	6.08703	1.51686e-126	7.74902e-126	ENSMUST00000014743	Csf1	UTR3
9669	peak_9669	chr9	65452699	65452974	106.19	+	65452699	65452974	0	1	275	0	12	358	6.08656	6.50026e-33	1.08073e-32	ENSMUST00000074792	Mtfmt	UTR3
15733	peak_15733	chr16	10422406	10422881	805.525	-	10422406	10422881	0	1	475	0	312	9844	6.08585	1.45146e-244	3.25809e-243	ENSMUST00000051118	Tvp23a	UTR3
15830	peak_15830	chr16	35697486	35697936	852.309	-	35697486	35697936	0	1	450	0	426	12543	6.08576	9.98643e-259	2.68869e-257	ENSMUST00000149892	Dirc2	UTR3
2356	peak_2356	chr2	115863288	115864488	Inf	-	115863288	115864488	0	1	1200	0	4148	110476	6.08552	0	0	ENSMUST00000074285	Meis2	UTR3
1201	peak_1201	chr2	3779605	3780105	901.085	+	3779605	3780105	0	1	500	0	528	14047	6.0853	1.64048e-273	5.57734e-272	ENSMUST00000177125	Fam107b	UTR3
1702	peak_1702	chr2	129093013	129093813	Inf	+	129093013	129093813	0	1	800	0	606	25210	6.08519	0	0	ENSMUST00000035812	Ttl	LastExon
15911	peak_15911	chr16	75757514	75758339	Inf	-	75757514	75758339	0	1	825	0	465	12364	6.08517	0	0	ENSMUST00000114244	Hspa13	UTR3
6382	peak_6382	chr6	111358883	111495680	64.5047	+	111358883	111495680	0	2	197,28	0,136769	7	206	6.08502	2.93535e-20	3.8209e-20	ENSMUST00000174018	Grm7	UTR3
2523	peak_2523	chr2	151591623	151592023	161.659	-	151591623	151592023	0	1	400	0	20	869	6.08494	1.0222e-49	2.16712e-49	ENSMUST00000109877	Snph	UTR3
17648	peak_17648	chr19	16010320	16010870	211.025	+	16010320	16010870	0	1	550	0	29	787	6.08392	1.17498e-64	2.9857e-64	ENSMUST00000181731	C130060C02Rik	UTR5
9404	peak_9404	chr8	124910245	124910720	966.271	-	124910245	124910720	0	1	475	0	527	14382	6.08305	2.84652e-293	1.32916e-291	ENSMUST00000034469	Egln1	UTR3
6678	peak_6678	chr6	67035295	67035595	523.322	-	67035295	67035595	0	1	300	0	116	3204	6.08235	3.92162e-159	2.91322e-158	ENSMUST00000043098	Gadd45a	UTR3
1380	peak_1380	chr2	33646039	33646089	25.3192	+	33646039	33646089	0	1	50	0	2	72	6.0812	2.36581e-08	2.38876e-08	ENSMUST00000147294	C130021I20Rik	UTR5
8062	peak_8062	chr7	98051084	98051409	250.269	-	98051084	98051409	0	1	325	0	35	1044	6.08104	1.58113e-76	4.58562e-76	ENSMUST00000156992	Myo7a	UTR3
9295	peak_9295	chr8	111450158	111450908	451.166	-	111450158	111450908	0	1	750	0	94	2923	6.08086	2.63276e-137	1.53237e-136	ENSMUST00000211981	Wdr59	UTR3
4155	peak_4155	chr4	147868978	147869578	621.545	+	147868978	147869578	0	1	600	0	203	5926	6.0808	7.48992e-189	7.87499e-188	ENSMUST00000094481	Fv1	LastExon
4589	peak_4589	chr4	127311495	127312195	334.037	-	127311495	127312195	0	1	700	0	51	2374	6.08055	7.18915e-102	2.78464e-101	ENSMUST00000053753	Gja4	UTR3
7316	peak_7316	chr7	63542928	63543128	67.1197	+	63542928	63543128	0	1	200	0	8	272	6.0804	4.70481e-21	6.23659e-21	ENSMUST00000121016	Gm5898	UTR5
4437	peak_4437	chr4	87227283	87227783	356.346	-	87227283	87227783	0	1	500	0	61	1760	6.08015	1.28187e-108	5.36085e-108	ENSMUST00000155361	Slc24a2	UTR3
2604	peak_2604	chr2	160770635	160771560	832.955	-	160770635	160771560	0	1	925	0	342	9476	6.08007	7.28156e-253	1.80163e-251	ENSMUST00000109460	Zhx3	UTR3
5015	peak_5015	chr5	36486462	36486687	72.2957	+	36486462	36486687	0	1	225	0	8	229	6.07971	1.2596e-22	1.72518e-22	ENSMUST00000060100	Ccdc96	UTR3
1745	peak_1745	chr2	137067670	137068645	751.871	+	137067670	137068645	0	1	975	0	265	7206	6.0791	2.61568e-228	4.61485e-227	ENSMUST00000130856	Slx4ip	UTR5
10567	peak_10567	chr10	34298945	34299445	754.383	+	34298945	34299445	0	1	500	0	243	6581	6.07908	4.54763e-229	8.09235e-228	ENSMUST00000047935	Tspyl4	UTR3
4256	peak_4256	chr4	11960733	11962133	949.474	-	11960733	11962133	0	1	1400	0	746	20118	6.07874	3.46843e-288	1.51336e-286	ENSMUST00000108299	Pdp1	LastExon
17545	peak_17545	chr19	5569894	5570169	135.839	+	5569894	5570169	0	1	275	0	16	892	6.07751	6.69684e-42	1.28389e-41	ENSMUST00000096318	Ap5b1	LastExon
9634	peak_9634	chr9	59315729	59316199	657.966	+	59315729	59316199	0	1	470	0	235	6214	6.07689	7.06889e-200	8.56311e-199	ENSMUST00000026266	Adpgk	UTR3
7829	peak_7829	chr7	29893332	29894257	765.636	-	29893332	29894257	0	1	925	0	205	5391	6.07669	1.77777e-232	3.31549e-231	ENSMUST00000159920	Zfp27	UTR3
2113	peak_2113	chr2	30284253	30284903	601.262	-	30284253	30284903	0	1	650	0	114	3295	6.07615	1.03587e-182	1.00517e-181	ENSMUST00000100219	Dolk	UTR3
977	peak_977	chr1	152518733	152521331	828.417	-	152518733	152521331	0	2	463,37	0,2561	334	9514	6.07612	1.7199e-251	4.18322e-250	ENSMUST00000111857	Rgl1	UTR3
12554	peak_12554	chr11	101973242	101973692	412.797	-	101973242	101973692	0	1	450	0	72	2232	6.07601	1.07695e-125	5.44053e-125	ENSMUST00000107172	Dusp3	UTR3
5521	peak_5521	chr5	149429897	149429947	24.5094	+	149429897	149429947	0	1	50	0	2	80	6.07572	4.15877e-08	4.18731e-08	ENSMUST00000201641	Gm20488	UTR5
6577	peak_6577	chr6	28830671	28831171	537.075	-	28830671	28831171	0	1	500	0	154	5691	6.07436	2.72304e-163	2.10948e-162	ENSMUST00000062304	Lrrc4	LastExon
714	peak_714	chr1	64734709	64734959	45.1532	-	64734709	64734959	0	1	250	0	4	319	6.07393	2.24972e-14	2.55592e-14	ENSMUST00000116133	Fzd5	UTR3
8506	peak_8506	chr8	46534627	46534827	97.1329	+	46534627	46534827	0	1	200	0	11	343	6.07352	3.63249e-30	5.75532e-30	ENSMUST00000110372	Acsl1	UTR3
18178	peak_18178	chrX	66655388	66656463	931.17	+	66655388	66656463	0	1	1075	0	342	9225	6.07294	1.25092e-282	4.89621e-281	ENSMUST00000036043	Slitrk2	LastExon
17822	peak_17822	chr19	53813871	53813946	25.2398	+	53813871	53813946	0	1	75	0	2	114	6.07269	2.50078e-08	2.52381e-08	ENSMUST00000164202	Rbm20	Exon
9490	peak_9490	chr9	28922865	28922940	31.4958	+	28922865	28922940	0	1	75	0	3	99	6.07209	3.17914e-10	3.30233e-10	ENSMUST00000115243	Opcml	UTR3
11311	peak_11311	chr10	117073353	117074753	Inf	-	117073353	117074753	0	1	1400	0	910	26902	6.07169	0	0	ENSMUST00000020381	Frs2	UTR3
2617	peak_2617	chr2	160949002	160950152	Inf	-	160949002	160950152	0	1	1150	0	778	24854	6.07168	0	0	ENSMUST00000039782	Chd6	UTR3
3801	peak_3801	chr4	58957486	58957786	81.9387	+	58957486	58957786	0	1	300	0	11	316	6.07167	1.48538e-25	2.15765e-25	ENSMUST00000107554	Zkscan16	LastExon
8312	peak_8312	chr7	140812594	140812769	45.9191	-	140812594	140812769	0	1	175	0	5	155	6.07064	1.3161e-14	1.50302e-14	ENSMUST00000106052	Zfp941	LastExon
14047	peak_14047	chr13	104217174	104220356	523.554	-	104217174	104220356	0	2	105320	0,2862	241	6454	6.07061	3.33557e-159	2.47985e-158	ENSMUST00000225798	Ppwd1	UTR3
4147	peak_4147	chr4	146467442	146467767	181.194	+	146467442	146467767	0	1	325	0	26	982	6.06887	1.25522e-55	2.85264e-55	ENSMUST00000105733	Zfp992	LastExon
5473	peak_5473	chr5	143246263	143246838	874.083	+	143246263	143246838	0	1	575	0	240	6399	6.06829	2.52184e-265	7.49353e-264	ENSMUST00000075916	Zfp12	UTR3
7231	peak_7231	chr7	39536126	39536176	33.3892	+	39536126	39536176	0	1	50	0	3	97	6.06777	8.47162e-11	8.88909e-11	ENSMUST00000108015	Zfp619	LastExon
5710	peak_5710	chr5	71571733	71571983	114.22	-	71571733	71571983	0	1	250	0	16	457	6.06696	2.38564e-35	4.13421e-35	ENSMUST00000197994	Gabra4	UTR3
43	peak_43	chr1	34180163	34181199	308.852	+	34180163	34181199	0	2	335,65	0,971	62	2089	6.06627	2.98265e-94	1.06252e-93	ENSMUST00000189952	Dst	UTR5
14143	peak_14143	chr14	28522700	28523100	521.977	+	28522700	28523100	0	1	400	0	125	3514	6.06589	1.00218e-158	7.4006e-158	ENSMUST00000134163	Wnt5a	UTR5
9195	peak_9195	chr8	85110571	85110821	182.467	-	85110571	85110821	0	1	250	0	26	724	6.06581	5.16731e-56	1.18053e-55	ENSMUST00000098550	Zfp791	LastExon
3337	peak_3337	chr3	63698708	63699383	401.744	-	63698708	63699383	0	1	675	0	161	4620	6.0657	2.38388e-122	1.15632e-121	ENSMUST00000159676	Plch1	UTR3
11299	peak_11299	chr10	110944106	110944381	864.408	-	110944106	110944381	0	1	275	0	279	7361	6.06565	2.15061e-262	6.12661e-261	ENSMUST00000220247	Zdhhc17	UTR3
18485	peak_18485	chrX	94078655	94079905	980.235	-	94078655	94079905	0	1	1250	0	599	15870	6.06556	1.63399e-297	8.3177e-296	ENSMUST00000113927	Zfx	UTR3
1578	peak_1578	chr2	112412666	112412991	639.596	+	112412666	112412991	0	1	325	0	120	4302	6.06542	2.5737e-194	2.90082e-193	ENSMUST00000028552	Katnbl1	UTR3
15922	peak_15922	chr16	85795226	85795851	531.117	-	85795226	85795851	0	1	625	0	212	6056	6.0647	1.72723e-161	1.31133e-160	ENSMUST00000023610	Adamts1	UTR3
15528	peak_15528	chr16	32298547	32299397	839.123	+	32298547	32299397	0	1	850	0	582	15300	6.06409	9.81421e-255	2.50478e-253	ENSMUST00000171474	Rnf168	LastExon
15312	peak_15312	chr15	93244466	93245116	792.052	-	93244466	93245116	0	1	650	0	395	10390	6.06407	1.77923e-240	3.70379e-239	ENSMUST00000057896	Gxylt1	UTR3
2265	peak_2265	chr2	84710739	84713569	835.853	-	84710739	84713569	0	2	733,67	0,2763	335	8783	6.06398	9.65182e-254	2.41698e-252	ENSMUST00000035840	Zdhhc5	UTR5
3100	peak_3100	chr3	105668288	105669690	538.343	+	105668288	105669690	0	2	39686	0,716	179	6542	6.06388	1.12296e-163	8.76492e-163	ENSMUST00000118360	Kcnd3	LastExon
17027	peak_17027	chr18	37450031	37450256	84.4982	+	37450031	37450256	0	1	225	0	10	287	6.06368	2.48027e-26	3.66019e-26	ENSMUST00000052387	Pcdhb14	LastExon
5008	peak_5008	chr5	35281315	35281615	99.6303	+	35281315	35281615	0	1	300	0	13	627	6.06338	6.34183e-31	1.01928e-30	ENSMUST00000049545	Adra2c	UTR3
9236	peak_9236	chr8	99146085	99146260	60.0728	-	99146085	99146260	0	1	175	0	7	205	6.06318	6.53079e-19	8.24693e-19	ENSMUST00000137501	Gm15681	UTR3
13556	peak_13556	chr13	55725725	55726221	765.284	+	55725725	55726221	0	1	496	0	372	9739	6.06283	2.2734e-232	4.23133e-231	ENSMUST00000021959	Txndc15	LastExon
16479	peak_16479	chr17	24178955	24179330	547.636	-	24178955	24179330	0	1	375	0	147	3891	6.06283	1.72911e-166	1.39641e-165	ENSMUST00000201359	Tbc1d24	UTR3
4261	peak_4261	chr4	21678054	21678254	57.4435	-	21678054	21678254	0	1	200	0	6	244	6.06244	4.1189e-18	5.10234e-18	ENSMUST00000095141	Prdm13	UTR3
11335	peak_11335	chr10	121412224	121412824	492.338	-	121412224	121412824	0	1	600	0	112	3417	6.06189	9.28443e-150	6.18663e-149	ENSMUST00000026902	Rassf3	UTR3
5898	peak_5898	chr5	122871367	122871842	968.279	-	122871367	122871842	0	1	475	0	423	11076	6.06145	6.95276e-294	3.30451e-292	ENSMUST00000127403	Kdm2b	UTR3
14342	peak_14342	chr14	73239390	73239790	531.683	+	73239390	73239790	0	1	400	0	122	3333	6.06135	1.16401e-161	8.85894e-161	ENSMUST00000170967	Rb1	UTR3
9632	peak_9632	chr9	58860732	58860955	141.72	+	58860732	58860955	0	1	223	0	20	534	6.06113	1.10979e-43	2.17853e-43	ENSMUST00000034889	Hcn4	LastExon
5200	peak_5200	chr5	110252866	110253291	757.226	+	110252866	110253291	0	1	425	0	418	12182	6.0604	6.26069e-230	1.12807e-228	ENSMUST00000031474	Ankle2	Exon
11992	peak_11992	chr11	115488998	115489848	390.294	+	115488998	115489848	0	1	850	0	66	2497	6.06012	6.93479e-119	3.23491e-118	ENSMUST00000035240	Armc7	LastExon
4378	peak_4378	chr4	58436829	58437479	797.56	-	58436829	58437479	0	1	650	0	367	9647	6.05993	3.80865e-242	8.13749e-241	ENSMUST00000107570	Lpar1	UTR3
11094	peak_11094	chr10	66913263	66913488	86.2797	-	66913263	66913488	0	1	225	0	10	301	6.05984	7.13656e-27	1.06471e-26	ENSMUST00000181710	1110002J07Rik	UTR3
17229	peak_17229	chr18	86498728	86499028	58.0001	+	86498728	86499028	0	1	300	0	24	853	6.05865	2.79076e-18	3.46931e-18	ENSMUST00000058829	Neto1	Exon
7379	peak_7379	chr7	80238849	80239499	293.926	+	80238849	80239499	0	1	650	0	44	1803	6.05794	9.77705e-90	3.30832e-89	ENSMUST00000062915	Gdpgp1	LastExon
4212	peak_4212	chr4	154642357	154642732	401.943	+	154642357	154642732	0	1	375	0	76	2513	6.05794	2.07547e-122	1.00751e-121	ENSMUST00000136217	Gm13111	UTR5
3760	peak_3760	chr4	45373954	45374554	532.76	+	45373954	45374554	0	1	600	0	129	3466	6.05782	5.50685e-162	4.19968e-161	ENSMUST00000107798	Dcaf10	UTR5
726	peak_726	chr1	72160657	72160707	24.8213	-	72160657	72160707	0	1	50	0	2	74	6.05763	3.34726e-08	3.37315e-08	ENSMUST00000048860	Mreg	UTR3
6201	peak_6201	chr6	43273742	43273967	33.1358	+	43273742	43273967	0	1	225	0	8	305	6.0576	1.0114e-10	1.05957e-10	ENSMUST00000031750	Arhgef5	Exon
2482	peak_2482	chr2	132381280	132381655	113.512	-	132381280	132381655	0	1	375	0	15	548	6.05701	3.91039e-35	6.75391e-35	ENSMUST00000110156	Prokr2	Exon
12800	peak_12800	chr12	36317501	36317551	30.9076	+	36317501	36317551	0	1	50	0	3	99	6.05652	4.7949e-10	4.96464e-10	ENSMUST00000041407	Sostdc1	UTR3
822	peak_822	chr1	97645452	97646252	819.488	-	97645452	97646252	0	1	800	0	418	12366	6.05631	8.65946e-249	2.03963e-247	ENSMUST00000149927	D1Ertd622e	UTR3
6065	peak_6065	chr5	143172210	143173035	622.422	-	143172210	143173035	0	1	825	0	148	3867	6.05588	4.06779e-189	4.28902e-188	ENSMUST00000166382	Rbak	UTR3
8457	peak_8457	chr8	31236176	31236526	375.473	+	31236176	31236526	0	1	350	0	117	4475	6.05558	2.10303e-114	9.36236e-114	ENSMUST00000161788	Fut10	LastExon
6640	peak_6640	chr6	48024237	48024762	556.266	-	48024237	48024762	0	1	525	0	118	6450	6.05538	4.23585e-169	3.52628e-168	ENSMUST00000095944	Zfp777	UTR3
16354	peak_16354	chr17	69387644	69389019	Inf	+	69387644	69389019	0	1	1375	0	997	30767	6.05536	0	0	ENSMUST00000112676	Zbtb14	LastExon
12355	peak_12355	chr11	72452587	72452962	303.285	-	72452587	72452962	0	1	375	0	50	2024	6.05496	1.44358e-92	5.03563e-92	ENSMUST00000144940	Spns2	UTR3
14762	peak_14762	chr15	34140740	34141190	913.538	+	34140740	34141190	0	1	450	0	497	14851	6.05365	2.75004e-277	9.94873e-276	ENSMUST00000163333	Mtdh	UTR3
6112	peak_6112	chr6	4642119	4642469	598.198	+	4642119	4642469	0	1	350	0	130	3401	6.05265	8.73387e-182	8.40499e-181	ENSMUST00000015333	Casd1	UTR3
12298	peak_12298	chr11	65689617	65690742	Inf	-	65689617	65690742	0	1	1125	0	688	18074	6.05232	0	0	ENSMUST00000046963	Map2k4	UTR3
13529	peak_13529	chr13	52647205	52647480	72.7075	+	52647205	52647480	0	1	275	0	8	244	6.05118	9.44981e-23	1.29675e-22	ENSMUST00000055087	Syk	UTR3
7867	peak_7867	chr7	35049896	35050771	Inf	-	35049896	35050771	0	1	875	0	1282	34925	6.05083	0	0	ENSMUST00000070191	Cebpg	UTR3
736	peak_736	chr1	72859331	72860581	711.496	-	72859331	72860581	0	1	1250	0	1359	44121	6.05066	4.38629e-216	6.5798e-215	ENSMUST00000027377	Igfbp5	UTR3
8955	peak_8955	chr8	9207400	9232951	282.192	-	9207400	9232951	0	2	632,18	0,25533	49	1956	6.04963	3.48462e-86	1.12692e-85	ENSMUST00000208933	Fam155a	UTR3
3873	peak_3873	chr4	100440903	100441153	101.375	+	100440903	100441153	0	1	250	0	13	399	6.0496	1.87633e-31	3.0422e-31	ENSMUST00000039630	Ror1	LastExon
14836	peak_14836	chr15	76891123	76891898	726.401	+	76891123	76891898	0	1	775	0	347	10028	6.04859	1.33464e-220	2.14545e-219	ENSMUST00000230954	Zfp7	UTR5
12261	peak_12261	chr11	59792182	59792557	335.967	-	59792182	59792557	0	1	375	0	83	2545	6.04843	1.87404e-102	7.30905e-102	ENSMUST00000091246	Flcn	UTR3
241	peak_241	chr1	87719680	87719730	31.6364	+	87719680	87719730	0	1	50	0	3	95	6.0483	2.88237e-10	2.99573e-10	ENSMUST00000167032	Inpp5d	UTR3
12437	peak_12437	chr11	83440842	83441367	295.596	-	83440842	83441367	0	1	525	0	45	1779	6.04803	3.06038e-90	1.03915e-89	ENSMUST00000103209	Mmp28	UTR3
15699	peak_15699	chr16	3865591	3866666	668.529	-	3865591	3866666	0	1	1075	0	214	5549	6.04802	4.49426e-203	5.65761e-202	ENSMUST00000119599	Zfp597	UTR3
15368	peak_15368	chr15	99470083	99471008	809.049	-	99470083	99471008	0	1	925	0	265	9419	6.04769	1.2463e-245	2.83168e-244	ENSMUST00000229827	Bcdin3d	UTR3
9441	peak_9441	chr9	20593308	20595008	Inf	+	20593308	20595008	0	1	1700	0	732	18999	6.04757	0	0	ENSMUST00000140668	Zfp846	UTR3
9290	peak_9290	chr8	111007612	111008162	467.999	-	111007612	111008162	0	1	550	0	119	3372	6.04738	2.13764e-142	1.31267e-141	ENSMUST00000065784	Ddx19b	UTR3
7840	peak_7840	chr7	30077336	30077686	400.393	-	30077336	30077686	0	1	350	0	71	1899	6.04732	6.10776e-122	2.94955e-121	ENSMUST00000088785	Zfp566	UTR3
5254	peak_5254	chr5	115342931	115343381	643.98	+	115342931	115343381	0	1	450	0	174	5225	6.04706	1.21111e-195	1.38857e-194	ENSMUST00000031508	Triap1	UTR3
9363	peak_9363	chr8	122629988	122630263	431.373	-	122629988	122630263	0	1	275	0	87	2369	6.04688	2.55972e-131	1.39241e-130	ENSMUST00000064674	Cbfa2t3	UTR3
9006	peak_9006	chr8	25944458	25944933	275.661	-	25944458	25944933	0	1	475	0	46	1218	6.04609	3.29809e-84	1.042e-83	ENSMUST00000037609	Hgsnat	UTR3
17055	peak_17055	chr18	37514001	37514176	96.8389	+	37514001	37514176	0	1	175	0	12	332	6.0456	4.4604e-30	7.05627e-30	ENSMUST00000061405	Pcdhb21	LastExon
16176	peak_16176	chr17	32285086	32285536	369.382	+	32285086	32285536	0	1	450	0	88	2263	6.04555	1.46252e-112	6.38131e-112	ENSMUST00000181112	Gm26549	UTR5
18471	peak_18471	chrX	74370307	74370682	161.175	-	74370307	74370682	0	1	375	0	21	666	6.04491	1.4331e-49	3.03065e-49	ENSMUST00000037967	Slc10a3	LastExon
3372	peak_3372	chr3	83836547	83836772	41.4174	-	83836547	83836772	0	1	225	0	4	151	6.04393	3.07869e-13	3.40511e-13	ENSMUST00000029623	Tlr2	LastExon
3195	peak_3195	chr3	138902991	138903241	707.71	+	138902991	138903241	0	1	250	0	194	5026	6.04378	6.11009e-215	9.07792e-214	ENSMUST00000119993	Tspan5	UTR3
15960	peak_15960	chr16	95360243	95361093	388.211	-	95360243	95361093	0	1	850	0	75	2265	6.04369	2.95925e-118	1.37081e-117	ENSMUST00000171646	Erg	UTR3
12965	peak_12965	chr12	91539310	91539585	100.356	+	91539310	91539585	0	1	275	0	13	358	6.04323	3.82133e-31	6.16355e-31	ENSMUST00000186437	Tshr	UTR3
6679	peak_6679	chr6	71391483	71391933	800.569	-	71391483	71391933	0	1	450	0	259	6650	6.0421	4.64507e-243	1.01101e-241	ENSMUST00000140696	Rmnd5a	UTR3
14063	peak_14063	chr13	112523259	112523309	24.5284	-	112523259	112523309	0	1	50	0	2	76	6.04207	4.1039e-08	4.13251e-08	ENSMUST00000051756	Il31ra	UTR3
7893	peak_7893	chr7	42609650	42610325	487.437	-	42609650	42610325	0	1	675	0	119	3109	6.04128	2.82405e-148	1.84873e-147	ENSMUST00000107994	Zfp976	UTR3
[truncated: 16,632 more rows]

## Sheet: VIRMA cKO-17658 peaks
Peak_ID	name	chr	chromStart	chromEnd	score	strand	thickStart	thickEnd	itemRgb	blockCount	blockSizes	blockStarts	ReadsCount.input	ReadsCount.IP	log2FoldChange	pvalue	padj	OverlapGene	Symbol	Priority
8502	peak_8502	chr8	45397892	45398342	58.8387	-	45397892	45398342	0	1	450	0	0	394	11.2105	1.15531e-18	1.93995e-18	ENSMUST00000210013	Tlr3	LastExon
15161	peak_15161	chr16	92695834	92696159	57.2387	-	92695834	92696159	0	1	325	0	0	345	10.867	3.58057e-18	5.88092e-18	ENSMUST00000189126	Runx1	UTR3
3193	peak_3193	chr3	96284083	96284308	57.2423	-	96284083	96284308	0	1	225	0	0	486	10.7347	3.57091e-18	5.86615e-18	ENSMUST00000029748	Fcgr1	UTR3
4034	peak_4034	chr4	43505802	43506002	52.3613	-	43505802	43506002	0	1	200	0	0	287	10.5619	1.12581e-16	1.7285e-16	ENSMUST00000139119	Gm12454	UTR3
10154	peak_10154	chr10	81334708	81334958	54.1768	+	81334708	81334958	0	1	250	0	0	608	10.4278	3.11841e-17	4.91081e-17	ENSMUST00000220312	Tbxa2r	UTR3
10227	peak_10227	chr10	102389037	102389262	50.6626	+	102389037	102389262	0	1	225	0	0	209	10.2589	3.75557e-16	5.61095e-16	ENSMUST00000120748	Mgat4c	LastExon
17426	peak_17426	chrX	18418712	18419012	47.9972	-	18418712	18419012	0	1	300	0	0	211	10.2486	2.47502e-15	3.55953e-15	ENSMUST00000044188	4930578C19Rik	UTR3
12914	peak_12914	chr13	102705385	102705710	50.681	+	102705385	102705710	0	1	325	0	0	231	10.2199	3.7059e-16	5.54002e-16	ENSMUST00000022124	Cd180	LastExon
76	peak_76	chr1	40365196	40365396	47.6122	+	40365196	40365396	0	1	200	0	0	267	10.2086	3.25145e-15	4.64844e-15	ENSMUST00000194296	Il1rl2	LastExon
978	peak_978	chr1	175963705	175963880	47.7869	-	175963705	175963880	0	1	175	0	0	200	10.1811	2.87233e-15	4.11819e-15	ENSMUST00000111167	Pld5	UTR3
973	peak_973	chr1	174836009	174836209	47.0899	-	174836009	174836209	0	1	200	0	0	192	10.0206	4.70367e-15	6.67611e-15	ENSMUST00000055294	Grem2	UTR3
13010	peak_13010	chr13	38022171	38022371	44.9511	-	38022171	38022371	0	1	200	0	0	193	9.99935	2.13908e-14	2.94014e-14	ENSMUST00000089840	Cage1	UTR3
12646	peak_12646	chr13	8767602	8767952	44.0641	+	8767602	8767952	0	1	350	0	0	202	9.98662	4.0175e-14	5.43734e-14	ENSMUST00000135574	Adarb2	UTR3
1081	peak_1081	chr2	11300200	11300450	47.1728	+	11300200	11300450	0	1	250	0	0	198	9.96838	4.43502e-15	6.30341e-15	ENSMUST00000028118	Prkcq	UTR3
4216	peak_4216	chr4	119177531	119177731	40.755	-	119177531	119177731	0	1	200	0	0	204	9.75681	4.19223e-13	5.38923e-13	ENSMUST00000127574	Ermap	UTR3
17628	peak_17628	chrX	155573779	155573954	39.7401	-	155573779	155573954	0	1	175	0	0	156	9.7518	8.5854e-13	1.08901e-12	ENSMUST00000170236	Ptchd1	UTR3
8595	peak_8595	chr8	71692068	71692343	45.3499	-	71692068	71692343	0	1	275	0	0	206	9.7414	1.61361e-14	2.23003e-14	ENSMUST00000034260	B3gnt3	UTR3
7482	peak_7482	chr7	45131187	45131362	42.8692	-	45131187	45131362	0	1	175	0	0	181	9.71847	9.35512e-14	1.24476e-13	ENSMUST00000146760	Flt3l	UTR3
16232	peak_16232	chr18	52639175	52639375	43.8433	+	52639175	52639375	0	1	200	0	0	180	9.70069	4.69361e-14	6.33637e-14	ENSMUST00000209270	Zfp474	LastExon
4693	peak_4693	chr5	63808619	63808819	43.0715	+	63808619	63808819	0	1	200	0	0	154	9.66747	8.1033e-14	1.08187e-13	ENSMUST00000159584	Nwd2	UTR3
6412	peak_6412	chr6	116694679	116694954	41.0314	-	116694679	116694954	0	1	275	0	0	168	9.65168	3.44297e-13	4.44968e-13	ENSMUST00000056623	Tmem72	UTR3
13533	peak_13533	chr14	70978901	70979126	44.5349	+	70978901	70979126	0	1	225	0	0	319	9.6403	2.87455e-14	3.92324e-14	ENSMUST00000022699	Gfra2	UTR3
8999	peak_8999	chr9	55004512	55004762	42.6946	+	55004512	55004762	0	1	250	0	0	175	9.63638	1.05925e-13	1.40485e-13	ENSMUST00000213960	Chrna5	Exon
933	peak_933	chr1	163702856	163703031	43.4931	-	163702856	163703031	0	1	175	0	0	172	9.62825	6.0149e-14	8.07751e-14	ENSMUST00000159679	Mettl11b	UTR3
16404	peak_16404	chr18	31946496	31946696	38.2024	-	31946496	31946696	0	1	200	0	0	157	9.61092	2.55349e-12	3.16174e-12	ENSMUST00000064016	Gpr17	UTR3
309	peak_309	chr1	134748470	134748620	39.5406	+	134748470	134748620	0	1	150	0	0	168	9.60226	9.90099e-13	1.25049e-12	ENSMUST00000121990	Syt2	UTR3
1398	peak_1398	chr2	109724040	109724165	39.5965	+	109724040	109724165	0	1	125	0	0	136	9.54687	9.51596e-13	1.20298e-12	ENSMUST00000111042	Bdnf	LastExon
17650	peak_17650	chrX	167305503	167305678	41.3865	-	167305503	167305678	0	1	175	0	0	140	9.51737	2.67623e-13	3.47886e-13	ENSMUST00000112164	Tlr7	LastExon
6512	peak_6512	chr6	134610234	134610359	39.8408	-	134610234	134610359	0	1	125	0	0	196	9.51337	7.9993e-13	1.01561e-12	ENSMUST00000047443	Mansc1	LastExon
3951	peak_3951	chr4	3870656	3870806	40.5364	-	3870656	3870806	0	1	150	0	0	156	9.4874	4.8929e-13	6.27079e-13	ENSMUST00000105158	Mos	UTR3
957	peak_957	chr1	170960632	170960807	41.2539	-	170960632	170960807	0	1	175	0	0	130	9.4771	2.94042e-13	3.81358e-13	ENSMUST00000081103	Fcgr2b	UTR3
16257	peak_16257	chr18	60245700	60245875	39.0363	+	60245700	60245875	0	1	175	0	0	144	9.47198	1.41448e-12	1.77379e-12	ENSMUST00000031549	Gm4951	LastExon
5387	peak_5387	chr5	105117710	105117885	39.4781	-	105117710	105117885	0	1	175	0	0	134	9.46717	1.03479e-12	1.30591e-12	ENSMUST00000100962	Gbp4	UTR3
11752	peak_11752	chr11	83002732	83002907	38.1615	-	83002732	83002907	0	1	175	0	0	125	9.40222	2.63022e-12	3.25264e-12	ENSMUST00000092838	Slfn8	UTR3
5973	peak_5973	chr6	100707031	100707256	39.4995	+	100707031	100707256	0	1	225	0	0	150	9.39989	1.01935e-12	1.2867e-12	ENSMUST00000141333	Gxylt2	UTR5
929	peak_929	chr1	162840318	162840443	38.3553	-	162840318	162840443	0	1	125	0	0	132	9.37642	2.29162e-12	2.84387e-12	ENSMUST00000111518	Fmo1	UTR3
11518	peak_11518	chr11	49019848	49019898	38.4357	-	49019848	49019898	0	1	50	0	0	121	9.36388	2.16529e-12	2.68975e-12	ENSMUST00000101295	9930111J21Rik2	LastExon
2473	peak_2473	chr2	176915361	176915536	38.581	-	176915361	176915536	0	1	175	0	0	124	9.36152	1.95317e-12	2.43206e-12	ENSMUST00000099007	Gm14296	UTR3
13121	peak_13121	chr13	67363608	67363733	39.2709	-	67363608	67363733	0	1	125	0	0	120	9.35035	1.19834e-12	1.50757e-12	ENSMUST00000057070	Zfp456	UTR3
1648	peak_1648	chr2	156576510	156576735	40.058	+	156576510	156576735	0	1	225	0	0	187	9.29441	6.85871e-13	8.73628e-13	ENSMUST00000144818	Gm14168	UTR5
7498	peak_7498	chr7	45832182	45832382	40.0621	-	45832182	45832382	0	1	200	0	0	200	9.261	6.83861e-13	8.71193e-13	ENSMUST00000211713	Grin2d	UTR3
6268	peak_6268	chr6	59353110	59353285	34.6005	-	59353110	59353285	0	1	175	0	0	149	9.23502	3.27265e-11	3.839e-11	ENSMUST00000051065	Gprin3	LastExon
2897	peak_2897	chr3	130595425	130595625	38.1927	+	130595425	130595625	0	1	200	0	0	123	9.21518	2.57189e-12	3.18319e-12	ENSMUST00000183368	Col25a1	UTR3
6598	peak_6598	chr7	12929583	12929758	36.9452	+	12929583	12929758	0	1	175	0	0	130	9.1992	6.21816e-12	7.55784e-12	ENSMUST00000045870	Rnf225	UTR3
4738	peak_4738	chr5	77095456	77095506	37.7335	+	77095456	77095506	0	1	50	0	0	110	9.19853	3.56025e-12	4.37609e-12	ENSMUST00000148568	Hopxos	UTR5
13904	peak_13904	chr14	110751877	110752027	34.9641	-	110751877	110752027	0	1	150	0	0	112	9.17228	2.52896e-11	2.98366e-11	ENSMUST00000078386	Slitrk6	LastExon
11754	peak_11754	chr11	83028479	83028654	37.2209	-	83028479	83028654	0	1	175	0	0	107	9.14496	5.11811e-12	6.24313e-12	ENSMUST00000100716	Slfn10-ps	UTR3
16808	peak_16808	chr19	34588311	34588511	35.8453	+	34588311	34588511	0	1	200	0	0	130	9.12831	1.35636e-11	1.61992e-11	ENSMUST00000102825	Ifit3	UTR3
7686	peak_7686	chr7	106510041	106510216	36.412	-	106510041	106510216	0	1	175	0	0	106	9.09747	9.07938e-12	1.09369e-11	ENSMUST00000184842	Gm8995	UTR3
11513	peak_11513	chr11	48888696	48888871	37.1844	-	48888696	48888871	0	1	175	0	0	125	9.09137	5.25097e-12	6.40298e-12	ENSMUST00000109209	Gm5431	LastExon
2882	peak_2882	chr3	126438684	126438859	35.2819	+	126438684	126438859	0	1	175	0	0	124	9.08974	2.01952e-11	2.39381e-11	ENSMUST00000093976	Arsj	LastExon
5151	peak_5151	chr5	150989202	150989377	37.6701	+	150989202	150989377	0	1	175	0	0	131	9.08631	3.72488e-12	4.57271e-12	ENSMUST00000078856	Kl	Exon
9304	peak_9304	chr9	121909755	121909980	38.931	+	121909755	121909980	0	1	225	0	0	204	9.06832	1.5243e-12	1.90813e-12	ENSMUST00000050327	Ackr2	UTR3
13952	peak_13952	chr15	23474239	23474414	35.562	+	23474239	23474414	0	1	175	0	0	143	9.04604	1.65669e-11	1.97142e-11	ENSMUST00000164787	Cdh18	LastExon
10339	peak_10339	chr10	14404884	14405059	36.5482	-	14404884	14405059	0	1	175	0	0	107	9.03709	8.2444e-12	9.95144e-12	ENSMUST00000041168	Adgrg6	UTR3
1319	peak_1319	chr2	82257384	82257434	33.7235	+	82257384	82257434	0	1	50	0	0	103	9.03101	6.0934e-11	7.05047e-11	ENSMUST00000047527	Zfp804a	LastExon
17593	peak_17593	chrX	141722369	141722544	34.8897	-	141722369	141722544	0	1	175	0	0	135	9.02903	2.66568e-11	3.14159e-11	ENSMUST00000067841	Irs4	Exon
4107	peak_4107	chr4	65381277	65381352	33.7178	-	65381277	65381352	0	1	75	0	0	115	9.0236	6.1181e-11	7.07812e-11	ENSMUST00000084496	Astn2	UTR3
9249	peak_9249	chr9	110899582	110899757	38.0188	+	110899582	110899757	0	1	175	0	0	192	9.01927	2.91013e-12	3.59099e-12	ENSMUST00000155014	Als2cl	UTR3
10938	peak_10938	chr11	62266008	62266133	35.9623	+	62266008	62266133	0	1	125	0	0	100	9.00444	1.24819e-11	1.49376e-11	ENSMUST00000018644	Adora2b	UTR3
7954	peak_7954	chr8	24060843	24061018	35.9823	+	24060843	24061018	0	1	175	0	0	133	9.00117	1.23047e-11	1.47316e-11	ENSMUST00000207301	Zmat4	UTR3
6994	peak_6994	chr7	98182515	98182665	36.3185	+	98182515	98182665	0	1	150	0	0	109	8.99282	9.69752e-12	1.16695e-11	NA	NA	NA
4843	peak_4843	chr5	110620760	110620960	37.4484	+	110620760	110620960	0	1	200	0	0	177	8.98143	4.35821e-12	5.3324e-12	ENSMUST00000165856	Galnt9	UTR3
16408	peak_16408	chr18	34209424	34209624	35.2511	-	34209424	34209624	0	1	200	0	0	112	8.96968	2.06418e-11	2.44545e-11	ENSMUST00000097631	Gm10548	UTR3
6965	peak_6965	chr7	90382818	90382868	35.5002	+	90382818	90382868	0	1	50	0	0	99	8.94083	1.73071e-11	2.0577e-11	ENSMUST00000098310	Sytl2	UTR5
16299	peak_16299	chr18	68338824	68338999	35.8876	+	68338824	68338999	0	1	175	0	0	127	8.93934	1.31659e-11	1.57307e-11	ENSMUST00000172148	Mc5r	LastExon
10244	peak_10244	chr10	112272241	112272366	35.9573	+	112272241	112272366	0	1	125	0	0	213	8.92984	1.25258e-11	1.49892e-11	ENSMUST00000092175	Kcnc2	Exon
6737	peak_6737	chr7	28447991	28448166	35.0529	+	28447991	28448166	0	1	175	0	0	97	8.92737	2.37494e-11	2.80551e-11	ENSMUST00000138741	Gmfg	UTR5
14230	peak_14230	chr15	11036816	11037066	35.2568	-	11036816	11037066	0	1	250	0	0	217	8.91162	2.05596e-11	2.43587e-11	ENSMUST00000058007	Rxfp3	LastExon
17651	peak_17651	chrX	167474058	167474558	52.1461	-	167474058	167474558	0	1	500	0	1	436	8.90427	1.31192e-16	2.00657e-16	ENSMUST00000112145	Frmpd4	UTR3
16421	peak_16421	chr18	35734277	35734377	32.3284	-	35734277	35734377	0	1	100	0	0	114	8.90208	1.63797e-10	1.8543e-10	ENSMUST00000235496	Tmem173	UTR3
9135	peak_9135	chr9	86756758	86756833	34.8966	+	86756758	86756833	0	1	75	0	0	95	8.89946	2.65256e-11	3.12655e-11	ENSMUST00000179574	Prss35	UTR3
6621	peak_6621	chr7	16910346	16910446	34.7556	+	16910346	16910446	0	1	100	0	0	96	8.88703	2.93196e-11	3.44759e-11	ENSMUST00000144408	Ptgir	UTR3
175	peak_175	chr1	78417913	78418013	32.8893	+	78417913	78418013	0	1	100	0	0	107	8.88267	1.10001e-10	1.25697e-10	ENSMUST00000036172	Sgpp2	UTR3
1225	peak_1225	chr2	33643839	33644039	36.2404	+	33643839	33644039	0	1	200	0	0	152	8.87809	1.02491e-11	1.23182e-11	ENSMUST00000147294	C130021I20Rik	UTR5
10313	peak_10313	chr10	7444997	7445147	33.9659	-	7444997	7445147	0	1	150	0	0	106	8.87325	5.12859e-11	5.95989e-11	ENSMUST00000177585	Ulbp1	UTR3
13224	peak_13224	chr13	95512756	95512831	22.1703	-	95512756	95512831	0	1	75	0	0	117	8.85942	2.08998e-07	2.11865e-07	ENSMUST00000022185	F2rl1	UTR3
11934	peak_11934	chr11	107876704	107876879	35.3415	-	107876704	107876879	0	1	175	0	0	115	8.83682	1.93681e-11	2.29686e-11	ENSMUST00000039071	Cacng5	UTR3
9968	peak_9968	chr10	42957855	42958005	34.3609	+	42957855	42958005	0	1	150	0	0	114	8.81388	3.87861e-11	4.53266e-11	ENSMUST00000105494	Scml4	UTR3
12163	peak_12163	chr12	74295636	74295761	33.0163	+	74295636	74295761	0	1	125	0	0	98	8.81194	1.00512e-10	1.15108e-10	ENSMUST00000185822	1700086L19Rik	UTR5
708	peak_708	chr1	89928386	89928536	32.5471	-	89928386	89928536	0	1	150	0	0	99	8.78972	1.40252e-10	1.59347e-10	ENSMUST00000187633	Gbx2	UTR3
369	peak_369	chr1	160078322	160078422	34.2466	+	160078322	160078422	0	1	100	0	0	97	8.78629	4.20519e-11	4.90619e-11	ENSMUST00000163892	4930523C07Rik	UTR3
11753	peak_11753	chr11	83017411	83017511	32.9986	-	83017411	83017511	0	1	100	0	0	94	8.76972	1.01771e-10	1.16527e-10	ENSMUST00000130822	Slfn8	Exon
15357	peak_15357	chr17	29894767	29894842	32.7164	+	29894767	29894842	0	1	75	0	0	126	8.75556	1.24314e-10	1.41704e-10	ENSMUST00000149552	Gm16758	UTR5
4229	peak_4229	chr4	119531332	119531507	33.2756	-	119531332	119531507	0	1	175	0	0	102	8.7483	8.36892e-11	9.61723e-11	ENSMUST00000079611	Frg2f1	UTR5
17565	peak_17565	chrX	106837456	106837581	33.1477	-	106837456	106837581	0	1	125	0	0	103	8.74134	9.16121e-11	1.05086e-10	ENSMUST00000062010	Rtl3	UTR3
7684	peak_7684	chr7	106507416	106507566	32.9757	-	106507416	106507566	0	1	150	0	0	87	8.73925	1.03438e-10	1.18389e-10	ENSMUST00000184842	Gm8995	UTR3
11511	peak_11511	chr11	48866327	48866677	118.532	-	48866327	48866677	0	1	350	0	5	1664	8.73562	6.19974e-37	2.08127e-36	ENSMUST00000097271	Irgm1	LastExon
780	peak_780	chr1	130448445	130448595	33.3746	-	130448445	130448595	0	1	150	0	0	93	8.72959	7.80299e-11	8.97916e-11	ENSMUST00000140725	Cd55	UTR3
12404	peak_12404	chr12	40315445	40315495	31.5428	-	40315445	40315495	0	1	50	0	0	89	8.71551	2.8548e-10	3.19658e-10	ENSMUST00000069637	Zfp277	UTR3
6645	peak_6645	chr7	18988573	18988723	31.8464	+	18988573	18988723	0	1	150	0	0	112	8.69851	2.30448e-10	2.5899e-10	ENSMUST00000063563	Nanos2	UTR3
11293	peak_11293	chr11	109489941	109490016	31.3927	+	109489941	109490016	0	1	75	0	0	103	8.69411	3.17502e-10	3.54704e-10	ENSMUST00000106697	Arsg	UTR5
8503	peak_8503	chr8	45398417	45398592	33.0972	-	45398417	45398592	0	1	175	0	0	88	8.69185	9.49355e-11	1.08834e-10	ENSMUST00000209772	Tlr3	Exon
11530	peak_11530	chr11	50832405	50832455	31.2282	-	50832405	50832455	0	1	50	0	0	86	8.68599	3.56456e-10	3.97543e-10	ENSMUST00000109133	Zfp879	UTR3
14012	peak_14012	chr15	73571439	73571589	32.3504	+	73571439	73571589	0	1	150	0	0	110	8.68425	1.61221e-10	1.82618e-10	ENSMUST00000173292	Dennd3	UTR3
2494	peak_2494	chr2	181023195	181023295	32.3027	-	181023195	181023295	0	1	100	0	0	135	8.68318	1.66822e-10	1.88769e-10	ENSMUST00000067120	Chrna4	UTR3
12931	peak_12931	chr13	111870965	111871140	33.8143	+	111870965	111871140	0	1	175	0	0	117	8.67468	5.71142e-11	6.62021e-11	ENSMUST00000128198	Gm15326	UTR5
10255	peak_10255	chr10	117683563	117683663	32.1147	+	117683563	117683663	0	1	100	0	0	98	8.64854	1.90592e-10	2.15032e-10	ENSMUST00000020399	Cpm	UTR3
5172	peak_5172	chr5	9511776	9511901	32.6579	-	9511776	9511901	0	1	125	0	0	100	8.64813	1.29621e-10	1.47572e-10	ENSMUST00000004076	Grm3	Exon
7690	peak_7690	chr7	109387752	109387852	31.3574	-	109387752	109387852	0	1	100	0	0	129	8.64644	3.25443e-10	3.63483e-10	ENSMUST00000120160	Gm9105	UTR3
14170	peak_14170	chr15	100816722	100816797	30.3163	+	100816722	100816797	0	1	75	0	0	87	8.63563	6.79929e-10	7.47955e-10	ENSMUST00000023776	Slc4a8	UTR3
16792	peak_16792	chr19	28964769	28964844	31.4761	+	28964769	28964844	0	1	75	0	0	104	8.6344	2.99299e-10	3.34771e-10	ENSMUST00000045674	Plpp6	LastExon
9302	peak_9302	chr9	121908905	121909055	31.6449	+	121908905	121909055	0	1	150	0	0	105	8.6337	2.65699e-10	2.97811e-10	ENSMUST00000050327	Ackr2	LastExon
16896	peak_16896	chr19	46004227	46004327	30.2725	+	46004227	46004327	0	1	100	0	0	132	8.61759	7.01402e-10	7.71001e-10	ENSMUST00000099393	Hps6	LastExon
11516	peak_11516	chr11	49017073	49017173	28.6736	-	49017073	49017173	0	1	100	0	0	82	8.61296	2.16922e-09	2.33547e-09	ENSMUST00000101295	9930111J21Rik2	UTR3
14351	peak_14351	chr15	74750980	74751055	30.5366	-	74750980	74751055	0	1	75	0	0	112	8.61188	5.81527e-10	6.42029e-10	ENSMUST00000023259	Lynx1	UTR3
6160	peak_6160	chr6	25669256	25669356	30.4046	-	25669256	25669356	0	1	100	0	0	115	8.61125	6.38648e-10	7.03552e-10	ENSMUST00000054867	Gpr37	LastExon
5173	peak_5173	chr5	9511951	9512126	30.3699	-	9511951	9512126	0	1	175	0	0	104	8.59795	6.54459e-10	7.20701e-10	ENSMUST00000004076	Grm3	Exon
2550	peak_2550	chr3	27335597	27335772	31.433	+	27335597	27335772	0	1	175	0	0	88	8.59747	3.08565e-10	3.44917e-10	ENSMUST00000046383	Tnfsf10	LastExon
10831	peak_10831	chr11	49652507	49652557	30.7178	+	49652507	49652557	0	1	50	0	0	114	8.59716	5.11361e-10	5.66262e-10	ENSMUST00000020617	Flt4	UTR3
9868	peak_9868	chr9	123964225	123964375	31.5352	-	123964225	123964375	0	1	150	0	0	92	8.58776	2.87011e-10	3.21332e-10	ENSMUST00000026911	Ccr1	LastExon
3164	peak_3164	chr3	89870698	89870748	32.8752	-	89870698	89870748	0	1	50	0	0	116	8.57602	1.11115e-10	1.26937e-10	ENSMUST00000029559	Il6ra	UTR3
4692	peak_4692	chr5	63807169	63807219	20.2782	+	63807169	63807219	0	1	50	0	0	113	8.57413	7.80879e-07	7.86401e-07	ENSMUST00000159584	Nwd2	LastExon
9884	peak_9884	chr10	5605562	5605612	30.7052	+	5605562	5605612	0	1	50	0	0	78	8.56636	5.16037e-10	5.71225e-10	ENSMUST00000051809	Myct1	UTR3
10623	peak_10623	chr10	103030190	103030340	33.5403	-	103030190	103030340	0	1	150	0	0	165	8.55953	6.93822e-11	8.00491e-11	ENSMUST00000170026	Gm17028	UTR3
6487	peak_6487	chr6	126534177	126534227	31.1644	-	126534177	126534227	0	1	50	0	0	105	8.5583	3.72922e-10	4.15513e-10	ENSMUST00000060972	Kcna5	LastExon
11750	peak_11750	chr11	83002332	83002407	31.2609	-	83002332	83002407	0	1	75	0	0	80	8.53878	3.48399e-10	3.88631e-10	ENSMUST00000108152	Slfn8	UTR3
5139	peak_5139	chr5	149430097	149430247	32.051	+	149430097	149430247	0	1	150	0	0	113	8.53681	1.9945e-10	2.24739e-10	ENSMUST00000201083	Medag	UTR3
12949	peak_12949	chr13	117656789	117656889	30.9136	+	117656789	117656889	0	1	100	0	0	78	8.5165	4.45178e-10	4.94399e-10	ENSMUST00000207599	Hcn1	UTR5
5849	peak_5849	chr6	48678490	48678615	30.1836	+	48678490	48678615	0	1	125	0	0	84	8.47656	7.46818e-10	8.20055e-10	ENSMUST00000054050	Gimap9	UTR3
9636	peak_9636	chr9	66818818	66819118	49.306	-	66818818	66819118	0	1	300	0	1	337	8.47334	9.80951e-16	1.43688e-15	ENSMUST00000169282	Aph1c	UTR3
2750	peak_2750	chr3	94402206	94402256	30.5634	+	94402206	94402256	0	1	50	0	0	118	8.46192	5.70629e-10	6.30233e-10	ENSMUST00000050975	Lingo4	LastExon
10126	peak_10126	chr10	80514250	80514300	17.8236	+	80514250	80514300	0	1	50	0	0	163	8.45746	4.3e-06	4.31074e-06	ENSMUST00000051773	Onecut3	UTR3
17594	peak_17594	chrX	141722869	141723044	30.6221	-	141722869	141723044	0	1	175	0	0	97	8.45619	5.47348e-10	6.05089e-10	ENSMUST00000067841	Irs4	Exon
2551	peak_2551	chr3	27335847	27335972	28.5305	+	27335847	27335972	0	1	125	0	0	81	8.42267	2.39906e-09	2.579e-09	ENSMUST00000046383	Tnfsf10	UTR3
7630	peak_7630	chr7	98682435	98682585	29.1958	-	98682435	98682585	0	1	150	0	0	76	8.42124	1.50116e-09	1.62623e-09	ENSMUST00000148776	Gm15506	UTR3
16456	peak_16456	chr18	38589317	38589417	31.1215	-	38589317	38589417	0	1	100	0	0	134	8.41732	3.8442e-10	4.28055e-10	ENSMUST00000025295	Spry4	UTR3
9264	peak_9264	chr9	117254191	117254391	44.8083	+	117254191	117254391	0	1	200	0	1	299	8.41637	2.36796e-14	3.24613e-14	ENSMUST00000172075	Gm17396	UTR5
12823	peak_12823	chr13	58408202	58408252	27.2371	+	58408202	58408252	0	1	50	0	0	77	8.41028	5.96608e-09	6.32158e-09	ENSMUST00000224479	Rmi1	LastExon
9625	peak_9625	chr9	65389458	65389583	28.8953	-	65389458	65389583	0	1	125	0	0	82	8.40642	1.85507e-09	2.00287e-09	ENSMUST00000068307	Kbtbd13	UTR3
149	peak_149	chr1	70728999	70729074	30.1302	+	70728999	70729074	0	1	75	0	0	80	8.40492	7.75743e-10	8.50971e-10	ENSMUST00000159205	Vwc2l	UTR5
13059	peak_13059	chr13	49230814	49230989	30.2932	-	49230814	49230989	0	1	175	0	0	86	8.36941	6.9107e-10	7.60022e-10	ENSMUST00000021816	Susd3	UTR3
16564	peak_16564	chr18	77729755	77729805	26.6961	-	77729755	77729805	0	1	50	0	0	83	8.36612	8.73435e-09	9.1974e-09	ENSMUST00000180530	A330094K24Rik	UTR3
14212	peak_14212	chr15	6814451	6814701	47.0922	-	6814451	6814701	0	1	250	0	1	285	8.36006	4.69588e-15	6.66559e-15	ENSMUST00000022746	Osmr	UTR3
16258	peak_16258	chr18	60301919	60301969	29.6955	+	60301919	60301969	0	1	50	0	0	69	8.35974	1.05537e-09	1.15014e-09	ENSMUST00000171297	F830016B08Rik	UTR3
13370	peak_13370	chr14	32816970	32817045	29.8112	+	32816970	32817045	0	1	75	0	0	88	8.35784	9.72348e-10	1.06156e-09	ENSMUST00000228481	Tmem273	UTR3
9032	peak_9032	chr9	58006132	58006207	27.6768	+	58006132	58006207	0	1	75	0	0	77	8.33968	4.37615e-09	4.66067e-09	ENSMUST00000181289	Gm17322	UTR5
16816	peak_16816	chr19	37433136	37433286	26.9273	+	37433136	37433286	0	1	150	0	0	79	8.33762	7.42212e-09	7.8357e-09	ENSMUST00000192635	Gm38345	UTR3
6220	peak_6220	chr6	40544635	40544710	27.1536	-	40544635	40544710	0	1	75	0	0	80	8.33165	6.32752e-09	6.69812e-09	ENSMUST00000216766	Olfr461	UTR3
9762	peak_9762	chr9	105698931	105699006	29.3151	-	105698931	105699006	0	1	75	0	0	90	8.33109	1.38016e-09	1.49716e-09	ENSMUST00000166431	Col6a6	Exon
199	peak_199	chr1	88138831	88138906	29.0834	+	88138831	88138906	0	1	75	0	0	105	8.30828	1.62458e-09	1.75798e-09	ENSMUST00000124852	Ugt1a6a	UTR5
16313	peak_16313	chr18	76146357	76146457	26.3381	+	76146357	76146457	0	1	100	0	0	87	8.305	1.12444e-08	1.17878e-08	ENSMUST00000167921	Zbtb7c	UTR3
9521	peak_9521	chr9	54027130	54027180	28.0665	-	54027130	54027180	0	1	50	0	0	77	8.30068	3.32763e-09	3.5575e-09	ENSMUST00000098760	Tnfaip8l3	LastExon
3900	peak_3900	chr4	150143617	150143717	28.2144	+	150143617	150143717	0	1	100	0	0	74	8.29222	2.99958e-09	3.21087e-09	ENSMUST00000030826	Slc2a5	UTR3
2932	peak_2932	chr3	145314333	145314408	28.5784	+	145314333	145314408	0	1	75	0	0	77	8.28089	2.31929e-09	2.49477e-09	ENSMUST00000029848	Col24a1	Exon
3939	peak_3939	chr4	155775606	155775656	29.2627	+	155775606	155775656	0	1	50	0	0	111	8.27131	1.43181e-09	1.55252e-09	ENSMUST00000180784	Gm26840	UTR5
1108	peak_1108	chr2	24394685	24394760	29.0316	+	24394685	24394760	0	1	75	0	0	112	8.26994	1.68529e-09	1.82224e-09	ENSMUST00000166388	Psd4	Exon
9254	peak_9254	chr9	111367381	111367456	28.2969	+	111367381	111367456	0	1	75	0	0	88	8.26989	2.83006e-09	3.03236e-09	ENSMUST00000078626	Trank1	Exon
3390	peak_3390	chr4	11126805	11126855	29.5397	+	11126805	11126855	0	1	50	0	0	115	8.2684	1.17774e-09	1.28136e-09	ENSMUST00000142297	Gm11827	UTR5
10805	peak_10805	chr11	43491017	43491067	27.2091	+	43491017	43491067	0	1	50	0	0	107	8.25344	6.08449e-09	6.44511e-09	ENSMUST00000057679	C1qtnf2	LastExon
9149	peak_9149	chr9	95228991	95229266	137.475	+	95228991	95229266	0	1	275	0	7	1518	8.25325	1.00176e-42	4.12813e-42	ENSMUST00000033463	Slc9a9	LastExon
10985	peak_10985	chr11	70460007	70460057	28.3009	+	70460007	70460057	0	1	50	0	0	139	8.24754	2.82144e-09	3.02403e-09	ENSMUST00000147289	Zmynd15	UTR5
7639	peak_7639	chr7	99813688	99813738	17.4705	-	99813688	99813738	0	1	50	0	0	115	8.24034	5.49393e-06	5.50609e-06	ENSMUST00000036331	Neu3	LastExon
8535	peak_8535	chr8	68461165	68461215	30.6751	-	68461165	68461215	0	1	50	0	0	187	8.2372	5.27205e-10	5.83259e-10	ENSMUST00000136060	Csgalnact1	Exon
10335	peak_10335	chr10	12941182	12941257	29.6869	-	12941182	12941257	0	1	75	0	0	154	8.23415	1.06213e-09	1.15707e-09	ENSMUST00000163425	Stx11	LastExon
10046	peak_10046	chr10	70282873	70282948	26.9978	+	70282873	70282948	0	1	75	0	0	94	8.22747	7.062e-09	7.46175e-09	ENSMUST00000155933	Slc16a9	UTR5
6542	peak_6542	chr6	146108398	146108448	27.546	-	146108398	146108448	0	1	50	0	0	70	8.22738	4.79633e-09	5.10295e-09	ENSMUST00000079573	Itpr2	UTR3
15198	peak_15198	chr17	6037835	6038235	68.3177	+	6037835	6038235	0	1	400	0	3	836	8.22702	1.43603e-21	2.71843e-21	ENSMUST00000154114	Synj2	UTR3
9809	peak_9809	chr9	108404466	108404666	45.9275	-	108404466	108404666	0	1	200	0	1	282	8.22513	1.07182e-14	1.49437e-14	ENSMUST00000076592	Ccdc36	UTR3
14350	peak_14350	chr15	74750855	74750905	27.6568	-	74750855	74750905	0	1	50	0	0	88	8.22037	4.43762e-09	4.72586e-09	ENSMUST00000023259	Lynx1	UTR3
697	peak_697	chr1	85941436	85941536	29.5302	-	85941436	85941536	0	1	100	0	0	121	8.2178	1.18562e-09	1.28978e-09	ENSMUST00000086975	Gpr55	LastExon
11909	peak_11909	chr11	106381403	106382583	28.6959	-	106381403	106382583	0	2	21154	0,1026	0	123	8.20908	2.13519e-09	2.29968e-09	ENSMUST00000106809	Icam2	UTR3
15054	peak_15054	chr16	36603993	36604143	26.8936	-	36603993	36604143	0	1	150	0	0	73	8.203	7.60041e-09	8.02056e-09	ENSMUST00000154485	Cd86	UTR3
3628	peak_3628	chr4	106748119	106748169	28.6478	+	106748119	106748169	0	1	50	0	0	121	8.19371	2.20923e-09	2.37768e-09	ENSMUST00000140541	Acot11	UTR3
10245	peak_10245	chr10	112272391	112455644	25.3585	+	112272391	112455644	0	2	13,37	0,183216	0	77	8.18886	2.24056e-08	2.32455e-08	ENSMUST00000218445	Kcnc2	UTR5
7635	peak_7635	chr7	99625191	99625241	27.0591	-	99625191	99625241	0	1	50	0	0	70	8.17524	6.76377e-09	7.15177e-09	ENSMUST00000178124	Tpbgl	UTR3
6269	peak_6269	chr6	59353635	59353685	27.9552	-	59353635	59353685	0	1	50	0	0	83	8.17214	3.59827e-09	3.84288e-09	ENSMUST00000051065	Gprin3	LastExon
9134	peak_9134	chr9	86756158	86756208	28.2431	+	86756158	86756208	0	1	50	0	0	88	8.17179	2.93959e-09	3.14762e-09	ENSMUST00000036426	Prss35	LastExon
10888	peak_10888	chr11	58219673	58219748	26.3485	+	58219673	58219748	0	1	75	0	0	72	8.17137	1.11615e-08	1.1703e-08	ENSMUST00000108836	Irgm2	LastExon
7537	peak_7537	chr7	66392416	66392491	25.1812	-	66392416	66392491	0	1	75	0	0	80	8.16248	2.53913e-08	2.62844e-08	ENSMUST00000015278	Aldh1a3	UTR3
4567	peak_4567	chr5	14858902	14859277	100.394	+	14858902	14859277	0	1	375	0	5	857	8.14266	2.16574e-31	6.00167e-31	ENSMUST00000030691	Pclo	UTR3
6128	peak_6128	chr6	3374581	3374856	44.7415	-	3374581	3374856	0	1	275	0	1	221	8.13869	2.4828e-14	3.39986e-14	ENSMUST00000120087	Samd9l	LastExon
3635	peak_3635	chr4	107084688	107084738	27.9048	+	107084688	107084738	0	1	50	0	0	94	8.13767	3.72807e-09	3.97934e-09	ENSMUST00000106756	Cyb5rl	UTR3
12941	peak_12941	chr13	112999640	112999740	25.1927	+	112999640	112999740	0	1	100	0	0	76	8.13312	2.51849e-08	2.60769e-08	ENSMUST00000092089	Mcidas	UTR3
10801	peak_10801	chr11	42626857	42627032	44.2318	+	42626857	42627032	0	1	175	0	1	234	8.12789	3.56791e-14	4.84073e-14	ENSMUST00000007797	Gabrb2	LastExon
14806	peak_14806	chr16	38362350	38362500	26.4787	+	38362350	38362500	0	1	150	0	0	77	8.12184	1.01784e-08	1.06938e-08	ENSMUST00000114739	Popdc2	UTR5
7593	peak_7593	chr7	81968246	81968671	44.7719	-	81968246	81968671	0	1	425	0	1	270	8.11466	2.42991e-14	3.32899e-14	ENSMUST00000026096	Bnc1	UTR3
1814	peak_1814	chr2	24421200	24421325	25.8566	-	24421200	24421325	0	1	125	0	0	73	8.10827	1.57923e-08	1.64588e-08	ENSMUST00000028355	Pax8	UTR3
11517	peak_11517	chr11	49019723	49019773	24.3724	-	49019723	49019773	0	1	50	0	0	65	8.09974	4.47813e-08	4.60434e-08	ENSMUST00000101295	9930111J21Rik2	LastExon
4227	peak_4227	chr4	119530957	119531007	26.5448	-	119530957	119531007	0	1	50	0	0	77	8.09819	9.71422e-09	1.02146e-08	ENSMUST00000079611	Frg2f1	LastExon
12697	peak_12697	chr13	24899969	24900019	26.8078	+	24899969	24900019	0	1	50	0	0	68	8.09673	8.07557e-09	8.51232e-09	ENSMUST00000006893	D130043K22Rik	UTR3
4071	peak_4071	chr4	49845419	49845594	29.0629	-	49845419	49845594	0	1	175	0	0	188	8.07695	1.64827e-09	1.78318e-09	ENSMUST00000131797	Grin3a	UTR3
10835	peak_10835	chr11	50797340	50797390	26.2578	+	50797340	50797390	0	1	50	0	0	64	8.07383	1.19009e-08	1.24627e-08	ENSMUST00000142118	Adamts2	UTR5
6413	peak_6413	chr6	116695104	116695179	27.4025	-	116695104	116695179	0	1	75	0	0	88	8.06436	5.30962e-09	5.63683e-09	ENSMUST00000056623	Tmem72	LastExon
17359	peak_17359	chrX	143099943	143100093	27.0566	+	143099943	143100093	0	1	150	0	0	76	8.06426	6.77644e-09	7.16389e-09	ENSMUST00000165829	Rtl9	Exon
16271	peak_16271	chr18	61990953	61991003	25.5758	+	61990953	61991003	0	1	50	0	0	82	8.04843	1.92379e-08	1.99942e-08	ENSMUST00000236759	Sh3tc2	Exon
10640	peak_10640	chr10	114401272	114401347	24.8578	-	114401272	114401347	0	1	75	0	0	66	8.03442	3.18772e-08	3.28905e-08	ENSMUST00000061632	Trhde	UTR3
3791	peak_3791	chr4	132580296	132580721	46.6364	+	132580296	132580721	0	1	425	0	2	474	8.03408	6.48517e-15	9.14219e-15	ENSMUST00000070690	Ptafr	LastExon
5642	peak_5642	chr5	138976763	138976838	29.3584	-	138976763	138976838	0	1	75	0	0	150	8.03319	1.3388e-09	1.45292e-09	ENSMUST00000046901	Pdgfa	UTR3
10403	peak_10403	chr10	44441163	44441213	27.2788	-	44441163	44441213	0	1	50	0	0	74	8.02001	5.79347e-09	6.14126e-09	ENSMUST00000218369	Prdm1	Exon
2247	peak_2247	chr2	143826627	143826677	26.4759	-	143826627	143826677	0	1	50	0	0	76	8.01799	1.01982e-08	1.07139e-08	ENSMUST00000099296	Bfsp1	UTR3
1824	peak_1824	chr2	25194940	25194990	27.8484	-	25194940	25194990	0	1	50	0	0	97	8.01735	3.8793e-09	4.13802e-09	ENSMUST00000081869	Tor4a	LastExon
17656	peak_17656	chrX	167478529	167478579	27.1861	-	167478529	167478579	0	1	50	0	0	89	8.01649	6.18388e-09	6.54881e-09	ENSMUST00000112145	Frmpd4	Exon
13604	peak_13604	chr14	119869106	119869594	61.8605	+	119869106	119869594	0	1	488	0	3	767	8.00364	1.36837e-19	2.38856e-19	ENSMUST00000065904	Hs6st3	LastExon
688	peak_688	chr1	82453032	82453082	25.1657	-	82453032	82453082	0	1	50	0	0	78	7.99664	2.56666e-08	2.65679e-08	ENSMUST00000087050	Col4a4	UTR3
7104	peak_7104	chr7	126449073	126449123	26.4893	+	126449073	126449123	0	1	50	0	0	84	7.99301	1.01007e-08	1.06153e-08	ENSMUST00000133300	Rabep2	UTR5
9484	peak_9484	chr9	45255436	45256186	82.0662	-	45255436	45256186	0	1	750	0	4	1132	7.98532	8.8077e-26	1.97519e-25	ENSMUST00000176222	Il10ra	UTR3
7882	peak_7882	chr7	144895834	144895909	28.6616	-	144895834	144895909	0	1	75	0	0	187	7.97132	2.18788e-09	2.35499e-09	ENSMUST00000180930	Gm26793	UTR3
17648	peak_17648	chrX	167242945	167242995	23.7133	-	167242945	167242995	0	1	50	0	0	62	7.96736	7.10664e-08	7.27093e-08	ENSMUST00000049023	Tlr8	LastExon
7499	peak_7499	chr7	45832407	45832482	28.5322	-	45832407	45832482	0	1	75	0	0	127	7.95944	2.39614e-09	2.57601e-09	ENSMUST00000211713	Grin2d	UTR3
6832	peak_6832	chr7	45416166	45416241	24.7111	+	45416166	45416241	0	1	75	0	0	61	7.95902	3.53335e-08	3.64098e-08	ENSMUST00000058879	Ntf5	UTR3
12921	peak_12921	chr13	104694752	104694827	26.314	+	104694752	104694827	0	1	75	0	0	70	7.95847	1.14377e-08	1.19869e-08	ENSMUST00000131215	2610204G07Rik	UTR5
13251	peak_13251	chr13	100188983	100189133	26.021	-	100188983	100189133	0	1	150	0	0	65	7.9521	1.40613e-08	1.46859e-08	ENSMUST00000167986	Naip2	Exon
3051	peak_3051	chr3	54898792	54899192	398.517	-	54898792	54899192	0	1	400	0	56	9052	7.94659	8.09219e-123	1.08251e-120	ENSMUST00000070342	Sertm1	UTR3
5941	peak_5941	chr6	88205579	88205629	26.2091	+	88205579	88205629	0	1	50	0	0	121	7.94308	1.23172e-08	1.28907e-08	ENSMUST00000015197	Gata2	UTR3
6964	peak_6964	chr7	90382693	90382793	24.8849	+	90382693	90382793	0	1	100	0	0	67	7.93965	3.12675e-08	3.22765e-08	ENSMUST00000098310	Sytl2	UTR5
1990	peak_1990	chr2	63972456	63972706	44.8337	-	63972456	63972706	0	1	250	0	2	341	7.93822	2.32455e-14	3.18933e-14	ENSMUST00000131615	Fign	UTR3
16132	peak_16132	chr18	37302423	37302473	26.4516	+	37302423	37302473	0	1	50	0	0	130	7.93157	1.03733e-08	1.0896e-08	ENSMUST00000051754	Pcdhb3	LastExon
2226	peak_2226	chr2	131822905	131822980	25.2931	-	131822905	131822980	0	1	75	0	0	60	7.93063	2.34694e-08	2.43234e-08	ENSMUST00000210606	5330413P13Rik	UTR3
4033	peak_4033	chr4	43505727	43505777	25.1273	-	43505727	43505777	0	1	50	0	0	65	7.93026	2.63717e-08	2.72849e-08	ENSMUST00000139119	Gm12454	UTR3
10380	peak_10380	chr10	40002449	40002499	24.8472	-	40002449	40002499	0	1	50	0	0	60	7.92897	3.21169e-08	3.3132e-08	ENSMUST00000163705	Mfsd4b1	UTR3
3074	peak_3074	chr3	64134015	64134065	25.3099	-	64134015	64134065	0	1	50	0	0	57	7.92745	2.31867e-08	2.40418e-08	ENSMUST00000077958	Vmn2r2	Exon
12916	peak_12916	chr13	102706035	102706385	62.7185	+	102706035	102706385	0	1	350	0	3	508	7.92391	7.45415e-20	1.31783e-19	ENSMUST00000022124	Cd180	LastExon
12257	peak_12257	chr12	100061570	100061745	41.2136	+	100061570	100061745	0	1	175	0	1	338	7.91663	3.02575e-13	3.92166e-13	ENSMUST00000049788	Kcnk13	LastExon
15991	peak_15991	chr17	85601076	85601151	24.6065	-	85601076	85601151	0	1	75	0	0	72	7.91273	3.80092e-08	3.91487e-08	ENSMUST00000175921	Six3os1	UTR3
15055	peak_15055	chr16	36970050	36970125	25.3024	-	36970050	36970125	0	1	75	0	0	71	7.91151	2.33112e-08	2.41666e-08	ENSMUST00000127808	Fbxo40	UTR3
988	peak_988	chr1	180437086	180437361	38.8075	-	180437086	180437361	0	1	275	0	1	244	7.90307	1.66403e-12	2.07863e-12	ENSMUST00000136521	Stum	UTR3
1080	peak_1080	chr2	11300125	11300175	25.2888	+	11300125	11300175	0	1	50	0	0	64	7.89304	2.35402e-08	2.43954e-08	ENSMUST00000195628	Prkcq	UTR5
10030	peak_10030	chr10	68779477	68779677	42.625	+	68779477	68779677	0	1	200	0	1	223	7.88915	1.11288e-13	1.47433e-13	ENSMUST00000080995	Tmem26	UTR3
3926	peak_3926	chr4	154153581	154153631	25.7026	+	154153581	154153631	0	1	50	0	0	105	7.88624	1.76037e-08	1.8312e-08	ENSMUST00000142665	Wrap73	UTR5
14921	peak_14921	chr16	96315650	96315700	24.4512	+	96315650	96315700	0	1	50	0	0	59	7.88609	4.23812e-08	4.35959e-08	ENSMUST00000099497	B3galt5	LastExon
16983	peak_16983	chr19	5081619	5081669	26.0477	-	5081619	5081669	0	1	50	0	0	80	7.87612	1.38004e-08	1.44168e-08	ENSMUST00000077066	Tmem151a	UTR3
11021	peak_11021	chr11	75266269	75266319	26.6666	+	75266269	75266319	0	1	50	0	0	99	7.86273	8.9196e-09	9.38743e-09	ENSMUST00000102514	Rtn4rl1	UTR3
10721	peak_10721	chr11	3489469	3489519	24.0712	+	3489469	3489519	0	1	50	0	0	71	7.86175	5.53094e-08	5.6736e-08	ENSMUST00000151860	Pla2g3	UTR5
3277	peak_3277	chr3	109782164	109782239	24.8373	-	109782164	109782239	0	1	75	0	0	65	7.85976	3.23463e-08	3.33608e-08	ENSMUST00000128219	Ntng1	UTR3
7910	peak_7910	chr8	13035350	13035500	25.8031	+	13035350	13035500	0	1	150	0	0	80	7.85905	1.63995e-08	1.70805e-08	ENSMUST00000033820	F7	UTR3
2946	peak_2946	chr3	152787058	152787483	200.387	+	152787058	152787483	0	1	425	0	13	1814	7.84461	5.75871e-62	4.75841e-61	ENSMUST00000159899	Pigk	UTR3
7066	peak_7066	chr7	112955361	112956236	148.442	+	112955361	112956236	0	1	875	0	10	1869	7.83755	4.46411e-46	2.063e-45	ENSMUST00000182858	Rassf10	LastExon
17252	peak_17252	chrX	72839650	72839700	22.1813	+	72839650	72839700	0	1	50	0	0	68	7.83247	2.07391e-07	2.10261e-07	ENSMUST00000114553	Gabrq	UTR3
12284	peak_12284	chr12	105592616	105592741	27.0679	+	105592616	105592741	0	1	125	0	0	128	7.82446	6.7214e-09	7.10825e-09	ENSMUST00000001652	Bdkrb2	LastExon
5068	peak_5068	chr5	138997930	138998005	26.3967	+	138997930	138998005	0	1	75	0	0	116	7.82144	1.07871e-08	1.13192e-08	ENSMUST00000100518	6330403L08Rik	UTR5
9945	peak_9945	chr10	36833182	36833232	15.3908	+	36833182	36833232	0	1	50	0	0	73	7.81748	2.32577e-05	2.32762e-05	ENSMUST00000168572	Hs3st5	LastExon
3173	peak_3173	chr3	95139520	95139570	25.3727	-	95139520	95139570	0	1	50	0	0	71	7.81696	2.21814e-08	2.30169e-08	ENSMUST00000013851	Tnfaip8l2	UTR3
10261	peak_10261	chr10	120901656	120901731	23.1391	+	120901656	120901731	0	1	75	0	0	63	7.80961	1.06219e-07	1.08255e-07	ENSMUST00000145987	Gm4473	UTR5
7555	peak_7555	chr7	72080381	72080456	24.5512	-	72080381	72080456	0	1	75	0	0	60	7.8093	3.9515e-08	4.0676e-08	ENSMUST00000206466	Mctp2	UTR3
8359	peak_8359	chr8	123242105	123242155	25.9016	+	123242105	123242155	0	1	50	0	0	89	7.80916	1.52952e-08	1.59529e-08	ENSMUST00000181432	4933417D19Rik	UTR5
243	peak_243	chr1	104934211	104934261	24.1892	+	104934211	104934261	0	1	50	0	0	64	7.80128	5.0909e-08	5.22798e-08	ENSMUST00000062528	Cdh20	Exon
274	peak_274	chr1	131712590	131712640	24.2002	+	131712590	131712640	0	1	50	0	0	61	7.79988	5.05116e-08	5.18808e-08	ENSMUST00000064664	Rab7b	UTR3
11519	peak_11519	chr11	49019923	49020023	24.5671	-	49019923	49020023	0	1	100	0	0	57	7.78399	3.90752e-08	4.02327e-08	ENSMUST00000101295	9930111J21Rik2	LastExon
3692	peak_3692	chr4	119259175	119259225	23.6138	+	119259175	119259225	0	1	50	0	0	68	7.78232	7.61617e-08	7.78999e-08	ENSMUST00000094823	Cldn19	UTR3
1924	peak_1924	chr2	32069649	32069699	25.8625	-	32069649	32069699	0	1	50	0	0	116	7.77611	1.57253e-08	1.63909e-08	ENSMUST00000130178	Fam78a	UTR3
453	peak_453	chr1	182973920	182973970	25.0289	+	182973920	182973970	0	1	50	0	0	66	7.7759	2.82575e-08	2.92121e-08	ENSMUST00000191820	Tlr5	LastExon
6219	peak_6219	chr6	40544535	40544585	23.3168	-	40544535	40544585	0	1	50	0	0	56	7.77456	9.3794e-08	9.57073e-08	ENSMUST00000216766	Olfr461	UTR3
660	peak_660	chr1	74924794	74924844	24.9604	-	74924794	74924844	0	1	50	0	0	94	7.7732	2.96512e-08	3.06314e-08	ENSMUST00000130489	Cfap65	UTR3
13766	peak_13766	chr14	55880594	55880644	23.0511	-	55880594	55880644	0	1	50	0	0	55	7.76933	1.12973e-07	1.15058e-07	ENSMUST00000063871	Cbln3	UTR3
5551	peak_5551	chr5	128583790	128583840	24.3721	-	128583790	128583840	0	1	50	0	0	57	7.75533	4.47929e-08	4.60525e-08	ENSMUST00000134673	5930412G12Rik	UTR3
10053	peak_10053	chr10	74631905	74631955	22.3297	+	74631905	74631955	0	1	50	0	0	56	7.73704	1.86983e-07	1.89712e-07	ENSMUST00000125055	Pcdh15	UTR3
10806	peak_10806	chr11	43491342	43491517	37.1353	+	43491342	43491517	0	1	175	0	1	217	7.73406	5.43693e-12	6.62471e-12	ENSMUST00000057679	C1qtnf2	UTR3
11515	peak_11515	chr11	49016698	49016873	39.3671	-	49016698	49016873	0	1	175	0	1	168	7.72812	1.11928e-12	1.41033e-12	ENSMUST00000101295	9930111J21Rik2	UTR3
2746	peak_2746	chr3	93447229	93447279	25.3353	+	93447229	93447279	0	1	50	0	0	156	7.71416	2.27757e-08	2.36225e-08	ENSMUST00000064257	Tchh	LastExon
3511	peak_3511	chr4	53786391	53786616	43.6503	+	53786391	53786616	0	1	225	0	2	320	7.71272	5.37976e-14	7.24329e-14	ENSMUST00000030124	Tal2	UTR3
12932	peak_12932	chr13	111871265	111871365	23.5585	+	111871265	111871365	0	1	100	0	0	58	7.70935	7.9155e-08	8.09428e-08	ENSMUST00000128198	Gm15326	UTR5
482	peak_482	chr1	192506538	192506738	39.4545	+	192506538	192506738	0	1	200	0	1	263	7.70555	1.05219e-12	1.32739e-12	ENSMUST00000151152	Kcnh1	UTR3
2826	peak_2826	chr3	103885824	103885899	20.7936	+	103885824	103885899	0	1	75	0	0	60	7.7016	5.45758e-07	5.50183e-07	ENSMUST00000029433	Ptpn22	Exon
3310	peak_3310	chr3	125914851	125914901	21.3202	-	125914851	125914901	0	1	50	0	0	57	7.69313	3.78122e-07	3.81929e-07	ENSMUST00000196481	Ugt8a	UTR3
17398	peak_17398	chrX	169300330	169301798	22.4786	+	169300330	169301798	0	2	7,43	0,1425	0	58	7.69216	1.68592e-07	1.71111e-07	ENSMUST00000139146	Arhgap6	UTR3
3480	peak_3480	chr4	44970930	44970980	23.4846	+	44970930	44970980	0	1	50	0	0	66	7.69164	8.3372e-08	8.51957e-08	ENSMUST00000123899	Gm12679	UTR3
10428	peak_10428	chr10	61198511	61198611	25.1962	-	61198511	61198611	0	1	100	0	0	127	7.68649	2.51222e-08	2.60134e-08	ENSMUST00000120336	Adamts14	LastExon
3326	peak_3326	chr3	131322809	131323084	112.235	-	131322809	131323084	0	1	275	0	7	952	7.68581	5.21672e-35	1.63676e-34	ENSMUST00000090246	Sgms2	UTR3
6127	peak_6127	chr6	3374081	3374356	58.7624	-	3374081	3374356	0	1	275	0	3	396	7.68049	1.21911e-18	2.04533e-18	ENSMUST00000120087	Samd9l	LastExon
3787	peak_3787	chr4	131922570	131922620	26.5385	+	131922570	131922620	0	1	50	0	0	137	7.67858	9.75715e-09	1.02591e-08	ENSMUST00000094666	Tmem200b	LastExon
16385	peak_16385	chr18	21552101	21552401	38.1281	-	21552101	21552401	0	1	300	0	1	182	7.67641	2.69306e-12	3.32895e-12	ENSMUST00000122333	Klhl14	UTR3
16744	peak_16744	chr19	10843196	10843296	26.3988	+	10843196	10843296	0	1	100	0	0	126	7.67407	1.07708e-08	1.13027e-08	ENSMUST00000138263	Slc15a3	UTR5
3075	peak_3075	chr3	64134090	64134165	22.4308	-	64134090	64134165	0	1	75	0	0	52	7.67377	1.74277e-07	1.76872e-07	ENSMUST00000077958	Vmn2r2	Exon
12696	peak_12696	chr13	24899769	24899944	38.9683	+	24899769	24899944	0	1	175	0	1	217	7.67123	1.48483e-12	1.85938e-12	ENSMUST00000141572	D130043K22Rik	UTR3
13670	peak_13670	chr14	31524156	31524256	23.0064	-	31524156	31524256	0	1	100	0	0	59	7.67045	1.16585e-07	1.18682e-07	ENSMUST00000150054	Colq	UTR3
1539	peak_1539	chr2	133561030	133561705	144.336	+	133561030	133561705	0	1	675	0	10	1414	7.65335	8.03193e-45	3.5528e-44	ENSMUST00000028836	Bmp2	LastExon
2615	peak_2615	chr3	54797989	54798039	23.4987	+	54797989	54798039	0	1	50	0	0	58	7.63766	8.25492e-08	8.43696e-08	ENSMUST00000029371	Smad9	UTR3
7196	peak_7196	chr7	144842835	144842935	22.3086	+	144842835	144842935	0	1	100	0	1	622	7.63678	1.89752e-07	1.92499e-07	ENSMUST00000105898	Fgf3	LastExon
2881	peak_2881	chr3	126438359	126438434	21.9395	+	126438359	126438434	0	1	75	0	0	57	7.63605	2.45515e-07	2.48627e-07	ENSMUST00000093976	Arsj	LastExon
1983	peak_1983	chr2	58047637	58047837	54.7164	-	58047637	58047837	0	1	200	0	3	394	7.63588	2.12679e-17	3.37846e-17	ENSMUST00000090940	Ermn	UTR3
14628	peak_14628	chr16	5286532	5286582	23.7579	+	5286532	5286582	0	1	50	0	0	56	7.63062	6.8875e-08	7.04959e-08	ENSMUST00000140000	Gm15983	UTR5
16268	peak_16268	chr18	61989828	61989878	24.7696	+	61989828	61989878	0	1	50	0	0	83	7.6227	3.39144e-08	3.49617e-08	ENSMUST00000236759	Sh3tc2	Exon
12252	peak_12252	chr12	98275875	98276175	57.8544	+	98275875	98276175	0	1	300	0	3	393	7.62217	2.31497e-18	3.83793e-18	ENSMUST00000075072	Gpr65	LastExon
469	peak_469	chr1	188212502	188212702	40.8794	+	188212502	188212702	0	1	200	0	2	302	7.61664	3.83753e-13	4.94402e-13	ENSMUST00000110938	Esrrg	UTR3
4710	peak_4710	chr5	65892815	65893015	38.4841	+	65892815	65893015	0	1	200	0	1	224	7.61652	2.09221e-12	2.60098e-12	ENSMUST00000201533	Rhoh	LastExon
6534	peak_6534	chr6	142565313	142565638	224.879	-	142565313	142565638	0	1	325	0	16	1976	7.61427	1.77464e-69	2.01651e-68	ENSMUST00000032374	Kcnj8	UTR3
3161	peak_3161	chr3	89869523	89869723	38.1882	-	89869523	89869723	0	1	200	0	1	191	7.60729	2.58013e-12	3.19316e-12	ENSMUST00000029559	Il6ra	UTR3
10890	peak_10890	chr11	58220498	58220723	42.235	+	58220498	58220723	0	1	225	0	2	319	7.58704	1.46983e-13	1.93199e-13	ENSMUST00000108836	Irgm2	LastExon
17202	peak_17202	chrX	36168947	36169247	124.599	+	36168947	36169247	0	1	300	0	8	909	7.58463	8.67558e-39	3.10359e-38	ENSMUST00000033418	Il13ra1	UTR3
12910	peak_12910	chr13	99246249	99246949	436.873	+	99246249	99246949	0	1	700	0	69	8817	7.58001	1.16775e-134	3.07763e-132	ENSMUST00000056558	Zfp366	LastExon
4187	peak_4187	chr4	114907829	114907979	26.3863	-	114907829	114907979	0	1	150	0	0	200	7.57799	1.08672e-08	1.14005e-08	ENSMUST00000068654	Foxd2	LastExon
1791	peak_1791	chr2	13656894	13656969	22.1484	-	13656894	13656969	0	1	75	0	0	51	7.57166	2.12236e-07	2.15111e-07	ENSMUST00000003509	St8sia6	LastExon
5244	peak_5244	chr5	34217555	34217605	24.5018	-	34217555	34217605	0	1	50	0	0	116	7.57138	4.09057e-08	4.20953e-08	ENSMUST00000094868	Zfyve28	Exon
4577	peak_4577	chr5	21575589	21575900	122.227	+	21575589	21575900	0	1	311	0	9	1059	7.56189	4.61313e-38	1.607e-37	ENSMUST00000035651	Lrrc17	UTR3
3569	peak_3569	chr4	66841359	66841834	101.03	+	66841359	66841834	0	1	475	0	6	773	7.56042	1.38378e-31	3.86321e-31	ENSMUST00000048096	Tlr4	LastExon
12603	peak_12603	chr12	104931273	104931673	55.031	-	104931273	104931673	0	1	400	0	3	521	7.55804	1.70137e-17	2.7166e-17	ENSMUST00000109927	Syne3	UTR3
14917	peak_14917	chr16	95297821	95297921	21.9818	+	95297821	95297921	0	1	100	0	0	52	7.55487	2.38341e-07	2.41445e-07	ENSMUST00000113858	Kcnj15	UTR3
9714	peak_9714	chr9	96436908	96437183	41.2653	-	96436908	96437183	0	1	275	0	2	368	7.54834	2.91685e-13	3.78357e-13	ENSMUST00000070500	BC043934	UTR3
17354	peak_17354	chrX	139809486	139809661	36.9432	+	139809486	139809661	0	1	175	0	1	194	7.54713	6.22712e-12	7.56821e-12	ENSMUST00000054889	Cldn2	UTR3
3602	peak_3602	chr4	100442103	100442853	418.057	+	100442103	100442853	0	1	750	0	44	4909	7.54441	7.39846e-129	1.42002e-126	ENSMUST00000039630	Ror1	LastExon
15049	peak_15049	chr16	35833948	35834148	37.8637	-	35833948	35834148	0	1	200	0	1	205	7.53908	3.24823e-12	3.99842e-12	ENSMUST00000042665	Parp14	UTR3
3278	peak_3278	chr3	109782264	109782589	180.194	-	109782264	109782589	0	1	325	0	12	1742	7.53267	8.61636e-56	5.70483e-55	ENSMUST00000128219	Ntng1	UTR3
5166	peak_5166	chr5	6769604	6770079	109.657	-	6769604	6770079	0	1	475	0	8	871	7.53098	3.20661e-34	9.77259e-34	ENSMUST00000164784	Zfp804b	LastExon
3327	peak_3327	chr3	131342203	131342253	19.9552	-	131342203	131342253	0	1	50	0	0	52	7.52927	9.77662e-07	9.83734e-07	ENSMUST00000197057	Sgms2	LastExon
11502	peak_11502	chr11	46150079	46150279	36.7949	-	46150079	46150279	0	1	200	0	1	168	7.52847	6.91617e-12	8.38776e-12	ENSMUST00000020679	Nipal4	UTR3
6533	peak_6533	chr6	142565238	142565288	21.2772	-	142565238	142565288	0	1	50	0	0	53	7.52723	3.89668e-07	3.93479e-07	ENSMUST00000032374	Kcnj8	UTR3
4306	peak_4306	chr4	129427189	129427489	40.2929	-	129427189	129427489	0	1	300	0	2	292	7.52302	5.80728e-13	7.42381e-13	ENSMUST00000053042	Zbtb8b	UTR3
12554	peak_12554	chr12	90729478	90729528	22.6838	-	90729478	90729528	0	1	50	0	0	53	7.52158	1.46099e-07	1.48419e-07	ENSMUST00000082432	Dio2	LastExon
6076	peak_6076	chr6	128474023	128474123	22.8958	+	128474023	128474123	0	1	100	0	0	53	7.52126	1.25975e-07	1.28138e-07	ENSMUST00000204037	Gm10069	UTR5
7606	peak_7606	chr7	92609536	92609661	35.4333	-	92609536	92609661	0	1	125	0	1	156	7.5067	1.81512e-11	2.1553e-11	ENSMUST00000138267	Ankrd42	UTR3
5012	peak_5012	chr5	130839605	130839705	21.3305	+	130839605	130839705	0	1	100	0	0	53	7.49956	3.75405e-07	3.79206e-07	ENSMUST00000111288	Caln1	UTR3
6833	peak_6833	chr7	45420400	45420575	37.958	+	45420400	45420575	0	1	175	0	1	229	7.49917	3.03854e-12	3.74552e-12	NA	NA	NA
13416	peak_13416	chr14	52213525	52213650	37.322	+	52213525	52213650	0	1	125	0	1	146	7.49296	4.76482e-12	5.82063e-12	ENSMUST00000180857	Gm26590	UTR5
8692	peak_8692	chr8	104442989	104443039	25.3319	-	104442989	104443039	0	1	50	0	0	184	7.48817	2.28303e-08	2.36777e-08	ENSMUST00000212040	Dync1li2	UTR3
9520	peak_9520	chr9	54026855	54026905	21.8467	-	54026855	54026905	0	1	50	0	0	51	7.48108	2.61988e-07	2.65157e-07	ENSMUST00000098760	Tnfaip8l3	UTR3
14342	peak_14342	chr15	73695078	73695153	20.9508	-	73695078	73695153	0	1	75	0	0	51	7.47742	4.89216e-07	4.93379e-07	ENSMUST00000064166	Gpr20	UTR3
12382	peak_12382	chr12	26445177	26445352	35.8775	-	26445177	26445352	0	1	175	0	1	151	7.4748	1.3261e-11	1.58411e-11	ENSMUST00000137792	Rsad2	UTR3
4070	peak_4070	chr4	49844969	49845044	23.1457	-	49844969	49845044	0	1	75	0	0	158	7.47334	1.05726e-07	1.07758e-07	ENSMUST00000131797	Grin3a	UTR3
12913	peak_12913	chr13	102705135	102705360	41.1664	+	102705135	102705360	0	1	225	0	2	274	7.4566	3.12873e-13	4.05215e-13	ENSMUST00000022124	Cd180	LastExon
1307	peak_1307	chr2	74706814	74706864	20.8692	+	74706814	74706864	0	1	50	0	0	51	7.45627	5.17824e-07	5.22082e-07	ENSMUST00000074721	Hoxd8	UTR3
680	peak_680	chr1	80213189	80213239	21.7323	-	80213189	80213239	0	1	50	0	0	59	7.43953	2.83797e-07	2.87032e-07	ENSMUST00000058748	Fam124b	Exon
10032	peak_10032	chr10	68782277	68782577	90.2076	+	68782277	68782577	0	1	300	0	6	643	7.43947	2.84115e-28	6.99512e-28	ENSMUST00000080995	Tmem26	UTR3
10931	peak_10931	chr11	61147611	61147811	38.2824	+	61147611	61147811	0	1	200	0	1	305	7.43816	2.41308e-12	2.99124e-12	ENSMUST00000123378	Tnfrsf13b	UTR5
17324	peak_17324	chrX	107171521	107171696	36.4623	+	107171521	107171696	0	1	175	0	1	146	7.43056	8.75984e-12	1.0562e-11	ENSMUST00000067249	P2ry10b	LastExon
8987	peak_8987	chr9	53373920	53373995	21.5156	+	53373920	53373995	0	1	75	0	0	51	7.42847	3.3002e-07	3.33552e-07	ENSMUST00000051014	Exph5	LastExon
9970	peak_9970	chr10	42959480	42959555	21.2911	+	42959480	42959555	0	1	75	0	0	48	7.42292	3.85892e-07	3.8971e-07	ENSMUST00000105494	Scml4	UTR3
14290	peak_14290	chr15	54251743	54252193	83.5459	-	54251743	54252193	0	1	450	0	5	610	7.41576	3.10359e-26	7.08235e-26	ENSMUST00000079772	Tnfrsf11b	UTR3
1105	peak_1105	chr2	21827952	21828002	21.884	+	21827952	21828002	0	1	50	0	0	47	7.41529	2.5524e-07	2.58386e-07	ENSMUST00000055946	Gpr158	UTR3
16230	peak_16230	chr18	51302942	51303417	118.16	+	51302942	51303417	0	1	475	0	8	947	7.41507	8.05698e-37	2.69298e-36	ENSMUST00000116639	Prr16	LastExon
5384	peak_5384	chr5	104456162	104456462	155.709	-	104456162	104456462	0	1	300	0	11	1091	7.39818	2.66358e-48	1.33922e-47	NA	NA	NA
8125	peak_8125	chr8	76908520	76908770	36.4661	+	76908520	76908770	0	1	250	0	2	270	7.39406	8.73522e-12	1.05345e-11	ENSMUST00000128862	Nr3c2	LastExon
628	peak_628	chr1	64735009	64735509	41.8006	-	64735009	64735509	0	1	500	0	2	675	7.39174	1.9986e-13	2.61069e-13	ENSMUST00000116133	Fzd5	LastExon
340	peak_340	chr1	146901563	146901813	84.2686	+	146901563	146901813	0	1	250	0	5	649	7.38538	1.86189e-26	4.29152e-26	ENSMUST00000128345	Brinp3	UTR3
2614	peak_2614	chr3	54317623	54318248	225.329	+	54317623	54318248	0	1	625	0	25	2823	7.3795	1.29053e-69	1.47592e-68	ENSMUST00000200341	Trpc4	UTR3
4454	peak_4454	chr4	145214362	145214787	136.177	-	145214362	145214787	0	1	425	0	9	1332	7.37728	2.50706e-42	1.01559e-41	ENSMUST00000030336	Tnfrsf1b	UTR3
4675	peak_4675	chr5	44101966	44102191	64.918	+	44101966	44102191	0	1	225	0	4	496	7.37718	1.58014e-20	2.86912e-20	ENSMUST00000072800	Gm16401	UTR5
17641	peak_17641	chrX	163514753	163514828	21.0006	-	163514753	163514828	0	1	75	0	0	47	7.3755	4.7254e-07	4.76643e-07	ENSMUST00000033730	Grpr	UTR3
1649	peak_1649	chr2	156576760	156577085	40.4304	+	156576760	156577085	0	1	325	0	2	510	7.37231	5.27074e-13	6.74915e-13	ENSMUST00000144818	Gm14168	UTR5
5708	peak_5708	chr5	147018029	147018529	429.537	-	147018029	147018529	0	1	500	0	80	7521	7.3716	2.28069e-132	4.97191e-130	ENSMUST00000123092	Lnx2	UTR3
13540	peak_13540	chr14	74706238	74706638	141.108	+	74706238	74706638	0	1	400	0	10	1050	7.37099	7.79511e-44	3.32961e-43	ENSMUST00000036653	Htr2a	LastExon
8235	peak_8235	chr8	106198174	106198274	24.2097	+	106198174	106198274	0	1	100	0	1	173	7.36909	5.01773e-08	5.15404e-08	ENSMUST00000034378	Slc7a6	UTR3
7078	peak_7078	chr7	122671841	122754537	54.072	+	122671841	122754537	0	2	143,32	0,82664	3	387	7.36817	3.35918e-17	5.28101e-17	ENSMUST00000182095	Cacng3	Exon
4340	peak_4340	chr4	132785593	132785943	68.3862	-	132785593	132785943	0	1	350	0	4	931	7.36158	1.36771e-21	2.59242e-21	ENSMUST00000045154	Themis2	Exon
12739	peak_12739	chr13	38195952	38196227	36.4969	+	38195952	38196227	0	1	275	0	3	467	7.36065	8.54921e-12	1.03116e-11	ENSMUST00000127906	Dsp	LastExon
5304	peak_5304	chr5	64924935	64925010	21.0643	-	64924935	64925010	0	1	75	0	0	47	7.35512	4.51986e-07	4.56067e-07	ENSMUST00000059349	Tlr1	LastExon
16216	peak_16216	chr18	39372303	39372453	34.6509	+	39372303	39372453	0	1	150	0	1	134	7.35491	3.15785e-11	3.70705e-11	ENSMUST00000154551	Arhgap26	UTR3
15435	peak_15435	chr17	42504376	42504451	35.178	+	42504376	42504451	0	1	75	0	1	133	7.35346	2.17344e-11	2.57264e-11	ENSMUST00000232968	Ptchd4	UTR3
3510	peak_3510	chr4	53786166	53786341	36.0609	+	53786166	53786341	0	1	175	0	1	169	7.34864	1.16407e-11	1.39508e-11	ENSMUST00000030124	Tal2	UTR3
8988	peak_8988	chr9	53377220	53377270	21.1369	+	53377220	53377270	0	1	50	0	0	47	7.34804	4.29727e-07	4.33681e-07	ENSMUST00000051014	Exph5	LastExon
11514	peak_11514	chr11	48894440	48894640	38.9894	-	48894440	48894640	0	1	200	0	2	233	7.34549	1.46224e-12	1.83239e-12	ENSMUST00000109209	Gm5431	Exon
17322	peak_17322	chrX	106159757	106159932	35.4776	+	106159757	106159932	0	1	175	0	1	136	7.34327	1.75874e-11	2.09017e-11	ENSMUST00000040065	Tlr13	UTR3
3110	peak_3110	chr3	82539957	82540382	83.412	-	82539957	82540382	0	1	425	0	5	598	7.34296	3.41326e-26	7.77092e-26	ENSMUST00000182831	Npy2r	UTR3
17355	peak_17355	chrX	139810411	139810611	35.9047	+	139810411	139810611	0	1	200	0	1	154	7.34141	1.30057e-11	1.55456e-11	ENSMUST00000054889	Cldn2	UTR3
1227	peak_1227	chr2	33646039	33646214	35.839	+	33646039	33646214	0	1	175	0	1	184	7.33612	1.36256e-11	1.627e-11	ENSMUST00000147294	C130021I20Rik	UTR5
16877	peak_16877	chr19	44836467	44836517	22.7594	+	44836467	44836517	0	1	50	0	0	154	7.33462	1.38578e-07	1.40843e-07	ENSMUST00000004340	Pax2	UTR3
5252	peak_5252	chr5	36456028	36456078	21.3583	-	36456028	36456078	0	1	50	0	0	48	7.32402	3.68217e-07	3.71967e-07	ENSMUST00000044964	2210406O10Rik	UTR3
12100	peak_12100	chr12	37178524	37178649	35.0218	+	37178524	37178649	0	1	125	0	1	133	7.32231	2.42799e-11	2.86664e-11	ENSMUST00000041183	Meox2	UTR3
11975	peak_11975	chr11	116224108	116224158	23.0855	-	116224108	116224158	0	1	50	0	0	100	7.31969	1.10292e-07	1.12354e-07	ENSMUST00000037007	Evpl	LastExon
9832	peak_9832	chr9	111055809	111055859	20.7141	-	111055809	111055859	0	1	50	0	0	49	7.30678	5.76751e-07	5.81327e-07	ENSMUST00000199839	Ccrl2	LastExon
8524	peak_8524	chr8	64015644	64016019	67.0635	-	64015644	64016019	0	1	375	0	4	397	7.30573	3.47973e-21	6.48429e-21	ENSMUST00000066166	Tll1	UTR3
2002	peak_2002	chr2	66272505	66273080	184.635	-	66272505	66273080	0	1	575	0	14	1301	7.29575	3.75998e-57	2.62633e-56	ENSMUST00000077489	Scn1a	UTR3
5318	peak_5318	chr5	69110384	69110559	36.9673	-	69110384	69110559	0	1	175	0	2	234	7.28055	6.12122e-12	7.44257e-12	ENSMUST00000054095	Kctd8	LastExon
14122	peak_14122	chr15	89484605	89484730	34.1307	+	89484605	89484730	0	1	125	0	1	128	7.27262	4.56338e-11	5.31671e-11	ENSMUST00000168835	C230037L18Rik	UTR5
10702	peak_10702	chr10	128567672	128567847	34.1803	-	128567672	128567847	0	1	175	0	1	155	7.26353	4.40627e-11	5.13706e-11	ENSMUST00000082059	Erbb3	UTR3
12950	peak_12950	chr13	117656989	117809916	19.5753	+	117656989	117809916	0	2	40,10	0,152917	0	45	7.26321	1.27349e-06	1.28008e-06	ENSMUST00000207599	Hcn1	UTR5
13175	peak_13175	chr13	74213567	74213942	49.8704	-	74213567	74213942	0	1	375	0	3	390	7.26278	6.57441e-16	9.71635e-16	ENSMUST00000109640	Ahrr	UTR3
9330	peak_9330	chr9	7849073	7849248	52.6767	-	7849073	7849248	0	1	175	0	3	308	7.25852	9.00985e-17	1.38912e-16	ENSMUST00000013949	Birc3	UTR3
7225	peak_7225	chr7	6676767	6677217	133.153	-	6676767	6677217	0	1	450	0	10	996	7.25608	2.10011e-41	8.25917e-41	ENSMUST00000122432	Zim1	UTR3
6489	peak_6489	chr6	126639087	126639162	31.3267	-	126639087	126639162	0	1	75	0	1	150	7.25501	3.32639e-10	3.71309e-10	NA	NA	NA
5433	peak_5433	chr5	113795278	113795353	23.0646	-	113795278	113795353	0	1	75	0	0	102	7.23957	1.1192e-07	1.13992e-07	ENSMUST00000067853	Tmem119	LastExon
16249	peak_16249	chr18	58220725	58221025	74.5452	+	58220725	58221025	0	1	300	0	5	510	7.23569	1.76614e-23	3.62802e-23	ENSMUST00000181838	Gm26507	UTR5
6282	peak_6282	chr6	72368873	72369298	131.322	-	72368873	72369298	0	1	425	0	10	1156	7.2345	7.64051e-41	2.93871e-40	ENSMUST00000074231	Vamp5	UTR3
6468	peak_6468	chr6	122849512	122849962	152.983	-	122849512	122849962	0	1	450	0	11	1025	7.22949	1.82283e-47	8.86219e-47	ENSMUST00000042081	C3ar1	UTR3
14215	peak_14215	chr15	7206994	7207544	400.662	-	7206994	7207544	0	1	550	0	101	9796	7.22386	1.76073e-123	2.4481e-121	ENSMUST00000160207	Egflam	UTR3
12579	peak_12579	chr12	101750414	101750589	33.8891	-	101750414	101750589	0	1	175	0	1	137	7.22284	5.4166e-11	6.28591e-11	ENSMUST00000222587	Fbln5	UTR3
5772	peak_5772	chr6	22254725	22255375	432.799	+	22254725	22255375	0	1	650	0	136	12973	7.21983	2.2009e-133	5.1818e-131	ENSMUST00000115383	Cped1	UTR3
11299	peak_11299	chr11	111072427	111073452	338.628	+	111072427	111073452	0	1	1025	0	47	4309	7.20677	2.18531e-104	1.15534e-102	ENSMUST00000042970	Kcnj2	LastExon
4949	peak_4949	chr5	122682094	122682294	33.8932	+	122682094	122682294	0	1	200	0	1	156	7.20449	5.39995e-11	6.26823e-11	ENSMUST00000100737	P2rx7	UTR3
6536	peak_6536	chr6	142828194	142829019	564.948	-	142828194	142829019	0	1	825	0	107	9841	7.19782	3.88935e-174	8.58478e-171	ENSMUST00000205149	St8sia1	UTR3
6671	peak_6671	chr7	24127557	24127657	33.1817	+	24127557	24127657	0	1	100	0	1	146	7.18947	8.94216e-11	1.0264e-10	ENSMUST00000120006	Zfp112	UTR3
10659	peak_10659	chr10	120084307	120084407	33.8557	-	120084307	120084407	0	1	100	0	1	146	7.18471	5.54497e-11	6.43319e-11	ENSMUST00000020449	Helb	UTR3
12847	peak_12847	chr13	67363753	67363928	33.602	+	67363753	67363928	0	1	175	0	1	127	7.18392	6.64185e-11	7.66999e-11	ENSMUST00000057070	Zfp456	UTR3
689	peak_689	chr1	83022565	83022640	19.8193	-	83022565	83022640	0	1	75	0	0	44	7.17042	1.07479e-06	1.08092e-06	ENSMUST00000164473	Slc19a3	Exon
4691	peak_4691	chr5	63800321	63800496	32.7876	+	63800321	63800496	0	1	175	0	1	121	7.16145	1.18202e-10	1.34885e-10	ENSMUST00000162166	Nwd2	UTR3
419	peak_419	chr1	175908815	175908865	32.6601	+	175908815	175908865	0	1	50	0	1	132	7.15679	1.29409e-10	1.4734e-10	ENSMUST00000039725	Exo1	UTR3
907	peak_907	chr1	158936389	158936489	33.5973	-	158936389	158936489	0	1	100	0	1	151	7.14559	6.66389e-11	7.69493e-11	ENSMUST00000159861	Pappa2	Exon
17462	peak_17462	chrX	44366607	44366757	33.0415	-	44366607	44366757	0	1	150	0	1	147	7.14408	9.87327e-11	1.13114e-10	ENSMUST00000115057	Dcaf12l2	LastExon
15011	peak_15011	chr16	26358666	26359041	243.096	-	26358666	26359041	0	1	375	0	29	2389	7.14258	4.57604e-75	6.61783e-74	ENSMUST00000232215	Cldn1	UTR3
12434	peak_12434	chr12	66470267	66470492	35.2343	-	66470267	66470492	0	1	225	0	2	202	7.13293	2.08895e-11	2.47412e-11	ENSMUST00000037181	Mdga2	UTR3
1494	peak_1494	chr2	126035854	126036029	32.2209	+	126035854	126036029	0	1	175	0	1	138	7.13258	1.76815e-10	1.99769e-10	ENSMUST00000138576	Fgf7	UTR5
7373	peak_7373	chr7	29223952	29224052	33.7728	-	29223952	29224052	0	1	100	0	1	127	7.13035	5.88302e-11	6.81375e-11	ENSMUST00000085818	Kcnk6	UTR3
12399	peak_12399	chr12	35504260	35504610	85.1764	-	35504260	35504610	0	1	350	0	6	846	7.12996	9.82697e-27	2.28743e-26	ENSMUST00000116436	Ahr	Exon
7107	peak_7107	chr7	127092556	127092781	35.999	+	127092556	127092781	0	1	225	0	1	364	7.12466	1.21614e-11	1.4562e-11	ENSMUST00000206102	AI467606	LastExon
7075	peak_7075	chr7	121501023	121501223	33.3299	+	121501023	121501223	0	1	200	0	1	136	7.12019	8.05344e-11	9.26192e-11	ENSMUST00000084628	Hs3st2	LastExon
4921	peak_4921	chr5	119682984	119683159	33.3483	+	119682984	119683159	0	1	175	0	1	216	7.11101	7.94917e-11	9.14439e-11	ENSMUST00000018748	Tbx3	LastExon
9905	peak_9905	chr10	14149285	14149835	454.172	+	14149285	14149835	0	1	550	0	96	8597	7.10773	5.07926e-140	1.90829e-137	ENSMUST00000191138	Hivep2	LastExon
17425	peak_17425	chrX	18415680	18416005	115.996	-	18415680	18416005	0	1	325	0	9	778	7.0977	3.70336e-36	1.20742e-35	ENSMUST00000147039	4930578C19Rik	UTR3
4077	peak_4077	chr4	55532067	55532142	32.4962	-	55532067	55532142	0	1	75	0	1	141	7.09561	1.45422e-10	1.65072e-10	ENSMUST00000132746	Klf4	UTR5
15210	peak_15210	chr17	7933296	7933471	33.4065	+	7933296	7933471	0	1	175	0	1	138	7.09045	7.62764e-11	8.7831e-11	ENSMUST00000036370	Tagap	LastExon
6958	peak_6958	chr7	88130987	88131387	139.436	+	88130987	88131387	0	1	400	0	11	931	7.08441	2.5255e-43	1.06053e-42	ENSMUST00000155358	Grm5	UTR3
6962	peak_6962	chr7	89407550	89408575	410.882	+	89407550	89408575	0	1	1025	0	72	6365	7.07776	1.22065e-126	2.05278e-124	ENSMUST00000058755	Fzd4	LastExon
10047	peak_10047	chr10	70284799	70284949	30.951	+	70284799	70284949	0	1	150	0	1	137	7.07733	4.33561e-10	4.81741e-10	ENSMUST00000161841	Gm7097	UTR3
10851	peak_10851	chr11	53437323	53437498	32.9798	+	53437323	53437498	0	1	175	0	1	192	7.06959	1.03132e-10	1.18054e-10	ENSMUST00000018382	Gdf9	LastExon
3606	peak_3606	chr4	101399011	101399136	33.0993	+	101399011	101399136	0	1	125	0	1	121	7.05904	9.47863e-11	1.0867e-10	ENSMUST00000123107	0610043K17Rik	UTR5
9690	peak_9690	chr9	85820915	85822966	33.993	-	85820915	85822966	0	2	123,2	0,2049	2	197	7.05856	5.03135e-11	5.84921e-11	ENSMUST00000185960	9330154J02Rik	UTR3
16359	peak_16359	chr18	6936487	6936587	28.7338	-	6936487	6936587	0	1	100	0	1	123	7.0375	2.07858e-09	2.24007e-09	ENSMUST00000079788	Mkx	UTR3
15248	peak_15248	chr17	21433583	21433808	84.9639	+	21433583	21433808	0	1	225	0	6	502	7.03722	1.14063e-26	2.65052e-26	ENSMUST00000167749	Zfp54	LastExon
5782	peak_5782	chr6	29956953	29957328	48.002	+	29956953	29957328	0	1	375	0	3	335	7.03548	2.46651e-15	3.54788e-15	ENSMUST00000046028	Strip2	UTR3
14208	peak_14208	chr15	5099430	5099730	47.0805	-	5099430	5099730	0	1	300	0	3	319	7.03422	4.73608e-15	6.71994e-15	ENSMUST00000118365	Card6	LastExon
9446	peak_9446	chr9	42520584	42520709	32.9103	-	42520584	42520709	0	1	125	0	1	200	7.031	1.08345e-10	1.23884e-10	ENSMUST00000034515	Grik4	UTR3
3294	peak_3294	chr3	117321519	117321569	32.2197	-	117321519	117321569	0	1	50	0	1	109	7.02587	1.7698e-10	1.99943e-10	ENSMUST00000125664	Plppr4	UTR3
5549	peak_5549	chr5	128583440	128583640	35.6915	-	128583440	128583640	0	1	200	0	2	212	7.0219	1.51221e-11	1.80216e-11	ENSMUST00000134673	5930412G12Rik	UTR3
2117	peak_2117	chr2	110362049	110362299	74.9597	-	110362049	110362299	0	1	250	0	6	503	7.02166	1.31795e-23	2.72191e-23	ENSMUST00000099626	Fibin	UTR3
12395	peak_12395	chr12	32204213	32204788	117.742	-	32204213	32204788	0	1	575	0	9	1008	7.01893	1.08241e-36	3.5988e-36	ENSMUST00000217915	Pik3cg	Exon
13292	peak_13292	chr13	116298955	116299330	38.582	-	116298955	116299330	0	1	375	0	35	3311	7.01396	1.95165e-12	2.43034e-12	ENSMUST00000036060	Isl1	UTR3
11996	peak_11996	chr11	118393800	118394075	61.8814	-	118393800	118394075	0	1	275	0	4	601	6.9998	1.34791e-19	2.35424e-19	ENSMUST00000043722	Lgals3bp	LastExon
4231	peak_4231	chr4	119539344	119539394	21.8144	-	119539344	119539394	0	1	50	0	0	130	6.9967	2.67981e-07	2.71144e-07	ENSMUST00000177165	Frg2f1	UTR3
2868	peak_2868	chr3	122014141	122015041	547.652	+	122014141	122015041	0	1	900	0	534	46810	6.99407	1.25171e-168	1.38142e-165	ENSMUST00000198914	Arhgap29	LastExon
2291	peak_2291	chr2	152931897	152932122	84.1448	-	152931897	152932122	0	1	225	0	6	882	6.99187	2.03174e-26	4.67629e-26	ENSMUST00000099200	Foxs1	UTR3
16182	peak_16182	chr18	37657356	37657531	32.7586	+	37657356	37657531	0	1	175	0	1	140	6.98919	1.20669e-10	1.3762e-10	ENSMUST00000097608	3222401L13Rik	UTR5
1311	peak_1311	chr2	79327095	79327745	383.761	+	79327095	79327745	0	1	650	0	86	6624	6.98649	2.664e-118	2.99623e-116	ENSMUST00000099972	Itga4	UTR3
10473	peak_10473	chr10	76459693	76459818	31.5634	-	76459693	76459818	0	1	125	0	1	131	6.9822	2.81395e-10	3.15124e-10	ENSMUST00000049185	Ybey	UTR3
8324	peak_8324	chr8	121087054	121087254	32.5277	+	121087054	121087254	0	1	200	0	2	204	6.9785	1.42216e-10	1.61506e-10	ENSMUST00000181504	Foxf1	UTR3
10027	peak_10027	chr10	68059368	68059443	30.1239	+	68059368	68059443	0	1	75	0	1	118	6.97655	7.79188e-10	8.54697e-10	ENSMUST00000147556	Rtkn2	UTR3
12302	peak_12302	chr12	110280342	110280417	22.1646	+	110280342	110280417	0	1	75	0	1	201	6.97412	2.09837e-07	2.12704e-07	ENSMUST00000097228	Dio3	UTR3
14228	peak_14228	chr15	11034941	11035441	74.7229	-	11034941	11035441	0	1	500	0	6	598	6.97004	1.55706e-23	3.20749e-23	ENSMUST00000058007	Rxfp3	UTR3
6548	peak_6548	chr6	147075384	147075459	29.2894	-	147075384	147075459	0	1	75	0	1	127	6.96326	1.40536e-09	1.52413e-09	ENSMUST00000100780	Mansc4	LastExon
9327	peak_9327	chr9	124125257	124125357	31.1235	+	124125257	124125357	0	1	100	0	1	118	6.96114	3.83871e-10	4.2747e-10	ENSMUST00000111442	Ccr5	LastExon
17552	peak_17552	chrX	104083383	104083583	105.512	-	104083383	104083583	0	1	200	0	8	615	6.95453	5.91651e-33	1.72913e-32	ENSMUST00000118314	Nexmif	UTR3
15494	peak_15494	chr17	49070853	49071253	93.4632	+	49070853	49071253	0	1	400	0	7	1062	6.947	2.86875e-29	7.32453e-29	ENSMUST00000046254	Lrfn2	Exon
4394	peak_4394	chr4	139738836	139739011	29.9812	-	139738836	139739011	0	1	175	0	1	144	6.93826	8.61951e-10	9.43546e-10	ENSMUST00000030508	Pax7	UTR3
6959	peak_6959	chr7	88131437	88131562	30.604	+	88131437	88131562	0	1	125	0	1	108	6.92271	5.54445e-10	6.12742e-10	ENSMUST00000155358	Grm5	UTR3
1547	peak_1547	chr2	139678477	139678552	21.2216	+	139678477	139678552	0	1	75	0	0	159	6.9211	4.05061e-07	4.08951e-07	ENSMUST00000099307	Ism1	UTR5
1922	peak_1922	chr2	32068524	32068849	34.6236	-	32068524	32068849	0	1	325	0	2	308	6.92084	3.21904e-11	3.77787e-11	ENSMUST00000056406	Fam78a	UTR3
3081	peak_3081	chr3	66973226	66973351	22.5845	-	66973226	66973351	0	1	125	0	2	216	6.90914	1.56574e-07	1.58996e-07	ENSMUST00000162439	Shox2	UTR3
16255	peak_16255	chr18	59410140	59410190	57.6014	+	59410140	59410190	0	1	50	0	4	339	6.89748	2.76952e-18	4.57348e-18	ENSMUST00000080721	Chsy3	LastExon
8112	peak_8112	chr8	72320909	72321359	399.065	+	72320909	72321359	0	1	450	0	73	6914	6.89648	5.45081e-123	7.40388e-121	ENSMUST00000067912	Klf2	LastExon
8241	peak_8241	chr8	106555410	106555860	80.4658	+	106555410	106555860	0	1	450	0	6	981	6.895	2.72326e-25	5.9892e-25	ENSMUST00000080797	Cdh3	LastExon
17652	peak_17652	chrX	167474608	167474808	34.0514	-	167474608	167474808	0	1	200	0	2	217	6.89254	4.82777e-11	5.61697e-11	ENSMUST00000112145	Frmpd4	UTR3
12818	peak_12818	chr13	56537053	56537378	44.177	+	56537053	56537378	0	1	325	0	3	307	6.89197	3.70972e-14	5.02811e-14	ENSMUST00000128668	Fbxl21	UTR3
10458	peak_10458	chr10	70924806	70925231	180.318	-	70924806	70925231	0	1	425	0	20	1413	6.88974	7.8956e-56	5.2335e-55	ENSMUST00000143791	Bicc1	UTR3
11451	peak_11451	chr11	12237757	12237857	29.4907	-	12237757	12237857	0	1	100	0	1	113	6.88855	1.21906e-09	1.32559e-09	ENSMUST00000172956	Cobl	UTR3
2039	peak_2039	chr2	84441905	84442205	149.459	-	84441905	84442205	0	1	300	0	13	895	6.88787	2.17715e-46	1.01974e-45	ENSMUST00000111717	Tfpi	UTR3
10401	peak_10401	chr10	44439376	44439676	79.2692	-	44439376	44439676	0	1	300	0	6	431	6.88723	6.33056e-25	1.37277e-24	ENSMUST00000105490	Prdm1	UTR3
15944	peak_15944	chr17	67844187	67844912	353.3	-	67844187	67844912	0	1	725	0	91	7491	6.88718	6.39491e-109	4.42829e-107	ENSMUST00000024840	Arhgap28	UTR3
79	peak_79	chr1	43029609	43029709	30.3963	+	43029609	43029709	0	1	100	0	1	104	6.8858	6.42425e-10	7.07625e-10	ENSMUST00000179655	Gpr45	UTR5
9711	peak_9711	chr9	95706626	95706676	29.4283	-	95706626	95706676	0	1	50	0	1	135	6.87796	1.27446e-09	1.38421e-09	ENSMUST00000190497	Trpc1	UTR3
7223	peak_7223	chr7	6676142	6676217	30.0842	-	6676142	6676217	0	1	75	0	1	104	6.87695	8.0138e-10	8.78548e-10	ENSMUST00000122432	Zim1	UTR3
12099	peak_12099	chr12	37178424	37178499	30.5406	+	37178424	37178499	0	1	75	0	1	109	6.87542	5.79848e-10	6.40255e-10	ENSMUST00000041183	Meox2	UTR3
1790	peak_1790	chr2	12108456	12109081	306.581	-	12108456	12109081	0	1	625	0	48	3354	6.87268	1.48113e-94	5.1282e-93	ENSMUST00000172791	Itga8	UTR3
2743	peak_2743	chr3	90226159	90226334	32.9891	+	90226159	90226334	0	1	175	0	2	192	6.87068	1.02461e-10	1.17301e-10	ENSMUST00000107373	Rab13	UTR3
3594	peak_3594	chr4	98737031	98737206	29.0369	+	98737031	98737206	0	1	175	0	1	110	6.86585	1.6788e-09	1.81555e-09	ENSMUST00000173659	L1td1	LastExon
2552	peak_2552	chr3	28131725	28132125	248.605	+	28131725	28132125	0	1	400	0	27	1976	6.86183	9.44701e-77	1.4531e-75	ENSMUST00000148827	Pld1	LastExon
11344	peak_11344	chr11	118448307	118448657	66.849	+	118448307	118448657	0	1	350	0	5	767	6.86168	4.04775e-21	7.52371e-21	ENSMUST00000142751	Gm11747	UTR3
12698	peak_12698	chr13	24900544	24900769	31.5131	+	24900544	24900769	0	1	225	0	2	188	6.86126	2.91495e-10	3.2629e-10	ENSMUST00000006893	D130043K22Rik	UTR3
16254	peak_16254	chr18	59409965	59410115	45.5557	+	59409965	59410115	0	1	150	0	3	251	6.86012	1.39491e-14	1.93354e-14	ENSMUST00000080721	Chsy3	LastExon
2007	peak_2007	chr2	66483954	66484104	29.4908	-	66483954	66484104	0	1	150	0	1	128	6.85976	1.21894e-09	1.32553e-09	ENSMUST00000112354	Scn9a	LastExon
10252	peak_10252	chr10	116387651	116388226	296.174	+	116387651	116388226	0	1	575	0	44	3339	6.85323	2.35398e-91	6.96258e-90	ENSMUST00000092167	Ptprb	UTR3
5846	peak_5846	chr6	48650587	48650812	53.6702	+	48650587	48650812	0	1	225	0	4	342	6.85253	4.4648e-17	6.97694e-17	ENSMUST00000203509	Gimap8	Exon
10347	peak_10347	chr10	20399653	20400153	270.975	-	20399653	20400153	0	1	500	0	31	2299	6.84797	1.31339e-83	2.68113e-82	ENSMUST00000169016	Pde7b	UTR3
2998	peak_2998	chr3	36179823	36179873	30.8582	-	36179823	36179873	0	1	50	0	1	109	6.84693	4.63047e-10	5.1376e-10	ENSMUST00000091227	Qrfpr	UTR3
10818	peak_10818	chr11	46480684	46480909	34.3423	+	46480684	46480909	0	1	225	0	2	189	6.84036	3.93006e-11	4.59127e-11	ENSMUST00000109229	Havcr2	UTR3
7159	peak_7159	chr7	131967209	131967284	20.5795	+	131967209	131967284	0	1	75	0	0	116	6.83201	6.33322e-07	6.38201e-07	ENSMUST00000045840	Gpr26	Exon
2501	peak_2501	chr2	181232810	181232985	31.814	-	181232810	181232985	0	1	175	0	1	204	6.82991	2.35878e-10	2.64873e-10	ENSMUST00000149417	Helz2	UTR3
4432	peak_4432	chr4	141890612	141890787	30.293	-	141890612	141890787	0	1	175	0	1	99	6.82351	6.91239e-10	7.60161e-10	ENSMUST00000105780	Fhad1	UTR3
10089	peak_10089	chr10	78078719	78078919	54.5059	+	78078719	78078919	0	1	200	0	4	351	6.81992	2.47026e-17	3.90928e-17	ENSMUST00000105393	Icosl	UTR3
10308	peak_10308	chr10	5021102	5021702	200.034	-	5021102	5021702	0	1	600	0	26	1890	6.80858	7.38156e-62	6.07662e-61	ENSMUST00000215295	Syne1	UTR3
2953	peak_2953	chr3	157644026	157644376	87.4536	+	157644026	157644376	0	1	350	0	8	551	6.80767	1.97752e-27	4.71878e-27	ENSMUST00000173533	Ptger3	UTR3
10574	peak_10574	chr10	81502480	81502580	31.0069	-	81502480	81502580	0	1	100	0	1	159	6.80636	4.16847e-10	4.63432e-10	ENSMUST00000043709	Gna15	UTR3
467	peak_467	chr1	188211702	188211977	136.282	+	188211702	188211977	0	1	275	0	13	916	6.80344	2.32763e-42	9.44422e-42	ENSMUST00000110938	Esrrg	UTR3
1650	peak_1650	chr2	156577285	156577360	29.7641	+	156577285	156577360	0	1	75	0	1	109	6.80297	1.00528e-09	1.09678e-09	ENSMUST00000144818	Gm14168	UTR5
10334	peak_10334	chr10	12940757	12940882	29.341	-	12940757	12940882	0	1	125	0	1	96	6.79986	1.35518e-09	1.47051e-09	ENSMUST00000163425	Stx11	UTR3
2975	peak_2975	chr3	17785038	17785163	32.202	-	17785038	17785163	0	1	125	0	2	166	6.79911	1.79238e-10	2.02417e-10	NA	NA	NA
14593	peak_14593	chr15	101053793	101053868	20.941	-	101053793	101053868	0	1	75	0	0	143	6.79698	4.92596e-07	4.96731e-07	ENSMUST00000178140	Fignl2	LastExon
3112	peak_3112	chr3	83836422	83836722	66.8073	-	83836422	83836722	0	1	300	0	5	439	6.79603	4.16829e-21	7.74449e-21	ENSMUST00000029623	Tlr2	LastExon
1224	peak_1224	chr2	33643389	33643539	28.4754	+	33643389	33643539	0	1	150	0	1	180	6.79442	2.49523e-09	2.67944e-09	ENSMUST00000147294	C130021I20Rik	UTR5
6485	peak_6485	chr6	126533252	126533552	103.497	-	126533252	126533552	0	1	300	0	9	1097	6.79354	2.43987e-32	6.98835e-32	ENSMUST00000060972	Kcna5	UTR3
15155	peak_15155	chr16	91055484	91055534	29.7615	-	91055484	91055534	0	1	50	0	1	97	6.78946	1.00724e-09	1.09877e-09	ENSMUST00000114076	4932438H23Rik	UTR3
2492	peak_2492	chr2	181022670	181022745	28.6471	-	181022670	181022745	0	1	75	0	1	121	6.78297	2.21039e-09	2.37878e-09	ENSMUST00000067120	Chrna4	UTR3
13516	peak_13516	chr14	63948959	63949609	509.767	+	63948959	63949609	0	1	650	0	86	6239	6.78192	4.76669e-157	3.50709e-154	ENSMUST00000079652	Sox7	UTR3
14927	peak_14927	chr16	3964103	3964303	32.3303	-	3964103	3964303	0	1	200	0	2	220	6.76329	1.63571e-10	1.85185e-10	ENSMUST00000163478	Nlrc3	UTR3
1178	peak_1178	chr2	30608614	30608789	29.2381	+	30608614	30608789	0	1	175	0	1	101	6.76031	1.45687e-09	1.57931e-09	ENSMUST00000102853	Cstad	UTR3
14147	peak_14147	chr15	98168905	98169380	158.55	+	98168905	98169380	0	1	475	0	16	1361	6.75966	3.61131e-49	1.8695e-48	ENSMUST00000031914	Ccdc184	UTR3
4068	peak_4068	chr4	49770608	49771408	39.0612	-	49770608	49771408	0	1	800	0	9	832	6.75951	1.38995e-12	1.74341e-12	ENSMUST00000131797	Grin3a	UTR3
14876	peak_14876	chr16	91055575	91055750	29.6713	+	91055575	91055750	0	1	175	0	1	112	6.75947	1.0739e-09	1.16961e-09	ENSMUST00000147848	4931406G06Rik	UTR5
17054	peak_17054	chr19	17328690	17329265	99.0732	-	17328690	17329265	0	1	575	0	9	645	6.75768	5.51111e-31	1.49969e-30	ENSMUST00000235184	Gcnt1	UTR3
4681	peak_4681	chr5	52197066	52197266	29.2922	+	52197066	52197266	0	1	200	0	4	333	6.75396	1.40256e-09	1.52118e-09	ENSMUST00000180601	9230114K14Rik	UTR5
2183	peak_2183	chr2	125629521	125629571	26.2273	-	125629521	125629571	0	1	50	0	1	101	6.74618	1.21578e-08	1.27287e-08	ENSMUST00000110477	Shc4	UTR3
7224	peak_7224	chr7	6676242	6676692	135.847	-	6676242	6676692	0	1	450	0	13	819	6.74335	3.16381e-42	1.27607e-41	ENSMUST00000122432	Zim1	UTR3
10329	peak_10329	chr10	10687883	10688508	96.5133	-	10687883	10688508	0	1	625	0	8	601	6.74075	3.3482e-30	8.84274e-30	ENSMUST00000044306	Grm1	UTR3
4292	peak_4292	chr4	128616345	128616620	43.7469	-	128616345	128616620	0	1	275	0	3	337	6.73873	5.02429e-14	6.7745e-14	ENSMUST00000074829	Tlr12	LastExon
3077	peak_3077	chr3	66053732	66053882	29.5996	-	66053732	66053882	0	1	150	0	1	118	6.73809	1.1293e-09	1.22927e-09	ENSMUST00000029419	Veph1	UTR3
1045	peak_1045	chr1	191170645	191170720	29.947	-	191170645	191170720	0	1	75	0	1	132	6.73451	8.83224e-10	9.66174e-10	ENSMUST00000195117	Atf3	UTR3
17629	peak_17629	chrX	155574154	155574254	27.6067	-	155574154	155574254	0	1	100	0	1	101	6.73404	4.5961e-09	4.89265e-09	ENSMUST00000170236	Ptchd1	UTR3
2549	peak_2549	chr3	27241999	27242199	91.1686	+	27241999	27242199	0	1	200	0	8	565	6.73192	1.44347e-28	3.59353e-28	ENSMUST00000046515	Nceh1	UTR3
14664	peak_14664	chr16	15888286	15888461	255.108	+	15888286	15888461	0	1	175	0	36	2165	6.72652	9.48251e-79	1.60232e-77	ENSMUST00000096232	Cebpd	UTR3
1548	peak_1548	chr2	139757391	139757566	31.8414	+	139757391	139757566	0	1	175	0	2	176	6.72603	2.31255e-10	2.5988e-10	ENSMUST00000099307	Ism1	LastExon
16022	peak_16022	chr18	3512139	3512689	439.177	+	3512139	3512689	0	1	550	0	74	4925	6.71877	2.25876e-135	6.23206e-133	ENSMUST00000025075	Bambi	LastExon
275	peak_275	chr1	131713215	131713365	29.6579	+	131713215	131713365	0	1	150	0	1	106	6.71824	1.08406e-09	1.18053e-09	ENSMUST00000064679	Rab7b	UTR3
10271	peak_10271	chr10	126014734	126015134	252.172	+	126014734	126015134	0	1	400	0	39	2321	6.71672	7.61789e-78	1.22622e-76	ENSMUST00000219974	Lrig3	UTR5
15019	peak_15019	chr16	30309260	30309410	28.7253	-	30309260	30309410	0	1	150	0	1	124	6.71618	2.09105e-09	2.25338e-09	ENSMUST00000061190	Gp5	LastExon
12870	peak_12870	chr13	75763804	75763979	32.5888	+	75763804	75763979	0	1	175	0	2	168	6.71272	1.36121e-10	1.54813e-10	ENSMUST00000221979	Ell2	UTR5
1104	peak_1104	chr2	21368141	21368241	29.4226	+	21368141	21368241	0	1	100	0	1	109	6.70518	1.27956e-09	1.38966e-09	ENSMUST00000155760	Gpr158	UTR5
17251	peak_17251	chrX	72838211	72838386	32.9775	+	72838211	72838386	0	1	175	0	2	185	6.70411	1.03306e-10	1.18246e-10	ENSMUST00000033711	Gabrq	LastExon
15823	peak_15823	chr17	43534723	43534848	27.5147	-	43534723	43534848	0	1	125	0	1	125	6.70396	4.90393e-09	5.21491e-09	ENSMUST00000178772	Ankrd66	UTR3
7869	peak_7869	chr7	143636105	143636280	32.0339	-	143636105	143636280	0	1	175	0	2	163	6.70171	2.01877e-10	2.2743e-10	ENSMUST00000075588	Tnfrsf22	UTR3
16518	peak_16518	chr18	62178366	62178716	108.67	-	62178366	62178716	0	1	350	0	10	666	6.70017	6.41188e-34	1.93706e-33	ENSMUST00000053640	Adrb2	UTR3
7860	peak_7860	chr7	142491548	142491773	32.5846	-	142491548	142491773	0	1	225	0	2	215	6.69313	1.36535e-10	1.55264e-10	ENSMUST00000054910	Prr33	UTR3
14645	peak_14645	chr16	12268503	12268803	51.4257	+	12268503	12268803	0	1	300	0	4	300	6.69083	2.18792e-16	3.30603e-16	ENSMUST00000023138	Shisa9	UTR3
2664	peak_2664	chr3	81954352	81954702	133.699	+	81954352	81954702	0	1	350	0	13	809	6.68642	1.43071e-41	5.65558e-41	ENSMUST00000029649	Ctso	UTR3
15100	peak_15100	chr16	57628332	57628582	41.3661	-	57628332	57628582	0	1	250	0	3	582	6.68607	2.71515e-13	3.52816e-13	ENSMUST00000089332	Col8a1	LastExon
7920	peak_7920	chr8	14091035	14091210	48.9831	+	14091035	14091210	0	1	175	0	4	298	6.68553	1.2319e-15	1.79731e-15	ENSMUST00000098916	Gm10699	UTR5
14132	peak_14132	chr15	92770965	92771065	42.2934	+	92770965	92771065	0	1	100	0	3	210	6.68175	1.41031e-13	1.85526e-13	ENSMUST00000035399	Pdzrn4	LastExon
9728	peak_9728	chr9	98954208	98954578	52.2632	-	98954208	98954578	0	2	26174	0,196	4	330	6.68104	1.20668e-16	1.8501e-16	ENSMUST00000189148	Foxl2os	UTR3
6148	peak_6148	chr6	16834005	16834180	26.4905	-	16834005	16834180	0	1	175	0	1	111	6.68069	1.00913e-08	1.06061e-08	ENSMUST00000202997	Tfec	UTR3
3671	peak_3671	chr4	115835935	115836160	80.6297	+	115835935	115836160	0	1	225	0	7	547	6.68037	2.42484e-25	5.34621e-25	ENSMUST00000030477	Mob3c	UTR3
11536	peak_11536	chr11	50923272	50923397	30.424	-	50923272	50923397	0	1	125	0	2	151	6.67995	6.29982e-10	6.94179e-10	ENSMUST00000164280	Zfp354b	LastExon
3093	peak_3093	chr3	73701649	73701774	31.8621	-	73701649	73701774	0	1	125	0	2	158	6.67828	2.27934e-10	2.5618e-10	ENSMUST00000133690	Bche	UTR3
12915	peak_12915	chr13	102705910	102705960	28.2806	+	102705910	102705960	0	1	50	0	1	99	6.67759	2.86285e-09	3.06693e-09	ENSMUST00000022124	Cd180	LastExon
5194	peak_5194	chr5	24438439	24438639	245.262	-	24438439	24438639	0	1	200	0	32	2076	6.67672	1.00123e-75	1.47454e-74	ENSMUST00000158071	Gm22333	UTR3
13338	peak_13338	chr14	27401744	27402144	147.439	+	27401744	27402144	0	1	400	0	15	1409	6.67385	9.04949e-46	4.13336e-45	ENSMUST00000224981	Arhgef3	LastExon
12370	peak_12370	chr12	17174526	17174726	33.1136	-	17174526	17174726	0	1	200	0	2	327	6.67344	9.3832e-11	1.07597e-10	ENSMUST00000170580	Kcnf1	UTR3
501	peak_501	chr1	4781625	4781700	27.6873	-	4781625	4781700	0	1	75	0	1	97	6.67223	4.34427e-09	4.62701e-09	ENSMUST00000146665	Mrpl15	UTR3
9518	peak_9518	chr9	54026455	54026505	28.5689	-	54026455	54026505	0	1	50	0	1	89	6.66441	2.33555e-09	2.51134e-09	ENSMUST00000098760	Tnfaip8l3	UTR3
6108	peak_6108	chr6	145961627	145962027	101.062	+	145961627	145962027	0	1	400	0	11	737	6.66356	1.35234e-31	3.77782e-31	ENSMUST00000111701	Sspn	UTR3
10228	peak_10228	chr10	102545117	102546092	372.14	+	102545117	102546092	0	1	975	0	67	4352	6.66254	1.03138e-114	9.43629e-113	ENSMUST00000055355	Rassf9	LastExon
9277	peak_9277	chr9	118897787	118898187	203.419	+	118897787	118898187	0	1	400	0	25	1533	6.66205	6.76242e-63	5.81641e-62	ENSMUST00000044165	Itga9	UTR3
14713	peak_14713	chr16	23223589	23223739	28.2494	+	23223589	23223739	0	1	150	0	1	95	6.6592	2.92616e-09	3.1338e-09	ENSMUST00000055369	BC106179	UTR3
8688	peak_8688	chr8	102634044	102634619	433.703	-	102634044	102634619	0	1	575	0	404	23888	6.65695	1.16084e-133	2.77002e-131	ENSMUST00000075190	Cdh11	UTR3
8898	peak_8898	chr9	25603675	25603800	28.7892	+	25603675	25603800	0	1	125	0	1	163	6.65573	1.99953e-09	2.15566e-09	ENSMUST00000040677	Eepd1	UTR3
13892	peak_13892	chr14	104465339	104465858	42.6593	-	104465339	104465858	0	2	26174	0,345	3	315	6.65441	1.08623e-13	1.43966e-13	ENSMUST00000053016	Pou4f1	UTR3
1299	peak_1299	chr2	72256397	72256572	40.027	+	72256397	72256572	0	1	175	0	3	236	6.65329	7.00991e-13	8.9263e-13	ENSMUST00000028525	Rapgef4	UTR3
16870	peak_16870	chr19	43615405	43615580	40.1835	+	43615405	43615580	0	1	175	0	3	307	6.65261	6.27477e-13	8.00866e-13	ENSMUST00000057178	Nkx2-3	UTR3
15239	peak_15239	chr17	17145022	17145197	47.572	+	17145022	17145197	0	1	175	0	4	256	6.65227	3.34481e-15	4.77969e-15	ENSMUST00000147630	Zfp97	LastExon
2364	peak_2364	chr2	160906786	160907036	32.0925	-	160906786	160907036	0	1	250	0	2	191	6.65092	1.93651e-10	2.18373e-10	ENSMUST00000057169	Emilin3	UTR3
17188	peak_17188	chrX	12937546	12937871	145.391	+	12937546	12937871	0	1	325	0	15	985	6.64873	3.83741e-45	1.70984e-44	ENSMUST00000121924	AA414768	UTR5
4399	peak_4399	chr4	139965322	139965547	32.5731	-	139965322	139965547	0	1	225	0	2	272	6.64777	1.37672e-10	1.56506e-10	ENSMUST00000105031	Klhdc7a	LastExon
5751	peak_5751	chr6	9247104	9248729	592.592	+	9247104	9248729	0	1	1625	0	156	9308	6.64487	1.39044e-182	4.09208e-179	ENSMUST00000060369	Nxph1	LastExon
2006	peak_2006	chr2	66483254	66483629	38.782	-	66483254	66483629	0	1	375	0	7	505	6.6436	1.69447e-12	2.11576e-12	ENSMUST00000112354	Scn9a	UTR3
5789	peak_5789	chr6	34368339	34368463	31.7961	+	34368339	34368463	0	1	124	0	2	158	6.6396	2.38884e-10	2.68181e-10	ENSMUST00000038406	Akr1b8	UTR3
16642	peak_16642	chr19	5070252	5070637	352.41	+	5070252	5070637	0	1	385	0	115	13935	6.63767	1.19893e-108	8.2057e-107	ENSMUST00000070630	Cd248	LastExon
13376	peak_13376	chr14	33934623	33934948	66.7103	+	33934623	33934948	0	1	325	0	6	441	6.637	4.46673e-21	8.28329e-21	ENSMUST00000168727	Gdf10	UTR3
7201	peak_7201	chr7	145308818	145309393	147.809	+	145308818	145309393	0	1	575	0	21	2631	6.63578	6.97933e-46	3.20023e-45	ENSMUST00000117718	Mrgprf	UTR3
12101	peak_12101	chr12	40224772	40224972	31.865	+	40224772	40224972	0	1	200	0	2	164	6.63552	2.27458e-10	2.55662e-10	ENSMUST00000171356	Gm7008	UTR5
2134	peak_2134	chr2	119269750	119269925	27.2927	-	119269750	119269925	0	1	175	0	1	166	6.63488	5.73653e-09	6.08236e-09	ENSMUST00000037360	Rhov	UTR3
10930	peak_10930	chr11	61070756	61070906	27.7974	+	61070756	61070906	0	1	150	0	1	108	6.63466	4.02123e-09	4.28708e-09	ENSMUST00000108717	Kcnj12	UTR3
3866	peak_3866	chr4	145827804	145828104	145.461	+	145827804	145828104	0	1	300	0	15	883	6.63153	3.65462e-45	1.62922e-44	ENSMUST00000122051	Znf41-ps	UTR5
7953	peak_7953	chr8	24060718	24060818	28.276	+	24060718	24060818	0	1	100	0	1	103	6.62995	2.87199e-09	3.07653e-09	ENSMUST00000207301	Zmat4	UTR3
14009	peak_14009	chr15	66919358	66919958	155.229	+	66919358	66919958	0	1	600	0	20	1328	6.62639	3.73676e-48	1.86817e-47	ENSMUST00000147079	Ccn4	UTR3
3627	peak_3627	chr4	106747969	106748044	29.6833	+	106747969	106748044	0	1	75	0	1	197	6.62597	1.0648e-09	1.15992e-09	ENSMUST00000140541	Acot11	UTR3
15797	peak_15797	chr17	34978623	34978698	28.8748	-	34978623	34978698	0	1	75	0	1	110	6.62133	1.88255e-09	2.03148e-09	ENSMUST00000151136	Gm10501	UTR3
5320	peak_5320	chr5	72755817	72755992	52.1283	-	72755817	72755992	0	1	175	0	4	258	6.62127	1.32867e-16	2.03149e-16	ENSMUST00000138842	Tec	UTR3
9727	peak_9727	chr9	98950079	98950429	196.662	-	98950079	98950429	0	1	350	0	22	1283	6.61931	7.91191e-61	6.29317e-60	ENSMUST00000181706	Foxl2os	UTR3
6954	peak_6954	chr7	84577097	84577272	29.672	+	84577097	84577272	0	1	175	0	1	183	6.61841	1.07334e-09	1.16907e-09	ENSMUST00000180387	Gm2115	UTR3
21	peak_21	chr1	19234193	19234893	127.032	+	19234193	19234893	0	1	700	0	64	3874	6.61569	1.56699e-39	5.74779e-39	ENSMUST00000064976	Tfap2b	LastExon
3609	peak_3609	chr4	102605024	102605799	553.96	+	102605024	102605799	0	1	775	0	128	8425	6.61469	1.18492e-170	1.74362e-167	ENSMUST00000097949	Pde4b	LastExon
3280	peak_3280	chr3	110135433	110135683	89.5519	-	110135433	110135683	0	1	250	0	8	482	6.61453	4.51408e-28	1.10203e-27	ENSMUST00000128219	Ntng1	Exon
10661	peak_10661	chr10	120091874	120091999	27.8816	-	120091874	120091999	0	1	125	0	1	94	6.6139	3.79011e-09	4.04386e-09	ENSMUST00000148241	Helb	UTR3
5450	peak_5450	chr5	114857957	114858082	27.4553	-	114857957	114858082	0	1	125	0	1	97	6.61298	5.11632e-09	5.4343e-09	ENSMUST00000201635	Gm9936	UTR5
13256	peak_13256	chr13	101683985	101684985	513.786	-	101683985	101684985	0	1	1000	0	289	17519	6.60768	2.81668e-158	2.16247e-155	ENSMUST00000035532	Pik3r1	UTR3
17649	peak_17649	chrX	167243095	167243145	26.179	-	167243095	167243145	0	1	50	0	1	90	6.60699	1.25821e-08	1.31628e-08	ENSMUST00000049023	Tlr8	LastExon
4948	peak_4948	chr5	122681619	122681844	41.9317	+	122681619	122681844	0	1	225	0	3	220	6.60547	1.82087e-13	2.38399e-13	ENSMUST00000100737	P2rx7	UTR3
7094	peak_7094	chr7	125576030	125576130	29.9572	+	125576030	125576130	0	1	100	0	1	220	6.60333	8.76913e-10	9.59388e-10	ENSMUST00000206846	Il4ra	UTR3
12001	peak_12001	chr11	118445074	118448502	84.1096	-	118445074	118448502	0	2	2373	0,3055	8	826	6.60222	2.08267e-26	4.79164e-26	ENSMUST00000142751	Gm11747	UTR3
844	peak_844	chr1	136845108	136845283	51.7628	-	136845108	136845283	0	1	175	0	4	267	6.6015	1.72154e-16	2.61721e-16	ENSMUST00000168126	Nr5a2	UTR3
7044	peak_7044	chr7	107590434	107591094	184.278	+	107590434	107591094	0	1	660	0	24	1627	6.60025	4.84253e-57	3.36386e-56	ENSMUST00000120990	Olfml1	UTR3
9760	peak_9760	chr9	105392850	105392975	25.7158	-	105392850	105392975	0	1	125	0	1	99	6.60011	1.74367e-08	1.81457e-08	ENSMUST00000140851	Nek11	Exon
14306	peak_14306	chr15	58180978	58181403	279.677	-	58180978	58181403	0	1	425	0	48	2764	6.59954	2.79773e-86	6.44098e-85	ENSMUST00000022986	Fbxo32	UTR3
15337	peak_15337	chr17	28228384	28228608	130.378	+	28228384	28228608	0	1	224	0	13	958	6.59777	1.48732e-40	5.65405e-40	ENSMUST00000002327	Def6	UTR3
2929	peak_2929	chr3	142547606	142548231	141.792	+	142547606	142548231	0	1	625	0	15	931	6.59704	4.81046e-44	2.07128e-43	ENSMUST00000045097	Gbp7	UTR3
12928	peak_12928	chr13	110400192	110400717	465.259	+	110400192	110400717	0	1	525	0	181	10149	6.59627	1.9378e-143	8.77376e-141	ENSMUST00000022212	Plk2	LastExon
15576	peak_15576	chr17	84698859	84699034	31.3943	+	84698859	84699034	0	1	175	0	2	189	6.59512	3.17115e-10	3.54294e-10	ENSMUST00000171915	Abcg8	UTR3
7049	peak_7049	chr7	109439967	109440067	27.3032	+	109439967	109440067	0	1	100	0	1	92	6.59458	5.69442e-09	6.03843e-09	ENSMUST00000143715	1700095J03Rik	UTR5
9331	peak_9331	chr9	7860517	7860817	62.707	-	7860517	7860817	0	1	300	0	5	374	6.59456	7.51803e-20	1.32833e-19	ENSMUST00000115672	Birc3	Exon
7994	peak_7994	chr8	35385393	35385943	141.295	+	35385393	35385943	0	1	550	0	19	1207	6.59427	6.83218e-44	2.92325e-43	ENSMUST00000211648	Ppp1r3b	UTR3
9188	peak_9188	chr9	107348218	107348318	28.5112	+	107348218	107348318	0	1	100	0	1	134	6.59166	2.43292e-09	2.61381e-09	ENSMUST00000042581	6430571L13Rik	UTR3
7197	peak_7197	chr7	144843110	144843235	20.1897	+	144843110	144843235	0	1	125	0	4	536	6.58711	8.30467e-07	8.36197e-07	ENSMUST00000105898	Fgf3	UTR3
6897	peak_6897	chr7	73776541	73776916	187.388	+	73776541	73776916	0	1	375	0	23	1805	6.58595	5.41916e-58	3.89465e-57	ENSMUST00000107456	Fam174b	UTR3
9969	peak_9969	chr10	42958555	42958705	26.6846	+	42958555	42958705	0	1	150	0	1	96	6.58571	8.80579e-09	9.27096e-09	ENSMUST00000105494	Scml4	UTR3
14213	peak_14213	chr15	6815101	6815301	31.1337	-	6815101	6815301	0	1	200	0	2	178	6.58448	3.81066e-10	4.24453e-10	ENSMUST00000176826	Osmr	UTR3
4724	peak_4724	chr5	75192443	75195773	451.601	+	75192443	75195773	0	2	229821	0,2509	444	28633	6.58307	3.27445e-139	1.13373e-136	ENSMUST00000168162	Pdgfra	LastExon
9336	peak_9336	chr9	13243989	13244589	637.304	-	13243989	13244589	0	1	600	0	214	11587	6.58285	2.41244e-196	1.41996e-192	ENSMUST00000110582	Jrkl	UTR3
4495	peak_4495	chr4	151144390	151144665	63.9038	-	151144390	151144665	0	1	275	0	5	918	6.58059	3.22845e-20	5.79467e-20	ENSMUST00000049790	Camta1	Exon
6346	peak_6346	chr6	91762333	91762533	32.1031	-	91762333	91762533	0	1	200	0	2	265	6.57709	1.92182e-10	2.16771e-10	ENSMUST00000162293	Grip2	UTR3
13334	peak_13334	chr14	26397969	26398119	29.3982	+	26397969	26398119	0	1	150	0	1	259	6.57623	1.30154e-09	1.41336e-09	ENSMUST00000059648	4933413J09Rik	UTR5
12714	peak_12714	chr13	31630640	31631240	369.821	+	31630640	31631240	0	1	600	0	108	6632	6.57574	5.38467e-114	4.70706e-112	ENSMUST00000042054	Foxf2	LastExon
7407	peak_7407	chr7	30447758	30447933	21.9166	-	30447758	30447933	0	1	175	0	2	169	6.57516	2.49479e-07	2.52612e-07	ENSMUST00000045817	Kirrel2	UTR3
9107	peak_9107	chr9	74889738	74889913	37.8607	+	74889738	74889913	0	1	175	0	3	213	6.5749	3.25524e-12	4.00676e-12	ENSMUST00000056006	Onecut1	UTR3
8758	peak_8758	chr8	115704403	115704978	400.567	-	115704403	115704978	0	1	575	0	80	4330	6.5743	1.89463e-123	2.6137e-121	ENSMUST00000109104	Maf	UTR3
9661	peak_9661	chr9	73930636	73931111	172.697	-	73930636	73931111	0	1	475	0	22	1441	6.57207	1.68305e-53	1.03013e-52	ENSMUST00000075245	Unc13c	Exon
496	peak_496	chr1	3216521	3216771	126.935	-	3216521	3216771	0	1	250	0	13	802	6.56711	1.67892e-39	6.14813e-39	ENSMUST00000070533	Xkr4	LastExon
15174	peak_15174	chr16	96180107	96181569	30.5056	-	96180107	96181569	0	2	13137	0,1325	2	148	6.56615	5.94493e-10	6.55974e-10	ENSMUST00000154445	Lca5l	UTR3
1475	peak_1475	chr2	121007379	121007454	25.8705	+	121007379	121007454	0	1	75	0	1	99	6.56374	1.56364e-08	1.63001e-08	ENSMUST00000110686	Tmem62	UTR3
11623	peak_11623	chr11	67855722	67855922	40.7213	-	67855722	67855922	0	1	200	0	3	371	6.56139	4.29331e-13	5.51636e-13	ENSMUST00000129961	Usp43	UTR3
16529	peak_16529	chr18	66859589	66859639	25.8945	-	66859589	66859639	0	1	50	0	1	101	6.56107	1.53712e-08	1.60312e-08	ENSMUST00000057942	Mc4r	LastExon
10745	peak_10745	chr11	16911707	16912382	109.124	+	16911707	16912382	0	1	675	0	44	2884	6.56083	4.65979e-34	1.41379e-33	ENSMUST00000020329	Egfr	LastExon
14202	peak_14202	chr15	3319559	3320334	250.805	-	3319559	3320334	0	1	775	0	49	2887	6.55683	2.00091e-77	3.16312e-76	ENSMUST00000161561	Ghr	UTR3
4217	peak_4217	chr4	119178281	119178381	30.0007	-	119178281	119178381	0	1	100	0	2	195	6.55662	8.50097e-10	9.30857e-10	ENSMUST00000127574	Ermap	UTR3
9507	peak_9507	chr9	52002623	52002848	41.4286	-	52002623	52002848	0	1	225	0	3	319	6.55557	2.59761e-13	3.37866e-13	ENSMUST00000182467	Gm6981	UTR3
16178	peak_16178	chr18	37520002	37520177	30.0902	+	37520002	37520177	0	1	175	0	1	263	6.5534	7.97913e-10	8.74855e-10	ENSMUST00000097609	Pcdhb22	LastExon
3307	peak_3307	chr3	123117202	123117277	27.8993	-	123117202	123117277	0	1	75	0	1	144	6.5447	3.7428e-09	3.99458e-09	ENSMUST00000198584	Synpo2	Exon
5389	peak_5389	chr5	105272603	105273003	143.908	-	105272603	105273003	0	1	400	0	14	787	6.53979	1.08683e-44	4.7799e-44	ENSMUST00000199944	Gbp6	UTR3
8091	peak_8091	chr8	71488427	71488527	27.9483	+	71488427	71488527	0	1	100	0	1	105	6.53915	3.61557e-09	3.86112e-09	ENSMUST00000168847	Gtpbp3	UTR5
468	peak_468	chr1	188212052	188212377	83.6515	+	188212052	188212377	0	1	325	0	9	514	6.53552	2.87859e-26	6.58252e-26	ENSMUST00000110938	Esrrg	UTR3
1107	peak_1107	chr2	23399769	23400144	271.099	+	23399769	23400144	0	1	375	0	34	1843	6.53291	1.1987e-83	2.46124e-82	ENSMUST00000102945	Nxph2	LastExon
13538	peak_13538	chr14	74641539	74641589	26.0324	+	74641539	74641589	0	1	50	0	1	86	6.53077	1.39489e-08	1.45703e-08	ENSMUST00000036653	Htr2a	UTR5
2013	peak_2013	chr2	71527871	71537661	461.67	-	71527871	71537661	0	3	83,335,82	0,4912,9708	445	26818	6.52501	2.51141e-142	1.05587e-139	ENSMUST00000137251	Dlx1as	UTR3
8875	peak_8875	chr9	21027782	21028382	354.424	+	21027782	21028382	0	1	600	0	54	3731	6.52223	2.88806e-109	2.03177e-107	ENSMUST00000086399	Icam1	LastExon
16256	peak_16256	chr18	59410290	59410440	40.3929	+	59410290	59410440	0	1	150	0	3	198	6.52132	5.41154e-13	6.92693e-13	ENSMUST00000080721	Chsy3	LastExon
6267	peak_6267	chr6	58935164	58935564	200.499	-	58935164	58935564	0	1	400	0	33	2196	6.52126	5.32298e-62	4.40456e-61	ENSMUST00000089860	Fam13a	UTR3
15796	peak_15796	chr17	34977848	34978098	49.3763	-	34977848	34978098	0	1	250	0	4	317	6.51963	9.33418e-16	1.36851e-15	ENSMUST00000151136	Gm10501	UTR3
6505	peak_6505	chr6	129428583	129428933	115.894	-	129428583	129428933	0	1	350	0	11	725	6.51747	3.97594e-36	1.29509e-35	ENSMUST00000037481	Clec1a	UTR3
466	peak_466	chr1	188211077	188211352	117.844	+	188211077	188211352	0	1	275	0	15	980	6.51596	1.00659e-36	3.35304e-36	ENSMUST00000110938	Esrrg	LastExon
6135	peak_6135	chr6	12317134	12317334	54.4901	-	12317134	12317334	0	1	200	0	5	284	6.51595	2.49835e-17	3.95233e-17	ENSMUST00000137836	Thsd7a	UTR3
2931	peak_2931	chr3	145314233	145314283	29.8093	+	145314233	145314283	0	1	50	0	2	139	6.51546	9.73635e-10	1.0629e-09	ENSMUST00000029848	Col24a1	Exon
2982	peak_2982	chr3	26133325	26133725	598.554	-	26133325	26133725	0	1	400	0	312	18121	6.51179	1.85926e-184	6.56618e-181	ENSMUST00000192774	Nlgn1	UTR3
4284	peak_4284	chr4	127311420	127312220	267.963	-	127311420	127312220	0	1	800	0	57	6187	6.51051	1.09912e-82	2.16369e-81	ENSMUST00000053753	Gja4	UTR3
5848	peak_5848	chr6	48678040	48678365	155.059	+	48678040	48678365	0	1	325	0	18	977	6.50847	4.21545e-48	2.10154e-47	ENSMUST00000054050	Gimap9	LastExon
6075	peak_6075	chr6	128473373	128473898	79.1294	+	128473373	128473898	0	1	525	0	7	467	6.50489	6.99155e-25	1.5124e-24	ENSMUST00000204037	Gm10069	UTR5
5847	peak_5847	chr6	48658871	48659196	75.6392	+	48658871	48659196	0	1	325	0	7	446	6.50431	8.15897e-24	1.69955e-23	ENSMUST00000078223	Gimap8	UTR3
8460	peak_8460	chr8	24438140	24438715	384.57	-	24438140	24438715	0	1	575	0	64	4107	6.5038	1.49058e-118	1.70913e-116	ENSMUST00000052622	Tcim	UTR3
1355	peak_1355	chr2	91115386	91115756	65.5033	+	91115386	91115756	0	1	370	0	5	947	6.50375	1.04743e-20	1.91228e-20	ENSMUST00000002180	Spi1	LastExon
8619	peak_8619	chr8	83887278	83887453	27.2366	-	83887278	83887453	0	1	175	0	1	95	6.50327	5.96831e-09	6.32356e-09	ENSMUST00000181723	Gm26721	UTR3
3608	peak_3608	chr4	101815153	101815253	26.2274	+	101815153	101815253	0	1	100	0	1	87	6.49604	1.21562e-08	1.27278e-08	ENSMUST00000037552	Lepr	LastExon
2038	peak_2038	chr2	84332975	84333600	332.456	-	84332975	84333600	0	1	625	0	73	3804	6.49498	1.71716e-102	8.33012e-101	ENSMUST00000099944	Calcrl	UTR3
11109	peak_11109	chr11	83069789	83070139	61.9175	+	83069789	83070139	0	1	350	0	5	339	6.4931	1.31391e-19	2.296e-19	ENSMUST00000038038	Slfn2	LastExon
1734	peak_1734	chr2	177477932	177478129	286.328	+	177477932	177478129	0	1	197	0	63	3546	6.49273	2.51762e-88	6.4058e-87	ENSMUST00000099002	Zfp970	UTR3
6161	peak_6161	chr6	27363583	27363733	25.8125	-	27363583	27363733	0	1	150	0	1	91	6.48252	1.62899e-08	1.69694e-08	ENSMUST00000090512	Grm8	Exon
9345	peak_9345	chr9	14750633	14750708	25.9066	-	14750633	14750708	0	1	75	0	1	99	6.48221	1.524e-08	1.58981e-08	ENSMUST00000061498	Fut4	UTR3
12767	peak_12767	chr13	47244597	47245247	177.676	+	47244597	47245247	0	1	650	0	21	1561	6.48182	5.06369e-55	3.26808e-54	ENSMUST00000110111	Rnf144b	UTR3
10845	peak_10845	chr11	53186508	53186708	52.4261	+	53186508	53186708	0	1	200	0	4	502	6.48057	1.07532e-16	1.65256e-16	ENSMUST00000036796	Fstl4	LastExon
11756	peak_11756	chr11	83441717	83441942	92.5787	-	83441717	83441942	0	1	225	0	9	699	6.47804	5.34192e-29	1.35217e-28	ENSMUST00000103209	Mmp28	UTR3
8654	peak_8654	chr8	87468853	87469028	28.9455	-	87468853	87469028	0	1	175	0	2	197	6.47698	1.79071e-09	1.93432e-09	ENSMUST00000211279	Cbln1	UTR3
17399	peak_17399	chrX	169302828	169303078	57.1479	+	169302828	169303078	0	1	250	0	5	456	6.47198	3.81626e-18	6.26278e-18	ENSMUST00000139146	Arhgap6	UTR3
7468	peak_7468	chr7	43528530	43528780	39.2868	-	43528530	43528780	0	1	250	0	3	197	6.4716	1.18472e-12	1.49108e-12	ENSMUST00000206371	Cd33	UTR3
3603	peak_3603	chr4	100549910	100550085	37.728	+	100549910	100550085	0	1	175	0	3	189	6.47127	3.57471e-12	4.39264e-12	ENSMUST00000092730	Ube2u	LastExon
15123	peak_15123	chr16	76290999	76291874	507.248	-	76290999	76291874	0	1	875	0	254	14295	6.46744	2.84609e-156	2.01025e-153	ENSMUST00000054178	Nrip1	UTR3
15002	peak_15002	chr16	19982756	19982956	68.7498	-	19982756	19982956	0	1	200	0	6	384	6.46203	1.05561e-21	2.01491e-21	ENSMUST00000165530	Klhl6	UTR3
16777	peak_16777	chr19	23165673	23165723	27.7384	+	23165673	23165723	0	1	50	0	2	135	6.46202	4.19086e-09	4.46577e-09	ENSMUST00000036884	Klf9	UTR3
1399	peak_1399	chr2	110011748	110012798	372.141	+	110011748	110012798	0	1	1050	0	114	6526	6.45981	1.02509e-114	9.42761e-113	ENSMUST00000111037	Lgr4	LastExon
16589	peak_16589	chr18	80968925	80969625	145.817	-	80968925	80969625	0	1	700	0	194	12030	6.45761	2.8407e-45	1.27248e-44	ENSMUST00000057950	Sall3	UTR3
17592	peak_17592	chrX	141713547	141721594	28.2975	-	141713547	141721594	0	2	11,64	0,7983	2	158	6.45644	2.82849e-09	3.03104e-09	ENSMUST00000067841	Irs4	UTR3
16897	peak_16897	chr19	46004402	46004502	27.5975	+	46004402	46004502	0	1	100	0	1	165	6.45569	4.62595e-09	4.92404e-09	ENSMUST00000099393	Hps6	LastExon
2993	peak_2993	chr3	32950132	32950257	25.8117	-	32950132	32950257	0	1	125	0	1	82	6.45353	1.62997e-08	1.69785e-08	ENSMUST00000108226	Pex5l	UTR3
548	peak_548	chr1	36266076	36266251	39.9934	-	36266076	36266251	0	1	175	0	3	198	6.45285	7.17977e-13	9.13667e-13	ENSMUST00000056946	Neurl3	UTR3
11873	peak_11873	chr11	101973267	101973692	370.351	-	101973267	101973692	0	1	425	0	70	4609	6.44632	3.69327e-114	3.26078e-112	ENSMUST00000125794	Dusp3	UTR3
10029	peak_10029	chr10	68779052	68779427	117.851	+	68779052	68779427	0	1	375	0	13	724	6.44174	1.00116e-36	3.33618e-36	ENSMUST00000080995	Tmem26	UTR3
4716	peak_4716	chr5	73012220	73012320	24.1144	+	73012220	73012320	0	1	100	0	5	470	6.44087	5.36513e-08	5.50608e-08	ENSMUST00000201304	Slc10a4	LastExon
15434	peak_15434	chr17	42503926	42504101	50.2568	+	42503926	42504101	0	1	175	0	4	255	6.43865	5.0037e-16	7.43356e-16	ENSMUST00000232968	Ptchd4	UTR3
9694	peak_9694	chr9	87704724	87705849	412.474	-	87704724	87705849	0	1	1125	0	229	12867	6.43697	3.85466e-127	6.80656e-125	ENSMUST00000034991	Tbx18	UTR3
11562	peak_11562	chr11	59161140	59161240	26.4822	-	59161140	59161240	0	1	100	0	1	86	6.43123	1.01526e-08	1.06673e-08	ENSMUST00000069631	Iba57	UTR3
17504	peak_17504	chrX	86747519	86747794	53.7601	-	86747519	86747794	0	1	275	0	5	309	6.43045	4.18915e-17	6.55548e-17	ENSMUST00000078875	Il1rapl1	LastExon
3372	peak_3372	chr4	3790335	3790685	109.007	+	3790335	3790685	0	1	350	0	12	653	6.42947	5.06196e-34	1.53344e-33	ENSMUST00000103010	Lyn	UTR3
8930	peak_8930	chr9	37413466	37414016	355.173	+	37413466	37414016	0	1	550	0	62	3834	6.42686	1.70368e-109	1.20818e-107	ENSMUST00000115046	Robo4	UTR3
4339	peak_4339	chr4	132783434	132785318	39.8474	-	132783434	132785318	0	2	64136	0,1748	3	321	6.42472	7.96222e-13	1.01098e-12	ENSMUST00000045154	Themis2	Exon
4997	peak_4997	chr5	128602505	128603130	289.807	+	128602505	128603130	0	1	625	0	87	5669	6.42446	2.15053e-89	5.74494e-88	ENSMUST00000117102	Fzd10	LastExon
4108	peak_4108	chr4	68761763	68762238	216.221	-	68761763	68762238	0	1	475	0	35	2013	6.42136	8.04553e-67	8.1461e-66	ENSMUST00000030036	Brinp1	UTR3
8057	peak_8057	chr8	69663704	69664170	153.553	+	69663704	69664170	0	1	466	0	21	1056	6.41858	1.22145e-47	5.97132e-47	ENSMUST00000169125	Zfp964	LastExon
13969	peak_13969	chr15	35300668	35300843	28.0361	+	35300668	35300843	0	1	175	0	2	246	6.41835	3.39999e-09	3.63332e-09	ENSMUST00000227655	Osr2	UTR5
11386	peak_11386	chr11	121707834	121714715	58.0557	+	121707834	121714715	0	2	281,19	0,6862	5	505	6.41427	2.00968e-18	3.33806e-18	ENSMUST00000125580	Metrnl	Exon
8434	peak_8434	chr8	13256212	13256937	424.907	-	13256212	13256937	0	1	725	0	295	20398	6.41398	5.9273e-131	1.23134e-128	ENSMUST00000204673	Dcun1d2	UTR3
5246	peak_5246	chr5	35706045	35706370	72.8846	-	35706045	35706370	0	1	325	0	6	870	6.41253	5.69903e-23	1.14695e-22	ENSMUST00000151555	Sh3tc1	UTR3
2928	peak_2928	chr3	142547281	142547356	25.6311	+	142547281	142547356	0	1	75	0	1	107	6.41193	1.85065e-08	1.92432e-08	ENSMUST00000045097	Gbp7	UTR3
4397	peak_4397	chr4	139964947	139965122	29.2099	-	139964947	139965122	0	1	175	0	2	169	6.40991	1.48627e-09	1.61049e-09	ENSMUST00000105031	Klhdc7a	UTR3
13902	peak_13902	chr14	110749752	110750077	58.0979	-	110749752	110750077	0	1	325	0	5	279	6.40756	1.95051e-18	3.24191e-18	ENSMUST00000078386	Slitrk6	LastExon
16250	peak_16250	chr18	58556606	58556656	26.1791	+	58556606	58556656	0	1	50	0	1	104	6.40576	1.25802e-08	1.31616e-08	ENSMUST00000025500	Slc27a6	Exon
2927	peak_2927	chr3	142547056	142547106	26.3161	+	142547056	142547106	0	1	50	0	1	79	6.40345	1.14193e-08	1.1969e-08	ENSMUST00000045097	Gbp7	UTR3
4135	peak_4135	chr4	84276094	84291272	94.5451	-	84276094	84291272	0	3	353,34,13	0,1811,15165	27	2395	6.40295	1.33933e-29	3.46012e-29	ENSMUST00000177277	Bnc2	UTR3
15614	peak_15614	chr17	6799114	6799264	37.2219	-	6799114	6799264	0	1	150	0	3	173	6.40245	5.11426e-12	6.23886e-12	ENSMUST00000181895	Gm2885	UTR3
7056	peak_7056	chr7	110629088	110629538	228.105	+	110629088	110629538	0	1	450	0	29	2114	6.40233	1.81417e-70	2.15576e-69	ENSMUST00000033054	Adm	LastExon
12225	peak_12225	chr12	85290481	85290631	27.4885	+	85290481	85290631	0	1	150	0	1	121	6.3989	4.99612e-09	5.31039e-09	ENSMUST00000059341	Zc2hc1c	Exon
10744	peak_10744	chr11	16281922	16282522	252.329	+	16281922	16282522	0	1	600	0	53	2563	6.39557	6.81428e-78	1.09988e-76	ENSMUST00000207256	Vstm2a	UTR3
1716	peak_1716	chr2	169886158	169887033	285.056	+	169886158	169887033	0	1	875	0	75	4574	6.39485	6.16085e-88	1.54749e-86	ENSMUST00000180945	Gm26883	UTR3
17553	peak_17553	chrX	104083733	104084183	389.88	-	104083733	104084183	0	1	450	0	91	4605	6.39145	3.56314e-120	4.30945e-118	ENSMUST00000056502	Nexmif	UTR3
15135	peak_15135	chr16	85862219	85863169	262.321	-	85862219	85863169	0	1	950	0	53	2789	6.39105	5.80644e-81	1.0804e-79	ENSMUST00000023611	Adamts5	UTR3
1280	peak_1280	chr2	65764663	65765238	322.996	+	65764663	65765238	0	1	575	0	61	2943	6.39042	1.33559e-99	5.86664e-98	ENSMUST00000100067	Scn2a	LastExon
9683	peak_9683	chr9	85324563	85325113	124.948	-	85324563	85325113	0	1	550	0	18	1059	6.38786	6.78757e-39	2.43806e-38	ENSMUST00000187711	Tent5a	LastExon
13522	peak_13522	chr14	66637127	66637352	57.1329	+	66637127	66637352	0	1	225	0	5	403	6.38774	3.85782e-18	6.32805e-18	ENSMUST00000159068	Adra1a	UTR5
679	peak_679	chr1	80200105	80200280	30.0112	-	80200105	80200280	0	1	175	0	2	185	6.38459	8.43708e-10	9.24091e-10	ENSMUST00000058748	Fam124b	LastExon
10889	peak_10889	chr11	58220248	58220448	38.2756	+	58220248	58220448	0	1	200	0	3	191	6.38346	2.42496e-12	3.00533e-12	ENSMUST00000108836	Irgm2	LastExon
8984	peak_8984	chr9	51849621	51850721	342.065	+	51849621	51850721	0	1	1100	0	179	9941	6.37828	1.85456e-105	1.06671e-103	ENSMUST00000130405	Arhgap20	LastExon
4400	peak_4400	chr4	139965597	139966422	49.1131	-	139965597	139966422	0	1	825	0	11	1596	6.37769	1.12406e-15	1.64242e-15	ENSMUST00000105031	Klhdc7a	LastExon
11545	peak_11545	chr11	53565437	53565587	25.565	-	53565437	53565587	0	1	150	0	1	80	6.37717	1.93885e-08	2.01449e-08	ENSMUST00000153461	A430108G06Rik	UTR3
7699	peak_7699	chr7	110871090	110871390	63.9044	-	110871090	110871390	0	1	300	0	6	497	6.37551	3.22642e-20	5.79221e-20	ENSMUST00000125758	Mrvi1	UTR3
6112	peak_6112	chr6	147033086	147033511	84.3003	+	147033086	147033511	0	1	425	0	9	552	6.37523	1.82056e-26	4.19843e-26	ENSMUST00000036194	Rep15	LastExon
7868	peak_7868	chr7	143635730	143635780	25.2961	-	143635730	143635780	0	1	50	0	1	112	6.37485	2.34168e-08	2.42718e-08	ENSMUST00000075588	Tnfrsf22	UTR3
5761	peak_5761	chr6	18321228	18321403	57.2556	+	18321228	18321403	0	1	175	0	5	295	6.37428	3.53655e-18	5.8124e-18	ENSMUST00000045706	Cftr	UTR3
[truncated: 16,980 more rows]
