# Supplementary material for: VIRMA-mediated m6A modification is essential for active ribosome biogenesis
Source: Research Square preprint supplement (doi:10.21203/rs.3.rs-3604242/v1), 2023-12-11
Supplement: Supplementary file 2 [file 8536b770218c08d079947626.xlsx]

## Sheet: S4 Differentially expressed pro
Gene name	Protein accession	cKO/WT Ratio	cKO/WT P value	Up or Down	cKO_1	cKO_2	cKO_3	cKO_4	WT_1	WT_2	WT_3	WT_4	Protein description	MW [kDa]	Coverage [%]	Peptides	Unique Peptides
Cacna2d2	Q6PHS9	1.3354	0.0153385	Up	1.023	1.2	1.202	1.158	0.886	0.83	1.021	0.695	Voltage-dependent calcium channel subunit alpha-2/delta-2 OS=Mus musculus OX=10090 GN=Cacna2d2 PE=1 SV=1	130.3	4	4	4
Fam210a	Q8BGY7	1.6868	0.0325647	Up	1.117	0.898	1.369	1.641	0.877	0.868	0.487	0.747	Protein FAM210A OS=Mus musculus OX=10090 GN=Fam210a PE=1 SV=1	31.6	8	2	2
Mxra7	Q9CZH7	1.6927	0.047538	Up	1.248	1.263	1.451	1.072	0.354	0.781	0.919	0.92	Matrix-remodeling-associated protein 7 OS=Mus musculus OX=10090 GN=Mxra7 PE=1 SV=2	19.4	19	3	3
Fam171a2	A2A699	1.5025	0.000460899	Up	1.114	1.263	1.184	1.247	0.856	0.883	0.709	0.752	Protein FAM171A2 OS=Mus musculus OX=10090 GN=Fam171a2 PE=1 SV=1	87.4	8	4	4
Clcn6	O35454	1.2795	0.0378978	Up	1.114	1.003	1.184	1.199	0.996	0.756	0.996	0.769	Chloride transport protein 6 OS=Mus musculus OX=10090 GN=Clcn6 PE=1 SV=1	96.9	6	4	4
Fxn	O35943	1.443	0.027153	Up	1.115	1.483	0.925	1.213	0.659	0.876	0.938	0.809	Frataxin, mitochondrial OS=Mus musculus OX=10090 GN=Fxn PE=1 SV=1	22.9	25	4	4
Acot1	O55137	1.2452	0.0426139	Up	0.875	1.173	1.196	1.204	0.826	0.93	0.878	0.938	Acyl-coenzyme A thioesterase 1 OS=Mus musculus OX=10090 GN=Acot1 PE=1 SV=1	46.1	31	12	5
Umps	P13439	1.4983	0.00626736	Up	1.19	1.373	0.98	1.265	0.659	0.801	0.881	0.868	Uridine 5'-monophosphate synthase OS=Mus musculus OX=10090 GN=Umps PE=1 SV=3	52.3	58	25	25
Apex1	P28352	1.5034	0.0142767	Up	1.093	1.492	0.945	1.284	0.775	0.728	0.956	0.743	DNA-(apurinic or apyrimidinic site) endonuclease OS=Mus musculus OX=10090 GN=Apex1 PE=1 SV=2	35.5	55	16	16
Rab21	P35282	1.8443	0.0324006	Up	1.685	0.868	1.495	1.14	0.414	0.867	0.781	0.751	Ras-related protein Rab-21 OS=Mus musculus OX=10090 GN=Rab21 PE=1 SV=4	24.1	15	3	3
Fen1	P39749	1.2742	0.0106235	Up	1.107	1.064	1.1	1.223	0.752	0.861	1.004	0.91	Flap endonuclease 1 OS=Mus musculus OX=10090 GN=Fen1 PE=1 SV=1	42.3	35	12	12
Ina	P46660	1.7811	0.0190629	Up	1.431	1.001	1.605	1.08	1.038	0.619	0.514	0.702	Alpha-internexin OS=Mus musculus OX=10090 GN=Ina PE=1 SV=3	55.3	58	25	21
Cbr1	P48758	1.3604	0.0370561	Up	0.94	1.331	1.014	1.339	0.732	0.846	1.007	0.814	Carbonyl reductase [NADPH] 1 OS=Mus musculus OX=10090 GN=Cbr1 PE=1 SV=3	30.6	63	17	17
Acadl	P51174	1.2918	0.0269736	Up	1.245	1.144	1.184	0.943	0.991	0.841	0.738	0.926	Long-chain specific acyl-CoA dehydrogenase, mitochondrial OS=Mus musculus OX=10090 GN=Acadl PE=1 SV=2	47.9	34	14	14
Tst	P52196	1.7881	0.0325791	Up	0.974	1.705	0.908	1.552	0.59	0.786	0.821	0.677	Thiosulfate sulfurtransferase OS=Mus musculus OX=10090 GN=Tst PE=1 SV=3	33.4	41	10	10
Nudt2	P56380	1.7092	0.00245453	Up	1.277	1.401	1.045	1.331	0.565	0.81	0.815	0.767	Bis(5'-nucleosyl)-tetraphosphatase [asymmetrical] OS=Mus musculus OX=10090 GN=Nudt2 PE=1 SV=3	17	65	8	8
Ywhag	P61982	1.3151	0.000355354	Up	1.181	1.153	1.079	1.14	0.921	0.82	0.908	0.813	14-3-3 protein gamma OS=Mus musculus OX=10090 GN=Ywhag PE=1 SV=2	28.3	83	22	14
Arf6	P62331	1.5777	0.000837438	Up	1.226	1.412	1.066	1.201	0.693	0.748	0.851	0.817	ADP-ribosylation factor 6 OS=Mus musculus OX=10090 GN=Arf6 PE=1 SV=2	20.1	49	7	7
Nxn	P97346	1.2541	0.000928361	Up	1.153	1.138	1.131	1.039	0.859	0.837	0.954	0.907	Nucleoredoxin OS=Mus musculus OX=10090 GN=Nxn PE=1 SV=1	48.3	50	14	14
Rbm15	Q0VBL3	2.1449	0.00645522	Up	1.169	1.751	0.994	1.547	0.485	0.572	0.915	0.574	RNA-binding protein 15 OS=Mus musculus OX=10090 GN=Rbm15 PE=1 SV=1	105.7	35	26	24
Pde12	Q3TIU4	1.5652	0.0107069	Up	0.999	1.305	1.287	1.297	0.859	0.607	0.975	0.682	2',5'-phosphodiesterase 12 OS=Mus musculus OX=10090 GN=Pde12 PE=1 SV=2	67.5	30	12	12
Ccdc51	Q3URS9	2.329	0.00618891	Up	1.084	1.761	1.142	1.612	0.498	0.433	0.948	0.525	Mitochondrial potassium channel OS=Mus musculus OX=10090 GN=Ccdc51 PE=1 SV=1	45.1	18	7	7
Cluh	Q5SW19	1.3101	0.0366291	Up	1.082	1.25	0.974	1.244	0.795	0.758	1.098	0.822	Clustered mitochondria protein homolog OS=Mus musculus OX=10090 GN=Cluh PE=1 SV=2	148	23	24	24
Fam169a	Q5XG69	1.5583	0.0335578	Up	0.953	1.332	1.092	1.505	0.801	0.71	1.057	0.565	Soluble lamin-associated protein of 75 kDa OS=Mus musculus OX=10090 GN=Fam169a PE=1 SV=3	73.2	15	6	6
Spin1	Q61142	1.261	0.0321136	Up	1.218	1.085	1.226	0.94	0.945	0.929	0.749	0.921	Spindlin-1 OS=Mus musculus OX=10090 GN=Spin1 PE=1 SV=2	29.6	42	8	8
Arnt2	Q61324	1.5589	0.0465674	Up	1.168	1.123	1.087	1.506	0.862	0.486	1.117	0.668	Aryl hydrocarbon receptor nuclear translocator 2 OS=Mus musculus OX=10090 GN=Arnt2 PE=1 SV=2	77.9	15	6	6
Zeb1	Q64318	1.2637	0.00457794	Up	1.118	1.152	1.062	1.144	0.956	0.83	0.934	0.822	Zinc finger E-box-binding homeobox 1 OS=Mus musculus OX=10090 GN=Zeb1 PE=1 SV=1	122.4	12	8	8
Nudt16	Q6P3D0	1.762	5.40123e-05	Up	1.239	1.402	1.121	1.346	0.751	0.688	0.762	0.698	U8 snoRNA-decapping enzyme OS=Mus musculus OX=10090 GN=Nudt16 PE=1 SV=1	21.8	39	6	5
Smug1	Q6P5C5	1.306	0.0291733	Up	1.21	1.141	1.059	1.131	1.017	0.738	0.939	0.783	Single-strand selective monofunctional uracil DNA glycosylase OS=Mus musculus OX=10090 GN=Smug1 PE=1 SV=1	30.6	22	4	4
Ube2o	Q6ZPJ3	1.4113	0.00164221	Up	1.192	1.298	0.986	1.215	0.806	0.851	0.871	0.796	(E3-independent) E2 ubiquitin-conjugating enzyme UBE2O OS=Mus musculus OX=10090 GN=Ube2o PE=1 SV=3	140.7	34	35	35
Kifbp	Q6ZPU9	1.226	0.0464844	Up	1.236	0.906	1.196	1.077	0.89	0.954	0.81	0.947	KIF-binding protein OS=Mus musculus OX=10090 GN=Kifbp PE=1 SV=2	71	43	16	16
Dcaf5	Q80T85	1.3122	0.008439	Up	1.029	1.248	1.164	1.107	0.905	0.879	0.953	0.729	DDB1- and CUL4-associated factor 5 OS=Mus musculus OX=10090 GN=Dcaf5 PE=1 SV=2	103.6	7	5	5
Gstm7	Q80W21	1.2592	0.0395698	Up	1.104	0.944	1.173	1.249	0.884	0.75	1.03	0.886	Glutathione S-transferase Mu 7 OS=Mus musculus OX=10090 GN=Gstm7 PE=1 SV=1	25.7	49	10	4
Rraga	Q80X95	1.2533	0.0266901	Up	1.115	1.187	0.977	1.184	0.734	0.971	0.912	0.944	Ras-related GTP-binding protein A OS=Mus musculus OX=10090 GN=Rraga PE=1 SV=1	36.5	29	8	3
Phyhipl	Q8BGT8	1.7458	0.0120553	Up	1.306	1.277	0.984	1.529	0.62	0.609	1.057	0.633	Phytanoyl-CoA hydroxylase-interacting protein-like OS=Mus musculus OX=10090 GN=Phyhipl PE=1 SV=1	42.3	39	12	12
Pck2	Q8BH04	1.9524	0.000455404	Up	1.131	1.676	1.309	1.173	0.699	0.652	0.732	0.626	Phosphoenolpyruvate carboxykinase [GTP], mitochondrial OS=Mus musculus OX=10090 GN=Pck2 PE=1 SV=1	70.5	33	15	15
Fbxo30	Q8BJL1	1.2448	0.0325118	Up	1.177	1.09	1.04	1.142	0.732	0.881	1.069	0.892	F-box only protein 30 OS=Mus musculus OX=10090 GN=Fbxo30 PE=1 SV=2	82.6	20	16	16
Psmd5	Q8BJY1	1.4306	0.00866955	Up	1.153	1.305	1.015	1.245	0.75	0.841	1.002	0.705	26S proteasome non-ATPase regulatory subunit 5 OS=Mus musculus OX=10090 GN=Psmd5 PE=1 SV=4	55.9	47	18	18
Hspbap1	Q8BK58	1.6485	0.00220965	Up	1.169	1.46	1.095	1.261	0.732	0.714	0.93	0.648	HSPB1-associated protein 1 OS=Mus musculus OX=10090 GN=Hspbap1 PE=1 SV=2	54.4	47	14	14
Nceh1	Q8BLF1	1.296	0.0161971	Up	1.14	1.274	1.041	1.072	0.917	0.719	0.886	0.971	Neutral cholesterol ester hydrolase 1 OS=Mus musculus OX=10090 GN=Nceh1 PE=1 SV=1	45.7	6	2	2
Gmppb	Q8BTZ7	1.3108	0.0031324	Up	1.042	1.325	1.124	1.056	0.876	0.853	0.885	0.855	Mannose-1-phosphate guanyltransferase beta OS=Mus musculus OX=10090 GN=Gmppb PE=1 SV=1	39.9	22	6	6
Tor1aip2	Q8BYU6	1.9495	0.000217324	Up	1.091	1.53	1.258	1.41	0.678	0.662	0.753	0.62	Torsin-1A-interacting protein 2 OS=Mus musculus OX=10090 GN=Tor1aip2 PE=1 SV=1	54.5	42	16	15
Prepl	Q8C167	1.2313	0.0141793	Up	1.172	1.08	1.048	1.124	1.049	0.855	0.803	0.886	Prolyl endopeptidase-like OS=Mus musculus OX=10090 GN=Prepl PE=1 SV=1	83.1	31	17	17
Vcpip1	Q8CDG3	1.2924	0.0329492	Up	0.937	1.177	1.126	1.282	0.729	0.982	0.855	0.933	Deubiquitinating protein VCPIP1 OS=Mus musculus OX=10090 GN=Vcpip1 PE=1 SV=1	134.4	24	22	22
Sugp2	Q8CH09	1.427	0.0185888	Up	1.31	1.144	1.179	1.076	0.909	0.862	0.59	0.939	SURP and G-patch domain-containing protein 2 OS=Mus musculus OX=10090 GN=Sugp2 PE=1 SV=2	118	20	16	16
Pgp	Q8CHP8	1.9148	0.00359606	Up	1.079	1.587	1.169	1.425	0.564	0.672	0.922	0.589	Glycerol-3-phosphate phosphatase OS=Mus musculus OX=10090 GN=Pgp PE=1 SV=1	34.5	53	13	13
Bag5	Q8CI32	1.483	0.0111154	Up	1.05	1.494	0.985	1.258	0.834	0.783	0.899	0.712	BAG family molecular chaperone regulator 5 OS=Mus musculus OX=10090 GN=Bag5 PE=1 SV=1	50.9	40	14	14
Kin	Q8K339	1.365	0.00211245	Up	1.324	1.027	1.124	1.151	0.86	0.883	0.868	0.778	DNA/RNA-binding protein KIN17 OS=Mus musculus OX=10090 GN=Kin PE=1 SV=1	44.7	39	13	13
Suox	Q8R086	1.7763	0.0169665	Up	1.057	1.524	1.145	1.395	0.8	0.858	0.429	0.796	Sulfite oxidase, mitochondrial OS=Mus musculus OX=10090 GN=Suox PE=1 SV=2	60.7	16	5	5
Golph3l	Q8R088	1.6242	0.000479894	Up	1.219	1.431	1.113	1.194	0.723	0.767	0.864	0.698	Golgi phosphoprotein 3-like OS=Mus musculus OX=10090 GN=Golph3l PE=1 SV=1	32.9	21	4	4
Arl6ip5	Q8R5J9	1.4536	0.0160891	Up	1.099	1.248	1.154	1.245	0.979	0.739	0.665	0.882	PRA1 family protein 3 OS=Mus musculus OX=10090 GN=Arl6ip5 PE=1 SV=2	21.5	20	4	4
Bles03	Q8VD62	1.502	0.00714383	Up	1.104	1.38	1.106	1.221	0.67	0.796	1.012	0.725	UPF0696 protein C11orf68 homolog OS=Mus musculus OX=10090 GN=Bles03 PE=1 SV=2	31.8	15	4	4
Mrps23	Q8VE22	1.4016	0.00252882	Up	1.064	1.351	1.112	1.15	0.821	0.765	0.939	0.812	28S ribosomal protein S23, mitochondrial OS=Mus musculus OX=10090 GN=Mrps23 PE=1 SV=1	20.3	54	8	8
Gne	Q91WG8	1.9903	4.4314e-05	Up	1.179	1.564	1.334	1.247	0.655	0.649	0.656	0.715	Bifunctional UDP-N-acetylglucosamine 2-epimerase/N-acetylmannosamine kinase OS=Mus musculus OX=10090 GN=Gne PE=1 SV=1	79.1	20	10	10
Bag2	Q91YN9	1.8171	0.00389575	Up	1.391	1.393	1.404	0.969	0.754	0.823	0.533	0.728	BAG family molecular chaperone regulator 2 OS=Mus musculus OX=10090 GN=Bag2 PE=1 SV=1	23.5	58	11	11
Vps16	Q920Q4	1.3173	0.0380742	Up	1.2	1.297	0.901	1.16	0.954	0.809	0.964	0.733	Vacuolar protein sorting-associated protein 16 homolog OS=Mus musculus OX=10090 GN=Vps16 PE=1 SV=3	94.9	13	9	9
Coa7	Q921H9	1.8182	0.00150294	Up	1.31	1.223	1.356	1.271	0.75	0.788	0.504	0.796	Cytochrome c oxidase assembly factor 7 OS=Mus musculus OX=10090 GN=Coa7 PE=1 SV=1	25.6	40	6	6
Klhdc4	Q921I2	1.5239	0.00770276	Up	1.041	1.451	1.005	1.343	0.77	0.721	0.917	0.768	Kelch domain-containing protein 4 OS=Mus musculus OX=10090 GN=Klhdc4 PE=2 SV=2	64.8	34	14	14
Tcaf2	Q921K8	1.3968	0.00833156	Up	1.169	1.264	1.203	1.032	1.019	0.755	0.722	0.846	TRPM8 channel-associated factor 2 OS=Mus musculus OX=10090 GN=Tcaf2 PE=1 SV=1	101.5	5	4	4
Grpel1	Q99LP6	1.2831	0.0389611	Up	1.133	1.029	1.258	1.085	0.805	0.927	0.71	1.069	GrpE protein homolog 1, mitochondrial OS=Mus musculus OX=10090 GN=Grpel1 PE=1 SV=1	24.3	49	10	10
Nudt7	Q99P30	2.109	0.0142703	Up	0.931	1.679	1.006	1.819	0.528	0.537	0.906	0.606	Peroxisomal coenzyme A diphosphatase NUDT7 OS=Mus musculus OX=10090 GN=Nudt7 PE=1 SV=2	26.8	10	2	2
Nanp	Q9CPT3	1.9105	4.18018e-05	Up	1.456	1.319	1.262	1.213	0.714	0.724	0.595	0.715	N-acylneuraminate-9-phosphatase OS=Mus musculus OX=10090 GN=Nanp PE=1 SV=1	27.8	60	10	10
Wdr55	Q9CX97	1.3954	0.0412396	Up	0.984	1.502	1.1	1.083	0.751	0.866	0.69	1.039	WD repeat-containing protein 55 OS=Mus musculus OX=10090 GN=Wdr55 PE=1 SV=2	42.6	19	5	5
Pigk	Q9CXY9	1.6463	0.00125662	Up	1.042	1.389	1.353	1.196	0.813	0.646	0.737	0.829	GPI-anchor transamidase OS=Mus musculus OX=10090 GN=Pigk PE=1 SV=2	44.9	29	9	9
Pgm1	Q9D0F9	1.4238	0.00271117	Up	1.146	1.177	1.117	1.27	0.699	0.795	0.845	0.969	Phosphoglucomutase-1 OS=Mus musculus OX=10090 GN=Pgm1 PE=1 SV=4	61.4	43	23	22
Tubb4a	Q9D6F9	1.4925	0.0110954	Up	1.111	1.319	1.191	1.176	0.878	0.734	0.998	0.604	Tubulin beta-4A chain OS=Mus musculus OX=10090 GN=Tubb4a PE=1 SV=3	49.6	73	29	6
Coasy	Q9DBL7	1.5176	0.0303078	Up	1.065	1.481	0.945	1.341	0.639	0.843	1.021	0.681	Bifunctional coenzyme A synthase OS=Mus musculus OX=10090 GN=Coasy PE=1 SV=2	62	24	10	10
Tor1a	Q9ER39	1.7127	0.026083	Up	1.356	1.183	1.282	1.228	0.759	1.11	0.659	0.42	Torsin-1A OS=Mus musculus OX=10090 GN=Tor1a PE=1 SV=1	37.8	23	7	7
Map3k20	Q9ESL4	2.3241	0.0225454	Up	1.279	1.749	1.166	1.4	0.226	0.656	0.839	0.686	Mitogen-activated protein kinase kinase kinase 20 OS=Mus musculus OX=10090 GN=Map3k20 PE=1 SV=1	91.7	7	4	4
Riox1	Q9JJF3	1.5518	0.0479847	Up	1.147	1.506	0.83	1.396	0.651	0.655	1.062	0.776	Ribosomal oxygenase 1 OS=Mus musculus OX=10090 GN=Riox1 PE=1 SV=2	67.5	28	12	12
Nt5c	Q9JM14	1.5541	0.000309169	Up	1.252	1.326	1.187	1.107	0.885	0.786	0.746	0.718	5'(3')-deoxyribonucleotidase, cytosolic type OS=Mus musculus OX=10090 GN=Nt5c PE=1 SV=1	23.1	39	5	5
Dnajb1	Q9QYJ3	1.2281	0.00257493	Up	1.068	1.12	1.092	1.14	0.957	0.884	0.808	0.95	DnaJ homolog subfamily B member 1 OS=Mus musculus OX=10090 GN=Dnajb1 PE=1 SV=3	38.1	28	8	7
Map1a	Q9QYR6	1.3887	0.00366773	Up	1.103	1.204	1.223	1.129	0.961	0.694	0.829	0.871	Microtubule-associated protein 1A OS=Mus musculus OX=10090 GN=Map1a PE=1 SV=2	300	26	46	43
Rab9a	Q9R0M6	1.711	0.00131356	Up	1.176	1.398	1.165	1.317	0.575	0.728	0.834	0.818	Ras-related protein Rab-9A OS=Mus musculus OX=10090 GN=Rab9a PE=1 SV=1	22.9	54	10	10
Palm	Q9Z0P4	1.2956	0.0395298	Up	1.023	1.08	1.393	1.027	0.778	0.971	0.772	0.97	Paralemmin-1 OS=Mus musculus OX=10090 GN=Palm PE=1 SV=1	41.6	28	9	9
Twf2	Q9Z0P5	1.3054	0.00546924	Up	1.19	1.056	1.171	1.122	1.01	0.763	0.861	0.843	Twinfilin-2 OS=Mus musculus OX=10090 GN=Twf2 PE=1 SV=1	39.4	56	14	11
Keap1	Q9Z2X8	1.4506	0.00512638	Up	1.122	1.378	0.978	1.267	0.831	0.752	0.908	0.78	Kelch-like ECH-associated protein 1 OS=Mus musculus OX=10090 GN=Keap1 PE=1 SV=1	69.5	24	12	12
Uncharacterized protein FLJ45252 homolog--	Q6PIU9	1.288	0.0308217	Up	1.268	1.032	1.17	1.042	0.912	0.828	0.721	1.042	Uncharacterized protein FLJ45252 homolog OS=Mus musculus OX=10090 PE=1 SV=2	37.7	17	4	4
UPF0690 protein C1orf52 homolog--	Q9CWU4	1.3334	0.0118908	Up	1.254	1.124	1.231	0.97	0.766	0.955	0.789	0.924	UPF0690 protein C1orf52 homolog OS=Mus musculus OX=10090 PE=1 SV=1	20.1	11	2	2
MLV-related proviral Env polyprotein--	P10404	1.6475	0.0339936	Up	1.522	1.573	0.848	1.044	0.674	0.611	0.875	0.867	MLV-related proviral Env polyprotein OS=Mus musculus OX=10090 PE=1 SV=3	69.6	13	5	5
Protein C19orf12 homolog--	Q8WUR0	1.5064	0.000118771	Up	1.206	1.282	1.232	1.093	0.861	0.78	0.741	0.813	Protein C19orf12 homolog OS=Mus musculus OX=10090 PE=1 SV=1	15.1	21	3	3
Ythdc1	E9Q5K9	1.696	0.00161525	Up	1.052	1.525	1.19	1.27	0.722	0.666	0.871	0.711	YTH domain-containing protein 1 OS=Mus musculus OX=10090 GN=Ythdc1 PE=1 SV=2	85.6	20	12	12
Ythdf2	Q91YT7	1.206	0.00210096	Up	1.144	1.082	1.07	1.089	0.865	0.916	0.861	0.994	YTH domain-containing family protein 2 OS=Mus musculus OX=10090 GN=Ythdf2 PE=1 SV=1	62.2	31	14	8
Trmt5	Q9D0C4	1.65	0.0160536	Up	0.837	1.549	1.156	1.446	0.739	0.705	0.836	0.743	tRNA (guanine(37)-N1)-methyltransferase OS=Mus musculus OX=10090 GN=Trmt5 PE=1 SV=1	56.8	31	12	12
Septin6	Q9R1T4	1.5825	0.0138211	Up	1.235	1.218	1.043	1.416	0.745	0.589	1.064	0.706	Septin-6 OS=Mus musculus OX=10090 GN=Septin6 PE=1 SV=4	49.6	50	19	6
Tbcc	Q8VCN9	1.3484	0.0057732	Up	0.99	1.225	1.152	1.235	0.974	0.854	0.773	0.812	Tubulin-specific chaperone C OS=Mus musculus OX=10090 GN=Tbcc PE=1 SV=1	38.1	37	9	9
Rufy3	Q9D394	1.2061	0.0275829	Up	1.008	1.01	1.239	1.127	0.987	0.814	0.939	0.895	Protein RUFY3 OS=Mus musculus OX=10090 GN=Rufy3 PE=1 SV=1	53	43	20	19
Trak1	Q6PD31	1.8038	0.0300133	Up	1.086	1.241	0.95	1.88	0.812	0.486	0.623	0.938	Trafficking kinesin-binding protein 1 OS=Mus musculus OX=10090 GN=Trak1 PE=1 SV=1	104.4	8	4	4
Snx30	Q8CE50	1.4925	0.0323169	Up	1.003	1.343	1.044	1.41	0.882	0.674	1.042	0.618	Sorting nexin-30 OS=Mus musculus OX=10090 GN=Snx30 PE=1 SV=1	49.5	7	3	3
Fars2	Q99M01	1.8735	0.000243221	Up	1.453	1.26	1.311	1.19	0.836	0.703	0.618	0.626	Phenylalanine--tRNA ligase, mitochondrial OS=Mus musculus OX=10090 GN=Fars2 PE=1 SV=1	52.3	12	5	5
Tmem11	Q8BK08	1.5805	0.014576	Up	1.046	1.55	0.946	1.367	0.748	0.753	0.921	0.684	Transmembrane protein 11, mitochondrial OS=Mus musculus OX=10090 GN=Tmem11 PE=1 SV=1	21.3	31	5	5
Tmsb10	Q6ZWY8	1.2294	0.0210011	Up	1.05	1.201	1.12	1.05	1.012	0.774	0.956	0.854	Thymosin beta-10 OS=Mus musculus OX=10090 GN=Tmsb10 PE=1 SV=3	5	84	7	7
Tmed1	Q3V009	1.2105	0.0428902	Up	1.021	1.165	0.976	1.232	0.877	0.813	1.035	0.905	Transmembrane emp24 domain-containing protein 1 OS=Mus musculus OX=10090 GN=Tmed1 PE=1 SV=1	25.2	13	4	4
Tssc4	Q9JHE7	3.4823	0.0285011	Up	2.245	0.476	2.137	1.33	0.535	0.5	0.275	0.467	Protein TSSC4 OS=Mus musculus OX=10090 GN=Tssc4 PE=1 SV=1	33.5	15	3	3
Tnks1bp1	P58871	1.3507	0.0151529	Up	1.163	1.04	1.351	1.048	0.867	1.007	0.748	0.785	182 kDa tankyrase-1-binding protein OS=Mus musculus OX=10090 GN=Tnks1bp1 PE=1 SV=2	181.7	23	26	26
Slc39a7	Q31125	1.4658	0.00782884	Up	1.06	1.343	1.261	1.1	0.659	0.754	0.898	0.939	Zinc transporter SLC39A7 OS=Mus musculus OX=10090 GN=Slc39a7 PE=1 SV=2	50.6	7	3	3
Sil1	Q9EPK6	1.5015	0.036558	Up		1.14	1.434	1.141	0.833	1.09	0.736	0.64	Nucleotide exchange factor SIL1 OS=Mus musculus OX=10090 GN=Sil1 PE=1 SV=2	52.4	7	3	3
Tubb2b	Q9CWF2	1.2565	0.0118621	Up	1.1	1.152	0.972	1.243	0.898	0.846	0.98	0.831	Tubulin beta-2B chain OS=Mus musculus OX=10090 GN=Tubb2b PE=1 SV=1	49.9	75	32	2
Ube2q1	Q7TSS2	1.3919	0.0266263	Up		1.228	1.252	1.107	0.992	0.697	0.991	0.756	Ubiquitin-conjugating enzyme E2 Q1 OS=Mus musculus OX=10090 GN=Ube2q1 PE=1 SV=2	46.1	5	2	2
Zcchc8	Q9CYA6	1.3637	0.0251341	Up	1.076	1.314	0.946	1.291	0.887	0.832	0.793	0.881	Zinc finger CCHC domain-containing protein 8 OS=Mus musculus OX=10090 GN=Zcchc8 PE=1 SV=3	78	22	9	9
Txlna	Q6PAM1	1.2548	0.000858675	Up	1.127	1.14	1.061	1.134	0.914	0.91	0.928	0.804	Alpha-taxilin OS=Mus musculus OX=10090 GN=Txlna PE=1 SV=1	62.3	44	24	24
Taf6l	Q8R2K4	1.2941	0.0424006	Up	1.319	1.177	0.979	1.048	0.938	0.732	0.796	1.029	TAF6-like RNA polymerase II p300/CBP-associated factor-associated factor 65 kDa subunit 6L OS=Mus musculus OX=10090 GN=Taf6l PE=1 SV=1	67.2	13	5	5
Ppp1r18	Q8BQ30	1.3248	0.0193362	Up	1.268	1.071	1.231	0.994	0.972	0.924	0.836	0.713	Phostensin OS=Mus musculus OX=10090 GN=Ppp1r18 PE=1 SV=1	65.6	39	15	15
Rpap1	Q80TE0	1.3195	0.0393394	Up	1.121	1.371	0.901	1.17	0.799	0.778	0.997	0.884	RNA polymerase II-associated protein 1 OS=Mus musculus OX=10090 GN=Rpap1 PE=1 SV=2	155.2	20	17	17
Taf7	Q9R1C0	1.5592	0.0329308	Up	1.111	1.403	0.846	1.525	0.939	0.643	0.724	0.827	Transcription initiation factor TFIID subunit 7 OS=Mus musculus OX=10090 GN=Taf7 PE=1 SV=1	39.1	18	5	5
Zhx2	Q8C0C0	1.3344	0.0034319	Up	1.15	1.009	1.128	1.071		0.797		0.836	Zinc fingers and homeoboxes protein 2 OS=Mus musculus OX=10090 GN=Zhx2 PE=1 SV=1	92.2	2	2	2
Sdcbp	O08992	1.5432	0.0099892	Up	1.17	1.128	1.252	1.311	0.553	0.922	0.782	0.893	Syntenin-1 OS=Mus musculus OX=10090 GN=Sdcbp PE=1 SV=1	32.4	29	5	5
Rpusd2	Q149F1	1.3878	0.0232402	Up	1.083	1.187	0.96	1.433	0.702	0.826	0.959	0.873	RNA pseudouridylate synthase domain-containing protein 2 OS=Mus musculus OX=10090 GN=Rpusd2 PE=1 SV=2	61.5	37	14	14
Tpgs1	Q99MS8	1.316	0.00102297	Up	1.1	1.206	1.084	1.166	0.781	0.864	0.946	0.871	Tubulin polyglutamylase complex subunit 1 OS=Mus musculus OX=10090 GN=Tpgs1 PE=1 SV=1	32.6	24	7	7
Rhob	P62746	1.5942	0.00655275	Up	1.191	1.235	1.009	1.491	0.606	0.84	0.872	0.772	Rho-related GTP-binding protein RhoB OS=Mus musculus OX=10090 GN=Rhob PE=1 SV=1	22.1	31	7	5
Syt1	P46096	1.4871	0.0114084	Up	1.219	0.973	1.354	1.241	1.024	0.716	0.706	0.773	Synaptotagmin-1 OS=Mus musculus OX=10090 GN=Syt1 PE=1 SV=1	47.4	9	3	3
Trim3	Q9R1R2	1.9169	0.0491202	Up		1.234	1.664	1.045		0.664	0.926	0.467	Tripartite motif-containing protein 3 OS=Mus musculus OX=10090 GN=Trim3 PE=1 SV=1	80.7	8	5	3
Ripk1	Q60855	2.0777	0.0276059	Up	0.996	1.818	1.042	1.546	0.699	0.607	0.958	0.336	Receptor-interacting serine/threonine-protein kinase 1 OS=Mus musculus OX=10090 GN=Ripk1 PE=1 SV=1	74.8	8	5	5
Uhrf1bp1l	A2RSJ4	1.8507	0.000163618	Up	1.37	1.281	1.407	1.137	0.606	0.68	0.794	0.727	UHRF1-binding protein 1-like OS=Mus musculus OX=10090 GN=Uhrf1bp1l PE=1 SV=2	161.8	2	2	2
Skp2	Q9Z0Z3	1.3922	0.0411861	Up	1.368	1.044	0.991	1.261	0.92	0.885	0.602	0.943	S-phase kinase-associated protein 2 OS=Mus musculus OX=10090 GN=Skp2 PE=1 SV=1	47.7	32	9	8
Ptx3	P48759	1.7058	0.0363625	Up	1.938	1.172	1.107	0.827	0.806	0.703	0.673	0.775	Pentraxin-related protein PTX3 OS=Mus musculus OX=10090 GN=Ptx3 PE=1 SV=2	41.8	18	6	6
Ranbp6	Q8BIV3	1.3644	0.0211071	Up	1.208	1.146	0.996	1.278	0.656	0.897	0.987	0.852	Ran-binding protein 6 OS=Mus musculus OX=10090 GN=Ranbp6 PE=1 SV=3	124.5	12	10	9
Wnt8b	Q9WUD6	1.3163	0.0161243	Up	0.953	1.157	1.2	1.247	0.775	0.793	0.905	0.989	Protein Wnt-8b OS=Mus musculus OX=10090 GN=Wnt8b PE=2 SV=1	38.6	9	3	3
Tprkb	Q8QZZ7	1.2318	0.0256401	Up	1.048	1.193	1.065	1.121	0.861	0.896	0.773	1.064	EKC/KEOPS complex subunit Tprkb OS=Mus musculus OX=10090 GN=Tprkb PE=1 SV=1	19.5	38	4	4
Mboat2	Q8R3I2	1.3162	0.0179189	Up	1.102	1.263	1.107	1.082	0.946	0.837	0.691	0.986	Lysophospholipid acyltransferase 2 OS=Mus musculus OX=10090 GN=Mboat2 PE=1 SV=1	59	10	5	5
Prcp	Q7TMR0	1.3946	0.0144566	Up	1.291	1.323	1.034	1.021	0.769	0.717	0.967	0.895	Lysosomal Pro-X carboxypeptidase OS=Mus musculus OX=10090 GN=Prcp PE=1 SV=2	55	12	4	4
Pex13	Q9D0K1	2.5282	0.00168857	Up	1.44	1.534	1.291	1.464	0.331	0.724	0.541	0.67	Peroxisomal membrane protein PEX13 OS=Mus musculus OX=10090 GN=Pex13 PE=1 SV=1	44.6	19	3	3
Pgpep1	Q9ESW8	1.6444	0.0180898	Up	1.011	1.743	1.016	1.211	0.695	0.799	0.9	0.635	Pyroglutamyl-peptidase 1 OS=Mus musculus OX=10090 GN=Pgpep1 PE=1 SV=1	22.9	38	4	4
Mapk12	O08911	2.1969	0.00784605	Up	1.581	0.992	1.243	1.685	0.42	0.551	0.941	0.592	Mitogen-activated protein kinase 12 OS=Mus musculus OX=10090 GN=Mapk12 PE=1 SV=1	42	11	3	2
Mettl2	Q8BMK1	1.6154	0.0160474	Up	1.085	1.43	1.16	1.273	0.656	0.714	1.109	0.584	tRNA N(3)-methylcytidine methyltransferase METTL2 OS=Mus musculus OX=10090 GN=Mettl2 PE=1 SV=2	43.9	17	5	5
Hsd17b11	Q9EQ06	1.643	0.00917429	Up	1.373	1.483	1.066	1.053	0.776	0.971	0.653	0.628	Estradiol 17-beta-dehydrogenase 11 OS=Mus musculus OX=10090 GN=Hsd17b11 PE=1 SV=1	32.9	29	5	5
Irgq	Q8VIM9	1.2195	0.00631689	Up	1.186	1.149	1.055	1.015	0.979	0.918	0.859	0.856	Immunity-related GTPase family Q protein OS=Mus musculus OX=10090 GN=Irgq PE=1 SV=1	59.3	22	9	9
Ogdh	Q60597	1.2987	0.00405648	Up	1.046	1.223	1.052	1.209	0.897	0.857	0.909	0.825	2-oxoglutarate dehydrogenase, mitochondrial OS=Mus musculus OX=10090 GN=Ogdh PE=1 SV=3	116.4	50	43	43
Trappc3	O55013	1.2399	0.00873989	Up	1.098	1.176	1.115	1.05	0.934	0.88	0.776	0.99	Trafficking protein particle complex subunit 3 OS=Mus musculus OX=10090 GN=Trappc3 PE=1 SV=1	20.3	49	10	10
Tbc1d25	A1A5B6	1.5668	0.0213277	Up	1.187	1.519	0.916	1.271	0.609	0.76	0.993	0.761	TBC1 domain family member 25 OS=Mus musculus OX=10090 GN=Tbc1d25 PE=1 SV=1	82.5	6	3	3
Mpst	Q99J99	1.319	0.0128866	Up	1.043	1.202	1.202	1.114	0.695	0.879	0.974	0.91	3-mercaptopyruvate sulfurtransferase OS=Mus musculus OX=10090 GN=Mpst PE=1 SV=4	33.1	42	8	8
Timm13	P62075	1.5866	0.0106092	Up	1.132	1.494	1.305	0.978	0.76	0.9	0.831	0.603	Mitochondrial import inner membrane translocase subunit Tim13 OS=Mus musculus OX=10090 GN=Timm13 PE=1 SV=1	10.5	35	3	3
Tceal1	Q921P9	1.2813	0.032935	Up	1.133		1.17		0.824	0.982		0.89	Transcription elongation factor A protein-like 1 OS=Mus musculus OX=10090 GN=Tceal1 PE=2 SV=1	19.3	12	2	2
Xpnpep3	B7ZMP1	1.4791	0.0131719	Up	1.043	1.442	0.959	1.338	0.858	0.812	0.698	0.865	Xaa-Pro aminopeptidase 3 OS=Mus musculus OX=10090 GN=Xpnpep3 PE=1 SV=1	56.6	14	5	5
Nhlrc2	Q8BZW8	1.3736	0.0242603	Up	1.041	1.408	1.032	1.159	0.723	0.904	1.004	0.747	NHL repeat-containing protein 2 OS=Mus musculus OX=10090 GN=Nhlrc2 PE=1 SV=1	78.4	24	12	12
Ncl	P09405	1.2339	0.00466724	Up	1.078	1.23	1.014	1.109	0.838	0.888	0.932	0.933	Nucleolin OS=Mus musculus OX=10090 GN=Ncl PE=1 SV=2	76.7	40	36	36
Nagk	Q9QZ08	1.3381	0.0163013	Up	1.149	1.392	1.006	1.04	0.962	0.771	0.826	0.869	N-acetyl-D-glucosamine kinase OS=Mus musculus OX=10090 GN=Nagk PE=1 SV=3	37.2	11	3	3
Mrps2	Q924T2	1.4724	0.00729121	Up	1.139	1.374	0.995	1.267	0.682	0.781	0.942	0.838	28S ribosomal protein S2, mitochondrial OS=Mus musculus OX=10090 GN=Mrps2 PE=1 SV=1	32.3	30	6	6
Rusf1	Q91W34	1.2461	0.0206393	Up	1.275	1.021	0.997	1.157	0.877	0.857	1	0.837	RUS family member 1 OS=Mus musculus OX=10090 GN=Rusf1 PE=1 SV=1	50.4	8	3	3
Scarb2	O35114	1.3717	0.037055	Up	1.224	1.233	1.055	1.123	0.827	0.962	0.591	0.999	Lysosome membrane protein 2 OS=Mus musculus OX=10090 GN=Scarb2 PE=1 SV=3	54	24	10	10
Shq1	Q7TMX5	1.5534	0.0025234	Up	1.366	1.111	1.212	1.181	0.734	0.912	0.849	0.64	Protein SHQ1 homolog OS=Mus musculus OX=10090 GN=Shq1 PE=1 SV=2	63.4	12	4	4
Bpgm	P15327	1.3043	0.0179735	Up	1.263	1.09	0.949	1.237	0.901	0.94	0.756	0.883	Bisphosphoglycerate mutase OS=Mus musculus OX=10090 GN=Bpgm PE=1 SV=2	30	42	10	10
Smyd5	Q3TYX3	1.8158	0.0110072	Up	1.152	1.544	0.873	1.595	0.698	0.845	0.708	0.593	SET and MYND domain-containing protein 5 OS=Mus musculus OX=10090 GN=Smyd5 PE=1 SV=2	47.1	22	6	6
Zcchc3	Q8BPK2	1.9057	0.0179662	Up	0.955	1.808	1.033	1.458	0.564	0.587	0.985	0.621	Zinc finger CCHC domain-containing protein 3 OS=Mus musculus OX=10090 GN=Zcchc3 PE=2 SV=1	43.7	48	14	14
Znf428	Q8C1M2	3.1883	0.0226344	Up	1.933	1.228	1.673	1.246	0.139	0.187	1.378	0.203	Zinc finger protein 428 OS=Mus musculus OX=10090 GN=Znf428 PE=1 SV=1	19	27	2	2
Znf830	Q8R1N0	1.559	0.000365586	Up	1.309	1.228	1.208	1.133	0.674	0.879	0.79	0.786	Zinc finger protein 830 OS=Mus musculus OX=10090 GN=Znf830 PE=1 SV=1	40.6	20	4	4
Znf451	Q8C0P7	1.7722	0.0493711	Up	1.548	1.297	0.954	1.116	0.407	0.799		0.874	E3 SUMO-protein ligase ZNF451 OS=Mus musculus OX=10090 GN=Znf451 PE=1 SV=1	120	6	2	2
Asns	Q61024	1.2081	0.0310011	Up	1.128	1.247	1.035	0.979	0.823	0.887	1.002	0.921	Asparagine synthetase [glutamine-hydrolyzing] OS=Mus musculus OX=10090 GN=Asns PE=1 SV=3	64.2	44	20	20
Abcb10	Q9JI39	1.423	0.00975396	Up	1.16	1.371	0.941	1.238	0.745	0.788	0.844	0.933	ATP-binding cassette sub-family B member 10, mitochondrial OS=Mus musculus OX=10090 GN=Abcb10 PE=1 SV=1	77.1	2	2	2
Gripap1	Q8VD04	1.2349	0.0109859	Up	1.116	1.157	0.987	1.172	0.909	0.853	1.003	0.824	GRIP1-associated protein 1 OS=Mus musculus OX=10090 GN=Gripap1 PE=1 SV=1	92.7	27	15	15
Hmox1	P14901	2.4612	0.0244033	Up	0.908	1.919	1.921	0.925	0.659	0.484	0.601	0.561	Heme oxygenase 1 OS=Mus musculus OX=10090 GN=Hmox1 PE=1 SV=1	32.9	15	3	3
Gde1	Q9JL56	1.97	0.0377969	Up	1.833	1.364	0.783	1.333	0.386	0.828	0.616	0.867	Glycerophosphodiester phosphodiesterase 1 OS=Mus musculus OX=10090 GN=Gde1 PE=1 SV=1	37.6	9	4	4
Slc16a3	P57787	2.6332	0.00798456	Up	0.984	1.252	1.22	2.345	0.539	0.477	0.383	0.804	Monocarboxylate transporter 4 OS=Mus musculus OX=10090 GN=Slc16a3 PE=1 SV=1	50.3	10	4	4
Slc25a15	Q9WVD5	1.5063	0.0139788	Up	1.089	1.278	1.114	1.336	0.764	0.718	1.08	0.636	Mitochondrial ornithine transporter 1 OS=Mus musculus OX=10090 GN=Slc25a15 PE=1 SV=1	32.8	21	5	5
Nt5dc3	Q3UHB1	1.398	0.047372	Up	1.246	1.32	0.822	1.287	0.969	0.741	0.889	0.745	5'-nucleotidase domain-containing protein 3 OS=Mus musculus OX=10090 GN=Nt5dc3 PE=1 SV=1	63.1	9	3	3
Otud7b	B2RUR8	1.5802	0.00477977	Up	1.147	1.377	1.126	1.258	0.737	0.653	1.014	0.702	OTU domain-containing protein 7B OS=Mus musculus OX=10090 GN=Otud7b PE=1 SV=1	91.9	6	3	3
Mdp1	Q9D967	1.6041	0.0245192	Up	1.036	1.651	0.926	1.326	0.681	0.643	0.871	0.884	Magnesium-dependent phosphatase 1 OS=Mus musculus OX=10090 GN=Mdp1 PE=1 SV=1	18.6	43	5	5
Oat	P29758	1.2417	0.0493403	Up	1.049	1.213	0.957	1.225	0.854	0.804	1.078	0.843	Ornithine aminotransferase, mitochondrial OS=Mus musculus OX=10090 GN=Oat PE=1 SV=1	48.3	49	16	16
Fxyd6	Q9D164	1.7465	0.014077	Up	1.241	1.313	1.322	1.215	0.63	0.662	1.132	0.491	FXYD domain-containing ion transport regulator 6 OS=Mus musculus OX=10090 GN=Fxyd6 PE=1 SV=2	10.4	27	2	2
Nck1	Q99M51	1.3009	0.0203817	Up	1.115	1.166	1.191	1.059	0.898	0.959	0.675	0.951	Cytoplasmic protein NCK1 OS=Mus musculus OX=10090 GN=Nck1 PE=1 SV=1	42.9	44	14	12
Mapk7	Q9WVS8	1.3041	0.0372107	Up	1.346	0.978	1.097	1.116	1.013	0.704	0.884	0.878	Mitogen-activated protein kinase 7 OS=Mus musculus OX=10090 GN=Mapk7 PE=1 SV=1	87.7	15	9	9
Msantd3	Q9CR78	1.7339	0.000411808	Up	1.337	1.142	1.334	1.264	0.667	0.721	0.653	0.887	Myb/SANT-like DNA-binding domain-containing protein 3 OS=Mus musculus OX=10090 GN=Msantd3 PE=1 SV=1	32.3	25	5	5
Mrm3	Q5ND52	1.6762	0.0044916	Up		1.384	1.111	1.416	0.76	0.636	0.867	0.848	rRNA methyltransferase 3, mitochondrial OS=Mus musculus OX=10090 GN=Mrm3 PE=2 SV=1	46.8	5	2	2
Ociad1	Q9CRD0	1.245	0.0216824	Up	1.065	1.235	1.052	1.095	0.936	0.851	1.021	0.764	OCIA domain-containing protein 1 OS=Mus musculus OX=10090 GN=Ociad1 PE=1 SV=1	27.6	46	8	8
Naa30	Q8CES0	1.358	0.00075058	Up	1.079	1.272	1.12	1.145	0.921	0.87	0.813	0.795	N-alpha-acetyltransferase 30 OS=Mus musculus OX=10090 GN=Naa30 PE=1 SV=2	39.4	28	7	7
Naa35	Q6PHQ8	1.3078	0.000144745	Up	1.134	1.178	1.128	1.102	0.907	0.898	0.8	0.868	N-alpha-acetyltransferase 35, NatC auxiliary subunit OS=Mus musculus OX=10090 GN=Naa35 PE=1 SV=1	83.3	26	14	14
Kctd6	Q8BNL5	1.9394	0.035973	Up	1.094	2.001	0.849	1.339	0.665	0.702	0.927	0.43	BTB/POZ domain-containing protein KCTD6 OS=Mus musculus OX=10090 GN=Kctd6 PE=2 SV=1	27.6	22	3	3
Mutyh	Q99P21	1.5429	0.00624695	Up	1.068	1.436	1.048	1.308	0.941	0.693	0.811	0.705	Adenine DNA glycosylase OS=Mus musculus OX=10090 GN=Mutyh PE=1 SV=2	57.7	5	2	2
Fam120c	Q8C3F2	1.854	0.0362491	Up	0.893	1.868	0.962	1.483	0.645	0.486	0.93	0.747	Constitutive coactivator of PPAR-gamma-like protein 2 OS=Mus musculus OX=10090 GN=Fam120c PE=1 SV=3	119.6	12	9	7
Ppp2r1b	Q7TNP2	1.2799	0.0282284	Up	1.073	1.273	0.912	1.246	0.802	0.9	0.92	0.897	Serine/threonine-protein phosphatase 2A 65 kDa regulatory subunit A beta isoform OS=Mus musculus OX=10090 GN=Ppp2r1b PE=1 SV=2	65.9	45	22	14
Ntmt1	Q8R2U4	1.4398	6.79905e-05	Up	1.123	1.223	1.174	1.207	0.811	0.888	0.758	0.826	N-terminal Xaa-Pro-Lys N-methyltransferase 1 OS=Mus musculus OX=10090 GN=Ntmt1 PE=1 SV=3	25.4	49	8	8
Asrgl1	Q8C0M9	1.3343	0.0368423	Up	1.057	1.236	0.951	1.342	0.814	0.733	1.048	0.842	Isoaspartyl peptidase/L-asparaginase OS=Mus musculus OX=10090 GN=Asrgl1 PE=1 SV=1	33.9	18	5	5
Dmac1	Q9CQ00	1.6681	0.00539557	Up	0.974	1.406	1.334	1.292	0.804	0.594	0.897	0.706	Distal membrane-arm assembly complex protein 1 OS=Mus musculus OX=10090 GN=Dmac1 PE=1 SV=1	11.3	18	2	2
Ppm1g	Q61074	1.2819	0.00192738	Up	1.196	1.107	1.056	1.147	0.8	0.843	0.948	0.924	Protein phosphatase 1G OS=Mus musculus OX=10090 GN=Ppm1g PE=1 SV=3	58.7	54	21	21
Naf1	Q3UMQ8	1.7978	0.0391469	Up	1.298	1.368	1.13	1.353	0.465	0.536	1.394	0.469	H/ACA ribonucleoprotein complex non-core subunit NAF1 OS=Mus musculus OX=10090 GN=Naf1 PE=1 SV=2	53.2	5	2	2
Nudt19	P11930	1.5942	0.0320279	Up	0.973	1.64	1.011	1.302	0.61	0.71	1.046	0.724	Nucleoside diphosphate-linked moiety X motif 19 OS=Mus musculus OX=10090 GN=Nudt19 PE=1 SV=2	40.3	11	2	2
Gpx1	P11352	1.3731	0.0373791	Up	1.286	1.307	0.89	1.158	0.725	0.786	1.044	0.825	Glutathione peroxidase 1 OS=Mus musculus OX=10090 GN=Gpx1 PE=1 SV=2	22.3	66	9	9
Aldh18a1	Q9Z110	1.4012	0.00734336	Up	1.125	1.274	1.057	1.224	0.695	0.781	0.988	0.876	Delta-1-pyrroline-5-carboxylate synthase OS=Mus musculus OX=10090 GN=Aldh18a1 PE=1 SV=2	87.2	45	34	34
Efnb1	P52795	1.4294	0.0439313	Up	1.265	1.303	0.859	1.293	0.628	0.785	0.954	0.935	Ephrin-B1 OS=Mus musculus OX=10090 GN=Efnb1 PE=1 SV=1	37.8	48	11	8
Egln1	Q91YE3	2.635	0.00312425	Up	1.812	1.07	1.639	1.268	0.663	0.323	0.557	0.654	Egl nine homolog 1 OS=Mus musculus OX=10090 GN=Egln1 PE=1 SV=2	43.1	12	5	5
Pcbp4	P57724	1.2739	0.000571487	Up	1.14	1.14	1.096	1.117	0.803	0.867	0.909	0.948	Poly(rC)-binding protein 4 OS=Mus musculus OX=10090 GN=Pcbp4 PE=1 SV=1	41.4	32	7	7
Pepd	Q11136	1.227	0.0307531	Up	1.006	1.223	1.018	1.174	0.78	0.886	1.008	0.929	Xaa-Pro dipeptidase OS=Mus musculus OX=10090 GN=Pepd PE=1 SV=3	55	44	17	17
Nadk	P58058	1.5671	0.000846732	Up	1.324	1.301	1.065	1.201	0.669	0.789	0.864	0.799	NAD kinase OS=Mus musculus OX=10090 GN=Nadk PE=1 SV=2	48.6	9	3	3
Mettl16	Q9CQG2	1.3589	0.00108269	Up	1.22	1.151	1.073	1.175	0.827	0.82	0.966	0.786	RNA N6-adenosine-methyltransferase METTL16 OS=Mus musculus OX=10090 GN=Mettl16 PE=1 SV=1	62.3	38	15	15
Mrps28	Q9CY16	1.3282	0.0121798	Up	1.034	1.325	1.127	1.087	0.932	0.841	0.728	0.942	28S ribosomal protein S28, mitochondrial OS=Mus musculus OX=10090 GN=Mrps28 PE=1 SV=1	20.5	33	5	5
Pdia4	P08003	1.2296	0.000862815	Up	1.064	1.175	1.076	1.109	0.9	0.84	0.95	0.908	Protein disulfide-isomerase A4 OS=Mus musculus OX=10090 GN=Pdia4 PE=1 SV=3	71.9	53	36	36
Pcgf2	P23798	1.2033	0.0128702	Up	1.068	1.191	1.065	1.056	0.887	0.951	0.994	0.808	Polycomb group RING finger protein 2 OS=Mus musculus OX=10090 GN=Pcgf2 PE=1 SV=2	37.7	15	3	3
Npepl1	Q6NSR8	1.2516	0.0058633	Up	1.002	1.154	1.105	1.196	0.866	0.985	0.887	0.823	Probable aminopeptidase NPEPL1 OS=Mus musculus OX=10090 GN=Npepl1 PE=1 SV=1	55.9	23	9	9
Nqo2	Q9JI75	1.7065	0.00222909	Up	1.085	1.459	1.07	1.253		0.664	0.759	0.716	Ribosyldihydronicotinamide dehydrogenase [quinone] OS=Mus musculus OX=10090 GN=Nqo2 PE=1 SV=3	26.2	21	3	3
Notch2	O35516	2.3092	0.0031911	Up		1.652		1.39	0.64	0.606	0.73		Neurogenic locus notch homolog protein 2 OS=Mus musculus OX=10090 GN=Notch2 PE=1 SV=2	265.5	2	2	2
Pigs	Q6PD26	2.2986	0.0318292	Up	0.974	1.957	0.961	1.689	0.435	0.45	1.181	0.362	GPI transamidase component PIG-S OS=Mus musculus OX=10090 GN=Pigs PE=1 SV=3	61.7	24	10	10
Ppil4	Q9CXG3	1.4156	0.0295866	Up	1.101	1.286	1.269	1.041	0.841	0.581	0.976	0.92	Peptidyl-prolyl cis-trans isomerase-like 4 OS=Mus musculus OX=10090 GN=Ppil4 PE=1 SV=2	57.2	36	16	16
Mmp14	P53690	1.7002	0.03149	Up	0.952	1.674	0.971	1.444	0.921	0.817	0.702	0.525	Matrix metalloproteinase-14 OS=Mus musculus OX=10090 GN=Mmp14 PE=2 SV=3	65.9	4	3	2
Paox	Q8C0L6	1.5231	0.0355214	Up	0.877	1.489	1.031	1.442	0.822	0.67	0.952	0.733	Peroxisomal N(1)-acetyl-spermine/spermidine oxidase OS=Mus musculus OX=10090 GN=Paox PE=1 SV=3	55.4	15	6	6
Pgghg	Q8BP56	1.8018	0.0407611	Up	1.4	1.522	0.875	1.358	0.373	0.788	0.954	0.746	Protein-glucosylgalactosylhydroxylysine glucosidase OS=Mus musculus OX=10090 GN=Pgghg PE=1 SV=1	76.4	8	5	5
Ric8a	Q3TIR3	1.3132	0.0247148	Up	1.186	1.07	0.991	1.306	0.938	0.79	0.997	0.742	Synembryn-A OS=Mus musculus OX=10090 GN=Ric8a PE=1 SV=2	59.8	24	10	9
Pigt	Q8BXQ2	1.4535	0.0106972	Up	0.993	1.295	1.051	1.411	0.733	0.782	0.955	0.798	GPI transamidase component PIG-T OS=Mus musculus OX=10090 GN=Pigt PE=1 SV=2	65.7	23	12	12
Pask	Q8CEE6	1.2947	0.0352745	Up	1.092	1.306	0.919	1.208	0.854	0.869	1.005	0.767	PAS domain-containing serine/threonine-protein kinase OS=Mus musculus OX=10090 GN=Pask PE=1 SV=3	151.2	25	22	22
Prune1	Q8BIW1	1.2289	0.016181	Up	1.154	1.135	1.094	1.036	1.03	0.917	0.775	0.874	Exopolyphosphatase PRUNE1 OS=Mus musculus OX=10090 GN=Prune1 PE=1 SV=1	50.2	35	11	11
Tmem132c	Q8CEF9	1.9472	0.0343398	Up	1.247	1.747	1.604	0.679	0.7	0.795	0.568	0.647	Transmembrane protein 132C OS=Mus musculus OX=10090 GN=Tmem132c PE=2 SV=3	121.3	1	2	2
Sarm1	Q6PDS3	1.3495	0.0166172	Up	1.02	1.291	1.002	1.293	0.818	0.939	0.88	0.776	NAD(+) hydrolase SARM1 OS=Mus musculus OX=10090 GN=Sarm1 PE=1 SV=1	79.6	23	14	14
Bax	Q07813	1.3421	0.0248163	Up	1.195	1.215	1.049	1.135	0.632	0.956	0.936	0.899	Apoptosis regulator BAX OS=Mus musculus OX=10090 GN=Bax PE=1 SV=1	21.4	35	6	6
Grcc10	O35127	1.2596	0.04789	Up	1.054	1.284	0.957	1.178	0.8	0.783	1.049	0.919	Protein C10 OS=Mus musculus OX=10090 GN=Grcc10 PE=1 SV=1	13.2	40	3	3
Aif1l	Q9EQX4	1.3818	0.0344523	Up	1.279	1.121	1.156	1.091	1	0.841	0.939	0.583	Allograft inflammatory factor 1-like OS=Mus musculus OX=10090 GN=Aif1l PE=1 SV=1	17	51	8	8
Basp1	Q91XV3	1.4558	0.0183264	Up	1.031	1.287	1.372	1.056	1.021	0.66	0.85	0.729	Brain acid soluble protein 1 OS=Mus musculus OX=10090 GN=Basp1 PE=1 SV=3	22.1	91	19	19
Ccdc127	Q3TC33	1.8491	0.00198929	Up	1.293	1.433	1.137	1.333	0.619	0.643	0.957	0.591	Coiled-coil domain-containing protein 127 OS=Mus musculus OX=10090 GN=Ccdc127 PE=1 SV=2	30.5	14	3	3
Cpd	O89001	1.3286	0.0422592	Up	1.192	1.049	1.234	1.098	0.992	0.621	0.838	0.991	Carboxypeptidase D OS=Mus musculus OX=10090 GN=Cpd PE=1 SV=2	152.3	15	16	16
Camlg	P49070	1.3503	0.0490535	Up	1.369	1.104	1.024	1.109	0.684	1.01	0.699	1.018	Calcium signal-modulating cyclophilin ligand OS=Mus musculus OX=10090 GN=Camlg PE=1 SV=2	32.5	35	6	6
Als2	Q920R0	1.268	0.0257396	Up	1.002	1.262	1.024	1.197	0.814	0.807	1.032	0.884	Alsin OS=Mus musculus OX=10090 GN=Als2 PE=1 SV=3	182.5	8	10	10
Bet1l	O35153	1.939	0.00679499	Up	1.077	1.543	1.241	1.419	0.743	0.599	0.924	0.457	BET1-like protein OS=Mus musculus OX=10090 GN=Bet1l PE=3 SV=1	12.4	29	2	2
Aak1	Q3UHJ0	1.392	0.0217375	Up	1.016	1.352	1.067	1.231	0.784	0.686	1.042	0.84	AP2-associated protein kinase 1 OS=Mus musculus OX=10090 GN=Aak1 PE=1 SV=2	103.3	35	19	18
Hspa12b	Q9CZJ2	2.0064	0.0161649	Up	1.15	1.918	0.869	1.406	0.758	0.498	0.826	0.581	Heat shock 70 kDa protein 12B OS=Mus musculus OX=10090 GN=Hspa12b PE=1 SV=1	76.1	30	15	14
Itgav	P43406	1.8313	0.0316771	Up	1.009	2	1.138	1.03	0.466	0.802	0.85	0.709	Integrin alpha-V OS=Mus musculus OX=10090 GN=Itgav PE=1 SV=2	115.3	10	9	9
Efnb3	O35393	1.7545	0.0239386	Up	0.986	1.836	1.322	0.951	0.853	0.66	0.819	0.572	Ephrin-B3 OS=Mus musculus OX=10090 GN=Efnb3 PE=1 SV=1	35.9	11	3	2
Gatm	Q9D964	1.3909	0.00501324	Up	1.337	1.246	1.102	0.976	0.799	0.882	0.793	0.877	Glycine amidinotransferase, mitochondrial OS=Mus musculus OX=10090 GN=Gatm PE=1 SV=1	48.3	19	5	5
Dipk1b	Q99ML4	1.3691	0.000697652	Up	1.189	1.232	1.066	1.146	0.814	0.855	0.934	0.781	Divergent protein kinase domain 1B OS=Mus musculus OX=10090 GN=Dipk1b PE=1 SV=1	48.8	7	2	2
Pgd	Q9DCD0	1.2607	0.0061205	Up	1.035	1.266	1.025	1.147	0.894	0.861	0.946	0.847	6-phosphogluconate dehydrogenase, decarboxylating OS=Mus musculus OX=10090 GN=Pgd PE=1 SV=3	53.2	63	26	26
Chsy1	Q6ZQ11	1.4317	0.0493668	Up	0.95	1.125	1.248	1.396	0.566	1.042	0.836	0.852	Chondroitin sulfate synthase 1 OS=Mus musculus OX=10090 GN=Chsy1 PE=2 SV=2	91.3	4	2	2
Coil	Q5SU73	1.4785	0.0093323	Up	1.005	1.501	1.018	1.256	0.863	0.795	0.745	0.83	Coilin OS=Mus musculus OX=10090 GN=Coil PE=1 SV=1	61.9	15	5	5
Dnajb4	Q9D832	2.0105	4.98179e-05	Up	1.432	1.35	1.368	1.188	0.751	0.693	0.584	0.627	DnaJ homolog subfamily B member 4 OS=Mus musculus OX=10090 GN=Dnajb4 PE=1 SV=1	37.8	24	7	6
Bcar1	Q61140	1.3861	0.0174069	Up	1.286	1.212	0.977	1.181	0.925	0.695	0.986	0.753	Breast cancer anti-estrogen resistance protein 1 OS=Mus musculus OX=10090 GN=Bcar1 PE=1 SV=2	94.2	26	14	13
Commd10	Q8JZY2	1.2499	0.0129868	Up	1.222	1.076	1.194	0.96	0.953	0.89	0.822	0.897	COMM domain-containing protein 10 OS=Mus musculus OX=10090 GN=Commd10 PE=1 SV=1	22.8	10	2	2
Adprh	P54923	1.279	0.00550795	Up	1.056	1.253	1.017	1.176	0.85	0.836	0.964	0.87	[Protein ADP-ribosylarginine] hydrolase OS=Mus musculus OX=10090 GN=Adprh PE=1 SV=1	40	60	17	17
Akap13	E9Q394	1.4125	0.00410785	Up	1.191	1.22	1.111	1.169	0.914	0.776	0.895	0.736	A-kinase anchor protein 13 OS=Mus musculus OX=10090 GN=Akap13 PE=1 SV=1	303.8	5	7	7
Flot2	Q60634	1.2242	0.00319928	Up	1.167	1.131	1.06	1.054	0.908	0.979	0.891	0.826	Flotillin-2 OS=Mus musculus OX=10090 GN=Flot2 PE=1 SV=2	47	36	13	13
Erf	P70459	1.3378	0.0125873	Up	1.279	1.004	1.059	1.248	0.779	0.768	0.939	0.945	ETS domain-containing transcription factor ERF OS=Mus musculus OX=10090 GN=Erf PE=1 SV=1	59	14	4	4
Slc25a4	P48962	1.2487	0.0282751	Up	1.006	1.225	1.031	1.192	0.947	0.842	1.007	0.771	ADP/ATP translocase 1 OS=Mus musculus OX=10090 GN=Slc25a4 PE=1 SV=4	32.9	57	20	8
Clpp	O88696	1.3339	0.0141188	Up	1.08	1.115	1.113	1.274	0.86	0.772	1.056	0.747	ATP-dependent Clp protease proteolytic subunit, mitochondrial OS=Mus musculus OX=10090 GN=Clpp PE=1 SV=1	29.8	28	6	6
Cblb	Q3TTA7	1.6223	0.0157628	Up	1.335	1.48	1.09	1.048	0.849	0.664	0.979	0.561	E3 ubiquitin-protein ligase CBL-B OS=Mus musculus OX=10090 GN=Cblb PE=1 SV=3	109	8	7	4
Ikzf5	Q8BU00	1.4076	0.00621748	Up	1.338	1.087	1.18	1.078	0.962	0.821	0.695	0.849	Zinc finger protein Pegasus OS=Mus musculus OX=10090 GN=Ikzf5 PE=2 SV=1	46.4	4	2	2
Ifi30	Q9ESY9	1.4802	0.0144091	Up	1.137	1.367	1.376	0.898	0.755	0.883	0.724	0.866	Gamma-interferon-inducible lysosomal thiol reductase OS=Mus musculus OX=10090 GN=Ifi30 PE=1 SV=3	27.8	16	2	2
Mettl6	Q8BVH9	1.3314	0.0305432	Up	1.125	1.223	0.942	1.29	0.823	0.82	1.057	0.74	tRNA N(3)-methylcytidine methyltransferase METTL6 OS=Mus musculus OX=10090 GN=Mettl6 PE=1 SV=2	32.8	12	4	4
Iglon5	Q8HW98	1.2172	0.00530396	Up	1.108	1.119	1.025	1.152	0.928	0.839	0.995	0.856	IgLON family member 5 OS=Mus musculus OX=10090 GN=Iglon5 PE=2 SV=2	36.7	18	4	4
Gprc5b	Q923Z0	2.0971	0.0020721	Up	1.526	1.5	0.909	1.484	0.631	0.727	0.546	0.68	G-protein coupled receptor family C group 5 member B OS=Mus musculus OX=10090 GN=Gprc5b PE=1 SV=1	45.9	7	2	2
Lsm10	Q8QZX5	2.154	0.0117099	Up	1.152	1.909	0.841	1.567	0.507	0.668	0.802	0.562	U7 snRNA-associated Sm-like protein LSm10 OS=Mus musculus OX=10090 GN=Lsm10 PE=1 SV=1	13.9	31	2	2
Lamp2	P17047	1.8211	0.0076944	Up	1.079	1.658	0.979	1.456	0.671	0.577	0.86	0.732	Lysosome-associated membrane glycoprotein 2 OS=Mus musculus OX=10090 GN=Lamp2 PE=1 SV=2	45.7	9	4	4
Ggct	Q9D7X8	1.4027	0.00245717	Up	1.265	1.121	1.085	1.207	0.85	0.934	0.705	0.846	Gamma-glutamylcyclotransferase OS=Mus musculus OX=10090 GN=Ggct PE=1 SV=1	21.2	19	2	2
H1-3	P43277	1.2817	0.0033109	Up	1.069	1.232	1.138	1.065	0.841	0.82	0.869	0.984	Histone H1.3 OS=Mus musculus OX=10090 GN=H1-3 PE=1 SV=2	22.1	47	15	2
Colgalt1	Q8K297	1.2534	0.023119	Up	1.096	1.305	0.988	1.073	0.832	0.854	1.014	0.86	Procollagen galactosyltransferase 1 OS=Mus musculus OX=10090 GN=Colgalt1 PE=1 SV=2	71	24	12	12
Lemd2	Q6DVA0	1.2905	0.00633251	Up	1.229	1.086	1.088	1.115	0.758	0.877	0.996	0.87	LEM domain-containing protein 2 OS=Mus musculus OX=10090 GN=Lemd2 PE=1 SV=1	57.5	15	7	7
Msantd2	Q6NZR2	1.4044	0.00103157	Up	1.263	1.141	1.102	1.175	0.717	0.896	0.853	0.867	Myb/SANT-like DNA-binding domain-containing protein 2 OS=Mus musculus OX=10090 GN=Msantd2 PE=1 SV=1	61.3	16	7	7
Lclat1	Q3UN02	1.4898	0.0144754	Up	1.011	1.425	1.038	1.323	0.728	0.828	0.837	0.827	Lysocardiolipin acyltransferase 1 OS=Mus musculus OX=10090 GN=Lclat1 PE=1 SV=2	44.4	9	3	3
Gstm1	P10649	1.3032	0.0138597	Up	1.036	1.148	1.186	1.165	0.953	0.817	0.989	0.721	Glutathione S-transferase Mu 1 OS=Mus musculus OX=10090 GN=Gstm1 PE=1 SV=2	26	50	10	6
Gipc1	Q9Z0G0	1.2405	0.0280968	Up	0.913	1.184	1.089	1.255	0.891	0.861	0.952	0.876	PDZ domain-containing protein GIPC1 OS=Mus musculus OX=10090 GN=Gipc1 PE=1 SV=1	36.1	43	11	11
Iws1	Q8C1D8	1.2002	0.00873619	Up	1.014	1.099	1.103	1.16	0.897	0.829	1.003	0.917	Protein IWS1 homolog OS=Mus musculus OX=10090 GN=Iws1 PE=1 SV=1	85.2	16	10	10
Lancl2	Q9JJK2	1.3108	0.000323769	Up	1.091	1.216	1.079	1.161	0.91	0.837	0.895	0.827	LanC-like protein 2 OS=Mus musculus OX=10090 GN=Lancl2 PE=1 SV=1	50.7	34	14	14
Ftl1	P29391	1.6237	0.0231836	Up	1.259	1.333	0.797	1.573	0.687	0.834	0.748	0.787	Ferritin light chain 1 OS=Mus musculus OX=10090 GN=Ftl1 PE=1 SV=2	20.8	49	9	9
Hyal2	O35632	1.2712	0.00238615	Up	1.068	1.232	1.158	1.028	0.944	0.882	0.846	0.857	Hyaluronidase-2 OS=Mus musculus OX=10090 GN=Hyal2 PE=1 SV=2	53.6	10	3	3
Engase	Q8BX80	1.4638	0.0275735	Up	0.895	1.237	1.489	1.135	0.755	1.005	0.739	0.75	Cytosolic endo-beta-N-acetylglucosaminidase OS=Mus musculus OX=10090 GN=Engase PE=1 SV=1	82.9	7	4	4
Enc1	O35709	1.5003	0.0179279	Up	1.042	1.329	0.942	1.497	0.878	0.784	0.864	0.68	Ectoderm-neural cortex protein 1 OS=Mus musculus OX=10090 GN=Enc1 PE=2 SV=2	66.1	21	10	10
Gna13	P27601	1.8036	0.00329842	Up	1.199	1.571	1.001	1.382	0.61	0.682	0.882	0.683	Guanine nucleotide-binding protein subunit alpha-13 OS=Mus musculus OX=10090 GN=Gna13 PE=1 SV=1	44	45	15	14
Gnpda1	O88958	1.2179	0.0369723	Up	1.095	1.301	0.97	1.039	0.813	0.939	0.952	0.913	Glucosamine-6-phosphate isomerase 1 OS=Mus musculus OX=10090 GN=Gnpda1 PE=1 SV=3	32.5	62	11	10
Chd5	A2A8L1	2.3544	0.0160446	Up	1.125	1.54	1.32	1.628	0.696	0.382	0.901	0.405	Chromodomain-helicase-DNA-binding protein 5 OS=Mus musculus OX=10090 GN=Chd5 PE=1 SV=1	222.4	13	21	4
Arl8b	Q9CQW2	1.2155	0.0121297	Up	1.062	1.204	0.982	1.152	0.954	0.875	0.949	0.842	ADP-ribosylation factor-like protein 8B OS=Mus musculus OX=10090 GN=Arl8b PE=1 SV=1	21.5	57	10	5
Ehd1	Q9WVK4	1.3702	0.00624803	Up	1.056	1.294	1.051	1.233	0.812	0.856	0.969	0.745	EH domain-containing protein 1 OS=Mus musculus OX=10090 GN=Ehd1 PE=1 SV=1	60.6	72	35	25
Arpc1b	Q9WV32	1.3054	0.0417977	Up	0.972	1.409	1.043	1.115	0.852	0.917	0.976	0.732	Actin-related protein 2/3 complex subunit 1B OS=Mus musculus OX=10090 GN=Arpc1b PE=1 SV=4	41	39	12	11
Ehd3	Q9QXY6	1.2385	0.046269	Up	1.266	1.151	1.015	1.003	1.005	0.964	0.748	0.864	EH domain-containing protein 3 OS=Mus musculus OX=10090 GN=Ehd3 PE=1 SV=2	60.8	45	19	7
Hs1bp3	Q3TC93	1.3852	0.0197679	Up	1.059	1.198	1.125	1.271	0.969	0.902	0.619	0.869	HCLS1-binding protein 3 OS=Mus musculus OX=10090 GN=Hs1bp3 PE=1 SV=2	43.7	23	6	6
Ddx24	Q9ESV0	1.2713	0.00236858	Up	1.138	1.181	0.999	1.171	0.859	0.833	0.945	0.894	ATP-dependent RNA helicase DDX24 OS=Mus musculus OX=10090 GN=Ddx24 PE=1 SV=2	96.4	24	16	16
Cpe	Q00493	1.2352	0.0303708	Up	1.096	0.999	1.163	1.174	0.966	0.773	1.028	0.821	Carboxypeptidase E OS=Mus musculus OX=10090 GN=Cpe PE=1 SV=2	53.2	33	11	11
Cdk9	Q99J95	1.2984	0.00161728	Up	1.181	1.19	1.067	1.092	0.775	0.908	0.923	0.883	Cyclin-dependent kinase 9 OS=Mus musculus OX=10090 GN=Cdk9 PE=1 SV=1	42.7	43	14	12
Acsl6	Q91WC3	1.259	0.0367872	Up	1.075	1.02	1.305	1.067	0.962	0.757	1.01	0.819	Long-chain-fatty-acid--CoA ligase 6 OS=Mus musculus OX=10090 GN=Acsl6 PE=1 SV=1	78	10	6	5
Cnnm3	Q32NY4	1.2577	0.0325593	Up	1.122	1.141	1.146	1.056	0.994	0.705	0.84	1.011	Metal transporter CNNM3 OS=Mus musculus OX=10090 GN=Cnnm3 PE=1 SV=2	76.2	7	6	6
Ccnd1	P25322	1.6402	0.0486861	Up	1.112	1.423	0.907	1.541	0.621	0.533	1.187	0.697	G1/S-specific cyclin-D1 OS=Mus musculus OX=10090 GN=Ccnd1 PE=1 SV=1	33.4	14	3	2
Specc1	Q5SXY1	1.3514	0.00262876	Up	1.303	1.016	1.106	1.182	0.78	0.88	0.86	0.889	Cytospin-B OS=Mus musculus OX=10090 GN=Specc1 PE=1 SV=2	118	10	8	8
Ccsmst1	Q6RUT7	1.2445	0.0103891	Up	1.21	1.053	1.113	1.068	0.996	0.945	0.816	0.814	Protein CCSMST1 OS=Mus musculus OX=10090 GN=Ccsmst1 PE=1 SV=1	15.3	38	2	2
F13a1	Q8BH61	1.3173	0.0364604	Up	1.11	1.32	1.155	0.969	1.083	0.784	0.745	0.845	Coagulation factor XIII A chain OS=Mus musculus OX=10090 GN=F13a1 PE=1 SV=3	83.2	17	10	10
Anxa5	P48036	1.4298	0.0327512	Up	1.104	1.451	1.038	1.121	0.991	0.742	0.946	0.618	Annexin A5 OS=Mus musculus OX=10090 GN=Anxa5 PE=1 SV=1	35.7	60	20	20
Cdca5	Q9CPY3	1.5212	0.00675938	Up	1.509	1.045	1.191	1.088	0.727	0.876	0.696	0.878	Sororin OS=Mus musculus OX=10090 GN=Cdca5 PE=1 SV=1	29	19	3	3
Ahsa2	Q8N9S3	1.2051	0.00306077	Up	1.097	1.184	1.041	1.061	0.864	0.929	0.969	0.875	Activator of 90 kDa heat shock protein ATPase homolog 2 OS=Mus musculus OX=10090 GN=Ahsa2 PE=1 SV=2	37.6	37	10	9
Diexf	Q8BTT6	1.2318	0.0127382	Up	1.051	1.169	1.042	1.165	0.851	0.902	1.029	0.812	Digestive organ expansion factor homolog OS=Mus musculus OX=10090 GN=Diexf PE=2 SV=2	88.8	25	16	16
Fkbpl	O35450	1.6862	0.0256264	Up	1.571	0.969	1.165	1.14		0.896	0.55	0.709	FK506-binding protein-like OS=Mus musculus OX=10090 GN=Fkbpl PE=2 SV=1	38.3	11	2	2
Gmeb2	P58929	1.279	0.0277744	Up	1.206	1.121	1.128	1.042	0.898	1.071	0.828	0.719	Glucocorticoid modulatory element-binding protein 2 OS=Mus musculus OX=10090 GN=Gmeb2 PE=2 SV=2	56.6	14	7	5
Dhrs13	Q5SS80	1.7391	0.0431006	Up	0.843	1.902	1.091	1.249	0.742	0.615	0.986	0.581	Dehydrogenase/reductase SDR family member 13 OS=Mus musculus OX=10090 GN=Dhrs13 PE=1 SV=1	40.7	25	8	8
Arrb1	Q8BWG8	1.889	0.0316163	Up	1.052	1.838	1.491	0.842	0.709	0.97	0.548	0.538	Beta-arrestin-1 OS=Mus musculus OX=10090 GN=Arrb1 PE=1 SV=1	46.9	14	5	5
Glb1	P23780	1.9226	0.0180825	Up	1.06	1.9	0.937	1.371	0.628	0.654	0.936	0.522	Beta-galactosidase OS=Mus musculus OX=10090 GN=Glb1 PE=1 SV=1	73.1	21	10	10
D17h6s53e	Q9Z1R4	2.1864	0.0412405	Up	0.972	0.875	2.038	1.594	0.389	1.161	0.44	0.516	Uncharacterized protein C6orf47 homolog OS=Mus musculus OX=10090 GN=D17h6s53e PE=1 SV=1	32	9	2	2
Cnp	P16330	2.1958	0.0112911	Up	0.937	1.63	1.176	1.136			0.551	0.56	2',3'-cyclic-nucleotide 3'-phosphodiesterase OS=Mus musculus OX=10090 GN=Cnp PE=1 SV=3	47.1	5	2	2
Ano8	Q6PB70	1.6074	0.0161113	Up	1.16	1.41	0.964	1.407	0.854	0.562	0.941	0.717	Anoctamin-8 OS=Mus musculus OX=10090 GN=Ano8 PE=1 SV=3	119	2	2	2
Armt1	A6H630	1.5427	0.00769486	Up	1.181	1.308	0.928	1.447	0.784	0.711	0.903	0.755	Damage-control phosphatase ARMT1 OS=Mus musculus OX=10090 GN=Armt1 PE=1 SV=1	50.5	35	11	11
Cyhr1	Q9QXA1	1.7195	0.0227356	Up	1.337	1.286	1.093	1.348	0.854	0.404	0.813	0.874	Cysteine and histidine-rich protein 1 OS=Mus musculus OX=10090 GN=Cyhr1 PE=1 SV=1	35.7	31	7	7
Cap2	Q9CYT6	1.2278	0.00944848	Up	1.144	1.201	1.095	0.98	0.854	0.876	0.989	0.881	Adenylyl cyclase-associated protein 2 OS=Mus musculus OX=10090 GN=Cap2 PE=1 SV=1	52.8	28	10	8
Cdk16	Q04735	1.2677	0.0164296	Up	1.062	1.198	0.981	1.244	0.825	0.821	1	0.892	Cyclin-dependent kinase 16 OS=Mus musculus OX=10090 GN=Cdk16 PE=1 SV=1	55.9	19	9	3
Creld2	Q9CYA0	1.3265	0.00471409	Up	1.015	1.324	1.064	1.168	0.825	0.911	0.884	0.826	Protein disulfide isomerase Creld2 OS=Mus musculus OX=10090 GN=Creld2 PE=1 SV=1	38.2	19	6	6
Agap3	Q8VHH5	1.4984	0.0447619	Up	0.951	1.351	1.026	1.482	0.664	0.723	1.129	0.694	Arf-GAP with GTPase, ANK repeat and PH domain-containing protein 3 OS=Mus musculus OX=10090 GN=Agap3 PE=1 SV=1	97.9	17	11	9
Scyl3	Q9DBQ7	1.8398	0.0222586	Up	1.05	1.614	0.86	1.668	0.679	0.552	0.903	0.688	Protein-associating with the carboxyl-terminal domain of ezrin OS=Mus musculus OX=10090 GN=Scyl3 PE=1 SV=3	81.3	4	2	2
Slc35b2	Q91ZN5	1.7774	0.0257526	Up	1.418	1.69	1.213	0.796	0.807	0.718	0.54	0.814	Adenosine 3'-phospho 5'-phosphosulfate transporter 1 OS=Mus musculus OX=10090 GN=Slc35b2 PE=1 SV=1	47.3	10	4	4
Mtpap	Q9D0D3	1.2658	0.0118987	Up	0.992	1.031	1.148	1.31	0.855	0.908	0.863	0.914	Poly(A) RNA polymerase, mitochondrial OS=Mus musculus OX=10090 GN=Mtpap PE=1 SV=1	65.2	30	9	9
Rhog	P84096	1.7024	0.00747237	Up	1.047	1.743	1.033	1.223	0.696	0.694	0.835	0.739	Rho-related GTP-binding protein RhoG OS=Mus musculus OX=10090 GN=Rhog PE=1 SV=1	21.3	37	6	5
Znf48	Q3US17	2.1943	0.0447075	Up	0.867	2.439	0.788	1.405	0.591	0.571	0.801	0.543	Zinc finger protein 48 OS=Mus musculus OX=10090 GN=Znf48 PE=1 SV=2	64.6	15	5	4
Casp8	O89110	2.3066	0.00311401	Up	1.813	1.444	1.154	1.247	0.627	0.884	0.472	0.47	Caspase-8 OS=Mus musculus OX=10090 GN=Casp8 PE=1 SV=1	55.356	11.2	4	4
Zmym4	A2A791	1.4581	0.0407606	Up	1.219	1.152	1.367	1.078	0.583	0.846	1.17	0.704	Zinc finger MYM-type protein 4 OS=Mus musculus OX=10090 GN=Zmym4 PE=1 SV=1	172.44	16.3	18	17
Agrn	A2ASQ1	1.4578	0.00966905	Up	1.211	1.418	1.194	0.979	0.692	0.93	0.883	0.789	Agrin OS=Mus musculus OX=10090 GN=Agrn PE=1 SV=1	207.54	17.2	18	18
Thada	A8C756	2.224	0.00243419	Up	1.775	1.198	1.08	1.556	0.572	0.792	0.683	0.475	Thyroid adenoma-associated protein homolog OS=Mus musculus OX=10090 GN=Thada PE=1 SV=1	217.29	6	10	10
Tut4	B2RX14	1.537	0.00567193	Up	1.076	1.163	1.418	1.272	0.952	0.642	0.756	0.857	Terminal uridylyltransferase 4 OS=Mus musculus OX=10090 GN=Tut4 PE=1 SV=2	184.65	14.5	18	16
Arxes2	C0HK80	1.7538	0.0310035	Up	1.505	1.535	1.109	0.988	0.809	0.511	1.083	0.526	Adipocyte-related X-chromosome expressed sequence 2 OS=Mus musculus OX=10090 GN=Arxes2 PE=1 SV=1	20.146	34.4	6	6
Flot1	O08917	1.9602	0.0329123	Up	1.235	1.166	1.141	1.825	0.562	0.486	1.28	0.41	Flotillin-1 OS=Mus musculus OX=10090 GN=Flot1 PE=1 SV=1	47.513	31.1	10	10
Degs1	O09005	1.4313	0.0092409	Up	1.19	1.074	1.04	1.383	0.757	0.895		0.804	Sphingolipid delta(4)-desaturase DES1 OS=Mus musculus OX=10090 GN=Degs1 PE=1 SV=1	38.241	10.8	3	3
Ptgis	O35074	3.4805	0.0129277	Up	1.404	1.949	1.013	1.878	0.556	0.465	0.64	0.133	Prostacyclin synthase OS=Mus musculus OX=10090 GN=Ptgis PE=1 SV=1	57.046	19.8	6	6
Bmpr2	O35607	2.9789	0.0368836	Up		1.711		1.253			0.424	0.571	Bone morphogenetic protein receptor type-2 OS=Mus musculus OX=10090 GN=Bmpr2 PE=1 SV=1	115.02	3.9	3	3
Bysl	O54825	1.6674	0.0409037	Up	1.261	1.601	0.909	1.263	0.594	0.676	1.19	0.559	Bystin OS=Mus musculus OX=10090 GN=Bysl PE=1 SV=3	49.783	39.9	14	14
Bloc1s1	O55102	2.2253	0.0136698	Up	0.851	1.234	1.593	1.943	0.665	0.812	0.416	0.633	Biogenesis of lysosome-related organelles complex 1 subunit 1 OS=Mus musculus OX=10090 GN=Bloc1s1 PE=1 SV=2	14.281	40	3	3
Mid1	O70583	3.1888	0.0396263	Up	0.716	1.65	0.759	3.023	0.729	0.542	0.309	0.348	E3 ubiquitin-protein ligase Midline-1 OS=Mus musculus OX=10090 GN=Mid1 PE=1 SV=2	76.135	18.2	9	9
Ttc3	O88196	1.6155	0.0032158	Up	1.139	1.107	1.486	1.289	0.881	0.689	0.876	0.662	E3 ubiquitin-protein ligase TTC3 OS=Mus musculus OX=10090 GN=Ttc3 PE=1 SV=2	223.93	17.1	22	22
Ikbkb	O88351	2.3619	0.0280332	Up	2.168	1.638	0.814	1.058	0.392	0.844	0.746	0.422	Inhibitor of nuclear factor kappa-B kinase subunit beta OS=Mus musculus OX=10090 GN=Ikbkb PE=1 SV=1	86.689	10.6	7	7
Dhcr7	O88455	1.4375	0.0262078	Up	1.242	1.239	1.173	1.117	1.111	0.845	0.77	0.593	7-dehydrocholesterol reductase OS=Mus musculus OX=10090 GN=Dhcr7 PE=1 SV=1	53.918	13.4	5	5
Capns1	O88456	1.5478	0.037874	Up	0.919	1.29	1.036	1.677	0.899	0.615	0.885	0.781	Calpain small subunit 1 OS=Mus musculus OX=10090 GN=Capns1 PE=1 SV=1	28.463	52.8	12	12
C3	P01027	2.2825	0.0480639	Up		1.771		1.175	0.576	0.503	0.857		Complement C3 OS=Mus musculus OX=10090 GN=C3 PE=1 SV=3	186.48	2	2	2
Lamc1	P02468	1.4664	0.0303172	Up	1.031	1.355	1.229	1.186	1.064	0.828	0.819	0.563	Laminin subunit gamma-1 OS=Mus musculus OX=10090 GN=Lamc1 PE=1 SV=2	177.3	18.2	18	18
Ig gamma-3 chain C region--	P03987	2.9646	0.0365692	Up	1.287	2.573		0.916	0.452	0.958	0.301	0.437	Ig gamma-3 chain C region OS=Mus musculus OX=10090 PE=1 SV=2	43.929	15.8	4	4
Tk1	P04184	3.002	0.000739098	Up	1.657	1.864	1.069	1.465	0.402	0.675	0.542	0.398	Thymidine kinase, cytosolic OS=Mus musculus OX=10090 GN=Tk1 PE=1 SV=3	25.776	35.2	7	7
Alpl	P09242	1.5958	0.0147528	Up	1.141	1.201	1.071	1.577	1.047	0.628	0.685	0.767	Alkaline phosphatase, tissue-nonspecific isozyme OS=Mus musculus OX=10090 GN=Alpl PE=1 SV=2	57.514	14.3	6	6
Nudt11	P0C028	1.5725	0.00132694	Up	1.446	1.236	1.28	1.007	0.745	0.835	0.779	0.801	Diphosphoinositol polyphosphate phosphohydrolase 3-beta OS=Mus musculus OX=10090 GN=Nudt11 PE=1 SV=1	18.593	51.8	7	4
Gsn	P13020	2.0342	0.0335469	Up	1.029	2.147	0.824	1.36	0.801	0.584	0.784	0.466	Gelsolin OS=Mus musculus OX=10090 GN=Gsn PE=1 SV=3	85.941	29.9	17	17
Ctsd	P18242	1.557	0.00818147	Up	1.093	1.55	1.081	1.19	0.842	0.674	0.935	0.705	Cathepsin D OS=Mus musculus OX=10090 GN=Ctsd PE=1 SV=1	44.953	42.4	13	13
Prkca	P20444	2.1364	0.0339442	Up		1.433		1.454	0.671	0.491	0.865		Protein kinase C alpha type OS=Mus musculus OX=10090 GN=Prkca PE=1 SV=3	76.851	5.2	2	2
Plg	P20918	2.7794	0.0102788	Up	1.593	1.307		1.907	0.539	0.385	0.401	0.981	Plasminogen OS=Mus musculus OX=10090 GN=Plg PE=1 SV=3	90.807	6.7	4	4
Plaa	P27612	1.419	0.0151203	Up	1.141	1.371	0.982	1.254	0.677	0.864	0.976	0.829	Phospholipase A-2-activating protein OS=Mus musculus OX=10090 GN=Plaa PE=1 SV=4	87.22	41.4	27	27
Stat1	P42225	1.5452	0.0455592	Up	1.059	1.409	1.434	1.018	1.155	0.67	0.546	0.813	Signal transducer and activator of transcription 1 OS=Mus musculus OX=10090 GN=Stat1 PE=1 SV=1	87.196	11.6	6	6
Crebbp	P45481	2.3736	0.0209504	Up	1.213	1.71	1.195	1.562	0.258	0.474	1.16	0.501	Histone lysine acetyltransferase CREBBP OS=Mus musculus OX=10090 GN=Crebbp PE=1 SV=3	265.49	9.7	16	9
Pfkm	P47857	1.4677	0.00533378	Up	1.102	1.319	1.292	1.107	0.707	0.802	1.013	0.762	ATP-dependent 6-phosphofructokinase, muscle type OS=Mus musculus OX=10090 GN=Pfkm PE=1 SV=3	85.268	35.9	22	19
Crkl	P47941	1.2335	0.04788	Up	1.03	1.037	1.117	1.295	0.973	0.933	0.985	0.74	Crk-like protein OS=Mus musculus OX=10090 GN=Crkl PE=1 SV=2	33.83	62.7	16	16
Inpp1	P49442	1.7735	0.024541	Up	0.856	1.208	1.432	1.695	0.776	0.554	0.962	0.635	Inositol polyphosphate 1-phosphatase OS=Mus musculus OX=10090 GN=Inpp1 PE=1 SV=2	43.346	18.2	5	5
Hsd17b8	P50171	1.6512	0.019074	Up	1.293	1.16	1.501	1.102	0.69	1.047	0.816	0.509	Estradiol 17-beta-dehydrogenase 8 OS=Mus musculus OX=10090 GN=Hsd17b8 PE=1 SV=2	26.588	29	5	5
Cpt2	P52825	2.2838	0.00558937	Up	1.268	1.616	1.123	1.618	0.574	0.372	0.912	0.605	Carnitine O-palmitoyltransferase 2, mitochondrial OS=Mus musculus OX=10090 GN=Cpt2 PE=1 SV=2	73.98	34.8	16	16
Arf3	P61205	1.2234	0.0445427	Up	1.088	1.176	0.972	1.221	0.922	1.07	0.851	0.8	ADP-ribosylation factor 3 OS=Mus musculus OX=10090 GN=Arf3 PE=2 SV=2	20.601	45.3	9	3
Hpcal1	P62748	1.6542	0.0392252	Up	1.119	1.375	1.574	0.979	0.841	1.109	0.573	0.528	Hippocalcin-like protein 1 OS=Mus musculus OX=10090 GN=Hpcal1 PE=1 SV=2	22.338	49.2	8	4
Ppp1cc	P63087	1.2938	0.0192711	Up	1.298	1.102	0.984	1.192	0.826	0.893	1.023	0.795	Serine/threonine-protein phosphatase PP1-gamma catalytic subunit OS=Mus musculus OX=10090 GN=Ppp1cc PE=1 SV=1	36.983	69.7	21	4
Gng3	P63216	1.5097	0.0466469	Up	1.078		1.079	1.59	0.893	0.747		0.842	Guanine nucleotide-binding protein G(I)/G(S)/G(O) subunit gamma-3 OS=Mus musculus OX=10090 GN=Gng3 PE=1 SV=1	8.3047	49.3	2	2
Ywhah	P68510	1.4308	0.0127043	Up	1.363	1.351	0.97	1.079	0.768	0.893	0.925	0.743	14-3-3 protein eta OS=Mus musculus OX=10090 GN=Ywhah PE=1 SV=2	28.211	69.5	21	16
Traf6	P70196	1.3856	0.0295534	Up	1.159	1.418	1.192	0.924	0.944	0.759	0.957	0.727	TNF receptor-associated factor 6 OS=Mus musculus OX=10090 GN=Traf6 PE=1 SV=2	60.069	20.8	8	8
Lxn	P70202	1.4992	0.0494888	Up	1.494	1.329	1.135	0.907	1.116	0.669	0.629	0.831	Latexin OS=Mus musculus OX=10090 GN=Lxn PE=1 SV=2	25.492	21.2	3	3
Plxna1	P70206	3.0519	0.0272862	Up	0.712	2.602	0.857	1.826	0.434	0.426	0.768	0.337	Plexin-A1 OS=Mus musculus OX=10090 GN=Plxna1 PE=1 SV=1	211.1	12.9	20	13
Pfkfb4	Q6DTY7	4.5057	0.00010057	Up		1.983		2.133	0.525	0.411	0.485	0.406	6-phosphofructo-2-kinase/fructose-2,6-bisphosphatase 4 OS=Mus musculus OX=10090 GN=Pfkfb4 PE=2 SV=4	54.066	4.1	2	2
Irf3	P70671	2.9637	0.00201399	Up	2.144	1.026	1.459	1.497	0.5	0.715	0.353	0.499	Interferon regulatory factor 3 OS=Mus musculus OX=10090 GN=Irf3 PE=1 SV=1	46.852	25.1	7	7
Gaa	P70699	2.3685	0.0371708	Up	1.573	1.968	1.063	1.052	0.72	0.208	0.916	0.544	Lysosomal alpha-glucosidase OS=Mus musculus OX=10090 GN=Gaa PE=1 SV=2	106.25	12.4	9	9
Gclc	P97494	1.8447	0.0139648	Up	1.32	1.832	0.866	1.21	0.61	0.838	0.637	0.749	Glutamate--cysteine ligase catalytic subunit OS=Mus musculus OX=10090 GN=Gclc PE=1 SV=4	72.571	18.1	10	10
Uri1	Q3TLD5	1.7374	0.0107658	Up	1.58	1.317	1.209	1.047	1.008	0.544	0.66	0.754	Unconventional prefoldin RPB5 interactor OS=Mus musculus OX=10090 GN=Uri1 PE=1 SV=2	59.083	11.7	4	4
Fam193b	Q3U2K0	3.3668	0.000629311	Up	1.09	2.274	1.626	1.205	0.506	0.493	0.474	0.367	Protein FAM193B OS=Mus musculus OX=10090 GN=Fam193b PE=1 SV=2	95.083	9.6	4	4
UPF0488 protein C8orf33 homolog--	Q3U6N9	2.118	0.0462112	Up	1.043	0.858	1.146	2.5	0.733	0.883	0.473	0.53	UPF0488 protein C8orf33 homolog OS=Mus musculus OX=10090 PE=2 SV=1	24.464	12.2	2	2
Mif4gd	Q3UBZ5	2.1665	0.0270293	Up	0.975	2.265	1.079		0.637	0.712	0.613	0.696	MIF4G domain-containing protein OS=Mus musculus OX=10090 GN=Mif4gd PE=1 SV=1	25.493	12.6	2	2
Wdr18	Q4VBE8	1.4536	0.0152878	Up	1.008	1.391	1.052	1.343	0.693	0.816	0.993	0.796	WD repeat-containing protein 18 OS=Mus musculus OX=10090 GN=Wdr18 PE=1 SV=1	47.211	55.5	16	16
Maea	Q4VC33	15.5473	0.0035648	Up		2.39		2.865	0.09	0.089	0.332	0.165	E3 ubiquitin-protein transferase MAEA OS=Mus musculus OX=10090 GN=Maea PE=1 SV=1	45.336	22.5	8	8
Ehmt1	Q5DW34	1.3991	0.00641962	Up	1.083	1.105	1.238	1.314	0.706	0.967	0.906	0.809	Histone-lysine N-methyltransferase EHMT1 OS=Mus musculus OX=10090 GN=Ehmt1 PE=1 SV=2	142	28.4	22	22
Uncharacterized protein C1orf50 homolog--	Q5EBG8	2.2099	0.0334951	Up	1.677	1.307	1.406	1.221	0.858	0.772	0.213	0.696	Uncharacterized protein C1orf50 homolog OS=Mus musculus OX=10090 PE=1 SV=1	21.862	38.2	4	4
Islr2	Q5RKR3	1.5823	0.0292832	Up	1.406	1.326	1.131	1.099	1.157	0.793	0.543	0.643	Immunoglobulin superfamily containing leucine-rich repeat protein 2 OS=Mus musculus OX=10090 GN=Islr2 PE=1 SV=1	79.757	29	15	15
Gprasp1	Q5U4C1	2.8166	8.21149e-05	Up	1.334	1.484	1.548	1.622	0.541	0.497	0.677	0.411	G-protein coupled receptor-associated sorting protein 1 OS=Mus musculus OX=10090 GN=Gprasp1 PE=1 SV=1	151.74	16.2	15	15
Repin1	Q5U4E2	1.9627	0.0251161	Up	1.251	1.561	0.978	1.578	0.341	0.797	0.821	0.776	Replication initiator 1 OS=Mus musculus OX=10090 GN=Repin1 PE=1 SV=1	61.829	9.9	4	4
Leo1	Q5XJE5	1.2045	0.0350494	Up	1.142	1.153	1.19	0.944	1.016	0.938	0.898	0.825	RNA polymerase-associated protein LEO1 OS=Mus musculus OX=10090 GN=Leo1 PE=1 SV=2	75.596	20.8	9	9
Serpinb6	Q60854	1.4297	0.0416496	Up	1.049	1.639	0.939	1.114	0.953	0.82	0.771	0.772	Serpin B6 OS=Mus musculus OX=10090 GN=Serpinb6 PE=1 SV=1	42.598	34.7	9	9
Clns1a	Q61189	2.1023	0.021494	Up		1.601	0.964	1.524	0.508		0.691	0.746	Methylosome subunit pICln OS=Mus musculus OX=10090 GN=Clns1a PE=1 SV=1	26.021	39.8	5	5
Arhgdib	Q61599	3.1995	0.0229068	Up	1.461	1.222	1.568	1.956	0.612	0.11	0.832	0.386	Rho GDP-dissociation inhibitor 2 OS=Mus musculus OX=10090 GN=Arhgdib PE=1 SV=3	22.851	46.5	4	4
Prkci	Q62074	1.6077	0.0230629	Up	1.107	1.05	1.704	1.171	0.569	0.758	0.957	0.846	Protein kinase C iota type OS=Mus musculus OX=10090 GN=Prkci PE=1 SV=3	68.203	29.9	10	10
Ssr4	Q62186	1.3691	0.0171646	Up	0.966	1.36	1.104	1.251	0.767	0.769	0.959	0.924	Translocon-associated protein subunit delta OS=Mus musculus OX=10090 GN=Ssr4 PE=1 SV=1	18.936	36.6	5	5
Sord	Q64442	1.4025	0.0485269	Up	1.19	1.115	1.051	1.397	0.562	0.894	0.955	0.978	Sorbitol dehydrogenase OS=Mus musculus OX=10090 GN=Sord PE=1 SV=3	38.249	22.4	6	6
Tgfbr1	Q64729	1.6642	0.0213267	Up	1.303	1.542	1.193	1.041	0.618	0.677	0.602	1.155	TGF-beta receptor type-1 OS=Mus musculus OX=10090 GN=Tgfbr1 PE=1 SV=1	56.178	10.5	4	4
Isy1	Q69ZQ2	1.2899	0.0289496	Up	0.996	1.08	1.454	1.053	0.894	0.876	0.88	0.903	Pre-mRNA-splicing factor ISY1 homolog OS=Mus musculus OX=10090 GN=Isy1 PE=1 SV=2	32.989	11.9	3	3
Tmcc1	Q69ZZ6	1.5393	0.0363013	Up	1.17		1.373		0.805			0.847	Transmembrane and coiled-coil domains protein 1 OS=Mus musculus OX=10090 GN=Tmcc1 PE=1 SV=2	71.642	6.5	2	2
Rprd2	Q6NXI6	1.8655	0.0350424	Up	1.087	1.762	1.019	1.361	0.665	0.917	0.855	0.366	Regulation of nuclear pre-mRNA domain-containing protein 2 OS=Mus musculus OX=10090 GN=Rprd2 PE=1 SV=1	156.58	17.2	15	15
Sik3	Q6P4S6	2.0427	0.0160379	Up	0.771	1.953	1.278	1.403	0.739	0.569	0.635	0.703	Serine/threonine-protein kinase SIK3 OS=Mus musculus OX=10090 GN=Sik3 PE=1 SV=3	145.78	7.3	7	7
Phldb1	Q6PDH0	2.839	0.0426426	Up	1.945	0.922	2.118	0.674	0.559	0.374	0.562		Pleckstrin homology-like domain family B member 1 OS=Mus musculus OX=10090 GN=Phldb1 PE=1 SV=1	150.07	4	4	4
Ado	Q6PDY2	2.2324	0.00323879	Up	0.96	1.701	1.591	1.338	0.717	0.71	0.448	0.629	2-aminoethanethiol dioxygenase OS=Mus musculus OX=10090 GN=Ado PE=1 SV=2	28.372	44.1	7	7
Ubtd2	Q6PGH0	2.3322	0.00223909	Up	1.479	1.277	0.945	1.992	0.657	0.599	0.552	0.633	Ubiquitin domain-containing protein 2 OS=Mus musculus OX=10090 GN=Ubtd2 PE=2 SV=1	26.144	42.7	5	5
Bnip1	Q6QD59	1.6678	0.039576	Up	1.33	1.622	0.973	1.115	0.813	0.466	1.058	0.685	Vesicle transport protein SEC20 OS=Mus musculus OX=10090 GN=Bnip1 PE=1 SV=1	26.175	30.7	6	6
Fcsk	Q7TMC8	4.9457	0.0193221	Up	0.648	2.663	1.09	2.246	0.36	0.381	0.308	0.295	L-fucose kinase OS=Mus musculus OX=10090 GN=Fcsk PE=1 SV=1	119.27	18.9	11	11
Map6	Q7TSJ2	1.7932	0.0254695	Up	1.169		1.762		0.773	0.996	0.722	0.778	Microtubule-associated protein 6 OS=Mus musculus OX=10090 GN=Map6 PE=1 SV=2	96.449	7.3	4	4
Dgkz	Q80UP3	1.5018	0.037115	Up	1.106	0.935	1.14	1.709	0.888	0.93	0.7	0.738	Diacylglycerol kinase zeta OS=Mus musculus OX=10090 GN=Dgkz PE=1 SV=2	104.03	4	2	2
Galnt7	Q80VA0	2.7847	0.0139264	Up	0.882	2.179	0.9	1.951	0.34	0.573	0.622	0.588	N-acetylgalactosaminyltransferase 7 OS=Mus musculus OX=10090 GN=Galnt7 PE=1 SV=2	75.418	25.1	10	10
Ddx42	Q810A7	1.3551	0.0346735	Up	1.015	1.359	1.036	1.242	0.775	0.75	1.102	0.806	ATP-dependent RNA helicase DDX42 OS=Mus musculus OX=10090 GN=Ddx42 PE=1 SV=3	101.96	46	33	33
Atl1	Q8BH66	2.4231	0.0199535	Up	1.336	1.675	0.858	1.835	0.477	0.386	1.105	0.386	Atlastin-1 OS=Mus musculus OX=10090 GN=Atl1 PE=1 SV=1	63.377	12.7	8	6
Maip1	Q8BHE8	1.9062	0.0290162	Up	1.262	1.223	1.283	1.575	0.32	0.704	0.981	0.798	m-AAA protease-interacting protein 1, mitochondrial OS=Mus musculus OX=10090 GN=Maip1 PE=1 SV=1	32.985	12	3	3
Pi4kb	Q8BKC8	2.2008	0.0446136	Up	1.2	1.823		1.318	0.465	0.417	1.301	0.447	Phosphatidylinositol 4-kinase beta OS=Mus musculus OX=10090 GN=Pi4kb PE=1 SV=2	91.514	10.8	8	8
Gpc2	Q8BKV1	2.7321	0.0355093	Up	1.384	0.748	1.846	1.661	0.814	0.482		0.252	Glypican-2 OS=Mus musculus OX=10090 GN=Gpc2 PE=2 SV=1	63.344	16.2	6	6
Plcxd3	Q8BLJ3	2.2891	0.0466972	Up	0.992		1.655	1.367	0.712	0.457			PI-PLC X domain-containing protein 3 OS=Mus musculus OX=10090 GN=Plcxd3 PE=1 SV=1	36.313	9.7	2	2
Ckap4	Q8BMK4	1.8932	0.00250631	Up	1.133	1.686	1.319	1.144	0.833	0.566	0.762	0.629	Cytoskeleton-associated protein 4 OS=Mus musculus OX=10090 GN=Ckap4 PE=1 SV=2	63.691	49.6	25	25
Acbd3	Q8BMP6	1.3729	0.0334183	Up	1.093	1.456	1.041	1.086	0.755	0.724	1.066	0.861	Golgi resident protein GCP60 OS=Mus musculus OX=10090 GN=Acbd3 PE=1 SV=3	60.18	27.8	11	11
Cnpy4	Q8BQ47	1.7102	0.00399021	Up	1.086	1.577	1.111	1.324	0.603	0.838	0.84	0.7	Protein canopy homolog 4 OS=Mus musculus OX=10090 GN=Cnpy4 PE=1 SV=1	28.093	28.6	7	7
UPF0600 protein C5orf51 homolog--	Q8BR90	1.7881	0.00419725	Up	1.067	1.508	1.139	1.466	0.835	0.609	0.853	0.6	UPF0600 protein C5orf51 homolog OS=Mus musculus OX=10090 PE=1 SV=1	33.471	28.2	5	5
Gorab	Q8BRM2	1.5111	0.0340758	Up	1.213	1.21	1.351		0.746	1.038	0.598	0.948	RAB6-interacting golgin OS=Mus musculus OX=10090 GN=Gorab PE=1 SV=1	41.486	10.3	3	3
Riox2	Q8CD15	1.8612	0.00698282	Up	0.986	1.815	1.269	1.175	0.628	0.606	0.857	0.727	Ribosomal oxygenase 2 OS=Mus musculus OX=10090 GN=Riox2 PE=1 SV=2	53.516	26.7	8	8
Scyl2	Q8CFE4	1.4344	0.000975193	Up	1.071	1.266	1.144	1.294	0.854	0.777	0.92	0.778	SCY1-like protein 2 OS=Mus musculus OX=10090 GN=Scyl2 PE=1 SV=1	103.32	17.7	12	12
Cdc34	Q8CFI2	1.9148	0.0419231	Up		1.191		1.438			0.755	0.618	Ubiquitin-conjugating enzyme E2 R1 OS=Mus musculus OX=10090 GN=Cdc34 PE=1 SV=1	26.621	20	6	5
Bag4	Q8CI61	1.4448	0.0161818	Up	1.12	1.092	1.16	1.133		0.662	0.897		BAG family molecular chaperone regulator 4 OS=Mus musculus OX=10090 GN=Bag4 PE=1 SV=2	49.094	9	3	3
Thtpa	Q8JZL3	2.2526	0.0209356	Up	1.866	0.905	1.954	0.965	0.728	0.622	0.412	0.764	Thiamine-triphosphatase OS=Mus musculus OX=10090 GN=Thtpa PE=1 SV=3	24.264	18.3	3	3
Aldh1l2	Q8K009	1.5626	0.0323217	Up	1.052	1.049	1.505	1.377	0.698	0.952	0.551	0.988	Mitochondrial 10-formyltetrahydrofolate dehydrogenase OS=Mus musculus OX=10090 GN=Aldh1l2 PE=1 SV=2	101.59	4.8	3	3
Snapc1	Q8K0S9	1.6707	0.0173612	Up	0.995	1.532		1.385	0.796	0.766	0.629	0.931	snRNA-activating protein complex subunit 1 OS=Mus musculus OX=10090 GN=Snapc1 PE=2 SV=1	44.576	10	2	2
Plekho2	Q8K124	2.3801	0.00298732	Up	1.528		1.39		0.611	0.615			Pleckstrin homology domain-containing family O member 2 OS=Mus musculus OX=10090 GN=Plekho2 PE=1 SV=1	53.872	10.1	2	2
Angel2	Q8K1C0	3.7586	0.0331553	Up	0.78	2.023		1.884	0.287	0.291	0.669		Protein angel homolog 2 OS=Mus musculus OX=10090 GN=Angel2 PE=1 SV=1	62.412	22.4	5	5
Obi1	Q8K2Y0	2.1163	0.0250053	Up	1.036	1.955	0.807	1.662	0.521	0.524	0.885	0.65	ORC ubiquitin ligase 1 OS=Mus musculus OX=10090 GN=Obi1 PE=1 SV=2	79.957	13.4	7	7
Ddx52	Q8K301	1.5249	0.0173977	Up	0.964	1.625	1.218	1.071	0.772	0.918	0.71	0.799	Probable ATP-dependent RNA helicase DDX52 OS=Mus musculus OX=10090 GN=Ddx52 PE=2 SV=2	67.473	17.7	7	7
Matr3	Q8K310	1.2393	0.0243033	Up	0.991	1.224	1.117	1.147	0.951	0.873	1.013	0.777	Matrin-3 OS=Mus musculus OX=10090 GN=Matr3 PE=1 SV=1	94.629	51.5	43	43
Spart	Q8R1X6	1.4217	0.0121616	Up	1.133	1.251	1.237	1.143	0.626	0.925	0.981	0.819	Spartin OS=Mus musculus OX=10090 GN=Spart PE=1 SV=1	72.654	23.8	9	9
Stab1	Q8R4Y4	4.8958	0.0371814	Up		2.063	1.178		0.374		0.288		Stabilin-1 OS=Mus musculus OX=10090 GN=Stab1 PE=1 SV=1	276.25	4.4	6	6
Snap47	Q8R570	1.6832	0.0330466	Up	1.005	1.574	0.999	1.485	0.703	0.516	1.069	0.72	Synaptosomal-associated protein 47 OS=Mus musculus OX=10090 GN=Snap47 PE=1 SV=1	46.524	44.6	14	14
Banp	Q8VBU8	1.4788	0.0218467	Up	1.091	1.02	1.108	1.517	0.856		0.707	0.839	Protein BANP OS=Mus musculus OX=10090 GN=Banp PE=1 SV=1	59.656	6.6	3	3
Smg8	Q8VE18	2.1031	0.0380041	Up	1.317	1.272	1.476	1.424	0.726	1.035	0.626	0.223	Protein SMG8 OS=Mus musculus OX=10090 GN=Smg8 PE=1 SV=1	109.67	13.9	8	8
Gdap1l1	Q8VE33	1.8071	0.0215932	Up	1.559	0.771	1.461	1.475	0.871	0.629	0.762	0.652	Ganglioside-induced differentiation-associated protein 1-like 1 OS=Mus musculus OX=10090 GN=Gdap1l1 PE=1 SV=1	42.317	49.7	11	11
Rpe	Q8VEE0	1.8368	0.0105055	Up		1.103	1.569	1.279		0.844	0.645	0.662	Ribulose-phosphate 3-epimerase OS=Mus musculus OX=10090 GN=Rpe PE=1 SV=1	24.945	17.5	2	2
Terf2ip	Q91VL8	1.7545	0.0029565	Up	1.454	1.249	1.265	1.206	0.573	0.971	0.753	0.652	Telomeric repeat-binding factor 2-interacting protein 1 OS=Mus musculus OX=10090 GN=Terf2ip PE=1 SV=1	43.353	38.2	10	10
Znf24	Q91VN1	2.6787	0.00759438	Up	1.045	1.843	0.953	2.02	0.534	0.469	0.797	0.388	Zinc finger protein 24 OS=Mus musculus OX=10090 GN=Znf24 PE=1 SV=1	41.918	36.4	9	9
Smap1	Q91VZ6	2.2516	0.034105	Up	1.583	1.89	0.663	1.43	0.473	0.52	0.991	0.488	Stromal membrane-associated protein 1 OS=Mus musculus OX=10090 GN=Smap1 PE=1 SV=1	47.66	15.2	5	4
As3mt	Q91WU5	1.7898	0.0287641	Up	1.549	0.933	1.41	1.37	0.838	0.465	0.581	1.056	Arsenite methyltransferase OS=Mus musculus OX=10090 GN=As3mt PE=1 SV=2	41.793	13.6	4	4
Osbpl1a	Q91XL9	2.6864	0.0313311	Up	0.551	2.13	1.312	1.858	0.537	0.652	0.554	0.435	Oxysterol-binding protein-related protein 1 OS=Mus musculus OX=10090 GN=Osbpl1a PE=1 SV=2	107.79	4.3	4	3
Fam118a	Q91YN1	2.0847	0.0261415	Up		1.46	1.396	1.428	0.666	0.618	1.082	0.374	Protein FAM118A OS=Mus musculus OX=10090 GN=Fam118a PE=1 SV=1	40.474	10.6	2	2
Camk1	Q91YS8	1.4147	0.00136887	Up	1.153	1.36	1.028	1.204	0.821	0.801	0.865	0.867	Calcium/calmodulin-dependent protein kinase type 1 OS=Mus musculus OX=10090 GN=Camk1 PE=1 SV=1	41.624	14.7	4	3
Grhpr	Q91Z53	1.4017	0.00652332	Up	1.214	1.083	1.118	1.334	0.822	0.697	0.94	0.929	Glyoxylate reductase/hydroxypyruvate reductase OS=Mus musculus OX=10090 GN=Grhpr PE=1 SV=1	35.328	29.6	7	7
Ivns1abp	Q920Q8	1.3525	0.0145894	Up	1.106	1.375	0.929	1.24	0.854	0.906	0.847	0.831	Influenza virus NS1A-binding protein homolog OS=Mus musculus OX=10090 GN=Ivns1abp PE=1 SV=2	71.58	33.8	16	16
Usp11	Q99K46	1.897	0.011753	Up	1.292	1.216	1.061	1.754	0.523	0.55	1.006	0.727	Ubiquitin carboxyl-terminal hydrolase 11 OS=Mus musculus OX=10090 GN=Usp11 PE=1 SV=4	105.38	15.6	10	8
Pls3	Q99K51	1.274	0.0214703	Up	1.067	1.149	1.11	1.212	0.995	0.899	0.959	0.709	Plastin-3 OS=Mus musculus OX=10090 GN=Pls3 PE=1 SV=3	70.741	36.3	18	14
Cstf1	Q99LC2	1.5284	0.0351741	Up	1.08	1.597	0.913	1.287	0.806	1.011	0.638	0.736	Cleavage stimulation factor subunit 1 OS=Mus musculus OX=10090 GN=Cstf1 PE=1 SV=1	48.381	43.9	14	14
Rad54l2	Q99NG0	1.7348	0.0296817	Up	1.14	1.611	1.157	1.22	0.47	0.561	1.135	0.79	Helicase ARIP4 OS=Mus musculus OX=10090 GN=Rad54l2 PE=1 SV=1	162.54	11.6	10	10
Tomm22	Q9CPQ3	1.3921	0.020181	Up	1.043	1.3	1.194	1.171	0.78	0.779	1.114	0.709	Mitochondrial import receptor subunit TOM22 homolog OS=Mus musculus OX=10090 GN=Tomm22 PE=1 SV=3	15.537	34.5	2	2
Rnf2	Q9CQJ4	1.2699	0.0353955	Up	1.157	1.245	1.079	1.045	0.891	0.811	1.106	0.756	E3 ubiquitin-protein ligase RING2 OS=Mus musculus OX=10090 GN=Rnf2 PE=1 SV=1	37.623	35.7	9	7
Nkiras2	Q9CR56	2.2849	0.0361186	Up		1.874		1.107	0.669		0.56	0.728	NF-kappa-B inhibitor-interacting Ras-like protein 2 OS=Mus musculus OX=10090 GN=Nkiras2 PE=1 SV=1	21.494	17.8	4	4
Utp23	Q9CX11	1.5487	0.0393534	Up	1.284		1.357		0.73		0.812	1.016	rRNA-processing protein UTP23 homolog OS=Mus musculus OX=10090 GN=Utp23 PE=2 SV=1	28.38	25.7	3	3
Ahsp	Q9CY02	2.0335	0.000698276	Up	1.542	1.367		1.343	0.779	0.763	0.686	0.56	Alpha-hemoglobin-stabilizing protein OS=Mus musculus OX=10090 GN=Ahsp PE=1 SV=1	11.832	26.5	2	2
Chtop	Q9CY57	5.9493	0.0202969	Up	0.694	1.416		3.048	0.255	0.297	0.315		Chromatin target of PRMT1 protein OS=Mus musculus OX=10090 GN=Chtop PE=1 SV=2	26.585	20.5	3	3
Dph7	Q9CYU6	3.4662	0.00356912	Up	2.07	1.481	1.503	1.258	0.857	0.359	0.235	0.37	Diphthine methyltransferase OS=Mus musculus OX=10090 GN=Dph7 PE=2 SV=1	53.201	26.6	8	8
Bcs1l	Q9CZP5	2.4241	0.0356557	Up	1.158	1.456	1.221	1.898	0.497	0.184	1.184	0.5	Mitochondrial chaperone BCS1 OS=Mus musculus OX=10090 GN=Bcs1l PE=1 SV=1	47.406	18.9	6	6
Arpin	Q9D0A3	2.0831	0.0101039	Up	1.675	1.399	0.839	1.317		0.606	0.658	0.619	Arpin OS=Mus musculus OX=10090 GN=Arpin PE=1 SV=1	25.193	28.3	4	4
Uncharacterized protein CXorf40 homolog--	Q9D1F3	3.1314	0.00253661	Up	1.385	1.976	1.453	0.881	0.447		0.465	0.452	Uncharacterized protein CXorf40 homolog OS=Mus musculus OX=10090 PE=1 SV=1	18.059	15.9	2	2
Ttc33	Q9D6K7	1.4184	0.00147353	Up	1.227	1.215	1.056	1.107	0.832	0.856	0.747		Tetratricopeptide repeat protein 33 OS=Mus musculus OX=10090 GN=Ttc33 PE=1 SV=1	29.371	19.5	2	2
Alkbh4	Q9D8F1	2.3184	0.0321076	Up	0.972	2.302	0.949	1.066	0.689	0.512		0.51	Alpha-ketoglutarate-dependent dioxygenase alkB homolog 4 OS=Mus musculus OX=10090 GN=Alkbh4 PE=1 SV=1	33.394	9	2	2
Bola1	Q9D8S9	1.7613	0.0207629	Up	1.652	1.119	1.547	0.899	0.574	0.761	0.675	0.952	BolA-like protein 1 OS=Mus musculus OX=10090 GN=Bola1 PE=1 SV=1	14.379	56.2	5	5
Mrgbp	Q9DAT2	1.5904	0.0227103	Up	1.03	1.541	1.13	1.28	0.592	0.857	0.641	1.042	MRG/MORF4L-binding protein OS=Mus musculus OX=10090 GN=Mrgbp PE=1 SV=2	22.436	23.5	2	2
Napa	Q9DB05	1.2383	0.00192721	Up	1.017	1.207	1.099	1.161	0.918	0.937	0.896	0.87	Alpha-soluble NSF attachment protein OS=Mus musculus OX=10090 GN=Napa PE=1 SV=1	33.189	60	15	13
Mrpl12	Q9DB15	1.507	0.00830797	Up	1.385	1.284	0.953	1.244	0.921	0.847	0.789	0.672	39S ribosomal protein L12, mitochondrial OS=Mus musculus OX=10090 GN=Mrpl12 PE=1 SV=2	21.708	22.4	5	5
Wdr53	Q9DB94	2.6847	0.011402	Up	0.66	1.588	1.878	1.783	0.477	0.616	0.616	0.492	WD repeat-containing protein 53 OS=Mus musculus OX=10090 GN=Wdr53 PE=1 SV=1	38.642	11.2	2	2
Ddx59	Q9DBN9	1.7167	0.0107986	Up	0.923	1.677	1.142	1.367	0.695	0.674	0.707	0.9	Probable ATP-dependent RNA helicase DDX59 OS=Mus musculus OX=10090 GN=Ddx59 PE=1 SV=1	68.234	10	4	4
Lactb	Q9EP89	2.2232	0.014562	Up	2.018	1.057	1.3	0.937	0.561	0.552	0.679		Serine beta-lactamase-like protein LACTB, mitochondrial OS=Mus musculus OX=10090 GN=Lactb PE=1 SV=1	60.705	8.2	2	2
Nmnat1	Q9EPA7	1.8816	0.0444053	Up	0.856	1.335	1.21	1.382	0.482	0.789			Nicotinamide/nicotinic acid mononucleotide adenylyltransferase 1 OS=Mus musculus OX=10090 GN=Nmnat1 PE=1 SV=2	32.355	22.1	4	4
Cenpk	Q9ESN5	1.7971	0.0101684	Up		1.33		1.186	0.711		0.689		Centromere protein K OS=Mus musculus OX=10090 GN=Cenpk PE=1 SV=2	31.686	14.8	2	2
Isyna1	Q9JHU9	2.4922	0.0147905	Up	1.052	2.029	0.98	1.681	0.692	0.294	0.676	0.642	Inositol-3-phosphate synthase 1 OS=Mus musculus OX=10090 GN=Isyna1 PE=1 SV=1	60.931	32.1	10	10
Stk3	Q9JI10	2.2896	0.0373981	Up	0.894	2.515	0.87	1.271	0.752	0.398	0.682	0.592	Serine/threonine-protein kinase 3 OS=Mus musculus OX=10090 GN=Stk3 PE=1 SV=1	56.855	27.4	13	9
Dmap1	Q9JI44	1.2609	0.00411938	Up	1.187	1.056	1.117	1.178	0.865	0.966	0.805	0.963	DNA methyltransferase 1-associated protein 1 OS=Mus musculus OX=10090 GN=Dmap1 PE=1 SV=1	53.129	12.8	4	4
Nup50	Q9JIH2	1.3209	0.00117445	Up	1.158	1.089	1.225	1.151	0.944	0.931	0.827	0.798	Nuclear pore complex protein Nup50 OS=Mus musculus OX=10090 GN=Nup50 PE=1 SV=3	49.485	41.4	14	14
Flii	Q9JJ28	2.4171	0.0148768	Up	1.176	1.987	1.262	1.272	0.275	0.554	0.946	0.582	Protein flightless-1 homolog OS=Mus musculus OX=10090 GN=Flii PE=1 SV=1	144.8	20.6	19	19
Phax	Q9JJT9	3.3161	0.000442548	Up	1.684	1.839	1.2	1.498	0.617	0.386	0.325	0.548	Phosphorylated adapter RNA export protein OS=Mus musculus OX=10090 GN=Phax PE=1 SV=1	43.247	33.8	14	14
Sh3glb1	Q9JK48	1.611	0.0398874	Up	0.947	1.379	1.09	1.586	0.845	0.97	0.496	0.794	Endophilin-B1 OS=Mus musculus OX=10090 GN=Sh3glb1 PE=1 SV=1	40.855	28.8	10	9
Gmeb1	Q9JL60	3.0882	0.00117786	Up	1.678	1.526		1.348	0.588		0.5	0.386	Glucocorticoid modulatory element-binding protein 1 OS=Mus musculus OX=10090 GN=Gmeb1 PE=1 SV=2	61.057	8.4	5	3
Myo18a	Q9JMH9	1.7051	0.00123863	Up	1.257	1.393	1.188	1.267	0.95	0.628	0.732	0.684	Unconventional myosin-XVIIIa OS=Mus musculus OX=10090 GN=Myo18a PE=1 SV=2	232.75	30.2	43	43
Asap1	Q9QWY8	1.2643	0.0204459	Up	1.237	1.107	1.003	1.127		0.837	0.99	0.827	Arf-GAP with SH3 domain, ANK repeat and PH domain-containing protein 1 OS=Mus musculus OX=10090 GN=Asap1 PE=1 SV=2	127.42	4.4	3	2
Limd1	Q9QXD8	1.6221	0.038914	Up	1.26	1.674	1.002	1.065	0.507	1	0.698	0.878	LIM domain-containing protein 1 OS=Mus musculus OX=10090 GN=Limd1 PE=1 SV=2	71.421	26.8	9	9
Acss2	Q9QXG4	1.7672	0.0366307	Up	1.077	1.104	0.982	2.029	0.972	0.546	0.718	0.702	Acetyl-coenzyme A synthetase, cytoplasmic OS=Mus musculus OX=10090 GN=Acss2 PE=1 SV=2	78.861	22.7	10	10
Plec	Q9QXS1	2.4299	0.0260707	Up	1.198	1.997	0.982	1.509	0.725	0.248	0.933	0.434	Plectin OS=Mus musculus OX=10090 GN=Plec PE=1 SV=3	534.18	19.8	76	75
Cbx8	Q9QXV1	1.9418	0.0147551	Up	1.647	1.603	1.3	0.792	0.857	0.599	0.628	0.667	Chromobox protein homolog 8 OS=Mus musculus OX=10090 GN=Cbx8 PE=1 SV=1	39.859	26.5	7	7
Znhit2	Q9QY66	3.2414	0.0202723	Up	1.166	2.643	0.907	0.95		0.563	0.308	0.44	Zinc finger HIT domain-containing protein 2 OS=Mus musculus OX=10090 GN=Znhit2 PE=2 SV=2	42.896	9.5	3	3
Ggcx	Q9QYC7	3.6347	0.00618912	Up	1.427		2.278		0.53	0.532		0.467	Vitamin K-dependent gamma-carboxylase OS=Mus musculus OX=10090 GN=Ggcx PE=1 SV=1	87.194	2.1	2	2
Tbl2	Q9R099	1.9367	0.0109059	Up	1.073	1.701	1.111	1.439	0.766	0.43	0.835	0.718	Transducin beta-like protein 2 OS=Mus musculus OX=10090 GN=Tbl2 PE=1 SV=2	49.583	29.9	11	11
Acox1	Q9R0H0	1.3652	0.0128921	Up	1.213	1.054	1.371	1.061	0.928	0.937	0.713	0.864	Peroxisomal acyl-coenzyme A oxidase 1 OS=Mus musculus OX=10090 GN=Acox1 PE=1 SV=5	74.648	24.1	10	10
Med20	Q9R0X0	1.4371	0.00682518	Up	1.178	1.349	1.093	0.996	0.751	0.826	0.832		Mediator of RNA polymerase II transcription subunit 20 OS=Mus musculus OX=10090 GN=Med20 PE=1 SV=1	23.192	17.5	2	2
Sorbs3	Q9R1Z8	1.3905	0.035927	Up	0.971	1.253	1.279	1.226	0.975	0.735	0.657	1.034	Vinexin OS=Mus musculus OX=10090 GN=Sorbs3 PE=1 SV=1	82.348	10.5	4	4
Atp6v0a1	Q9Z1G4	1.7693	0.00388417	Up	1.312	1.265	1.433	1.181	0.658	0.569	1.016	0.691	V-type proton ATPase 116 kDa subunit a1 OS=Mus musculus OX=10090 GN=Atp6v0a1 PE=1 SV=3	96.466	15.6	10	10
Pex11b	Q9Z210	2.1266	0.00285412	Up	1.644	1.04	1.426	1.434	0.87	0.537	0.693	0.507	Peroxisomal membrane protein 11B OS=Mus musculus OX=10090 GN=Pex11b PE=1 SV=1	28.709	24.7	4	4
Fkbp9	Q9Z247	4.2787	0.0322913	Up	1.476	2.147	0.792	1.541	0.504		0.464	0.076	Peptidyl-prolyl cis-trans isomerase FKBP9 OS=Mus musculus OX=10090 GN=Fkbp9 PE=1 SV=1	62.995	22.8	9	8
Mtmr2	Q9Z2D1	4.8312	0.0403573	Up	0.809	3.116	0.505	1.522	0.477	0.211	0.236		Myotubularin-related protein 2 OS=Mus musculus OX=10090 GN=Mtmr2 PE=1 SV=3	73.231	11	6	6
Gsdme	Q9Z2D3	1000		Up	0.081	1.447	1.202	1.283					Gasdermin-E OS=Mus musculus OX=10090 GN=Gsdme PE=1 SV=1	56.63	14.3	5	5
Ankrd16	A2AS55	1000		Up	0.204	1.759	0.171	1.82					Ankyrin repeat domain-containing protein 16 OS=Mus musculus OX=10090 GN=Ankrd16 PE=1 SV=1	39.776	10.8	2	2
Amacr	O09174	1000		Up	0.781	0.863	0.802	1.633					Alpha-methylacyl-CoA racemase OS=Mus musculus OX=10090 GN=Amacr PE=1 SV=4	41.704	7.9	2	2
Gamt	O35969	1000		Up	0.555	1.417		0.984					Guanidinoacetate N-methyltransferase OS=Mus musculus OX=10090 GN=Gamt PE=1 SV=1	26.336	10.6	2	2
Ess2	O70279	1000		Up	0.86	0.764	1.446						Splicing factor ESS-2 homolog OS=Mus musculus OX=10090 GN=Ess2 PE=1 SV=2	52.603	6.5	2	2
Tulp3	O88413	1000		Up	0.749	1.374		0.84					Tubby-related protein 3 OS=Mus musculus OX=10090 GN=Tulp3 PE=1 SV=1	51.23	6.5	2	2
Hexb	P20060	1000		Up		1.573	0.513	0.857					Beta-hexosaminidase subunit beta OS=Mus musculus OX=10090 GN=Hexb PE=1 SV=2	61.115	10.4	3	3
Stat5b	P42232	1000		Up	0.501	1.958	0.444						Signal transducer and activator of transcription 5B OS=Mus musculus OX=10090 GN=Stat5b PE=1 SV=1	90.001	5.6	4	4
Arsb	P50429	1000		Up	1.664	0.784		0.594					Arylsulfatase B OS=Mus musculus OX=10090 GN=Arsb PE=1 SV=3	59.646	7.3	2	2
Ephb4	P54761	1000		Up	0.571	1.527	0.867						Ephrin type-B receptor 4 OS=Mus musculus OX=10090 GN=Ephb4 PE=1 SV=2	108.85	8.1	6	4
Btbd1	P58544	1000		Up	0.18	1.375		1.401					BTB/POZ domain-containing protein 1 OS=Mus musculus OX=10090 GN=Btbd1 PE=1 SV=3	53.232	7.2	2	2
Lrrfip1	Q3UZ39	1000		Up		1.771	0.538	0.612					Leucine-rich repeat flightless-interacting protein 1 OS=Mus musculus OX=10090 GN=Lrrfip1 PE=1 SV=2	79.248	15.4	4	4
Wdr81	Q5ND34	1000		Up		0.616	1.7	0.768					WD repeat-containing protein 81 OS=Mus musculus OX=10090 GN=Wdr81 PE=1 SV=2	211.94	1.9	2	2
Slc27a1	Q60714	1000		Up	0.805	1.484		0.662					Long-chain fatty acid transport protein 1 OS=Mus musculus OX=10090 GN=Slc27a1 PE=1 SV=1	71.275	9.4	4	4
Ocrl	Q6NVF0	1000		Up	1.203	0.327		1.559					Inositol polyphosphate 5-phosphatase OCRL OS=Mus musculus OX=10090 GN=Ocrl PE=1 SV=1	104.28	9.8	5	5
Rpp38	Q80UU2	1000		Up	0.747		0.888	1.508					Ribonuclease P protein subunit p38 OS=Mus musculus OX=10090 GN=Rpp38 PE=1 SV=1	31.129	21.4	3	3
Tmem163	Q8C996	1000		Up	0.709	2.636	0.27	0.246					Transmembrane protein 163 OS=Mus musculus OX=10090 GN=Tmem163 PE=1 SV=1	31.193	18.4	3	3
Kct2	Q8K201	1000		Up		0.996	0.949	1.075					Keratinocyte-associated transmembrane protein 2 OS=Mus musculus OX=10090 GN=Kct2 PE=1 SV=2	28.05	8.9	2	2
Iqsec1	Q8R0S2	1000		Up		0.901	0.935	1.196					IQ motif and SEC7 domain-containing protein 1 OS=Mus musculus OX=10090 GN=Iqsec1 PE=1 SV=2	108.01	4.2	3	3
Mtres1	Q9CQF4	1000		Up	1.678	0.506		0.89					Mitochondrial transcription rescue factor 1 OS=Mus musculus OX=10090 GN=Mtres1 PE=1 SV=1	27.847	15.4	3	3
Aar2	Q9D2V5	1000		Up	0.163	2.386		0.29					Protein AAR2 homolog OS=Mus musculus OX=10090 GN=Aar2 PE=1 SV=3	43.408	11.5	3	3
Ndufaf3	Q9JKL4	1000		Up	0.591	1.206	0.757	1.482					NADH dehydrogenase [ubiquinone] 1 alpha subcomplex assembly factor 3 OS=Mus musculus OX=10090 GN=Ndufaf3 PE=1 SV=1	20.733	24.9	3	3
Abt1	Q9QYL7	1000		Up		1.73	0.396	0.797					Activator of basal transcription 1 OS=Mus musculus OX=10090 GN=Abt1 PE=2 SV=1	30.658	17.1	4	4
Mast1	Q9R1L5	1000		Up		1.133	0.776	1.092					Microtubule-associated serine/threonine-protein kinase 1 OS=Mus musculus OX=10090 GN=Mast1 PE=1 SV=3	171	4.1	4	3
Pikfyve	Q9Z1T6	1000		Up	1.402	0.94	1.056	0.686					1-phosphatidylinositol 3-phosphate 5-kinase OS=Mus musculus OX=10090 GN=Pikfyve PE=1 SV=3	236.87	2.7	3	3
Virma	A2AIV2	0.5421	3.86481e-05	Down	0.739	0.71	0.614	0.769	1.361	1.233	1.383	1.247	Protein virilizer homolog OS=Mus musculus OX=10090 GN=Virma PE=1 SV=1	201.3	12	17	17
Skt	A2AQ25	0.6063	0.0135818	Down	1.029	0.585	0.8	0.621	1.383	1.382	1.002	1.239	Sickle tail protein OS=Mus musculus OX=10090 GN=Skt PE=1 SV=1	212.9	16	25	25
Zc3h13	E9Q784	0.3739	0.00046951	Down	0.823	0.459	0.452	0.462	1.473	1.406	1.553	1.442	Zinc finger CCCH domain-containing protein 13 OS=Mus musculus OX=10090 GN=Zc3h13 PE=1 SV=1	203.6	2	4	4
Aldoc	P05063	0.6417	0.00356786	Down	0.762	0.967	0.717	0.699	1.177	1.405	1.27	1.049	Fructose-bisphosphate aldolase C OS=Mus musculus OX=10090 GN=Aldoc PE=1 SV=4	39.4	73	29	26
Dnmt1	P13864	0.7817	0.00307943	Down	0.927	0.856	0.826	0.919	1.011	1.163	1.238	1.101	DNA (cytosine-5)-methyltransferase 1 OS=Mus musculus OX=10090 GN=Dnmt1 PE=1 SV=5	183.1	49	62	62
Pcna	P17918	0.7521	0.000610367	Down	0.772	0.91	0.855	0.915	1.114	1.174	1.107	1.195	Proliferating cell nuclear antigen OS=Mus musculus OX=10090 GN=Pcna PE=1 SV=2	28.8	74	15	15
Gnao1	P18872	0.8085	0.0496092	Down	0.783	0.8	0.966	1.044	1.16	1.075	1.108	1.101	Guanine nucleotide-binding protein G(o) subunit alpha OS=Mus musculus OX=10090 GN=Gnao1 PE=1 SV=3	40.1	36	12	10
Xrcc6	P23475	0.7485	0.0326215	Down	0.637	0.859	1.054	0.891	1.132	1.259	1.13	1.076	X-ray repair cross-complementing protein 6 OS=Mus musculus OX=10090 GN=Xrcc6 PE=1 SV=5	69.4	28	13	13
Impdh2	P24547	0.7303	0.00859363	Down	0.925	0.732	0.868	0.87	0.962	1.165	1.272	1.25	Inosine-5'-monophosphate dehydrogenase 2 OS=Mus musculus OX=10090 GN=Impdh2 PE=1 SV=2	55.8	59	28	27
Xrcc5	P27641	0.6157	1.79694e-05	Down	0.758	0.735	0.804	0.77	1.329	1.233	1.132	1.287	X-ray repair cross-complementing protein 5 OS=Mus musculus OX=10090 GN=Xrcc5 PE=1 SV=4	83	36	21	21
Rpl18	P35980	0.8199	0.0233769	Down	0.734	0.966	0.957	0.963	1.12	1.099	1.105	1.091	60S ribosomal protein L18 OS=Mus musculus OX=10090 GN=Rpl18 PE=1 SV=3	21.6	38	10	10
Acyp1	P56376	0.8258	0.0489672	Down	0.83	1.038	0.795	0.974	1.096	1.066	1.088	1.154	Acylphosphatase-1 OS=Mus musculus OX=10090 GN=Acyp1 PE=1 SV=2	11.2	47	5	5
Sirt6	P59941	0.6317	0.00344169	Down	0.716	0.812	0.849	0.74	0.982	1.294	1.491	1.167	NAD-dependent protein deacetylase sirtuin-6 OS=Mus musculus OX=10090 GN=Sirt6 PE=1 SV=1	36.9	28	6	6
Pax6	P63015	0.6332	0.0282873	Down	0.863	0.556	0.83	0.871	1.172	1.352	0.888	1.515	Paired box protein Pax-6 OS=Mus musculus OX=10090 GN=Pax6 PE=1 SV=1	46.7	21	8	8
Prkdc	P97313	0.8087	0.00504452	Down	0.861	0.848	0.987	0.897	1.107	1.137	1.007	1.192	DNA-dependent protein kinase catalytic subunit OS=Mus musculus OX=10090 GN=Prkdc PE=1 SV=3	471.2	6	23	23
Fhl1	P97447	0.6667	0.00725934	Down	0.706	0.952	0.696	0.864	1.215	1.311	1.196	1.105	Four and a half LIM domains protein 1 OS=Mus musculus OX=10090 GN=Fhl1 PE=1 SV=3	31.9	62	16	16
Pde1b	Q01065	0.608	0.00926537	Down	0.718	0.878	0.598	0.851	1.089	1.382	1.525	1.012	Calcium/calmodulin-dependent 3',5'-cyclic nucleotide phosphodiesterase 1B OS=Mus musculus OX=10090 GN=Pde1b PE=1 SV=2	61.2	34	13	13
Bzw2	Q2L4X1	0.7663	0.000232651	Down	0.905	0.805	0.899	0.879	1.17	1.167	1.07	1.145	Basic leucine zipper and W2 domain-containing protein 2 OS=Mus musculus molossinus OX=57486 GN=Bzw2 PE=2 SV=1	48	50	25	21
Wdr70	Q3TWF6	0.6109	0.0187832	Down	0.677	0.789	0.873	0.712	1.109	1.618	0.869	1.398	WD repeat-containing protein 70 OS=Mus musculus OX=10090 GN=Wdr70 PE=1 SV=1	73.1	24	13	13
Limch1	Q3UH68	0.7552	0.0105939	Down	0.945	0.857	0.879	0.777	1.206	1.279	0.951	1.143	LIM and calponin homology domains-containing protein 1 OS=Mus musculus OX=10090 GN=Limch1 PE=1 SV=2	118.1	13	10	10
Sorbs2	Q3UTJ2	0.7213	0.0284184	Down	0.804	0.666	0.784	1.119	1.141	1.068	1.337	1.13	Sorbin and SH3 domain-containing protein 2 OS=Mus musculus OX=10090 GN=Sorbs2 PE=1 SV=2	132.3	27	24	23
Custos	Q3UY34	0.5302	0.0345769	Down	0.303	0.704	1.083	0.699	1.377	1.355	1.226	1.302	Protein CUSTOS OS=Mus musculus OX=10090 GN=Custos PE=2 SV=1	27.6	25	3	3
Prpf38a	Q4FK66	0.8185	0.00168531	Down	0.932	0.873	0.97	0.841	1.143	1.091	1.133	1.051	Pre-mRNA-splicing factor 38A OS=Mus musculus OX=10090 GN=Prpf38a PE=1 SV=1	37.4	28	9	9
Btf3	Q64152	0.7427	0.0165591	Down	0.923	0.687	0.934	0.883	1.059	1.219	1.033	1.303	Transcription factor BTF3 OS=Mus musculus OX=10090 GN=Btf3 PE=1 SV=3	22	56	9	9
Ubr5	Q80TP3	0.6943	0.00043792	Down	0.796	0.788	0.839	0.874	1.157	1.082	1.347	1.163	E3 ubiquitin-protein ligase UBR5 OS=Mus musculus OX=10090 GN=Ubr5 PE=1 SV=2	308.2	19	40	40
Mettl3	Q8C3P7	0.7123	0.0369621	Down	1.011	0.66	0.889	0.783	1.313	1.331	0.907	1.142	N6-adenosine-methyltransferase subunit METTL3 OS=Mus musculus OX=10090 GN=Mettl3 PE=1 SV=2	64.6	28	12	12
Mpdz	Q8VBX6	0.8276	0.0275118	Down	0.936	0.829	0.988	0.885	1.028	1.214	0.976	1.178	Multiple PDZ domain protein OS=Mus musculus OX=10090 GN=Mpdz PE=1 SV=2	218.6	15	22	22
Fam114a2	Q8VE88	0.8027	0.0114253	Down	0.935	0.848	0.812	0.985	1.107	1.114	1.156	1.083	Protein FAM114A2 OS=Mus musculus OX=10090 GN=Fam114a2 PE=1 SV=2	54	23	7	7
Nasp	Q99MD9	0.7057	0.00226792	Down	0.915	0.696	0.895	0.822	1.106	1.224	1.128	1.258	Nuclear autoantigenic sperm protein OS=Mus musculus OX=10090 GN=Nasp PE=1 SV=2	83.9	63	46	46
Rpl22l1	Q9D7S7	0.5821	0.0279707	Down	0.404	0.814	0.764	0.982	1.231	1.13	1.515	1.216	60S ribosomal protein L22-like 1 OS=Mus musculus OX=10090 GN=Rpl22l1 PE=1 SV=1	14.5	39	3	3
Nusap1	Q9ERH4	0.5797	0.0112578	Down	0.89	0.589	0.828	0.646	1.241	1.436	0.911	1.506	Nucleolar and spindle-associated protein 1 OS=Mus musculus OX=10090 GN=Nusap1 PE=1 SV=1	48.5	35	10	10
Wdr12	Q9JJA4	0.7883	0.010848	Down	1.033	0.783	0.815	0.913	1.074	1.176	1.165	1.081	Ribosome biogenesis protein WDR12 OS=Mus musculus OX=10090 GN=Wdr12 PE=1 SV=1	47.3	40	11	11
Macroh2a1	Q9QZQ8	0.7895	0.0226225	Down	0.784	0.993	0.971	0.797	1.235	1.076	1.136	1.043	Core histone macro-H2A.1 OS=Mus musculus OX=10090 GN=Macroh2a1 PE=1 SV=3	39.7	53	17	15
Tab1	Q8CF89	0.785	0.0419522	Down	1.071	0.797	0.901	0.766	0.942	1.215	1.161	1.185	TGF-beta-activated kinase 1 and MAP3K7-binding protein 1 OS=Mus musculus OX=10090 GN=Tab1 PE=1 SV=2	54.6	40	13	13
Wdr54	Q9R0D8	0.7378	0.00545969	Down	0.891	0.805	0.744	0.976	1.034	1.196	1.258	1.142	WD repeat-containing protein 54 OS=Mus musculus OX=10090 GN=Wdr54 PE=1 SV=1	35.6	28	4	4
Traf2	P39429	0.6273	0.015829	Down	0.684	1.005	0.83	0.583	1.052	1.465	1.082	1.346	TNF receptor-associated factor 2 OS=Mus musculus OX=10090 GN=Traf2 PE=1 SV=1	56	16	6	6
Tbcb	Q9D1E6	0.7813	0.0235605	Down	0.807	0.775	0.981	0.963	1.112	1.125	1.119	1.157	Tubulin-folding cofactor B OS=Mus musculus OX=10090 GN=Tbcb PE=1 SV=2	27.4	57	14	14
Tkt	P40142	0.8034	0.00146322	Down	0.849	0.946	0.899	0.886	1.084	1.224	1.06	1.088	Transketolase OS=Mus musculus OX=10090 GN=Tkt PE=1 SV=1	67.6	75	42	42
Tomm34	Q9CYG7	0.8212	0.0274967	Down	1.039	0.812	0.889	0.884	1.061	1.088	1.014	1.25	Mitochondrial import receptor subunit TOM34 OS=Mus musculus OX=10090 GN=Tomm34 PE=1 SV=1	34.3	63	16	16
Utp11	Q9CZJ1	0.8108	0.0208726	Down	0.965	0.986	0.773	0.876	1.002	1.082	1.157	1.199	Probable U3 small nucleolar RNA-associated protein 11 OS=Mus musculus OX=10090 GN=Utp11 PE=2 SV=1	30.5	20	5	5
Tecr	Q9CY27	0.804	0.0364414	Down	0.926	0.751	1.004	0.9	1.1	1.239	0.959	1.156	Very-long-chain enoyl-CoA reductase OS=Mus musculus OX=10090 GN=Tecr PE=1 SV=1	36.1	33	13	13
Zrsr2	Q62377	0.5833	0.0250702	Down	0.591	0.692	0.905	0.774	1.627	1.527	0.869	1.055	U2 small nuclear ribonucleoprotein auxiliary factor 35 kDa subunit-related protein 2 OS=Mus musculus OX=10090 GN=Zrsr2 PE=1 SV=1	55.3	8	3	3
Sorbs1	Q62417	0.8123	0.0222396	Down	0.995	0.915	0.81	0.881	1.276	1.031	1.015	1.111	Sorbin and SH3 domain-containing protein 1 OS=Mus musculus OX=10090 GN=Sorbs1 PE=1 SV=2	143	3	4	3
Tyms	P07607	0.7578	0.000850153	Down	0.871	0.874	0.874	0.848	1.04	1.1	1.28	1.155	Thymidylate synthase OS=Mus musculus OX=10090 GN=Tyms PE=1 SV=1	34.9	47	12	12
Hdlbp	Q8VDJ3	0.8203	0.00427275	Down	0.861	0.896	1.016	0.848	1.11	1.126	1.046	1.132	Vigilin OS=Mus musculus OX=10090 GN=Hdlbp PE=1 SV=1	141.7	44	53	53
Snd1	Q78PY7	0.8118	0.00139842	Down	0.947	0.91	0.863	0.882	1.046	1.078	1.209	1.104	Staphylococcal nuclease domain-containing protein 1 OS=Mus musculus OX=10090 GN=Snd1 PE=1 SV=1	102	61	52	52
Slc35e1	Q8CD26	0.634	0.0047828	Down	0.983	0.645	0.777	0.717	1.306	1.252	1.036	1.33	Solute carrier family 35 member E1 OS=Mus musculus OX=10090 GN=Slc35e1 PE=1 SV=2	44.3	8	2	2
Utp18	Q5SSI6	0.7205	0.00656443	Down	0.879	0.857	0.797	0.837	1	1.132	1.432	1.113	U3 small nucleolar RNA-associated protein 18 homolog OS=Mus musculus OX=10090 GN=Utp18 PE=1 SV=1	61.2	20	8	8
Wdr75	Q3U821	0.6648	0.0484514	Down	0.557	0.973	1.019	0.66	1.329	1.405	0.934	1.159	WD repeat-containing protein 75 OS=Mus musculus OX=10090 GN=Wdr75 PE=1 SV=1	94	16	10	10
Sec61b	Q9CQS8	0.7199	0.0408568	Down	0.686	0.868	1.025	0.785	1.216	1.282	0.875	1.3	Protein transport protein Sec61 subunit beta OS=Mus musculus OX=10090 GN=Sec61b PE=1 SV=3	10	39	3	3
Znf346	Q9R0B7	0.5633	0.0279878	Down	0.77	0.761	0.421	0.954	1.1	1.096	1.744	1.219	Zinc finger protein 346 OS=Mus musculus OX=10090 GN=Znf346 PE=1 SV=1	32.7	13	3	3
Vps18	Q8R307	0.4245	0.00941869	Down	0.469	0.729	0.466	0.74	1.272	1.756	0.832	1.803	Vacuolar protein sorting-associated protein 18 homolog OS=Mus musculus OX=10090 GN=Vps18 PE=1 SV=2	110.1	14	10	10
Scamp4	Q9JKV5	0.7083	0.00271062	Down	0.805	0.866	0.965	0.698	1.209	1.13	1.133	1.235	Secretory carrier-associated membrane protein 4 OS=Mus musculus OX=10090 GN=Scamp4 PE=1 SV=1	25.3	20	2	2
Tom1l1	Q923U0	0.6611	0.035353	Down	0.813	1.008	0.895	0.485	1.111	1.204	1.331	1.196	TOM1-like protein 1 OS=Mus musculus OX=10090 GN=Tom1l1 PE=1 SV=1	52.7	10	3	3
Thoc6	Q5U4D9	0.7635	0.00334279	Down	0.862	0.818	0.95	0.85	1.12	1.163	1.008	1.267	THO complex subunit 6 homolog OS=Mus musculus OX=10090 GN=Thoc6 PE=1 SV=1	37.3	42	9	9
Tmem87a	Q8BXN9	0.7751	0.0059907	Down	0.853	0.866	0.86	0.93	1.248	1.212	0.97	1.097	Transmembrane protein 87A OS=Mus musculus OX=10090 GN=Tmem87a PE=1 SV=1	63.3	9	3	3
Tars3	Q8BLY2	0.7198	0.0120434	Down	0.938	0.702	0.966	0.759	1.205	1.07	1.327	1.073	Threonine--tRNA ligase 2, cytoplasmic OS=Mus musculus OX=10090 GN=Tars3 PE=1 SV=1	91.3	22	14	11
Ufsp2	Q99K23	0.7388	0.0174636	Down	0.897	1.039	0.787	0.694	1.093	1.155	1.294	1.083	Ufm1-specific protease 2 OS=Mus musculus OX=10090 GN=Ufsp2 PE=1 SV=1	52.5	23	8	8
Xpo6	Q924Z6	0.6726	0.0260732	Down	0.897	0.658	0.909	0.769	1.313	1.258	0.858	1.378	Exportin-6 OS=Mus musculus OX=10090 GN=Xpo6 PE=1 SV=2	128.6	8	7	7
Rps7	P62082	0.8059	0.0172498	Down	0.756	0.905	0.962	0.964	1.106	1.13	1.014	1.201	40S ribosomal protein S7 OS=Mus musculus OX=10090 GN=Rps7 PE=2 SV=1	22.1	58	12	12
Gtf2f1	Q3THK3	0.7324	0.0226842	Down	0.815	0.799	1.059	0.723	1.213	1.31	0.968	1.146	General transcription factor IIF subunit 1 OS=Mus musculus OX=10090 GN=Gtf2f1 PE=1 SV=2	57.2	16	7	7
Rrp9	Q91WM3	0.7681	0.0333773	Down	1.047	0.878	0.846	0.72	1.321	1.124	0.988	1.112	U3 small nucleolar RNA-interacting protein 2 OS=Mus musculus OX=10090 GN=Rrp9 PE=1 SV=1	52.1	17	8	8
Pcp4	P63054	0.7675	0.00377514	Down	0.918	0.883	0.882	0.807	1.137	1.251	1.173	0.986	Calmodulin regulator protein PCP4 OS=Mus musculus OX=10090 GN=Pcp4 PE=3 SV=2	6.8	44	2	2
Dtymk	P97930	0.8198	0.0255146	Down	0.956	0.919	0.82	0.927	0.988	1.039	1.285	1.106	Thymidylate kinase OS=Mus musculus OX=10090 GN=Dtymk PE=1 SV=2	23.9	37	8	8
Nvl	Q9DBY8	0.7938	0.00455284	Down	0.8	0.885	0.914	0.959	1.045	1.062	1.214	1.161	Nuclear valosin-containing protein-like OS=Mus musculus OX=10090 GN=Nvl PE=1 SV=1	94.4	34	24	24
Mlf2	Q99KX1	0.8133	0.0221988	Down	0.864	0.841	1.028	0.87	1.112	1.233	1.116	0.969	Myeloid leukemia factor 2 OS=Mus musculus OX=10090 GN=Mlf2 PE=1 SV=1	28	33	5	5
Katnb1	Q8BG40	0.8103	0.0335297	Down	0.725	1.024	0.913	0.935	1.15	1.152	1.018	1.119	Katanin p80 WD40 repeat-containing subunit B1 OS=Mus musculus OX=10090 GN=Katnb1 PE=1 SV=1	72.6	12	6	6
Ppp6r2	Q8R3Q2	0.4989	0.0259181	Down	0.475	0.367	0.952	0.885	1.524	1.535	0.968	1.343	Serine/threonine-protein phosphatase 6 regulatory subunit 2 OS=Mus musculus OX=10090 GN=Ppp6r2 PE=1 SV=1	100.4	7	4	3
Lrrc58	Q3UGP9	0.5327	0.0231861	Down	0.422	0.786	0.686	0.909	0.971	1.228	1.828	1.235	Leucine-rich repeat-containing protein 58 OS=Mus musculus OX=10090 GN=Lrrc58 PE=2 SV=1	40.1	8	3	3
Ttf2	Q5NC05	0.775	0.0127013	Down	1.035	0.834	0.781	0.859	1.253	1.062	1.165	1.048	Transcription termination factor 2 OS=Mus musculus OX=10090 GN=Ttf2 PE=1 SV=2	125.5	10	8	8
Trip6	Q9Z1Y4	0.8258	0.0138391	Down	0.927	0.943	0.896	0.87	1.009	1.01	1.134	1.25	Thyroid receptor-interacting protein 6 OS=Mus musculus OX=10090 GN=Trip6 PE=1 SV=1	50.9	30	9	9
Polr3b	P59470	0.2537	0.045325	Down	0.627	0.291	0.444	0.28	0.635	0.739	1.196	3.903	DNA-directed RNA polymerase III subunit RPC2 OS=Mus musculus OX=10090 GN=Polr3b PE=1 SV=2	127.6	4	3	3
Rars2	Q3U186	0.7202	0.000492404	Down	0.732	0.872	0.848	0.915	1.194	1.154	1.17	1.157	Probable arginine--tRNA ligase, mitochondrial OS=Mus musculus OX=10090 GN=Rars2 PE=1 SV=1	65.3	16	9	9
Tm9sf1	Q9DBU0	0.7041	0.00485839	Down	0.708	0.847	0.966	0.801	1.181	1.346	1.069	1.122	Transmembrane 9 superfamily member 1 OS=Mus musculus OX=10090 GN=Tm9sf1 PE=2 SV=2	68.9	6	2	2
Stox2	Q499E5	0.6996	0.0234317	Down	0.788	0.824	0.656	1.044	1.171	1.296	1.311	0.956	Storkhead-box protein 2 OS=Mus musculus OX=10090 GN=Stox2 PE=2 SV=2	102.7	10	6	6
Zwilch	Q8R060	0.8211	0.0437806	Down	0.932	0.875	0.842	0.977	0.991	0.985	1.251	1.189	Protein zwilch homolog OS=Mus musculus OX=10090 GN=Zwilch PE=1 SV=1	66.8	14	5	5
Rpl17	Q9CPR4	0.8132	0.0213212	Down	0.801	0.842	1.002	0.96	1.038	1.113	1.143	1.139	60S ribosomal protein L17 OS=Mus musculus OX=10090 GN=Rpl17 PE=1 SV=3	21.4	53	14	14
Rpl30	P62889	0.8325	0.00255229	Down	0.934	0.941	0.832	0.945	1.042	1.086	1.106	1.153	60S ribosomal protein L30 OS=Mus musculus OX=10090 GN=Rpl30 PE=1 SV=2	12.8	59	8	8
Sdha	Q8K2B3	0.822	0.0494457	Down	0.733	0.911	1.058	0.922	1.167	1.148	1.009	1.085	Succinate dehydrogenase [ubiquinone] flavoprotein subunit, mitochondrial OS=Mus musculus OX=10090 GN=Sdha PE=1 SV=1	72.5	47	22	22
Fau	P62862	0.723	0.00961507	Down	0.97	0.76	0.845	0.798	1.241	1.305	0.957	1.162	40S ribosomal protein S30 OS=Mus musculus OX=10090 GN=Fau PE=1 SV=1	6.6	34	4	4
Znf326	O88291	0.7943	0.0413033	Down	0.969	0.764	1.001	0.822	1.224	1.225	0.947	1.081	DBIRD complex subunit ZNF326 OS=Mus musculus OX=10090 GN=Znf326 PE=1 SV=1	65.2	42	18	18
Ubr7	Q8BU04	0.7899	0.0361663	Down	0.981	0.762	0.949	0.854	1.073	1.267	0.943	1.206	Putative E3 ubiquitin-protein ligase UBR7 OS=Mus musculus OX=10090 GN=Ubr7 PE=1 SV=1	48	43	14	14
Ilkap	Q8R0F6	0.8051	0.00510238	Down	0.934	0.934	0.802	0.916	1.02	1.103	1.207	1.124	Integrin-linked kinase-associated serine/threonine phosphatase 2C OS=Mus musculus OX=10090 GN=Ilkap PE=1 SV=1	42.7	36	12	12
Fv1	P70213	0.8157	0.0471231	Down	1.042	0.731	0.985	0.853	1.133	1.012	1.162	1.12	Friend virus susceptibility protein 1 OS=Mus musculus OX=10090 GN=Fv1 PE=4 SV=1	52	12	3	3
Dpp8	Q80YA7	0.7942	0.00145407	Down	0.815	0.894	0.869	0.981	1.102	1.125	1.17	1.084	Dipeptidyl peptidase 8 OS=Mus musculus OX=10090 GN=Dpp8 PE=1 SV=1	102.1	16	9	9
Hnrnpll	Q921F4	0.7523	0.00238895	Down	0.788	0.929	0.802	0.935	1.041	1.154	1.21	1.186	Heterogeneous nuclear ribonucleoprotein L-like OS=Mus musculus OX=10090 GN=Hnrnpll PE=1 SV=3	64.1	52	24	24
Apip	Q9WVQ5	0.7652	0.00818114	Down	1.007	0.865	0.807	0.804	1.234	1.21	1.019	1.089	Methylthioribulose-1-phosphate dehydratase OS=Mus musculus OX=10090 GN=Apip PE=1 SV=1	26.9	42	8	8
Pfdn5	Q9WU28	0.753	0.0493891	Down	0.77	0.858	1.009	0.814	1.2	1.268	0.85	1.265	Prefoldin subunit 5 OS=Mus musculus OX=10090 GN=Pfdn5 PE=1 SV=1	17.3	62	8	8
Kdm3a	Q6PCM1	0.7354	0.00909422	Down	0.903	0.676	0.924	0.905	1.049	1.148	1.231	1.206	Lysine-specific demethylase 3A OS=Mus musculus OX=10090 GN=Kdm3a PE=1 SV=1	147.8	25	22	20
Ndc80	Q9D0F1	0.6246	0.0205767	Down	0.75	0.483	1.059	0.801	1.28	1.216	1.221	1.235	Kinetochore protein NDC80 homolog OS=Mus musculus OX=10090 GN=Ndc80 PE=1 SV=1	73.9	13	7	7
Gnl2	Q99LH1	0.6905	0.0306462	Down	1.014	0.652	0.931	0.687	1.133	1.342	1.042	1.239	Nucleolar GTP-binding protein 2 OS=Mus musculus OX=10090 GN=Gnl2 PE=1 SV=2	83.3	22	14	14
Nmral1	Q8K2T1	0.7657	0.0223776	Down	0.668	0.955	0.878	0.986	1.108	1.121	1.21	1.115	NmrA-like family domain-containing protein 1 OS=Mus musculus OX=10090 GN=Nmral1 PE=1 SV=1	34.4	34	14	14
Mpp2	Q9WV34	0.6942	0.00148313	Down	0.763	0.841	0.798	0.894	1.252	1.166	1.314	1.016	MAGUK p55 subfamily member 2 OS=Mus musculus OX=10090 GN=Mpp2 PE=1 SV=1	61.5	26	13	11
Kif15	Q6P9L6	0.7497	0.0314873	Down	0.952	0.733	1.019	0.74	1.081	1.163	1.076	1.274	Kinesin-like protein KIF15 OS=Mus musculus OX=10090 GN=Kif15 PE=1 SV=1	160	36	45	45
Kntc1	Q8C3Y4	0.7929	0.00605425	Down	0.943	0.835	0.864	0.914	0.985	1.109	1.149	1.242	Kinetochore-associated protein 1 OS=Mus musculus OX=10090 GN=Kntc1 PE=1 SV=2	250.2	15	29	29
Map3k7	Q62073	0.8012	0.0302569	Down	0.742	0.954	0.948	0.931	1.205	1.047	0.993	1.217	Mitogen-activated protein kinase kinase kinase 7 OS=Mus musculus OX=10090 GN=Map3k7 PE=1 SV=1	64.2	18	8	8
Ncor2	Q9WU42	0.7166	0.0147055	Down	0.853	0.745	0.949	0.809	1.161	1.348	0.922	1.252	Nuclear receptor corepressor 2 OS=Mus musculus OX=10090 GN=Ncor2 PE=1 SV=3	269.6	11	18	16
Gtf2i	Q9ESZ8	0.825	0.00640283	Down	0.855	0.913	0.941	0.925	0.989	1.102	1.212	1.102	General transcription factor II-I OS=Mus musculus OX=10090 GN=Gtf2i PE=1 SV=3	112.2	46	49	49
Lyar	Q08288	0.7248	0.0359329	Down	0.626	0.86	0.959	0.936	1.072	1.02	1.413	1.16	Cell growth-regulating nucleolar protein OS=Mus musculus OX=10090 GN=Lyar PE=1 SV=2	43.7	39	8	8
Nfia	Q02780	0.701	0.00827449	Down	0.905	0.827	0.89	0.69	1.181	1.411	1.035	1.098	Nuclear factor 1 A-type OS=Mus musculus OX=10090 GN=Nfia PE=1 SV=1	58.5	52	17	14
Lzts1	P60853	0.6228	0.0447786	Down	0.644	0.633	1.196	0.611	1.385	1.445	0.876	1.246	Leucine zipper putative tumor suppressor 1 OS=Mus musculus OX=10090 GN=Lzts1 PE=2 SV=3	67.2	4	3	3
Mms22l	B1AUR6	0.4904	0.0221055	Down	0.687	0.562	0.756	0.643	1.013	2.305	0.983	1.099	Protein MMS22-like OS=Mus musculus OX=10090 GN=Mms22l PE=1 SV=1	140.5	3	4	4
Nfix	P70257	0.6556	0.0407344	Down	0.516	1.104	0.83	0.735	1.249	1.402	1.218	0.989	Nuclear factor 1 X-type OS=Mus musculus OX=10090 GN=Nfix PE=1 SV=2	53.4	33	11	9
Nme7	Q9QXL8	0.7142	0.00991838	Down	0.702	1.01	0.865	0.774	1.215	1.045	1.122	1.31	Nucleoside diphosphate kinase 7 OS=Mus musculus OX=10090 GN=Nme7 PE=1 SV=1	44.4	29	10	10
Cbll1	Q9JIY2	0.7336	0.0235605	Down	1.015	0.718	0.928	0.74	1.306	1.189	0.975	1.166	E3 ubiquitin-protein ligase Hakai OS=Mus musculus OX=10090 GN=Cbll1 PE=1 SV=1	54.4	14	4	4
Pgap1	Q3UUQ7	0.829	0.0161338	Down	1.04	0.881	0.851	0.869	1.192	1.105	1.012	1.083	GPI inositol-deacylase OS=Mus musculus OX=10090 GN=Pgap1 PE=1 SV=3	104.5	33	23	23
Impdh1	P50096	0.7069	0.00152534	Down	0.839	0.76	0.827	0.907	1.053	1.11	1.325	1.227	Inosine-5'-monophosphate dehydrogenase 1 OS=Mus musculus OX=10090 GN=Impdh1 PE=1 SV=2	55.2	24	10	9
Ltn1	Q6A009	0.7446	0.00607556	Down	0.948	0.731	0.842	0.91	1.234	1.182	1.013	1.179	E3 ubiquitin-protein ligase listerin OS=Mus musculus OX=10090 GN=Ltn1 PE=1 SV=3	198.8	13	19	19
Ngdn	Q9DB96	0.8129	0.0305173	Down	0.919	0.911	0.752	1.025	1.003	1.088	1.199	1.147	Neuroguidin OS=Mus musculus OX=10090 GN=Ngdn PE=1 SV=1	35.6	17	5	5
Phf6	Q9D4J7	0.7234	0.00130631	Down	0.8	0.812	0.948	0.814	1.16	1.274	1.045	1.185	PHD finger protein 6 OS=Mus musculus OX=10090 GN=Phf6 PE=1 SV=1	41.1	39	11	11
Hacd3	Q8K2C9	0.8119	0.0365131	Down	0.999	0.811	0.94	0.849	1.19	1.149	0.92	1.174	Very-long-chain (3R)-3-hydroxyacyl-CoA dehydratase 3 OS=Mus musculus OX=10090 GN=Hacd3 PE=1 SV=2	43.1	32	9	9
Nop53	Q8BK35	0.6226	0.0316397	Down	0.56	0.608	1.027	0.895	1.021	1.214	1.124	1.604	Ribosome biogenesis protein NOP53 OS=Mus musculus OX=10090 GN=Nop53 PE=1 SV=1	55.8	14	4	4
Mta1	Q8K4B0	0.7695	0.0227578	Down	0.733	0.781	0.917	1.067	1.108	1.059	1.21	1.169	Metastasis-associated protein MTA1 OS=Mus musculus OX=10090 GN=Mta1 PE=1 SV=1	80.7	51	28	22
Noc3l	Q8VI84	0.829	0.00772432	Down	0.96	0.928	0.949	0.804	1.157	1.057	1.132	1.046	Nucleolar complex protein 3 homolog OS=Mus musculus OX=10090 GN=Noc3l PE=2 SV=2	93.2	13	8	8
Nsmce2	Q91VT1	0.6411	0.0363946	Down	0.849	0.504	0.997	0.792	1.195	1.346	0.941	1.419	E3 SUMO-protein ligase NSE2 OS=Mus musculus OX=10090 GN=Nsmce2 PE=2 SV=1	28.2	13	3	3
Sugt1	Q9CX34	0.8008	0.00773554	Down	0.997	0.816	0.909	0.852	1.185	1.049	1.042	1.187	Protein SGT1 homolog OS=Mus musculus OX=10090 GN=Sugt1 PE=1 SV=3	38.1	61	17	17
Rad51c	Q924H5	0.6328	0.015402	Down	0.96	0.66	0.746	0.756	0.932	1.126	1.33	1.546	DNA repair protein RAD51 homolog 3 OS=Mus musculus OX=10090 GN=Rad51c PE=2 SV=1	40.6	12	2	2
Prpf19	Q99KP6	0.82	0.0309802	Down	0.864	0.825	0.944	0.989	1.062	0.955	1.24	1.16	Pre-mRNA-processing factor 19 OS=Mus musculus OX=10090 GN=Prpf19 PE=1 SV=1	55.2	69	19	19
Snf8	Q9CZ28	0.7467	0.0349454	Down	0.604	0.906	1.01	0.917	1.154	1.175	1.133	1.141	Vacuolar-sorting protein SNF8 OS=Mus musculus OX=10090 GN=Snf8 PE=1 SV=1	28.9	14	3	3
Bckdha	P50136	0.7578	0.00366415	Down	0.921	0.721	0.884	0.94	1.162	1.155	1.124	1.133	2-oxoisovalerate dehydrogenase subunit alpha, mitochondrial OS=Mus musculus OX=10090 GN=Bckdha PE=1 SV=1	50.3	45	12	12
Mpc1	P63030	0.8103	0.0328483	Down	0.881	0.849	0.949	0.917	1.199	1.183	0.894	1.162	Mitochondrial pyruvate carrier 1 OS=Mus musculus OX=10090 GN=Mpc1 PE=1 SV=1	12.4	16	2	2
Med30	Q9CQI9	0.7376	0.0203467	Down	0.876	0.881	0.804	0.855	0.873	1.202	1.277	1.279	Mediator of RNA polymerase II transcription subunit 30 OS=Mus musculus OX=10090 GN=Med30 PE=1 SV=1	20.3	19	3	3
Nfasc	Q810U3	0.8315	0.0193662	Down	0.909	0.928	0.946	0.864	1.189	1.094	1.165	0.938	Neurofascin OS=Mus musculus OX=10090 GN=Nfasc PE=1 SV=1	137.9	19	16	16
Oard1	Q8R5F3	0.6858	0.0323456	Down	0.899	0.644	0.711	1.022	0.906	1.261	1.313	1.297	ADP-ribose glycohydrolase OARD1 OS=Mus musculus OX=10090 GN=Oard1 PE=1 SV=2	17.1	43	7	7
Lonp2	Q9DBN5	0.7964	0.00792958	Down	0.764	0.866	1.007	0.926	1.13	1.14	1.124	1.08	Lon protease homolog 2, peroxisomal OS=Mus musculus OX=10090 GN=Lonp2 PE=1 SV=1	94.5	5	5	5
Pou3f3	P31361	0.8212	0.0425363	Down	0.813	0.8	1.012	0.999	1.134	1.137	1.007	1.135	POU domain, class 3, transcription factor 3 OS=Mus musculus OX=10090 GN=Pou3f3 PE=2 SV=2	50.2	8	5	4
Mrpl30	Q9D7N6	0.5582	0.0334593	Down	0.711	0.742	0.804	0.626	1.733	0.896	1.02	1.516	39S ribosomal protein L30, mitochondrial OS=Mus musculus OX=10090 GN=Mrpl30 PE=1 SV=1	18.3	22	3	3
Pura	P42669	0.4443	0.00351314	Down	0.484	0.563	0.762	0.67	1.081	1.914	1.078	1.507	Transcriptional activator protein Pur-alpha OS=Mus musculus OX=10090 GN=Pura PE=1 SV=1	34.9	20	5	5
Pacs1	Q8K212	0.7984	0.0347401	Down	1.038	0.799	0.959	0.772	1.13	1.095	0.999	1.245	Phosphofurin acidic cluster sorting protein 1 OS=Mus musculus OX=10090 GN=Pacs1 PE=1 SV=2	104.8	26	21	19
Pum2	Q80U58	0.8298	0.0305983	Down	0.884	0.969	0.835	0.958	0.997	1.07	1.282	1.045	Pumilio homolog 2 OS=Mus musculus OX=10090 GN=Pum2 PE=1 SV=2	114.2	22	20	16
Rer1	Q9CQU3	0.8302	0.0352606	Down	0.897	0.946	0.828	0.976	0.983	1.016	1.267	1.127	Protein RER1 OS=Mus musculus OX=10090 GN=Rer1 PE=1 SV=1	23	19	3	3
Ccna2	P51943	0.6629	0.00960935	Down	0.797	0.659	0.961	0.791	1.002	1.249	1.136	1.452	Cyclin-A2 OS=Mus musculus OX=10090 GN=Ccna2 PE=1 SV=2	47.2	19	6	6
Cetn3	O35648	0.6625	0.0370186	Down	1.036	0.592	0.876	0.699	1.584	1.073	1.033	1.145	Centrin-3 OS=Mus musculus OX=10090 GN=Cetn3 PE=1 SV=1	19.5	40	4	4
Armh3	Q6PD19	0.7224	0.0254364	Down	0.811	0.944	0.657	0.961	1.367	1.131	0.982	1.189	Armadillo-like helical domain-containing protein 3 OS=Mus musculus OX=10090 GN=Armh3 PE=1 SV=2	78.6	12	7	7
Ablim1	Q8K4G5	0.5491	0.00995719	Down	0.59	0.702		0.769	1.431	1.05	0.988	1.536	Actin-binding LIM protein 1 OS=Mus musculus OX=10090 GN=Ablim1 PE=1 SV=1	96.7	4	2	2
Tmbim6	Q9D2C7	0.6896	0.0232552	Down	0.939	0.642	0.865	0.835	1.253	1.386	0.909	1.21	Bax inhibitor 1 OS=Mus musculus OX=10090 GN=Tmbim6 PE=1 SV=1	26.5	6	2	2
Ccnb2	P30276	0.6305	0.00162884	Down	0.706	0.804	0.696	0.907	1.181	1.298	1.393	1.065	G2/mitotic-specific cyclin-B2 OS=Mus musculus OX=10090 GN=Ccnb2 PE=1 SV=2	45.4	12	3	3
Ankrd28	Q505D1	0.6868	0.000687138	Down	0.865	0.742	0.866	0.801	1.196	1.338	1.158	1.075	Serine/threonine-protein phosphatase 6 regulatory ankyrin repeat subunit A OS=Mus musculus OX=10090 GN=Ankrd28 PE=1 SV=1	112.8	24	14	13
Hdgfl2	Q3UMU9	0.8315	0.00268138	Down	0.98	0.917	0.898	0.853	1.172	1.061	1.054	1.1	Hepatoma-derived growth factor-related protein 2 OS=Mus musculus OX=10090 GN=Hdgfl2 PE=1 SV=1	74.2	26	18	15
Ptgfrn	Q9WV91	0.7005	0.00225144	Down	0.799	0.857	0.748	0.911	1.032	1.223	1.338	1.139	Prostaglandin F2 receptor negative regulator OS=Mus musculus OX=10090 GN=Ptgfrn PE=1 SV=2	98.7	25	17	17
Ddx49	Q4FZF3	0.7298	0.0317679	Down	0.937	0.615	1.054	0.786	1.087	1.185	1.149	1.227	Probable ATP-dependent RNA helicase DDX49 OS=Mus musculus OX=10090 GN=Ddx49 PE=2 SV=1	54.1	14	6	6
Gpkow	Q56A08	0.8007	0.000792203	Down	0.907	0.87	0.84	0.958	1.075	1.083	1.183	1.124	G-patch domain and KOW motifs-containing protein OS=Mus musculus OX=10090 GN=Gpkow PE=1 SV=2	53.8	31	10	10
Gss	P51855	0.6785	0.0443074	Down	0.517	0.914	0.959	0.86	1.232	1.388	1.195	0.975	Glutathione synthetase OS=Mus musculus OX=10090 GN=Gss PE=1 SV=1	52.2	7	4	4
Gpm6b	P35803	0.7181	0.0377618	Down	0.881	0.68	0.874	0.925	1.062	1.518	1.148	0.951	Neuronal membrane glycoprotein M6-b OS=Mus musculus OX=10090 GN=Gpm6b PE=1 SV=2	36.2	16	4	4
Elp5	Q99L85	0.6996	0.0383692	Down	0.967	0.748	0.579	1.02	1.063	1.229	1.361	1.084	Elongator complex protein 5 OS=Mus musculus OX=10090 GN=Elp5 PE=2 SV=1	33.5	12	2	2
Ccs	Q9WU84	0.8251	0.0199501	Down	0.942	0.846	1.034	0.81	1.043	1.119	1.056	1.184	Copper chaperone for superoxide dismutase OS=Mus musculus OX=10090 GN=Ccs PE=1 SV=1	28.9	14	4	4
Dcc	P70211	0.7362	0.00974479	Down	0.757	0.854	0.897	0.902	1.018	1.374	1.04	1.2	Netrin receptor DCC OS=Mus musculus OX=10090 GN=Dcc PE=1 SV=2	158.2	14	15	15
Ddx50	Q99MJ9	0.8027	0.0498898	Down	0.8	1.069	0.764	0.948	1.148	0.962	1.146	1.205	ATP-dependent RNA helicase DDX50 OS=Mus musculus OX=10090 GN=Ddx50 PE=2 SV=1	82.1	26	15	15
Chtf18	Q8BIW9	0.7169	0.0180741	Down	0.614	0.989	0.871	0.886	1.071	1.217	1.209	1.19	Chromosome transmission fidelity protein 18 homolog OS=Mus musculus OX=10090 GN=Chtf18 PE=1 SV=2	108.1	11	8	8
Znhit6	Q3UFB2	0.5907	0.0266666	Down	0.559	0.555	0.93	0.948	1.159	1.079	1.513	1.314	Box C/D snoRNA protein 1 OS=Mus musculus OX=10090 GN=Znhit6 PE=1 SV=2	52.2	10	4	4
Clk3	O35492	0.5563	0.00719088	Down	0.989	0.637	0.533	0.72	1.215	1.421	1.481	1.058	Dual specificity protein kinase CLK3 OS=Mus musculus OX=10090 GN=Clk3 PE=1 SV=2	73.8	14	7	7
Dgcr8	Q9EQM6	0.7747	0.0263564	Down	1.002	0.796	0.961	0.749	1.079	1.246	0.992	1.211	Microprocessor complex subunit DGCR8 OS=Mus musculus OX=10090 GN=Dgcr8 PE=1 SV=2	86.3	18	12	12
Ncaph	Q8C156	0.8312	0.0364346	Down	0.859	0.815	1.013	0.961	0.948	1.138	1.146	1.157	Condensin complex subunit 2 OS=Mus musculus OX=10090 GN=Ncaph PE=1 SV=1	82.3	33	20	20
Ctnnbl1	Q9CWL8	0.8143	0.0146453	Down	0.909	0.903	0.802	0.995	1.042	1.06	1.249	1.081	Beta-catenin-like protein 1 OS=Mus musculus OX=10090 GN=Ctnnbl1 PE=1 SV=1	64.9	37	20	20
Ebna1bp2	Q9D903	0.8017	0.00862782	Down	0.865	0.816	0.979	0.917	1.02	1.054	1.222	1.166	Probable rRNA-processing protein EBP2 OS=Mus musculus OX=10090 GN=Ebna1bp2 PE=2 SV=1	34.7	29	8	8
Dna2	Q6ZQJ5	0.6698	0.0194672	Down	0.865	0.72	0.769	0.875	1.163	1.087	0.955	1.616	DNA replication ATP-dependent helicase/nuclease DNA2 OS=Mus musculus OX=10090 GN=Dna2 PE=1 SV=2	119.4	9	9	8
Gab1	Q9QYY0	0.776	0.022841	Down	0.814	0.813	0.967	0.916	1.268	1.248	0.948	1.059	GRB2-associated-binding protein 1 OS=Mus musculus OX=10090 GN=Gab1 PE=1 SV=2	76.8	20	9	9
Ift140	E9PY46	0.7279	0.0127606	Down	0.715	0.906	0.752	1.016	1.217	1.045	1.273	1.121	Intraflagellar transport protein 140 homolog OS=Mus musculus OX=10090 GN=Ift140 PE=1 SV=1	165.8	7	9	9
Grb10	Q60760	0.8109	0.0389378	Down	0.776	1.055	0.806	0.964	1.047	1.051	1.228	1.115	Growth factor receptor-bound protein 10 OS=Mus musculus OX=10090 GN=Grb10 PE=1 SV=2	70.5	40	21	21
Nifk	Q91VE6	0.764	0.0271858	Down	1.004	0.808	0.809	0.859	1.414	1.052	1.056	1.033	MKI67 FHA domain-interacting nucleolar phosphoprotein OS=Mus musculus OX=10090 GN=Nifk PE=1 SV=1	36.2	52	11	11
Gps2	Q921N8	0.5703	0.0240949	Down	0.67	0.502	1.234	0.515	1.37	1.262	1.203	1.287	G protein pathway suppressor 2 OS=Mus musculus OX=10090 GN=Gps2 PE=1 SV=1	36.7	5	2	2
Kif21a	Q9QXL2	0.8305	0.0339929	Down	0.768	0.882	0.946	1.05	1.163	1.119	1.058	1.05	Kinesin-like protein KIF21A OS=Mus musculus OX=10090 GN=Kif21a PE=1 SV=2	186.4	24	31	29
Lta4h	P24527	0.8063	0.0143375	Down	0.79	0.922	0.919	0.958	1.039	1.095	1.269	1.048	Leukotriene A-4 hydrolase OS=Mus musculus OX=10090 GN=Lta4h PE=1 SV=4	69	54	27	27
Frg1	P97376	0.7339	7.96494e-06	Down	0.894	0.814	0.844	0.852	1.185	1.174	1.147	1.132	Protein FRG1 OS=Mus musculus OX=10090 GN=Frg1 PE=1 SV=2	29.1	33	8	8
Leng8	Q8CBY3	0.8297	0.0209745	Down	0.997	0.881	0.896	0.869	1.156	1.108	1.182	0.945	Leukocyte receptor cluster member 8 homolog OS=Mus musculus OX=10090 GN=Leng8 PE=1 SV=1	86.7	12	7	7
Mlh1	Q9JK91	0.6926	0.039467	Down	0.666	0.664	1.073	0.888	0.927	1.338	1.307	1.18	DNA mismatch repair protein Mlh1 OS=Mus musculus OX=10090 GN=Mlh1 PE=1 SV=2	84.6	21	11	11
Atf7ip	Q7TT18	0.7786	0.00319935	Down	0.832	0.915	0.822	0.952	1.008	1.16	1.152	1.202	Activating transcription factor 7-interacting protein 1 OS=Mus musculus OX=10090 GN=Atf7ip PE=1 SV=1	138.5	21	14	14
Lrba	Q9ESE1	0.4459	0.0131462	Down	0.875	0.516	0.622	0.469	1.479	2.095	0.966	1.026	Lipopolysaccharide-responsive and beige-like anchor protein OS=Mus musculus OX=10090 GN=Lrba PE=1 SV=1	316.9	3	8	6
Gcat	O88986	0.6085	0.0255627	Down	0.572	0.773	0.599	1.105	1.047	1.181	1.601	1.182	2-amino-3-ketobutyrate coenzyme A ligase, mitochondrial OS=Mus musculus OX=10090 GN=Gcat PE=1 SV=2	44.9	42	10	10
Mccc2	Q3ULD5	0.7598	0.0248437	Down	0.841	0.821	0.974	0.834	1.178	1.237	0.891	1.261	Methylcrotonoyl-CoA carboxylase beta chain, mitochondrial OS=Mus musculus OX=10090 GN=Mccc2 PE=1 SV=1	61.3	32	13	13
Acd	Q5EE38	0.8078	0.0207516	Down	0.894	0.956	0.86	0.884	0.927	1.105	1.183	1.234	Adrenocortical dysplasia protein OS=Mus musculus OX=10090 GN=Acd PE=1 SV=1	44.7	8	2	2
Klc4	Q9DBS5	0.7464	0.0192941	Down	0.732	0.788	1.07	0.844	1.269	1.206	1.032	1.094	Kinesin light chain 4 OS=Mus musculus OX=10090 GN=Klc4 PE=1 SV=1	68.6	30	17	12
Kcna2	P63141	0.4733	0.0186997	Down	0.879	0.483	0.8	0.427	1.249	1.287	1.446	1.488	Potassium voltage-gated channel subfamily A member 2 OS=Mus musculus OX=10090 GN=Kcna2 PE=1 SV=1	56.7	5	2	2
Fsd1l	Q8BYN5	0.7013	0.00131692	Down	0.76	0.89	0.779	0.888	1.096	1.165	1.348	1.121	FSD1-like protein OS=Mus musculus OX=10090 GN=Fsd1l PE=1 SV=2	56.9	59	23	23
Limd2	Q8BGB5	0.7037	0.0401669	Down		0.753	0.906	0.774	1.281	1.239	0.852	1.238	LIM domain-containing protein 2 OS=Mus musculus OX=10090 GN=Limd2 PE=1 SV=1	14.2	21	3	2
Ssb	P32067	0.8172	0.00678712	Down	0.784	0.917	0.934	0.981	1.066	1.096	1.143	1.12	Lupus La protein homolog OS=Mus musculus OX=10090 GN=Ssb PE=1 SV=1	47.7	53	29	29
Jmjd7	P0C872	0.8088	0.0369883	Down	0.886	0.896	0.879	0.935	1.089	0.902	1.167	1.288	Bifunctional peptidase and (3S)-lysyl hydroxylase Jmjd7 OS=Mus musculus OX=10090 GN=Jmjd7 PE=1 SV=1	35.9	19	6	6
Kif21b	Q9QXL1	0.8199	0.00673302	Down	0.915	0.876	0.92	0.909	1.25	1.08	1.088	0.997	Kinesin-like protein KIF21B OS=Mus musculus OX=10090 GN=Kif21b PE=1 SV=2	186.1	23	27	25
Chordc1	Q9D1P4	0.8315	0.0481715	Down	0.972	0.752	1.017	0.905	1.182	1.137	1.071	0.995	Cysteine and histidine-rich domain-containing protein 1 OS=Mus musculus OX=10090 GN=Chordc1 PE=1 SV=1	37.3	63	15	15
Gnl3l	Q6PGG6	0.6792	0.00266935	Down	0.905	0.706	0.879	0.764	1.083	1.167	1.386	1.155	Guanine nucleotide-binding protein-like 3-like protein OS=Mus musculus OX=10090 GN=Gnl3l PE=1 SV=1	65.2	19	8	8
Bzw1	Q9CQC6	0.8083	0.0280978	Down	0.922	0.722	0.99	0.958	1.031	1.143	1.154	1.116	Basic leucine zipper and W2 domain-containing protein 1 OS=Mus musculus OX=10090 GN=Bzw1 PE=1 SV=1	48	37	21	17
Cadps	Q80TJ1	0.7304	0.00510236	Down	0.804	0.911	0.804	0.875	1.128	1.279	1.27	0.97	Calcium-dependent secretion activator 1 OS=Mus musculus OX=10090 GN=Cadps PE=1 SV=3	153	25	24	24
Hmgn2	P09602	0.4885	0.00305665	Down	0.809	0.484	0.611	0.742	1.149	1.43	1.129	1.709	Non-histone chromosomal protein HMG-17 OS=Mus musculus OX=10090 GN=Hmgn2 PE=1 SV=2	9.4	37	3	3
Fra10ac1	Q8BP78	0.4538	0.0474763	Down	0.587	0.718	0.55	0.658	0.883	2.702	1.029	0.924	Protein FRA10AC1 homolog OS=Mus musculus OX=10090 GN=Fra10ac1 PE=1 SV=3	37.2	8	2	2
Elovl5	Q8BHI7	0.4169	0.000162301	Down	0.679	0.539	0.602	0.552	1.52	1.399	1.672	1.098	Elongation of very long chain fatty acids protein 5 OS=Mus musculus OX=10090 GN=Elovl5 PE=1 SV=1	35.3	12	2	2
Abhd13	Q80UX8	0.8235	0.0152569	Down	0.944	0.783	0.954	0.949	1.015	1.167	1.071	1.155	Protein ABHD13 OS=Mus musculus OX=10090 GN=Abhd13 PE=2 SV=1	38.5	7	2	2
Cep162	Q6ZQ06	0.448	0.00347113	Down	0.896	0.552	0.426	0.623	1.349	1.088	1.633	1.504	Centrosomal protein of 162 kDa OS=Mus musculus OX=10090 GN=Cep162 PE=1 SV=2	160.8	1	2	2
Pola2	P33611	0.7296	0.0138493	Down	0.822	0.91	0.74	0.923	0.928	1.288	1.188	1.249	DNA polymerase alpha subunit B OS=Mus musculus OX=10090 GN=Pola2 PE=1 SV=2	66.2	29	13	13
Cdc20	Q9JJ66	0.4378	0.0305382	Down	0.434	0.235	0.816	0.973	1.253	1.216	1.294	1.851	Cell division cycle protein 20 homolog OS=Mus musculus OX=10090 GN=Cdc20 PE=1 SV=2	54.8	11	3	3
Dach1	Q9QYB2	0.7905	0.0491511	Down	0.705	1.07	0.903	0.872	0.982	1.142	1.243	1.124	Dachshund homolog 1 OS=Mus musculus OX=10090 GN=Dach1 PE=1 SV=1	77.9	16	10	10
Pole	Q9WVF7	0.8159	0.021509	Down	0.787	1.006	0.858	0.962	1.025	1.049	1.182	1.172	DNA polymerase epsilon catalytic subunit A OS=Mus musculus OX=10090 GN=Pole PE=1 SV=3	261.9	14	20	20
Asl	Q91YI0	0.7295	0.0474715	Down	0.794	1.013	0.735	0.848	1.233	1.476	0.986	0.952	Argininosuccinate lyase OS=Mus musculus OX=10090 GN=Asl PE=1 SV=1	51.7	28	13	13
Coq9	Q8K1Z0	0.725	0.0471339	Down	0.979	0.665	0.918	0.815	1.412	1.26	0.91	1.076	Ubiquinone biosynthesis protein COQ9, mitochondrial OS=Mus musculus OX=10090 GN=Coq9 PE=1 SV=1	35.1	13	3	3
Cpsf7	Q8BTV2	0.8289	0.00383729	Down	0.945	0.918	0.88	0.9	1.061	1.07	1.038	1.226	Cleavage and polyadenylation specificity factor subunit 7 OS=Mus musculus OX=10090 GN=Cpsf7 PE=1 SV=2	52	39	15	15
Prmt3	Q922H1	0.7398	0.00086897	Down	0.897	0.76	0.882	0.881	1.059	1.221	1.184	1.159	Protein arginine N-methyltransferase 3 OS=Mus musculus OX=10090 GN=Prmt3 PE=1 SV=2	59.9	20	10	10
Caprin1	Q60865	0.665	0.000136412	Down	0.769	0.866	0.73	0.849	1.151	1.287	1.171	1.224	Caprin-1 OS=Mus musculus OX=10090 GN=Caprin1 PE=1 SV=2	78.1	30	18	18
Dcaf13	Q6PAC3	0.8218	0.000302819	Down	0.942	0.902	0.917	0.864	1.076	1.083	1.167	1.085	DDB1- and CUL4-associated factor 13 OS=Mus musculus OX=10090 GN=Dcaf13 PE=2 SV=2	51.4	19	7	7
Pum1	Q80U78	0.726	0.0430131	Down	0.909	0.591	1.001	0.88	1.226	1.257	0.971	1.203	Pumilio homolog 1 OS=Mus musculus OX=10090 GN=Pum1 PE=1 SV=2	126.5	26	24	20
Rbmx	Q9WV02	0.5965	0.00909814	Down	0.876	0.625	0.784	0.721	1.355	1.401	0.882	1.401	RNA-binding motif protein, X chromosome OS=Mus musculus OX=10090 GN=Rbmx PE=1 SV=1	42.3	28	11	2
Sec13	Q9D1M0	0.7834	0.00419881	Down	0.794	0.864	1.021	0.851	1.174	1.129	1.1	1.103	Protein SEC13 homolog OS=Mus musculus OX=10090 GN=Sec13 PE=1 SV=3	35.5	56	16	16
Rad18	Q9QXK2	0.7202	0.0490754	Down	1.059	0.654	0.942	0.712	1.071	1.151	1.34	1.113	E3 ubiquitin-protein ligase RAD18 OS=Mus musculus OX=10090 GN=Rad18 PE=1 SV=2	57.4	17	6	6
Rad50	P70388	0.7528	0.0250083	Down	0.926	0.76	0.899	0.896	1.171	1.076	1.416	0.961	DNA repair protein RAD50 OS=Mus musculus OX=10090 GN=Rad50 PE=1 SV=1	153.49	19.4	20	20
Rad21	Q61550	0.8268	0.0120709	Down	0.965	0.816	0.973	0.923	1.227	1.105	1.051	1.064	Double-strand-break repair protein rad21 homolog OS=Mus musculus OX=10090 GN=Rad21 PE=1 SV=3	72.082	37.8	20	20
Med12	A2AGH6	0.6937	0.0318525	Down	1.028	0.81	0.586	0.896	1.131	1.063	1.436	1.156	Mediator of RNA polymerase II transcription subunit 12 OS=Mus musculus OX=10090 GN=Med12 PE=1 SV=1	244.56	9.8	16	16
Ptprs	B0V2N1	0.7272	0.00308931	Down	0.987	0.759	0.838	0.844	1.116	1.137	1.138	1.323	Receptor-type tyrosine-protein phosphatase S OS=Mus musculus OX=10090 GN=Ptprs PE=1 SV=1	211.9	21.6	25	18
Emd	O08579	0.7681	0.0129789	Down	0.954	0.726	0.971	0.88	1.171	1.07	1.266	1.09	Emerin OS=Mus musculus OX=10090 GN=Emd PE=1 SV=1	29.435	49	12	12
Nfatc2ip	O09130	0.4486	0.0405897	Down	0.472	0.639	0.594	0.816	1.822	0.616	1.314	1.868	NFATC2-interacting protein OS=Mus musculus OX=10090 GN=Nfatc2ip PE=1 SV=1	45.121	13.3	3	3
Timm44	O35857	0.7722	0.0162595	Down	0.858	0.746	0.851	1.087	1.148	1.091	1.203	1.145	Mitochondrial import inner membrane translocase subunit TIM44 OS=Mus musculus OX=10090 GN=Timm44 PE=1 SV=2	51.091	42.9	19	19
Eif6	O55135	0.7349	0.047811	Down	0.608	0.902	0.928	1.002	1.257	1.169	0.97	1.285	Eukaryotic translation initiation factor 6 OS=Mus musculus OX=10090 GN=Eif6 PE=1 SV=2	26.511	46.9	7	7
Supt5h	O55201	0.8221	0.0380115	Down	0.868	0.887	1.091	0.814	1.212	1.038	1.168	1.034	Transcription elongation factor SPT5 OS=Mus musculus OX=10090 GN=Supt5h PE=1 SV=1	120.66	36.6	27	27
Tspan6	O70401	0.3792	0.0242498	Down		0.442		0.515	1.432	1.735	1.098	0.782	Tetraspanin-6 OS=Mus musculus OX=10090 GN=Tspan6 PE=1 SV=1	27.333	12.2	2	2
Zfr	O88532	0.7492	0.0135007	Down	0.832	0.921	0.922	0.79	1.103	1.25	1.319	0.953	Zinc finger RNA-binding protein OS=Mus musculus OX=10090 GN=Zfr PE=1 SV=2	116.86	35.8	28	28
Rpp30	O88796	0.7721	0.0121063	Down	0.924	0.806	0.862	0.951	1.033	1.33	1.032	1.194	Ribonuclease P protein subunit p30 OS=Mus musculus OX=10090 GN=Rpp30 PE=1 SV=1	29.473	31	7	7
Mtnd4	P03911	0.5798	0.038896	Down	0.619	0.922	0.638	0.816	1.179	1.046	0.934	2.007	NADH-ubiquinone oxidoreductase chain 4 OS=Mus musculus OX=10090 GN=Mtnd4 PE=1 SV=1	51.881	7.8	3	3
Dmd	P11531	0.3446	0.0357744	Down	0.376	0.782	0.553	0.345	0.785	2.723	1.69	0.769	Dystrophin OS=Mus musculus OX=10090 GN=Dmd PE=1 SV=3	425.83	4.2	13	13
Msh3	P13705	0.438	0.00801594	Down	0.646	0.496	0.853	0.468	1.5	1.03	2.02	1.073	DNA mismatch repair protein Msh3 OS=Mus musculus OX=10090 GN=Msh3 PE=2 SV=3	123.07	10.9	7	7
Rpl13a	P19253	0.7421	0.0373055	Down	1.11	0.747	0.871	0.739	1.294	1.172	0.965	1.241	60S ribosomal protein L13a OS=Mus musculus OX=10090 GN=Rpl13a PE=1 SV=4	23.464	34	8	8
Adh5	P28474	0.6876	0.0280016	Down	1.06	0.681	0.819	0.762	0.992	1.053	1.364	1.422	Alcohol dehydrogenase class-3 OS=Mus musculus OX=10090 GN=Adh5 PE=1 SV=3	39.547	63.9	16	16
Ccnd2	P30280	0.5281	0.0113661	Down	0.694		0.585		0.949	1.255	1.451	1.189	G1/S-specific cyclin-D2 OS=Mus musculus OX=10090 GN=Ccnd2 PE=1 SV=1	32.897	13.8	3	3
Fmr1	P35922	0.7373	0.00387237	Down	0.976	0.806	0.785	0.885	1.058	1.249	1.104	1.271	Synaptic functional regulator FMR1 OS=Mus musculus OX=10090 GN=Fmr1 PE=1 SV=1	68.988	44.5	19	16
Ppp3cb	P48453	0.6913	0.019006	Down	0.874	0.833	0.679	0.917	1.399	1.154	1.308	0.917	Serine/threonine-protein phosphatase 2B catalytic subunit beta isoform OS=Mus musculus OX=10090 GN=Ppp3cb PE=1 SV=2	59.173	33.7	12	6
Dock4	P59764	0.5569	0.0145212	Down	0.606		0.788		1.291	1.328		1.136	Dedicator of cytokinesis protein 4 OS=Mus musculus OX=10090 GN=Dock4 PE=1 SV=1	226.55	1.6	2	2
Ruvbl1	P60122	0.7732	0.0112723	Down	0.746	0.915	0.969	0.908	1.017	1.132	1.253	1.174	RuvB-like 1 OS=Mus musculus OX=10090 GN=Ruvbl1 PE=1 SV=1	50.213	66.2	28	28
Rps11	P62281	0.8033	0.022263	Down	0.792	1.081	0.913	0.817	1.13	1.093	1.189	1.073	40S ribosomal protein S11 OS=Mus musculus OX=10090 GN=Rps11 PE=1 SV=3	18.431	57.6	14	14
Gtf2b	P62915	0.8125	0.0462794	Down	1.007	0.917	0.851	0.857	0.989	1.21	1.293	0.978	Transcription initiation factor IIB OS=Mus musculus OX=10090 GN=Gtf2b PE=1 SV=1	34.819	38.3	10	10
Psmb7	P70195	0.7936	0.026574	Down	1.014	0.994	0.753	0.823	1.032	1.147	1.228	1.109	Proteasome subunit beta type-7 OS=Mus musculus OX=10090 GN=Psmb7 PE=1 SV=1	29.891	70	15	15
Ctps1	P70698	0.8236	0.0071645	Down	1.039	0.858	0.92	0.852	1.091	1.172	1.085	1.107	CTP synthase 1 OS=Mus musculus OX=10090 GN=Ctps1 PE=1 SV=2	66.682	55	26	24
Cct7	P80313	0.8321	0.0100047	Down	0.864	0.917	0.907	0.999	1.017	1.063	1.216	1.135	T-complex protein 1 subunit eta OS=Mus musculus OX=10090 GN=Cct7 PE=1 SV=1	59.652	68.9	33	33
Cplx2	P84086	0.4046	0.0278844	Down	0.606		0.462	0.67	1.626	1.809	0.861		Complexin-2 OS=Mus musculus OX=10090 GN=Cplx2 PE=1 SV=1	15.394	29.9	3	3
Gas1	Q01721	0.4588	0.00644689	Down	0.764	0.692	0.674	0.414	1.059	1.284	1.962	1.24	Growth arrest-specific protein 1 OS=Mus musculus OX=10090 GN=Gas1 PE=1 SV=2	35.694	25.1	6	6
Cdon	Q32MD9	0.4421	0.0484141	Down	0.202	0.657	0.483	1.126	1.477	1.124	1.954	1.027	Cell adhesion molecule-related/down-regulated by oncogenes OS=Mus musculus OX=10090 GN=Cdon PE=1 SV=2	135.42	11	9	9
Marchf5	Q3KNM2	0.7334	0.00324513	Down	0.746	0.896	0.88	0.916	1.101	1.136	1.112	1.339	E3 ubiquitin-protein ligase MARCHF5 OS=Mus musculus OX=10090 GN=Marchf5 PE=1 SV=1	31.231	28.1	5	5
Cwc27	Q3TKY6	0.531	0.0103057	Down	0.456	0.943	0.607	0.797	1.051	1.312	1.565	1.351	Spliceosome-associated protein CWC27 homolog OS=Mus musculus OX=10090 GN=Cwc27 PE=1 SV=1	53.542	20	5	5
Mpnd	Q3TV65	0.6009	0.0234064	Down	1.05	0.587	0.729	0.688	1.522	0.887	1.32	1.353	MPN domain-containing protein OS=Mus musculus OX=10090 GN=Mpnd PE=2 SV=2	53.376	15.2	4	4
Cybc1	Q3TYS2	0.6534	0.0012045	Down	0.853	0.862	0.854	0.751		1.422	1.232	1.157	Cytochrome b-245 chaperone 1 OS=Mus musculus OX=10090 GN=Cybc1 PE=1 SV=2	20.921	24.1	4	4
Gse1	Q3U3C9	0.6262	0.0203637	Down	0.576	0.703	0.727	1.118	1.175	1.075	1.508	1.231	Genetic suppressor element 1 OS=Mus musculus OX=10090 GN=Gse1 PE=1 SV=2	136.23	8	5	5
Tax1bp1	Q3UKC1	0.7737	0.00342557	Down	0.879	0.939		0.835		1.128	1.105	1.196	Tax1-binding protein 1 homolog OS=Mus musculus OX=10090 GN=Tax1bp1 PE=1 SV=2	93.629	3.6	2	2
Lrch2	Q3UMG5	0.5935	0.013791	Down	0.528	0.962	0.74	0.769	1.456	1.218	1.409	0.97	Leucine-rich repeat and calponin homology domain-containing protein 2 OS=Mus musculus OX=10090 GN=Lrch2 PE=2 SV=2	84.988	22.6	13	12
Trp53i11	Q4QQM4	0.5594	0.0202985	Down	0.861	0.419	0.903	0.732	1.517	1.405	1.262	1.027	Tumor protein p53-inducible protein 11 OS=Mus musculus OX=10090 GN=Trp53i11 PE=1 SV=1	20.91	13.8	3	3
Fzd3	Q61086	0.36	0.0463305	Down	0.834	0.222	0.864	0.24	1.268	1.466	1.718	1.548	Frizzled-3 OS=Mus musculus OX=10090 GN=Fzd3 PE=1 SV=1	76.207	5	3	3
Papola	Q61183	0.7506	0.00745725	Down	0.846	0.894	0.903	0.839	0.941	1.27	1.225	1.203	Poly(A) polymerase alpha OS=Mus musculus OX=10090 GN=Papola PE=1 SV=4	82.308	42.9	24	22
Col11a1	Q61245	0.4932	0.0143702	Down	0.944	0.656	0.666	0.548	1.215		1.913	1.151	Collagen alpha-1(XI) chain OS=Mus musculus OX=10090 GN=Col11a1 PE=1 SV=2	181.03	1.7	2	2
Tcf12	Q61286	0.6987	0.0440325	Down	1.017	0.633	0.822	0.881	1.043	1.513	0.973	1.27	Transcription factor 12 OS=Mus musculus OX=10090 GN=Tcf12 PE=1 SV=2	75.81	26.1	10	8
Ewsr1	Q61545	0.6902	0.0189639	Down	0.997	0.761	0.93	0.636	1.144	1.354	1.026	1.292	RNA-binding protein EWS OS=Mus musculus OX=10090 GN=Ewsr1 PE=1 SV=2	68.461	16.2	9	9
Prkd1	Q62101	0.5498	0.00664862	Down	0.67	0.701	0.915	0.594	0.936	1.412	1.594	1.296	Serine/threonine-protein kinase D1 OS=Mus musculus OX=10090 GN=Prkd1 PE=1 SV=2	102.04	14.7	9	4
Knl1	Q66JQ7	0.3601	0.00874114	Down	0.656	0.527		0.431		1.074	1.948	1.46	Kinetochore scaffold 1 OS=Mus musculus OX=10090 GN=Knl1 PE=1 SV=3	179.33	1.5	2	2
Tasor	Q69ZR9	0.687	0.046845	Down	0.563	0.734	1.159	0.862	1.232	1.195	1.031	1.372	Protein TASOR OS=Mus musculus OX=10090 GN=Tasor PE=1 SV=2	181.39	2.4	3	3
Pds5a	Q6A026	0.8289	0.0233731	Down	1.013	0.903	0.867	0.889	1.104	1.086	1.258	0.982	Sister chromatid cohesion protein PDS5 homolog A OS=Mus musculus OX=10090 GN=Pds5a PE=1 SV=3	150.33	32.5	35	31
Zmiz1	Q6P1E1	0.7399	0.00768377	Down	1.006	0.784	0.803	0.857	1.339	1.063	1.176	1.085	Zinc finger MIZ domain-containing protein 1 OS=Mus musculus OX=10090 GN=Zmiz1 PE=1 SV=1	115.85	11.8	10	7
Magi1	Q6RHR9	0.5603	0.000165584	Down	0.716	0.755	0.721	0.716	1.25	1.369	1.38	1.191	Membrane-associated guanylate kinase, WW and PDZ domain-containing protein 1 OS=Mus musculus OX=10090 GN=Magi1 PE=1 SV=1	161.97	10.7	8	8
Ntrk3	Q6VNS1	0.0245	0.0374496	Down		0.035		0.045	3.773		0.35	0.784	NT-3 growth factor receptor OS=Mus musculus OX=10090 GN=Ntrk3 PE=1 SV=1	92.759	3.6	3	3
Tacc1	Q6Y685	0.6984	0.0138915	Down	0.862	1.009	0.695	0.767	1.308	1.033	1.076	1.355	Transforming acidic coiled-coil-containing protein 1 OS=Mus musculus OX=10090 GN=Tacc1 PE=1 SV=1	83.951	9.8	7	6
Eif2s1	Q6ZWX6	0.833	0.000213711	Down	0.935	0.897	0.955	0.903	1.152	1.057	1.11	1.111	Eukaryotic translation initiation factor 2 subunit 1 OS=Mus musculus OX=10090 GN=Eif2s1 PE=1 SV=3	36.108	69.5	24	24
Mtch2	Q791V5	0.7856	0.0423134	Down	1.013	0.748	0.973	0.845	1.347	1.031	1.026	1.152	Mitochondrial carrier homolog 2 OS=Mus musculus OX=10090 GN=Mtch2 PE=1 SV=1	33.499	29.4	8	8
Plppr3	Q7TPB0	0.2363	0.00921635	Down			0.433	0.206	1.738	1.24	1.532	0.898	Phospholipid phosphatase-related protein type 3 OS=Mus musculus OX=10090 GN=Plppr3 PE=1 SV=1	76.692	12	5	5
Atxn2l	Q7TQH0	0.7029	0.00164605	Down	0.959	0.787	0.807	0.802	1.264	1.206	1.04	1.263	Ataxin-2-like protein OS=Mus musculus OX=10090 GN=Atxn2l PE=1 SV=1	110.65	28.7	23	22
Gng5	Q80SZ7	0.7061	0.043474	Down	1.053	0.76	0.991	0.566	1.142	1.211	1.105	1.315	Guanine nucleotide-binding protein G(I)/G(S)/G(O) subunit gamma-5 OS=Mus musculus OX=10090 GN=Gng5 PE=1 SV=2	7.3184	77.9	4	4
Flnb	Q80X90	0.8269	0.026731	Down	0.92	0.997	0.791	0.955	1.184	1.007	1.188	1.051	Filamin-B OS=Mus musculus OX=10090 GN=Flnb PE=1 SV=3	277.82	52	106	99
Arhgap33	Q80YF9	0.0386	0.0201922	Down		0.106	0.041		2.087	1.721			Rho GTPase-activating protein 33 OS=Mus musculus OX=10090 GN=Arhgap33 PE=1 SV=1	139.8	4.9	4	4
Srgap3	Q812A2	0.6969	0.0038502	Down	0.721	0.793	0.857	0.958	1.105	1.23	1.357	1.085	SLIT-ROBO Rho GTPase-activating protein 3 OS=Mus musculus OX=10090 GN=Srgap3 PE=1 SV=1	124.42	20.1	16	14
Krr1	Q8BGA5	0.4706	0.0319007	Down	0.417	1.285	0.51	0.377	1.202	1.114	1.216	1.969	KRR1 small subunit processome component homolog OS=Mus musculus OX=10090 GN=Krr1 PE=2 SV=1	43.537	10.3	4	4
Slc4a7	Q8BTY2	0.5863	0.0485692	Down	0.408	0.575	0.978	1.038	1.11	1.293	1.609	1.103	Sodium bicarbonate cotransporter 3 OS=Mus musculus OX=10090 GN=Slc4a7 PE=1 SV=2	116.51	8.1	6	6
Slc38a2	Q8CFE6	0.5371	0.0285688	Down	1.081		0.461	0.514	1.185	1.413	1.237	1.269	Sodium-coupled neutral amino acid transporter 2 OS=Mus musculus OX=10090 GN=Slc38a2 PE=1 SV=1	55.503	9.1	2	2
Rfk	Q8CFV9	0.4626	0.00459984	Down	0.695	0.818	0.633	0.559	1.849	1.429		1.108	Riboflavin kinase OS=Mus musculus OX=10090 GN=Rfk PE=1 SV=2	17.437	19.4	3	3
Mturn	Q8CGA4	0.4498	0.0323052	Down	0.694	0.537			1.267	1.47			Maturin OS=Mus musculus OX=10090 GN=Mturn PE=1 SV=1	14.841	15.3	2	2
Eif2b5	Q8CHW4	0.6368	0.000728238	Down	0.899	0.784	0.705	0.766	1.124	1.401	1.275	1.153	Translation initiation factor eIF-2B subunit epsilon OS=Mus musculus OX=10090 GN=Eif2b5 PE=1 SV=1	80.085	20.8	11	11
Cc2d1a	Q8K1A6	0.768	0.00270687	Down	0.899	0.947	0.864	0.835	1.254	1.103	1.105		Coiled-coil and C2 domain-containing protein 1A OS=Mus musculus OX=10090 GN=Cc2d1a PE=1 SV=2	103.7	6.8	4	4
Arfip2	Q8K221	0.6097	0.0211813	Down	0.902	0.546	0.826	0.932	1.448		1.175	1.321	Arfaptin-2 OS=Mus musculus OX=10090 GN=Arfip2 PE=1 SV=2	37.772	7.3	2	2
Fanci	Q8K368	0.6153	0.0284615	Down	0.809	1.004	0.562	0.718	0.945	1.435	1.079	1.568	Fanconi anemia group I protein homolog OS=Mus musculus OX=10090 GN=Fanci PE=1 SV=2	149.32	10.2	9	9
Vrk3	Q8K3G5	0.6839	0.018546	Down	0.989	0.791	0.746	0.771	1.127	1.566	0.996	1.132	Inactive serine/threonine-protein kinase VRK3 OS=Mus musculus OX=10090 GN=Vrk3 PE=1 SV=2	50.829	11.7	4	4
Mcfd2	Q8K5B2	0.4826	0.0352004	Down	0.857	0.386	0.974	0.447	1.768	1.103	0.918	1.731	Multiple coagulation factor deficiency protein 2 homolog OS=Mus musculus OX=10090 GN=Mcfd2 PE=1 SV=1	16.168	35.9	2	2
Ubac2	Q8R1K1	0.3419	0.0261629	Down		0.547		0.485			1.755	1.263	Ubiquitin-associated domain-containing protein 2 OS=Mus musculus OX=10090 GN=Ubac2 PE=1 SV=1	39.056	7.2	2	2
Ubqln1	Q8R317	0.6875	0.0425955	Down	0.735	0.84	0.965	0.78	1.235	1.25	0.83	1.514	Ubiquilin-1 OS=Mus musculus OX=10090 GN=Ubqln1 PE=1 SV=1	61.976	26.5	11	9
Gpn1	Q8VCE2	0.5711	0.0277989	Down	0.823	0.596	0.76	0.76	1.211	1.747	1.402	0.786	GPN-loop GTPase 1 OS=Mus musculus OX=10090 GN=Gpn1 PE=1 SV=1	41.598	19.1	4	4
Parn	Q8VDG3	0.4853	0.0122178	Down	0.649	0.426	0.974	0.631	1.171	1.296	1.124	1.931	Poly(A)-specific ribonuclease PARN OS=Mus musculus OX=10090 GN=Parn PE=1 SV=1	71.558	21.8	11	11
Gatad2b	Q8VHR5	0.7663	0.0370433	Down	0.727	0.907	0.989	0.895	1.074	1.419	1.03	1.068	Transcriptional repressor p66-beta OS=Mus musculus OX=10090 GN=Gatad2b PE=1 SV=1	65.41	32.5	15	15
Rbm5	Q91YE7	0.7554	0.0318041	Down	1	0.702	0.938	0.863	1.353	1.073	1.003	1.208	RNA-binding protein 5 OS=Mus musculus OX=10090 GN=Rbm5 PE=1 SV=1	92.31	11.9	10	9
Prc1	Q99K43	0.6369	0.0250709	Down	0.965	0.649	0.887	0.676	0.935	1.463	1.097	1.493	Protein regulator of cytokinesis 1 OS=Mus musculus OX=10090 GN=Prc1 PE=1 SV=2	70.289	26.5	14	14
Me2	Q99KE1	0.7193	0.00171898	Down	0.87	0.899	0.783	0.844	1.192	1.257	1.007	1.265	NAD-dependent malic enzyme, mitochondrial OS=Mus musculus OX=10090 GN=Me2 PE=1 SV=1	65.798	23.9	9	9
Dnaja3	Q99M87	0.6716	0.0463742	Down	0.887	0.726	0.852	0.795	1.442	1.465	0.89	1.057	DnaJ homolog subfamily A member 3, mitochondrial OS=Mus musculus OX=10090 GN=Dnaja3 PE=1 SV=1	52.443	15	6	6
Ppid	Q9CR16	0.7793	0.000300388	Down	0.953	0.865	0.894	0.844	1.207	1.124	1.094	1.138	Peptidyl-prolyl cis-trans isomerase D OS=Mus musculus OX=10090 GN=Ppid PE=1 SV=3	40.742	71.6	25	25
Tmem9	Q9CR23	0.5691	0.0237523	Down	0.664	0.716	1.108	0.459	1.198	1.629	1.093	1.258	Proton-transporting V-type ATPase complex assembly regulator TMEM9 OS=Mus musculus OX=10090 GN=Tmem9 PE=1 SV=1	20.633	21.3	3	2
Tmed5	Q9CXE7	0.2849	0.0186377	Down	0.376	0.544	0.428	0.422	1.476	1.556	2.657	0.523	Transmembrane emp24 domain-containing protein 5 OS=Mus musculus OX=10090 GN=Tmed5 PE=1 SV=1	26.172	22.7	3	3
Aldh1b1	Q9CZS1	0.0798	0.00541438	Down	0.157	0.153				1.587		2.298	Aldehyde dehydrogenase X, mitochondrial OS=Mus musculus OX=10090 GN=Aldh1b1 PE=1 SV=1	57.552	8.3	3	2
Rars1	Q9D0I9	0.7969	0.0072806	Down	0.866	0.813	1.01	0.92	1.129	1.073	1.082	1.245	Arginine--tRNA ligase, cytoplasmic OS=Mus musculus OX=10090 GN=Rars1 PE=1 SV=2	75.673	58.3	39	39
Dennd10	Q9D8N2	0.8278	0.0334707	Down	0.823	0.988	0.826	1.035	1.128	0.993	1.159	1.156	DENN domain-containing protein 10 OS=Mus musculus OX=10090 GN=Dennd10 PE=1 SV=2	40.42	18.2	4	4
Plin3	Q9DBG5	0.5592	0.0182014	Down	0.604	0.804	0.583	0.905	1.494	0.878	1.646	1.161	Perilipin-3 OS=Mus musculus OX=10090 GN=Plin3 PE=1 SV=1	47.262	37.8	10	10
Foxp4	Q9DBY0	0.6171	0.0285658	Down		0.767	0.916	0.721		1.435	1.162		Forkhead box protein P4 OS=Mus musculus OX=10090 GN=Foxp4 PE=1 SV=1	85.98	2.5	2	2
Ubl5	Q9EPV8	0.4205	0.00562808	Down	0.437	0.714	0.427	0.812	1.693	1.745	1.03	1.216	Ubiquitin-like protein 5 OS=Mus musculus OX=10090 GN=Ubl5 PE=1 SV=1	8.5468	53.4	3	3
Prmt1	Q9JIF0	0.7888	0.036857	Down	0.979	0.746	1.01	0.859	1.136	1.18	0.97	1.27	Protein arginine N-methyltransferase 1 OS=Mus musculus OX=10090 GN=Prmt1 PE=1 SV=1	42.435	62	27	27
Psmg1	Q9JK23	0.7635	0.0127876	Down	0.916	0.978	0.732	0.879	1.239	1.01	1.219	1.123	Proteasome assembly chaperone 1 OS=Mus musculus OX=10090 GN=Psmg1 PE=1 SV=1	33.104	48.1	12	12
Slc30a7	Q9JKN1	0.6334	0.0427656	Down		0.735	0.827	0.712	1.025	0.966	1.714	1.082	Zinc transporter 7 OS=Mus musculus OX=10090 GN=Slc30a7 PE=1 SV=1	41.789	6.9	2	2
Aatf	Q9JKX4	0.6591	0.0424526	Down	0.69	1.086	0.531	0.908	1.14	1.027	1.262	1.449	Protein AATF OS=Mus musculus OX=10090 GN=Aatf PE=1 SV=1	59.481	20.2	7	7
Srcin1	Q9QWI6	0.4195	0.0191674	Down	0.68	0.745		0.481	1.681		1.348		SRC kinase signaling inhibitor 1 OS=Mus musculus OX=10090 GN=Srcin1 PE=1 SV=2	134.86	5.8	4	4
Cenph	Q9QYM8	0.2819	0.0429443	Down	0.552		0.452	0.253	0.628	2.484	0.873	1.961	Centromere protein H OS=Mus musculus OX=10090 GN=Cenph PE=1 SV=1	28.135	16.6	3	3
Slit2	Q9R1B9	0.305	0.0498076	Down	0.463		0.708	0.158	0.618	1.566	2.202	1.423	Slit homolog 2 protein OS=Mus musculus OX=10090 GN=Slit2 PE=2 SV=2	168.78	5.5	5	5
Wdr46	Q9Z0H1	0.506	0.010244	Down	0.757	0.826	0.664	0.486	1.018	1.69	1.04	1.653	WD repeat-containing protein 46 OS=Mus musculus OX=10090 GN=Wdr46 PE=2 SV=1	69.047	18.6	8	8
Eif3g	Q9Z1D1	0.7188	0.0492784	Down	0.955	0.861	1.035	0.546	1.119	1.135	1.235	1.237	Eukaryotic translation initiation factor 3 subunit G OS=Mus musculus OX=10090 GN=Eif3g PE=1 SV=2	35.638	62.8	18	18
Nfs1	Q9Z1J3	0.3472	0.00195992	Down	0.434		0.506		1.259	1.538	1.264		Cysteine desulfurase, mitochondrial OS=Mus musculus OX=10090 GN=Nfs1 PE=1 SV=3	50.569	14.2	5	5
Vars1	Q9Z1Q9	0.8263	0.0016173	Down	0.872	0.915	0.931	0.95	1.09	1.156	1.167	1.026	Valine--tRNA ligase OS=Mus musculus OX=10090 GN=Vars1 PE=1 SV=1	140.21	45.2	50	50
Rlbp1	Q9Z275	0.1329	0.000125716	Down	0.193	0.177	0.155	0.423	1.737	2.183	1.738	1.475	Retinaldehyde-binding protein 1 OS=Mus musculus OX=10090 GN=Rlbp1 PE=1 SV=3	36.408	45.1	10	10
Atf2	P16951	0.001		Down					0.67	1.423		0.979	Cyclic AMP-dependent transcription factor ATF-2 OS=Mus musculus OX=10090 GN=Atf2 PE=1 SV=2	52.297	15.6	4	3
Nbr1	P97432	0.001		Down					0.908	1.034	1.798	0.226	Next to BRCA1 gene 1 protein OS=Mus musculus OX=10090 GN=Nbr1 PE=1 SV=1	109.96	6.1	3	3
C9orf78	Q3TQI7	0.001		Down						1.272	0.9	0.887	Telomere length and silencing protein 1 homolog OS=Mus musculus OX=10090 PE=1 SV=2。gene name位置显示为--，吴敏改为C9orf78。Involved in the regulation of telomeric heterochromatin assembly and control of telomere length.	33.543	18	4	4
Nin	Q61043	0.001		Down						1.32	1.271	0.42	Ninein OS=Mus musculus OX=10090 GN=Nin PE=1 SV=4	243.72	1.6	3	3
Kazn	Q69ZS8	0.001		Down					1.725	0.776	0.747	0.771	Kazrin OS=Mus musculus OX=10090 GN=Kazn PE=1 SV=2	86.716	4.5	2	2
Tatdn1	Q6P8M1	0.001		Down					1.765		0.209	1.081	Putative deoxyribonuclease TATDN1 OS=Mus musculus OX=10090 GN=Tatdn1 PE=1 SV=1	33.365	17.6	4	4
Ctdspl2	Q8BG15	0.001		Down						1.22	0.622	1.255	CTD small phosphatase-like protein 2 OS=Mus musculus OX=10090 GN=Ctdspl2 PE=1 SV=1	52.812	5.2	2	2
Slc7a6	Q8BGK6	0.001		Down						0.777	1.521	0.735	Y+L amino acid transporter 2 OS=Mus musculus OX=10090 GN=Slc7a6 PE=1 SV=1	56.77	8.9	3	2
Ift74	Q8BKE9	0.001		Down						1.172	0.584	1.349	Intraflagellar transport protein 74 homolog OS=Mus musculus OX=10090 GN=Ift74 PE=1 SV=2	69.301	15	7	7
Inpp5b	Q8K337	0.001		Down					1.742	1.094	0.472	0.711	Type II inositol 1,4,5-trisphosphate 5-phosphatase OS=Mus musculus OX=10090 GN=Inpp5b PE=1 SV=1	112.76	5.7	4	4
CXorf56	Q8VDP2	0.001		Down					0.905	1.091		1.08	UPF0428 protein CXorf56 homolog OS=Mus musculus OX=10090 PE=1 SV=1；gene name位置显示为--，吴敏改为CXorf56	25.594	10.4	2	2
Mmtag2	Q99LX5	0.001		Down					1.035		1.113	0.887	Multiple myeloma tumor-associated protein 2 homolog OS=Mus musculus OX=10090 GN=Mmtag2 PE=2 SV=1	29.298	10.4	2	2
Yju2	Q9D6J3	0.001		Down					1.066	0.944	0.785	1.28	Splicing factor YJU2 OS=Mus musculus OX=10090 GN=Yju2 PE=1 SV=1	35.988	10.8	2	2
Rabgef1	Q9JM13	0.001		Down					1.228		1.144	0.638	Rab5 GDP/GTP exchange factor OS=Mus musculus OX=10090 GN=Rabgef1 PE=1 SV=1	56.868	8.4	3	3
