# Supplementary material for: VIRMA-mediated m6A modification is essential for active ribosome biogenesis
Source: Research Square preprint supplement (doi:10.21203/rs.3.rs-3604242/v1), 2023-12-11
Supplement: Supplementary file 3 [file b2ea280b779d5ef1920a6aa9.xlsx]

## Sheet: m6A_Peak_Annotation 19230 peaks
Peak_ID	name	chr	chromStart	chromEnd	score	strand	thickStart	thickEnd	itemRgb	blockCount	blockSizes	blockStarts	ReadsCount.input.Control	ReadsCount.IP.Control	ReadsCount.input.Treated	ReadsCount.IP.Treated	ModLog2FC_control	ModLog2FC_treated	DiffModLog2FC	pvalue	padj	OverlapGene	Symbol	Priority
14833	peak_14833	chr14	111681153	111682228	31.9181	+	111681153	111682228	0	1	1075	0	418	19124	862	11916	6.25114	3.84494	-2.33412	1.30684e-14	2.4643e-10	ENSMUST00000042767	Slitrk5	LastExon
11	peak_11	chr1	9546082	9547032	23.5789	+	9546082	9547032	0	1	950	0	1148	25409	2246	19556	5.49536	3.53876	-1.88106	3.68107e-11	7.98088e-08	ENSMUST00000072079	Rrs1	LastExon
1758	peak_1758	chr2	148675511	148676011	23.5789	+	148675511	148676011	0	1	500	0	309	12616	655	8249	6.5646	4.37763	-2.09927	3.37388e-11	7.98088e-08	ENSMUST00000047177	Nxt1	LastExon
3230	peak_3230	chr3	137626042	137626492	23.5789	+	137626042	137626492	0	1	450	0	63	1070	229	874	5.3036	2.61022	-2.578	3.80909e-11	7.98088e-08	ENSMUST00000053855	Ddit4l	LastExon
7586	peak_7586	chr7	78907247	78907572	23.5789	+	78907247	78907572	0	1	325	0	599	6822	1003	4826	4.35617	2.46332	-1.81908	2.86598e-11	7.98088e-08	ENSMUST00000123824	Aen	UTR5
9371	peak_9371	chr8	70650235	70650560	23.5789	-	70650235	70650560	0	1	325	0	232	2946	456	1963	4.49326	2.27852	-2.12794	2.01327e-11	7.98088e-08	ENSMUST00000211715	Pgpep1	UTR3
14831	peak_14831	chr14	111675614	111680553	23.5789	+	111675614	111680553	0	2	1091616	0,3323	503	8608	901	6729	5.16311	3.36525	-1.73185	2.82546e-11	7.98088e-08	ENSMUST00000042767	Slitrk5	UTR5
16954	peak_16954	chr17	12967395	12967895	23.5789	-	12967395	12967895	0	1	500	0	618	11143	1233	7278	5.41689	3.3869	-1.95447	1.05419e-11	7.98088e-08	ENSMUST00000007007	Wtap	UTR3
18608	peak_18608	chr19	45005213	45005738	23.5789	-	45005213	45005738	0	1	525	0	363	4482	809	3157	4.80558	2.61766	-2.09997	3.67329e-11	7.98088e-08	ENSMUST00000097715	Mrpl43	UTR3
1599	peak_1599	chr2	119038338	119039013	22.068	+	119038338	119039013	0	1	675	0	186	9342	380	5665	6.71187	4.37406	-2.23756	1.30455e-10	2.27445e-07	ENSMUST00000028796	Rpusd2	LastExon
7170	peak_7170	chr6	134717672	134719047	22.068	-	134717672	134719047	0	1	1375	0	725	18374	1007	8798	5.75313	3.63701	-2.02579	1.32677e-10	2.27445e-07	ENSMUST00000204083	Dusp16	UTR3
7585	peak_7585	chr7	78902585	78905922	21.3534	+	78902585	78905922	0	2	245,80	0,3257	225	3674	532	3218	4.36786	2.18878	-2.08343	2.37511e-10	3.73229e-07	ENSMUST00000138167	Aen	LastExon
152	peak_152	chr1	63302817	63303342	21.3528	+	63302817	63303342	0	1	525	0	360	3936	600	2040	4.68972	2.5486	-2.04519	3.21468e-10	3.73396e-07	ENSMUST00000029025	Zdbf2	LastExon
604	peak_604	chr1	33776453	33777003	21.3528	-	33776453	33777003	0	1	550	0	594	14054	1016	10384	5.7535	4.00751	-1.6751	3.28187e-10	3.73396e-07	ENSMUST00000139143	Zfp451	UTR3
4755	peak_4755	chr4	132186636	132205520	21.3528	-	132186636	132205520	0	2	3111389	0,17495	3066	69969	4594	44167	5.75908	4.09002	-1.61109	2.76467e-10	3.73396e-07	ENSMUST00000102570	Ythdf2	UTR3
15303	peak_15303	chr15	78973432	78976506	21.3528	+	78973432	78976506	0	2	860,40	0,3034	376	8190	556	6042	4.38151	2.64711	-1.66728	3.36625e-10	3.73396e-07	ENSMUST00000109690	Triobp	Exon
17763	peak_17763	chr18	80222255	80222730	21.3528	+	80222255	80222730	0	1	475	0	574	7230	1038	5203	4.58345	2.62532	-1.87475	3.08191e-10	3.73396e-07	ENSMUST00000145963	Txnl4a	LastExon
11363	peak_11363	chr10	59950199	59950874	21.3075	-	59950199	59950874	0	1	675	0	1202	15925	1642	10693	4.05087	2.29314	-1.68533	3.67782e-10	3.85293e-07	ENSMUST00000020308	Ddit4	UTR3
14518	peak_14518	chr13	119712443	119712718	21.1843	-	119712443	119712718	0	1	275	0	39	730	118	458	5.37462	2.52912	-2.70521	4.67329e-10	4.1964e-07	ENSMUST00000178142	Nim1k	LastExon
15057	peak_15057	chr14	65930903	65931578	21.1843	-	65930903	65931578	0	1	675	0	130	4214	269	3208	5.86714	3.77313	-1.99992	4.65426e-10	4.1964e-07	ENSMUST00000042046	Scara3	Exon
17674	peak_17674	chr18	56575541	56580272	21.1843	+	56575541	56580272	0	2	507,93	0,4638	1113	25394	1791	16352	5.69789	3.85449	-1.76135	4.57571e-10	4.1964e-07	ENSMUST00000008445	Phax	Exon
416	peak_416	chr1	156065093	156065993	20.7172	+	156065093	156065993	0	1	900	0	253	12068	735	14227	6.77309	4.91673	-1.77633	6.76796e-10	5.80106e-07	ENSMUST00000060404	Tor1aip2	LastExon
6203	peak_6203	chr5	137501512	137501987	20.5419	-	137501512	137501987	0	1	475	0	157	2968	358	2089	4.9523	2.60743	-2.23281	7.98968e-10	6.55049e-07	ENSMUST00000031728	Pop7	UTR3
13832	peak_13832	chr13	15724937	15726987	20.5271	+	15724937	15726987	0	1	2050	0	2771	79752	4035	45100	5.91081	3.95246	-1.87011	8.42287e-10	6.61792e-07	ENSMUST00000110510	Gli3	LastExon
7872	peak_7872	chr7	141067947	141070446	20.4877	+	141067947	141070446	0	2	814,36	0,2463	828	22101	1113	14610	4.72217	2.97235	-1.67532	9.01675e-10	6.80115e-07	ENSMUST00000209546	B4galnt4	UTR5
7061	peak_7061	chr6	116134019	116134344	20.454	-	116134019	116134344	0	1	325	0	378	2651	503	1485	4.02892	2.253	-1.6987	9.59944e-10	6.96218e-07	ENSMUST00000204637	Tmcc1	UTR3
15361	peak_15361	chr15	87757361	87758336	20.2448	+	87757361	87758336	0	1	975	0	392	21070	569	14753	6.67891	5.00043	-1.6065	1.15236e-09	8.04817e-07	ENSMUST00000068088	Fam19a5	UTR3
7584	peak_7584	chr7	78899505	78902235	20.1458	+	78899505	78902235	0	2	194,6	0,2724	60	1130	237	854	5.24451	2.20271	-2.8816	1.32565e-09	8.61994e-07	ENSMUST00000172017	Aen	UTR5
8208	peak_8208	chr7	51860976	51861751	20.1458	-	51860976	51861751	0	1	775	0	237	10802	455	7368	6.24108	4.08137	-2.05778	1.28744e-09	8.61994e-07	ENSMUST00000169357	Fancf	UTR3
7568	peak_7568	chr7	73409425	73418342	19.9556	+	73409425	73418342	0	2	3241026	0,7891	2364	45637	2738	26464	4.52396	2.80715	-1.64146	1.57024e-09	9.83483e-07	ENSMUST00000139780	Rgma	LastExon
12625	peak_12625	chr11	59486844	59487769	19.9556	-	59486844	59487769	0	1	925	0	597	7659	999	6326	4.07977	2.33439	-1.66882	1.6168e-09	9.83483e-07	ENSMUST00000101150	Zkscan17	UTR3
13020	peak_13020	chr11	113727399	113727899	19.8485	-	113727399	113727899	0	1	500	0	459	6716	744	6118	4.89523	3.44337	-1.39442	1.85368e-09	1.05924e-06	ENSMUST00000053536	Cdc42ep4	UTR3
17675	peak_17675	chr18	56586964	56587314	19.8485	+	56586964	56587314	0	1	350	0	319	5223	537	3148	5.2504	3.25307	-1.9034	1.8415e-09	1.05924e-06	ENSMUST00000008445	Phax	LastExon
3860	peak_3860	chr4	48540567	48561471	19.4709	+	48540567	48561471	0	5	1,76,451,44,628	0,9354,11812,19379,20276	1998	34012	2735	20715	4.99011	3.18217	-1.72446	2.48127e-09	1.37616e-06	ENSMUST00000132360	Msantd3	UTR5
1293	peak_1293	chr2	28469609	28470059	19.4666	+	28469609	28470059	0	1	450	0	337	7565	594	5899	5.22253	3.36806	-1.76556	2.61145e-09	1.38024e-06	ENSMUST00000146332	Mrps2	UTR5
7121	peak_7121	chr6	122456036	122456411	19.4666	-	122456036	122456411	0	1	375	0	709	6288	995	3909	4.23306	2.48974	-1.66448	2.70822e-09	1.38024e-06	ENSMUST00000204731	Rimklb	UTR3
9035	peak_9035	chr8	109939872	109940222	19.4666	+	109939872	109940222	0	1	350	0	70	2159	143	1432	5.80548	3.52831	-2.1614	2.65916e-09	1.38024e-06	ENSMUST00000034175	Phlpp2	LastExon
15991	peak_15991	chr16	18501236	18538469	19.1998	+	18501236	18538469	0	2	422,78	0,37155	59	3531	136	2573	6.70712	4.39538	-2.18566	3.34648e-09	1.66065e-06	ENSMUST00000146673	Rtl10	LastExon
382	peak_382	chr1	136627041	136628066	19.1896	+	136627041	136628066	0	1	1025	0	437	17747	737	12232	6.57862	4.96493	-1.54208	3.4589e-09	1.67242e-06	ENSMUST00000112046	Zfp281	LastExon
5988	peak_5988	chr5	110774808	110775058	19.1748	-	110774808	110775058	0	1	250	0	247	1822	407	1217	3.38296	1.36469	-1.91891	3.66318e-09	1.68966e-06	ENSMUST00000170468	Pus1	Exon
19026	peak_19026	chrX	60891594	60892119	19.1748	-	60891594	60892119	0	1	525	0	1019	30840	1331	17008	5.06585	3.08184	-1.88636	3.67376e-09	1.68966e-06	ENSMUST00000135107	Sox3	UTR3
2358	peak_2358	chr2	115863288	115864488	19.1691	-	115863288	115864488	0	1	1200	0	4148	110476	4512	53631	5.96925	4.48017	-1.43279	3.95832e-09	1.69641e-06	ENSMUST00000074285	Meis2	UTR3
3603	peak_3603	chr3	108391675	108392675	19.1691	-	108391675	108392675	0	1	1000	0	1290	62450	1323	36036	6.22763	4.70361	-1.45778	3.88064e-09	1.69641e-06	ENSMUST00000090558	Celsr2	UTR3
4176	peak_4176	chr4	133591478	133591703	19.1691	+	133591478	133591703	0	1	225	0	51	1894	126	1160	6.44827	3.92648	-2.38491	3.93095e-09	1.69641e-06	ENSMUST00000030661	Gpn2	UTR3
3524	peak_3524	chr3	95988753	95989553	18.8965	-	95988753	95989553	0	1	800	0	2082	67456	2936	49356	5.65363	4.01589	-1.56274	4.89024e-09	2.04923e-06	ENSMUST00000123006	Plekho1	UTR3
16837	peak_16837	chr17	55510306	55510581	18.7549	+	55510306	55510581	0	1	275	0	77	1700	109	649	5.71109	3.42669	-2.16333	5.51449e-09	2.26058e-06	ENSMUST00000025000	St6gal2	LastExon
6587	peak_6587	chr6	108664628	108665653	18.648	+	108664628	108665653	0	1	1025	0	211	9931	312	5739	6.47051	4.46378	-1.90543	6.06749e-09	2.43436e-06	ENSMUST00000204550	Bhlhe40	UTR5
5353	peak_5353	chr5	111417361	111455043	18.2784	+	111417361	111455043	0	2	4522428	0,37254	9940	177426	11181	135848	3.99565	2.71375	-1.23446	8.00622e-09	3.14528e-06	ENSMUST00000094463	Mn1	UTR5
2536	peak_2536	chr2	151969522	151970497	18.2264	-	151969522	151970497	0	1	975	0	929	26649	1338	20760	5.16475	3.55271	-1.53974	8.78751e-09	3.26063e-06	ENSMUST00000109863	Fam110a	UTR3
2588	peak_2588	chr2	156872981	156873231	18.2264	-	156872981	156873231	0	1	250	0	72	932	176	629	4.95702	2.61289	-2.21503	8.8186e-09	3.26063e-06	ENSMUST00000109561	Sla2	UTR3
12512	peak_12512	chr11	21995388	21995963	18.2264	-	21995388	21995963	0	1	575	0	369	9441	508	4337	5.85306	3.72181	-2.0125	8.5166e-09	3.26063e-06	ENSMUST00000172395	Otx1	UTR3
3584	peak_3584	chr3	105678269	105679269	18.1393	-	105678269	105679269	0	1	1000	0	532	10578	834	7402	5.56013	4.00108	-1.49066	9.73476e-09	3.46355e-06	ENSMUST00000090680	Ddx20	UTR3
14832	peak_14832	chr14	111680628	111680978	18.1393	+	111680628	111680978	0	1	350	0	94	1916	203	1367	5.24123	2.9633	-2.15245	9.58612e-09	3.46355e-06	ENSMUST00000042767	Slitrk5	LastExon
1391	peak_1391	chr2	38368940	38369465	17.7517	+	38368940	38369465	0	1	525	0	3628	49262	4573	21582	4.96881	2.93735	-1.92287	1.31209e-08	4.53097e-06	ENSMUST00000000253	Lhx2	LastExon
4182	peak_4182	chr4	134523177	134523702	17.7517	+	134523177	134523702	0	1	525	0	93	3230	214	1907	6.19581	3.62524	-2.4225	1.33114e-08	4.53097e-06	ENSMUST00000105866	Aunip	LastExon
13021	peak_13021	chr11	113727974	113750744	17.7517	-	113727974	113750744	0	3	1691,44,15	0,11304,22755	2124	39535	3097	36141	4.4239	3.01852	-1.34385	1.34557e-08	4.53097e-06	ENSMUST00000053536	Cdc42ep4	UTR3
8126	peak_8126	chr7	35049896	35050771	17.6492	-	35049896	35050771	0	1	875	0	1282	34925	1527	21703	5.96934	4.5945	-1.31309	1.47051e-08	4.86479e-06	ENSMUST00000070191	Cebpg	UTR3
10697	peak_10697	chr9	108572862	108573012	17.5664	-	108572862	108573012	0	1	150	0	378	2100	639	1581	3.1676	1.31225	-1.7599	1.5847e-08	5.15217e-06	ENSMUST00000068700	Wdr6	UTR3
15629	peak_15629	chr15	75901249	75903672	17.4799	-	75901249	75903672	0	2	6994	0,1429	782	8439	1003	6054	3.53914	1.96533	-1.49799	1.71162e-08	5.47052e-06	ENSMUST00000141475	Eef1d	LastExon
10880	peak_10880	chr10	43511543	43512343	17.4156	+	43511543	43512343	0	1	800	0	483	16447	601	10326	5.5144	3.82874	-1.60122	1.81996e-08	5.71983e-06	ENSMUST00000167488	Bend3	LastExon
12306	peak_12306	chr11	106073179	106073554	17.3933	+	106073179	106073554	0	1	375	0	42	1276	94	662	6.0299	3.37721	-2.4939	1.87912e-08	5.80894e-06	ENSMUST00000002048	Taco1	LastExon
17243	peak_17243	chr17	47601155	47601655	17.3	-	47601155	47601655	0	1	500	0	273	6115	402	3969	4.97508	3.07737	-1.79546	2.03746e-08	6.19685e-06	ENSMUST00000024783	Bysl	UTR3
4333	peak_4333	chr4	155823465	155823915	17.2019	+	155823465	155823915	0	1	450	0	1764	19004	2483	13840	4.28925	2.67654	-1.53244	2.21602e-08	6.63294e-06	ENSMUST00000126346	Ccnl2	UTR3
9311	peak_9311	chr8	48232087	48236538	17.0451	-	48232087	48236538	0	2	511249	0,3202	1051	17335	1205	9914	5.25536	3.75337	-1.42956	2.50971e-08	7.39461e-06	ENSMUST00000190840	Tenm3	Exon
6098	peak_6098	chr5	123653493	123653918	17.043	-	123653493	123653918	0	1	425	0	456	4361	568	2929	4.09944	2.55569	-1.46709	2.55264e-08	7.4054e-06	ENSMUST00000149410	Clip1	Exon
4100	peak_4100	chr4	126096772	126098541	16.9796	+	126096772	126098541	0	2	37713	0,1056	152	3674	308	3476	5.46607	3.70385	-1.66964	2.70837e-08	7.73814e-06	ENSMUST00000179323	Lsm10	UTR5
17928	peak_17928	chr18	46504920	46524757	16.9272	-	46504920	46524757	0	2	1469656	0,19181	1535	51461	2221	34567	6.30966	4.82542	-1.41199	2.85116e-08	8.02451e-06	ENSMUST00000036226	Fem1c	UTR3
10890	peak_10890	chr10	53108481	53108531	16.9157	+	53108481	53108531	0	1	50	0	198	1126	252	469	3.71305	1.63852	-1.95884	2.91672e-08	8.08833e-06	ENSMUST00000105473	Slc35f1	UTR3
9521	peak_9521	chr8	106009615	106010340	16.8843	-	106009615	106010340	0	1	725	0	152	4242	309	2939	5.94278	3.83623	-1.98542	3.02484e-08	8.26658e-06	ENSMUST00000058579	Ddx28	UTR3
9257	peak_9257	chr8	27123856	27124381	16.8432	-	27123856	27124381	0	1	525	0	141	3248	254	2339	5.05523	3.02606	-1.91504	3.1574e-08	8.50558e-06	ENSMUST00000033877	Brf2	UTR3
11665	peak_11665	chr10	127055960	127056885	16.7171	-	127055960	127056885	0	1	925	0	436	11933	511	8071	5.00803	3.4899	-1.44469	3.495e-08	9.28242e-06	ENSMUST00000040307	March9	UTR3
5937	peak_5937	chr5	98185295	98185975	16.7167	-	98185295	98185975	0	2	618,57	0,623	610	23596	718	11757	4.66022	2.76723	-1.7836	3.59354e-08	9.28467e-06	ENSMUST00000205851	A730035I17Rik	UTR3
14972	peak_14972	chr14	54568693	54568893	16.7167	-	54568693	54568893	0	1	200	0	122	1171	254	746	4.24988	1.96209	-2.15268	3.59432e-08	9.28467e-06	ENSMUST00000226463	Ajuba	UTR3
4427	peak_4427	chr4	43446611	43447736	16.7068	-	43446611	43447736	0	1	1125	0	590	14038	967	11594	4.67799	2.97289	-1.61521	3.66864e-08	9.3486e-06	ENSMUST00000098104	Cd72	UTR3
6189	peak_6189	chr5	136231713	136231913	16.648	-	136231713	136231913	0	1	200	0	76	1319	129	730	3.8408	1.49221	-2.20653	3.87284e-08	9.73734e-06	ENSMUST00000196447	Sh2b2	Exon
18815	peak_18815	chrX	99147414	99148014	16.5862	+	99147414	99148014	0	1	600	0	1611	15479	2119	11041	3.99133	2.43047	-1.48338	4.09624e-08	1.01635e-05	ENSMUST00000052839	Efnb1	LastExon
2948	peak_2948	chr3	81212751	81213276	16.5153	+	81212751	81213276	0	1	525	0	84	3306	166	1996	6.54414	4.53117	-1.89487	4.38686e-08	1.06755e-05	ENSMUST00000129285	Pdgfc	UTR3
4568	peak_4568	chr4	97568382	97568782	16.5153	-	97568382	97568782	0	1	400	0	604	12490	669	3545	5.51126	3.35186	-2.03158	4.41583e-08	1.06755e-05	ENSMUST00000148653	E130114P18Rik	UTR3
18588	peak_18588	chr19	41846727	41847777	16.5098	-	41846727	41847777	0	1	1050	0	372	10034	477	7542	4.6945	3.18145	-1.43782	4.48974e-08	1.07168e-05	ENSMUST00000059231	Frat2	UTR3
17437	peak_17437	chr18	24004586	24004661	16.4731	+	24004586	24004661	0	1	75	0	120	762	205	393	3.87872	1.64894	-2.09562	4.66367e-08	1.09928e-05	ENSMUST00000074941	Zfp35	UTR3
6860	peak_6860	chr6	48024262	48024737	16.46	-	48024262	48024737	0	1	475	0	110	6432	190	4375	6.15185	4.05766	-1.96511	4.76494e-08	1.10929e-05	ENSMUST00000095944	Zfp777	UTR3
13938	peak_13938	chr13	49383124	49383724	16.4502	+	49383124	49383724	0	1	600	0	353	9005	390	4133	5.12948	3.14528	-1.87006	4.85651e-08	1.11682e-05	ENSMUST00000048544	Bicd2	LastExon
13110	peak_13110	chr11	120373925	120374475	16.4408	-	120373925	120374475	0	1	550	0	166	2114	312	1898	3.66704	1.85947	-1.70745	4.99286e-08	1.12412e-05	ENSMUST00000154826	Faap100	UTR3
17990	peak_17990	chr18	67490983	67491383	16.4408	-	67490983	67491383	0	1	400	0	593	3571	582	1827	3.64325	2.12197	-1.44437	5.00748e-08	1.12412e-05	ENSMUST00000224799	Spire1	UTR3
12636	peak_12636	chr11	60864451	60865076	16.3848	-	60864451	60865076	0	1	625	0	459	14984	700	11846	6.11477	4.57162	-1.46597	5.26784e-08	1.16865e-05	ENSMUST00000168218	Tmem11	UTR3
1744	peak_1744	chr2	144393924	144400756	16.3775	+	144393924	144400756	0	2	454,71	0,6761	540	8720	903	7023	4.88482	3.19411	-1.60263	5.61046e-08	1.1746e-05	ENSMUST00000147747	Kat14	Exon
4233	peak_4233	chr4	143418890	143419690	16.3775	+	143418890	143419690	0	1	800	0	128	3474	290	2703	6.00086	3.95382	-1.926	5.43165e-08	1.1746e-05	ENSMUST00000037356	Pramef8	LastExon
5770	peak_5770	chr5	31157265	31158165	16.3775	-	31157265	31158165	0	2	502,23	0,877	349	5230	453	3260	4.96234	3.31794	-1.55637	5.6684e-08	1.1746e-05	ENSMUST00000201423	Gtf3c2	UTR3
5775	peak_5775	chr5	31205062	31206370	16.3775	-	31205062	31206370	0	2	67333	0,975	2711	11416	3478	8464	2.85407	1.38805	-1.39395	5.55199e-08	1.1746e-05	ENSMUST00000201407	Ppm1g	Exon
8816	peak_8816	chr8	70699538	70700613	16.3775	+	70699538	70700613	0	1	1075	0	3671	108759	4691	91874	4.7273	3.40985	-1.25934	5.65162e-08	1.1746e-05	ENSMUST00000116172	Gm11175	UTR3
16615	peak_16615	chr17	24895948	24896423	16.3775	+	24895948	24896423	0	1	475	0	347	6011	592	4263	4.5951	2.64763	-1.83541	5.64062e-08	1.1746e-05	ENSMUST00000146923	Mapk8ip3	UTR3
4762	peak_4762	chr4	132459155	132459955	16.3368	-	132459155	132459955	0	1	800	0	200	9071	381	7215	6.69537	4.86196	-1.72929	5.8946e-08	1.2082e-05	ENSMUST00000102567	Med18	UTR3
11031	peak_11031	chr10	80189254	80189554	16.325	+	80189254	80189554	0	1	300	0	318	5302	438	3245	5.07567	3.30815	-1.66835	6.00736e-08	1.21807e-05	ENSMUST00000003154	Efna2	UTR3
348	peak_348	chr1	133066473	133067298	16.3215	+	133066473	133067298	0	1	825	0	622	16915	760	10660	5.51118	3.88585	-1.53866	6.15152e-08	1.22104e-05	ENSMUST00000124934	Pik3c2b	UTR5
7981	peak_7981	chr7	16496672	16497797	16.3215	-	16496672	16497797	0	1	1125	0	2371	52037	2998	36767	5.14346	3.62606	-1.43878	6.09756e-08	1.22104e-05	ENSMUST00000171937	Arhgap35	UTR3
7120	peak_7120	chr6	122453286	122453561	16.2059	-	122453286	122453561	0	1	275	0	188	6372	274	3366	6.32205	4.49995	-1.71839	6.73499e-08	1.32294e-05	ENSMUST00000068242	Rimklb	UTR3
13204	peak_13204	chr12	49384392	49386217	16.1902	+	49384392	49386217	0	1	1825	0	16881	382618	16686	231854	4.53559	3.09377	-1.3696	6.87969e-08	1.33743e-05	ENSMUST00000021333	Foxg1	UTR5
154	peak_154	chr1	63304742	63305292	16.1898	+	63304742	63305292	0	1	550	0	483	4147	649	2448	4.2425	2.8899	-1.28493	7.0232e-08	1.33774e-05	ENSMUST00000029025	Zdbf2	LastExon
6418	peak_6418	chr6	47906297	47906872	16.1898	+	47906297	47906872	0	1	575	0	154	3369	222	2125	5.14334	3.26504	-1.7695	7.02277e-08	1.33774e-05	ENSMUST00000061890	Zfp282	UTR3
1916	peak_1916	chr2	172377916	172380969	16.1768	+	172377916	172380969	0	2	90610	0,2443	299	9024	427	6306	5.53431	3.80314	-1.63608	7.15872e-08	1.34992e-05	ENSMUST00000116375	Cstf1	LastExon
10405	peak_10405	chr9	52126627	52168103	16.1542	-	52126627	52168103	0	3	75,752,73	0,17047,41403	1218	19504	1489	12401	5.19851	3.73112	-1.39205	7.41705e-08	1.37121e-05	ENSMUST00000165519	Zc3h12c	Exon
16895	peak_16895	chr17	81001070	81001595	16.1542	+	81001070	81001595	0	1	525	0	426	15635	490	7120	6.44123	4.68226	-1.66442	7.36436e-08	1.37121e-05	ENSMUST00000025092	Tmem178	LastExon
17024	peak_17024	chr17	24895746	24896271	16.1538	-	24895746	24896271	0	1	525	0	295	5834	518	4110	5.06359	3.10219	-1.84554	7.49189e-08	1.3716e-05	ENSMUST00000146923	Mapk8ip3	UTR3
13495	peak_13495	chr12	12936445	12937320	16.0929	-	12936445	12937320	0	1	875	0	2979	49793	3168	23253	5.23283	3.50855	-1.62923	7.89061e-08	1.4307e-05	ENSMUST00000130990	Mycn	UTR3
13265	peak_13265	chr12	72794226	72794276	16.0013	+	72794226	72794276	0	1	50	0	92	661	151	310	3.88562	1.45558	-2.27377	8.48861e-08	1.52447e-05	ENSMUST00000021514	Ppm1a	UTR3
5856	peak_5856	chr5	49961000	49961450	15.989	-	49961000	49961450	0	1	450	0	475	3185	591	2171	3.87898	2.43545	-1.36978	8.71149e-08	1.53754e-05	ENSMUST00000030971	Adgra3	LastExon
16602	peak_16602	chr17	24471389	24471589	15.989	+	24471389	24471589	0	1	200	0	210	1550	357	1155	3.89552	2.10276	-1.69559	8.72444e-08	1.53754e-05	ENSMUST00000234216	Pgp	UTR5
18194	peak_18194	chr19	10199451	10200826	15.9825	+	10199451	10200826	0	1	1375	0	2293	39516	3209	25224	4.88813	3.07304	-1.70784	8.84573e-08	1.54448e-05	ENSMUST00000142241	Fen1	UTR3
13840	peak_13840	chr13	21363663	21366676	15.8949	+	21363663	21366676	0	2	388,62	0,2951	326	3700	455	2330	4.63054	2.90414	-1.62758	9.48685e-08	1.64122e-05	ENSMUST00000099720	Zscan12	Exon
16491	peak_16491	chr16	97949734	97950884	15.8736	-	97949734	97950884	0	1	1150	0	422	12561	720	10427	5.91498	4.24868	-1.57322	9.71575e-08	1.66555e-05	ENSMUST00000232187	Zbtb21	UTR3
10272	peak_10272	chr9	21288837	21289012	15.7742	-	21288837	21289012	0	1	175	0	99	933	198	595	4.36692	2.15206	-2.08071	1.05039e-07	1.78444e-05	ENSMUST00000086374	Cdkn2d	UTR3
869	peak_869	chr1	131128440	131129215	15.7266	-	131128440	131129215	0	1	775	0	193	6760	357	4613	6.33856	4.37799	-1.85137	1.09542e-07	1.84431e-05	ENSMUST00000016670	Dyrk3	UTR3
14182	peak_14182	chr13	34075000	34075475	15.7201	-	34075000	34075475	0	1	475	0	1563	63104	1488	25545	5.75626	3.87076	-1.77267	1.11018e-07	1.85263e-05	ENSMUST00000056427	Tubb2a	LastExon
5774	peak_5774	chr5	31202842	31203092	15.7002	-	31202842	31203092	0	1	250	0	694	4395	967	2947	3.39305	1.66208	-1.62774	1.14551e-07	1.87835e-05	ENSMUST00000031032	Ppm1g	UTR3
8130	peak_8130	chr7	35547634	35547959	15.7002	-	35547634	35547959	0	1	325	0	100	1897	170	946	5.49244	3.30449	-2.04842	1.13759e-07	1.87835e-05	ENSMUST00000142930	Nudt19	UTR3
7217	peak_7217	chr7	4920554	4921054	15.6699	+	4920554	4921054	0	1	500	0	206	6065	338	5427	4.87917	3.26138	-1.52873	1.18002e-07	1.91824e-05	ENSMUST00000116354	Zfp628	LastExon
4524	peak_4524	chr4	70222530	70222830	15.5384	-	70222530	70222830	0	1	300	0	70	1240	107	581	5.16117	2.83128	-2.17693	1.30375e-07	2.10126e-05	ENSMUST00000144099	Cdk5rap2	UTR3
477	peak_477	chr1	175901010	175901260	15.5037	+	175901010	175901260	0	1	250	0	98	1277	175	648	4.30914	1.76476	-2.37271	1.35832e-07	2.15242e-05	ENSMUST00000039725	Exo1	Exon
7126	peak_7126	chr6	124431433	124431583	15.5037	-	124431433	124431583	0	1	150	0	24	366	76	236	4.25344	1.14628	-2.88731	1.35368e-07	2.15242e-05	ENSMUST00000124998	Clstn3	UTR3
11812	peak_11812	chr11	46440800	46441325	15.4918	+	46440800	46441325	0	1	525	0	362	4402	653	2901	4.76158	3.11835	-1.54985	1.38109e-07	2.17027e-05	ENSMUST00000181212	2310031A07Rik	UTR3
1743	peak_1743	chr2	144371729	144375407	15.4899	+	144371729	144375407	0	3	64,665,21	0,1461,3657	760	9698	1037	8060	4.74488	3.43554	-1.24399	1.39445e-07	2.17315e-05	ENSMUST00000028911	Kat14	UTR5
14184	peak_14184	chr13	34127982	34128872	15.4627	-	34127982	34128872	0	2	549,1	0,889	16985	366715	19054	234597	4.82773	3.33378	-1.41342	1.43264e-07	2.21436e-05	ENSMUST00000075774	Tubb2b	LastExon
4633	peak_4633	chr4	117890170	117890445	15.3365	-	117890170	117890445	0	1	275	0	94	2031	138	1149	4.89195	2.79067	-1.96469	1.58926e-07	2.41683e-05	ENSMUST00000183773	Dph2	UTR3
6944	peak_6944	chr6	85133927	85134127	15.3365	-	85133927	85134127	0	1	200	0	222	2218	426	1690	3.7733	1.73204	-1.91441	1.5833e-07	2.41683e-05	ENSMUST00000174286	Spr	UTR3
11227	peak_11227	chr10	127744439	127744789	15.3024	+	127744439	127744789	0	1	350	0	221	1959	301	1220	4.22705	2.538	-1.59067	1.64044e-07	2.4747e-05	ENSMUST00000054287	Zbtb39	UTR3
14207	peak_14207	chr13	41311540	41312040	15.293	-	41311540	41312040	0	1	500	0	372	14735	563	8963	6.53477	4.74735	-1.67746	1.66432e-07	2.4908e-05	ENSMUST00000163623	Nedd9	UTR3
16994	peak_16994	chr17	23760417	23760931	15.2859	-	23760417	23760931	0	2	50325	0,189	828	6348	1045	5027	3.41397	2.03784	-1.30639	1.68582e-07	2.50311e-05	ENSMUST00000086325	Flywch1	Exon
8346	peak_8346	chr7	99924206	99924956	15.2693	-	99924206	99924956	0	1	750	0	220	3494	314	2257	5.17282	3.46163	-1.60996	1.71878e-07	2.53212e-05	ENSMUST00000080817	Rnf169	UTR3
3830	peak_3830	chr4	43446755	43447905	15.2589	+	43446755	43447905	0	1	1150	0	715	14602	1099	12427	4.58495	3.01803	-1.47995	1.74477e-07	2.55047e-05	ENSMUST00000098104	Cd72	UTR3
3170	peak_3170	chr3	115928889	115929214	15.2294	+	115928889	115929214	0	1	325	0	136	3199	217	1916	5.78703	3.95346	-1.72109	1.79553e-07	2.60312e-05	ENSMUST00000043342	Dph5	UTR3
13839	peak_13839	chr13	21192297	21192547	15.2294	+	21192297	21192547	0	1	250	0	495	4892	814	3457	4.31236	2.47525	-1.72405	1.8222e-07	2.60312e-05	ENSMUST00000139287	Trim27	UTR3
14029	peak_14029	chr13	73514366	73514691	15.2294	+	73514366	73514691	0	1	325	0	428	12752	537	7339	5.94071	4.23488	-1.60747	1.81003e-07	2.60312e-05	ENSMUST00000147566	Lpcat1	UTR3
2130	peak_2130	chr2	30967013	30967263	15.2259	-	30967013	30967263	0	1	250	0	172	1762	242	1100	4.3928	2.64633	-1.6425	1.84048e-07	2.60947e-05	ENSMUST00000143199	Tor1a	UTR3
2852	peak_2852	chr3	36987169	36987594	15.1973	+	36987169	36987594	0	1	425	0	211	2946	322	1729	5.04512	3.35	-1.59488	1.90559e-07	2.66176e-05	ENSMUST00000211820	4932438A13Rik	Exon
15443	peak_15443	chr15	102281452	102281744	15.1973	+	102281452	102281744	0	1	292	0	97	5527	206	5355	6.54935	4.7421	-1.69688	1.90306e-07	2.66176e-05	ENSMUST00000051341	Mfsd5	LastExon
18520	peak_18520	chr19	10199306	10200631	15.1944	-	10199306	10200631	0	1	1325	0	2135	39294	3005	25180	5.13629	3.34871	-1.67534	1.92353e-07	2.66705e-05	ENSMUST00000142241	Fen1	UTR3
14279	peak_14279	chr13	58127028	58127728	15.1917	-	58127028	58127728	0	1	700	0	9117	93187	11076	78983	3.16259	1.92348	-1.17849	1.94131e-07	2.67206e-05	ENSMUST00000007980	Hnrnpa0	UTR3
7982	peak_7982	chr7	16549133	16562983	15.1761	-	16549133	16562983	0	2	741526	0,12324	3742	40752	4594	29200	4.65879	3.3898	-1.20579	1.97674e-07	2.70111e-05	ENSMUST00000171937	Arhgap35	Exon
18368	peak_18368	chr19	46084169	46084519	15.1452	+	46084169	46084519	0	1	350	0	454	6615	570	3961	5.10241	3.63274	-1.39245	2.0342e-07	2.75963e-05	ENSMUST00000223683	Nolc1	LastExon
13466	peak_13466	chr12	113188972	113189520	15.0489	+	113188972	113189520	0	1	548	0	92	8978	164	7533	6.62076	4.80549	-1.69643	2.19027e-07	2.95014e-05	ENSMUST00000058491	Tmem121	LastExon
14627	peak_14627	chr14	46853902	46854193	15.0249	+	46853902	46854193	0	1	291	0	48	1546	147	1376	6.11492	3.73204	-2.2184	2.24289e-07	2.99959e-05	ENSMUST00000068532	Cgrrf1	LastExon
3555	peak_3555	chr3	101043006	101043506	15.0056	-	101043006	101043506	0	1	500	0	1154	18874	1396	9611	4.95458	3.09674	-1.74139	2.28914e-07	3.03987e-05	ENSMUST00000102694	Ptgfrn	UTR3
2756	peak_2756	chr2	180905601	180912094	15.0005	-	180905601	180912094	0	2	671408	0,5085	1609	26688	2287	21996	5.07012	3.6777	-1.31818	2.3201e-07	3.05068e-05	ENSMUST00000108876	Ythdf1	Exon
13071	peak_13071	chr11	117815650	117815950	15.0005	-	117815650	117815950	0	1	300	0	217	4622	385	2809	4.99852	2.74691	-2.10014	2.32963e-07	3.05068e-05	ENSMUST00000141939	Tk1	UTR3
15976	peak_15976	chr16	17452261	17483767	14.9751	+	17452261	17483767	0	3	527466107	0,16631,31399	1452	15502	1691	10510	4.07127	2.60336	-1.38623	2.38741e-07	3.10478e-05	ENSMUST00000231629	Crkl	UTR5
12561	peak_12561	chr11	46440536	46447108	14.9511	-	46440536	46447108	0	2	635,40	0,6532	375	4801	649	3203	4.92641	3.21638	-1.60704	2.44423e-07	3.15691e-05	ENSMUST00000181212	2310031A07Rik	UTR3
7122	peak_7122	chr6	122472587	122486189	14.9102	-	122472587	122486189	0	2	176,99	0,13503	1019	4884	1324	4588	2.70207	1.5138	-1.13133	2.53182e-07	3.2478e-05	ENSMUST00000204045	Rimklb	LastExon
3538	peak_3538	chr3	97204161	97204486	14.8462	-	97204161	97204486	0	1	325	0	333	2369	357	1164	4.07368	2.55373	-1.43287	2.66468e-07	3.39513e-05	ENSMUST00000046521	Bcl9	UTR3
11729	peak_11729	chr11	6596253	6596744	14.8437	+	6596253	6596744	0	1	491	0	262	8482	370	6036	5.58902	3.91955	-1.57054	2.68734e-07	3.40102e-05	ENSMUST00000109721	Ccm2	LastExon
18203	peak_18203	chr19	11774397	11774822	14.8292	+	11774397	11774822	0	1	425	0	327	4505	520	2814	5.0123	3.16886	-1.72343	2.73271e-07	3.43538e-05	ENSMUST00000237728	Mrpl16	UTR5
5835	peak_5835	chr5	38673633	38674758	14.8129	-	38673633	38674758	0	1	1125	0	1028	21932	1210	14293	5.52991	4.12279	-1.33404	2.79218e-07	3.4743e-05	ENSMUST00000180214	Zfp518b	LastExon
16422	peak_16422	chr16	64766009	64766809	14.8129	-	64766009	64766809	0	1	800	0	390	12724	579	8087	6.26489	4.74274	-1.43616	2.80052e-07	3.4743e-05	ENSMUST00000076991	4930453N24Rik	UTR3
13523	peak_13523	chr12	31487128	31488203	14.7705	-	31487128	31488203	0	1	1075	0	464	13964	635	9671	6.10047	4.61782	-1.39875	2.90302e-07	3.57793e-05	ENSMUST00000101499	Cbll1	UTR3
15220	peak_15220	chr15	39437147	39437797	14.7455	+	39437147	39437797	0	1	650	0	778	10795	949	6991	5.01051	3.58147	-1.34904	2.97301e-07	3.6404e-05	ENSMUST00000228867	Rims2	UTR5
93	peak_93	chr1	42697145	42700207	14.7242	+	42697145	42700207	0	1	3062	0	10329	513121	12416	427391	5.90109	4.63739	-1.19926	3.03685e-07	3.69457e-05	ENSMUST00000054883	Pou3f3	UTR5
7399	peak_7399	chr7	28815981	28816331	14.712	+	28815981	28816331	0	1	350	0	606	6628	719	3743	4.25361	2.52227	-1.62497	3.08244e-07	3.726e-05	ENSMUST00000174755	Hnrnpl	UTR5
9234	peak_9234	chr8	22177144	22177469	14.6833	-	22177144	22177469	0	1	325	0	200	2841	300	1888	5.07537	3.49086	-1.49046	3.16458e-07	3.80092e-05	ENSMUST00000046916	Ckap2	Exon
2438	peak_2438	chr2	127140046	127142146	14.67	-	127140046	127142146	0	1	2100	0	490	10184	841	8693	5.3404	3.68642	-1.55478	3.2143e-07	3.8362e-05	ENSMUST00000154021	Itpripl1	UTR3
5622	peak_5622	chr5	142722276	142722490	14.6697	+	142722276	142722490	0	1	214	0	114	1696	157	869	4.26239	2.1193	-1.99664	3.23529e-07	3.83697e-05	ENSMUST00000058418	Slc29a4	UTR3
14952	peak_14952	chr14	52009374	52009599	14.6343	-	52009374	52009599	0	1	225	0	336	3796	462	2517	3.24599	1.45509	-1.67866	3.33647e-07	3.93224e-05	ENSMUST00000228051	Zfp219	LastExon
5991	peak_5991	chr5	112214577	112214777	14.626	-	112214577	112214777	0	1	200	0	2691	8947	2499	5786	2.63619	1.45837	-1.12062	3.37667e-07	3.95489e-05	ENSMUST00000181535	Miat	UTR3
4073	peak_4073	chr4	123054287	123054512	14.5687	+	123054287	123054512	0	1	225	0	173	1346	203	638	4.06869	2.15343	-1.78934	3.53521e-07	4.11502e-05	ENSMUST00000147165	Trit1	UTR5
2971	peak_2971	chr3	88055100	88055775	14.5621	+	88055100	88055775	0	1	675	0	1265	23743	1985	18000	5.23019	3.56873	-1.55915	3.57352e-07	4.13411e-05	ENSMUST00000193398	Gpatch4	LastExon
14208	peak_14208	chr13	41315903	41316453	14.5572	-	41315903	41316453	0	1	550	0	319	5444	439	3324	5.06833	3.27504	-1.69416	3.60749e-07	4.14796e-05	ENSMUST00000163623	Nedd9	Exon
12470	peak_12470	chr11	5715351	5718151	14.5244	-	5715351	5718151	0	1	2800	0	1020	31439	1377	26959	5.38537	4.01497	-1.301	3.71311e-07	4.24352e-05	ENSMUST00000118076	Urgcp	UTR3
16963	peak_16963	chr17	15367578	15367903	14.5184	-	15367578	15367903	0	1	325	0	483	10480	643	5251	5.68105	3.94909	-1.62305	3.75112e-07	4.26114e-05	ENSMUST00000140784	Dll1	UTR3
5500	peak_5500	chr5	127707071	127707546	14.5146	+	127707071	127707546	0	1	475	0	52	1278	99	650	5.74364	3.24254	-2.31895	3.82907e-07	4.27247e-05	ENSMUST00000118139	Glt1d1	UTR3
7475	peak_7475	chr7	44444901	44463347	14.5146	+	44444901	44463347	0	2	3112339	0,16107	5062	165405	5929	134214	5.00287	3.74372	-1.19402	3.82477e-07	4.27247e-05	ENSMUST00000058667	Lrrc4b	LastExon
11314	peak_11314	chr10	33943740	33949408	14.5146	-	33943740	33949408	0	2	20480	0,5188	149	6310	260	4296	6.59573	5.01211	-1.48687	3.80079e-07	4.27247e-05	ENSMUST00000218222	Zup1	LastExon
3873	peak_3873	chr4	55010994	55011969	14.4959	+	55010994	55011969	0	1	975	0	3295	27887	3042	14652	4.09211	2.67304	-1.33924	3.90176e-07	4.32797e-05	ENSMUST00000030131	Zfp462	UTR5
14519	peak_14519	chr13	119727561	119738191	14.4949	-	119727561	119738191	0	2	962,63	0,10567	122	4078	236	3856	5.93216	4.23224	-1.59171	3.92756e-07	4.33111e-05	ENSMUST00000178973	Nim1k	UTR3
14087	peak_14087	chr13	104297355	104307249	14.4755	+	104297355	104307249	0	2	171,29	0,9865	138	1546	179	591	4.61336	2.70533	-1.78254	4.004e-07	4.38974e-05	ENSMUST00000224303	Adamts6	Exon
870	peak_870	chr1	131129440	131129815	14.4584	-	131129440	131129815	0	1	375	0	162	2363	314	1552	4.88615	2.71071	-2.0239	4.07533e-07	4.44211e-05	ENSMUST00000016670	Dyrk3	LastExon
5267	peak_5267	chr5	98185054	98186979	14.4521	+	98185054	98186979	0	1	1925	0	1631	39820	1834	24111	4.42335	2.79754	-1.52618	4.11694e-07	4.46167e-05	ENSMUST00000112959	Prdm8	LastExon
4632	peak_4632	chr4	117873528	117873903	14.4267	-	117873528	117873903	0	1	375	0	213	4319	285	2768	4.87629	3.09863	-1.6655	4.24974e-07	4.54075e-05	ENSMUST00000106421	B4galt2	UTR3
6124	peak_6124	chr5	125414530	125414955	14.4267	-	125414530	125414955	0	1	425	0	96	2438	140	1417	5.83234	3.97174	-1.73877	4.25187e-07	4.54075e-05	ENSMUST00000169485	Dhx37	UTR3
9469	peak_9469	chr8	89028772	89030622	14.4267	-	89028772	89030622	0	2	46679	0,1171	1695	28668	1741	17209	5.10073	3.70659	-1.31596	4.26215e-07	4.54075e-05	ENSMUST00000034090	Sall1	Exon
18450	peak_18450	chr19	4612134	4613576	14.4197	-	4612134	4613576	0	2	504421	0,1021	855	29292	1187	22498	4.96505	3.41071	-1.46187	4.30706e-07	4.56282e-05	ENSMUST00000053597	Lrfn4	LastExon
5449	peak_5449	chr5	122864156	122867151	14.4154	+	122864156	122867151	0	3	238,105,32	0,2645,2963	468	5262	592	3038	4.55478	2.83695	-1.60948	4.34437e-07	4.57663e-05	ENSMUST00000198602	Rnf34	LastExon
19089	peak_19089	chrX	102144865	102145215	14.3907	-	102144865	102145215	0	1	350	0	109	1967	208	1159	5.41682	3.31623	-1.95288	4.44402e-07	4.65561e-05	ENSMUST00000056904	Ercc6l	LastExon
6419	peak_6419	chr6	47907047	47907222	14.3637	+	47907047	47907222	0	1	175	0	19	494	72	292	5.95757	2.93377	-2.78951	4.55291e-07	4.74333e-05	ENSMUST00000061890	Zfp282	UTR3
12072	peak_12072	chr11	76250034	76250509	14.342	+	76250034	76250509	0	1	475	0	98	4162	167	2623	6.41196	4.36302	-1.90739	4.64742e-07	4.81519e-05	ENSMUST00000155526	Mrm3	UTR5
3585	peak_3585	chr3	107326159	107332744	14.3228	-	107326159	107332744	0	2	1452530	0,4055	3979	118523	5983	105842	5.6555	4.21063	-1.36399	4.75518e-07	4.87986e-05	ENSMUST00000197769	Rbm15	UTR3
8647	peak_8647	chr8	12395669	12398094	14.3228	+	12395669	12398094	0	1	2425	0	2143	73830	2781	66510	4.86651	3.60173	-1.20797	4.81335e-07	4.87986e-05	ENSMUST00000180353	Sox1	UTR5
8782	peak_8782	chr8	61384902	61394091	14.3228	+	61384902	61394091	0	2	27423	0,8766	547	11638	675	7033	5.59093	4.06285	-1.43743	4.78064e-07	4.87986e-05	ENSMUST00000034060	Sh3rf1	LastExon
9516	peak_9516	chr8	105716553	105717453	14.3228	-	105716553	105717453	0	1	900	0	488	10655	642	8334	4.92833	3.48972	-1.35733	4.803e-07	4.87986e-05	ENSMUST00000013294	Gfod2	UTR3
4816	peak_4816	chr4	136653813	136655338	14.318	-	136653813	136655338	0	1	1525	0	1633	31341	1985	22514	4.99711	3.57452	-1.34092	4.85535e-07	4.89611e-05	ENSMUST00000059287	Ephb2	UTR3
8743	peak_8743	chr8	36106533	36147781	14.3	+	36106533	36147781	0	4	761587611480	0,22470,32818,39768	1341	33225	1522	22380	5.21688	3.76698	-1.36551	4.94247e-07	4.95746e-05	ENSMUST00000110492	Prag1	LastExon
7889	peak_7889	chr7	143847301	143847526	14.2629	+	143847301	143847526	0	1	225	0	74	2262	156	1535	5.39764	3.05806	-2.16842	5.12545e-07	5.08687e-05	ENSMUST00000207143	Dhcr7	LastExon
12319	peak_12319	chr11	109395948	109396573	14.2629	+	109395948	109396573	0	1	625	0	409	14046	717	11183	6.3654	4.81967	-1.45212	5.11805e-07	5.08687e-05	ENSMUST00000020930	Gna13	LastExon
4418	peak_4418	chr4	41712032	41712557	14.216	-	41712032	41712557	0	1	525	0	223	4627	373	3672	4.82807	3.02193	-1.68674	5.35029e-07	5.25471e-05	ENSMUST00000038434	Rpp25l	UTR3
13945	peak_13945	chr13	51139470	51149412	14.216	+	51139470	51149412	0	3	140234451	0,4831,9491	2108	25441	2402	14557	4.80542	3.33846	-1.38099	5.34582e-07	5.25471e-05	ENSMUST00000223152	Spin1	UTR5
5780	peak_5780	chr5	32827050	32827375	14.2088	-	32827050	32827375	0	1	325	0	208	2608	293	1699	4.50379	2.77758	-1.61491	5.40531e-07	5.28124e-05	ENSMUST00000155392	Prr14l	Exon
8486	peak_8486	chr7	127194274	127194599	14.1364	-	127194274	127194599	0	1	325	0	1010	8626	1084	5122	3.39076	1.81073	-1.48311	5.71284e-07	5.55294e-05	ENSMUST00000205525	Cd2bp2	UTR3
655	peak_655	chr1	53346693	53347246	14.1261	-	53346693	53347246	0	2	68232	0,321	482	7217	611	4452	5.12973	3.58778	-1.44785	5.7833e-07	5.5926e-05	ENSMUST00000027264	Asnsd1	Exon
13003	peak_13003	chr11	107735031	107735206	14.1064	-	107735031	107735206	0	1	175	0	434	2014	535	1304	3.03874	1.46542	-1.47631	5.89283e-07	5.66945e-05	ENSMUST00000021066	Cacng4	LastExon
9088	peak_9088	chr8	119941332	119944146	14.0884	+	119941332	119944146	0	2	806,69	0,2745	845	27515	1160	22284	5.54671	4.07609	-1.38508	5.99721e-07	5.74058e-05	ENSMUST00000143615	Usp10	UTR5
3813	peak_3813	chr4	42715100	42715500	14.0678	+	42715100	42715500	0	1	400	0	141	1607	223	785	4.758	2.5935	-2.0081	6.11439e-07	5.82319e-05	ENSMUST00000194137	Gm21955	UTR5
13487	peak_13487	chr12	5080946	5081146	14.0655	-	5080946	5081146	0	1	200	0	73	1019	98	398	4.81777	2.46256	-2.17993	6.15504e-07	5.83244e-05	ENSMUST00000218384	Klhl29	UTR3
15792	peak_15792	chr15	89103623	89104098	14.0609	-	89103623	89104098	0	1	475	0	163	2266	245	1770	4.67554	3.06728	-1.50714	6.20603e-07	5.85136e-05	ENSMUST00000041656	Tubgcp6	Exon
770	peak_770	chr1	84912438	84912988	14.0585	-	84912438	84912988	0	1	550	0	106	3422	126	1194	5.99255	3.61669	-2.19878	6.24728e-07	5.86095e-05	ENSMUST00000027422	Slc16a14	Exon
3522	peak_3522	chr3	95763547	95765922	14.0122	-	95763547	95765922	0	1	2375	0	2099	46195	2476	31866	5.44329	4.05709	-1.30347	6.48334e-07	6.0523e-05	ENSMUST00000090791	Rprd2	UTR3
16964	peak_16964	chr17	15368178	15368718	14.0063	-	15368178	15368718	0	2	73352	0,188	1204	18244	1281	9811	4.59886	2.92251	-1.56878	6.54184e-07	6.07682e-05	ENSMUST00000014917	Dll1	Exon
17770	peak_17770	chr18	82986986	83001947	14.0041	+	82986986	83001947	0	4	1212,120,68,675	0,6083,7483,14286	1966	34471	2614	25278	4.40589	2.83129	-1.47475	6.58414e-07	6.08613e-05	ENSMUST00000071233	Zfp516	Exon
3732	peak_3732	chr4	8854951	8856757	13.97	+	8854951	8856757	0	2	563,87	0,1719	2125	20118	2481	13421	3.94973	2.44339	-1.41567	6.96415e-07	6.23183e-05	ENSMUST00000222546	Chd7	Exon
4815	peak_4815	chr4	136653088	136653263	13.97	-	136653088	136653263	0	1	175	0	702	2396	971	2386	2.64516	1.51518	-1.07398	6.81309e-07	6.23183e-05	ENSMUST00000105845	Ephb2	UTR3
7569	peak_7569	chr7	73418367	73418742	13.97	+	73418367	73418742	0	1	375	0	897	5818	1017	4123	3.22802	1.82744	-1.3189	6.97309e-07	6.23183e-05	ENSMUST00000139780	Rgma	UTR3
11342	peak_11342	chr10	42582921	42583271	13.97	-	42582921	42583271	0	1	350	0	699	7189	739	3654	3.4704	1.69064	-1.66239	6.8951e-07	6.23183e-05	ENSMUST00000019938	Nr2e1	UTR5
12513	peak_12513	chr11	21995988	21996613	13.97	-	21995988	21996613	0	1	625	0	823	16745	946	8902	4.72826	2.88064	-1.72387	6.96227e-07	6.23183e-05	ENSMUST00000172395	Otx1	UTR3
14044	peak_14044	chr13	78234788	78235163	13.97	+	78234788	78235163	0	1	375	0	317	3049	401	1418	4.50573	2.69826	-1.68647	6.83843e-07	6.23183e-05	ENSMUST00000123998	A830082K12Rik	UTR5
15791	peak_15791	chr15	89103123	89103548	13.97	-	89103123	89103548	0	1	425	0	518	4311	663	3196	3.87966	2.42861	-1.36491	6.84269e-07	6.23183e-05	ENSMUST00000041656	Tubgcp6	Exon
1041	peak_1041	chr1	163386058	163386508	13.9438	-	163386058	163386508	0	1	450	0	56	2414	109	1471	6.572	4.34285	-2.06369	7.14501e-07	6.34586e-05	ENSMUST00000186402	Gorab	UTR3
6549	peak_6549	chr6	90466740	90467115	13.9438	+	90466740	90467115	0	1	375	0	52	1589	130	1311	5.10146	2.77172	-2.15294	7.168e-07	6.34586e-05	ENSMUST00000203607	Klf15	Exon
3519	peak_3519	chr3	95326234	95327640	13.9297	-	95326234	95327640	0	3	38,29,433	0,151,973	790	7594	1106	5819	4.28402	2.81102	-1.38656	7.27229e-07	6.40811e-05	ENSMUST00000124638	Setdb1	UTR3
5995	peak_5995	chr5	112385822	112391429	13.9274	-	112385822	112391429	0	3	39114272	0,936,5335	233	4873	339	3644	4.76466	3.05178	-1.60112	7.3182e-07	6.41857e-05	ENSMUST00000031291	Asphd2	Exon
4145	peak_4145	chr4	129992115	129992590	13.8927	+	129992115	129992590	0	1	475	0	258	4255	412	4475	3.9974	2.6137	-1.30382	7.58772e-07	6.57475e-05	ENSMUST00000030571	Adgrb2	Exon
9064	peak_9064	chr8	112017954	112018629	13.8927	+	112017954	112018629	0	1	675	0	635	27399	916	18716	6.59379	5.03511	-1.45889	7.60087e-07	6.57475e-05	ENSMUST00000052138	Terf2ip	LastExon
18583	peak_18583	chr19	40550306	40550706	13.8927	-	40550306	40550706	0	1	400	0	353	9711	463	5581	6.02691	4.42104	-1.50561	7.53695e-07	6.57475e-05	ENSMUST00000025979	Aldh18a1	UTR3
12238	peak_12238	chr11	98795740	98800862	13.8657	+	98795740	98800862	0	4	864,99,224,863	0,2913,3399,4259	4250	74625	5191	58705	4.52444	3.17398	-1.27284	7.77987e-07	6.69886e-05	ENSMUST00000107487	Msl1	UTR5
4499	peak_4499	chr4	62191214	62192539	13.8523	-	62191214	62192539	0	1	1325	0	416	9929	645	7075	5.8144	4.36948	-1.35551	7.88848e-07	6.7615e-05	ENSMUST00000129511	Zfp37	LastExon
2972	peak_2972	chr3	88055825	88055993	13.8446	+	88055825	88055993	0	1	168	0	60	794	121	396	4.93027	2.39223	-2.3405	8.0748e-07	6.79761e-05	ENSMUST00000193398	Gpatch4	UTR3
10163	peak_10163	chr9	121472408	121473383	13.8446	+	121472408	121473383	0	1	975	0	1093	19665	1180	11975	4.58854	3.06596	-1.42831	8.06771e-07	6.79761e-05	ENSMUST00000210798	Trak1	UTR3
16957	peak_16957	chr17	12974998	12975423	13.8446	-	12974998	12975423	0	1	425	0	723	6259	944	3773	4.35835	2.82432	-1.43909	8.01406e-07	6.79761e-05	ENSMUST00000160781	Wtap	UTR3
18599	peak_18599	chr19	43663971	43664596	13.8446	-	43663971	43664596	0	1	625	0	399	8821	577	7291	5.1926	3.70016	-1.40136	8.07132e-07	6.79761e-05	ENSMUST00000235953	Slc25a28	UTR3
5466	peak_5466	chr5	123373227	123373477	13.8399	+	123373227	123373477	0	1	250	0	1005	6951	868	3040	3.33	1.64527	-1.5725	8.13738e-07	6.81985e-05	ENSMUST00000031391	Bcl7a	UTR3
17169	peak_17169	chr17	35835200	35835525	13.8398	-	35835200	35835525	0	1	325	0	21688	94493	22670	64450	2.61699	1.30139	-1.24131	8.17401e-07	6.82023e-05	ENSMUST00000001566	Tubb5	LastExon
5855	peak_5855	chr5	49959950	49960900	13.8386	-	49959950	49960900	0	1	950	0	1203	44789	1693	33571	6.46489	5.1114	-1.27603	8.27462e-07	6.82622e-05	ENSMUST00000030971	Adgra3	UTR3
14143	peak_14143	chr13	17717836	17718886	13.8386	-	17717836	17718886	0	1	1050	0	871	30799	1179	22024	6.38479	5.04479	-1.26326	8.25647e-07	6.82622e-05	ENSMUST00000222800	Cdk13	UTR3
15997	peak_15997	chr16	19768931	19770281	13.8386	+	19768931	19770281	0	1	1350	0	924	44475	1137	30040	6.80038	5.67291	-1.06717	8.28978e-07	6.82622e-05	ENSMUST00000119468	B3gnt5	UTR5
1772	peak_1772	chr2	151706550	151707125	13.8141	+	151706550	151707125	0	1	575	0	163	2972	193	1709	4.6191	2.85107	-1.6478	8.46833e-07	6.94292e-05	ENSMUST00000060196	Tmem74b	LastExon
6670	peak_6670	chr6	125193351	125193626	13.8125	+	125193351	125193626	0	1	275	0	477	2847	699	1802	3.81408	2.26337	-1.45261	8.55129e-07	6.95051e-05	ENSMUST00000136804	Mrpl51	UTR5
18258	peak_18258	chr19	29143315	29143740	13.8125	+	29143315	29143740	0	1	425	0	107	2396	143	1172	5.57394	3.53674	-1.89055	8.51696e-07	6.95051e-05	ENSMUST00000064393	Rcl1	UTR3
7830	peak_7830	chr7	127880145	127881470	13.798	+	127880145	127881470	0	1	1325	0	1398	32517	1605	28780	5.39405	4.36529	-0.989965	8.6749e-07	7.02071e-05	ENSMUST00000206340	Zfp646	LastExon
17220	peak_17220	chr17	46446176	46467584	13.7925	-	46446176	46467584	0	2	1541459	0,20949	1123	20367	1099	14146	4.20163	2.97219	-1.16439	8.7454e-07	7.04752e-05	ENSMUST00000047034	Ttbk1	Exon
1845	peak_1845	chr2	156873217	156873417	13.7871	+	156873217	156873417	0	1	200	0	98	1006	200	702	4.6099	2.56666	-1.89462	8.81585e-07	7.07406e-05	ENSMUST00000109561	Sla2	UTR3
4597	peak_4597	chr4	109454097	109456947	13.7817	-	109454097	109456947	0	2	325,50	0,2800	933	7402	1084	4640	4.23403	2.97032	-1.19531	8.88686e-07	7.10083e-05	ENSMUST00000064167	Rnf11	UTR3
5488	peak_5488	chr5	125454722	125455172	13.7789	+	125454722	125455172	0	1	450	0	1291	14603	1556	8822	4.71419	3.2303	-1.39088	8.96419e-07	7.11453e-05	ENSMUST00000049040	Bri3bp	LastExon
7671	peak_7671	chr7	98715237	98717137	13.7789	+	98715237	98717137	0	1	1900	0	1708	58769	2636	43573	6.35311	4.90606	-1.36146	8.97946e-07	7.11453e-05	ENSMUST00000033009	Thap12	LastExon
10660	peak_10660	chr9	106693106	106693531	13.7689	-	106693106	106693531	0	1	425	0	340	4359	352	2540	4.06316	2.50826	-1.45635	9.07963e-07	7.16379e-05	ENSMUST00000046502	Rad54l2	LastExon
8697	peak_8697	chr8	23446360	23447110	13.7501	+	23446360	23447110	0	1	750	0	2102	24759	2180	11842	4.68432	2.99957	-1.573	9.30345e-07	7.25785e-05	ENSMUST00000033952	Sfrp1	LastExon
13678	peak_13678	chr12	84171642	84173661	13.7501	-	84171642	84173661	0	2	117908	0,1111	711	28047	927	21196	5.45559	3.94178	-1.41845	9.26794e-07	7.25785e-05	ENSMUST00000220974	Elmsan1	Exon
18749	peak_18749	chrX	60548218	60548493	13.7501	+	60548218	60548493	0	1	275	0	163	2464	193	1195	3.90044	1.90134	-1.85554	9.31431e-07	7.25785e-05	ENSMUST00000117865	Gm715	UTR5
6583	peak_6583	chr6	107569197	107569647	13.7475	+	107569197	107569647	0	1	450	0	507	23346	635	10372	6.76907	4.93286	-1.70731	9.36957e-07	7.27086e-05	ENSMUST00000049285	Lrrn1	LastExon
9468	peak_9468	chr8	89027997	89028597	13.7124	-	89027997	89028597	0	1	600	0	962	24042	959	10631	5.85766	4.19625	-1.55571	9.63973e-07	7.44985e-05	ENSMUST00000034090	Sall1	UTR3
13247	peak_13247	chr12	69372724	69373599	13.6918	+	69372724	69373599	0	1	875	0	1630	56343	2549	52991	5.82691	4.41568	-1.33122	9.8185e-07	7.55704e-05	ENSMUST00000050063	Arf6	UTR5
14789	peak_14789	chr14	75321853	75323622	13.6805	+	75321853	75323622	0	2	51399	0,1370	963	19722	1023	11960	4.97229	3.48189	-1.39821	9.93647e-07	7.61674e-05	ENSMUST00000227049	Zc3h13	Exon
3539	peak_3539	chr3	97204586	97209475	13.675	-	97204586	97209475	0	3	1391261998	0,2560,3891	3547	58995	3705	43646	4.67639	3.48527	-1.12747	1.00146e-06	7.64556e-05	ENSMUST00000166341	Bcl9	UTR3
3556	peak_3556	chr3	101056580	101060961	13.663	-	101056580	101060961	0	2	75325	0,4056	774	28764	908	14647	6.18093	4.373	-1.68476	1.0139e-06	7.70932e-05	ENSMUST00000102694	Ptgfrn	Exon
1084	peak_1084	chr1	171503692	171504111	13.6623	-	171503692	171504111	0	1	419	0	133	2593	206	1950	4.47953	2.67886	-1.67551	1.01852e-06	7.71334e-05	ENSMUST00000165827	B930036N10Rik	UTR3
13064	peak_13064	chr11	116541417	116541692	13.656	-	116541417	116541692	0	1	275	0	718	5030	799	3693	3.14217	1.81177	-1.25339	1.02709e-06	7.74716e-05	ENSMUST00000134102	Ube2o	UTR3
14681	peak_14681	chr14	55548542	55549017	13.646	+	55548542	55549017	0	1	475	0	77	1760	183	1571	5.5404	3.49723	-1.89044	1.03834e-06	7.80082e-05	ENSMUST00000226664	Pck2	UTR5
6581	peak_6581	chr6	107530175	107567797	13.6424	+	107530175	107567797	0	2	68807	0,36815	879	17290	1239	10418	5.38338	3.529	-1.72422	1.04926e-06	7.82054e-05	ENSMUST00000049285	Lrrn1	UTR5
15806	peak_15806	chr15	91148608	91149133	13.6424	-	91148608	91149133	0	1	525	0	425	7751	433	3009	5.42585	3.69736	-1.60702	1.04784e-06	7.82054e-05	ENSMUST00000069511	Abcd2	UTR3
5787	peak_5787	chr5	33600350	33600725	13.621	-	33600350	33600725	0	1	375	0	279	4922	331	2768	5.21282	3.55057	-1.55977	1.06911e-06	7.93705e-05	ENSMUST00000045329	Fam53a	UTR3
4393	peak_4393	chr4	34810737	34811787	13.5829	-	34810737	34811787	0	1	1050	0	1528	54441	1823	36889	6.35697	5.28612	-1.01777	1.10455e-06	8.14975e-05	ENSMUST00000047950	Zfp292	LastExon
10404	peak_10404	chr9	52115434	52116759	13.5829	-	52115434	52116759	0	1	1325	0	1108	23009	1347	15297	5.49287	4.05005	-1.3548	1.1064e-06	8.14975e-05	ENSMUST00000165519	Zc3h12c	LastExon
6174	peak_6174	chr5	135377665	135377940	13.5671	-	135377665	135377940	0	1	275	0	312	2484	340	1387	4.01766	2.42567	-1.48715	1.12735e-06	8.23969e-05	ENSMUST00000111171	Pom121	UTR3
9011	peak_9011	chr8	107058445	107058745	13.5671	+	107058445	107058745	0	1	300	0	397	3105	472	1699	4.18827	2.58377	-1.4987	1.12716e-06	8.23969e-05	ENSMUST00000170962	Nip7	LastExon
9559	peak_9559	chr8	111711359	111713563	13.5608	-	111711359	111713563	0	3	35,90,225	0,1241,1979	650	7473	805	6310	3.77723	2.50574	-1.19907	1.13664e-06	8.27556e-05	ENSMUST00000212349	Bcar1	Exon
3874	peak_3874	chr4	55011994	55012519	13.5482	+	55011994	55012519	0	1	525	0	2220	33863	2031	18768	5.02706	3.73585	-1.21539	1.15103e-06	8.3481e-05	ENSMUST00000079605	Zfp462	Exon
10492	peak_10492	chr9	62420591	62421291	13.5327	-	62420591	62421291	0	1	700	0	1059	12163	1138	8732	4.1228	2.8474	-1.20511	1.17645e-06	8.43828e-05	ENSMUST00000048043	Coro2b	UTR3
12284	peak_12284	chr11	102605855	102606180	13.5327	+	102605855	102606180	0	1	325	0	395	2990	607	2742	2.95194	1.4704	-1.38813	1.17689e-06	8.43828e-05	ENSMUST00000057893	Fzd2	LastExon
14171	peak_14171	chr13	29909649	29910149	13.5327	-	29909649	29910149	0	1	500	0	192	5566	243	2827	6.05918	4.2537	-1.68054	1.17645e-06	8.43828e-05	ENSMUST00000102948	E2f3	UTR3
4814	peak_4814	chr4	136647788	136648613	13.5177	-	136647788	136648613	0	1	825	0	383	3429	562	3079	3.7384	2.33189	-1.32066	1.19367e-06	8.52613e-05	ENSMUST00000105845	Ephb2	UTR3
7973	peak_7973	chr7	15988687	15989337	13.5081	-	15988687	15989337	0	1	650	0	316	8080	366	5943	4.57311	3.18412	-1.30417	1.20636e-06	8.58309e-05	ENSMUST00000094821	Bicra	Exon
17208	peak_17208	chr17	46147614	46148139	13.5081	-	46147614	46148139	0	1	525	0	84	1830	164	1476	5.21425	3.25728	-1.81297	1.21074e-06	8.58309e-05	ENSMUST00000171172	Mad2l1bp	UTR3
3273	peak_3273	chr3	8664311	8664936	13.5067	-	8664311	8664936	0	1	625	0	599	17111	708	7319	5.73733	3.6578	-1.9223	1.23021e-06	8.59189e-05	ENSMUST00000042412	Hey1	UTR3
7788	peak_7788	chr7	126291832	126292232	13.5067	+	126291832	126292232	0	1	400	0	1377	20779	1317	11488	3.76384	2.26211	-1.40577	1.22402e-06	8.59189e-05	ENSMUST00000056028	Sbk1	LastExon
11147	peak_11147	chr10	96617450	96618803	13.5067	+	96617450	96618803	0	2	22528	0,825	1757	31683	1960	17484	5.41111	3.95725	-1.36374	1.22308e-06	8.59189e-05	ENSMUST00000218953	Btg1	UTR5
13795	peak_13795	chr12	111709887	111711312	13.5067	-	111709887	111711312	0	1	1425	0	1452	32680	2145	25856	5.64453	4.18998	-1.36697	1.22788e-06	8.59189e-05	ENSMUST00000160576	Bag5	UTR3
111	peak_111	chr1	55238051	55239301	13.4791	+	55238051	55239301	0	1	1250	0	176	11179	260	7962	7.16133	5.55692	-1.49826	1.25861e-06	8.75781e-05	ENSMUST00000061334	Mars2	LastExon
14957	peak_14957	chr14	52204723	52205298	13.4536	-	52204723	52205298	0	1	575	0	331	5303	373	3339	5.02927	3.59951	-1.34062	1.28571e-06	8.91349e-05	ENSMUST00000134329	Chd8	UTR3
1745	peak_1745	chr2	144406927	144407676	13.403	+	144406927	144407676	0	1	749	0	264	8537	385	6927	5.97194	4.50504	-1.37949	1.34121e-06	9.23224e-05	ENSMUST00000147747	Kat14	UTR3
3871	peak_3871	chr4	55008944	55009544	13.403	+	55008944	55009544	0	1	600	0	2006	36621	2132	21971	5.40369	4.07917	-1.23786	1.34355e-06	9.23224e-05	ENSMUST00000098070	Zfp462	Exon
11007	peak_11007	chr10	79675600	79676125	13.403	+	79675600	79676125	0	1	525	0	276	8592	396	7189	4.90973	3.39062	-1.42186	1.34638e-06	9.23224e-05	ENSMUST00000020552	Tpgs1	LastExon
12372	peak_12372	chr11	117714361	117732200	13.4003	+	117714361	117732200	0	3	91,2601,33	0,6588,17806	4975	100342	5797	76662	5.03389	3.74739	-1.21315	1.35373e-06	9.24903e-05	ENSMUST00000141115	Tnrc6c	UTR5
5771	peak_5771	chr5	31198980	31199355	13.3899	-	31198980	31199355	0	1	375	0	157	3940	212	2785	5.72208	4.17178	-1.44847	1.3685e-06	9.31621e-05	ENSMUST00000031562	Zfp513	UTR3
1807	peak_1807	chr2	153397466	153400904	13.3728	+	153397466	153400904	0	2	5341666	0,1772	2821	57396	3281	38699	5.31915	3.91539	-1.31656	1.38981e-06	9.42718e-05	ENSMUST00000109790	Asxl1	LastExon
7653	peak_7653	chr7	96910738	96911063	13.3686	+	96910738	96911063	0	1	325	0	332	5620	375	2312	5.32146	3.47389	-1.7139	1.39892e-06	9.45501e-05	ENSMUST00000107166	Tenm4	UTR3
8228	peak_8228	chr7	64871901	64872451	13.3656	-	64871901	64872451	0	1	550	0	204	10758	365	10027	6.9291	5.49505	-1.34339	1.41545e-06	9.47456e-05	ENSMUST00000094331	Nsmce3	UTR3
13729	peak_13729	chr12	99196129	99196704	13.3656	-	99196129	99196704	0	1	575	0	820	17486	1066	11740	5.50085	3.97579	-1.42545	1.41483e-06	9.47456e-05	ENSMUST00000222458	Foxn3	UTR3
17819	peak_17819	chr18	21128500	21129875	13.3656	-	21128500	21129875	0	1	1375	0	342	6860	427	4320	5.54084	4.0522	-1.39256	1.41689e-06	9.47456e-05	ENSMUST00000234115	Garem1	UTR3
9037	peak_9037	chr8	109941147	109941547	13.3635	+	109941147	109941547	0	1	400	0	79	1740	137	775	5.72705	3.30178	-2.23001	1.42396e-06	9.48823e-05	ENSMUST00000034175	Phlpp2	UTR3
9442	peak_9442	chr8	84834043	84834720	13.3598	-	84834043	84834720	0	2	281,69	0,608	413	3493	553	2334	4.03343	2.42332	-1.50412	1.43265e-06	9.5125e-05	ENSMUST00000144675	Rad23a	UTR3
12126	peak_12126	chr11	82764794	82765669	13.3564	+	82764794	82765669	0	1	875	0	537	16104	759	12048	6.12576	4.73	-1.31093	1.44107e-06	9.53482e-05	ENSMUST00000056677	Zfp830	LastExon
7720	peak_7720	chr7	105762570	105764457	13.3438	+	105762570	105764457	0	3	22,157,71	0,104,1816	629	4532	656	3432	2.69484	1.50969	-1.12015	1.45885e-06	9.61873e-05	ENSMUST00000131504	Gm15645	UTR5
4817	peak_4817	chr4	136770941	136771466	13.3211	-	136770941	136771466	0	1	525	0	577	8583	720	5689	4.16364	2.54163	-1.51274	1.48714e-06	9.77109e-05	ENSMUST00000144573	Ephb2	UTR3
3134	peak_3134	chr3	104655561	104655611	13.3175	+	104655561	104655611	0	1	50	0	269	1615	299	686	3.46873	1.46294	-1.8565	1.50327e-06	9.79569e-05	ENSMUST00000046212	Slc16a1	LastExon
5437	peak_5437	chr5	121852914	121853964	13.3175	+	121852914	121853964	0	1	1050	0	361	10334	452	7785	4.88383	3.42058	-1.37209	1.50688e-06	9.79569e-05	ENSMUST00000056654	Pheta1	LastExon
7167	peak_7167	chr6	134506336	134507629	13.3175	-	134506336	134507629	0	2	31344	0,949	1014	7519	888	3409	4.07727	2.58036	-1.39965	1.50946e-06	9.79569e-05	ENSMUST00000032322	Lrp6	Exon
9790	peak_9790	chr9	44505433	44509659	13.3175	+	44505433	44509659	0	4	672287282964	0,150,2719,3262	4339	100664	5739	92196	4.55439	3.29874	-1.1833	1.51686e-06	9.79569e-05	ENSMUST00000074989	Bcl9l	Exon
12285	peak_12285	chr11	102606230	102606805	13.3175	+	102606230	102606805	0	1	575	0	629	8495	805	6069	4.84898	3.40633	-1.35118	1.51312e-06	9.79569e-05	ENSMUST00000057893	Fzd2	LastExon
6851	peak_6851	chr6	42317736	42318436	13.303	-	42317736	42318436	0	1	700	0	349	9442	429	6243	5.27872	3.68259	-1.48553	1.54264e-06	9.89444e-05	ENSMUST00000095974	Fam131b	UTR3
12740	peak_12740	chr11	73176218	73176393	13.303	-	73176218	73176393	0	1	175	0	513	2524	694	1615	3.52694	2.08586	-1.3512	1.53937e-06	9.89444e-05	ENSMUST00000054952	Emc6	UTR3
6565	peak_6565	chr6	95122043	95122293	13.2938	+	95122043	95122293	0	1	250	0	48	1328	101	840	5.99378	4.00208	-1.843	1.55782e-06	9.95793e-05	ENSMUST00000119582	Kbtbd8	Exon
4744	peak_4744	chr4	129647579	129648029	13.2827	-	129647579	129648029	0	1	450	0	308	7739	392	5665	5.46067	4.00175	-1.36505	1.58461e-06	0.000100348	ENSMUST00000003828	Kpna6	UTR3
14517	peak_14517	chr13	119712068	119712393	13.2827	-	119712068	119712393	0	1	325	0	77	1242	134	752	5.24539	3.29886	-1.80021	1.58581e-06	0.000100348	ENSMUST00000178142	Nim1k	LastExon
16706	peak_16706	chr17	33911426	33912214	13.2827	+	33911426	33912214	0	2	643,57	0,731	421	8135	522	5903	4.68945	3.19187	-1.40058	1.57658e-06	0.000100348	ENSMUST00000170075	Daxx	Exon
8694	peak_8694	chr8	22859534	22903184	13.2612	+	22859534	22903184	0	4	98,86,914,77	0,1982,2353,43573	1859	36038	2210	30937	5.39003	4.34455	-0.993433	1.61504e-06	0.000101856	ENSMUST00000044331	Kat6a	UTR5
12305	peak_12305	chr11	106058591	106058841	13.2547	+	106058591	106058841	0	1	250	0	374	2394	429	1310	3.91192	2.45757	-1.36228	1.62775e-06	0.000102315	ENSMUST00000058438	Dcaf7	UTR3
8404	peak_8404	chr7	109933622	109933822	13.2496	-	109933622	109933822	0	1	200	0	408	2264	499	1591	3.58473	2.21895	-1.28252	1.6389e-06	0.000102673	ENSMUST00000080437	Dennd5a	Exon
1482	peak_1482	chr2	83879292	83880742	13.241	+	83879292	83880742	0	1	1450	0	1248	49774	1615	40248	6.53355	5.34652	-1.12088	1.6542e-06	0.000103289	ENSMUST00000051454	Fam171b	LastExon
18814	peak_18814	chrX	99136179	99136604	13.2385	+	99136179	99136604	0	1	425	0	1624	12314	1930	9603	2.73043	1.38189	-1.26618	1.6626e-06	0.000103471	ENSMUST00000052839	Efnb1	UTR5
6232	peak_6232	chr5	140327673	140328648	13.2143	-	140327673	140328648	0	1	975	0	218	7806	340	6608	6.03305	4.51677	-1.4156	1.70066e-06	0.000105217	ENSMUST00000031536	Mrm2	UTR3
14795	peak_14795	chr14	75525836	75526136	13.2143	+	75525836	75526136	0	1	300	0	123	2429	151	1005	4.83877	2.55076	-2.10277	1.70182e-06	0.000105217	ENSMUST00000164848	Siah3	LastExon
6767	peak_6767	chr6	13582686	13591421	13.2001	-	13582686	13591421	0	2	648152	0,8583	272	7171	450	5187	5.97145	4.39082	-1.47804	1.72439e-06	0.000106264	ENSMUST00000149123	Tmem168	UTR3
10994	peak_10994	chr10	76038987	76040187	13.1987	+	76038987	76040187	0	1	1200	0	268	8678	448	7520	6.19967	4.73573	-1.36865	1.73166e-06	0.000106365	ENSMUST00000061617	Zfp280b	LastExon
16793	peak_16793	chr17	46398744	46399819	13.1969	+	46398744	46399819	0	1	1075	0	693	11931	944	8924	5.30182	3.92104	-1.29687	1.73943e-06	0.000106495	ENSMUST00000138127	Zfp318	Exon
3520	peak_3520	chr3	95338307	95338757	13.1801	-	95338307	95338757	0	1	450	0	501	6680	613	4335	4.96138	3.61656	-1.26125	1.78962e-06	0.000107748	ENSMUST00000124638	Setdb1	UTR3
3999	peak_3999	chr4	108338343	108339043	13.1801	+	108338343	108339043	0	1	700	0	165	4890	271	3686	5.79906	4.09977	-1.57824	1.78181e-06	0.000107748	ENSMUST00000131656	Coa7	LastExon
7802	peak_7802	chr7	127233510	127236181	13.1801	+	127233510	127236181	0	2	7918	0,1753	1126	23090	1391	16264	4.66463	3.12116	-1.43971	1.79418e-06	0.000107748	ENSMUST00000056232	Zfp553	UTR5
9348	peak_9348	chr8	69909368	69909943	13.1801	-	69909368	69909943	0	1	575	0	638	16853	768	10399	5.59017	3.98436	-1.49781	1.78843e-06	0.000107748	ENSMUST00000212478	Gatad2a	UTR3
13221	peak_13221	chr12	54067871	54069271	13.1801	+	54067871	54069271	0	1	1400	0	508	15476	679	14742	4.97485	3.72992	-1.17436	1.77592e-06	0.000107748	ENSMUST00000223057	Npas3	LastExon
14953	peak_14953	chr14	52161268	52161693	13.1801	-	52161268	52161693	0	1	425	0	1054	8931	1123	4725	4.31354	2.80922	-1.41228	1.79148e-06	0.000107748	ENSMUST00000046709	Supt16	UTR3
13788	peak_13788	chr12	110976202	110976852	13.1632	-	110976202	110976852	0	1	650	0	76	5168	141	3590	6.61559	4.51618	-1.93829	1.82104e-06	0.000109014	ENSMUST00000135131	Ankrd9	UTR3
6267	peak_6267	chr5	143301944	143308041	13.1401	-	143301944	143308041	0	3	59,40,426	0,4821,5671	608	20588	719	13169	5.48176	3.87473	-1.49737	1.85636e-06	0.000110777	ENSMUST00000160498	E130309D02Rik	UTR3
2143	peak_2143	chr2	32707383	32708033	13.1317	-	32707383	32708033	0	1	650	0	711	15680	951	11241	5.48086	3.97432	-1.40613	1.88858e-06	0.00011142	ENSMUST00000120105	Cdk9	UTR3
2978	peak_2978	chr3	88568178	88569253	13.1317	+	88568178	88569253	0	1	1075	0	1633	26002	1730	16256	5.06146	3.70741	-1.26832	1.87805e-06	0.00011142	ENSMUST00000008748	Ubqln4	LastExon
9298	peak_9298	chr8	47186447	47192909	13.1317	-	47186447	47192909	0	3	125,54,1071	0,5185,5391	2964	45811	2972	30532	4.90088	3.67189	-1.15825	1.88616e-06	0.00011142	ENSMUST00000209337	Stox2	UTR3
9372	peak_9372	chr8	70699537	70700080	13.1317	-	70699537	70700080	0	1	543	0	2062	67355	2536	56506	4.50879	3.29404	-1.144	1.89077e-06	0.00011142	ENSMUST00000116172	Gm11175	UTR3
9982	peak_9982	chr9	90163002	90171511	13.1315	+	90163002	90171511	0	2	312,38	0,8471	71	1261	157	1372	4.20476	2.42278	-1.65222	1.90255e-06	0.000111436	ENSMUST00000134996	Adamts7	UTR5
13726	peak_13726	chr12	98688291	98689241	13.1315	-	98688291	98689241	0	1	950	0	320	5701	453	4397	4.52345	2.94158	-1.48151	1.90878e-06	0.000111436	ENSMUST00000221148	Ptpn21	UTR3
19217	peak_19217	chrX	166457677	166458227	13.1315	-	166457677	166458227	0	1	550	0	397	4649	617	3086	4.80496	3.22091	-1.47597	1.9073e-06	0.000111436	ENSMUST00000112091	Rab9	UTR3
4442	peak_4442	chr4	44994716	45011006	13.1308	-	44994716	45011006	0	2	670,55	0,16235	346	7562	485	5828	5.24504	3.71516	-1.42629	1.91777e-06	0.000111493	ENSMUST00000131991	Zbtb5	LastExon
4955	peak_4955	chr4	154340834	154342009	13.1308	-	154340834	154342009	0	1	1175	0	987	19014	1312	17526	4.3396	3.05243	-1.21062	1.92749e-06	0.000111493	ENSMUST00000141164	Prdm16	UTR3
5118	peak_5118	chr5	33876992	33877067	13.1308	+	33876992	33877067	0	1	75	0	236	1401	291	699	3.65391	1.78626	-1.72844	1.92489e-06	0.000111493	ENSMUST00000142080	Nsd2	UTR3
265	peak_265	chr1	92858478	92858953	13.1287	+	92858478	92858953	0	1	475	0	1920	17713	1976	10600	3.42214	1.93483	-1.38905	1.94711e-06	0.000111649	ENSMUST00000045970	Gpc1	LastExon
1547	peak_1547	chr2	104256896	104258534	13.1287	+	104256896	104258534	0	2	37338	0,1300	101	2537	148	1567	5.53519	3.65102	-1.74091	1.94795e-06	0.000111649	ENSMUST00000150450	Gm13883	UTR5
11787	peak_11787	chr11	32499272	32516687	13.1287	+	32499272	32516687	0	2	189598	0,16817	1508	18924	1967	14824	4.79657	3.50401	-1.21473	1.94111e-06	0.000111649	ENSMUST00000051053	Ubtd2	LastExon
9285	peak_9285	chr8	40551194	40551694	13.1076	-	40551194	40551694	0	1	500	0	213	5457	230	2280	5.91741	4.21058	-1.58418	1.98271e-06	0.000113297	ENSMUST00000048898	Mtmr7	UTR3
9588	peak_9588	chr8	119598499	119599074	13.1012	-	119598499	119599074	0	1	575	0	105	2910	148	2038	5.02297	3.2694	-1.62599	1.99758e-06	0.000113802	ENSMUST00000147964	Taf1c	UTR3
6862	peak_6862	chr6	48042086	48044624	13.095	-	48042086	48044624	0	2	69781	0,1757	566	14838	739	11560	5.52749	4.12151	-1.31618	2.01224e-06	0.000114292	ENSMUST00000147281	Zfp777	LastExon
12376	peak_12376	chr11	117760696	117761221	13.0714	+	117760696	117761221	0	1	525	0	516	6832	547	4208	4.19525	2.7008	-1.39513	2.05381e-06	0.000116179	ENSMUST00000141115	Tnrc6c	UTR5
15150	peak_15150	chr14	118235006	118236981	13.0714	-	118235006	118236981	0	1	1975	0	1862	37563	1935	29781	3.94177	2.844	-1.03605	2.0578e-06	0.000116179	ENSMUST00000170662	Sox21	LastExon
6928	peak_6928	chr6	82726974	82727349	13.0604	-	82726974	82727349	0	1	375	0	163	4551	204	2207	5.8325	3.83544	-1.84211	2.10276e-06	0.000117063	ENSMUST00000000642	Hk2	UTR3
7737	peak_7737	chr7	111056058	111056108	13.0604	+	111056058	111056108	0	1	50	0	75	474	113	254	3.69251	1.60951	-1.91882	2.0869e-06	0.000117063	ENSMUST00000005749	Ctr9	UTR3
8000	peak_8000	chr7	19356848	19357448	13.0604	-	19356848	19357448	0	1	600	0	658	6148	830	4198	4.12833	2.62015	-1.4074	2.08868e-06	0.000117063	ENSMUST00000047036	Cd3eap	UTR3
8672	peak_8672	chr8	15011399	15029871	13.0604	+	15011399	15029871	0	2	793221	0,15251	1856	61486	2309	52424	5.11042	3.80571	-1.22872	2.1033e-06	0.000117063	ENSMUST00000192473	Gm37844	UTR3
10000	peak_10000	chr9	99583488	99584163	13.0604	+	99583488	99584163	0	1	675	0	271	7414	357	4486	6.0074	4.41934	-1.48069	2.11433e-06	0.000117063	ENSMUST00000139796	Dbr1	UTR3
13774	peak_13774	chr12	107910927	107911227	13.0604	-	107910927	107911227	0	1	300	0	312	3459	291	1609	4.34947	2.70311	-1.53005	2.11203e-06	0.000117063	ENSMUST00000066060	Bcl11b	UTR3
18536	peak_18536	chr19	15905752	15906052	13.0604	-	15905752	15906052	0	1	300	0	796	9921	922	4391	4.87502	3.01259	-1.72399	2.1169e-06	0.000117063	ENSMUST00000161707	Psat1	UTR3
4763	peak_4763	chr4	132492431	132492481	13.0601	-	132492431	132492481	0	1	50	0	17	264	71	235	4.66105	1.68833	-2.71107	2.12986e-06	0.000117093	ENSMUST00000030724	Sesn2	UTR3
15060	peak_15060	chr14	67015756	67016481	13.0601	-	67015756	67016481	0	1	725	0	584	5915	647	3557	4.58874	3.32334	-1.19107	2.12399e-06	0.000117093	ENSMUST00000225251	Ppp2r2a	UTR3
3876	peak_3876	chr4	55013069	55013394	13.0435	+	55013069	55013394	0	1	325	0	1865	9748	1879	7556	3.15375	2.0857	-1.00608	2.1608e-06	0.000118448	ENSMUST00000079605	Zfp462	Exon
14929	peak_14929	chr14	34414233	34414608	13.0315	-	34414233	34414608	0	1	375	0	500	17189	665	9287	6.28005	4.76499	-1.41524	2.18515e-06	0.000119436	ENSMUST00000049005	Bmpr1a	UTR3
10455	peak_10455	chr9	57626871	57627271	13.0158	-	57626871	57627271	0	1	400	0	293	6381	373	4250	5.11696	3.51075	-1.49354	2.22105e-06	0.000120742	ENSMUST00000215396	Csk	UTR3
18349	peak_18349	chr19	45007807	45009386	13.0158	+	45007807	45009386	0	2	568107	0,1472	318	7209	383	4891	5.28256	3.77544	-1.40554	2.22186e-06	0.000120742	ENSMUST00000026227	Twnk	Exon
190	peak_190	chr1	74679590	74680390	13.006	+	74679590	74680390	0	1	800	0	1027	14207	1099	8980	4.76094	3.36861	-1.30447	2.24858e-06	0.000121567	ENSMUST00000113678	Ttll4	Exon
6842	peak_6842	chr6	39463152	39463327	13.006	-	39463152	39463327	0	1	175	0	151	807	275	806	3.2077	1.6663	-1.43565	2.24993e-06	0.000121567	ENSMUST00000036877	Dennd2a	UTR3
799	peak_799	chr1	93320804	93321279	13.0058	-	93320804	93321279	0	1	475	0	147	1419	246	1058	4.29897	2.52806	-1.63985	2.25658e-06	0.000121578	ENSMUST00000139028	Pask	UTR3
1061	peak_1061	chr1	167226089	167226389	13.0051	-	167226089	167226389	0	1	300	0	446	8300	575	5014	5.37859	3.73845	-1.52828	2.2742e-06	0.000121639	ENSMUST00000195443	Uck2	UTR3
8316	peak_8316	chr7	92644586	92644711	13.0051	-	92644586	92644711	0	1	125	0	105	700	194	424	3.82717	2.09362	-1.60671	2.27707e-06	0.000121639	ENSMUST00000151177	Pcf11	LastExon
14206	peak_14206	chr13	41310090	41310815	13.0051	-	41310090	41310815	0	1	725	0	406	8659	594	5071	5.65505	4.01566	-1.5227	2.26626e-06	0.000121639	ENSMUST00000163623	Nedd9	UTR3
5666	peak_5666	chr5	147110976	147111251	13.0033	+	147110976	147111251	0	1	275	0	623	9712	821	6827	5.1504	3.76164	-1.30332	2.28644e-06	0.000121795	ENSMUST00000202444	Polr1d	UTR3
2359	peak_2359	chr2	116064640	116064995	12.9998	-	116064640	116064995	0	2	81194	0,161	574	5681	557	3017	4.50296	3.10843	-1.30441	2.29836e-06	0.000122085	ENSMUST00000110908	Meis2	Exon
9934	peak_9934	chr9	72617135	72618460	12.9976	+	72617135	72618460	0	1	1325	0	1032	15225	1456	10971	5.13599	3.7316	-1.31335	2.30833e-06	0.00012227	ENSMUST00000093820	Rfx7	LastExon
8088	peak_8088	chr7	29845615	29846090	12.9764	-	29845615	29846090	0	1	475	0	56	865	106	601	5.16561	3.22719	-1.78763	2.34917e-06	0.000124085	ENSMUST00000145098	Zfp940	UTR3
10517	peak_10517	chr9	65699993	65702643	12.9723	-	65699993	65702643	0	3	36367372	0,828,2278	1756	10080	1707	7109	3.14329	1.98207	-1.09596	2.36244e-06	0.000124437	ENSMUST00000159109	Zfp609	Exon
6682	peak_6682	chr6	128373345	128374245	12.963	+	128373345	128374245	0	1	900	0	1039	22966	1217	17995	5.02755	3.72562	-1.219	2.38437e-06	0.000125243	ENSMUST00000112148	Foxm1	LastExon
12951	peak_12951	chr11	102799578	102800853	12.9394	-	102799578	102800853	0	1	1275	0	2060	59960	2654	40320	6.11629	4.75803	-1.27199	2.43044e-06	0.000127308	ENSMUST00000092567	Gjc1	UTR3
2839	peak_2839	chr3	32519677	32520677	12.9391	+	32519677	32520677	0	1	1000	0	559	24679	730	17784	6.70113	5.39812	-1.2227	2.43774e-06	0.000127336	ENSMUST00000193789	Zfp639	LastExon
6126	peak_6126	chr5	127596263	127596638	12.9313	-	127596263	127596638	0	1	375	0	69	3039	150	2221	6.27177	4.05482	-2.03472	2.45765e-06	0.000128022	ENSMUST00000153832	Slc15a4	UTR3
3389	peak_3389	chr3	61364899	61365949	12.9292	-	61364899	61365949	0	1	1050	0	1118	21176	1403	17339	4.41315	3.07696	-1.24601	2.46874e-06	0.000128206	ENSMUST00000066298	B430305J03Rik	UTR5
3879	peak_3879	chr4	55079358	55081636	12.9292	+	55079358	55081636	0	2	29971	0,1307	4093	63589	3783	28997	5.20149	3.82228	-1.29037	2.50549e-06	0.000128206	ENSMUST00000079605	Zfp462	LastExon
5080	peak_5080	chr5	30893256	30893606	12.9292	+	30893256	30893606	0	1	350	0	322	4899	327	2680	4.77665	3.21881	-1.44928	2.50572e-06	0.000128206	ENSMUST00000201918	Agbl5	UTR5
6492	peak_6492	chr6	81959219	81959419	12.9292	+	81959219	81959419	0	1	200	0	48	574	125	372	4.79104	2.31586	-2.26355	2.4959e-06	0.000128206	ENSMUST00000032124	Mrpl19	UTR3
11803	peak_11803	chr11	43717803	43720558	12.9292	+	43717803	43720558	0	2	37338	0,2417	368	6905	542	4358	5.47006	3.93563	-1.42421	2.47895e-06	0.000128206	ENSMUST00000130467	Pwwp2a	UTR5
14734	peak_14734	chr14	61213912	61215012	12.9292	+	61213912	61215012	0	1	1100	0	450	10652	558	6352	5.8007	4.43048	-1.28334	2.48471e-06	0.000128206	ENSMUST00000119943	Sacs	LastExon
17993	peak_17993	chr18	68268061	68268436	12.9292	-	68268061	68268436	0	1	375	0	59	1554	125	1000	5.93118	3.95432	-1.82125	2.50878e-06	0.000128206	ENSMUST00000042852	Fam210a	UTR3
10628	peak_10628	chr9	101107091	101107491	12.9146	-	101107091	101107491	0	1	400	0	154	1944	242	1134	4.91257	3.12637	-1.65171	2.54693e-06	0.000129517	ENSMUST00000066773	Ppp2r3a	UTR3
13139	peak_13139	chr12	3500128	3500628	12.9146	+	3500128	3500628	0	1	500	0	321	5953	440	4412	5.17206	3.66666	-1.40302	2.54817e-06	0.000129517	ENSMUST00000092003	Asxl2	UTR3
1389	peak_1389	chr2	37796580	37798330	12.9138	+	37796580	37798330	0	1	1750	0	1024	12745	1303	8649	4.50329	2.94055	-1.45392	2.56319e-06	0.000129582	ENSMUST00000050372	Crb2	LastExon
12624	peak_12624	chr11	59485519	59485694	12.9138	-	59485519	59485694	0	1	175	0	104	1784	195	1442	5.33289	3.76084	-1.45918	2.55751e-06	0.000129582	ENSMUST00000101150	Zkscan17	UTR3
4749	peak_4749	chr4	131769106	131769456	12.9107	-	131769106	131769456	0	1	350	0	317	4585	320	2220	4.07433	2.26462	-1.67359	2.58263e-06	0.000129868	ENSMUST00000105987	Ptpru	UTR3
6812	peak_6812	chr6	32149700	32150500	12.9107	-	32149700	32150500	0	1	800	0	653	6630	600	3419	4.45552	3.05795	-1.30654	2.57906e-06	0.000129868	ENSMUST00000115096	Plxna4	UTR3
2272	peak_2272	chr2	84725697	84725922	12.9101	-	84725697	84725922	0	1	225	0	67	1972	139	1583	5.77241	3.7489	-1.86195	2.59063e-06	0.000129921	ENSMUST00000028475	Clp1	Exon
4642	peak_4642	chr4	118236189	118236489	12.9101	-	118236189	118236489	0	1	300	0	672	4501	744	3403	3.14261	1.86729	-1.19814	2.59745e-06	0.000129921	ENSMUST00000150096	Ptprf	Exon
5116	peak_5116	chr5	33855424	33855724	12.906	+	33855424	33855724	0	1	300	0	2535	20099	2686	12631	4.06619	2.73735	-1.24638	2.61177e-06	0.000130292	ENSMUST00000141416	Nsd2	Exon
11890	peak_11890	chr11	58331801	58337824	12.8999	+	58331801	58337824	0	2	62,88	0,5935	379	1519	494	1242	2.82923	1.50566	-1.24095	2.6298e-06	0.000130845	ENSMUST00000154278	Sh3bp5l	UTR5
11818	peak_11818	chr11	49216306	49217256	12.8971	+	49216306	49217256	0	1	950	0	688	8239	951	5169	4.81778	3.36915	-1.3516	2.64172e-06	0.000131092	ENSMUST00000061757	Zfp62	LastExon
16921	peak_16921	chr17	87986494	87986969	12.8942	+	87986494	87986969	0	1	475	0	663	9105	830	5486	4.99929	3.42962	-1.45904	2.65415e-06	0.000131363	ENSMUST00000005503	Msh6	Exon
774	peak_774	chr1	86350243	86350593	12.8525	-	86350243	86350593	0	1	350	0	2215	25746	2712	15195	4.78577	3.41129	-1.28734	2.73915e-06	0.000135215	ENSMUST00000027438	Ncl	UTR3
1479	peak_1479	chr2	83664408	83664622	12.8469	+	83664408	83664622	0	1	214	0	137	1066	166	479	4.17083	2.48358	-1.56327	2.75697e-06	0.000135739	ENSMUST00000081591	Zc3h15	UTR3
14144	peak_14144	chr13	17772336	17804041	12.8273	-	17772336	17804041	0	2	621604	0,31101	1945	36391	2323	28797	4.47078	3.1484	-1.24449	2.80927e-06	0.000137596	ENSMUST00000222848	Cdk13	UTR3
15781	peak_15781	chr15	86140552	86141202	12.8273	-	86140552	86141202	0	1	650	0	134	1717	190	1447	4.55318	3.13464	-1.32421	2.80427e-06	0.000137596	ENSMUST00000156546	Cerk	UTR3
13156	peak_13156	chr12	8791856	8792456	12.8241	+	8791856	8792456	0	1	600	0	259	8419	406	7131	6.03469	4.53245	-1.39075	2.82269e-06	0.000137895	ENSMUST00000171158	Sdc1	UTR3
3731	peak_3731	chr4	8785577	8801412	12.8076	+	8785577	8801412	0	2	186,89	0,15746	1169	6231	1398	4352	3.63859	2.34759	-1.21073	2.86264e-06	0.000139484	ENSMUST00000051558	Chd7	Exon
4232	peak_4232	chr4	143417388	143418865	12.8076	+	143417388	143418865	0	2	572,28	0,1449	172	3543	289	3098	5.57482	4.13784	-1.33971	2.87001e-06	0.000139484	ENSMUST00000037356	Pramef8	Exon
3782	peak_3782	chr4	32561935	32562585	12.801	+	32561935	32562585	0	1	650	0	1835	22798	1592	9411	4.2609	2.52048	-1.61017	2.90545e-06	0.000140123	ENSMUST00000171600	Bach2	Exon
13568	peak_13568	chr12	64951617	64957511	12.801	-	64951617	64957511	0	2	202673	0,5221	209	4733	301	2757	5.74323	4.03982	-1.57955	2.90291e-06	0.000140123	ENSMUST00000221957	Klhl28	UTR3
17767	peak_17767	chr18	82956417	82957392	12.801	+	82956417	82957392	0	1	975	0	949	15692	1251	12502	4.24701	2.77141	-1.3741	2.89576e-06	0.000140123	ENSMUST00000071233	Zfp516	Exon
9475	peak_9475	chr8	90248589	90248964	12.7756	-	90248589	90248964	0	1	375	0	476	6158	494	4221	4.39439	3.10431	-1.20958	2.96476e-06	0.000142619	ENSMUST00000109621	Tox3	LastExon
10265	peak_10265	chr9	21067519	21067794	12.7625	-	21067519	21067794	0	1	275	0	235	6873	367	5199	5.7614	4.07035	-1.56796	2.99938e-06	0.000143917	ENSMUST00000217150	Fdx1l	UTR3
9940	peak_9940	chr9	72944790	72946065	12.7615	+	72944790	72946065	0	1	1275	0	538	11893	710	8179	5.70252	4.29884	-1.31171	3.00912e-06	0.000144018	ENSMUST00000038489	Pygo1	LastExon
14648	peak_14648	chr14	49172250	49177951	12.7608	+	49172250	49177951	0	3	127,820,53	0,347,5648	942	40598	1250	35594	5.20158	3.89512	-1.22338	3.01816e-06	0.000144085	ENSMUST00000037362	Naa30	UTR5
2966	peak_2966	chr3	87931382	87938630	12.7524	+	87931382	87938630	0	2	893,57	0,7191	976	15540	1263	10705	5.20461	3.77698	-1.3315	3.04337e-06	0.000144921	ENSMUST00000055984	Isg20l2	UTR5
4379	peak_4379	chr4	32561713	32563116	12.7513	-	32561713	32563116	0	2	296,54	0,1349	1035	13639	878	5137	4.49611	2.6849	-1.67223	3.0534e-06	0.000145033	ENSMUST00000126225	Bach2os	UTR3
8347	peak_8347	chr7	99925181	99925906	12.7504	-	99925181	99925906	0	1	725	0	307	11969	470	9852	6.30575	4.81206	-1.39228	3.06308e-06	0.000145127	ENSMUST00000080817	Rnf169	UTR3
14050	peak_14050	chr13	83738389	83739089	12.7313	+	83738389	83739089	0	1	700	0	4084	147783	4094	70778	6.42363	5.01682	-1.30791	3.11163e-06	0.000147058	ENSMUST00000131907	C130071C03Rik	UTR5
10729	peak_10729	chr9	119484907	119485732	12.7253	-	119484907	119485732	0	1	825	0	78	2464	141	1581	5.6068	3.37677	-2.04008	3.13903e-06	0.000147669	ENSMUST00000120420	Scn5a	UTR3
17211	peak_17211	chr17	46258200	46258900	12.7253	-	46258200	46258900	0	1	700	0	395	8728	517	7098	4.61203	3.19963	-1.31741	3.14022e-06	0.000147669	ENSMUST00000225080	Tjap1	UTR3
1425	peak_1425	chr2	61811803	61812728	12.719	+	61811803	61812728	0	1	925	0	1680	42197	1488	19079	4.35698	2.70637	-1.45108	3.16196e-06	0.000148321	ENSMUST00000102737	Tbr1	LastExon
8758	peak_8758	chr8	45044192	45044542	12.714	+	45044192	45044542	0	1	350	0	677	5525	1087	5268	3.87729	2.4526	-1.3291	3.18075e-06	0.000148832	ENSMUST00000186342	Fat1	Exon
996	peak_996	chr1	155944146	155953587	12.7127	-	155944146	155953587	0	2	66434	0,9007	518	11021	731	7574	5.65093	4.23746	-1.32111	3.19147e-06	0.000148964	ENSMUST00000124495	Cep350	Exon
11447	peak_11447	chr10	78162316	78162591	12.705	-	78162316	78162591	0	1	275	0	103	1996	162	1329	4.56077	2.62143	-1.78481	3.21662e-06	0.000149768	ENSMUST00000220359	D10Jhu81e	UTR3
9459	peak_9459	chr8	86844463	86844813	12.6953	-	86844463	86844813	0	1	350	0	333	11168	504	7578	6.31488	4.68376	-1.51463	3.24631e-06	0.000150778	ENSMUST00000210029	N4bp1	UTR3
12357	peak_12357	chr11	115606889	115607639	12.6929	+	115606889	115607639	0	1	750	0	468	6399	651	4821	4.77059	3.25706	-1.40763	3.25968e-06	0.000151027	ENSMUST00000058109	Mrps7	LastExon
12819	peak_12819	chr11	84048640	84049115	12.6919	-	84048640	84049115	0	1	475	0	244	3652	330	2146	4.57506	2.71295	-1.71914	3.26988e-06	0.000151128	ENSMUST00000108101	Dusp14	LastExon
16826	peak_16826	chr17	49096836	49097311	12.682	+	49096836	49097311	0	1	475	0	10	1123	50	933	7.12673	3.79284	-3.02084	3.30053e-06	0.000152171	ENSMUST00000046254	Lrfn2	LastExon
14738	peak_14738	chr14	62587506	62587956	12.6762	+	62587506	62587956	0	1	450	0	126	5091	161	3316	5.89275	4.24708	-1.52411	3.32197e-06	0.000152786	ENSMUST00000162987	Fam124a	UTR5
11334	peak_11334	chr10	42185790	42196362	12.6699	-	42185790	42196362	0	2	505,95	0,10477	204	8940	323	7505	6.5836	5.11605	-1.36618	3.34475e-06	0.00015346	ENSMUST00000056974	Foxo3	UTR3
7884	peak_7884	chr7	142002631	142003006	12.6596	+	142002631	142003006	0	1	375	0	280	2849	313	1577	3.74562	2.02316	-1.59357	3.37688e-06	0.000154558	ENSMUST00000173941	Brsk2	UTR3
2655	peak_2655	chr2	165377688	165378138	12.6362	-	165377688	165378138	0	1	450	0	530	20793	673	14482	6.44064	5.02963	-1.31946	3.44603e-06	0.000157087	ENSMUST00000103084	Zfp334	UTR3
10381	peak_10381	chr9	45767870	45768270	12.6362	-	45767870	45768270	0	1	400	0	89	1636	144	1288	4.91847	3.18649	-1.60101	3.45713e-06	0.000157087	ENSMUST00000214971	Cep164	UTR3
16869	peak_16869	chr17	69387669	69389019	12.6362	+	69387669	69389019	0	1	1350	0	985	30726	1191	22359	6.06017	4.75166	-1.22539	3.45455e-06	0.000157087	ENSMUST00000112676	Zbtb14	LastExon
8755	peak_8755	chr8	45036865	45037115	12.6358	+	45036865	45037115	0	1	250	0	675	3674	864	2603	3.08163	1.55119	-1.42054	3.47468e-06	0.000157127	ENSMUST00000215588	Fat1	Exon
11816	peak_11816	chr11	49215106	49215956	12.6358	+	49215106	49215956	0	1	850	0	1024	29330	1231	19355	6.07853	4.8901	-1.11746	3.46912e-06	0.000157127	ENSMUST00000061757	Zfp62	LastExon
5993	peak_5993	chr5	112220002	112220177	12.6201	-	112220002	112220177	0	1	175	0	1128	3990	1006	2731	2.34532	1.23747	-1.0459	3.521e-06	0.000158841	ENSMUST00000181535	Miat	UTR3
2642	peak_2642	chr2	165000606	165001256	12.619	-	165000606	165001256	0	1	650	0	1056	16242	981	9398	4.88054	3.5688	-1.22785	3.53216e-06	0.000158964	ENSMUST00000122070	Ncoa5	UTR3
11131	peak_11131	chr10	91149514	91149664	12.6185	+	91149514	91149664	0	1	150	0	343	2742	360	1332	4.21283	2.55996	-1.52739	3.54186e-06	0.000159021	ENSMUST00000215801	Tmpo	UTR3
13829	peak_13829	chr13	14636554	14636929	12.617	+	14636554	14636929	0	1	375	0	159	1744	302	1366	4.69428	2.93961	-1.62448	3.55385e-06	0.00015918	ENSMUST00000222052	AW209491	UTR5
10243	peak_10243	chr9	15997954	15998179	12.6169	-	15997954	15998179	0	1	225	0	195	1455	183	556	4.1472	2.47855	-1.54476	3.56274e-06	0.000159201	ENSMUST00000082170	Fat3	Exon
2373	peak_2373	chr2	119658426	119660493	12.6035	-	119658426	119660493	0	2	33492	0,1575	173	5160	257	3298	6.15212	4.53457	-1.50163	3.60766e-06	0.000160684	ENSMUST00000028768	Ndufaf1	Exon
14280	peak_14280	chr13	58127903	58128278	12.6035	-	58127903	58128278	0	1	375	0	11183	60842	12811	57690	2.04915	1.0778	-0.923256	3.61298e-06	0.000160684	ENSMUST00000007980	Hnrnpa0	LastExon
12554	peak_12554	chr11	36041613	36046895	12.5907	-	36041613	36046895	0	2	71129	0,5153	73	905	97	344	4.47869	2.00233	-2.25783	3.65382e-06	0.000162118	ENSMUST00000057207	Tenm2	Exon
12492	peak_12492	chr11	11800834	11801384	12.5887	-	11800834	11801384	0	1	550	0	290	6230	445	3944	5.63059	4.09501	-1.43762	3.66748e-06	0.000162342	ENSMUST00000109664	Fignl1	UTR3
8869	peak_8869	chr8	72757205	72757530	12.5792	+	72757205	72757530	0	1	325	0	442	2391	477	1815	2.5729	1.32471	-1.17079	3.70041e-06	0.000163416	ENSMUST00000004494	Sin3b	LastExon
155	peak_155	chr1	63305492	63305917	12.5694	+	63305492	63305917	0	1	425	0	233	3430	372	2422	5.07999	3.6617	-1.32514	3.74851e-06	0.000164523	ENSMUST00000029025	Zdbf2	LastExon
4664	peak_4664	chr4	120921320	120922645	12.5694	-	120921320	120922645	0	1	1325	0	526	12494	724	9941	5.80089	4.5406	-1.18122	3.75424e-06	0.000164523	ENSMUST00000177880	Exo5	UTR3
15576	peak_15576	chr15	58943768	58943893	12.5694	-	58943768	58943893	0	1	125	0	344	2302	356	1159	2.79077	1.04071	-1.6169	3.76039e-06	0.000164523	ENSMUST00000226976	Mtss1	UTR3
16955	peak_16955	chr17	12969523	12972723	12.5694	-	12969523	12972723	0	2	36,39	0,3161	169	912	265	549	3.69995	1.8491	-1.70342	3.74676e-06	0.000164523	ENSMUST00000159986	Wtap	UTR3
2495	peak_2495	chr2	140659487	140661512	12.5621	-	140659487	140661512	0	1	2025	0	1515	67285	2021	46098	6.73236	5.37359	-1.26861	3.78831e-06	0.000165361	ENSMUST00000056760	Flrt3	UTR3
6649	peak_6649	chr6	120761242	120761517	12.562	+	120761242	120761517	0	1	275	0	232	2435	291	1326	4.46606	2.67835	-1.64885	3.79735e-06	0.000165373	ENSMUST00000143563	Cecr2	LastExon
7816	peak_7816	chr7	127602651	127603001	12.5487	+	127602651	127603001	0	1	350	0	225	2915	305	2149	4.17684	2.5838	-1.47651	3.8484e-06	0.000166898	ENSMUST00000206914	Rnf40	UTR3
19086	peak_19086	chrX	102143090	102143415	12.5487	-	102143090	102143415	0	1	325	0	48	2904	107	1940	7.15781	5.10716	-1.89869	3.85006e-06	0.000166898	ENSMUST00000056904	Ercc6l	UTR3
12222	peak_12222	chr11	97328649	97328949	12.5487	+	97328649	97328949	0	1	300	0	248	2301	244	1198	4.17407	2.6069	-1.45403	3.85904e-06	0.000166904	ENSMUST00000019026	Mrpl45	UTR3
10964	peak_10964	chr10	71381335	71381935	12.548	+	71381335	71381935	0	1	600	0	386	5500	536	3492	5.05812	3.4384	-1.49721	3.86971e-06	0.000166982	ENSMUST00000147277	Ipmk	UTR3
13349	peak_13349	chr12	86961839	86962489	12.5464	+	86961839	86962489	0	1	650	0	504	9539	594	5778	4.94062	3.31636	-1.5056	3.89815e-06	0.000167167	ENSMUST00000185434	Cipc	UTR3
18267	peak_18267	chr19	32514226	32515176	12.5464	+	32514226	32515176	0	1	950	0	239	9244	373	7442	6.50332	5.07707	-1.3275	3.89132e-06	0.000167167	ENSMUST00000025827	Minpp1	LastExon
18530	peak_18530	chr19	12486480	12501056	12.5464	-	12486480	12501056	0	3	10,715,50	0,5355,14526	596	10648	1067	10723	4.45885	2.89517	-1.45002	3.9006e-06	0.000167167	ENSMUST00000045521	Dtx4	Exon
1626	peak_1626	chr2	119923686	119924036	12.5441	+	119923686	119924036	0	1	350	0	405	3026	496	1915	4.13396	2.78738	-1.25841	3.91587e-06	0.000167441	ENSMUST00000150742	Mga	UTR5
15790	peak_15790	chr15	89099981	89100431	12.5408	-	89099981	89100431	0	1	450	0	348	2389	390	1542	3.77697	2.34041	-1.33754	3.93356e-06	0.000167817	ENSMUST00000164717	Tubgcp6	UTR3
5530	peak_5530	chr5	134598085	134598328	12.5359	+	134598085	134598328	0	1	243	0	288	2181	339	1271	3.91524	2.26503	-1.52701	3.97392e-06	0.000168396	ENSMUST00000023867	Rfc2	UTR3
9171	peak_9171	chr8	125670542	125670992	12.5359	+	125670542	125670992	0	1	450	0	34	1456	73	1167	6.51978	4.46616	-1.8811	3.96272e-06	0.000168396	ENSMUST00000053078	Map10	LastExon
14510	peak_14510	chr13	115088381	115088856	12.5359	-	115088381	115088856	0	1	475	0	220	4680	386	4214	5.45933	3.88705	-1.45704	3.96614e-06	0.000168396	ENSMUST00000224997	Gm49395	UTR3
6483	peak_6483	chr6	71978951	71979351	12.5349	+	71978951	71979351	0	1	400	0	162	1591	250	1218	4.05006	2.35912	-1.56506	3.98545e-06	0.000168506	ENSMUST00000205517	Polr1a	UTR3
13486	peak_13486	chr12	4880431	4880631	12.5296	-	4880431	4880631	0	1	200	0	194	2548	253	1102	4.95863	3.05967	-1.74589	4.00911e-06	0.000169127	ENSMUST00000141360	Ubxn2a	UTR3
1250	peak_1250	chr2	25181157	25182157	12.5279	+	25181157	25182157	0	1	1000	0	1091	17034	1282	13166	4.19684	2.87242	-1.23631	4.04022e-06	0.000169329	ENSMUST00000104999	Nrarp	LastExon
5987	peak_5987	chr5	110774533	110774783	12.5279	-	110774533	110774783	0	1	250	0	284	3068	367	2073	3.94428	2.32662	-1.49718	4.04083e-06	0.000169329	ENSMUST00000170468	Pus1	Exon
15384	peak_15384	chr15	90227502	90227727	12.5279	+	90227502	90227727	0	1	225	0	255	2206	305	1284	4.18998	2.56922	-1.49982	4.0253e-06	0.000169329	ENSMUST00000231200	Alg10b	LastExon
13976	peak_13976	chr13	55472820	55473145	12.5169	+	55472820	55473145	0	1	325	0	72	977	131	741	3.77134	1.74345	-1.8612	4.08066e-06	0.000170618	ENSMUST00000046533	Prr7	LastExon
1102	peak_1102	chr1	176769325	176769475	12.5162	-	176769325	176769475	0	1	150	0	823	3001	803	1722	3.09956	1.93527	-1.09534	4.10988e-06	0.000170705	ENSMUST00000195433	Cep170	UTR3
12078	peak_12078	chr11	77459426	77459776	12.5162	+	77459426	77459776	0	1	350	0	196	1470	266	1036	4.0566	2.54851	-1.40062	4.10058e-06	0.000170705	ENSMUST00000037912	Ssh2	UTR3
15319	peak_15319	chr15	80249450	80250175	12.5162	+	80249450	80250175	0	1	725	0	370	8722	412	5413	5.25299	3.72743	-1.41684	4.10917e-06	0.000170705	ENSMUST00000228788	Mief1	UTR3
445	peak_445	chr1	167001766	167088141	12.5146	+	167001766	167088141	0	3	621249164	0,76770,86211	567	19391	588	12992	5.99573	4.72503	-1.19134	4.12361e-06	0.000170899	ENSMUST00000126198	Fam78b	LastExon
14905	peak_14905	chr14	27486551	27486901	12.4945	-	27486551	27486901	0	1	350	0	190	6398	245	3366	6.31373	4.68575	-1.51623	4.19064e-06	0.000173296	ENSMUST00000050480	Ccdc66	Exon
9964	peak_9964	chr9	80113831	80116598	12.4941	+	80113831	80116598	0	2	283,67	0,2700	1061	15181	1223	8999	5.06243	3.82691	-1.16112	4.20093e-06	0.000173341	ENSMUST00000175999	Senp6	UTR3
4550	peak_4550	chr4	86581829	86583516	12.4716	-	86581829	86583516	0	2	189636	0,1051	356	8374	493	4722	5.76938	4.21342	-1.44414	4.2762e-06	0.000176062	ENSMUST00000070607	Haus6	Exon
1556	peak_1556	chr2	105696270	105696795	12.4691	+	105696270	105696795	0	1	525	0	1399	21303	1257	9526	5.17613	3.80592	-1.27874	4.29295e-06	0.000176366	ENSMUST00000146803	Pax6	UTR5
4592	peak_4592	chr4	108717870	108718120	12.4677	-	108717870	108718120	0	1	250	0	287	3213	336	1808	4.71803	3.26185	-1.35545	4.30652e-06	0.000176539	ENSMUST00000106658	Zfyve9	Exon
9596	peak_9596	chr8	120657963	120658163	12.4651	-	120657963	120658163	0	1	200	0	610	2970	648	1849	3.16093	1.74184	-1.32195	4.3405e-06	0.000176862	ENSMUST00000181836	Emc8	UTR3
14894	peak_14894	chr14	24134902	24135527	12.4651	-	24134902	24135527	0	1	625	0	384	8029	430	4779	5.28538	3.75402	-1.4196	4.35191e-06	0.000176862	ENSMUST00000090398	Dlg5	UTR3
17991	peak_17991	chr18	68262411	68262711	12.4651	-	68262411	68262711	0	1	300	0	60	1415	102	837	5.62681	3.55514	-1.89624	4.33442e-06	0.000176862	ENSMUST00000042852	Fam210a	UTR3
18386	peak_18386	chr19	47113333	47113683	12.4651	+	47113333	47113683	0	1	350	0	357	4958	405	2893	4.82995	3.26087	-1.45678	4.34561e-06	0.000176862	ENSMUST00000072141	Pdcd11	Exon
8307	peak_8307	chr7	84110055	84110605	12.4591	-	84110055	84110605	0	1	550	0	544	7367	539	3720	4.99461	3.57234	-1.3233	4.39821e-06	0.000177595	ENSMUST00000117085	Abhd17c	UTR3
10003	peak_10003	chr9	101074726	101102226	12.4591	+	101074726	101102226	0	2	6941656	0,25844	2192	81857	2719	63905	6.40223	5.2039	-1.12766	4.39119e-06	0.000177595	ENSMUST00000085177	Msl2	LastExon
17588	peak_17588	chr18	37497896	37498646	12.4591	+	37497896	37498646	0	1	750	0	28	1484	97	1338	6.97293	4.59793	-2.16369	4.39674e-06	0.000177595	ENSMUST00000059571	Pcdhb19	LastExon
12194	peak_12194	chr11	94211478	94214557	12.4504	+	94211478	94214557	0	2	2531072	0,2007	1209	18888	1566	16492	4.60494	3.34683	-1.17833	4.43445e-06	0.000178676	ENSMUST00000041589	Tob1	UTR5
2866	peak_2866	chr3	38956851	38958406	12.4483	+	38956851	38958406	0	2	744,6	0,1549	1612	16607	1796	9267	4.5694	3.09476	-1.36803	4.45025e-06	0.00017893	ENSMUST00000061260	Fat4	Exon
11744	peak_11744	chr11	21148095	21148645	12.4465	+	21148095	21148645	0	1	550	0	1004	18101	1055	8783	5.39855	3.8528	-1.4327	4.46524e-06	0.000179151	ENSMUST00000149675	Peli1	UTR5
7396	peak_7396	chr7	28459157	28466609	12.4452	+	28459157	28466609	0	3	906,73,21	0,2837,7431	289	7445	405	6633	4.90059	3.52908	-1.27866	4.47893e-06	0.000179319	ENSMUST00000191267	Lrfn1	UTR5
11071	peak_11071	chr10	81182084	81182409	12.4452	+	81182084	81182409	0	1	325	0	7637	32456	8166	23059	2.90893	1.66799	-1.16311	4.48846e-06	0.00017932	ENSMUST00000047864	Eef2	UTR3
1697	peak_1697	chr2	129126014	129126289	12.4193	+	129126014	129126289	0	1	275	0	94	1796	143	950	5.4628	3.43804	-1.85461	4.5889e-06	0.000182559	ENSMUST00000103205	Polr1b	LastExon
4765	peak_4765	chr4	132493131	132493606	12.4193	-	132493131	132493606	0	1	475	0	49	1520	152	1892	5.50327	3.5429	-1.7986	4.58408e-06	0.000182559	ENSMUST00000030724	Sesn2	UTR3
15606	peak_15606	chr15	73105993	73106318	12.3931	-	73105993	73106318	0	1	325	0	183	2164	258	1143	4.82318	3.02527	-1.65448	4.68302e-06	0.000185911	ENSMUST00000044113	Ago2	UTR3
13718	peak_13718	chr12	91641853	91647936	12.3835	-	91641853	91647936	0	2	70705	0,5378	523	6912	567	3694	4.44755	2.76414	-1.55449	4.72433e-06	0.000187157	ENSMUST00000164713	Ston2	Exon
6629	peak_6629	chr6	117845366	117845691	12.3476	+	117845366	117845691	0	1	325	0	445	3448	514	1823	3.68238	1.89512	-1.64644	4.85333e-06	0.000191864	ENSMUST00000132644	Zfp637	UTR5
15231	peak_15231	chr15	51882222	51882747	12.3393	+	51882222	51882747	0	1	525	0	179	1938	278	1294	4.67758	3.01775	-1.53211	4.89181e-06	0.000192981	ENSMUST00000059599	Utp23	UTR3
4772	peak_4772	chr4	132827828	132828078	12.332	-	132827828	132828078	0	1	250	0	614	4496	653	2622	3.67759	2.1455	-1.42261	4.92685e-06	0.000193958	ENSMUST00000105919	Ppp1r8	UTR3
9529	peak_9529	chr8	106885612	106886462	12.3204	-	106885612	106886462	0	1	850	0	2443	40705	2744	28191	4.71953	3.33834	-1.28945	4.97696e-06	0.000195522	ENSMUST00000175940	Chtf8	UTR3
7593	peak_7593	chr7	79531463	79531813	12.3195	+	79531463	79531813	0	1	350	0	844	9418	776	5083	3.97766	2.52452	-1.36445	4.99047e-06	0.000195645	ENSMUST00000182125	Mir9-3hg	UTR5
797	peak_797	chr1	93301410	93301931	12.3193	-	93301410	93301931	0	2	385,15	0,506	196	2675	324	1895	5.02686	3.36993	-1.52994	5.05216e-06	0.000195668	ENSMUST00000136754	Mterf4	UTR3
5652	peak_5652	chr5	145220111	145220411	12.3193	+	145220111	145220411	0	1	300	0	124	1077	201	871	4.18854	2.59795	-1.47715	5.04081e-06	0.000195668	ENSMUST00000031601	Zkscan5	LastExon
10975	peak_10975	chr10	75015620	75015970	12.3193	+	75015620	75015970	0	1	350	0	21	1482	57	1204	7.26005	4.95266	-2.10129	5.02894e-06	0.000195668	ENSMUST00000159991	Gnaz	UTR3
14719	peak_14719	chr14	61191372	61192272	12.3193	+	61191372	61192272	0	1	900	0	497	13320	602	8904	5.97222	4.64405	-1.24067	5.05331e-06	0.000195668	ENSMUST00000227570	Sacs	UTR3
14919	peak_14919	chr14	31487687	31493857	12.3193	-	31487687	31493857	0	3	54135261	0,4634,5909	452	19653	595	13203	6.69553	5.32037	-1.27954	5.05088e-06	0.000195668	ENSMUST00000227852	Mettl6	UTR3
18040	peak_18040	chr18	80129836	80130686	12.3193	-	80129836	80130686	0	1	850	0	325	6213	446	5190	5.26852	3.92821	-1.25117	5.03889e-06	0.000195668	ENSMUST00000066743	Adnp2	LastExon
8108	peak_8108	chr7	30359643	30360418	12.3191	-	30359643	30360418	0	1	775	0	174	3095	238	2470	4.08761	2.58235	-1.3956	5.06436e-06	0.000195694	ENSMUST00000046351	Lrfn3	Exon
8751	peak_8751	chr8	45023081	45024031	12.3114	+	45023081	45024031	0	1	950	0	1486	12524	2014	10446	4.04771	2.70351	-1.25412	5.12295e-06	0.000196748	ENSMUST00000215588	Fat1	Exon
9761	peak_9761	chr9	37522734	37523184	12.3114	+	37522734	37523184	0	1	450	0	361	4011	492	2698	4.68695	3.16456	-1.4187	5.11891e-06	0.000196748	ENSMUST00000213411	Msantd2	UTR5
12405	peak_12405	chr11	119898705	119898980	12.3114	+	119898705	119898980	0	1	275	0	165	1946	175	919	4.1668	2.26738	-1.7428	5.11704e-06	0.000196748	ENSMUST00000147781	Rptor	UTR3
64	peak_64	chr1	36069124	36104652	12.2938	+	36069124	36104652	0	2	601140	0,34388	716	28768	882	23978	5.69769	4.41832	-1.19612	5.19642e-06	0.000199165	ENSMUST00000194670	Hs6st1	UTR5
12782	peak_12782	chr11	78159498	78160198	12.2908	-	78159498	78160198	0	1	700	0	1122	34708	1362	27242	5.5266	4.20036	-1.23911	5.21752e-06	0.000199567	ENSMUST00000017530	Traf4	UTR3
2876	peak_2876	chr3	41613237	41614437	12.2829	+	41613237	41614437	0	1	1200	0	693	26346	774	15937	6.47379	5.10483	-1.28435	5.27545e-06	0.000200673	ENSMUST00000168086	Jade1	LastExon
8916	peak_8916	chr8	84834238	84834813	12.2829	+	84834238	84834813	0	1	575	0	863	5436	1040	3889	3.34001	1.9179	-1.32207	5.27836e-06	0.000200673	ENSMUST00000036734	Gadd45gip1	LastExon
12069	peak_12069	chr11	76212712	76213362	12.2829	+	76212712	76213362	0	1	650	0	219	7537	338	6257	6.15362	4.63368	-1.40723	5.27014e-06	0.000200673	ENSMUST00000169701	Glod4	UTR3
1008	peak_1008	chr1	157157361	157157686	12.2775	-	157157361	157157686	0	1	325	0	408	2230	432	1583	3.47603	2.275	-1.12743	5.31376e-06	0.000201423	ENSMUST00000132699	Rasal2	Exon
8216	peak_8216	chr7	62464070	62464170	12.2775	-	62464070	62464170	0	1	100	0	13	424	53	295	4.34242	1.23363	-2.80884	5.33012e-06	0.000201423	ENSMUST00000094339	Peg12	LastExon
13731	peak_13731	chr12	99388289	99388789	12.2775	-	99388289	99388789	0	1	500	0	1176	20889	1256	13139	5.37165	4.13572	-1.15713	5.32152e-06	0.000201423	ENSMUST00000177287	Foxn3	UTR3
9489	peak_9489	chr8	95327361	95328036	12.2707	-	95327361	95328036	0	1	675	0	475	6608	558	5172	4.2518	2.96677	-1.20078	5.39812e-06	0.00020237	ENSMUST00000057717	Zfp319	UTR3
10269	peak_10269	chr9	21237312	21237812	12.2707	-	21237312	21237812	0	1	500	0	230	2930	304	2292	4.20473	2.73981	-1.35971	5.39055e-06	0.00020237	ENSMUST00000193982	Keap1	Exon
13062	peak_13062	chr11	116538814	116539464	12.2707	-	116538814	116539464	0	1	650	0	728	35137	840	24787	5.80881	4.40253	-1.30925	5.37514e-06	0.00020237	ENSMUST00000134102	Ube2o	UTR3
18984	peak_18984	chrX	20935194	20935444	12.2707	-	20935194	20935444	0	1	250	0	110	1019	139	564	4.38057	2.62249	-1.61819	5.38557e-06	0.00020237	ENSMUST00000009550	Elk1	UTR3
6427	peak_6427	chr6	48596732	48597282	12.2687	+	48596732	48597282	0	1	550	0	265	4274	465	4191	3.95498	2.35466	-1.47984	5.42438e-06	0.000202658	ENSMUST00000135151	Repin1	LastExon
13033	peak_13033	chr11	115615127	115615352	12.2687	-	115615127	115615352	0	1	225	0	198	2399	194	1391	4.06015	2.57566	-1.37734	5.42727e-06	0.000202658	ENSMUST00000106503	Slc25a19	UTR3
2335	peak_2335	chr2	104778163	104787378	12.2629	-	104778163	104787378	0	3	90326859	0,1771,8356	3239	31127	3273	17823	4.50568	3.33355	-1.10042	5.47691e-06	0.000203473	ENSMUST00000117237	Qser1	Exon
5546	peak_5546	chr5	135244760	135245335	12.2629	+	135244760	135245335	0	1	575	0	1126	7933	1203	5358	3.98079	2.75278	-1.15088	5.49227e-06	0.000203473	ENSMUST00000002825	Baz1b	UTR3
10791	peak_10791	chr10	11281665	11289961	12.2629	+	11281665	11289961	0	2	58442	0,7854	493	4567	632	3698	4.32605	3.09321	-1.15513	5.46356e-06	0.000203473	ENSMUST00000070300	Fbxo30	UTR5
11981	peak_11981	chr11	68815074	68815624	12.2629	+	68815074	68815624	0	1	550	0	1575	23350	1618	15104	5.02403	3.7961	-1.15089	5.48913e-06	0.000203473	ENSMUST00000092984	Myh10	UTR3
14555	peak_14555	chr14	21793237	21793637	12.2584	+	21793237	21793637	0	1	400	0	188	2213	222	1178	4.7969	3.31109	-1.37779	5.52018e-06	0.000204106	ENSMUST00000119430	Samd8	LastExon
10232	peak_10232	chr9	15334187	15334637	12.2561	-	15334187	15334637	0	1	450	0	229	2718	306	1787	4.82209	3.41453	-1.30866	5.53972e-06	0.000204428	ENSMUST00000066038	Gm16568	UTR5
13741	peak_13741	chr12	101058376	101058826	12.2544	-	101058376	101058826	0	1	450	0	516	10204	573	5566	5.48308	4.23945	-1.1627	5.55717e-06	0.000204671	ENSMUST00000223161	Ppp4r3a	UTR3
16161	peak_16161	chr16	64855560	64856085	12.2532	+	64855560	64856085	0	1	525	0	1063	13318	1339	8927	4.89886	3.5624	-1.2453	5.57271e-06	0.000204843	ENSMUST00000136532	Cggbp1	UTR5
3696	peak_3696	chr3	144434052	144434627	12.2506	-	144434052	144434627	0	1	575	0	1186	18590	1458	10761	5.21594	3.65155	-1.45042	5.60057e-06	0.000205218	ENSMUST00000043325	Hs2st1	UTR3
14606	peak_14606	chr14	32570091	32570416	12.2506	+	32570091	32570416	0	1	325	0	300	1865	327	1155	3.67163	2.26887	-1.30432	5.60466e-06	0.000205218	ENSMUST00000228549	Ercc6	UTR3
13937	peak_13937	chr13	49379742	49380579	12.2438	+	49379742	49380579	0	2	291,9	0,828	640	4151	737	3078	2.94429	1.57519	-1.27463	5.64204e-06	0.000206186	ENSMUST00000110085	Bicd2	Exon
13749	peak_13749	chr12	102569931	102570356	12.2433	-	102569931	102570356	0	1	425	0	318	10166	290	3674	5.3264	3.31251	-1.84368	5.65486e-06	0.000206255	ENSMUST00000046518	Itpk1	UTR3
16989	peak_16989	chr17	23557918	23558293	12.2301	-	23557918	23558293	0	1	375	0	129	3051	188	2737	4.6468	3.19138	-1.35065	5.7177e-06	0.000208144	ENSMUST00000180920	Gm26695	UTR5
10267	peak_10267	chr9	21230004	21230829	12.2111	-	21230004	21230829	0	1	825	0	687	15148	860	10822	5.48969	4.0821	-1.31067	5.81561e-06	0.000210906	ENSMUST00000216436	Keap1	UTR3
11558	peak_11558	chr10	85892769	85893319	12.2111	-	85892769	85893319	0	1	550	0	430	12128	517	7745	6.05005	4.66727	-1.28861	5.81593e-06	0.000210906	ENSMUST00000037646	Prdm4	UTR3
6594	peak_6594	chr6	113143748	113144073	12.198	+	113143748	113144073	0	1	325	0	436	4323	452	2746	4.40105	3.12046	-1.19608	5.89142e-06	0.000212825	ENSMUST00000150107	Setd5	UTR5
14636	peak_14636	chr14	47310523	47319421	12.198	+	47310523	47319421	0	2	590,10	0,8888	1518	15618	1727	13299	3.74714	2.6055	-1.07214	5.88265e-06	0.000212825	ENSMUST00000164235	Mapk1ip1l	Exon
8492	peak_8492	chr7	127343896	127344171	12.1901	-	127343896	127344171	0	1	275	0	159	1869	303	2192	3.73112	2.30942	-1.32026	5.93541e-06	0.000214004	ENSMUST00000205266	Zfp768	LastExon
81	peak_81	chr1	37875602	37876027	12.1875	+	37875602	37876027	0	1	425	0	49	1518	93	1159	6.18576	4.42597	-1.6176	5.95861e-06	0.000214384	ENSMUST00000041621	Lipt1	LastExon
12181	peak_12181	chr11	88192661	88193911	12.1875	+	88192661	88193911	0	1	1250	0	1429	23466	1719	17832	4.38694	3.01067	-1.2804	5.96869e-06	0.000214384	ENSMUST00000154812	Cuedc1	UTR3
12021	peak_12021	chr11	71025218	71025968	12.1822	+	71025218	71025968	0	1	750	0	463	18342	694	11509	6.57065	4.90255	-1.53793	6.00211e-06	0.000215175	ENSMUST00000048807	Mis12	LastExon
10797	peak_10797	chr10	13129855	13129980	12.1776	+	13129855	13129980	0	1	125	0	132	1263	187	530	4.13655	2.42693	-1.57372	6.04397e-06	0.000215861	ENSMUST00000121766	Plagl1	UTR3
14226	peak_14226	chr13	46687176	46687451	12.1776	-	46687176	46687451	0	1	275	0	217	3295	273	1792	5.13258	3.66023	-1.36511	6.04414e-06	0.000215861	ENSMUST00000224203	Nup153	LastExon
8759	peak_8759	chr8	45045118	45051705	12.1715	+	45045118	45051705	0	2	50925	0,5662	1126	39437	1654	32992	6.14036	4.71039	-1.32784	6.10631e-06	0.000216781	ENSMUST00000215588	Fat1	LastExon
11805	peak_11805	chr11	44563934	44564984	12.1715	+	44563934	44564984	0	1	1050	0	1143	30326	1325	21613	5.86622	4.59012	-1.19155	6.1136e-06	0.000216781	ENSMUST00000019333	Rnf145	LastExon
13320	peak_13320	chr12	83951482	83952632	12.1715	+	83951482	83952632	0	1	1150	0	245	5471	418	5193	5.09538	3.55669	-1.42433	6.11588e-06	0.000216781	ENSMUST00000053744	Riox1	LastExon
15282	peak_15282	chr15	76713508	76713908	12.1715	+	76713508	76713908	0	1	400	0	84	1086	129	724	4.03554	2.09238	-1.77783	6.10143e-06	0.000216781	ENSMUST00000142506	Lrrc14	UTR5
3872	peak_3872	chr4	55009744	55010819	12.1674	+	55009744	55010819	0	1	1075	0	7247	42472	6862	27686	3.67777	2.58	-1.03364	6.16647e-06	0.000217397	ENSMUST00000098070	Zfp462	Exon
14453	peak_14453	chr13	98248819	98249294	12.1674	-	98248819	98249294	0	1	475	0	416	13644	514	8442	6.29702	4.88773	-1.31512	6.17939e-06	0.000217397	ENSMUST00000040972	Utp15	UTR3
16856	peak_16856	chr17	56996089	56996189	12.1674	+	56996089	56996189	0	1	100	0	118	689	156	401	3.63286	1.8554	-1.63342	6.17462e-06	0.000217397	ENSMUST00000002735	Clpp	UTR3
17827	peak_17827	chr18	24013801	24014351	12.1674	-	24013801	24014351	0	1	550	0	772	35559	953	20172	6.67216	5.36268	-1.22086	6.15719e-06	0.000217397	ENSMUST00000153337	Zfp24	UTR3
9536	peak_9536	chr8	107580380	107581255	12.1551	-	107580380	107581255	0	1	875	0	2320	15140	3062	12331	3.89579	2.69534	-1.1245	6.24399e-06	0.000219261	ENSMUST00000044106	Psmd7	UTR3
4160	peak_4160	chr4	132777959	132778234	12.1463	+	132777959	132778234	0	1	275	0	503	6385	525	3209	4.66648	3.01126	-1.52533	6.29536e-06	0.000220594	ENSMUST00000102561	Rpa2	UTR3
18664	peak_18664	chr19	59942804	59943129	12.1463	-	59942804	59943129	0	1	325	0	244	2331	368	1765	4.39635	2.81817	-1.45698	6.30535e-06	0.000220594	ENSMUST00000170819	Rab11fip2	Exon
8419	peak_8419	chr7	116158315	116164392	12.1404	-	116158315	116164392	0	2	64361	0,5716	254	2177	275	1367	3.24378	1.70518	-1.4244	6.34321e-06	0.000221507	ENSMUST00000183308	Plekha7	UTR3
7410	peak_7410	chr7	29784322	29784897	12.1382	+	29784322	29784897	0	1	575	0	303	3265	408	2351	3.92078	2.3391	-1.46278	6.36435e-06	0.000221835	ENSMUST00000122387	Zfp30	UTR5
16723	peak_16723	chr17	34895472	34895947	12.1276	+	34895472	34895947	0	1	475	0	892	10763	1222	8750	3.93964	2.47571	-1.35937	6.42329e-06	0.000223476	ENSMUST00000052778	Zbtb12	LastExon
3143	peak_3143	chr3	105716736	105717011	12.1192	+	105716736	105717011	0	1	275	0	48	851	141	918	4.90255	2.75235	-1.95874	6.47901e-06	0.000224775	ENSMUST00000098273	Inka2	LastExon
17360	peak_17360	chr17	83502043	83502343	12.1192	-	83502043	83502343	0	1	300	0	1383	12638	1606	7777	4.21615	2.69923	-1.40366	6.48448e-06	0.000224775	ENSMUST00000167741	Cox7a2l	UTR3
16894	peak_16894	chr17	80227794	80228169	12.1102	+	80227794	80228169	0	1	375	0	115	2147	190	1431	5.46921	3.67609	-1.63691	6.53727e-06	0.000226182	ENSMUST00000069486	Gemin6	LastExon
17122	peak_17122	chr17	33241518	33242643	12.1102	-	33241518	33242643	0	1	1125	0	263	9900	376	6289	6.46149	5.00739	-1.34843	6.56105e-06	0.000226182	ENSMUST00000008830	Zfp955a	UTR3
17171	peak_17171	chr17	35956818	35957118	12.1102	-	35956818	35957118	0	1	300	0	321	11661	422	8839	6.12914	4.71418	-1.31326	6.55265e-06	0.000226182	ENSMUST00000043757	Abcf1	UTR3
7262	peak_7262	chr7	16317322	16317622	12.0989	+	16317322	16317622	0	1	300	0	57	2068	120	1957	4.85782	3.01212	-1.69165	6.62475e-06	0.000227962	ENSMUST00000002152	Bbc3	UTR3
1904	peak_1904	chr2	167977452	167977852	12.0966	+	167977452	167977852	0	1	400	0	197	2851	190	1594	4.49601	3.03163	-1.35748	6.65983e-06	0.000228335	ENSMUST00000029053	Ptpn1	UTR3
9680	peak_9680	chr9	15334360	15334810	12.0966	+	15334360	15334810	0	1	450	0	235	2694	311	1762	4.76756	3.41423	-1.25924	6.65018e-06	0.000228335	ENSMUST00000066038	Gm16568	UTR5
4071	peak_4071	chr4	122999019	123001772	12.0876	+	122999019	123001772	0	3	25,57,1868	0,319,885	1848	26083	1824	18162	4.71365	3.57542	-1.06751	6.72581e-06	0.000229762	ENSMUST00000030407	Mycl	LastExon
5117	peak_5117	chr5	33876892	33876967	12.0876	+	33876892	33876967	0	1	75	0	259	1383	310	738	3.31511	1.52856	-1.64047	6.72408e-06	0.000229762	ENSMUST00000142080	Nsd2	UTR3
2274	peak_2274	chr2	84871923	84872123	12.0699	-	84871923	84872123	0	1	200	0	116	3679	116	1180	4.37867	2.13834	-2.03803	6.8249e-06	0.000232595	ENSMUST00000151799	Rtn4rl2	UTR3
11224	peak_11224	chr10	127741664	127741914	12.0699	+	127741664	127741914	0	1	250	0	174	2907	221	2088	4.80835	3.27739	-1.41615	6.83342e-06	0.000232595	ENSMUST00000054287	Zbtb39	LastExon
153	peak_153	chr1	63304292	63304592	12.0629	+	63304292	63304592	0	1	300	0	187	1902	259	1151	4.57555	2.93594	-1.51152	6.91291e-06	0.000233729	ENSMUST00000029025	Zdbf2	LastExon
590	peak_590	chr1	23844845	23845070	12.0629	-	23844845	23845070	0	1	225	0	48	794	67	258	5.24616	2.7138	-2.29158	6.95036e-06	0.000233729	ENSMUST00000149737	Smap1	UTR3
1955	peak_1955	chr2	180717869	180718419	12.0629	+	180717869	180718419	0	1	550	0	559	14179	726	9610	5.88918	4.48283	-1.30562	6.91163e-06	0.000233729	ENSMUST00000078687	Gid8	LastExon
5227	peak_5227	chr5	76858464	76866059	12.0629	+	76858464	76866059	0	2	690,60	0,7535	1446	10867	1510	10056	3.31605	2.40491	-0.866563	6.95348e-06	0.000233729	ENSMUST00000163347	C530008M17Rik	Exon
10617	peak_10617	chr9	96995537	96996212	12.0629	-	96995537	96996212	0	1	675	0	248	3011	337	2442	3.61743	2.12065	-1.38573	6.93436e-06	0.000233729	ENSMUST00000064445	Spsb4	UTR3
10626	peak_10626	chr9	100495242	100497878	12.0629	-	100495242	100497878	0	2	429621	0,2015	580	14790	929	11453	5.90048	4.55556	-1.25431	6.92021e-06	0.000233729	ENSMUST00000112874	Nck1	Exon
14211	peak_14211	chr13	41338835	41338885	12.0629	-	41338835	41338885	0	1	50	0	172	875	205	573	3.02896	1.44625	-1.45988	6.9118e-06	0.000233729	ENSMUST00000225053	Nedd9	UTR3
17992	peak_17992	chr18	68267786	68267986	12.0623	-	68267786	68267986	0	1	200	0	81	870	143	484	4.69129	2.50263	-1.99296	6.96881e-06	0.000233827	ENSMUST00000042852	Fam210a	UTR3
11709	peak_11709	chr11	3649593	3658723	12.0602	+	3649593	3658723	0	3	553,195,52	0,659,9078	1044	8392	1141	5520	4.17343	2.90583	-1.18341	6.99109e-06	0.000234158	ENSMUST00000140242	Morc2a	UTR5
11341	peak_11341	chr10	42562962	42563387	12.0567	-	42562962	42563387	0	1	425	0	643	22741	690	11224	6.38824	4.89288	-1.38729	7.02081e-06	0.000234736	ENSMUST00000019938	Nr2e1	UTR3
7808	peak_7808	chr7	127254557	127254803	12.0555	+	127254557	127254803	0	1	246	0	103	1359	138	974	3.58017	1.95002	-1.50736	7.11388e-06	0.000234932	ENSMUST00000052509	Zfp771	LastExon
9738	peak_9738	chr9	31053949	31054299	12.0555	+	31053949	31054299	0	1	350	0	281	3920	328	2438	5.00916	3.5984	-1.30946	7.07044e-06	0.000234932	ENSMUST00000214585	Zbtb44	Exon
12682	peak_12682	chr11	68987771	68987996	12.0555	-	68987771	68987996	0	1	225	0	107	1239	162	648	4.32659	2.13879	-1.9901	7.05307e-06	0.000234932	ENSMUST00000146490	Pfas	UTR3
14550	peak_14550	chr14	21516738	21517588	12.0555	+	21516738	21517588	0	1	850	0	2708	46038	2393	20104	5.23887	3.67507	-1.44758	7.08384e-06	0.000234932	ENSMUST00000112458	Kat6b	UTR5
15807	peak_15807	chr15	91189001	91191380	12.0555	-	91189001	91191380	0	2	14711	0,1668	545	10999	523	5532	5.5828	4.23847	-1.2504	7.1133e-06	0.000234932	ENSMUST00000069511	Abcd2	Exon
18311	peak_18311	chr19	41586057	41586532	12.0555	+	41586057	41586532	0	1	475	0	399	5319	494	3971	4.69628	3.33987	-1.26598	7.09691e-06	0.000234932	ENSMUST00000172371	Gm340	LastExon
18696	peak_18696	chrX	9309674	9309999	12.0555	+	9309674	9309999	0	1	325	0	46	929	81	433	5.56805	3.1674	-2.1753	7.10481e-06	0.000234932	ENSMUST00000015486	Xk	LastExon
9636	peak_9636	chr8	123997642	124003387	12.0534	-	123997642	124003387	0	2	464411	0,5334	369	9020	446	5715	5.46166	3.88552	-1.45416	7.13639e-06	0.000235264	ENSMUST00000165628	Taf5l	LastExon
2956	peak_2956	chr3	84977302	84978027	12.0521	+	84977302	84978027	0	1	725	0	461	23055	569	15879	6.88276	5.66202	-1.13957	7.1681e-06	0.000235486	ENSMUST00000151410	Fbxw7	UTR5
12762	peak_12762	chr11	76212520	76213170	12.0521	-	76212520	76213170	0	1	650	0	207	7551	321	6254	6.27024	4.755	-1.40015	7.16543e-06	0.000235486	ENSMUST00000169701	Glod4	UTR3
2919	peak_2919	chr3	61365081	61366431	12.052	+	61365081	61366431	0	1	1350	0	1286	23791	1625	19038	5.22471	3.96335	-1.178	7.19344e-06	0.000235498	ENSMUST00000066298	B430305J03Rik	UTR5
10031	peak_10031	chr9	106463873	106463948	12.052	+	106463873	106463948	0	1	75	0	748	2966	807	1989	2.84591	1.48612	-1.26492	7.18204e-06	0.000235498	ENSMUST00000024260	Pcbp4	UTR3
4954	peak_4954	chr4	154319374	154320749	12.0402	-	154319374	154320749	0	1	1375	0	861	36335	1149	28641	6.56949	5.26055	-1.21909	7.27765e-06	0.00023743	ENSMUST00000097759	Prdm16	UTR3
15062	peak_15062	chr14	67676655	67677780	12.0402	-	67676655	67677780	0	1	1125	0	1529	31259	1971	19679	5.55782	3.99774	-1.4444	7.2686e-06	0.00023743	ENSMUST00000163100	Cdca2	UTR3
6239	peak_6239	chr5	140759932	140761082	12.0363	-	140759932	140761082	0	1	1150	0	1512	50259	1865	43696	5.69618	4.51334	-1.10632	7.31014e-06	0.000238078	ENSMUST00000198447	Gna12	UTR3
3010	peak_3010	chr3	88985190	89001847	12.0236	+	88985190	89001847	0	2	600,75	0,16582	900	15185	998	9793	5.31842	4.0702	-1.16544	7.38736e-06	0.000240178	ENSMUST00000090933	Ash1l	Exon
12327	peak_12327	chr11	112785175	112786075	12.016	+	112785175	112786075	0	1	900	0	2967	71811	3739	63068	5.80946	4.81407	-0.939046	7.43901e-06	0.000241441	ENSMUST00000000579	Sox9	LastExon
10980	peak_10980	chr10	75182336	75182761	12.0143	+	75182336	75182761	0	1	425	0	504	10418	495	6137	5.3405	3.99685	-1.25045	7.46086e-06	0.000241735	ENSMUST00000164107	Bcr	UTR3
812	peak_812	chr1	105284466	105284866	12.0004	-	105284466	105284866	0	1	400	0	93	1774	116	997	4.79832	2.93556	-1.70578	7.54589e-06	0.00024407	ENSMUST00000172299	Rnf152	LastExon
2084	peak_2084	chr2	26460252	26460852	11.9946	-	26460252	26460852	0	1	600	0	1226	17303	1174	12556	3.9826	2.85492	-1.05879	7.58945e-06	0.000245059	ENSMUST00000028288	Notch1	LastExon
8122	peak_8122	chr7	34639038	34640413	11.9929	-	34639038	34640413	0	1	1375	0	1256	19801	1249	12040	4.6501	3.27018	-1.28115	7.62679e-06	0.00024534	ENSMUST00000032709	Kctd15	UTR3
14901	peak_14901	chr14	26665357	26665757	11.9929	-	26665357	26665757	0	1	400	0	138	1604	210	951	4.75077	3.11513	-1.50576	7.63721e-06	0.00024534	ENSMUST00000052932	Pde12	UTR3
15404	peak_15404	chr15	99082165	99082515	11.9929	+	99082165	99082515	0	1	350	0	115	2547	144	1428	4.8192	2.90226	-1.75076	7.63015e-06	0.00024534	ENSMUST00000229740	Troap	UTR5
6016	peak_6016	chr5	113843935	113844335	11.9923	-	113843935	113844335	0	1	400	0	1217	13851	1296	9949	4.64344	3.53386	-1.04263	7.65737e-06	0.000245447	ENSMUST00000004646	Coro1c	UTR3
8069	peak_8069	chr7	28386345	28386720	11.9923	-	28386345	28386720	0	1	375	0	53	918	107	626	4.91973	2.72464	-1.99402	7.7056e-06	0.000245447	ENSMUST00000003536	Med29	UTR3
11947	peak_11947	chr11	62117863	62118363	11.9923	+	62117863	62118363	0	1	500	0	356	4322	490	3233	4.72768	3.27459	-1.34544	7.68563e-06	0.000245447	ENSMUST00000201866	Specc1	UTR5
15328	peak_15328	chr15	81649203	81651253	11.9923	+	81649203	81651253	0	1	2050	0	2433	71675	2667	54153	5.71059	4.52557	-1.10934	7.70385e-06	0.000245447	ENSMUST00000068387	Ep300	LastExon
16239	peak_16239	chr16	4084047	4085897	11.9923	-	4084047	4085897	0	1	1850	0	4162	113788	4542	89488	5.11245	3.92334	-1.11304	7.69783e-06	0.000245447	ENSMUST00000205765	Crebbp	UTR3
2392	peak_2392	chr2	121138322	121139497	11.9874	-	121138322	121139497	0	1	1175	0	266	6191	440	5399	5.74804	4.32132	-1.32203	7.745e-06	0.000246286	ENSMUST00000110674	Lcmt2	UTR3
1882	peak_1882	chr2	164825515	164825990	11.987	+	164825515	164825990	0	1	475	0	149	2243	255	2057	4.05883	2.43864	-1.49106	7.77324e-06	0.000246353	ENSMUST00000017908	Zswim1	LastExon
4013	peak_4013	chr4	109980145	109983190	11.987	+	109980145	109983190	0	2	2641586	0,1459	1829	33685	2228	20507	3.83914	2.14242	-1.55909	7.77124e-06	0.000246353	ENSMUST00000061187	Dmrta2	LastExon
6611	peak_6611	chr6	115791807	115795811	11.9815	+	115791807	115795811	0	2	1364,36	0,3968	977	19598	992	12618	4.33294	2.95676	-1.27779	7.81591e-06	0.00024729	ENSMUST00000075995	Cand2	Exon
9669	peak_9669	chr9	4384930	4385605	11.9702	+	4384930	4385605	0	1	675	0	1035	26438	1376	19614	5.86133	4.49658	-1.27944	7.89051e-06	0.000249232	ENSMUST00000047173	Msantd4	LastExon
3625	peak_3625	chr3	115712532	115712932	11.9675	-	115712532	115712932	0	1	400	0	141	6168	247	5650	6.55424	5.03403	-1.40354	7.93197e-06	0.000249705	ENSMUST00000055676	S1pr1	LastExon
14794	peak_14794	chr14	75343625	75344250	11.9675	+	75343625	75344250	0	1	625	0	495	4465	538	2300	4.40793	2.95322	-1.34466	7.91972e-06	0.000249705	ENSMUST00000228470	Zc3h13	UTR5
8270	peak_8270	chr7	78517425	78577667	11.9653	-	78517425	78577667	0	2	68132	0,60110	413	2508	307	932	3.38659	1.7394	-1.51548	7.95727e-06	0.000250084	ENSMUST00000155795	Ntrk3	UTR3
1437	peak_1437	chr2	69795560	69795985	11.9541	+	69795560	69795985	0	1	425	0	165	4383	295	3022	5.95537	4.28255	-1.53685	8.05477e-06	0.00025204	ENSMUST00000180290	Phospho2	LastExon
4767	peak_4767	chr4	132727296	132728046	11.9541	-	132727296	132728046	0	1	750	0	33	1604	74	1294	6.65523	4.57446	-1.89138	8.03355e-06	0.00025204	ENSMUST00000045550	Xkr8	UTR3
15030	peak_15030	chr14	60965933	60966433	11.9541	-	60965933	60966433	0	1	500	0	612	24320	880	13981	6.5018	4.65415	-1.69236	8.05961e-06	0.00025204	ENSMUST00000111234	Tnfrsf19	UTR3
6749	peak_6749	chr6	149518999	149519174	11.9401	+	149518999	149519174	0	1	175	0	280	2067	261	927	3.95467	2.33019	-1.49636	8.15166e-06	0.000254497	ENSMUST00000174886	Bicd1	UTR5
5545	peak_5545	chr5	135244210	135244685	11.9333	+	135244210	135244685	0	1	475	0	1692	18691	1805	10898	4.16849	2.62842	-1.42109	8.20351e-06	0.000255692	ENSMUST00000002825	Baz1b	LastExon
7202	peak_7202	chr6	149041597	149044882	11.9311	-	149041597	149044882	0	2	150400	0,2885	424	14757	510	9354	6.35464	4.98626	-1.26929	8.24334e-06	0.000256087	ENSMUST00000150436	Dennd5b	UTR3
10234	peak_10234	chr9	15914504	15915604	11.9311	-	15914504	15915604	0	1	1100	0	1161	40859	1035	18397	6.23989	4.69589	-1.4242	8.23777e-06	0.000256087	ENSMUST00000082170	Fat3	UTR3
14498	peak_14498	chr13	111426204	111426429	11.9256	-	111426204	111426429	0	1	225	0	195	1712	258	910	4.16115	2.77835	-1.28192	8.28858e-06	0.000257069	ENSMUST00000136471	Gpbp1	UTR3
7244	peak_7244	chr7	12848786	12848861	11.9237	+	12848786	12848861	0	1	75	0	93	602	122	275	3.82455	1.75616	-1.88224	8.31273e-06	0.000257394	ENSMUST00000168247	Zfp110	LastExon
9096	peak_9096	chr8	120488823	120489123	11.9053	+	120488823	120489123	0	1	300	0	188	1245	202	789	3.63907	2.20665	-1.32631	8.46118e-06	0.000260707	ENSMUST00000034279	Gse1	UTR5
13509	peak_13509	chr12	20876763	20876988	11.9053	-	20876763	20876988	0	1	225	0	22	544	50	319	5.72746	3.12628	-2.34692	8.45229e-06	0.000260707	ENSMUST00000127917	3110053B16Rik	UTR3
16920	peak_16920	chr17	87985944	87986219	11.9053	+	87985944	87986219	0	1	275	0	418	3096	458	1895	4.08235	2.735	-1.253	8.45669e-06	0.000260707	ENSMUST00000005503	Msh6	Exon
4012	peak_4012	chr4	109978077	109980020	11.8935	+	109978077	109980020	0	2	259166	0,1777	825	10427	1041	7835	3.09863	1.68342	-1.31428	8.54469e-06	0.00026285	ENSMUST00000061187	Dmrta2	UTR5
5947	peak_5947	chr5	100654972	100655022	11.8895	-	100654972	100655022	0	1	50	0	84	634	97	278	3.95476	1.96536	-1.81271	8.58218e-06	0.000263574	ENSMUST00000031262	Coq2	UTR3
6539	peak_6539	chr6	86989067	86989117	11.8854	+	86989067	86989117	0	1	50	0	73	591	94	234	4.14183	1.88407	-2.04855	8.62086e-06	0.000264331	ENSMUST00000003710	Aak1	UTR3
8528	peak_8528	chr7	127866019	127868386	11.8827	-	127866019	127868386	0	2	1344631	0,1736	1075	18913	1095	13767	4.48767	3.28212	-1.1302	8.66128e-06	0.000264827	ENSMUST00000106262	Zfp668	UTR3
10616	peak_10616	chr9	96943856	96944556	11.8827	-	96943856	96944556	0	1	700	0	438	11351	622	9325	5.77996	4.39575	-1.28355	8.66512e-06	0.000264827	ENSMUST00000159298	Spsb4	UTR3
14661	peak_14661	chr14	54368385	54368785	11.8809	+	54368385	54368785	0	1	400	0	342	4802	406	3359	4.85979	3.51312	-1.25057	8.68949e-06	0.000265142	ENSMUST00000228719	Oxa1l	UTR3
1915	peak_1915	chr2	172375914	172377616	11.8794	+	172375914	172377616	0	3	1,198,1	0,137,1701	289	1595	398	918	3.70766	1.9458	-1.61547	8.71277e-06	0.000265423	ENSMUST00000116375	Cstf1	Exon
106	peak_106	chr1	52649850	52650275	11.8735	+	52649850	52650275	0	1	425	0	105	2880	127	1406	5.97801	4.19586	-1.63125	8.78814e-06	0.000266515	ENSMUST00000185790	Nemp2	UTR3
1919	peak_1919	chr2	173034015	173034290	11.8735	+	173034015	173034290	0	1	275	0	210	2160	287	1552	3.69538	2.02987	-1.53007	8.77501e-06	0.000266515	ENSMUST00000173979	Rbm38	UTR3
7389	peak_7389	chr7	28268505	28269165	11.8735	+	28268505	28269165	0	1	660	0	839	30059	1060	22544	6.35007	5.0718	-1.19035	8.79103e-06	0.000266515	ENSMUST00000059596	Eid2	LastExon
4419	peak_4419	chr4	41738917	41739342	11.872	-	41738917	41739342	0	1	425	0	193	4983	270	3096	5.76698	3.98659	-1.63051	8.81409e-06	0.000266785	ENSMUST00000148223	Sigmar1	UTR3
1827	peak_1827	chr2	156307439	156308339	11.872	+	156307439	156308339	0	1	900	0	515	21252	596	12653	6.58312	5.16029	-1.31789	8.82843e-06	0.000266791	ENSMUST00000037401	Phf20	UTR3
3875	peak_3875	chr4	55012594	55012969	11.8675	+	55012594	55012969	0	1	375	0	1324	7601	1194	4256	3.43409	2.11534	-1.2262	8.86999e-06	0.000267618	ENSMUST00000079605	Zfp462	Exon
7338	peak_7338	chr7	25080356	25081456	11.8622	+	25080356	25081456	0	1	1100	0	762	8442	986	7950	3.59334	2.40552	-1.11129	8.91707e-06	0.000268609	ENSMUST00000053410	Zfp574	LastExon
13995	peak_13995	chr13	60760826	60762001	11.8609	+	60760826	60762001	0	1	1175	0	958	19613	997	12052	4.77606	3.30304	-1.36483	8.93918e-06	0.000268846	ENSMUST00000077453	Dapk1	LastExon
4402	peak_4402	chr4	40261025	40261850	11.8552	-	40261025	40261850	0	1	825	0	1634	11541	2009	9228	4.04666	2.99185	-0.993055	8.98891e-06	0.00026991	ENSMUST00000042575	Topors	LastExon
909	peak_909	chr1	134077044	134077519	11.8545	-	134077044	134077519	0	1	475	0	739	8826	789	5957	4.70099	3.46499	-1.15309	9.01792e-06	0.000270043	ENSMUST00000020692	Btg2	UTR3
7397	peak_7397	chr7	28466734	28467483	11.8545	+	28466734	28467483	0	1	749	0	208	5695	275	4702	4.47038	3.08644	-1.28441	9.02198e-06	0.000270043	ENSMUST00000108288	Lrfn1	LastExon
18239	peak_18239	chr19	23720090	23720490	11.8432	+	23720090	23720490	0	1	400	0	153	5262	250	3220	6.33262	4.38572	-1.77664	9.10773e-06	0.000272178	ENSMUST00000099560	Ptar1	LastExon
7523	peak_7523	chr7	51862339	51862539	11.8346	+	51862339	51862539	0	1	200	0	95	1451	120	811	4.76229	2.92878	-1.67565	9.18719e-06	0.000273801	ENSMUST00000107589	Gas2	UTR5
12903	peak_12903	chr11	98153853	98154078	11.8346	-	98153853	98154078	0	1	225	0	204	1648	247	913	4.25837	2.66534	-1.47229	9.19108e-06	0.000273801	ENSMUST00000107545	Med1	UTR3
7993	peak_7993	chr7	16916628	16916903	11.8313	-	16916628	16916903	0	1	275	0	2331	13065	2348	8986	3.07736	1.84493	-1.14999	9.22675e-06	0.00027443	ENSMUST00000172594	Calm3	UTR3
5246	peak_5246	chr5	88555482	88556057	11.8275	+	88555482	88556057	0	1	575	0	793	16172	1014	11291	5.59754	4.36543	-1.14886	9.26537e-06	0.000275145	ENSMUST00000090413	Utp3	LastExon
581	peak_581	chr1	20803173	20803348	11.8264	-	20803173	20803348	0	1	175	0	314	2458	335	1169	3.91599	2.13556	-1.62924	9.28691e-06	0.000275351	ENSMUST00000191061	Mcm3	UTR3
10865	peak_10865	chr10	41451528	41455112	11.8204	+	41451528	41455112	0	2	540,85	0,3499	267	11162	375	8362	6.37069	4.8591	-1.39187	9.34079e-06	0.000276514	ENSMUST00000216656	Zbtb24	LastExon
468	peak_468	chr1	172370178	172370853	11.819	+	172370178	172370853	0	1	675	0	85	3093	91	1510	6.32865	4.62961	-1.55865	9.39382e-06	0.00027678	ENSMUST00000056136	Kcnj10	UTR3
13841	peak_13841	chr13	21368946	21369821	11.819	+	21368946	21369821	0	1	875	0	262	11307	337	7270	6.67067	5.27558	-1.29277	9.38685e-06	0.00027678	ENSMUST00000099720	Zscan12	LastExon
14793	peak_14793	chr14	75331840	75335996	11.819	+	75331840	75335996	0	2	378,72	0,4084	2415	51515	2340	29129	5.48474	4.13689	-1.2524	9.38763e-06	0.00027678	ENSMUST00000227049	Zc3h13	Exon
6821	peak_6821	chr6	34880425	34880825	11.8164	-	34880425	34880825	0	1	400	0	123	2044	177	1505	4.7209	3.08063	-1.50664	9.4678e-06	0.000277268	ENSMUST00000146968	Wdr91	UTR3
7770	peak_7770	chr7	123000930	123002230	11.8164	+	123000930	123002230	0	1	1300	0	2952	46395	3858	38806	5.1114	3.90177	-1.12951	9.46918e-06	0.000277268	ENSMUST00000205495	Rbbp6	UTR3
11526	peak_11526	chr10	81153565	81154290	11.8164	-	81153565	81154290	0	1	725	0	346	5453	405	4174	3.79564	2.45837	-1.24221	9.42584e-06	0.000277268	ENSMUST00000005064	Pias4	UTR3
13708	peak_13708	chr12	87428789	87429039	11.8164	-	87428789	87429039	0	1	250	0	403	7694	519	5243	5.39788	3.96551	-1.32682	9.4422e-06	0.000277268	ENSMUST00000159079	Alkbh1	UTR3
4354	peak_4354	chr4	9449321	9449596	11.805	-	9449321	9449596	0	1	275	0	301	4291	315	1733	5.02239	3.16527	-1.69568	9.55952e-06	0.000279479	ENSMUST00000108339	Asph	UTR3
1527	peak_1527	chr2	92360280	92360905	11.7861	+	92360280	92360905	0	1	625	0	763	23718	795	13834	5.9877	4.53493	-1.3508	9.70038e-06	0.000283158	ENSMUST00000090586	Phf21a	LastExon
17921	peak_17921	chr18	43577396	43582244	11.785	-	43577396	43582244	0	2	113412	0,4436	658	12406	828	8410	5.2252	3.73682	-1.37355	9.7229e-06	0.000283377	ENSMUST00000082254	Jakmip2	Exon
10033	peak_10033	chr9	106858403	106859596	11.7754	+	106858403	106859596	0	2	684,16	0,1177	598	16388	661	10411	5.77967	4.38506	-1.29078	9.81416e-06	0.000285268	ENSMUST00000161758	Dcaf1	Exon
13658	peak_13658	chr12	81721649	81722399	11.7754	-	81721649	81722399	0	1	750	0	295	10130	315	6397	5.63826	4.18205	-1.34758	9.81803e-06	0.000285268	ENSMUST00000035987	Map3k9	UTR3
17108	peak_17108	chr17	32774710	32775135	11.7588	-	32774710	32775135	0	1	425	0	387	2636	443	1567	3.99034	2.54716	-1.33451	9.94715e-06	0.000288574	ENSMUST00000057501	Zfp871	LastExon
17601	peak_17601	chr18	37518352	37518577	11.7586	+	37518352	37518577	0	1	225	0	5	515	47	519	7.62754	3.80197	-3.42091	9.9638e-06	0.000288614	ENSMUST00000097609	Pcdhb22	UTR5
2568	peak_2568	chr2	155415039	155415739	11.7541	-	155415039	155415739	0	1	700	0	960	20184	1013	14154	5.40859	4.19992	-1.12816	1.00099e-05	0.000289506	ENSMUST00000141928	Ncoa6	UTR3
14553	peak_14553	chr14	21668377	21671277	11.7514	+	21668377	21671277	0	1	2900	0	6109	150080	5573	78408	5.6685	4.2816	-1.28466	1.00444e-05	0.000290056	ENSMUST00000182964	Kat6b	LastExon
6300	peak_6300	chr5	149617297	149617472	11.7511	-	149617297	149617472	0	1	175	0	325	2060	426	1033	3.92509	2.11135	-1.65532	1.00614e-05	0.000290103	ENSMUST00000202089	Hsph1	UTR3
4647	peak_4647	chr4	119225402	119226477	11.7498	-	119225402	119226477	0	1	1075	0	410	10590	447	6569	5.73026	4.31569	-1.30967	1.00863e-05	0.000290377	ENSMUST00000141112	AU022252	UTR3
14210	peak_14210	chr13	41338635	41338810	11.7453	-	41338635	41338810	0	1	175	0	183	1201	248	708	3.74474	1.90806	-1.67887	1.01332e-05	0.000291285	ENSMUST00000225053	Nedd9	UTR3
17994	peak_17994	chr18	68268586	68268836	11.74	-	68268586	68268836	0	1	250	0	238	1393	426	1172	3.74014	2.4092	-1.23559	1.01863e-05	0.000292363	ENSMUST00000042852	Fam210a	UTR3
17127	peak_17127	chr17	33650079	33650254	11.7336	-	33650079	33650254	0	1	175	0	930	4946	804	3115	2.37878	1.1671	-1.13092	1.02466e-05	0.000293647	ENSMUST00000234960	Hnrnpm	UTR3
9407	peak_9407	chr8	79339219	79339669	11.7323	-	79339219	79339669	0	1	450	0	176	6404	236	4036	6.41912	5.02439	-1.29136	1.02715e-05	0.000293916	ENSMUST00000066091	Smad1	UTR3
12448	peak_12448	chr11	3907145	3907595	11.7313	-	3907145	3907595	0	1	450	0	43	1423	69	863	5.64002	3.54612	-1.90045	1.02947e-05	0.000294131	ENSMUST00000051207	Slc35e4	UTR3
7913	peak_7913	chr7	4986406	4993546	11.7287	-	4986406	4993546	0	2	80695	0,6445	545	9037	740	9726	4.42366	3.35629	-1.00271	1.03319e-05	0.000294662	ENSMUST00000108572	Zfp579	UTR3
8128	peak_8128	chr7	35202663	35204140	11.7287	-	35202663	35204140	0	3	6296873	0,265,604	724	15458	801	10969	4.51502	3.15073	-1.26622	1.03601e-05	0.000294662	ENSMUST00000118444	Lrp3	Exon
9656	peak_9656	chr8	125887024	125887274	11.7287	-	125887024	125887274	0	1	250	0	26	735	57	381	5.40191	2.65124	-2.47148	1.03504e-05	0.000294662	ENSMUST00000131127	Pcnx2	Exon
4403	peak_4403	chr4	40262375	40262700	11.7273	-	40262375	40262700	0	1	325	0	519	3165	715	2225	3.85138	2.49002	-1.26225	1.03851e-05	0.000294929	ENSMUST00000042575	Topors	LastExon
13828	peak_13828	chr13	14197676	14198126	11.726	+	14197676	14198126	0	1	450	0	184	3433	217	1898	5.41919	4.08111	-1.24132	1.04124e-05	0.000295211	ENSMUST00000039538	Arid4b	LastExon
15346	peak_15346	chr15	84934968	84935418	11.726	+	84934968	84935418	0	1	450	0	738	17599	1008	13636	5.69119	4.30304	-1.28558	1.04264e-05	0.000295211	ENSMUST00000230411	Nup50	Exon
7649	peak_7649	chr7	96895866	96902893	11.7223	+	96895866	96902893	0	2	401,49	0,6978	832	11617	905	6335	4.874	3.29231	-1.45657	1.04684e-05	0.000295955	ENSMUST00000107165	Tenm4	Exon
15302	peak_15302	chr15	78966535	78973307	11.7165	+	78966535	78973307	0	3	2307,112,56	0,5999,6716	1764	27510	2228	27818	4.16407	3.09072	-1.00852	1.05266e-05	0.000297157	ENSMUST00000140228	Triobp	LastExon
1861	peak_1861	chr2	158785421	158786346	11.7074	+	158785421	158786346	0	1	925	0	334	6371	443	4424	5.21666	3.6476	-1.44249	1.06317e-05	0.00029903	ENSMUST00000151801	Fam83d	UTR5
2211	peak_2211	chr2	59959964	59962229	11.7074	-	59959964	59962229	0	2	141209	0,2056	1433	30993	1322	16258	5.16021	3.69145	-1.35556	1.06406e-05	0.00029903	ENSMUST00000090925	Baz2b	Exon
6884	peak_6884	chr6	56778723	56779898	11.7074	-	56778723	56779898	0	1	1175	0	879	40496	1120	28505	6.76419	5.59481	-1.09236	1.06272e-05	0.00029903	ENSMUST00000114321	Kbtbd2	UTR3
2872	peak_2872	chr3	39009295	39011295	11.7022	+	39009295	39011295	0	1	2000	0	3897	79276	4134	46341	5.2823	3.82462	-1.34582	1.07485e-05	0.000300118	ENSMUST00000061260	Fat4	LastExon
10133	peak_10133	chr9	118484602	118485752	11.7022	+	118484602	118485752	0	1	1150	0	4088	96818	3595	34179	5.81167	4.11508	-1.55415	1.07309e-05	0.000300118	ENSMUST00000035020	Eomes	LastExon
14235	peak_14235	chr13	48490821	48491271	11.7022	-	48490821	48491271	0	1	450	0	188	2230	214	1186	4.32533	2.58631	-1.59048	1.07589e-05	0.000300118	ENSMUST00000110110	Zfp169	LastExon
17893	peak_17893	chr18	37756903	37768126	11.7022	-	37756903	37768126	0	2	208192	0,11031	208	1485	283	1132	3.84152	2.38517	-1.34391	1.07508e-05	0.000300118	ENSMUST00000180922	Gm26672	UTR3
18925	peak_18925	chrX	152272850	152273600	11.7022	+	152272850	152273600	0	1	750	0	1126	19357	1196	13593	4.71137	3.43614	-1.18658	1.07226e-05	0.000300118	ENSMUST00000155793	Kdm5c	LastExon
15826	peak_15826	chr15	97975626	97976101	11.7014	-	97975626	97976101	0	1	475	0	492	7649	668	5728	5.12671	3.71012	-1.31196	1.07809e-05	0.000300287	ENSMUST00000023123	Col2a1	UTR3
1194	peak_1194	chr2	3225039	3227039	11.7	+	3225039	3227039	0	1	2000	0	1170	20478	1843	21455	5.23356	4.0575	-1.09765	1.08928e-05	0.000300574	ENSMUST00000091505	Fam171a1	UTR3
4856	peak_4856	chr4	141475791	141477466	11.7	-	141475791	141477466	0	1	1675	0	2805	32960	2770	25725	4.27663	3.26723	-0.951645	1.0923e-05	0.000300574	ENSMUST00000105786	Spen	Exon
6949	peak_6949	chr6	85446834	85447209	11.7	-	85446834	85447209	0	1	375	0	99	1511	140	902	5.08358	3.29532	-1.63676	1.09346e-05	0.000300574	ENSMUST00000126805	Pradc1	UTR3
7309	peak_7309	chr7	19287108	19287451	11.7	+	19287108	19287451	0	2	45205	0,138	453	4059	441	2074	3.70488	2.09929	-1.47427	1.08282e-05	0.000300574	ENSMUST00000209186	Rtn2	UTR5
8626	peak_8626	chr8	3455006	3455281	11.7	+	3455006	3455281	0	1	275	0	101	992	118	577	4.13043	2.45912	-1.53216	1.09318e-05	0.000300574	ENSMUST00000004684	Arhgef18	UTR3
8754	peak_8754	chr8	45026106	45026631	11.7	+	45026106	45026631	0	1	525	0	783	6649	1193	5111	4.28231	2.77719	-1.38768	1.08836e-05	0.000300574	ENSMUST00000215588	Fat1	Exon
12949	peak_12949	chr11	102480789	102481914	11.7	-	102480789	102481914	0	1	1125	0	1364	19090	1546	13853	4.97024	3.78808	-1.10576	1.08998e-05	0.000300574	ENSMUST00000069673	Gpatch8	UTR3
13275	peak_13275	chr12	75967018	75967418	11.7	+	75967018	75967418	0	1	400	0	1778	8150	1586	4410	3.43558	2.29358	-1.05588	1.09116e-05	0.000300574	ENSMUST00000044217	Syne2	Exon
14325	peak_14325	chr13	67317097	67317497	11.7	-	67317097	67317497	0	1	400	0	37	1041	73	653	6.00425	4.11731	-1.7201	1.08746e-05	0.000300574	ENSMUST00000168892	Zfp595	LastExon
440	peak_440	chr1	165310775	165322292	11.6991	+	165310775	165322292	0	4	218105120857	0,6464,7973,10660	918	27554	991	17511	5.67141	4.2646	-1.29819	1.09575e-05	0.000300766	ENSMUST00000111450	Gpr161	LastExon
1062	peak_1062	chr1	168427888	168431409	11.698	-	168427888	168431409	0	2	54,96	0,3425	416	1785	408	1069	3.08571	1.74892	-1.24025	1.09819e-05	0.000300997	ENSMUST00000176791	Pbx1	UTR3
6192	peak_6192	chr5	136274410	136275335	11.694	-	136274410	136275335	0	1	925	0	889	26041	863	17867	4.84025	3.60759	-1.14925	1.10283e-05	0.000301828	ENSMUST00000163906	Cux1	UTR3
7645	peak_7645	chr7	93080803	93081715	11.691	+	93080803	93081715	0	2	180731	0,181	465	17263	520	12280	6.05038	4.72599	-1.22882	1.10673e-05	0.000302459	ENSMUST00000051179	Fam181b	LastExon
18076	peak_18076	chr18	88868949	88870249	11.6903	-	88868949	88870249	0	1	1300	0	935	33883	1157	24003	6.32677	4.95725	-1.27208	1.10884e-05	0.000302596	ENSMUST00000125362	Socs6	UTR3
7945	peak_7945	chr7	10490353	10490728	11.69	-	10490353	10490728	0	1	375	0	541	3650	607	2081	3.99903	2.60389	-1.29055	1.11067e-05	0.000302657	ENSMUST00000032551	Zik1	LastExon
6566	peak_6566	chr6	95122343	95122618	11.6788	+	95122343	95122618	0	1	275	0	143	1288	217	820	4.42446	2.74792	-1.53396	1.12262e-05	0.000305032	ENSMUST00000119582	Kbtbd8	Exon
15765	peak_15765	chr15	84555322	84556072	11.6788	-	84555322	84556072	0	1	750	0	304	8452	342	6012	5.5085	4.18216	-1.23131	1.12239e-05	0.000305032	ENSMUST00000069476	Rtl6	UTR3
8045	peak_8045	chr7	27656424	27658208	11.6787	-	27656424	27658208	0	3	562,6,357	0,1272,1427	426	9874	515	7252	4.42136	2.97176	-1.33646	1.12588e-05	0.00030504	ENSMUST00000036453	Map3k10	UTR3
18881	peak_18881	chrX	135745025	135745575	11.6787	+	135745025	135745575	0	1	550	0	100	2013	107	937	5.52969	3.82824	-1.55726	1.12486e-05	0.00030504	ENSMUST00000128847	Armcx5	UTR5
9370	peak_9370	chr8	70649135	70649685	11.677	-	70649135	70649685	0	1	550	0	167	6908	206	4305	6.35159	4.75118	-1.46926	1.12888e-05	0.000305413	ENSMUST00000070173	Pgpep1	UTR3
1190	peak_1190	chr1	192897306	192897531	11.6678	-	192897306	192897531	0	1	225	0	100	6494	142	4233	7.14616	5.47917	-1.52691	1.13766e-05	0.000307348	ENSMUST00000016344	Syt14	UTR3
3728	peak_3728	chr4	8751592	8751867	11.6546	+	8751592	8751867	0	1	275	0	770	4345	905	3128	3.057	1.60604	-1.34139	1.15472e-05	0.000310179	ENSMUST00000170457	Chd7	UTR5
5134	peak_5134	chr5	34966517	34975233	11.6546	+	34966517	34975233	0	3	238,70,17	0,8474,8699	814	4798	951	3617	3.45491	2.17386	-1.19149	1.15419e-05	0.000310179	ENSMUST00000128161	Rgs12	UTR5
18077	peak_18077	chr18	88870274	88870774	11.6546	-	88870274	88870774	0	1	500	0	407	13273	537	9409	5.75853	4.20108	-1.4358	1.1534e-05	0.000310179	ENSMUST00000145120	Socs6	LastExon
18659	peak_18659	chr19	59301008	59301583	11.6546	-	59301008	59301583	0	1	575	0	598	11590	898	10034	5.30954	3.90948	-1.2945	1.1517e-05	0.000310179	ENSMUST00000099274	Pdzd8	LastExon
9403	peak_9403	chr8	78506420	78506620	11.6383	-	78506420	78506620	0	1	200	0	192	1335	209	727	4.00712	2.49062	-1.39733	1.16955e-05	0.000313716	ENSMUST00000211719	Rbmxl1	LastExon
1146	peak_1146	chr1	186739569	186739744	11.6382	-	186739569	186739744	0	1	175	0	211	1460	431	1395	3.77394	2.05071	-1.57562	1.17471e-05	0.000313728	ENSMUST00000162336	Rrp15	UTR3
10192	peak_10192	chr9	123479000	123479525	11.6382	+	123479000	123479525	0	1	525	0	213	5883	298	4736	5.28565	3.76817	-1.39652	1.17136e-05	0.000313728	ENSMUST00000216352	Limd1	UTR5
11926	peak_11926	chr11	60538320	60538770	11.6382	+	60538320	60538770	0	1	450	0	1043	8827	1331	8378	2.69738	1.5707	-1.06092	1.17471e-05	0.000313728	ENSMUST00000044250	Alkbh5	UTR5
14557	peak_14557	chr14	25662995	25663720	11.6382	+	25662995	25663720	0	1	725	0	2902	21375	2389	14473	3.39672	2.4245	-0.918249	1.17625e-05	0.000313728	ENSMUST00000007961	Zmiz1	LastExon
994	peak_994	chr1	155928466	155929091	11.6322	-	155928466	155929091	0	1	625	0	441	4817	573	3812	4.65717	3.41576	-1.15566	1.18449e-05	0.000315035	ENSMUST00000138762	Cep350	Exon
15994	peak_15994	chr16	18837298	18839475	11.6322	+	18837298	18839475	0	2	89386	0,1791	129	2140	161	1175	5.06885	3.273	-1.63772	1.18403e-05	0.000315035	ENSMUST00000190776	2510002D24Rik	UTR5
10883	peak_10883	chr10	45158468	45158843	11.6299	+	45158468	45158843	0	1	375	0	482	3428	661	2823	4.01387	2.77425	-1.1539	1.18973e-05	0.000315537	ENSMUST00000099858	Prep	LastExon
11095	peak_11095	chr10	83191548	83191898	11.6299	+	83191548	83191898	0	1	350	0	31	1100	80	1133	6.23754	4.34354	-1.72557	1.18921e-05	0.000315537	ENSMUST00000040110	Chst11	LastExon
1301	peak_1301	chr2	28905037	28905287	11.6259	+	28905037	28905287	0	1	250	0	50	1001	104	582	5.56371	3.21443	-2.1177	1.20185e-05	0.000316413	ENSMUST00000113853	Ddx31	UTR3
4007	peak_4007	chr4	108848731	108849156	11.6259	+	108848731	108849156	0	1	425	0	186	1616	269	1358	4.24381	2.87031	-1.2735	1.19564e-05	0.000316413	ENSMUST00000102738	Kti12	LastExon
4246	peak_4246	chr4	146475328	146475778	11.6259	+	146475328	146475778	0	1	450	0	65	2002	125	1540	5.57189	3.60087	-1.78946	1.20645e-05	0.000316413	ENSMUST00000094493	Gm13241	UTR5
5427	peak_5427	chr5	120627286	120627711	11.6259	+	120627286	120627711	0	1	425	0	523	8102	617	5533	4.53076	3.06544	-1.35269	1.20403e-05	0.000316413	ENSMUST00000202387	Gm43579	UTR3
7267	peak_7267	chr7	16435770	16436420	11.6259	+	16435770	16436420	0	1	650	0	680	6441	789	4660	3.88067	2.49887	-1.27828	1.19986e-05	0.000316413	ENSMUST00000209289	Zc3h4	UTR3
8720	peak_8720	chr8	31128627	31129402	11.6259	+	31128627	31129402	0	1	775	0	421	16965	450	10928	6.17003	4.81661	-1.25158	1.19885e-05	0.000316413	ENSMUST00000217278	Rnf122	LastExon
16529	peak_16529	chr17	8981800	8982350	11.6259	+	8981800	8982350	0	1	550	0	154	2319	145	911	4.91343	3.07368	-1.6755	1.20303e-05	0.000316413	ENSMUST00000149440	Pde10a	UTR3
18158	peak_18158	chr19	8895646	8896346	11.6259	+	8895646	8896346	0	1	700	0	394	6920	517	5385	4.74821	3.31848	-1.3202	1.20484e-05	0.000316413	ENSMUST00000096249	Ints5	LastExon
14254	peak_14254	chr13	53333290	53333640	11.6195	-	53333290	53333640	0	1	350	0	113	2428	132	1134	5.67722	4.04192	-1.49914	1.21352e-05	0.000317825	ENSMUST00000021920	Sptlc1	UTR3
8014	peak_8014	chr7	24229072	24229597	11.6133	-	24229072	24229597	0	1	525	0	24	1036	62	821	6.62423	4.38378	-2.02363	1.22041e-05	0.000319185	ENSMUST00000037448	Zfp109	LastExon
1291	peak_1291	chr2	28450489	28454089	11.6132	+	28450489	28454089	0	1	3600	0	1195	24785	1624	22404	4.87931	3.58042	-1.20992	1.22547e-05	0.000319205	ENSMUST00000189694	Ppp1r26	LastExon
3438	peak_3438	chr3	83919585	83922375	11.6132	-	83919585	83922375	0	2	14436	0,2354	1189	13702	1104	7757	4.69863	3.45841	-1.15429	1.22391e-05	0.000319205	ENSMUST00000194432	Tmem131l	UTR3
6263	peak_6263	chr5	143253821	143255496	11.6132	-	143253821	143255496	0	1	1675	0	731	20028	889	17010	4.40514	3.17391	-1.15404	1.22895e-05	0.000319205	ENSMUST00000197349	Zfp316	UTR3
10550	peak_10550	chr9	72618742	72619520	11.6132	-	72618742	72619520	0	2	501,46	0,732	600	17336	720	11032	6.08428	4.69741	-1.28122	1.22641e-05	0.000319205	ENSMUST00000184373	Gm27232	UTR3
11247	peak_11247	chr10	5800417	5802384	11.6132	-	5800417	5802384	0	3	18,91,516	0,734,1451	706	15256	939	9978	5.67008	4.16855	-1.38523	1.22794e-05	0.000319205	ENSMUST00000019907	Fbxo5	Exon
8141	peak_8141	chr7	37961501	37962494	11.6104	-	37961501	37962494	0	2	196,29	0,964	229	1607	297	1117	3.46904	1.8201	-1.51091	1.23476e-05	0.000319832	ENSMUST00000206581	Uri1	UTR3
14036	peak_14036	chr13	74356524	74357324	11.6104	+	74356524	74357324	0	1	800	0	636	14328	816	9554	5.74964	4.40446	-1.24608	1.23315e-05	0.000319832	ENSMUST00000162376	Ccdc127	LastExon
13432	peak_13432	chr12	110868398	110869098	11.6087	+	110868398	110869098	0	1	700	0	109	3949	166	2989	6.26953	4.66092	-1.47581	1.23793e-05	0.000320215	ENSMUST00000222460	Zfp839	LastExon
3870	peak_3870	chr4	55008694	55008744	11.6053	+	55008694	55008744	0	1	50	0	272	1175	300	827	2.61005	1.20824	-1.29629	1.24254e-05	0.000320967	ENSMUST00000098070	Zfp462	Exon
8192	peak_8192	chr7	45825226	45825951	11.6031	-	45825226	45825951	0	1	725	0	324	10950	449	7865	5.88711	4.27612	-1.47773	1.24613e-05	0.000321454	ENSMUST00000209484	Grwd1	UTR3
15076	peak_15076	chr14	69796362	69797012	11.6025	-	69796362	69797012	0	1	650	0	506	6325	625	5322	3.99125	2.72356	-1.17814	1.24837e-05	0.000321592	ENSMUST00000225088	Rhobtb2	UTR3
14529	peak_14529	chr14	8222239	8223114	11.6021	+	8222239	8223114	0	1	875	0	422	9744	558	6863	5.74909	4.37459	-1.27049	1.25208e-05	0.00032167	ENSMUST00000170111	Kctd6	LastExon
16810	peak_16810	chr17	47621194	47621344	11.6021	+	47621194	47621344	0	1	150	0	14	303	34	111	5.58646	2.40047	-2.84496	1.25192e-05	0.00032167	ENSMUST00000120025	Kpna2-ps	UTR3
7360	peak_7360	chr7	27281306	27281681	11.5963	+	27281306	27281681	0	1	375	0	405	7695	387	4984	4.50027	3.20502	-1.2032	1.26121e-05	0.000322975	ENSMUST00000134215	Numbl	UTR5
17744	peak_17744	chr18	75368803	75374968	11.5963	+	75368803	75374968	0	4	765,101,54,55	0,1172,2091,6110	209	7044	322	7073	4.85593	3.51532	-1.2447	1.26174e-05	0.000322975	ENSMUST00000168918	Smad7	UTR5
18367	peak_18367	chr19	46069284	46069684	11.5963	+	46069284	46069684	0	1	400	0	216	3409	269	2372	4.27192	2.69149	-1.45205	1.2623e-05	0.000322975	ENSMUST00000062322	Pprc1	Exon
791	peak_791	chr1	91411882	91412007	11.5962	-	91411882	91412007	0	1	125	0	830	3264	943	2260	2.69974	1.31442	-1.28146	1.26407e-05	0.000322989	ENSMUST00000126136	Hes6	UTR3
12851	peak_12851	chr11	89301437	89302187	11.5956	-	89301437	89302187	0	1	750	0	175	7603	222	5319	5.08682	3.52941	-1.43052	1.2663e-05	0.00032312	ENSMUST00000061728	Nog	LastExon
10223	peak_10223	chr9	14780983	14781558	11.5765	-	14780983	14781558	0	1	575	0	190	5712	244	3534	6.14464	4.64596	-1.3784	1.28496e-05	0.00032744	ENSMUST00000216037	Ankrd49	UTR3
6302	peak_6302	chr5	150650695	150661884	11.5684	-	150650695	150661884	0	2	44606	0,10583	768	14944	897	9542	5.52504	4.3254	-1.11802	1.29396e-05	0.000329287	ENSMUST00000144378	N4bp2l2	UTR3
10051	peak_10051	chr9	107900237	107900487	11.5601	+	107900237	107900487	0	1	250	0	152	1389	174	859	3.46833	1.85069	-1.48296	1.30318e-05	0.000331186	ENSMUST00000035202	Mon1a	Exon
1103	peak_1103	chr1	176769861	176774749	11.5519	-	176769861	176774749	0	2	9316	0,4572	1348	7168	1263	4118	3.64281	2.54686	-1.02703	1.31233e-05	0.000333064	ENSMUST00000193098	Cep170	UTR3
6251	peak_6251	chr5	142885424	142886624	11.5512	-	142885424	142886624	0	1	1200	0	322	11350	422	9724	5.23103	3.86888	-1.26047	1.31471e-05	0.000333219	ENSMUST00000156725	Fbxl18	UTR3
605	peak_605	chr1	33777103	33777353	11.548	-	33777103	33777353	0	1	250	0	369	2695	614	2364	4.07913	2.66224	-1.30997	1.31942e-05	0.000333965	ENSMUST00000139143	Zfp451	UTR3
12555	peak_12555	chr11	36046945	36047370	11.546	-	36046945	36047370	0	1	425	0	159	1897	171	834	4.52027	2.61329	-1.73325	1.32305e-05	0.000334434	ENSMUST00000057207	Tenm2	Exon
1153	peak_1153	chr1	189646897	189648802	11.545	-	189646897	189648802	0	2	83192	0,1713	893	5471	974	3194	3.78147	2.36956	-1.30439	1.33115e-05	0.000334657	ENSMUST00000171929	Cenpf	Exon
4335	peak_4335	chr4	155957245	155957670	11.545	+	155957245	155957670	0	1	425	0	414	14293	497	8648	6.18227	4.60279	-1.44864	1.3344e-05	0.000334657	ENSMUST00000124092	Ube2j2	UTR5
4401	peak_4401	chr4	40259975	40260850	11.545	-	40259975	40260850	0	1	875	0	1193	21890	1574	16278	5.44988	4.26255	-1.10708	1.33336e-05	0.000334657	ENSMUST00000042575	Topors	UTR3
11765	peak_11765	chr11	24172998	24173173	11.545	+	24172998	24173173	0	1	175	0	536	2477	852	1791	3.44141	1.98127	-1.34816	1.33212e-05	0.000334657	ENSMUST00000118955	Bcl11a	UTR3
13800	peak_13800	chr12	112821136	112821786	11.545	-	112821136	112821786	0	1	650	0	578	16435	829	11599	6.05138	4.51975	-1.406	1.33458e-05	0.000334657	ENSMUST00000220899	Cdca4	UTR3
15936	peak_15936	chr16	10840446	10840696	11.545	+	10840446	10840696	0	1	250	0	65	1533	82	749	5.76409	3.88443	-1.71129	1.32713e-05	0.000334657	ENSMUST00000037913	Rmi2	UTR3
599	peak_599	chr1	30804766	30805866	11.5434	-	30804766	30805866	0	1	1100	0	1396	24010	1622	16983	5.29875	4.08367	-1.13372	1.33782e-05	0.000335024	ENSMUST00000191329	Phf3	UTR3
2389	peak_2389	chr2	120739578	120745027	11.5359	-	120739578	120745027	0	2	616,9	0,5440	604	9370	617	5382	5.0264	3.62558	-1.29312	1.34835e-05	0.000336787	ENSMUST00000085840	Ttbk2	UTR3
4194	peak_4194	chr4	136339823	136340123	11.5359	+	136339823	136340123	0	1	300	0	1446	12096	1309	6459	4.30589	3.08952	-1.13259	1.34843e-05	0.000336787	ENSMUST00000182327	Hnrnpr	UTR5
3096	peak_3096	chr3	98425274	98429085	11.5247	+	98425274	98429085	0	2	2261924	0,1887	804	15968	1107	16725	4.43468	3.31188	-1.05061	1.36071e-05	0.000339402	ENSMUST00000056096	Zfp697	LastExon
19104	peak_19104	chrX	103962237	103963187	11.5146	-	103962237	103963187	0	1	950	0	1323	13628	1651	9489	4.61232	3.40852	-1.11985	1.37208e-05	0.000341788	ENSMUST00000070705	Rlim	UTR3
2004	peak_2004	chr2	18047041	18047941	11.5144	-	18047041	18047941	0	1	900	0	963	22440	1075	17765	4.27285	3.06728	-1.12795	1.37406e-05	0.00034183	ENSMUST00000091420	Skida1	LastExon
161	peak_161	chr1	63309742	63310067	11.5122	+	63309742	63310067	0	1	325	0	238	4049	302	2583	5.29188	3.79272	-1.3812	1.378e-05	0.000342359	ENSMUST00000029025	Zdbf2	LastExon
13206	peak_13206	chr12	52516176	52516901	11.5121	+	52516176	52516901	0	1	725	0	1110	35924	1566	27985	6.12923	5.13017	-0.943733	1.37992e-05	0.000342383	ENSMUST00000110725	Arhgap5	UTR5
17526	peak_17526	chr18	37185862	37185987	11.5084	+	37185862	37185987	0	1	125	0	83	574	134	349	4.01031	2.17185	-1.66987	1.38528e-05	0.000343263	ENSMUST00000047479	Pcdhac2	UTR3
418	peak_418	chr1	156641129	156642979	11.5058	+	156641129	156642979	0	1	1850	0	908	22342	954	14903	5.39506	4.0697	-1.22765	1.38959e-05	0.000343878	ENSMUST00000027888	Abl2	LastExon
18125	peak_18125	chr19	6298266	6298541	11.5055	+	6298266	6298541	0	1	275	0	841	3607	1079	3374	2.76508	1.61667	-1.07271	1.39168e-05	0.000343943	ENSMUST00000025684	Ehd1	LastExon
6533	peak_6533	chr6	86445473	86445848	11.4977	+	86445473	86445848	0	1	375	0	75	1151	96	642	4.77781	2.90978	-1.69866	1.40112e-05	0.000345824	ENSMUST00000203568	C87436	LastExon
10451	peak_10451	chr9	57258177	57258902	11.4835	-	57258177	57258902	0	1	725	0	130	2310	217	2445	4.44695	3.02767	-1.30908	1.41739e-05	0.000349234	ENSMUST00000213199	1700017B05Rik	LastExon
11096	peak_11096	chr10	83365826	83366301	11.4835	+	83365826	83366301	0	1	475	0	467	10526	507	5152	5.71017	4.098	-1.47662	1.42371e-05	0.000349234	ENSMUST00000020488	D10Wsu102e	LastExon
14071	peak_14071	chr13	97126607	97127232	11.4835	+	97126607	97127232	0	1	625	0	158	2671	216	1430	5.32688	3.59397	-1.58015	1.42148e-05	0.000349234	ENSMUST00000042517	Fam169a	LastExon
17426	peak_17426	chr18	22522194	22522844	11.4835	+	22522194	22522844	0	1	650	0	195	2744	249	1886	5.02907	3.68489	-1.24332	1.42084e-05	0.000349234	ENSMUST00000097655	Asxl3	LastExon
17664	peak_17664	chr18	52868628	52871422	11.4835	+	52868628	52871422	0	2	779121	0,2673	919	11709	930	7739	4.75325	3.56099	-1.11093	1.4242e-05	0.000349234	ENSMUST00000179625	Sncaip	Exon
5369	peak_5369	chr5	112370087	112374972	11.477	+	112370087	112374972	0	2	657,93	0,4792	160	3714	237	3127	4.61065	3.06837	-1.41123	1.43811e-05	0.00035082	ENSMUST00000133708	Hps4	UTR5
8005	peak_8005	chr7	19564945	19565445	11.477	-	19564945	19565445	0	1	500	0	267	11941	416	10298	6.38649	4.89513	-1.37303	1.4381e-05	0.00035082	ENSMUST00000122055	Gemin7	UTR3
13501	peak_13501	chr12	15793251	15794051	11.477	-	15793251	15794051	0	1	800	0	1475	35494	1972	31665	5.69417	4.5479	-1.07128	1.43396e-05	0.00035082	ENSMUST00000221518	Trib2	UTR3
16731	peak_16731	chr17	35124560	35124810	11.477	+	35124560	35124810	0	1	250	0	161	2907	237	1955	5.04507	3.26554	-1.62128	1.43809e-05	0.00035082	ENSMUST00000052167	Gpank1	LastExon
7461	peak_7461	chr7	43574416	43575166	11.4766	+	43574416	43575166	0	1	750	0	180	3168	235	2054	5.38363	3.91642	-1.35039	1.44168e-05	0.000350903	ENSMUST00000005597	Zfp658	LastExon
16724	peak_16724	chr17	34896622	34896842	11.4766	+	34896622	34896842	0	1	220	0	1478	9616	1930	8963	3.56022	2.41838	-1.06947	1.44403e-05	0.000350903	ENSMUST00000052778	Zbtb12	UTR3
18492	peak_18492	chr19	6116003	6116403	11.4766	-	6116003	6116403	0	1	400	0	178	7929	291	6016	6.31706	4.50752	-1.64554	1.44287e-05	0.000350903	ENSMUST00000113533	Sac3d1	UTR3
4845	peak_4845	chr4	140514609	140515409	11.4733	-	140514609	140515409	0	1	800	0	496	9157	484	6092	4.81889	3.57223	-1.15988	1.44926e-05	0.000351721	ENSMUST00000039204	Arhgef10l	UTR3
16493	peak_16493	chr16	97951259	97951584	11.4732	-	97951259	97951584	0	1	325	0	295	2255	355	1461	4.15909	2.76657	-1.28545	1.45124e-05	0.000351748	ENSMUST00000063605	Zbtb21	LastExon
18157	peak_18157	chr19	8895121	8895596	11.4537	+	8895121	8895596	0	1	475	0	196	2461	279	2037	4.31726	2.84298	-1.35707	1.47286e-05	0.000356531	ENSMUST00000096249	Ints5	LastExon
6099	peak_6099	chr5	123700076	123701051	11.4328	-	123700076	123701051	0	1	975	0	862	19129	963	12973	5.39366	4.02816	-1.26368	1.49623e-05	0.000361722	ENSMUST00000199875	Zcchc8	UTR3
10250	peak_10250	chr9	20435946	20437996	11.4197	-	20435946	20437996	0	1	2050	0	1130	41078	1195	23493	6.41513	5.23352	-1.10098	1.51191e-05	0.00036502	ENSMUST00000098970	Zfp26	UTR3
11637	peak_11637	chr10	119210803	119211803	11.4197	-	119210803	119211803	0	1	1000	0	1554	19682	1865	15272	4.86277	3.70961	-1.07642	1.51374e-05	0.00036502	ENSMUST00000020315	Cand1	Exon
509	peak_509	chr1	180862544	180866449	11.4188	+	180862544	180866449	0	2	297378	0,3527	521	12009	655	8107	5.62972	4.17764	-1.3416	1.52154e-05	0.000365257	ENSMUST00000038091	Sde2	LastExon
4154	peak_4154	chr4	131901045	131901620	11.4188	+	131901045	131901620	0	1	575	0	1256	11028	1285	7700	4.26911	3.15816	-1.03911	1.52321e-05	0.000365257	ENSMUST00000124738	Gm12992	UTR3
4377	peak_4377	chr4	26340476	26340901	11.4188	-	26340476	26340901	0	1	425	0	64	1737	123	1086	5.99529	4.00855	-1.79886	1.52478e-05	0.000365257	ENSMUST00000133105	Manea	UTR3
8489	peak_8489	chr7	127203673	127208228	11.4188	-	127203673	127208228	0	3	21100779	0,67,3776	796	15104	906	12022	4.28704	3.05324	-1.14701	1.51741e-05	0.000365257	ENSMUST00000120705	Tbc1d10b	Exon
11762	peak_11762	chr11	24085360	24085560	11.4188	+	24085360	24085560	0	1	200	0	1703	6066	1720	4560	2.79565	1.73024	-0.999147	1.52634e-05	0.000365257	ENSMUST00000118955	Bcl11a	UTR5
11879	peak_11879	chr11	58059605	58060180	11.4188	+	58059605	58060180	0	1	575	0	348	9438	397	6265	5.85603	4.51386	-1.23901	1.52602e-05	0.000365257	ENSMUST00000178636	Larp1	UTR3
7209	peak_7209	chr7	3640872	3641497	11.4106	+	3640872	3641497	0	1	625	0	430	6314	487	3747	5.04282	3.57224	-1.35314	1.53703e-05	0.000367347	ENSMUST00000108636	Prpf31	LastExon
8659	peak_8659	chr8	13878024	13878349	11.4065	+	13878024	13878349	0	1	325	0	270	2303	396	2055	3.58453	2.09899	-1.36754	1.54432e-05	0.000368376	ENSMUST00000128557	Champ1	LastExon
11820	peak_11820	chr11	49217631	49218081	11.4065	+	49217631	49218081	0	1	450	0	308	2607	390	1339	4.10748	2.7517	-1.25337	1.54524e-05	0.000368376	ENSMUST00000061757	Zfp62	LastExon
1540	peak_1540	chr2	97629590	97631265	11.4063	+	97629590	97631265	0	1	1675	0	226	9196	357	5829	6.58372	4.91379	-1.52404	1.54745e-05	0.000368438	ENSMUST00000059049	Lrrc4c	LastExon
15325	peak_15325	chr15	81600923	81608349	11.4012	+	81600923	81608349	0	2	622153	0,7273	817	13203	950	9026	5.06743	3.68673	-1.27651	1.55484e-05	0.00036973	ENSMUST00000189338	Ep300	UTR5
6183	peak_6183	chr5	135910583	135911458	11.3975	-	135910583	135911458	0	1	875	0	6913	59972	7756	45689	3.78617	2.55447	-1.14484	1.56083e-05	0.000370688	ENSMUST00000055808	Ywhag	UTR3
2993	peak_2993	chr3	88820275	88821000	11.3921	+	88820275	88821000	0	1	725	0	552	3724	549	2417	3.71102	2.45664	-1.16411	1.57259e-05	0.000372074	ENSMUST00000183707	1500004A13Rik	UTR3
9352	peak_9352	chr8	70110139	70110414	11.3921	-	70110139	70110414	0	1	275	0	1011	5952	794	3182	2.85314	1.56876	-1.19075	1.5709e-05	0.000372074	ENSMUST00000002412	Ncan	Exon
16918	peak_16918	chr17	87984544	87985119	11.3921	+	87984544	87985119	0	1	575	0	1197	15568	1381	11220	4.82591	3.56327	-1.17156	1.57222e-05	0.000372074	ENSMUST00000005503	Msh6	Exon
13521	peak_13521	chr12	28737822	28746396	11.3884	-	28737822	28746396	0	2	27,98	0,8476	150	778	199	488	3.299	1.59432	-1.55691	1.5786e-05	0.000373028	ENSMUST00000221335	Trappc12	UTR3
9036	peak_9036	chr8	109940347	109941122	11.3808	+	109940347	109941122	0	1	775	0	287	10143	354	7012	5.90954	4.41364	-1.37517	1.58896e-05	0.000375006	ENSMUST00000034175	Phlpp2	LastExon
673	peak_673	chr1	58463520	58463895	11.3803	-	58463520	58463895	0	1	375	0	317	6200	389	3252	5.52778	3.98886	-1.41372	1.59283e-05	0.000375145	ENSMUST00000027198	Orc2	UTR3
10369	peak_10369	chr9	44807579	44808079	11.3803	-	44807579	44808079	0	1	500	0	389	5443	434	3015	4.91615	3.33005	-1.45611	1.59353e-05	0.000375145	ENSMUST00000002095	Kmt2a	UTR3
6835	peak_6835	chr6	38818135	38819185	11.3798	-	38818135	38819185	0	1	1050	0	2551	26519	2832	20136	4.49069	3.35868	-1.05725	1.59799e-05	0.000375259	ENSMUST00000114855	Hipk2	UTR3
10237	peak_10237	chr9	15947543	15960068	11.3798	-	15947543	15960068	0	2	25325	0,12200	303	2702	302	1245	4.01954	2.24876	-1.61248	1.59696e-05	0.000375259	ENSMUST00000082170	Fat3	Exon
156	peak_156	chr1	63306242	63306492	11.3781	+	63306242	63306492	0	1	250	0	322	1715	440	1120	3.65974	2.24442	-1.30429	1.60986e-05	0.000375706	ENSMUST00000029025	Zdbf2	LastExon
2799	peak_2799	chr3	9250626	9279966	11.3781	+	9250626	9279966	0	4	1454,886,99,11	0,13908,27627,29329	1136	27932	1598	27959	4.80116	3.57735	-1.139	1.60616e-05	0.000375706	ENSMUST00000155203	Zbtb10	UTR5
5627	peak_5627	chr5	143247338	143247988	11.3781	+	143247338	143247988	0	1	650	0	209	4311	249	2345	5.59351	4.01226	-1.44879	1.60675e-05	0.000375706	ENSMUST00000075916	Zfp12	UTR3
9312	peak_9312	chr8	48276192	48276617	11.3781	-	48276192	48276617	0	1	425	0	477	7258	605	4735	4.97437	3.42525	-1.42002	1.60885e-05	0.000375706	ENSMUST00000145344	Tenm3	UTR3
9481	peak_9481	chr8	93972737	93973087	11.3781	-	93972737	93973087	0	1	350	0	527	2815	578	2003	3.48716	2.28146	-1.1228	1.60655e-05	0.000375706	ENSMUST00000139702	Amfr	UTR3
4437	peak_4437	chr4	44036799	44037324	11.3736	-	44036799	44037324	0	1	525	0	130	3938	180	2783	5.66142	4.01291	-1.50526	1.61735e-05	0.000376871	ENSMUST00000173234	Gne	UTR3
5688	peak_5688	chr5	150543173	150547985	11.3736	+	150543173	150547985	0	3	284,96,45	0,1721,4767	208	6487	263	3340	6.18999	4.59581	-1.45903	1.61973e-05	0.000376871	ENSMUST00000202313	Brca2	Exon
8109	peak_8109	chr7	30362086	30362761	11.3736	-	30362086	30362761	0	1	675	0	144	2592	210	2202	5.06894	3.62051	-1.33203	1.62085e-05	0.000376871	ENSMUST00000046351	Lrfn3	UTR5
3957	peak_3957	chr4	98930987	98931312	11.3697	+	98930987	98931312	0	1	325	0	1564	10657	1856	6697	4.00686	2.76908	-1.14964	1.62723e-05	0.000377889	ENSMUST00000091358	Usp1	Exon
8889	peak_8889	chr8	79192522	79192747	11.3694	+	79192522	79192747	0	1	225	0	132	1110	172	653	4.29471	2.68236	-1.48071	1.62962e-05	0.000377979	ENSMUST00000145827	Zfp827	UTR3
635	peak_635	chr1	43049318	43049693	11.3686	-	43049318	43049693	0	1	375	0	118	2394	146	1523	5.09054	3.45112	-1.49981	1.63257e-05	0.000378199	ENSMUST00000186694	Tgfbrap1	UTR3
11948	peak_11948	chr11	62118938	62128230	11.3684	+	62118938	62128230	0	2	344,31	0,9261	389	3701	481	2577	4.48354	3.21165	-1.18141	1.63472e-05	0.000378233	ENSMUST00000201866	Specc1	UTR5
6652	peak_6652	chr6	120766559	120766884	11.3656	+	120766559	120766884	0	1	325	0	256	3604	280	1614	5.05619	3.40701	-1.50758	1.64399e-05	0.000378982	ENSMUST00000100993	Cecr2	UTR3
7595	peak_7595	chr7	79694194	79694569	11.3656	+	79694194	79694569	0	1	375	0	221	2696	273	1687	4.60925	2.94531	-1.5203	1.6436e-05	0.000378982	ENSMUST00000035977	Ticrr	Exon
16337	peak_16337	chr16	32232836	32238567	11.3656	-	32232836	32238567	0	2	432168	0,5563	1426	55473	1511	34730	6.41602	5.11568	-1.20499	1.64305e-05	0.000378982	ENSMUST00000042732	Fbxo45	UTR3
14922	peak_14922	chr14	32082790	32083065	11.3604	-	32082790	32083065	0	1	275	0	256	4425	369	2916	5.34513	3.81092	-1.40659	1.65188e-05	0.000380336	ENSMUST00000144149	Dph3	UTR3
630	peak_630	chr1	39372223	39372573	11.3497	-	39372223	39372573	0	1	350	0	51	1348	80	829	5.81291	3.88702	-1.74693	1.66832e-05	0.000383185	ENSMUST00000192531	Tbc1d8	UTR3
14902	peak_14902	chr14	26668433	26668658	11.3497	-	26668433	26668658	0	1	225	0	94	1251	160	1049	4.27142	2.53422	-1.58225	1.66651e-05	0.000383185	ENSMUST00000052932	Pde12	Exon
2212	peak_2212	chr2	59962254	59962479	11.3487	-	59962254	59962479	0	1	225	0	530	2973	480	1577	3.63223	2.30435	-1.22839	1.67353e-05	0.000383448	ENSMUST00000090925	Baz2b	Exon
11117	peak_11117	chr10	86834412	86835037	11.3487	+	86834412	86835037	0	1	625	0	90	2671	136	1879	5.92807	4.24643	-1.53345	1.67261e-05	0.000383448	ENSMUST00000099396	Nt5dc3	UTR3
10171	peak_10171	chr9	121767664	121768189	11.3397	+	121767664	121768189	0	1	525	0	227	4598	294	3115	4.33887	2.69435	-1.50227	1.68601e-05	0.000385839	ENSMUST00000213743	Zfp651	UTR5
460	peak_460	chr1	171503877	171504427	11.3276	+	171503877	171504427	0	1	550	0	151	2649	232	2076	5.19314	3.5917	-1.4652	1.7023e-05	0.000389094	ENSMUST00000081527	Alyref2	LastExon
2840	peak_2840	chr3	32933222	32933622	11.3222	+	32933222	32933622	0	1	400	0	48	1893	87	1199	6.54256	4.65706	-1.70815	1.71077e-05	0.000390557	ENSMUST00000072312	Usp13	LastExon
268	peak_268	chr1	92919680	92920530	11.3183	+	92919680	92920530	0	1	850	0	473	12113	573	8808	4.98954	3.55319	-1.32493	1.71744e-05	0.000391606	ENSMUST00000178816	Rnpepl1	UTR5
4864	peak_4864	chr4	141763188	141763813	11.3151	-	141763188	141763813	0	1	625	0	100	2290	157	1932	5.14802	3.55059	-1.46132	1.72334e-05	0.000392477	ENSMUST00000038014	Dnajc16	UTR3
3042	peak_3042	chr3	90487756	90487931	11.3057	+	90487756	90487931	0	1	175	0	394	1796	393	955	3.38662	2.23373	-1.07498	1.74932e-05	0.000395053	ENSMUST00000001042	Ilf2	UTR3
3447	peak_3447	chr3	86919862	86920312	11.3057	-	86919862	86920312	0	1	450	0	708	17830	734	14166	4.60992	3.50484	-1.03351	1.74909e-05	0.000395053	ENSMUST00000194452	Dclk2	Exon
4188	peak_4188	chr4	136192825	136193150	11.3057	+	136192825	136193150	0	1	325	0	85	1097	162	797	3.96037	1.8872	-1.8713	1.74816e-05	0.000395053	ENSMUST00000061721	E2f2	LastExon
6460	peak_6460	chr6	59210651	59210901	11.3057	+	59210651	59210901	0	1	250	0	45	929	101	680	5.60078	3.66366	-1.75354	1.73977e-05	0.000395053	ENSMUST00000062626	Tigd2	LastExon
8741	peak_8741	chr8	36094902	36099883	11.3057	+	36094902	36099883	0	2	86314	0,4667	337	2876	315	1928	3.30489	2.09992	-1.12128	1.7446e-05	0.000395053	ENSMUST00000145386	Prag1	UTR5
9528	peak_9528	chr8	106883862	106884262	11.3057	-	106883862	106884262	0	1	400	0	511	6314	592	3946	4.57645	3.04012	-1.40877	1.74535e-05	0.000395053	ENSMUST00000175940	Chtf8	UTR3
13620	peak_13620	chr12	75485170	75515720	11.3057	-	75485170	75515720	0	3	54102119	0,8243,30431	390	3500	419	1720	4.3925	2.97095	-1.30988	1.73703e-05	0.000395053	ENSMUST00000218930	Ppp2r5e	UTR3
8324	peak_8324	chr7	92859653	92860103	11.3051	-	92859653	92860103	0	1	450	0	94	1445	162	890	5.19239	3.38409	-1.64442	1.75213e-05	0.000395215	ENSMUST00000032877	Ddias	LastExon
8171	peak_8171	chr7	45028181	45028431	11.3032	-	45028181	45028431	0	1	250	0	436	2789	516	2390	3.20425	2.0268	-1.09685	1.75651e-05	0.000395728	ENSMUST00000210410	Prr12	UTR3
3783	peak_3783	chr4	32562635	32563160	11.3027	+	32562635	32563160	0	1	525	0	698	8065	617	3485	3.8349	2.09846	-1.58356	1.75926e-05	0.000395875	ENSMUST00000171600	Bach2	Exon
3610	peak_3610	chr3	108679387	108679712	11.3023	-	108679387	108679712	0	1	325	0	320	5844	331	3152	5.42736	4.01873	-1.30615	1.76262e-05	0.000395975	ENSMUST00000029482	Gpsm2	UTR3
12974	peak_12974	chr11	106163629	106163979	11.3023	-	106163629	106163979	0	1	350	0	119	3659	166	2422	5.51206	3.75679	-1.59766	1.7639e-05	0.000395975	ENSMUST00000007444	Strada	UTR3
8884	peak_8884	chr8	79060581	79070461	11.2979	+	79060581	79070461	0	2	709,91	0,9789	633	12777	715	10683	5.02196	3.91933	-1.03138	1.77138e-05	0.000397181	ENSMUST00000119254	Zfp827	Exon
14058	peak_14058	chr13	93304631	93308037	11.2922	+	93304631	93308037	0	2	671,4	0,3402	433	7518	444	4152	5.34515	3.96961	-1.26797	1.78052e-05	0.000398756	ENSMUST00000080127	Homer1	UTR5
15535	peak_15535	chr15	39871777	39872402	11.2894	-	39871777	39872402	0	1	625	0	641	32990	728	22089	6.93205	5.7155	-1.12995	1.78609e-05	0.00039953	ENSMUST00000110305	Lrp12	UTR3
11877	peak_11877	chr11	58058655	58059105	11.2829	+	58058655	58059105	0	1	450	0	704	12966	789	8604	5.2226	3.86407	-1.25287	1.79633e-05	0.000401343	ENSMUST00000178636	Larp1	LastExon
1541	peak_1541	chr2	101696711	101697736	11.2808	+	101696711	101697736	0	1	1025	0	502	24288	585	15390	6.74774	5.34816	-1.28641	1.80104e-05	0.00040192	ENSMUST00000004949	Traf6	LastExon
2315	peak_2315	chr2	101952652	101952952	11.265	-	101952652	101952952	0	1	300	0	172	1943	202	1100	4.6629	3.05401	-1.47039	1.82306e-05	0.000406353	ENSMUST00000111222	Ldlrad3	UTR3
13262	peak_13262	chr12	72541416	72541841	11.2633	+	72541416	72541841	0	1	425	0	179	3715	247	2595	5.55395	4.07233	-1.35832	1.82738e-05	0.000406835	ENSMUST00000044352	Pcnx4	UTR5
18600	peak_18600	chr19	43674617	43674717	11.2561	-	43674617	43674717	0	1	100	0	41	584	116	575	3.15906	1.02092	-1.92744	1.83863e-05	0.000408856	ENSMUST00000235953	Slc25a28	UTR3
1232	peak_1232	chr2	18684355	18684830	11.2531	+	18684355	18684830	0	1	475	0	736	8985	718	4567	4.8359	3.61731	-1.11749	1.85501e-05	0.000409723	ENSMUST00000051929	Bmi1	LastExon
1518	peak_1518	chr2	91511675	91512400	11.2531	+	91511675	91512400	0	1	725	0	525	12969	575	7919	5.4873	3.9886	-1.3781	1.8576e-05	0.000409723	ENSMUST00000028689	Lrp4	LastExon
5623	peak_5623	chr5	143244263	143244613	11.2531	+	143244263	143244613	0	1	350	0	257	3378	321	2330	4.51216	2.9941	-1.39295	1.85216e-05	0.000409723	ENSMUST00000075916	Zfp12	UTR3
7646	peak_7646	chr7	96874001	96885336	11.2531	+	96874001	96885336	0	2	530,20	0,11315	1155	11044	1061	4896	4.22519	2.57257	-1.50883	1.8596e-05	0.000409723	ENSMUST00000107165	Tenm4	Exon
8735	peak_8735	chr8	34818679	34819254	11.2531	+	34818679	34819254	0	1	575	0	1112	24395	992	12418	5.60167	4.24737	-1.24931	1.84474e-05	0.000409723	ENSMUST00000033930	Dusp4	LastExon
12148	peak_12148	chr11	84400971	84401346	11.2531	+	84400971	84401346	0	1	375	0	266	4336	262	2424	4.85597	3.37674	-1.35767	1.85329e-05	0.000409723	ENSMUST00000020843	Acaca	UTR3
12942	peak_12942	chr11	102306059	102306409	11.2531	-	102306059	102306409	0	1	350	0	654	6856	674	4429	4.0803	2.73074	-1.24506	1.85991e-05	0.000409723	ENSMUST00000107119	Ubtf	UTR3
14847	peak_14847	chr14	120947026	120947301	11.2531	+	120947026	120947301	0	1	275	0	917	5183	1014	3045	3.62479	2.12681	-1.37457	1.85951e-05	0.000409723	ENSMUST00000032898	Ipo5	UTR3
3029	peak_3029	chr3	89751010	89751360	11.2484	+	89751010	89751360	0	1	350	0	204	2319	228	1387	4.70255	3.30766	-1.28516	1.8681e-05	0.000411046	ENSMUST00000107405	Adar	LastExon
807	peak_807	chr1	97645452	97646277	11.2467	-	97645452	97646277	0	1	825	0	497	12620	589	8535	5.8125	4.46028	-1.24519	1.87243e-05	0.00041152	ENSMUST00000149927	D1Ertd622e	UTR3
1420	peak_1420	chr2	59843479	59844179	11.245	+	59843479	59844179	0	1	700	0	400	10868	572	8366	5.66696	4.1395	-1.40284	1.8853e-05	0.000412025	ENSMUST00000147650	Tanc1	UTR5
2814	peak_2814	chr3	19895360	19895960	11.245	+	19895360	19895960	0	1	600	0	442	8437	597	6925	5.1713	3.81083	-1.25466	1.89002e-05	0.000412025	ENSMUST00000198527	4632415L05Rik	UTR5
9460	peak_9460	chr8	86853267	86861303	11.245	-	86853267	86861303	0	2	22878	0,7158	474	7494	645	5877	5.22231	4.02136	-1.1167	1.88723e-05	0.000412025	ENSMUST00000034074	N4bp1	Exon
12095	peak_12095	chr11	78037174	78037866	11.245	+	78037174	78037866	0	1	692	0	199	3711	304	2841	5.36246	3.80873	-1.42056	1.88093e-05	0.000412025	ENSMUST00000144028	Dhrs13	UTR3
12896	peak_12896	chr11	97716856	97718606	11.245	-	97716856	97718606	0	1	1750	0	2361	44362	2499	29162	5.10982	3.79644	-1.2156	1.88875e-05	0.000412025	ENSMUST00000018691	Pip4k2b	UTR3
13379	peak_13379	chr12	102003203	102003453	11.245	+	102003203	102003453	0	1	250	0	217	2063	275	1059	4.46467	2.88358	-1.44549	1.88375e-05	0.000412025	ENSMUST00000047357	Cpsf2	LastExon
14531	peak_14531	chr14	14100169	14103374	11.245	+	14100169	14103374	0	2	732,68	0,3137	471	9211	497	4967	5.25649	3.65256	-1.46695	1.88494e-05	0.000412025	ENSMUST00000022257	Atxn7	Exon
4907	peak_4907	chr4	149150440	149150590	11.2428	-	149150440	149150590	0	1	150	0	244	1183	397	1232	2.60845	1.23521	-1.26712	1.90023e-05	0.000412658	ENSMUST00000084124	Pgd	UTR3
5863	peak_5863	chr5	52643636	52644011	11.2428	-	52643636	52644011	0	1	375	0	91	2116	122	1219	5.79248	4.16577	-1.48459	1.90869e-05	0.000412658	ENSMUST00000126574	Sepsecs	UTR3
6829	peak_6829	chr6	38191723	38196317	11.2428	-	38191723	38196317	0	2	411934	0,2660	1538	18615	1695	15076	4.61467	3.5627	-0.985767	1.90602e-05	0.000412658	ENSMUST00000169256	D630045J12Rik	Exon
9894	peak_9894	chr9	61416669	61417069	11.2428	+	61416669	61417069	0	1	400	0	655	6400	713	4111	4.16527	2.7551	-1.29816	1.90119e-05	0.000412658	ENSMUST00000159140	Tle3	UTR5
10043	peak_10043	chr9	107570286	107571011	11.2428	+	107570286	107571011	0	1	725	0	413	6403	590	5314	4.40002	2.93108	-1.34857	1.89699e-05	0.000412658	ENSMUST00000195681	Hyal2	LastExon
10372	peak_10372	chr9	44818969	44820969	11.2428	-	44818969	44820969	0	1	2000	0	2584	27893	2497	20531	4.48281	3.48211	-0.940583	1.90671e-05	0.000412658	ENSMUST00000138119	Kmt2a	Exon
14739	peak_14739	chr14	62588431	62607030	11.2428	+	62588431	62607030	0	2	921158	0,17441	435	8536	561	6980	5.40061	4.16777	-1.14121	1.90324e-05	0.000412658	ENSMUST00000039064	Fam124a	LastExon
15133	peak_15133	chr14	103156476	103156601	11.2428	-	103156476	103156601	0	1	125	0	97	701	141	506	3.46806	1.72901	-1.58245	1.91043e-05	0.000412658	ENSMUST00000161278	Mycbp2	LastExon
5953	peak_5953	chr5	101936012	101937395	11.2298	-	101936012	101937395	0	2	61114	0,1269	404	2708	365	1605	3.4769	2.21122	-1.17191	1.92995e-05	0.000416396	ENSMUST00000172512	Wdfy3	UTR3
17828	peak_17828	chr18	24017349	24017910	11.2094	-	24017349	24017910	0	2	82243	0,318	549	5807	623	3461	4.26506	2.69982	-1.43269	1.95961e-05	0.000422314	ENSMUST00000153337	Zfp24	Exon
8721	peak_8721	chr8	31235751	31236101	11.2074	+	31235751	31236101	0	1	350	0	183	6301	248	3941	6.27473	4.62553	-1.50454	1.96645e-05	0.000422911	ENSMUST00000162162	Fut10	UTR5
12076	peak_12076	chr11	77456251	77456476	11.2074	+	77456251	77456476	0	1	225	0	195	1414	248	1048	4.07184	2.83052	-1.15107	1.96687e-05	0.000422911	ENSMUST00000037912	Ssh2	UTR3
609	peak_609	chr1	34816743	34817368	11.2065	-	34816743	34817368	0	1	625	0	1823	12468	1562	6632	3.87622	2.63247	-1.1557	1.97022e-05	0.000423149	ENSMUST00000047534	Fam168b	UTR3
7266	peak_7266	chr7	16434145	16435670	11.2064	+	16434145	16435670	0	1	1525	0	1958	51027	2040	39336	4.89139	3.7233	-1.09103	1.97271e-05	0.000423202	ENSMUST00000209289	Zc3h4	LastExon
13104	peak_13104	chr11	120011397	120012122	11.2021	-	120011397	120012122	0	1	725	0	107	5026	146	3715	5.60051	3.98957	-1.47528	1.98086e-05	0.000424466	ENSMUST00000142959	Aatk	UTR3
2865	peak_2865	chr3	38891539	38942913	11.1865	+	38891539	38942913	0	2	595105	0,51269	1323	18028	1335	10271	4.87203	3.49826	-1.26573	2.01928e-05	0.00042908	ENSMUST00000129182	Fat4	UTR5
4148	peak_4148	chr4	130022221	130022633	11.1865	+	130022221	130022633	0	1	412	0	245	3653	348	3016	3.87179	2.33918	-1.40465	2.02059e-05	0.00042908	ENSMUST00000136787	Adgrb2	UTR5
8379	peak_8379	chr7	105567719	105574272	11.1865	-	105567719	105574272	0	2	34591	0,5962	1488	8445	1421	5506	2.84547	1.59297	-1.16058	2.01349e-05	0.00042908	ENSMUST00000188726	Apbb1	LastExon
10614	peak_10614	chr9	96824593	96825243	11.1865	-	96824593	96825243	0	1	650	0	334	3576	394	2259	4.28357	2.72313	-1.42819	2.01585e-05	0.00042908	ENSMUST00000119141	Pxylp1	UTR3
12388	peak_12388	chr11	119024161	119029613	11.1865	+	119024161	119029613	0	3	791061715	0,2288,3737	1752	29851	2078	23585	4.37094	3.06222	-1.2093	2.00639e-05	0.00042908	ENSMUST00000026662	Cbx2	LastExon
12889	peak_12889	chr11	97511689	97512264	11.1865	-	97511689	97512264	0	1	575	0	408	5577	455	3388	4.56426	3.03173	-1.40334	2.01356e-05	0.00042908	ENSMUST00000107596	Srcin1	UTR3
18043	peak_18043	chr18	80447492	80449992	11.1865	-	80447492	80449992	0	2	73752	0,1748	581	9566	657	7168	4.41016	3.12112	-1.18904	2.01458e-05	0.00042908	ENSMUST00000036229	Ctdp1	Exon
18226	peak_18226	chr19	21684212	21684337	11.1865	+	21684212	21684337	0	1	125	0	28	382	78	250	5.04772	2.52891	-2.24942	2.01907e-05	0.00042908	ENSMUST00000235332	Abhd17b	UTR3
12087	peak_12087	chr11	77812516	77817938	11.1842	+	77812516	77817938	0	4	53,144,88,40	0,3339,5102,5382	389	3291	493	3122	3.18135	2.02782	-1.07466	2.02705e-05	0.000429764	ENSMUST00000168348	Myo18a	Exon
17434	peak_17434	chr18	23962484	23962959	11.1842	+	23962484	23962959	0	1	475	0	381	4694	409	2643	4.77557	3.65464	-1.04567	2.02837e-05	0.000429764	ENSMUST00000060762	Zfp397	UTR3
1003	peak_1003	chr1	156705609	156706034	11.1832	-	156705609	156706034	0	1	425	0	193	2514	290	2023	4.85042	3.43799	-1.29927	2.0323e-05	0.000430045	ENSMUST00000147931	Fam20b	UTR3
8139	peak_8139	chr7	37569254	37569854	11.1832	-	37569254	37569854	0	1	600	0	522	4813	587	4051	3.40753	2.24151	-1.08523	2.03426e-05	0.000430045	ENSMUST00000176680	Zfp536	LastExon
12892	peak_12892	chr11	97627517	97628867	11.1818	-	97627517	97628867	0	1	1350	0	637	22714	687	16665	5.09735	3.81821	-1.18752	2.03859e-05	0.000430479	ENSMUST00000052281	Epop	UTR3
4447	peak_4447	chr4	45399072	45399847	11.1815	-	45399072	45399847	0	1	775	0	648	11566	859	9807	5.17391	3.91561	-1.1653	2.04128e-05	0.000430563	ENSMUST00000116341	Slc25a51	UTR3
8135	peak_8135	chr7	37479218	37480193	11.1769	-	37479218	37480193	0	1	975	0	688	22925	791	18933	5.7145	4.55022	-1.08364	2.05007e-05	0.000431934	ENSMUST00000176205	Zfp536	UTR3
10560	peak_10560	chr9	75441471	75441646	11.176	-	75441471	75441646	0	1	175	0	89	1208	129	834	3.63815	1.85114	-1.62255	2.0537e-05	0.000432218	ENSMUST00000048937	Leo1	UTR5
12075	peak_12075	chr11	77453451	77455626	11.1717	+	77453451	77455626	0	1	2175	0	1722	59144	2062	47197	6.24712	5.10024	-1.06998	2.06556e-05	0.000433508	ENSMUST00000181283	Ssh2	LastExon
15838	peak_15838	chr15	98833943	98834568	11.1717	-	98833943	98834568	0	1	625	0	668	5505	724	4350	3.29064	2.0905	-1.11451	2.06673e-05	0.000433508	ENSMUST00000023741	Kmt2d	UTR3
16453	peak_16453	chr16	89885027	89898256	11.1717	-	89885027	89898256	0	2	98652	0,12577	532	6380	577	4725	4.23484	2.97546	-1.16609	2.06466e-05	0.000433508	ENSMUST00000002588	Tiam1	Exon
9803	peak_9803	chr9	46281210	46281835	11.169	+	46281210	46281835	0	1	625	0	366	3148	430	2109	4.05144	2.6331	-1.30556	2.07285e-05	0.000434308	ENSMUST00000156440	Zpr1	UTR3
13962	peak_13962	chr13	54525415	54525715	11.1632	+	54525415	54525715	0	1	300	0	242	1357	284	819	3.68868	2.20836	-1.3571	2.08356e-05	0.000436067	ENSMUST00000121401	Simc1	Exon
16846	peak_16846	chr17	56257517	56259117	11.1632	+	56257517	56259117	0	1	1600	0	1063	17669	1158	15206	4.48176	3.41358	-0.999413	2.08587e-05	0.000436067	ENSMUST00000060253	Fem1a	LastExon
16388	peak_16388	chr16	46394880	46395205	11.1547	-	46394880	46395205	0	1	325	0	229	1857	304	1086	4.23703	2.57401	-1.51483	2.10046e-05	0.000438631	ENSMUST00000121245	Nectin3	UTR3
8557	peak_8557	chr7	132987761	132988311	11.1465	-	132987761	132988311	0	1	550	0	1484	30380	1609	21058	5.56048	4.40738	-1.07587	2.11479e-05	0.000441135	ENSMUST00000033269	Ctbp2	UTR3
15768	peak_15768	chr15	84786305	84786505	11.146	-	84786305	84786505	0	1	200	0	317	1481	315	921	3.22667	1.91975	-1.20714	2.11788e-05	0.000441291	ENSMUST00000162044	Phf21b	UTR3
17719	peak_17719	chr18	65687001	65687701	11.1399	+	65687001	65687701	0	1	700	0	1370	41081	1494	27190	5.99078	4.69602	-1.19807	2.12923e-05	0.000443166	ENSMUST00000237756	Zfp532	UTR3
4534	peak_4534	chr4	76107402	76129020	11.1373	-	76107402	76129020	0	2	14536	0,21082	502	7044	540	3886	5.04679	3.65427	-1.28142	2.13639e-05	0.000443949	ENSMUST00000050757	Ptprd	Exon
4674	peak_4674	chr4	121149672	121150072	11.1373	-	121149672	121150072	0	1	400	0	207	1987	289	1321	4.51688	3.07472	-1.3304	2.1377e-05	0.000443949	ENSMUST00000056635	Rlf	LastExon
15434	peak_15434	chr15	101290504	101290554	11.1348	+	101290504	101290554	0	1	50	0	233	1307	306	835	2.97888	1.24086	-1.57867	2.14384e-05	0.000444734	ENSMUST00000048393	Atg101	LastExon
8364	peak_8364	chr7	102239122	102239372	11.1345	-	102239122	102239372	0	1	250	0	65	1076	173	1408	4.72108	2.99967	-1.56425	2.14658e-05	0.000444815	ENSMUST00000098230	Rhog	UTR3
6861	peak_6861	chr6	48025337	48025637	11.1342	-	48025337	48025637	0	1	300	0	223	2572	281	2019	3.63437	2.22114	-1.29921	2.14937e-05	0.000444903	ENSMUST00000095944	Zfp777	LastExon
3769	peak_3769	chr4	24901774	24902074	11.131	+	24901774	24902074	0	1	300	0	180	5336	282	3622	6.06553	4.63398	-1.31504	2.15734e-05	0.000445895	ENSMUST00000146721	Ndufaf4	UTR5
14951	peak_14951	chr14	52008724	52009049	11.131	-	52008724	52009049	0	1	325	0	873	7516	942	6073	3.1586	1.9772	-1.09722	2.15889e-05	0.000445895	ENSMUST00000166169	Zfp219	Exon
14651	peak_14651	chr14	50926592	50926817	11.13	+	50926592	50926817	0	1	225	0	441	2412	565	1415	3.65466	2.02688	-1.48477	2.16275e-05	0.000446203	ENSMUST00000160835	Pip4p1	UTR3
8589	peak_8589	chr7	141190829	141191229	11.1272	-	141190829	141191229	0	1	400	0	458	7567	653	6267	4.52158	3.03057	-1.36592	2.17175e-05	0.000447074	ENSMUST00000124971	Hras	UTR3
15707	peak_15707	chr15	79530306	79531735	11.1272	-	79530306	79531735	0	2	211,64	0,1365	3101	15451	3249	10815	3.16421	1.92563	-1.14772	2.17408e-05	0.000447074	ENSMUST00000229877	Ddx17	LastExon
18662	peak_18662	chr19	59906483	59907008	11.1272	-	59906483	59907008	0	1	525	0	224	2963	263	1783	4.95879	3.50901	-1.33301	2.1701e-05	0.000447074	ENSMUST00000171986	Rab11fip2	UTR3
10625	peak_10625	chr9	100458418	100459118	11.1265	-	100458418	100459118	0	1	700	0	28	1301	71	1038	6.59773	4.3101	-2.0544	2.18039e-05	0.000447301	ENSMUST00000125259	Il20rb	UTR3
14715	peak_14715	chr14	60756289	60762654	11.1265	+	60756289	60762654	0	3	295,76,1779	0,3293,4586	2079	44157	2244	31809	5.33046	4.09995	-1.14045	2.1823e-05	0.000447301	ENSMUST00000162939	Spata13	UTR5
16287	peak_16287	chr16	17841780	17842730	11.1265	-	17841780	17842730	0	1	950	0	1235	9884	1205	6383	3.74487	2.48724	-1.1637	2.18067e-05	0.000447301	ENSMUST00000117082	Dgcr2	UTR3
3877	peak_3877	chr4	55013519	55014702	11.1246	+	55013519	55014702	0	2	330,20	0,1163	2831	11270	2658	7213	3.03664	1.88506	-1.11696	2.19469e-05	0.000447892	ENSMUST00000079605	Zfp462	Exon
4874	peak_4874	chr4	143134195	143135545	11.1246	-	143134195	143135545	0	1	1350	0	1524	16668	1770	13150	4.66296	3.63038	-0.975273	2.18802e-05	0.000447892	ENSMUST00000105778	Prdm2	Exon
7370	peak_7370	chr7	27580610	27581060	11.1246	+	27580610	27581060	0	1	450	0	178	4597	200	3000	5.14205	3.63905	-1.38104	2.19143e-05	0.000447892	ENSMUST00000067386	2310022A10Rik	LastExon
10254	peak_10254	chr9	20470498	20471198	11.1246	-	20470498	20471198	0	1	700	0	471	13278	590	8770	6.06497	4.77142	-1.19557	2.19315e-05	0.000447892	ENSMUST00000168095	Zfp426	UTR3
1269	peak_1269	chr2	25706978	25707717	11.1155	+	25706978	25707717	0	1	739	0	263	5172	410	5464	4.95887	3.69744	-1.16664	2.21086e-05	0.000450704	ENSMUST00000151069	A230005M16Rik	UTR3
3604	peak_3604	chr3	108407002	108414464	11.1038	-	108407002	108414464	0	2	3952280	0,5182	5795	108278	4770	68181	4.65636	3.55798	-1.02528	2.23139e-05	0.000454399	ENSMUST00000090558	Celsr2	Exon
7400	peak_7400	chr7	28816481	28816856	11.0979	+	28816481	28816856	0	1	375	0	825	7990	1087	6118	4.50283	3.22083	-1.18513	2.24282e-05	0.000456234	ENSMUST00000174755	Hnrnpl	UTR5
572	peak_572	chr1	13167013	13174960	11.0948	-	13167013	13174960	0	2	93882	0,7065	802	29320	938	22580	5.9736	4.70543	-1.16777	2.26411e-05	0.000457225	ENSMUST00000143603	Ncoa2	UTR3
3344	peak_3344	chr3	51856428	51856803	11.0948	-	51856428	51856803	0	1	375	0	328	3983	516	4148	4.52439	3.26226	-1.16757	2.26205e-05	0.000457225	ENSMUST00000121440	Maml3	Exon
6813	peak_6813	chr6	32516809	32517659	11.0948	-	32516809	32517659	0	1	850	0	1109	16692	949	9643	4.9907	3.83318	-1.07666	2.25861e-05	0.000457225	ENSMUST00000115096	Plxna4	Exon
13668	peak_13668	chr12	83569050	83574993	11.0948	-	83569050	83574993	0	2	13362	0,5581	191	2170	249	1540	4.37017	2.83279	-1.40511	2.25856e-05	0.000457225	ENSMUST00000048319	Zfyve1	Exon
14619	peak_14619	chr14	34691827	34692702	11.0948	+	34691827	34692702	0	1	875	0	1355	26559	1541	17171	5.52162	4.41727	-1.03193	2.26334e-05	0.000457225	ENSMUST00000090027	Wapl	Exon
15347	peak_15347	chr15	84939739	84940664	11.0948	+	84939739	84940664	0	1	925	0	714	9811	820	6987	4.90927	3.64486	-1.1702	2.25439e-05	0.000457225	ENSMUST00000165443	Nup50	LastExon
18290	peak_18290	chr19	38716945	38719586	11.0948	+	38716945	38719586	0	2	294,31	0,2610	121	2722	128	1421	5.41934	3.76246	-1.50631	2.26466e-05	0.000457225	ENSMUST00000182267	Plce1	Exon
476	peak_476	chr1	174608493	174609193	11.0933	+	174608493	174609193	0	1	700	0	307	5597	406	4554	5.07092	3.72036	-1.24539	2.27533e-05	0.000457688	ENSMUST00000030039	Fmn2	Exon
8742	peak_8742	chr8	36102583	36104458	11.0933	+	36102583	36104458	0	1	1875	0	1531	50745	1540	33356	5.47895	4.15737	-1.21751	2.27667e-05	0.000457688	ENSMUST00000150295	Prag1	UTR5
9441	peak_9441	chr8	84816079	84816329	11.0933	-	84816079	84816329	0	1	250	0	84	1341	126	721	5.04661	3.01758	-1.82678	2.27316e-05	0.000457688	ENSMUST00000065539	Dand5	UTR3
14559	peak_14559	chr14	25665095	25665845	11.0933	+	25665095	25665845	0	1	750	0	2125	21765	1744	13086	4.13909	3.04126	-1.02462	2.27505e-05	0.000457688	ENSMUST00000162645	Zmiz1	UTR3
2684	peak_2684	chr2	167300943	167301343	11.0922	-	167300943	167301343	0	1	400	0	249	4462	280	2814	4.82385	3.32218	-1.3756	2.28255e-05	0.00045806	ENSMUST00000109221	B4galt5	UTR3
4631	peak_4631	chr4	117868972	117869397	11.0922	-	117868972	117869397	0	1	425	0	104	1354	174	1100	4.32295	2.52818	-1.62711	2.28338e-05	0.00045806	ENSMUST00000154439	Ccdc24	UTR3
338	peak_338	chr1	132504608	132504758	11.0892	+	132504608	132504758	0	1	150	0	66	446	97	228	3.96462	1.94481	-1.81853	2.29056e-05	0.000459012	ENSMUST00000027700	Rbbp5	UTR3
4369	peak_4369	chr4	22486344	22487844	11.0877	-	22486344	22487844	0	1	1500	0	3229	150511	3290	113423	6.00952	4.85564	-1.07331	2.296e-05	0.000459474	ENSMUST00000178174	Pou3f2	UTR3
4909	peak_4909	chr4	149179293	149179568	11.0877	-	149179293	149179568	0	1	275	0	582	2489	537	1282	3.30974	1.99007	-1.21752	2.30673e-05	0.000459474	ENSMUST00000139123	Kif1b	UTR3
5992	peak_5992	chr5	112219777	112219902	11.0877	-	112219777	112219902	0	1	125	0	450	1432	388	775	2.81836	1.55917	-1.16492	2.30827e-05	0.000459474	ENSMUST00000181535	Miat	UTR3
7356	peak_7356	chr7	25625035	25625551	11.0877	+	25625035	25625551	0	1	516	0	61	2728	95	1886	6.34009	4.52129	-1.64655	2.31967e-05	0.000459474	ENSMUST00000085953	Dmac2	UTR3
8060	peak_8060	chr7	27988824	27989524	11.0877	-	27988824	27989524	0	1	700	0	99	1800	119	784	5.39055	3.66104	-1.57126	2.31605e-05	0.000459474	ENSMUST00000180024	Zfp850	LastExon
8696	peak_8696	chr8	22938179	22940979	11.0877	+	22938179	22940979	0	1	2800	0	6364	136053	6986	105575	5.51327	4.43538	-1.00699	2.31495e-05	0.000459474	ENSMUST00000044331	Kat6a	LastExon
10794	peak_10794	chr10	13008899	13009174	11.0877	+	13008899	13009174	0	1	275	0	375	3737	443	2834	4.09333	2.78195	-1.20906	2.30066e-05	0.000459474	ENSMUST00000105139	Sf3b5	UTR3
14092	peak_14092	chr13	108047519	108048069	11.0877	+	108047519	108048069	0	1	550	0	356	4531	450	2934	4.91932	3.60922	-1.20944	2.3079e-05	0.000459474	ENSMUST00000224390	Smim15	LastExon
15138	peak_15138	chr14	104478583	104480083	11.0877	-	104478583	104480083	0	1	1500	0	718	19032	847	12712	5.9107	4.57306	-1.23332	2.3055e-05	0.000459474	ENSMUST00000022716	Rnf219	UTR3
17920	peak_17920	chr18	43531532	43531832	11.0877	-	43531532	43531832	0	1	300	0	138	5454	171	2859	6.4006	5.03462	-1.25746	2.31958e-05	0.000459474	ENSMUST00000238185	Jakmip2	UTR3
18035	peak_18035	chr18	80127511	80128336	11.0877	-	80127511	80128336	0	1	825	0	680	29870	831	21133	6.62819	5.29786	-1.22962	2.31594e-05	0.000459474	ENSMUST00000066743	Adnp2	UTR3
303	peak_303	chr1	118608701	118609351	11.084	+	118608701	118609351	0	1	650	0	1082	34852	1061	20466	6.1459	4.88127	-1.16929	2.33061e-05	0.000460675	ENSMUST00000204325	Clasp1	UTR3
9194	peak_9194	chr8	8619758	8620833	11.084	-	8619758	8620833	0	1	1075	0	5239	156683	4877	112101	5.38133	4.28577	-1.02241	2.32937e-05	0.000460675	ENSMUST00000001319	Efnb2	UTR3
10066	peak_10066	chr9	108528785	108533653	11.0819	+	108528785	108533653	0	2	133,67	0,4801	1123	5024	1153	3725	2.7959	1.64609	-1.06939	2.33636e-05	0.000461327	ENSMUST00000194743	Qrich1	UTR5
4386	peak_4386	chr4	34804637	34805612	11.0797	-	34804637	34805612	0	1	975	0	1224	31581	1438	19807	5.80634	4.74708	-0.990476	2.34242e-05	0.00046204	ENSMUST00000047950	Zfp292	UTR3
1253	peak_1253	chr2	25243912	25244137	11.0753	+	25243912	25244137	0	1	225	0	88	1228	123	854	4.15999	2.39179	-1.60266	2.3564e-05	0.000463443	ENSMUST00000060818	Rnf208	LastExon
6832	peak_6832	chr6	38697514	38698564	11.0753	-	38697514	38698564	0	1	1050	0	1878	35965	2055	26749	5.15417	3.96907	-1.10071	2.35759e-05	0.000463443	ENSMUST00000160360	Hipk2	UTR3
9069	peak_9069	chr8	113641997	113642497	11.0753	+	113641997	113642497	0	1	500	0	139	1660	167	1018	4.29088	2.61377	-1.52532	2.35937e-05	0.000463443	ENSMUST00000035777	Mon1b	LastExon
16465	peak_16465	chr16	92392902	92393427	11.0753	-	92392902	92393427	0	1	525	0	144	3264	187	2104	5.33277	3.69083	-1.49477	2.35583e-05	0.000463443	ENSMUST00000232197	Rcan1	UTR3
2749	peak_2749	chr2	180659088	180662413	11.0724	-	180659088	180662413	0	1	3325	0	3088	97627	3181	70054	5.73047	4.53791	-1.10607	2.36669e-05	0.000464397	ENSMUST00000087517	Dido1	UTR3
15737	peak_15737	chr15	82852986	82854636	11.0685	-	82852986	82854636	0	1	1650	0	6430	64875	7306	53647	4.51532	3.52586	-0.929315	2.3755e-05	0.000465643	ENSMUST00000109510	Tcf20	Exon
459	peak_459	chr1	171463590	171463965	11.0678	+	171463590	171463965	0	1	375	0	77	1147	59	3179	5.13205	6.61455	1.35819	2.38378e-05	0.000465863	ENSMUST00000043839	F11r	UTR3
10798	peak_10798	chr10	13130355	13130530	11.0678	+	13130355	13130530	0	1	175	0	409	2310	418	962	3.6043	2.16338	-1.32213	2.38404e-05	0.000465863	ENSMUST00000121766	Plagl1	UTR3
16864	peak_16864	chr17	66151118	66151518	11.0678	+	66151118	66151518	0	1	400	0	135	2551	173	1439	5.46705	3.80329	-1.513	2.38183e-05	0.000465863	ENSMUST00000224497	Ddx11	UTR3
13281	peak_13281	chr12	76385310	76385860	11.0595	+	76385310	76385860	0	1	550	0	280	2742	458	2454	4.50872	3.14473	-1.25515	2.40025e-05	0.000468545	ENSMUST00000042779	Zbtb1	LastExon
13941	peak_13941	chr13	49661277	49661477	11.0567	+	49661277	49661477	0	1	200	0	103	1073	130	519	4.53531	2.98714	-1.41472	2.40742e-05	0.000469459	ENSMUST00000021824	Nol8	Exon
18487	peak_18487	chr19	5892038	5892288	11.0553	-	5892038	5892288	0	1	250	0	32	914	69	547	5.24695	2.74543	-2.22992	2.41222e-05	0.00046991	ENSMUST00000236767	Tigd3	LastExon
19027	peak_19027	chrX	60892294	60893269	11.0527	-	60892294	60893269	0	1	975	0	1464	17648	1661	12600	3.00496	1.67571	-1.22519	2.41907e-05	0.000470758	ENSMUST00000135107	Sox3	LastExon
14965	peak_14965	chr14	52314421	52314771	11.0467	-	52314421	52314771	0	1	350	0	451	8219	732	7520	4.79204	3.28432	-1.3799	2.43172e-05	0.000472731	ENSMUST00000058326	Sall2	LastExon
5998	peak_5998	chr5	112421750	112422000	11.0432	-	112421750	112422000	0	1	250	0	221	1875	245	886	3.97771	2.14774	-1.65562	2.4402e-05	0.000473892	ENSMUST00000197425	Sez6l	UTR3
5625	peak_5625	chr5	143245338	143246188	11.042	+	143245338	143246188	0	1	850	0	549	10976	609	6982	5.40414	4.04025	-1.25694	2.44848e-05	0.000474259	ENSMUST00000075916	Zfp12	UTR3
7479	peak_7479	chr7	44816362	44832139	11.042	+	44816362	44832139	0	4	121,132,2323,24	0,2074,12124,15753	2117	64869	2776	58148	5.59247	4.35179	-1.14811	2.44684e-05	0.000474259	ENSMUST00000207103	Nup62	UTR5
12867	peak_12867	chr11	94645145	94645320	11.042	-	94645145	94645320	0	1	175	0	164	975	236	609	3.68253	1.83845	-1.66698	2.4501e-05	0.000474259	ENSMUST00000039949	Eme1	UTR3
16630	peak_16630	chr17	26187964	26188064	11.042	+	26187964	26188064	0	1	100	0	113	708	128	400	3.10819	1.30592	-1.6318	2.45215e-05	0.000474259	ENSMUST00000163421	Axin1	Exon
11663	peak_11663	chr10	127055260	127055410	11.033	-	127055260	127055410	0	1	150	0	67	520	121	368	4.11202	2.20889	-1.71782	2.47002e-05	0.000477226	ENSMUST00000040307	March9	UTR3
1335	peak_1335	chr2	31292486	31292911	11.0312	+	31292486	31292911	0	1	425	0	307	2589	321	1902	4.11004	2.99296	-1.04169	2.48078e-05	0.000477835	ENSMUST00000000199	Ncs1	UTR3
12736	peak_12736	chr11	72452662	72452962	11.0312	-	72452662	72452962	0	1	300	0	40	2000	93	2116	6.29946	4.48211	-1.64408	2.47849e-05	0.000477835	ENSMUST00000144940	Spns2	UTR3
12865	peak_12865	chr11	94466188	94473911	11.0312	-	94466188	94473911	0	2	39536	0,7187	349	6156	699	7654	3.75312	2.3837	-1.25993	2.47631e-05	0.000477835	ENSMUST00000107785	Cacna1g	Exon
5786	peak_5786	chr5	33248248	33248448	11.0303	-	33248248	33248448	0	1	200	0	1177	5880	1041	3671	3.35455	2.24968	-1.0282	2.48735e-05	0.000478123	ENSMUST00000201514	Ctbp1	UTR3
6022	peak_6022	chr5	113943118	113946703	11.0303	-	113943118	113946703	0	2	347428	0,3157	505	8507	682	8281	4.44159	3.24723	-1.10859	2.48514e-05	0.000478123	ENSMUST00000077689	Ssh1	Exon
15435	peak_15435	chr15	101290579	101290854	11.0301	+	101290579	101290854	0	1	275	0	121	1575	185	963	4.38267	2.35255	-1.82524	2.49028e-05	0.0004782	ENSMUST00000048393	Atg101	LastExon
2869	peak_2869	chr3	38982599	38983674	11.029	+	38982599	38983674	0	1	1075	0	1419	17596	1438	10140	4.70622	3.32961	-1.26814	2.49811e-05	0.000478549	ENSMUST00000061260	Fat4	Exon
5410	peak_5410	chr5	118008057	118008757	11.029	+	118008057	118008757	0	1	700	0	1033	13276	960	7276	4.64318	3.27241	-1.26042	2.50104e-05	0.000478549	ENSMUST00000201611	Fbxo21	LastExon
6522	peak_6522	chr6	85629536	85629711	11.029	+	85629536	85629711	0	1	175	0	65	758	128	487	4.77816	2.85651	-1.73331	2.50225e-05	0.000478549	ENSMUST00000213058	Alms1	Exon
9855	peak_9855	chr9	57111020	57113503	11.029	+	57111020	57113503	0	2	132,43	0,2440	188	1227	218	561	3.97834	2.24435	-1.57241	2.49893e-05	0.000478549	ENSMUST00000049169	Sin3a	Exon
3540	peak_3540	chr3	97209600	97210700	11.0257	-	97209600	97210700	0	1	1100	0	1906	26204	1955	21981	4.23377	3.2362	-0.937865	2.51067e-05	0.000479673	ENSMUST00000166341	Bcl9	Exon
10662	peak_10662	chr9	106884084	106887000	11.0252	-	106884084	106887000	0	1	2916	0	6771	230869	6982	201818	5.13643	4.16465	-0.913383	2.51658e-05	0.000479829	ENSMUST00000185707	Rbm15b	UTR3
12020	peak_12020	chr11	71020035	71024670	11.0252	+	71020035	71024670	0	2	154121	0,4514	571	4187	756	2796	4.10973	2.66499	-1.32537	2.5141e-05	0.000479829	ENSMUST00000136137	Mis12	UTR5
13324	peak_13324	chr12	84417643	84418468	11.0243	+	84417643	84418468	0	1	825	0	480	6086	661	4551	4.90482	3.54243	-1.25247	2.5222e-05	0.000480136	ENSMUST00000183146	Rnf113a2	LastExon
17043	peak_17043	chr17	25792059	25792284	11.0243	-	25792059	25792284	0	1	225	0	114	1719	236	2140	3.84225	2.37776	-1.34371	2.52328e-05	0.000480136	ENSMUST00000237703	Fam173a	UTR3
2401	peak_2401	chr2	121209268	121216028	11.0234	-	121209268	121216028	0	4	84153176362	0,2001,2531,6398	1976	29831	1921	18078	4.84815	3.53667	-1.20912	2.52738e-05	0.000480431	ENSMUST00000140582	Trp53bp1	UTR3
13973	peak_13973	chr13	55246717	55260383	11.0219	+	55246717	55260383	0	2	1360,40	0,13626	4700	62802	5332	46067	4.97996	3.90229	-1.00612	2.53258e-05	0.000480934	ENSMUST00000099490	Nsd1	Exon
17413	peak_17413	chr18	9212855	9215530	11.0204	+	9212855	9215530	0	1	2675	0	2788	70759	3032	58889	4.86307	3.72119	-1.06083	2.53767e-05	0.000481417	ENSMUST00000041080	Fzd8	UTR5
9473	peak_9473	chr8	89032422	89032722	11.0167	-	89032422	89032722	0	1	300	0	543	3838	531	2237	3.20172	1.70509	-1.38275	2.5468e-05	0.000482664	ENSMUST00000034090	Sall1	Exon
3051	peak_3051	chr3	94878758	94880458	11.0094	+	94878758	94880458	0	1	1700	0	2143	37723	2084	27673	5.00951	3.95889	-0.989474	2.56479e-05	0.000485098	ENSMUST00000107269	Pogz	LastExon
16721	peak_16721	chr17	34645363	34646324	11.0094	+	34645363	34646324	0	1	961	0	176	3088	239	2535	4.98173	3.60064	-1.26879	2.56259e-05	0.000485098	ENSMUST00000036720	Fkbpl	LastExon
472	peak_472	chr1	172497276	172497626	11.0089	+	172497276	172497626	0	1	350	0	775	9234	723	5302	3.58906	2.16062	-1.31053	2.57208e-05	0.000485288	ENSMUST00000127482	Igsf9	UTR3
2989	peak_2989	chr3	88816276	88816676	11.0089	+	88816276	88816676	0	1	400	0	390	2909	357	1619	3.73602	2.38087	-1.24681	2.57237e-05	0.000485288	ENSMUST00000135913	5830417I10Rik	UTR5
7803	peak_7803	chr7	127236281	127237006	11.0089	+	127236281	127237006	0	1	725	0	698	7953	888	7616	3.69799	2.56391	-1.05458	2.57609e-05	0.000485288	ENSMUST00000056232	Zfp553	LastExon
16338	peak_16338	chr16	32843304	32843454	11.0089	-	32843304	32843454	0	1	150	0	152	944	193	702	3.14963	1.62714	-1.39122	2.57416e-05	0.000485288	ENSMUST00000119810	Rubcn	Exon
9310	peak_9310	chr8	48227781	48228981	11.0073	-	48227781	48228981	0	1	1200	0	1085	37509	1088	22643	6.26075	4.97613	-1.18548	2.58152e-05	0.000485826	ENSMUST00000190840	Tenm3	UTR3
12378	peak_12378	chr11	117761971	117762646	10.9975	+	117761971	117762646	0	1	675	0	554	13407	649	8632	5.82547	4.63827	-1.10202	2.60164e-05	0.000489123	ENSMUST00000106344	Tnrc6c	UTR3
10246	peak_10246	chr9	16376925	16378225	10.991	-	16376925	16378225	0	1	1300	0	3555	52358	3295	28797	5.11733	3.93937	-1.09314	2.62123e-05	0.000491336	ENSMUST00000082170	Fat3	Exon
11491	peak_11491	chr10	80392538	80392913	10.991	-	80392538	80392913	0	1	375	0	1163	11635	1140	7700	3.67422	2.39849	-1.17606	2.62048e-05	0.000491336	ENSMUST00000105349	Mbd3	UTR3
14499	peak_14499	chr13	111466857	111487659	10.991	-	111466857	111487659	0	2	113237	0,20565	389	5515	448	2978	4.982	3.6953	-1.18686	2.61983e-05	0.000491336	ENSMUST00000136471	Gpbp1	UTR5
334	peak_334	chr1	132449379	132449929	10.9905	+	132449379	132449929	0	1	550	0	172	3135	285	2718	5.39549	3.95052	-1.32612	2.62593e-05	0.000491494	ENSMUST00000187092	Dstyk	Exon
15442	peak_15442	chr15	102280252	102281302	10.9905	+	102280252	102281302	0	1	1050	0	231	2798	361	3066	4.1157	2.88391	-1.14009	2.62728e-05	0.000491494	ENSMUST00000051341	Mfsd5	LastExon
4124	peak_4124	chr4	128751667	128751792	10.9895	+	128751667	128751792	0	1	125	0	463	2236	444	1562	2.34813	1.15509	-1.1063	2.63174e-05	0.000491841	ENSMUST00000106079	Phc2	UTR3
824	peak_824	chr1	118834181	118835081	10.9889	-	118834181	118835081	0	1	900	0	247	8254	272	5363	6.25537	5.0037	-1.15459	2.63812e-05	0.000492057	ENSMUST00000062483	Gli2	UTR3
15288	peak_15288	chr15	76900645	76900845	10.9889	+	76900645	76900845	0	1	200	0	47	587	89	459	3.70608	1.73635	-1.77145	2.63737e-05	0.000492057	ENSMUST00000230214	Gm49527	UTR3
9483	peak_9483	chr8	94575367	94575592	10.9885	-	94575367	94575592	0	1	225	0	230	1839	265	1075	4.09748	2.56843	-1.39691	2.64144e-05	0.000492189	ENSMUST00000034226	Fam192a	UTR3
17096	peak_17096	chr17	32196948	32198108	10.9865	-	32196948	32198108	0	2	872,78	0,1082	1549	29905	1540	22152	5.06101	3.97514	-1.01675	2.64768e-05	0.000492865	ENSMUST00000121285	Brd4	UTR3
18420	peak_18420	chr19	59465055	59465230	10.9858	+	59465055	59465230	0	1	175	0	350	1947	372	887	3.63027	2.22176	-1.2925	2.65165e-05	0.000493118	ENSMUST00000174353	Emx2	UTR3
7769	peak_7769	chr7	122999401	123000605	10.981	+	122999401	123000605	0	2	878,22	0,1182	1633	12610	2223	10499	4.19607	3.1433	-0.984748	2.66305e-05	0.00049475	ENSMUST00000071590	Rbbp6	Exon
17892	peak_17892	chr18	37755678	37756503	10.9803	-	37755678	37756503	0	1	825	0	968	8943	1129	7002	4.17537	2.98168	-1.1074	2.66705e-05	0.000495005	ENSMUST00000192805	Gm26672	UTR3
6101	peak_6101	chr5	124005840	124006565	10.9785	-	124005840	124006565	0	1	725	0	745	8898	750	5608	3.75383	2.36968	-1.27294	2.67587e-05	0.000495604	ENSMUST00000199306	Vps37b	UTR3
10836	peak_10836	chr10	29196978	29198957	10.9785	+	29196978	29198957	0	2	462,13	0,1966	1552	12394	1417	8556	3.30562	2.18612	-1.04224	2.67625e-05	0.000495604	ENSMUST00000092629	Soga3	Exon
12389	peak_12389	chr11	119078122	119081865	10.9785	+	119078122	119081865	0	2	71895	0,2848	271	9363	387	10309	5.15065	4.03165	-1.037	2.67816e-05	0.000495604	ENSMUST00000145058	Cbx4	UTR3
15841	peak_15841	chr15	98843177	98844254	10.9773	-	98843177	98844254	0	3	49141660	0,174,417	1946	35004	2090	30459	4.48542	3.44839	-0.970182	2.68306e-05	0.000496025	ENSMUST00000023741	Kmt2d	Exon
1519	peak_1519	chr2	91620109	91620534	10.967	+	91620109	91620534	0	1	425	0	751	9348	731	5176	4.87784	3.57631	-1.20265	2.70501e-05	0.000499592	ENSMUST00000111337	Ckap5	LastExon
18726	peak_18726	chrX	48367487	48368471	10.9659	+	48367487	48368471	0	2	22703	0,281	262	3826	355	3604	4.26711	3.00427	-1.16879	2.70956e-05	0.000499944	ENSMUST00000114972	Bcorl1	Exon
7734	peak_7734	chr7	111033788	111033938	10.9626	+	111033788	111033938	0	1	150	0	347	1740	416	1084	3.46813	2.3478	-1.04506	2.71843e-05	0.00050109	ENSMUST00000143818	Ctr9	UTR5
14342	peak_14342	chr13	67539440	67539640	10.9597	-	67539440	67539640	0	1	200	0	41	785	85	521	5.4426	3.57673	-1.68378	2.72671e-05	0.000502125	ENSMUST00000181892	Zfp748	UTR3
6582	peak_6582	chr6	107567822	107568897	10.9582	+	107567822	107568897	0	1	1075	0	1202	32982	1497	20234	6.04059	4.54348	-1.36828	2.73213e-05	0.000502631	ENSMUST00000049285	Lrrn1	LastExon
3152	peak_3152	chr3	106732002	106732177	10.9558	+	106732002	106732177	0	1	175	0	22	346	60	189	5.14676	2.6499	-2.22302	2.7417e-05	0.000503483	ENSMUST00000106737	Lrif1	UTR5
14961	peak_14961	chr14	52311521	52312421	10.9558	-	52311521	52312421	0	1	900	0	598	20799	910	19345	6.30615	5.06812	-1.14763	2.7421e-05	0.000503483	ENSMUST00000058326	Sall2	UTR3
6970	peak_6970	chr6	87588402	87588802	10.9519	-	87588402	87588802	0	1	400	0	53	1132	56	458	5.28274	3.23635	-1.83518	2.75483e-05	0.000504838	ENSMUST00000050887	Prokr1	Exon
10698	peak_10698	chr9	108575142	108576292	10.9519	-	108575142	108576292	0	1	1150	0	1404	14898	2031	15761	3.71024	2.54917	-1.07884	2.75369e-05	0.000504838	ENSMUST00000068700	Wdr6	Exon
12213	peak_12213	chr11	95763827	95764552	10.9479	+	95763827	95764552	0	1	725	0	1074	33003	1162	22601	5.91817	4.64536	-1.17456	2.76518e-05	0.000506242	ENSMUST00000091565	Zfp652	LastExon
8662	peak_8662	chr8	13879424	13880424	10.9431	+	13879424	13880424	0	1	1000	0	1175	44264	1436	31738	6.47369	5.26035	-1.12304	2.7771e-05	0.000507932	ENSMUST00000128557	Champ1	LastExon
2800	peak_2800	chr3	9280769	9281269	10.9416	+	9280769	9281269	0	1	500	0	269	13303	422	11211	6.83262	5.67532	-1.07436	2.78328e-05	0.000508463	ENSMUST00000155203	Zbtb10	LastExon
6595	peak_6595	chr6	113150954	113151854	10.9416	+	113150954	113151854	0	1	900	0	1448	47685	1486	31244	6.14988	4.93194	-1.12923	2.7854e-05	0.000508463	ENSMUST00000150107	Setd5	UTR5
11924	peak_11924	chr11	60442002	60442402	10.9404	+	60442002	60442402	0	1	400	0	179	4034	200	2187	5.56406	3.94739	-1.47042	2.79302e-05	0.000508873	ENSMUST00000070681	Gid4	LastExon
16917	peak_16917	chr17	87133791	87135366	10.9404	+	87133791	87135366	0	1	1575	0	424	15385	566	12631	6.23035	4.93229	-1.19624	2.79304e-05	0.000508873	ENSMUST00000041369	Socs5	LastExon
10518	peak_10518	chr9	65702743	65704468	10.9392	-	65702743	65704468	0	1	1725	0	2824	31142	2984	26307	4.32655	3.34935	-0.917464	2.79805e-05	0.000509294	ENSMUST00000159109	Zfp609	Exon
3451	peak_3451	chr3	87858949	87859199	10.9392	-	87858949	87859199	0	1	250	0	255	1372	279	802	3.59207	2.18592	-1.2889	2.80078e-05	0.000509299	ENSMUST00000005015	Prcc	UTR3
18163	peak_18163	chr19	8965410	8966207	10.9366	+	8965410	8966207	0	1	797	0	747	10548	757	6571	4.6847	3.35388	-1.22551	2.80863e-05	0.000510234	ENSMUST00000096239	Tut1	LastExon
14076	peak_14076	chr13	97245170	97251422	10.9347	+	97245170	97251422	0	2	1614886	0,5366	9423	152511	8667	81947	5.09428	3.75518	-1.23182	2.81495e-05	0.00051089	ENSMUST00000041623	Enc1	Exon
6173	peak_6173	chr5	135250337	135250637	10.9339	-	135250337	135250637	0	1	300	0	241	3158	294	2357	3.47082	2.0611	-1.29263	2.81916e-05	0.000511162	ENSMUST00000062572	Fzd9	LastExon
12752	peak_12752	chr11	75452179	75453554	10.9306	-	75452179	75453554	0	1	1375	0	235	8080	369	7823	5.63813	4.25165	-1.27626	2.82842e-05	0.000512348	ENSMUST00000117392	Wdr81	Exon
881	peak_881	chr1	132357089	132357589	10.9278	-	132357089	132357589	0	1	500	0	295	2503	372	2129	3.41314	2.12746	-1.18587	2.8366e-05	0.000513338	ENSMUST00000132435	Tmcc2	UTR3
6811	peak_6811	chr6	32148900	32149475	10.9208	-	32148900	32149475	0	1	575	0	624	11138	511	5032	5.32077	3.95958	-1.25163	2.85322e-05	0.000515849	ENSMUST00000115096	Plxna4	UTR3
17752	peak_17752	chr18	76972429	76972804	10.9206	+	76972429	76972804	0	1	375	0	103	880	148	553	4.23673	2.4943	-1.57708	2.85623e-05	0.0005159	ENSMUST00000148955	Hdhd2	UTR3
6117	peak_6117	chr5	125017152	125018277	10.9177	-	125017152	125018277	0	1	1125	0	1064	33846	1076	23214	5.18064	3.90672	-1.17525	2.86486e-05	0.000516963	ENSMUST00000086083	Ncor2	UTR3
3915	peak_3915	chr4	63133456	63134031	10.9165	+	63133456	63134031	0	1	575	0	164	4215	312	4061	5.85823	4.33342	-1.39199	2.86983e-05	0.000517365	ENSMUST00000064814	Zfp618	LastExon
13659	peak_13659	chr12	81722499	81724439	10.9149	-	81722499	81724439	0	2	24376	0,1564	183	4199	182	2531	4.97407	3.54416	-1.30973	2.87859e-05	0.000517953	ENSMUST00000222322	Map3k9	Exon
14981	peak_14981	chr14	54856485	54857510	10.9149	-	54856485	54857510	0	1	1025	0	314	6684	397	4890	5.62323	4.31296	-1.20809	2.87854e-05	0.000517953	ENSMUST00000142283	Homez	UTR3
7580	peak_7580	chr7	75865914	75872795	10.9051	+	75865914	75872795	0	2	1227,98	0,6783	758	16420	804	10964	5.04768	3.68923	-1.25045	2.90095e-05	0.00052148	ENSMUST00000205612	Klhl25	UTR5
7648	peak_7648	chr7	96894841	96895666	10.8971	+	96894841	96895666	0	1	825	0	1613	19649	1473	9399	4.61658	3.07946	-1.40042	2.92235e-05	0.000524392	ENSMUST00000107165	Tenm4	Exon
12063	peak_12063	chr11	75703503	75704453	10.8971	+	75703503	75704453	0	1	950	0	1255	18535	1459	11987	5.13482	3.91788	-1.12823	2.92271e-05	0.000524392	ENSMUST00000108425	Crk	UTR3
14713	peak_14713	chr14	60691887	60703016	10.894	+	60691887	60703016	0	2	661,64	0,11065	1247	13913	1320	11117	3.87763	2.76388	-1.03507	2.93166e-05	0.000525496	ENSMUST00000160095	Spata13	Exon
15930	peak_15930	chr16	10421390	10421579	10.8931	+	10421390	10421579	0	2	47,3	0,186	85	499	125	321	3.17822	1.33651	-1.66204	2.93629e-05	0.000525827	ENSMUST00000051118	Tvp23a	UTR3
7768	peak_7768	chr7	122998976	122999351	10.8904	+	122998976	122999351	0	1	375	0	864	7892	1215	5698	4.4424	3.02081	-1.30083	2.9475e-05	0.000526834	ENSMUST00000071590	Rbbp6	Exon
10799	peak_10799	chr10	13130630	13130755	10.8904	+	13130630	13130755	0	1	125	0	345	2080	340	781	3.7133	2.1733	-1.40371	2.94616e-05	0.000526834	ENSMUST00000121766	Plagl1	UTR3
11335	peak_11335	chr10	42196387	42196937	10.8861	-	42196387	42196937	0	1	550	0	229	6238	334	5763	5.4745	4.12359	-1.24162	2.95903e-05	0.000528394	ENSMUST00000175881	Foxo3	UTR3
2390	peak_2390	chr2	120745552	120748872	10.884	-	120745552	120748872	0	2	737438	0,2882	974	19975	978	12517	5.56306	4.36647	-1.11031	2.96604e-05	0.000529145	ENSMUST00000148285	Cdan1	UTR3
6238	peak_6238	chr5	140758532	140758857	10.881	-	140758532	140758857	0	1	325	0	1023	7296	1152	5976	3.87886	2.81395	-0.993738	2.97507e-05	0.000530255	ENSMUST00000000153	Gna12	UTR3
14955	peak_14955	chr14	52198175	52198925	10.8796	-	52198175	52198925	0	1	750	0	832	13635	887	9163	5.1942	3.99234	-1.11266	2.98091e-05	0.000530793	ENSMUST00000147827	Chd8	UTR3
4584	peak_4584	chr4	107233613	107233938	10.8765	-	107233613	107233938	0	1	325	0	389	2263	593	1829	3.77142	2.40805	-1.25323	2.98998e-05	0.000531907	ENSMUST00000142657	Lrrc42	UTR3
7087	peak_7087	chr6	119779618	119797292	10.8764	-	119779618	119797292	0	3	14,75,386	0,3770,17288	1009	5804	1109	4369	3.6427	2.5313	-1.03408	2.99585e-05	0.000531947	ENSMUST00000079582	Erc1	Exon
11532	peak_11532	chr10	81264712	81264812	10.8764	-	81264712	81264812	0	1	100	0	158	1078	252	1086	3.42286	2.03938	-1.26938	2.99317e-05	0.000531947	ENSMUST00000046114	Mrpl54	UTR3
4408	peak_4408	chr4	41115026	41115426	10.8706	-	41115026	41115426	0	1	400	0	255	4208	285	2516	4.81952	3.27108	-1.40957	3.01201e-05	0.000534104	ENSMUST00000030138	Nol6	UTR3
18002	peak_18002	chr18	73677670	73677920	10.8706	-	73677670	73677920	0	1	250	0	1156	6717	1130	3900	3.74019	2.73624	-0.940409	3.01366e-05	0.000534104	ENSMUST00000114939	Smad4	Exon
15845	peak_15845	chr15	98849418	98850893	10.8695	-	98849418	98850893	0	1	1475	0	2234	51195	2486	46817	4.79374	3.7785	-0.951257	3.01877e-05	0.000534506	ENSMUST00000023741	Kmt2d	Exon
566	peak_566	chr1	9746333	9747883	10.8661	-	9746333	9747883	0	1	1550	0	1101	21490	1372	16994	5.49541	4.35023	-1.06199	3.02986e-05	0.000535785	ENSMUST00000057438	Vcpip1	Exon
2011	peak_2011	chr2	20871750	20880342	10.8661	-	20871750	20880342	0	2	18382	0,8210	891	5853	917	3685	3.80082	2.53298	-1.16942	3.03605e-05	0.000535785	ENSMUST00000174584	Arhgap21	Exon
11008	peak_11008	chr10	79688007	79688394	10.8661	+	79688007	79688394	0	1	387	0	232	4061	296	2985	4.71684	3.21087	-1.37379	3.03735e-05	0.000535785	ENSMUST00000218964	Cdc34	UTR3
18419	peak_18419	chr19	59463930	59464480	10.8661	+	59463930	59464480	0	1	550	0	3229	98354	3309	50192	6.13382	4.62523	-1.37615	3.03377e-05	0.000535785	ENSMUST00000174573	Emx2	UTR5
6156	peak_6156	chr5	131534317	131537954	10.8629	-	131534317	131537954	0	2	80295	0,3342	1219	29010	961	12728	5.45921	3.99576	-1.33747	3.04683e-05	0.000536953	ENSMUST00000198165	Auts2	UTR3
15333	peak_15333	chr15	81823471	81823996	10.8606	+	81823471	81823996	0	1	525	0	399	5137	433	4289	4.43553	3.40829	-0.960941	3.05465e-05	0.00053783	ENSMUST00000168632	Tef	UTR5
5553	peak_5553	chr5	136274995	136393068	10.8563	+	136274995	136393068	0	2	394,81	0,117992	389	13488	383	9124	4.8632	3.60834	-1.15808	3.06658e-05	0.000539426	ENSMUST00000163906	Cux1	UTR3
1524	peak_1524	chr2	91917602	91918552	10.8544	+	91917602	91918552	0	1	950	0	545	9903	620	6965	4.73222	3.35471	-1.26586	3.07909e-05	0.000540115	ENSMUST00000045699	Ambra1	LastExon
15029	peak_15029	chr14	60963983	60964633	10.8544	-	60963983	60964633	0	1	650	0	1128	13466	1475	7631	4.83144	3.30576	-1.39134	3.07655e-05	0.000540115	ENSMUST00000111234	Tnfrsf19	UTR3
17498	peak_17498	chr18	36763285	36763708	10.8544	+	36763285	36763708	0	1	423	0	465	4368	555	2869	4.44852	3.05813	-1.27099	3.07666e-05	0.000540115	ENSMUST00000049323	Wdr55	LastExon
6810	peak_6810	chr6	32148325	32148525	10.8536	-	32148325	32148525	0	1	200	0	370	2526	321	1066	3.99923	2.57052	-1.30842	3.08367e-05	0.000540415	ENSMUST00000115096	Plxna4	UTR3
14353	peak_14353	chr13	67618050	67618675	10.85	-	67618050	67618675	0	1	625	0	40	1736	81	1005	6.45115	4.58163	-1.68383	3.09439e-05	0.000541792	ENSMUST00000225511	Zfp729a	UTR3
13624	peak_13624	chr12	75716172	75716447	10.8431	-	75716172	75716447	0	1	275	0	49	1135	74	640	5.72119	3.77628	-1.74823	3.11207e-05	0.000544382	ENSMUST00000021450	Sgpp1	LastExon
4634	peak_4634	chr4	117905550	117912164	10.839	-	117905550	117912164	0	2	33392	0,6222	183	2052	215	1503	3.74282	2.32466	-1.29856	3.12384e-05	0.000545933	ENSMUST00000036156	Ipo13	Exon
2868	peak_2868	chr3	38981249	38982524	10.8389	+	38981249	38982524	0	1	1275	0	2468	27660	2605	16850	4.69324	3.42822	-1.16667	3.12696e-05	0.000545973	ENSMUST00000061260	Fat4	Exon
12918	peak_12918	chr11	100462613	100464263	10.8387	-	100462613	100464263	0	1	1650	0	1587	39894	1970	29851	5.89727	4.7481	-1.06193	3.13017e-05	0.000546028	ENSMUST00000056665	Klhl11	UTR3
6516	peak_6516	chr6	85619728	85620078	10.8368	+	85619728	85620078	0	1	350	0	224	2172	296	1371	4.52488	3.03469	-1.35926	3.13729e-05	0.000546765	ENSMUST00000213058	Alms1	Exon
603	peak_603	chr1	33746233	33746408	10.8361	-	33746233	33746408	0	1	175	0	47	1000	89	563	5.57002	3.26589	-2.05949	3.14217e-05	0.000547015	ENSMUST00000044691	Bag2	UTR3
13439	peak_13439	chr12	111293747	111293988	10.8361	+	111293747	111293988	0	1	241	0	148	3225	215	2708	5.40317	4.01339	-1.27632	3.14453e-05	0.000547015	ENSMUST00000222483	Cdc42bpb	UTR3
18034	peak_18034	chr18	78859741	79109238	10.8334	-	78859741	79109238	0	4	190,54,630,51	0,64247,226809,249446	4729	89995	4074	50338	5.09057	3.82457	-1.16747	3.15346e-05	0.000548063	ENSMUST00000025430	Setbp1	Exon
427	peak_427	chr1	161083079	161083379	10.8325	+	161083079	161083379	0	1	300	0	112	1669	139	839	5.14275	3.50586	-1.48516	3.15831e-05	0.000548401	ENSMUST00000195571	Cenpl	UTR3
5655	peak_5655	chr5	145243713	145244138	10.8324	+	145243713	145244138	0	1	425	0	281	3804	375	2629	4.95361	3.77582	-1.09288	3.16422e-05	0.000548416	ENSMUST00000199322	Zfp655	UTR3
7297	peak_7297	chr7	19082292	19082692	10.8324	+	19082292	19082692	0	1	400	0	787	6354	871	5885	3.68164	2.73962	-0.886775	3.16312e-05	0.000548416	ENSMUST00000138997	Dmwd	UTR5
6428	peak_6428	chr6	48597482	48598157	10.8284	+	48597482	48598157	0	1	675	0	424	4388	547	4165	3.69966	2.52037	-1.09235	3.17605e-05	0.000549961	ENSMUST00000135151	Repin1	LastExon
2461	peak_2461	chr2	130635088	130635438	10.8196	-	130635088	130635438	0	1	350	0	80	897	160	990	3.33043	1.74245	-1.44576	3.19836e-05	0.000553317	ENSMUST00000045761	Lzts3	LastExon
1419	peak_1419	chr2	59842829	59843279	10.818	+	59842829	59843279	0	1	450	0	166	1495	258	1311	3.8785	2.3687	-1.37628	3.20788e-05	0.000553946	ENSMUST00000147650	Tanc1	UTR5
3409	peak_3409	chr3	69036887	69037887	10.818	-	69036887	69037887	0	1	1000	0	823	15342	998	8759	5.29266	4.09433	-1.1078	3.2073e-05	0.000553946	ENSMUST00000136512	Trim59	LastExon
19056	peak_19056	chrX	75574595	75574795	10.8142	-	75574595	75574795	0	1	200	0	156	1303	190	729	4.2929	2.78122	-1.37778	3.21928e-05	0.000555407	ENSMUST00000033545	Rab39b	LastExon
1666	peak_1666	chr2	121305378	121306528	10.8135	+	121305378	121306528	0	1	1150	0	507	5926	788	7761	3.7662	2.75148	-0.953616	3.22364e-05	0.00055565	ENSMUST00000110639	Map1a	Exon
1557	peak_1557	chr2	106867881	106868181	10.8108	+	106867881	106868181	0	1	300	0	810	10218	670	3840	4.90602	3.44913	-1.33363	3.23567e-05	0.000556706	ENSMUST00000111063	Mpped2	UTR3
16556	peak_16556	chr17	17387168	17387393	10.8108	+	17387168	17387393	0	1	225	0	411	2248	436	1229	3.68548	2.29565	-1.27397	3.23347e-05	0.000556706	ENSMUST00000232396	Riok2	LastExon
6420	peak_6420	chr6	47930887	47931537	10.8071	+	47930887	47931537	0	1	650	0	339	4364	402	3256	4.10313	2.74583	-1.24551	3.24885e-05	0.000558117	ENSMUST00000009411	Zfp212	LastExon
12551	peak_12551	chr11	36007230	36008355	10.8071	-	36007230	36008355	0	1	1125	0	394	11996	338	4791	6.13682	4.56048	-1.43308	3.24979e-05	0.000558117	ENSMUST00000163524	Tenm2	UTR3
6969	peak_6969	chr6	87580467	87581492	10.7997	-	87580467	87581492	0	1	1025	0	183	6322	201	3388	6.10069	4.43465	-1.51023	3.27248e-05	0.000560992	ENSMUST00000050887	Prokr1	UTR3
18928	peak_18928	chrX	153140355	153144021	10.7997	+	153140355	153144021	0	3	220,34,46	0,1008,3620	378	5737	356	3025	4.87679	3.42934	-1.32263	3.27013e-05	0.000560992	ENSMUST00000144175	Rragb	UTR5
2736	peak_2736	chr2	175167429	175167654	10.7986	-	175167429	175167654	0	1	225	0	15	450	56	391	6.12957	3.68537	-2.17153	3.28093e-05	0.00056142	ENSMUST00000109054	Gm14443	UTR3
17932	peak_17932	chr18	46734166	46734341	10.7986	-	46734166	46734341	0	1	175	0	214	1408	244	684	3.89135	2.46357	-1.30659	3.27939e-05	0.00056142	ENSMUST00000035648	Atg12	UTR3
5040	peak_5040	chr5	23501691	23503216	10.7932	+	23501691	23503216	0	1	1525	0	2171	45426	2132	29884	5.44931	4.29871	-1.07242	3.29785e-05	0.000563534	ENSMUST00000115128	Kmt2e	LastExon
12727	peak_12727	chr11	70977985	70978085	10.7932	-	70977985	70978085	0	1	100	0	294	1412	378	798	3.51005	1.96919	-1.40675	3.29926e-05	0.000563534	ENSMUST00000155371	C1qbp	UTR3
9367	peak_9367	chr8	70450752	70451152	10.7918	-	70450752	70451152	0	1	400	0	153	2214	249	1808	4.94919	3.39827	-1.41082	3.30551e-05	0.00056409	ENSMUST00000209567	Klhl26	UTR3
3734	peak_3734	chr4	8864291	8866898	10.7913	+	8864291	8866898	0	2	141161	0,1446	2081	80243	2087	52372	6.1507	4.88122	-1.16974	3.30961e-05	0.000564279	ENSMUST00000170391	Chd7	LastExon
2045	peak_2045	chr2	25706724	25708186	10.7908	-	25706724	25708186	0	2	631,94	0,1368	230	4046	345	4259	4.18404	2.93402	-1.15298	3.3179e-05	0.000564495	ENSMUST00000151069	A230005M16Rik	UTR3
12760	peak_12760	chr11	76210570	76211245	10.7908	-	76210570	76211245	0	1	675	0	199	3567	274	2528	5.39485	3.94714	-1.32464	3.31985e-05	0.000564495	ENSMUST00000102500	Gemin4	UTR3
14632	peak_14632	chr14	47016505	47052934	10.7908	+	47016505	47052934	0	2	290,85	0,36344	177	6305	210	3901	5.85761	4.25861	-1.45106	3.31617e-05	0.000564495	ENSMUST00000125113	Samd4	Exon
14621	peak_14621	chr14	43713901	43714176	10.7898	+	43713901	43714176	0	1	275	0	124	1031	228	777	4.28889	2.51208	-1.60316	3.32587e-05	0.000564872	ENSMUST00000094051	Gm7324	UTR5
17255	peak_17255	chr17	51739486	51740261	10.7898	-	51739486	51740261	0	1	775	0	919	32000	965	20363	6.33988	5.15252	-1.09979	3.32806e-05	0.000564872	ENSMUST00000140979	Satb1	UTR3
13542	peak_13542	chr12	41452822	41452997	10.7865	-	41452822	41452997	0	1	175	0	185	1423	213	643	4.17618	2.42298	-1.58331	3.3387e-05	0.000566168	ENSMUST00000043884	Lrrn3	LastExon
1392	peak_1392	chr2	38585492	38585767	10.7764	+	38585492	38585767	0	1	275	0	408	3380	381	1957	4.16098	2.8904	-1.1707	3.36821e-05	0.000570146	ENSMUST00000112895	Nek6	UTR3
15276	peak_15276	chr15	76370869	76371244	10.7764	+	76370869	76371244	0	1	375	0	52	2401	92	1722	6.54485	4.63913	-1.71209	3.36805e-05	0.000570146	ENSMUST00000023213	Hgh1	UTR3
16646	peak_16646	chr17	27895907	27896282	10.7741	+	27895907	27896282	0	1	375	0	114	2677	153	1709	5.25232	3.51314	-1.57103	3.37653e-05	0.000571042	ENSMUST00000114849	Uhrf1bp1	LastExon
1682	peak_1682	chr2	127297240	127297640	10.7549	+	127297240	127297640	0	1	400	0	413	8900	487	5110	5.60813	4.03847	-1.42802	3.42487e-05	0.000578699	ENSMUST00000125049	Stard7	LastExon
6548	peak_6548	chr6	90402151	90402351	10.7548	+	90402151	90402351	0	1	200	0	33	458	80	385	4.8	2.67256	-1.90054	3.42829e-05	0.000578757	ENSMUST00000075117	Zxdc	UTR3
17771	peak_17771	chr18	83001997	83002172	10.7521	+	83001997	83002172	0	1	175	0	254	1498	321	965	3.55969	1.98985	-1.42681	3.43763e-05	0.000579816	ENSMUST00000071233	Zfp516	UTR3
3729	peak_3729	chr4	8752242	8753217	10.7479	+	8752242	8753217	0	1	975	0	2643	33933	3007	27414	4.31381	3.11912	-1.10501	3.45075e-05	0.000581508	ENSMUST00000170457	Chd7	UTR5
16289	peak_16289	chr16	17900985	17902185	10.7444	-	17900985	17902185	0	1	1200	0	356	12569	398	8343	5.96053	4.57028	-1.26932	3.4623e-05	0.000582934	ENSMUST00000003621	Ess2	UTR3
7823	peak_7823	chr7	127784877	127785896	10.7427	+	127784877	127785896	0	2	859,16	0,1003	605	5333	822	5365	3.60491	2.45719	-1.0654	3.47244e-05	0.000583599	ENSMUST00000047157	Setd1a	Exon
16780	peak_16780	chr17	45520369	45520842	10.7427	+	45520369	45520842	0	1	473	0	119	1829	163	1381	4.49905	2.93955	-1.41789	3.47072e-05	0.000583599	ENSMUST00000232693	Aars2	UTR5
16597	peak_16597	chr17	23818000	23818625	10.7415	+	23818000	23818625	0	1	625	0	3564	20311	3867	17003	3.71939	2.85427	-0.814702	3.47857e-05	0.000584109	ENSMUST00000088621	Srrm2	Exon
8636	peak_8636	chr8	4255731	4256106	10.7409	+	4255731	4256106	0	1	375	0	237	3159	286	2409	4.55212	3.21441	-1.22796	3.48308e-05	0.000584345	ENSMUST00000208316	Snapc2	LastExon
4374	peak_4374	chr4	25610481	25610681	10.7405	-	25610481	25610681	0	1	200	0	114	1768	130	524	5.01056	2.9576	-1.83719	3.49034e-05	0.000584524	ENSMUST00000084770	Fut9	UTR3
16340	peak_16340	chr16	33960282	33962098	10.7405	-	33960282	33962098	0	2	70530	0,1286	758	7584	920	5382	4.29985	2.90923	-1.28241	3.48786e-05	0.000584524	ENSMUST00000131990	Umps	UTR3
12111	peak_12111	chr11	80032028	80032403	10.7401	+	80032028	80032403	0	1	375	0	504	9608	506	4124	5.45472	3.97147	-1.35332	3.49437e-05	0.000584679	ENSMUST00000163272	Suz12	LastExon
15301	peak_15301	chr15	78940642	78941067	10.7325	+	78940642	78941067	0	1	425	0	189	9433	229	6482	6.46429	4.99418	-1.34094	3.51597e-05	0.000587771	ENSMUST00000138880	Nol12	UTR3
8723	peak_8723	chr8	31237726	31260831	10.7227	+	31237726	31260831	0	2	68932	0,22173	163	6475	233	4304	6.56814	5.04672	-1.38433	3.54291e-05	0.000591751	ENSMUST00000161502	Fut10	LastExon
7604	peak_7604	chr7	80225160	80226335	10.7205	+	80225160	80226335	0	1	1175	0	308	7694	337	5254	5.53474	4.21307	-1.21521	3.55842e-05	0.000592664	ENSMUST00000205822	Sema4b	LastExon
7805	peak_7805	chr7	127237781	127238056	10.7205	+	127237781	127238056	0	1	275	0	306	1437	410	1162	3.34964	2.05039	-1.19471	3.56095e-05	0.000592664	ENSMUST00000056232	Zfp553	UTR3
15373	peak_15373	chr15	89100071	89100340	10.7205	+	89100071	89100340	0	1	269	0	218	1508	253	943	3.8446	2.33995	-1.37076	3.56072e-05	0.000592664	ENSMUST00000164717	Tubgcp6	UTR3
18129	peak_18129	chr19	6339808	6340883	10.7205	+	6339808	6340883	0	1	1075	0	1102	8052	1240	6298	3.61362	2.41335	-1.11027	3.55271e-05	0.000592664	ENSMUST00000156154	Men1	UTR5
13543	peak_13543	chr12	41453047	41454397	10.7152	-	41453047	41454397	0	1	1350	0	381	8199	457	5340	5.67292	4.39145	-1.17908	3.57718e-05	0.00059484	ENSMUST00000043884	Lrrn3	LastExon
7986	peak_7986	chr7	16563558	16563708	10.7121	-	16563558	16563708	0	1	150	0	822	2706	873	1734	2.9566	1.80044	-1.07214	3.59097e-05	0.000596123	ENSMUST00000171937	Arhgap35	Exon
17761	peak_17761	chr18	80118972	80119547	10.7121	+	80118972	80119547	0	1	575	0	189	2463	279	1551	4.96678	3.38559	-1.43603	3.59121e-05	0.000596123	ENSMUST00000070219	Pard6g	UTR3
7848	peak_7848	chr7	130728859	130731561	10.7119	+	130728859	130731561	0	2	969,31	0,2671	1491	39888	1413	26046	5.60569	4.43461	-1.08639	3.59496e-05	0.000596219	ENSMUST00000209108	Tacc2	UTR5
1275	peak_1275	chr2	26636015	26636490	10.7103	+	26636015	26636490	0	1	475	0	248	3298	294	2303	4.24818	2.77584	-1.34315	3.61082e-05	0.000596859	ENSMUST00000074240	Fam69b	LastExon
2049	peak_2049	chr2	25938666	25938966	10.7103	-	25938666	25938966	0	1	300	0	1114	7238	1024	4652	3.75223	2.65579	-1.01862	3.61408e-05	0.000596859	ENSMUST00000143977	Camsap1	UTR3
2096	peak_2096	chr2	27448103	27448528	10.7103	-	27448103	27448528	0	1	425	0	697	9839	636	5529	4.62347	3.291	-1.22454	3.60851e-05	0.000596859	ENSMUST00000164296	Brd3	UTR3
9195	peak_9195	chr8	8623190	8660773	10.7103	-	8623190	8660773	0	3	50284290	0,16015,37293	2940	91613	2648	55196	5.94929	4.75047	-1.1103	3.61464e-05	0.000596859	ENSMUST00000209169	Efnb2	UTR3
11026	peak_11026	chr10	80130452	80130677	10.7103	+	80130452	80130677	0	1	225	0	764	3374	760	2327	3.2062	2.08422	-1.04198	3.60489e-05	0.000596859	ENSMUST00000147778	Cbarp	UTR3
13739	peak_13739	chr12	100942036	100945908	10.7084	-	100942036	100945908	0	2	881062	0,2810	2613	25501	2390	18143	3.35044	2.26223	-1.01253	3.62252e-05	0.000597636	ENSMUST00000085096	Ccdc88c	Exon
11025	peak_11025	chr10	80116327	80117759	10.7057	+	80116327	80117759	0	2	580,95	0,1337	908	7411	1100	5730	3.40442	2.05797	-1.24226	3.63255e-05	0.000598768	ENSMUST00000128992	Stk11	UTR5
1719	peak_1719	chr2	131246455	131246755	10.6923	+	131246455	131246755	0	1	300	0	64	1081	124	834	4.88156	2.86826	-1.8073	3.66971e-05	0.000604364	ENSMUST00000130597	Mavs	UTR3
3916	peak_3916	chr4	63134356	63134781	10.688	+	63134356	63134781	0	1	425	0	180	1520	290	1467	4.28728	3.02586	-1.16201	3.68384e-05	0.000606163	ENSMUST00000107415	Zfp618	UTR3
10793	peak_10793	chr10	11290561	11295480	10.6854	+	11290561	11295480	0	2	1011264	0,4655	931	15269	1151	10604	5.28728	4.10099	-1.09765	3.695e-05	0.000607259	ENSMUST00000070300	Fbxo30	Exon
13857	peak_13857	chr13	24812873	24813248	10.6854	+	24812873	24813248	0	1	375	0	493	16173	570	10114	6.18923	5.10063	-1.01335	3.69694e-05	0.000607259	ENSMUST00000019276	BC005537	UTR3
1696	peak_1696	chr2	129125464	129125889	10.6836	+	129125464	129125889	0	1	425	0	146	2335	242	1828	5.05407	3.35622	-1.53405	3.70482e-05	0.000608023	ENSMUST00000103205	Polr1b	LastExon
6743	peak_6743	chr6	149325635	149326360	10.6827	+	149325635	149326360	0	1	725	0	251	3221	317	2136	4.90375	3.67491	-1.13494	3.71041e-05	0.000608411	ENSMUST00000190785	Resf1	LastExon
6363	peak_6363	chr6	30152776	30153101	10.6758	+	30152776	30153101	0	1	325	0	118	2416	158	1534	5.54254	3.8936	-1.49233	3.73141e-05	0.000611322	ENSMUST00000115211	Nrf1	UTR3
13830	peak_13830	chr13	14637279	14637779	10.6737	+	14637279	14637779	0	1	500	0	275	4804	374	3415	5.34156	3.91782	-1.30075	3.74322e-05	0.000612194	ENSMUST00000038690	AW209491	LastExon
16694	peak_16694	chr17	32810293	32821176	10.6737	+	32810293	32821176	0	4	45,30,72,203	0,1276,9020,10680	94	3226	151	2064	6.32988	4.68253	-1.4892	3.74134e-05	0.000612194	ENSMUST00000201876	Zfp799	UTR3
1887	peak_1887	chr2	164891035	164891435	10.6728	+	164891035	164891435	0	1	400	0	308	3706	342	2588	3.92266	2.55828	-1.24976	3.74876e-05	0.000612567	ENSMUST00000041643	Pcif1	LastExon
7581	peak_7581	chr7	75872920	75873345	10.6707	+	75872920	75873345	0	1	425	0	263	4126	266	2149	4.53173	2.88772	-1.48783	3.75922e-05	0.000613463	ENSMUST00000092073	Klhl25	UTR3
7753	peak_7753	chr7	118722619	118724485	10.6707	+	118722619	118724485	0	2	419,31	0,1835	879	11094	928	6458	4.89843	3.58551	-1.20856	3.76074e-05	0.000613463	ENSMUST00000123178	Ccp110	Exon
18931	peak_18931	chrX	153499206	153499681	10.6603	+	153499206	153499681	0	1	475	0	1831	18729	2163	14997	3.94519	2.69852	-1.14877	3.79127e-05	0.000617908	ENSMUST00000060714	Ubqln2	LastExon
4014	peak_4014	chr4	109983465	109983640	10.6571	+	109983465	109983640	0	1	175	0	337	2795	387	1242	4.24614	2.35536	-1.69733	3.80609e-05	0.000619276	ENSMUST00000061187	Dmrta2	UTR3
4252	peak_4252	chr4	147187932	147188157	10.6571	+	147187932	147188157	0	1	225	0	47	605	114	464	4.78871	2.56025	-1.98502	3.80623e-05	0.000619276	ENSMUST00000118508	Gm13146	UTR5
16359	peak_16359	chr16	37535645	37536045	10.655	-	37535645	37536045	0	1	400	0	368	3899	409	2251	4.67456	3.32602	-1.23624	3.81506e-05	0.000620177	ENSMUST00000130350	Gtf2e1	UTR3
15929	peak_15929	chr16	8830174	8856400	10.6487	+	8830174	8856400	0	4	511,81,276,607	0,1146,12793,25619	2167	39065	2605	33053	5.01125	3.84855	-1.08251	3.83518e-05	0.000622911	ENSMUST00000023150	1810013L24Rik	LastExon
598	peak_598	chr1	30803541	30804591	10.6472	-	30803541	30804591	0	1	1050	0	2103	65364	2360	47677	6.17259	5.0685	-1.02945	3.85562e-05	0.000623545	ENSMUST00000191329	Phf3	UTR3
9513	peak_9513	chr8	105281659	105282034	10.6472	-	105281659	105282034	0	1	375	0	489	5097	544	3442	4.29491	2.95903	-1.22505	3.85181e-05	0.000623545	ENSMUST00000212219	4931428F04Rik	UTR3
12298	peak_12298	chr11	105139770	105140045	10.6472	+	105139770	105140045	0	1	275	0	112	1446	166	987	4.92706	3.3498	-1.43053	3.85438e-05	0.000623545	ENSMUST00000021030	Mettl2	UTR3
17440	peak_17440	chr18	25090159	25090809	10.6472	+	25090159	25090809	0	1	650	0	418	6247	458	3790	4.52201	3.00314	-1.38236	3.85335e-05	0.000623545	ENSMUST00000234834	Fhod3	Exon
18336	peak_18336	chr19	44303186	44303561	10.6472	+	44303186	44303561	0	1	375	0	5330	70705	4876	35998	4.94782	3.62962	-1.21003	3.84308e-05	0.000623545	ENSMUST00000237039	Scd2	UTR3
10147	peak_10147	chr9	119042408	119042633	10.6472	+	119042408	119042633	0	1	225	0	41	548	90	493	4.75992	2.89173	-1.67808	3.86428e-05	0.000623567	ENSMUST00000073109	Ctdspl	UTR3
16804	peak_16804	chr17	46891395	46891970	10.6472	+	46891395	46891970	0	1	575	0	203	6511	290	4900	6.09302	4.54826	-1.40414	3.86322e-05	0.000623567	ENSMUST00000040434	Tbcc	LastExon
18511	peak_18511	chr19	8811524	8811824	10.6472	-	8811524	8811824	0	1	300	0	251	2829	329	1526	4.74491	3.01699	-1.55883	3.86567e-05	0.000623567	ENSMUST00000088092	Ttc9c	UTR3
12161	peak_12161	chr11	87614737	87615137	10.647	+	87614737	87615137	0	1	400	0	406	8376	410	4630	5.60965	4.3074	-1.19761	3.8694e-05	0.000623635	ENSMUST00000119628	Mtmr4	UTR3
192	peak_192	chr1	74698538	74698738	10.6461	+	74698538	74698738	0	1	200	0	454	2358	586	1458	3.52186	1.921	-1.45233	3.87509e-05	0.000624018	ENSMUST00000042125	Ttll4	UTR3
4566	peak_4566	chr4	95051683	95052222	10.6405	-	95051683	95052222	0	1	539	0	848	9398	857	6856	3.61877	2.39609	-1.12971	3.9002e-05	0.000626457	ENSMUST00000107094	Jun	UTR5
5258	peak_5258	chr5	92942868	92950488	10.6405	+	92942868	92950488	0	3	271,74,5	0,5535,7615	226	2590	322	2376	3.2822	1.91111	-1.2551	3.89873e-05	0.000626457	ENSMUST00000113051	Shroom3	Exon
18286	peak_18286	chr19	38524068	38524343	10.6405	+	38524068	38524343	0	1	275	0	184	4037	195	1993	5.69565	4.11028	-1.43772	3.89455e-05	0.000626457	ENSMUST00000169713	Plce1	UTR5
883	peak_883	chr1	132359649	132360624	10.6361	-	132359649	132360624	0	1	975	0	382	11153	407	8122	5.73232	4.54186	-1.09997	3.91554e-05	0.000628386	ENSMUST00000138717	Tmcc2	UTR3
50	peak_50	chr1	34228616	34228866	10.6348	+	34228616	34228866	0	1	250	0	387	2396	404	1501	3.53146	2.17569	-1.24208	3.92225e-05	0.000628927	ENSMUST00000185269	Dst	Exon
9684	peak_9684	chr9	19646949	19647374	10.634	+	19646949	19647374	0	1	425	0	358	7731	378	4865	5.63572	4.35482	-1.17763	3.9279e-05	0.000629298	ENSMUST00000079042	Zfp317	LastExon
6939	peak_6939	chr6	83367972	83369472	10.6323	-	83367972	83369472	0	1	1500	0	3360	83956	3448	69534	4.88791	3.85533	-0.963421	3.93756e-05	0.000630025	ENSMUST00000089622	Tet3	UTR3
14722	peak_14722	chr14	61204837	61205637	10.6323	+	61204837	61205637	0	1	800	0	510	6426	670	4490	4.80239	3.71465	-1.01274	3.93912e-05	0.000630025	ENSMUST00000119943	Sacs	LastExon
3144	peak_3144	chr3	105717236	105717411	10.6268	+	105717236	105717411	0	1	175	0	30	332	90	343	4.54747	2.34623	-1.96073	3.95747e-05	0.000632423	ENSMUST00000098273	Inka2	UTR3
1812	peak_1812	chr2	154535031	154535981	10.6255	+	154535031	154535981	0	1	950	0	740	10301	687	5574	4.93343	3.601	-1.22376	3.96448e-05	0.000633008	ENSMUST00000137526	Cbfa2t2	LastExon
16506	peak_16506	chr17	5341731	5343281	10.6234	+	5341731	5343281	0	1	1550	0	2209	74890	2186	49501	5.99578	4.79291	-1.1131	3.97366e-05	0.000633937	ENSMUST00000115799	Arid1b	LastExon
4781	peak_4781	chr4	133684919	133685519	10.6232	-	133684919	133685519	0	1	600	0	2422	21637	2585	21394	3.51597	2.67975	-0.792283	3.97939e-05	0.000634009	ENSMUST00000008024	Arid1a	Exon
10449	peak_10449	chr9	57256477	57257677	10.6232	-	57256477	57257677	0	1	1200	0	227	5900	402	6913	4.95382	3.62521	-1.21834	3.98396e-05	0.000634009	ENSMUST00000213199	1700017B05Rik	LastExon
18277	peak_18277	chr19	37221518	37221868	10.6232	+	37221518	37221868	0	1	350	0	593	4321	576	2076	4.10004	2.76195	-1.22673	3.9842e-05	0.000634009	ENSMUST00000128530	March5	UTR3
3758	peak_3758	chr4	17853567	17853792	10.6209	+	17853567	17853792	0	1	225	0	439	2533	487	1796	3.58598	2.36129	-1.12951	3.99408e-05	0.000635046	ENSMUST00000133416	Mmp16	UTR5
5098	peak_5098	chr5	31511033	31511483	10.6204	+	31511033	31511483	0	1	450	0	263	6855	279	4162	5.93058	4.65637	-1.17276	3.99882e-05	0.000635263	ENSMUST00000076949	Gpn1	UTR3
8979	peak_8979	chr8	105663939	105664926	10.6192	+	105663939	105664926	0	2	604,71	0,916	1765	26600	1635	15220	5.12306	3.95332	-1.08191	4.00889e-05	0.000635791	ENSMUST00000005841	Ctcf	Exon
19133	peak_19133	chrX	133682191	133685601	10.6192	-	133682191	133685601	0	2	41484	0,2926	319	5625	407	3602	5.38014	3.85006	-1.39134	4.00818e-05	0.000635791	ENSMUST00000060309	Pcdh19	Exon
2235	peak_2235	chr2	69702526	69702701	10.6168	-	69702526	69702701	0	1	175	0	60	543	103	287	4.37888	2.19046	-1.9479	4.01879e-05	0.000636826	ENSMUST00000102706	Fastkd1	Exon
3627	peak_3627	chr3	116110469	116110919	10.6133	-	116110469	116110919	0	1	450	0	165	2555	251	1292	5.14975	3.33615	-1.63042	4.03188e-05	0.000638363	ENSMUST00000029574	Vcam1	UTR3
16240	peak_16240	chr16	4154952	4180067	10.6114	-	4154952	4180067	0	2	81644	0,24471	2113	26277	2158	19224	4.61747	3.51064	-1.02953	4.0408e-05	0.000639239	ENSMUST00000205765	Crebbp	Exon
3737	peak_3737	chr4	9449550	9449725	10.6094	+	9449550	9449725	0	1	175	0	346	4856	323	1964	5.06298	3.45199	-1.4594	4.0496e-05	0.000640094	ENSMUST00000108339	Asph	UTR3
4780	peak_4780	chr4	133679982	133684436	10.6083	-	133679982	133684436	0	2	2073,2	0,4452	6274	136495	6625	107119	5.4594	4.421	-0.968215	4.05626e-05	0.000640611	ENSMUST00000008024	Arid1a	UTR3
13760	peak_13760	chr12	103418969	103419419	10.6066	-	103418969	103419419	0	1	450	0	639	12417	675	8043	5.37559	4.07985	-1.18925	4.0644e-05	0.000641359	ENSMUST00000221211	Ddx24	Exon
13549	peak_13549	chr12	51748413	51748938	10.6026	-	51748413	51748938	0	1	525	0	408	7699	484	5723	5.48655	4.43471	-0.983114	4.07902e-05	0.000643128	ENSMUST00000179265	Hectd1	Exon
4671	peak_4671	chr4	121147247	121148547	10.6	-	121147247	121148547	0	1	1300	0	936	18772	1094	13201	5.56895	4.4619	-1.0274	4.08969e-05	0.000644271	ENSMUST00000056635	Rlf	LastExon
4031	peak_4031	chr4	116088603	116089453	10.5927	+	116088603	116089453	0	1	850	0	668	5640	634	3769	3.66962	2.47583	-1.10427	4.11391e-05	0.000647546	ENSMUST00000030471	Lrrc41	Exon
11978	peak_11978	chr11	68699301	68699526	10.5924	+	68699301	68699526	0	1	225	0	2165	9079	2159	6325	3.27696	2.25863	-0.950743	4.11831e-05	0.000647698	ENSMUST00000155765	Myh10	UTR5
10463	peak_10463	chr9	58196997	58198772	10.5815	-	58196997	58198772	0	1	1775	0	10740	119193	11050	103633	3.7972	2.83004	-0.906132	4.15638e-05	0.000652597	ENSMUST00000215950	Islr2	UTR3
11743	peak_11743	chr11	20647919	20649194	10.5815	+	20647919	20649194	0	1	1275	0	586	12617	617	8296	5.51439	4.26262	-1.14851	4.15365e-05	0.000652597	ENSMUST00000109585	Sertad2	LastExon
15944	peak_15944	chr16	13147937	13148437	10.5804	+	13147937	13148437	0	1	500	0	73	4568	116	3371	6.68637	4.93262	-1.57251	4.16317e-05	0.000653119	ENSMUST00000129049	Ercc4	UTR3
12415	peak_12415	chr11	120289496	120290003	10.5794	+	120289496	120290003	0	2	48327	0,180	480	2803	542	2688	2.79198	1.81849	-0.910348	4.16947e-05	0.000653563	ENSMUST00000143667	Bahcc1	UTR5
3940	peak_3940	chr4	86576047	86576422	10.5735	+	86576047	86576422	0	1	375	0	659	5878	817	4926	4.2253	3.05421	-1.08325	4.19697e-05	0.000656238	ENSMUST00000091064	Rraga	LastExon
5119	peak_5119	chr5	33895002	33895327	10.5735	+	33895002	33895327	0	1	325	0	849	9301	833	5360	4.08605	2.63343	-1.32667	4.19228e-05	0.000656238	ENSMUST00000202525	Nsd2	UTR3
18030	peak_18030	chr18	78754829	78755804	10.5735	-	78754829	78755804	0	1	975	0	1639	19218	1376	11062	3.96759	2.72576	-1.14354	4.19516e-05	0.000656238	ENSMUST00000025430	Setbp1	UTR3
4851	peak_4851	chr4	141468214	141468914	10.5661	-	141468214	141468914	0	1	700	0	478	25956	516	18905	6.86435	5.73981	-1.04218	4.22388e-05	0.000659604	ENSMUST00000147227	Spen	UTR3
13028	peak_13028	chr11	115497352	115497452	10.5661	-	115497352	115497452	0	1	100	0	563	3342	579	2243	3.55389	2.31118	-1.1453	4.2255e-05	0.000659604	ENSMUST00000021083	Jpt1	UTR3
14716	peak_14716	chr14	60762829	60763079	10.5618	+	60762829	60763079	0	1	250	0	219	1758	298	1448	4.24121	3.13282	-1.0292	4.24163e-05	0.000661576	ENSMUST00000162945	Spata13	UTR3
4509	peak_4509	chr4	62523673	62524330	10.5605	-	62523673	62524330	0	2	437,13	0,644	1893	14188	2116	9423	4.13542	2.89177	-1.14654	4.24891e-05	0.000662163	ENSMUST00000128100	Pole3	UTR3
6009	peak_6009	chr5	113745172	113745777	10.5522	-	113745172	113745777	0	2	27198	0,407	721	3388	793	2397	3.02285	1.73504	-1.18325	4.27709e-05	0.000666004	ENSMUST00000197041	Sart3	UTR3
7023	peak_7023	chr6	112721845	112722270	10.5465	-	112721845	112722270	0	1	425	0	681	5323	607	2593	4.07603	2.66955	-1.28412	4.29741e-05	0.000668616	ENSMUST00000113169	Srgap3	UTR3
5832	peak_5832	chr5	38671158	38672533	10.5456	-	38671158	38672533	0	1	1375	0	1315	26101	1335	16023	5.46836	4.20157	-1.16812	4.30547e-05	0.000669061	ENSMUST00000057258	Zfp518b	UTR3
17726	peak_17726	chr18	67479714	67479889	10.5456	+	67479714	67479889	0	1	175	0	126	885	143	357	4.03715	2.03308	-1.78932	4.30737e-05	0.000669061	ENSMUST00000025411	Prelid3a	UTR3
8695	peak_8695	chr8	22932199	22932499	10.5446	+	22932199	22932499	0	1	300	0	1039	5662	1115	3795	3.56822	2.32383	-1.14611	4.31845e-05	0.000669515	ENSMUST00000044331	Kat6a	Exon
12842	peak_12842	chr11	87231230	87231855	10.5446	-	87231230	87231855	0	1	625	0	1046	26880	966	13317	5.82573	4.39716	-1.30403	4.32094e-05	0.000669515	ENSMUST00000055438	Ppm1e	LastExon
16459	peak_16459	chr16	90773441	90774727	10.5446	-	90773441	90774727	0	2	21679	0,607	120	3145	151	1938	5.16768	3.45787	-1.54099	4.31829e-05	0.000669515	ENSMUST00000140920	Urb1	Exon
6570	peak_6570	chr6	95127272	95127347	10.5408	+	95127272	95127347	0	1	75	0	7	245	36	122	6.18254	2.72253	-3.02984	4.33583e-05	0.00067127	ENSMUST00000119582	Kbtbd8	UTR3
9299	peak_9299	chr8	47193534	47194084	10.5368	-	47193534	47194084	0	1	550	0	1826	28424	1721	20310	4.94423	3.91042	-0.962622	4.35144e-05	0.000673135	ENSMUST00000209337	Stox2	UTR3
15450	peak_15450	chr15	102431004	102431279	10.5325	+	102431004	102431279	0	1	275	0	562	3715	648	2518	3.92816	2.686	-1.14272	4.36808e-05	0.000675155	ENSMUST00000001326	Sp1	LastExon
600	peak_600	chr1	30824307	30831280	10.526	-	30824307	30831280	0	2	2121438	0,5535	2006	34112	2176	22806	5.33622	4.24819	-1.01049	4.39496e-05	0.000678197	ENSMUST00000185521	Phf3	UTR3
14801	peak_14801	chr14	76417860	76437741	10.526	+	76417860	76437741	0	2	1149,76	0,19805	3235	27166	3413	23673	3.8728	2.92794	-0.886202	4.39387e-05	0.000678197	ENSMUST00000176886	Tsc22d1	Exon
3967	peak_3967	chr4	101002944	101003869	10.5213	+	101002944	101003869	0	1	925	0	1625	60404	1624	29663	6.36007	4.79068	-1.42179	4.41665e-05	0.000680431	ENSMUST00000030257	Cachd1	LastExon
9008	peak_9008	chr8	106882824	106884561	10.5213	+	106882824	106884561	0	2	78347	0,1390	447	4720	510	2848	4.60931	3.15714	-1.32148	4.41379e-05	0.000680431	ENSMUST00000175940	Chtf8	UTR3
7333	peak_7333	chr7	24533351	24534901	10.5202	+	24533351	24534901	0	1	1550	0	1280	20067	1240	13461	3.93072	2.68615	-1.14526	4.42572e-05	0.000680933	ENSMUST00000049020	Irgq	LastExon
13227	peak_13227	chr12	57238437	57239412	10.5202	+	57238437	57239412	0	1	975	0	1341	42199	1585	28292	6.21995	4.96368	-1.15796	4.42713e-05	0.000680933	ENSMUST00000139049	Prps1l3	LastExon
18250	peak_18250	chr19	25622755	25623920	10.5193	+	25622755	25623920	0	1	1165	0	422	11056	466	6006	5.79584	4.17215	-1.47039	4.43361e-05	0.000681374	ENSMUST00000048935	Dmrt3	LastExon
12141	peak_12141	chr11	84008621	84019271	10.5192	+	84008621	84019271	0	2	929,71	0,10579	1018	15718	939	9720	5.08833	3.97161	-1.03625	4.43757e-05	0.000681427	ENSMUST00000183456	Synrg	Exon
5380	peak_5380	chr5	114138482	114138757	10.5106	+	114138482	114138757	0	1	275	0	98	2517	118	1382	5.62178	3.86584	-1.57973	4.4711e-05	0.00068546	ENSMUST00000112275	Ung	UTR3
12859	peak_12859	chr11	94287939	94288264	10.5106	-	94287939	94288264	0	1	325	0	277	3269	345	2071	4.80072	3.44629	-1.23859	4.4699e-05	0.00068546	ENSMUST00000166312	Luc7l3	UTR3
4619	peak_4619	chr4	116804236	116804911	10.5071	-	116804236	116804911	0	1	675	0	365	5590	440	3943	5.04399	3.70573	-1.22365	4.48576e-05	0.000687121	ENSMUST00000030451	Toe1	UTR3
10242	peak_10242	chr9	15997429	15997479	10.5071	-	15997429	15997479	0	1	50	0	109	611	138	326	3.69925	1.94277	-1.58118	4.48922e-05	0.000687121	ENSMUST00000082170	Fat3	Exon
307	peak_307	chr1	127482568	127483043	10.5053	+	127482568	127483043	0	1	475	0	259	6417	274	3958	5.66422	4.30011	-1.24703	4.50193e-05	0.000687988	ENSMUST00000171405	Mgat5	LastExon
4392	peak_4392	chr4	34809487	34810512	10.5053	-	34809487	34810512	0	1	1025	0	1737	15572	1762	9320	4.39906	3.20537	-1.10209	4.50219e-05	0.000687988	ENSMUST00000047950	Zfp292	LastExon
11982	peak_11982	chr11	69048513	69048974	10.5016	+	69048513	69048974	0	2	131244	0,217	571	10261	593	5938	5.35253	3.98758	-1.24926	4.51765e-05	0.000689791	ENSMUST00000149018	Aurkb	UTR5
13272	peak_13272	chr12	75930889	75933902	10.4992	+	75930889	75933902	0	2	260,65	0,2948	1533	9200	1245	4361	3.8236	2.55498	-1.17065	4.52876e-05	0.000690929	ENSMUST00000044217	Syne2	Exon
8137	peak_8137	chr7	37493704	37568429	10.4973	-	37493704	37568429	0	2	134616	0,74109	536	9342	631	7084	4.58663	3.25316	-1.22081	4.53831e-05	0.000691827	ENSMUST00000176205	Zfp536	Exon
10169	peak_10169	chr9	121763025	121763725	10.4949	+	121763025	121763725	0	1	700	0	550	11444	717	9056	4.38032	2.96241	-1.29291	4.54952e-05	0.000692976	ENSMUST00000093772	Zfp651	Exon
351	peak_351	chr1	133132067	133132592	10.4902	+	133132067	133132592	0	1	525	0	432	3960	462	2937	3.91743	2.68507	-1.13792	4.56816e-05	0.000695252	ENSMUST00000052529	Ppp1r15b	Exon
8800	peak_8800	chr8	69824045	69824270	10.4888	+	69824045	69824270	0	1	225	0	19	557	49	415	5.08497	2.58451	-2.20793	4.57615e-05	0.000695907	ENSMUST00000034325	Lpar2	Exon
18729	peak_18729	chrX	48370196	48370946	10.4831	+	48370196	48370946	0	1	750	0	382	8961	489	7772	5.34736	4.10019	-1.14437	4.59811e-05	0.000698682	ENSMUST00000142160	Bcorl1	Exon
14521	peak_14521	chr13	119766086	119776195	10.4788	-	119766086	119776195	0	3	940131429	0,2619,9680	2077	44642	2191	25603	5.66715	4.46811	-1.09262	4.61554e-05	0.000700766	ENSMUST00000223813	Zfp131	UTR3
14712	peak_14712	chr14	60691012	60691712	10.4764	+	60691012	60691712	0	1	700	0	754	4766	837	4240	2.93628	1.87561	-0.986542	4.62686e-05	0.00070192	ENSMUST00000159729	Spata13	LastExon
5478	peak_5478	chr5	124460699	124460899	10.4709	+	124460699	124460899	0	1	200	0	308	1791	348	1149	3.78566	2.58801	-1.10512	4.65578e-05	0.000704607	ENSMUST00000100709	Kmt5a	UTR3
13391	peak_13391	chr12	102744109	102745342	10.4709	+	102744109	102745342	0	2	57743	0,490	255	5467	288	3302	5.66205	4.42347	-1.14086	4.65231e-05	0.000704607	ENSMUST00000057416	Tmem251	LastExon
18876	peak_18876	chrX	134689486	134691186	10.4709	+	134689486	134691186	0	1	1700	0	3555	100681	3395	60591	5.97596	4.77186	-1.10985	4.65034e-05	0.000704607	ENSMUST00000124226	Armcx4	LastExon
2954	peak_2954	chr3	84903578	84925553	10.47	+	84903578	84925553	0	2	501,74	0,21901	804	23247	905	14887	6.06199	4.75156	-1.20069	4.67307e-05	0.000705055	ENSMUST00000151410	Fbxw7	UTR5
3292	peak_3292	chr3	25432910	25433785	10.47	-	25432910	25433785	0	1	875	0	146	6077	187	2943	6.50183	4.9539	-1.40342	4.66899e-05	0.000705055	ENSMUST00000075054	Nlgn1	UTR3
5776	peak_5776	chr5	31515443	31515768	10.47	-	31515443	31515768	0	1	325	0	165	4313	200	2742	5.78143	4.26605	-1.37375	4.66712e-05	0.000705055	ENSMUST00000200721	Supt7l	UTR3
15112	peak_15112	chr14	97916517	98168873	10.47	-	97916517	98168873	0	4	31162116391	0,53289,102360,251965	2106	21854	2057	11636	4.00247	2.44163	-1.41396	4.6737e-05	0.000705055	ENSMUST00000156684	Dach1	UTR3
1154	peak_1154	chr1	189648852	189649027	10.4662	-	189648852	189649027	0	1	175	0	814	3580	822	1887	3.37861	2.02193	-1.24037	4.68961e-05	0.00070689	ENSMUST00000171929	Cenpf	Exon
6555	peak_6555	chr6	91487093	91487943	10.4539	+	91487093	91487943	0	1	850	0	331	4012	446	3018	4.6375	3.22033	-1.29088	4.73376e-05	0.000712975	ENSMUST00000032183	Tmem43	UTR3
2656	peak_2656	chr2	165379613	165380413	10.4522	-	165379613	165380413	0	1	800	0	861	21239	956	15492	5.66871	4.46908	-1.10403	4.74306e-05	0.000713805	ENSMUST00000103084	Zfp334	UTR3
15697	peak_15697	chr15	78755981	78756156	10.4494	-	78755981	78756156	0	1	175	0	254	1327	255	793	3.38774	1.98227	-1.28276	4.75615e-05	0.000715205	ENSMUST00000018313	Mfng	UTR3
7171	peak_7171	chr6	134760905	134761205	10.442	-	134760905	134761205	0	1	300	0	478	6455	480	3282	4.99684	3.67864	-1.20699	4.78816e-05	0.000718872	ENSMUST00000149776	Dusp16	Exon
17626	peak_17626	chr18	37755940	37756640	10.442	+	37755940	37756640	0	1	700	0	901	8723	1031	6826	4.09687	2.90119	-1.10204	4.78796e-05	0.000718872	ENSMUST00000192805	Gm26672	UTR3
9517	peak_9517	chr8	105727157	105728234	10.4363	-	105727157	105728234	0	2	3247	0,830	427	2427	569	2460	3.04525	1.96134	-1.00587	4.81454e-05	0.000721683	ENSMUST00000135959	Gfod2	UTR3
10032	peak_10032	chr9	106838409	106838609	10.4363	+	106838409	106838609	0	1	200	0	496	2747	548	1708	3.71235	2.49481	-1.1202	4.81377e-05	0.000721683	ENSMUST00000161758	Dcaf1	Exon
11012	peak_11012	chr10	79819120	79819595	10.4307	+	79819120	79819595	0	1	475	0	2407	17271	2440	14069	2.80298	1.77071	-0.961646	4.83742e-05	0.000724537	ENSMUST00000220365	Palm	LastExon
7353	peak_7353	chr7	25363358	25364133	10.429	+	25363358	25364133	0	1	775	0	314	6088	372	4981	4.3943	3.13297	-1.15994	4.84674e-05	0.000725357	ENSMUST00000153077	Megf8	UTR5
10065	peak_10065	chr9	108463187	108464612	10.4289	+	108463187	108464612	0	1	1425	0	772	23727	927	19075	5.63819	4.36159	-1.17128	4.85111e-05	0.000725435	ENSMUST00000193170	Ccdc71	LastExon
17766	peak_17766	chr18	82914717	82956392	10.4284	+	82914717	82956392	0	2	6869	0,40806	919	6967	1187	7072	3.09118	2.0068	-1.0065	4.85663e-05	0.000725685	ENSMUST00000071233	Zfp516	UTR5
4068	peak_4068	chr4	122996433	122996708	10.4236	+	122996433	122996708	0	1	275	0	234	3504	266	2551	3.57271	2.23082	-1.22726	4.87963e-05	0.000728107	ENSMUST00000030407	Mycl	UTR5
9530	peak_9530	chr8	107044947	107046365	10.4236	-	107044947	107046365	0	2	148,77	0,1341	74	670	125	506	4.39184	2.7728	-1.46074	4.88442e-05	0.000728107	ENSMUST00000154271	Pdf	UTR3
13148	peak_13148	chr12	4850577	4851502	10.4236	+	4850577	4851502	0	1	925	0	136	3848	197	2783	6.04102	4.54957	-1.35248	4.88219e-05	0.000728107	ENSMUST00000220170	Wdcp	LastExon
10464	peak_10464	chr9	58198797	58199972	10.4219	-	58198797	58199972	0	1	1175	0	5779	43540	6020	40717	3.07284	2.18825	-0.8328	4.89573e-05	0.000728938	ENSMUST00000215950	Islr2	LastExon
14183	peak_14183	chr13	34127332	34127707	10.4219	-	34127332	34127707	0	1	375	0	13005	138444	13321	96927	4.32346	3.16044	-1.07426	4.89773e-05	0.000728938	ENSMUST00000075774	Tubb2b	UTR3
76	peak_76	chr1	36512741	36519064	10.416	+	36512741	36519064	0	2	412113	0,6210	344	8556	394	6038	4.58984	3.16184	-1.30774	4.9354e-05	0.000731947	ENSMUST00000097776	Cnnm3	Exon
4676	peak_4676	chr4	122946874	122947099	10.416	-	122946874	122947099	0	1	225	0	98	1888	116	853	5.51988	3.72548	-1.61459	4.92708e-05	0.000731947	ENSMUST00000030408	Mfsd2a	UTR3
5722	peak_5722	chr5	14520772	14521097	10.416	-	14520772	14521097	0	1	325	0	107	1473	187	1058	5.01828	3.41366	-1.44896	4.93836e-05	0.000731947	ENSMUST00000182496	Gm26918	UTR3
14148	peak_14148	chr13	17989314	17989639	10.416	-	17989314	17989639	0	1	325	0	218	5375	290	3002	5.8867	4.22556	-1.49859	4.92425e-05	0.000731947	ENSMUST00000222796	Yae1d1	UTR3
14438	peak_14438	chr13	95602703	95603103	10.416	-	95602703	95603103	0	1	400	0	676	4025	645	2489	3.78004	2.66585	-1.03269	4.94124e-05	0.000731947	ENSMUST00000059193	F2r	UTR3
16006	peak_16006	chr16	20692407	20692757	10.416	+	20692407	20692757	0	1	350	0	1281	24748	1229	15307	4.50446	3.15896	-1.23004	4.93796e-05	0.000731947	ENSMUST00000156226	Eif4g1	UTR3
3677	peak_3677	chr3	133082056	133082306	10.4154	-	133082056	133082306	0	1	250	0	221	1338	286	980	3.72344	2.30509	-1.29338	4.94715e-05	0.000732247	ENSMUST00000197381	Gstcd	UTR3
4389	peak_4389	chr4	34808187	34808562	10.4146	-	34808187	34808562	0	1	375	0	505	3861	639	2861	4.16566	3.07255	-1.01306	4.95377e-05	0.000732653	ENSMUST00000047950	Zfp292	LastExon
8752	peak_8752	chr8	45024306	45024931	10.4122	+	45024306	45024931	0	1	625	0	995	7999	1419	6225	4.23712	2.8485	-1.26754	4.96632e-05	0.000733875	ENSMUST00000215588	Fat1	Exon
17760	peak_17760	chr18	80117122	80118022	10.4122	+	80117122	80118022	0	1	900	0	539	10825	709	8043	5.41108	3.99131	-1.2947	4.96981e-05	0.000733875	ENSMUST00000070219	Pard6g	LastExon
6482	peak_6482	chr6	71978501	71978876	10.4116	+	71978501	71978876	0	1	375	0	179	1726	202	1069	3.82604	2.25382	-1.42248	4.97579e-05	0.000734182	ENSMUST00000055296	Polr1a	LastExon
14560	peak_14560	chr14	25665945	25666195	10.4108	+	25665945	25666195	0	1	250	0	640	3158	541	1590	3.52334	2.36823	-1.06679	4.98245e-05	0.00073459	ENSMUST00000162645	Zmiz1	UTR3
16923	peak_16923	chr17	88486676	88487126	10.4057	+	88486676	88487126	0	1	450	0	262	9985	290	5573	6.38023	4.86815	-1.36854	5.00395e-05	0.000737174	ENSMUST00000141052	Foxn2	UTR3
18451	peak_18451	chr19	4613626	4614526	10.4057	-	4613626	4614526	0	1	900	0	472	10693	511	9067	4.45848	3.36156	-1.01684	5.00779e-05	0.000737174	ENSMUST00000053597	Lrfn4	Exon
759	peak_759	chr1	82236600	82236650	10.3991	-	82236600	82236650	0	1	50	0	173	1034	178	459	3.81351	2.28501	-1.38722	5.0347e-05	0.000740556	ENSMUST00000069799	Irs1	UTR3
5510	peak_5510	chr5	129983023	129983948	10.3963	+	129983023	129983948	0	1	925	0	623	11466	690	7078	5.44733	4.18308	-1.16053	5.05359e-05	0.000742015	ENSMUST00000201855	Vkorc1l1	UTR3
10407	peak_10407	chr9	53160007	53204398	10.3963	-	53160007	53204398	0	2	10340	0,44051	484	6182	558	3889	4.89708	3.60738	-1.1827	5.05431e-05	0.000742015	ENSMUST00000065630	Ddx10	Exon
18228	peak_18228	chr19	21797930	21801888	10.3963	+	21797930	21801888	0	2	498,27	0,3931	1194	33074	1333	23252	5.92917	4.70603	-1.12818	5.05642e-05	0.000742015	ENSMUST00000238079	Cemip2	UTR5
6547	peak_6547	chr6	90381873	90382848	10.3941	+	90381873	90382848	0	1	975	0	291	9761	383	7285	6.25074	4.90126	-1.23285	5.06811e-05	0.000743151	ENSMUST00000203493	Zxdc	LastExon
1787	peak_1787	chr2	152893744	152894094	10.3917	+	152893744	152894094	0	1	350	0	467	7902	462	3942	5.35472	3.93256	-1.29453	5.08873e-05	0.000744383	ENSMUST00000028969	Tpx2	UTR3
11983	peak_11983	chr11	69048999	69050450	10.3917	+	69048999	69050450	0	2	76149	0,1302	261	1592	292	933	3.7841	2.30291	-1.34637	5.09089e-05	0.000744383	ENSMUST00000149018	Aurkb	UTR5
16195	peak_16195	chr16	91658889	91659989	10.3917	+	91658889	91659989	0	1	1100	0	5204	61747	5721	43079	4.82146	3.77647	-0.972085	5.09229e-05	0.000744383	ENSMUST00000114036	Son	Exon
16545	peak_16545	chr17	15375249	15375840	10.3917	+	15375249	15375840	0	2	116309	0,282	407	2968	449	2421	2.94953	1.75567	-1.10035	5.08124e-05	0.000744383	ENSMUST00000181251	A930024N18Rik	UTR5
2565	peak_2565	chr2	155403487	155406675	10.3862	-	155403487	155406675	0	2	741201	0,1987	1169	17656	1301	13611	5.10544	4.04686	-0.983681	5.12374e-05	0.000747214	ENSMUST00000109670	Ncoa6	Exon
5465	peak_5465	chr5	123371877	123372652	10.3862	+	123371877	123372652	0	1	775	0	1752	44909	1444	22690	5.4111	4.05777	-1.23443	5.12751e-05	0.000747214	ENSMUST00000031391	Bcl7a	UTR3
13761	peak_13761	chr12	103423982	103425535	10.3862	-	103423982	103425535	0	2	615,10	0,1543	2058	10990	2227	9251	3.4212	2.45073	-0.916468	5.12346e-05	0.000747214	ENSMUST00000220705	Ddx24	UTR3
16277	peak_16277	chr16	17153912	17154237	10.3862	-	17153912	17154237	0	1	325	0	374	4448	480	2867	4.8398	3.47366	-1.24697	5.12169e-05	0.000747214	ENSMUST00000232594	Ube2l3	UTR3
13215	peak_13215	chr12	53139510	53139835	10.3856	+	53139510	53139835	0	1	325	0	247	1955	315	1390	4.17114	2.84309	-1.2146	5.13368e-05	0.000747535	ENSMUST00000095737	Akap6	Exon
3667	peak_3667	chr3	127808288	127808463	10.3816	-	127808288	127808463	0	1	175	0	292	1292	304	763	3.39637	2.14	-1.15378	5.15963e-05	0.000749592	ENSMUST00000198626	Ap1ar	UTR3
10106	peak_10106	chr9	110550511	110553169	10.3816	+	110550511	110553169	0	2	983,67	0,2591	2641	41487	2925	28907	5.21878	4.16599	-0.97865	5.1637e-05	0.000749592	ENSMUST00000196814	Setd2	Exon
14010	peak_14010	chr13	66997177	66997427	10.3816	+	66997177	66997427	0	1	250	0	203	1186	265	801	3.76157	2.31836	-1.3145	5.16046e-05	0.000749592	ENSMUST00000224244	Ptdss1	UTR3
16463	peak_16463	chr16	91615606	91615956	10.3816	-	91615606	91615956	0	1	350	0	47	2072	65	1113	6.6632	4.78213	-1.68194	5.15312e-05	0.000749592	ENSMUST00000169982	Dnajc28	UTR3
10749	peak_10749	chr9	122861767	122862128	10.3816	-	122861767	122862128	0	1	361	0	755	8629	789	5587	4.33837	2.99436	-1.22825	5.16778e-05	0.000749607	ENSMUST00000214558	Zfp445	LastExon
12355	peak_12355	chr11	115488998	115489848	10.3815	+	115488998	115489848	0	1	850	0	66	2497	114	2306	6.08745	4.52286	-1.41359	5.17575e-05	0.00074966	ENSMUST00000035240	Armc7	LastExon
12908	peak_12908	chr11	98325964	98326564	10.3815	-	98325964	98326564	0	1	600	0	1884	25913	1689	11271	4.89697	3.31332	-1.43129	5.1761e-05	0.00074966	ENSMUST00000041685	Neurod2	UTR3
5250	peak_5250	chr5	92054500	92055050	10.3784	+	92054500	92055050	0	1	550	0	1739	13339	1756	7770	4.15814	3.08457	-0.996599	5.19129e-05	0.000751283	ENSMUST00000202258	G3bp2	UTR3
3639	peak_3639	chr3	121158683	121159033	10.3756	-	121158683	121159033	0	1	350	0	217	6348	249	3403	6.10304	4.62944	-1.33783	5.20516e-05	0.000752712	ENSMUST00000106465	Rwdd3	UTR3
2003	peak_2003	chr2	18045191	18046841	10.3752	-	18045191	18046841	0	1	1650	0	1307	48696	1361	31719	6.47495	5.40917	-0.989668	5.21452e-05	0.000752911	ENSMUST00000066885	Skida1	UTR3
4137	peak_4137	chr4	129218989	129219339	10.3752	+	129218989	129219339	0	1	350	0	337	6002	366	4116	5.15409	3.88924	-1.16123	5.21245e-05	0.000752911	ENSMUST00000106054	Yars	UTR3
10086	peak_10086	chr9	109100477	109100652	10.3749	+	109100477	109100652	0	1	175	0	215	1464	226	977	2.85651	1.47065	-1.26403	5.21973e-05	0.000753087	ENSMUST00000072093	Plxnb1	Exon
4258	peak_4258	chr4	147945169	147946983	10.3748	+	147945169	147946983	0	2	292383	0,1431	281	3904	415	4060	4.70954	3.55832	-1.06365	5.22394e-05	0.000753118	ENSMUST00000103232	2510039O18Rik	LastExon
7024	peak_7024	chr6	112722420	112723145	10.3672	-	112722420	112723145	0	1	725	0	1819	13175	1658	8473	3.66183	2.49388	-1.07984	5.25647e-05	0.000757103	ENSMUST00000113169	Srgap3	UTR3
9507	peak_9507	chr8	104354715	104354865	10.3672	-	104354715	104354865	0	1	150	0	104	837	118	357	3.9075	1.85667	-1.82429	5.25961e-05	0.000757103	ENSMUST00000179802	Cmtm4	UTR3
12764	peak_12764	chr11	76257922	76258722	10.3598	-	76257922	76258722	0	1	800	0	655	6618	1054	6639	4.29268	3.00109	-1.18293	5.29475e-05	0.000760999	ENSMUST00000021204	Nxn	UTR3
14960	peak_14960	chr14	52236948	52237791	10.3598	-	52236948	52237791	0	2	624,50	0,793	665	10153	717	7810	4.97872	3.87395	-1.02245	5.29323e-05	0.000760999	ENSMUST00000089752	Chd8	Exon
6035	peak_6035	chr5	115147480	115147580	10.3582	-	115147480	115147580	0	1	100	0	297	1079	404	692	3.08593	1.50671	-1.42741	5.30466e-05	0.000761843	ENSMUST00000112121	Mlec	UTR3
4390	peak_4390	chr4	34808587	34808962	10.3538	-	34808587	34808962	0	1	375	0	675	4532	828	3071	3.99843	2.68902	-1.21007	5.33357e-05	0.000764175	ENSMUST00000047950	Zfp292	LastExon
9409	peak_9409	chr8	79356327	79399254	10.3538	-	79356327	79399254	0	3	142,581,2	0,15456,42925	1030	12967	1163	10469	4.08481	2.89768	-1.09458	5.33711e-05	0.000764175	ENSMUST00000066081	Smad1	UTR3
10282	peak_10282	chr9	22113313	22113513	10.3538	-	22113313	22113513	0	1	200	0	510	6271	558	4411	3.99856	2.66661	-1.2189	5.33242e-05	0.000764175	ENSMUST00000216837	Elof1	UTR3
14396	peak_14396	chr13	78189122	78189847	10.3538	-	78189122	78189847	0	1	725	0	2909	147198	3386	83481	6.88829	5.57083	-1.2043	5.3312e-05	0.000764175	ENSMUST00000150498	Nr2f1	UTR3
4585	peak_4585	chr4	107247492	107247667	10.3518	-	107247492	107247667	0	1	175	0	239	857	310	625	2.91307	1.47358	-1.30875	5.34873e-05	0.000765258	ENSMUST00000156771	Lrrc42	LastExon
4209	peak_4209	chr4	138241875	138242100	10.3482	+	138241875	138242100	0	1	225	0	446	4148	481	2434	4.40507	3.04146	-1.24447	5.37001e-05	0.000767138	ENSMUST00000165861	Hp1bp3	UTR3
5326	peak_5326	chr5	108706319	108706494	10.3482	+	108706319	108706494	0	1	175	0	240	1272	321	783	3.64906	2.01894	-1.46954	5.36979e-05	0.000767138	ENSMUST00000013633	Fgfrl1	LastExon
9558	peak_9558	chr8	111710484	111711259	10.3478	-	111710484	111711259	0	1	775	0	728	11174	760	8551	4.56334	3.43573	-1.04512	5.37576e-05	0.000767378	ENSMUST00000212349	Bcar1	UTR3
2881	peak_2881	chr3	51249836	51250761	10.3475	+	51249836	51250761	0	1	925	0	393	8519	457	5943	5.51478	4.1903	-1.21075	5.38089e-05	0.00076753	ENSMUST00000144826	Noct	LastExon
7354	peak_7354	chr7	25364158	25364958	10.3467	+	25364158	25364958	0	1	800	0	645	7291	726	5746	3.8265	2.62175	-1.11223	5.39587e-05	0.000767929	ENSMUST00000153077	Megf8	UTR5
15364	peak_15364	chr15	88779752	88780052	10.3467	+	88779752	88780052	0	1	300	0	211	2384	288	1715	4.73058	3.33386	-1.27118	5.39591e-05	0.000767929	ENSMUST00000041297	Zbed4	LastExon
15740	peak_15740	chr15	82856161	82857236	10.3467	-	82856161	82857236	0	1	1075	0	3657	27228	4038	23541	3.76818	2.75603	-0.943259	5.39249e-05	0.000767929	ENSMUST00000109510	Tcf20	Exon
9608	peak_9608	chr8	121797786	121797961	10.3458	-	121797786	121797961	0	1	175	0	263	2165	295	1445	3.5568	2.09811	-1.32464	5.40542e-05	0.000768408	ENSMUST00000174665	Klhdc4	UTR3
18725	peak_18725	chrX	48266421	48267046	10.3458	+	48266421	48267046	0	1	625	0	119	1748	143	983	5.12183	3.6436	-1.34176	5.40742e-05	0.000768408	ENSMUST00000125966	Utp14a	UTR5
6444	peak_6444	chr6	50198180	50198505	10.3389	+	50198180	50198505	0	1	325	0	374	4556	469	2532	4.83438	3.37322	-1.3299	5.43744e-05	0.000772091	ENSMUST00000036225	Mpp6	LastExon
12043	peak_12043	chr11	74817558	74817783	10.3387	+	74817558	74817783	0	1	225	0	227	1550	271	844	3.99361	2.34277	-1.48695	5.44249e-05	0.000772228	ENSMUST00000092912	Mettl16	UTR3
1086	peak_1086	chr1	172004459	172004784	10.3376	-	172004459	172004784	0	1	325	0	664	10063	583	4734	5.04037	3.59031	-1.31801	5.45051e-05	0.000772784	ENSMUST00000111264	Vangl2	UTR3
2088	peak_2088	chr2	26891708	26892583	10.3338	-	26891708	26892583	0	1	875	0	359	5455	420	3871	4.4715	3.06004	-1.28667	5.46967e-05	0.000774838	ENSMUST00000047632	Surf6	UTR3
7760	peak_7760	chr7	121076262	121076462	10.3338	+	121076262	121076462	0	1	200	0	691	3264	709	1818	3.46541	2.19123	-1.16806	5.47732e-05	0.000774838	ENSMUST00000207835	Mettl9	UTR5
14949	peak_14949	chr14	50926394	50926619	10.3338	-	50926394	50926619	0	1	225	0	320	2080	423	1258	3.95287	2.44473	-1.36558	5.4737e-05	0.000774838	ENSMUST00000160835	Pip4p1	UTR3
9097	peak_9097	chr8	120570876	120572315	10.331	+	120570876	120572315	0	2	463,12	0,1427	847	11833	741	8092	3.88165	2.79326	-1.00889	5.49202e-05	0.000776334	ENSMUST00000118136	Gse1	Exon
11197	peak_11197	chr10	120231204	120231579	10.3309	+	120231204	120231579	0	1	375	0	580	6697	695	4662	4.76065	3.51993	-1.13933	5.49663e-05	0.000776405	ENSMUST00000220107	Llph	UTR3
5108	peak_5108	chr5	33026792	33027342	10.3302	+	33026792	33027342	0	1	550	0	1216	8595	1704	7948	4.00443	2.8912	-1.03327	5.50738e-05	0.000776759	ENSMUST00000019109	Ywhah	LastExon
15990	peak_15990	chr16	18406201	18406451	10.3302	+	18406201	18406451	0	1	250	0	170	1342	214	853	4.10182	2.55828	-1.40001	5.50645e-05	0.000776759	ENSMUST00000232025	Arvcf	UTR3
5777	peak_5777	chr5	31522593	31522968	10.3296	-	31522593	31522968	0	1	375	0	153	1804	228	1500	4.48578	3.02257	-1.32803	5.51378e-05	0.000777081	ENSMUST00000202932	Supt7l	UTR3
9143	peak_9143	chr8	123268015	123268415	10.3265	+	123268015	123268415	0	1	400	0	136	3776	184	2657	5.6782	4.09641	-1.42843	5.52983e-05	0.00077876	ENSMUST00000156896	Zfp276	UTR5
18108	peak_18108	chr19	5426434	5427309	10.3133	+	5426434	5427309	0	1	875	0	320	6776	474	6719	4.88634	3.63373	-1.14901	5.58504e-05	0.000785949	ENSMUST00000054477	AI837181	UTR3
11664	peak_11664	chr10	127055510	127055685	10.3107	-	127055510	127055685	0	1	175	0	188	972	216	646	3.51769	2.16251	-1.2358	5.59912e-05	0.000787342	ENSMUST00000040307	March9	UTR3
10701	peak_10701	chr9	109057932	109058057	10.3097	-	109057932	109058057	0	1	125	0	47	811	99	704	4.74325	2.79992	-1.72986	5.62385e-05	0.000787882	ENSMUST00000112053	Trex1	UTR3
11302	peak_11302	chr10	29346652	29347652	10.3097	-	29346652	29347652	0	1	1000	0	1590	46940	1986	34817	6.12091	4.94445	-1.084	5.61669e-05	0.000787882	ENSMUST00000162335	Rnf146	UTR3
11319	peak_11319	chr10	37135824	37136599	10.3097	-	37135824	37136599	0	1	775	0	18794	194347	19674	147964	3.5766	2.39205	-1.09136	5.62193e-05	0.000787882	ENSMUST00000092584	Marcks	UTR3
16176	peak_16176	chr16	90496169	90497469	10.3097	+	90496169	90497469	0	1	1300	0	978	29806	995	21007	5.75815	4.56991	-1.09367	5.61962e-05	0.000787882	ENSMUST00000231719	Hunk	LastExon
16948	peak_16948	chr17	12264105	12271519	10.3097	-	12264105	12271519	0	2	43657	0,6757	687	9923	785	8736	4.43575	3.35575	-1.00398	5.61431e-05	0.000787882	ENSMUST00000232931	Map3k4	UTR3
9637	peak_9637	chr8	124370173	124370623	10.3021	-	124370173	124370623	0	1	450	0	92	1205	114	857	4.29619	2.78421	-1.37025	5.66237e-05	0.000792051	ENSMUST00000136892	Pgbd5	UTR3
11383	peak_11383	chr10	62582172	62582472	10.3021	-	62582172	62582472	0	1	300	0	674	5167	668	3051	4.01934	2.65825	-1.24129	5.65917e-05	0.000792051	ENSMUST00000045866	Ddx21	UTR3
16389	peak_16389	chr16	46448293	46448843	10.3021	-	46448293	46448843	0	1	550	0	298	17353	386	10853	7.10382	5.75351	-1.23416	5.66621e-05	0.000792051	ENSMUST00000023334	Nectin3	UTR3
2192	peak_2192	chr2	52401900	52402425	10.2962	-	52401900	52402425	0	1	525	0	418	21821	475	13697	6.89254	5.81523	-0.998732	5.6938e-05	0.000795318	ENSMUST00000036541	Arl5a	UTR3
16129	peak_16129	chr16	44220215	44222065	10.2953	+	44220215	44222065	0	1	1850	0	706	17804	729	10722	5.88848	4.66959	-1.12325	5.70161e-05	0.00079582	ENSMUST00000169582	Usf3	LastExon
6667	peak_6667	chr6	125130097	125130497	10.2918	+	125130097	125130497	0	1	400	0	887	6572	822	4491	3.9189	2.88025	-0.960712	5.72456e-05	0.000797731	ENSMUST00000112390	Chd4	UTR3
11700	peak_11700	chr11	3308004	3308654	10.2918	+	3308004	3308654	0	1	650	0	888	10407	935	6172	4.71198	3.37976	-1.21874	5.72116e-05	0.000797731	ENSMUST00000093402	Patz1	UTR3
12064	peak_12064	chr11	75705553	75705878	10.2918	+	75705553	75705878	0	1	325	0	375	8917	504	5984	5.59705	4.53114	-0.991188	5.72799e-05	0.000797731	ENSMUST00000108425	Crk	UTR3
14709	peak_14709	chr14	59629814	59630539	10.2838	+	59629814	59630539	0	1	725	0	1257	58924	1349	38949	6.4171	5.04312	-1.25137	5.76395e-05	0.000802147	ENSMUST00000053949	Shisa2	LastExon
11938	peak_11938	chr11	60783960	60785185	10.2833	+	60783960	60785185	0	1	1225	0	307	7589	415	5965	5.48795	4.06138	-1.29544	5.77467e-05	0.000802454	ENSMUST00000056907	Smcr8	LastExon
16617	peak_16617	chr17	25184839	25185689	10.2833	+	25184839	25185689	0	1	850	0	468	14925	538	10343	6.13564	4.84111	-1.18627	5.77054e-05	0.000802454	ENSMUST00000232784	BC003965	UTR5
8947	peak_8947	chr8	93956702	93957027	10.2812	+	93956702	93957027	0	1	325	0	554	3693	495	2321	3.39719	2.22026	-1.08457	5.78739e-05	0.000803629	ENSMUST00000138659	Gnao1	UTR3
1226	peak_1226	chr2	14985704	14986104	10.2794	+	14985704	14986104	0	1	400	0	105	4480	139	2763	6.50573	4.80897	-1.52219	5.80293e-05	0.000804602	ENSMUST00000193452	Cacnb2	UTR5
8190	peak_8190	chr7	45710391	45711616	10.2794	-	45710391	45711616	0	1	1225	0	427	6446	505	5142	4.19064	2.89116	-1.1905	5.80147e-05	0.000804602	ENSMUST00000072836	Sphk2	UTR3
2242	peak_2242	chr2	72946647	72970538	10.2771	-	72946647	72970538	0	2	91384	0,23507	1304	16696	1457	11183	4.93476	3.7717	-1.08519	5.81665e-05	0.000805911	ENSMUST00000141372	Sp3	UTR3
13171	peak_13171	chr12	24958999	24959399	10.2769	+	24958999	24959399	0	1	400	0	248	9360	343	6593	6.42773	4.95281	-1.33561	5.82183e-05	0.000806037	ENSMUST00000222994	Mboat2	UTR3
11863	peak_11863	chr11	55499849	55500249	10.2736	+	55499849	55500249	0	1	400	0	943	12475	942	6880	4.97436	3.75046	-1.12471	5.83951e-05	0.000807892	ENSMUST00000018727	G3bp1	UTR3
2402	peak_2402	chr2	121235579	121236729	10.2714	-	121235579	121236729	0	1	1150	0	4105	33873	3887	23076	4.2106	3.18725	-0.952259	5.85238e-05	0.000809078	ENSMUST00000131245	Trp53bp1	Exon
6107	peak_6107	chr5	124315372	124315647	10.2656	-	124315372	124315647	0	1	275	0	204	2238	226	1351	4.53	3.05884	-1.33882	5.88037e-05	0.000812352	ENSMUST00000156013	Mphosph9	UTR3
483	peak_483	chr1	178249420	178249620	10.2611	+	178249420	178249620	0	1	200	0	94	1055	150	667	4.7123	3.02001	-1.51798	5.90299e-05	0.00081488	ENSMUST00000027783	Desi2	LastExon
10244	peak_10244	chr9	15998554	15999079	10.2594	-	15998554	15999079	0	1	525	0	585	7263	579	4250	4.8685	3.70373	-1.07398	5.91463e-05	0.000815856	ENSMUST00000082170	Fat3	Exon
13314	peak_13314	chr12	82341829	82342404	10.2594	+	82341829	82342404	0	1	575	0	928	11209	909	6395	4.69953	3.36964	-1.21532	5.92553e-05	0.000815856	ENSMUST00000053969	Sipa1l1	Exon
17452	peak_17452	chr18	32079773	32083286	10.2594	+	32079773	32083286	0	2	804,21	0,3492	1723	24076	1725	16192	4.84075	3.6867	-1.06589	5.92736e-05	0.000815856	ENSMUST00000212115	Iws1	UTR5
18601	peak_18601	chr19	43736378	43736778	10.2594	-	43736378	43736778	0	1	400	0	90	3462	102	1839	6.48425	4.90581	-1.42538	5.925e-05	0.000815856	ENSMUST00000045562	Cox15	UTR3
9149	peak_9149	chr8	123461632	123462132	10.2583	+	123461632	123462132	0	1	500	0	164	2755	187	1552	4.82001	3.15657	-1.49552	5.93663e-05	0.000816459	ENSMUST00000108830	Def8	UTR3
12436	peak_12436	chr11	3307700	3330949	10.2583	-	3307700	3330949	0	2	414,36	0,23213	716	9809	708	5245	4.62439	3.10358	-1.37643	5.9404e-05	0.000816459	ENSMUST00000155332	Gm12592	UTR3
3457	peak_3457	chr3	88201251	88201426	10.253	-	88201251	88201426	0	1	175	0	100	1353	104	443	4.92709	2.73151	-1.94254	5.96668e-05	0.000819473	ENSMUST00000181021	AI849053	UTR3
4210	peak_4210	chr4	138439065	138439590	10.2519	+	138439065	138439590	0	1	525	0	163	2430	244	1891	4.12651	2.4685	-1.49089	5.97568e-05	0.000820112	ENSMUST00000105813	Mul1	LastExon
4854	peak_4854	chr4	141473266	141474741	10.2476	-	141473266	141474741	0	1	1475	0	1935	20313	1953	18675	3.69589	2.84262	-0.804054	5.99774e-05	0.000822541	ENSMUST00000105786	Spen	Exon
5615	peak_5615	chr5	140754596	140761192	10.2395	+	140754596	140761192	0	3	95132398	0,5976,6198	406	12225	526	10534	6.00182	4.85705	-1.05761	6.03594e-05	0.000827178	ENSMUST00000176035	Amz1	UTR3
18130	peak_18130	chr19	6375869	6376519	10.2385	+	6375869	6376519	0	1	650	0	2344	19099	2090	12863	3.70111	2.61332	-1.00752	6.0445e-05	0.000827749	ENSMUST00000113485	Sf1	UTR3
7987	peak_7987	chr7	16564158	16614475	10.2374	-	16564158	16614475	0	2	1171,4	0,50313	2608	49756	2832	38323	5.3544	4.28611	-0.990581	6.0553e-05	0.000828418	ENSMUST00000171937	Arhgap35	Exon
15402	peak_15402	chr15	98643460	98643685	10.2374	+	98643460	98643685	0	1	225	0	356	2565	366	1662	2.77627	1.37484	-1.27716	6.05817e-05	0.000828418	ENSMUST00000230064	Cacnb3	UTR5
6651	peak_6651	chr6	120762167	120762442	10.2342	+	120762167	120762442	0	1	275	0	243	1649	239	925	3.7591	2.33127	-1.29721	6.07572e-05	0.000830216	ENSMUST00000100993	Cecr2	Exon
5230	peak_5230	chr5	76871502	76871852	10.2318	+	76871502	76871852	0	1	350	0	737	4563	763	3027	3.86314	2.85804	-0.934552	6.09893e-05	0.000831593	ENSMUST00000163347	C530008M17Rik	UTR3
6315	peak_6315	chr6	4905263	4905713	10.2318	+	4905263	4905713	0	1	450	0	721	5329	836	3815	4.10164	2.92585	-1.08264	6.09832e-05	0.000831593	ENSMUST00000177456	Ppp1r9a	UTR5
7598	peak_7598	chr7	79696749	79697224	10.2318	+	79696749	79697224	0	1	475	0	224	3455	260	1929	5.16256	3.58649	-1.42417	6.09902e-05	0.000831593	ENSMUST00000206622	Ticrr	UTR3
18521	peak_18521	chr19	10247539	10248264	10.2295	-	10247539	10248264	0	1	725	0	75	3333	123	2983	5.53824	3.93932	-1.44068	6.11332e-05	0.000832939	ENSMUST00000125567	Dagla	UTR3
8710	peak_8710	chr8	26978707	26979407	10.2267	+	26978707	26979407	0	1	700	0	677	18975	705	14331	4.39596	3.24028	-1.06544	6.13205e-05	0.000834557	ENSMUST00000154256	Zfp703	LastExon
14881	peak_14881	chr14	20549836	20550011	10.2267	-	20549836	20550011	0	1	175	0	78	491	105	329	3.61046	1.97282	-1.47304	6.13404e-05	0.000834557	ENSMUST00000035340	Usp54	UTR3
12468	peak_12468	chr11	5531136	5531386	10.2262	-	5531136	5531386	0	1	250	0	245	1949	286	1053	4.13679	2.47561	-1.49268	6.1408e-05	0.000834875	ENSMUST00000020776	Ccdc117	UTR3
9247	peak_9247	chr8	25767362	25768337	10.223	-	25767362	25768337	0	1	975	0	669	20168	668	11531	6.16238	4.98202	-1.08582	6.16312e-05	0.000836702	ENSMUST00000038498	Bag4	UTR3
12094	peak_12094	chr11	78029580	78029980	10.223	+	78029580	78029980	0	1	400	0	360	6034	414	4189	5.24177	4.00124	-1.13662	6.15933e-05	0.000836702	ENSMUST00000049167	Phf12	LastExon
9350	peak_9350	chr8	70107473	70107623	10.2226	-	70107473	70107623	0	1	150	0	522	2546	415	1313	2.58741	1.24719	-1.22261	6.16907e-05	0.000836908	ENSMUST00000002412	Ncan	Exon
4831	peak_4831	chr4	139102038	139102338	10.2184	-	139102038	139102338	0	1	300	0	23	1079	44	607	6.75642	4.4866	-2.00123	6.19863e-05	0.000839358	ENSMUST00000143971	Minos1	UTR3
10979	peak_10979	chr10	75061770	75062270	10.2184	+	75061770	75062270	0	1	500	0	700	6033	771	4588	3.27279	2.02181	-1.147	6.20049e-05	0.000839358	ENSMUST00000164107	Bcr	Exon
13763	peak_13763	chr12	104691366	104691591	10.2184	-	104691366	104691591	0	1	225	0	410	4402	504	3094	4.66794	3.45381	-1.11504	6.19833e-05	0.000839358	ENSMUST00000222115	Dicer1	UTR3
10226	peak_10226	chr9	15006085	15007553	10.2144	-	15006085	15007553	0	2	132193	0,1275	255	2318	289	1469	4.39535	3.09314	-1.18987	6.22236e-05	0.000841714	ENSMUST00000056755	Panx1	UTR3
15779	peak_15779	chr15	86030227	86031552	10.2122	-	86030227	86031552	0	1	1325	0	3199	59805	2287	31291	4.67708	3.51431	-1.07142	6.23638e-05	0.000843006	ENSMUST00000016172	Celsr1	Exon
15605	peak_15605	chr15	73105318	73105743	10.2119	-	73105318	73105743	0	1	425	0	370	4784	434	3073	4.36169	2.81633	-1.39571	6.2422e-05	0.000843189	ENSMUST00000044113	Ago2	UTR3
5949	peak_5949	chr5	100796536	100796986	10.2108	-	100796536	100796986	0	1	450	0	225	1845	245	1079	4.21992	2.79157	-1.29891	6.2601e-05	0.000843793	ENSMUST00000151201	Helq	Exon
6834	peak_6834	chr6	38747901	38817985	10.2108	-	38747901	38817985	0	2	96,79	0,70005	200	1106	253	631	3.69766	2.223	-1.33615	6.25536e-05	0.000843793	ENSMUST00000159894	Hipk2	UTR3
6984	peak_6984	chr6	89356950	89362488	10.2108	-	89356950	89362488	0	2	768,82	0,5456	961	12989	1051	11916	3.91544	2.92114	-0.926552	6.259e-05	0.000843793	ENSMUST00000049845	Plxna1	Exon
2975	peak_2975	chr3	88351159	88352990	10.2103	+	88351159	88352990	0	2	422,28	0,1803	626	6604	612	4824	3.82677	2.69373	-1.04579	6.27147e-05	0.000844119	ENSMUST00000192057	Smg5	UTR5
14234	peak_14234	chr13	48489871	48490496	10.2103	-	48489871	48490496	0	1	625	0	255	4691	288	2929	4.91509	3.41713	-1.35566	6.26947e-05	0.000844119	ENSMUST00000110110	Zfp169	LastExon
13122	peak_13122	chr11	120629197	120629397	10.2102	-	120629197	120629397	0	1	200	0	295	1838	284	1212	2.67052	1.39953	-1.16361	6.27639e-05	0.000844178	ENSMUST00000106180	Mafg	UTR3
18445	peak_18445	chr19	4324477	4324852	10.2065	-	4324477	4324852	0	1	375	0	781	4702	761	3340	2.67534	1.51103	-1.07271	6.29685e-05	0.000846327	ENSMUST00000237268	Kdm2a	UTR3
2694	peak_2694	chr2	168181685	168182960	10.2063	-	168181685	168182960	0	1	1275	0	4370	95991	4601	62960	5.68973	4.56636	-1.03745	6.30977e-05	0.000846462	ENSMUST00000088001	Adnp	UTR3
5259	peak_5259	chr5	92950763	92952581	10.2063	+	92950763	92952581	0	2	557,43	0,1775	307	4584	452	4379	4.13307	2.75274	-1.2592	6.31132e-05	0.000846462	ENSMUST00000113051	Shroom3	Exon
11326	peak_11326	chr10	40249202	40249652	10.2063	-	40249202	40249652	0	1	450	0	677	3597	762	2374	3.62868	2.37168	-1.15166	6.31074e-05	0.000846462	ENSMUST00000019982	Gtf3c6	UTR3
9776	peak_9776	chr9	43803625	43804300	10.2057	+	43803625	43804300	0	1	675	0	446	9405	670	9732	4.8142	3.56445	-1.14793	6.3183e-05	0.000846796	ENSMUST00000034510	Nectin1	LastExon
17973	peak_17973	chr18	61715614	61716039	10.205	-	61715614	61716039	0	1	425	0	207	3917	249	2588	5.37931	3.95129	-1.29675	6.32569e-05	0.000847184	ENSMUST00000238010	Grpel2	UTR3
7759	peak_7759	chr7	120944645	120945798	10.2033	+	120944645	120945798	0	2	27323	0,830	126	1374	217	1001	4.64998	2.9181	-1.55158	6.33801e-05	0.000848232	ENSMUST00000033173	Polr3e	LastExon
14511	peak_14511	chr13	115088956	115089588	10.1994	-	115088956	115089588	0	2	5395	0,237	351	2358	509	1960	3.26531	1.76605	-1.35756	6.35942e-05	0.000850494	ENSMUST00000109226	Pelo	Exon
11676	peak_11676	chr10	127526422	127526797	10.1964	-	127526422	127526797	0	1	375	0	250	3853	252	2412	3.82737	2.42071	-1.2788	6.37733e-05	0.000852284	ENSMUST00000095266	Nxph4	LastExon
4122	peak_4122	chr4	127247087	127247562	10.1952	+	127247087	127247562	0	1	475	0	184	2210	238	1426	4.19697	2.50554	-1.51752	6.3963e-05	0.000853006	ENSMUST00000142029	Smim12	LastExon
11970	peak_11970	chr11	65828218	65828918	10.1952	+	65828218	65828918	0	1	700	0	251	10112	309	6788	6.44538	5.00796	-1.3035	6.39064e-05	0.000853006	ENSMUST00000018491	Zkscan6	LastExon
18740	peak_18740	chrX	53608591	53609132	10.1952	+	53608591	53609132	0	1	541	0	73	1686	174	2087	5.40475	3.84277	-1.41652	6.39334e-05	0.000853006	ENSMUST00000123034	Gm14597	Intron
14515	peak_14515	chr13	118380284	118380534	10.1892	-	118380284	118380534	0	1	250	0	286	2691	326	1365	4.44185	3.02612	-1.29081	6.4319e-05	0.000856542	ENSMUST00000022245	Mrps30	UTR3
18229	peak_18229	chr19	21856285	21856560	10.1892	+	21856285	21856560	0	1	275	0	402	3586	430	2187	4.36382	3.04706	-1.2022	6.42927e-05	0.000856542	ENSMUST00000025663	Cemip2	LastExon
7296	peak_7296	chr7	19080343	19081935	10.1892	+	19080343	19081935	0	2	958,17	0,1575	1322	12199	1382	9870	3.32146	2.23027	-1.00791	6.44073e-05	0.000856546	ENSMUST00000146429	Dmwd	UTR5
7826	peak_7826	chr7	127795937	127797162	10.1892	+	127795937	127797162	0	2	761,89	0,1136	1164	9241	1281	8277	3.40927	2.3912	-0.946919	6.44101e-05	0.000856546	ENSMUST00000154987	Gm49388	Exon
7739	peak_7739	chr7	112110071	112110771	10.1837	+	112110071	112110771	0	1	700	0	1248	19578	1294	12029	5.20571	3.98259	-1.12226	6.47001e-05	0.000859796	ENSMUST00000210309	Usp47	LastExon
957	peak_957	chr1	143766768	143770908	10.1808	-	143766768	143770908	0	2	42483	0,3657	752	9518	782	6197	4.78283	3.53611	-1.14316	6.48758e-05	0.000861523	ENSMUST00000018343	Trove2	UTR3
13887	peak_13887	chr13	34901462	34901812	10.1803	+	34901462	34901812	0	1	350	0	488	10424	547	5898	5.52903	4.39207	-1.04865	6.4943e-05	0.000861809	ENSMUST00000220965	Prpf4b	UTR3
9935	peak_9935	chr9	72618710	72618935	10.1749	+	72618710	72618935	0	1	225	0	383	2487	461	1715	3.91396	2.62861	-1.17508	6.52323e-05	0.000865039	ENSMUST00000184373	Gm27232	UTR3
17840	peak_17840	chr18	31781225	31782225	10.1733	-	31781225	31782225	0	1	1000	0	659	7552	758	4842	4.75344	3.46529	-1.17718	6.53527e-05	0.000866026	ENSMUST00000180550	Gm26533	UTR3
346	peak_346	chr1	132938485	132939160	10.1721	+	132938485	132939160	0	1	675	0	158	5792	288	6114	5.23169	3.71759	-1.36724	6.54518e-05	0.000866731	ENSMUST00000027706	Lrrn2	LastExon
19040	peak_19040	chrX	73795483	73795908	10.1694	-	73795483	73795908	0	1	425	0	676	4847	684	3472	3.4473	2.26006	-1.09214	6.56236e-05	0.000868396	ENSMUST00000114438	Pdzd4	LastExon
377	peak_377	chr1	136468157	136469157	10.1688	+	136468157	136469157	0	2	612238	0,762	587	10710	634	6643	5.38325	4.0283	-1.23368	6.57862e-05	0.000868719	ENSMUST00000187963	Kif14	UTR5
2540	peak_2540	chr2	152394810	152395035	10.1688	-	152394810	152395035	0	1	225	0	145	1484	189	931	4.48203	2.92633	-1.40767	6.57269e-05	0.000868719	ENSMUST00000063332	Sox12	UTR3
5733	peak_5733	chr5	21670576	21675952	10.1688	-	21670576	21675952	0	2	27498	0,4878	196	2962	214	1752	4.60789	3.03179	-1.41999	6.57437e-05	0.000868719	ENSMUST00000060899	Napepld	Exon
8951	peak_8951	chr8	94673212	94673387	10.1636	+	94673212	94673387	0	1	175	0	362	1363	368	1007	2.66864	1.53444	-1.04632	6.60984e-05	0.000871856	ENSMUST00000034228	Arl2bp	UTR3
9817	peak_9817	chr9	52115622	52115739	10.1636	+	52115622	52115739	0	1	117	0	81	1720	113	1199	5.11364	3.42996	-1.5107	6.61163e-05	0.000871856	ENSMUST00000184156	Mir6244	UTR5
7567	peak_7567	chr7	68226091	68226780	10.1596	+	68226091	68226780	0	1	689	0	959	29722	1032	22563	5.56373	4.3628	-1.10406	6.63641e-05	0.000874315	ENSMUST00000005671	Igf1r	LastExon
8175	peak_8175	chr7	45046211	45049335	10.1596	-	45046211	45049335	0	2	1782497	0,627	3767	72256	4341	71387	4.21943	3.26898	-0.888171	6.63954e-05	0.000874315	ENSMUST00000057293	Prr12	Exon
9992	peak_9992	chr9	96052653	96052803	10.1575	+	96052653	96052803	0	1	150	0	109	675	122	352	3.83518	2.29015	-1.39347	6.65378e-05	0.000875578	ENSMUST00000187175	Xrn1	UTR5
14931	peak_14931	chr14	36938704	36940210	10.1571	-	36938704	36940210	0	2	76399	0,1107	375	4007	389	2594	4.6553	3.56171	-1.01185	6.66027e-05	0.00087582	ENSMUST00000090024	Ccser2	Exon
1274	peak_1274	chr2	26458534	26459034	10.1559	+	26458534	26459034	0	1	500	0	880	20958	822	13414	5.41572	4.2203	-1.10068	6.67055e-05	0.000876561	ENSMUST00000028288	Notch1	UTR3
12632	peak_12632	chr11	60740057	60741946	10.1541	-	60740057	60741946	0	2	644,56	0,1833	143	4052	170	2596	5.72677	4.17272	-1.40044	6.68811e-05	0.000877645	ENSMUST00000117743	Top3a	UTR3
14874	peak_14874	chr14	20077045	20077520	10.1541	-	20077045	20077520	0	1	475	0	98	1495	143	1086	5.10323	3.54592	-1.40435	6.68772e-05	0.000877645	ENSMUST00000059666	Saysd1	UTR3
6653	peak_6653	chr6	120886809	120887184	10.1539	+	120886809	120887184	0	1	375	0	838	6111	883	4094	3.18477	1.81705	-1.24669	6.70751e-05	0.000877749	ENSMUST00000009256	Bcl2l13	LastExon
13124	peak_13124	chr11	120806989	120807214	10.1539	-	120806989	120807214	0	1	225	0	413	3047	383	1537	3.93641	2.47792	-1.32138	6.69508e-05	0.000877749	ENSMUST00000055655	Fasn	UTR3
14361	peak_14361	chr13	67705905	67706855	10.1539	-	67705905	67706855	0	1	950	0	219	5627	292	3500	5.89375	4.53404	-1.2418	6.70402e-05	0.000877749	ENSMUST00000073157	Zfp65	UTR3
17631	peak_17631	chr18	37766952	37768252	10.1539	+	37766952	37768252	0	1	1300	0	897	7648	1098	6761	3.76932	2.6208	-1.05716	6.70411e-05	0.000877749	ENSMUST00000193045	Pcdhga12	UTR5
3163	peak_3163	chr3	108187396	108188621	10.1491	+	108187396	108188621	0	1	1225	0	286	7118	345	5705	5.37671	4.12181	-1.14663	6.73922e-05	0.000880675	ENSMUST00000106656	Amigo1	LastExon
8961	peak_8961	chr8	95352367	95352842	10.1491	+	95352367	95352842	0	1	475	0	298	2887	413	2501	2.67426	1.34909	-1.20871	6.73603e-05	0.000880675	ENSMUST00000034243	Mmp15	UTR5
5924	peak_5924	chr5	90278324	90283433	10.1468	-	90278324	90283433	0	2	67583	0,4526	1035	5833	1081	4198	3.6571	2.56196	-1.01265	6.75467e-05	0.000882083	ENSMUST00000218526	Ankrd17	Exon
15963	peak_15963	chr16	17159895	17160195	10.1462	+	17159895	17160195	0	1	300	0	291	2301	395	1636	4.26491	2.90658	-1.23473	6.76227e-05	0.000882464	ENSMUST00000231557	Ube2l3	UTR3
2129	peak_2129	chr2	30963778	30966988	10.1456	-	30963778	30966988	0	2	97,78	0,3132	98	639	144	408	3.81767	2.05321	-1.57757	6.76969e-05	0.000882822	ENSMUST00000123762	Tor1a	UTR3
9829	peak_9829	chr9	55223489	55223864	10.1439	+	55223489	55223864	0	1	375	0	521	5294	694	3198	4.58134	3.01381	-1.41396	6.79191e-05	0.000883886	ENSMUST00000140375	Fbxo22	UTR3
17444	peak_17444	chr18	31722186	31723061	10.1439	+	31722186	31723061	0	1	875	0	597	15030	677	11041	5.83836	4.69952	-1.05042	6.78681e-05	0.000883886	ENSMUST00000025109	Sap130	LastExon
18027	peak_18027	chr18	78753054	78753254	10.1439	-	78753054	78753254	0	1	200	0	201	1387	193	523	4.04941	2.33318	-1.5384	6.78892e-05	0.000883886	ENSMUST00000025430	Setbp1	UTR3
9644	peak_9644	chr8	124841778	124861234	10.1393	-	124841778	124861234	0	3	4,57,289	0,584,19167	1121	4415	1235	3414	3.12766	2.06648	-0.983516	6.81908e-05	0.000886665	ENSMUST00000212808	2810004N23Rik	UTR3
14458	peak_14458	chr13	99421663	99422038	10.1393	-	99421663	99422038	0	1	375	0	3770	72976	3387	40156	5.48965	4.32042	-1.07581	6.82267e-05	0.000886665	ENSMUST00000064762	Map1b	UTR3
2486	peak_2486	chr2	136082978	136083278	10.1378	-	136082978	136083278	0	1	300	0	58	2033	82	1027	6.36589	4.52372	-1.64611	6.83474e-05	0.000887622	ENSMUST00000077200	Pak7	UTR3
14159	peak_14159	chr13	23421713	23422288	10.134	-	23421713	23422288	0	1	575	0	283	3281	416	2363	4.59435	2.98791	-1.4459	6.85746e-05	0.00088996	ENSMUST00000041782	Abt1	UTR3
15766	peak_15766	chr15	84556347	84557072	10.1325	-	84556347	84557072	0	1	725	0	559	10960	636	8472	4.56012	3.3022	-1.15029	6.869e-05	0.000890844	ENSMUST00000069476	Rtl6	UTR3
1736	peak_1736	chr2	138283642	138284742	10.1271	+	138283642	138284742	0	1	1100	0	513	21873	834	23444	6.48194	5.29239	-1.09618	6.89978e-05	0.000894221	ENSMUST00000075410	Btbd3	LastExon
157	peak_157	chr1	63307142	63307617	10.1231	+	63307142	63307617	0	1	475	0	346	3537	505	2525	4.59208	3.2751	-1.20096	6.93465e-05	0.000896715	ENSMUST00000029025	Zdbf2	LastExon
5479	peak_5479	chr5	124490202	124491027	10.1231	+	124490202	124491027	0	1	825	0	770	6894	802	5696	3.89252	2.87116	-0.949039	6.9286e-05	0.000896715	ENSMUST00000111453	Snrnp35	LastExon
13630	peak_13630	chr12	76937793	76938643	10.1231	-	76937793	76938643	0	1	850	0	552	7357	582	5046	4.84477	3.65855	-1.08888	6.92892e-05	0.000896715	ENSMUST00000218640	Max	UTR3
17059	peak_17059	chr17	27190475	27190600	10.1231	-	27190475	27190600	0	1	125	0	117	591	163	494	2.96065	1.52851	-1.29888	6.93805e-05	0.000896715	ENSMUST00000237625	Lemd2	UTR3
15075	peak_15075	chr14	69787039	69787189	10.1189	-	69787039	69787189	0	1	150	0	52	484	81	253	4.40769	2.28206	-1.87866	6.96303e-05	0.000899327	ENSMUST00000022665	Rhobtb2	UTR3
9936	peak_9936	chr9	72619035	72620085	10.1179	+	72619035	72620085	0	1	1050	0	1168	38717	1305	24558	6.30159	5.15397	-1.06118	6.97658e-05	0.000899906	ENSMUST00000093820	Rfx7	LastExon
10289	peak_10289	chr9	22448310	22448735	10.1179	-	22448310	22448735	0	1	425	0	502	2611	633	2370	3.24713	2.1326	-1.02935	6.97705e-05	0.000899906	ENSMUST00000216973	Rp9	UTR3
481	peak_481	chr1	177447158	177448783	10.1137	+	177447158	177448783	0	1	1625	0	12437	431618	10853	184540	6.20479	4.63115	-1.41708	7.01696e-05	0.000902584	ENSMUST00000077225	Zbtb18	LastExon
1098	peak_1098	chr1	176735527	176735852	10.1137	-	176735527	176735852	0	1	325	0	1128	5876	1035	3422	3.60477	2.53362	-0.974163	7.01281e-05	0.000902584	ENSMUST00000194984	Cep170	UTR3
5572	peak_5572	chr5	138104131	138104781	10.1137	+	138104131	138104781	0	1	650	0	592	13390	559	7140	5.74718	4.59376	-1.06191	7.01126e-05	0.000902584	ENSMUST00000110962	Zkscan1	UTR3
14895	peak_14895	chr14	24157884	24158684	10.1137	-	24157884	24158684	0	1	800	0	818	12783	876	10138	4.59728	3.47195	-1.04032	7.00636e-05	0.000902584	ENSMUST00000090398	Dlg5	Exon
506	peak_506	chr1	180746828	180752708	10.1115	+	180746828	180752708	0	2	250550	0,5330	549	8158	747	6617	5.11018	3.85977	-1.14429	7.03214e-05	0.00090392	ENSMUST00000027780	Acbd3	LastExon
6863	peak_6863	chr6	48063544	48064919	10.1111	-	48063544	48064919	0	1	1375	0	526	15137	628	11889	5.32069	4.03053	-1.17725	7.03919e-05	0.000904209	ENSMUST00000203609	Zfp746	UTR3
387	peak_387	chr1	139446920	139447570	10.1095	+	139446920	139447570	0	1	650	0	433	19433	542	12925	6.73651	5.45678	-1.17495	7.06993e-05	0.000905207	ENSMUST00000199011	Zbtb41	UTR3
7921	peak_7921	chr7	5035913	5036463	10.1095	-	5035913	5036463	0	1	550	0	115	3429	201	3573	5.09406	3.58409	-1.36711	7.07575e-05	0.000905207	ENSMUST00000076251	Zfp865	UTR3
10067	peak_10067	chr9	108533803	108541822	10.1095	+	108533803	108541822	0	2	815135	0,7884	2265	42111	2239	29305	5.09525	3.94905	-1.05675	7.06775e-05	0.000905207	ENSMUST00000006851	Qrich1	Exon
12577	peak_12577	chr11	50257533	50257983	10.1095	-	50257533	50257983	0	1	450	0	174	3560	230	2659	5.54278	4.21956	-1.20671	7.06512e-05	0.000905207	ENSMUST00000059458	Maml1	UTR3
13210	peak_13210	chr12	52519401	52519826	10.1095	+	52519401	52519826	0	1	425	0	1147	11132	1423	7422	4.43137	3.34769	-1.00258	7.06263e-05	0.000905207	ENSMUST00000110725	Arhgap5	Exon
16386	peak_16386	chr16	45964662	45965087	10.1095	-	45964662	45965087	0	1	425	0	282	3445	265	1214	4.87318	3.01948	-1.65107	7.07442e-05	0.000905207	ENSMUST00000130481	Plcxd2	UTR3
6642	peak_6642	chr6	120364348	120364523	10.1085	+	120364348	120364523	0	1	175	0	121	1217	143	653	3.635	1.7817	-1.65174	7.08544e-05	0.000905832	ENSMUST00000152293	Kdm5a	UTR5
6959	peak_6959	chr6	86524848	86525273	10.1063	-	86524848	86525273	0	1	425	0	3110	50542	3486	38558	4.67105	3.44116	-1.12699	7.10079e-05	0.000907178	ENSMUST00000053015	Pcbp1	LastExon
6171	peak_6171	chr5	135249137	135250087	10.1062	-	135249137	135250087	0	1	950	0	312	12135	401	8783	5.78615	4.28018	-1.35952	7.1108e-05	0.000907228	ENSMUST00000062572	Fzd9	UTR3
18537	peak_18537	chr19	15955773	15956148	10.1062	-	15955773	15956148	0	1	375	0	346	8401	366	4303	5.85788	4.46284	-1.26779	7.10735e-05	0.000907228	ENSMUST00000047704	Cep78	UTR3
8271	peak_8271	chr7	78775235	78775510	10.1035	-	78775235	78775510	0	1	275	0	118	3138	157	1911	5.94656	4.33095	-1.452	7.12941e-05	0.000908988	ENSMUST00000032841	Mrpl46	UTR3
3895	peak_3895	chr4	59690412	59691262	10.0987	+	59690412	59691262	0	1	850	0	641	15163	1052	15983	5.67301	4.45887	-1.11786	7.16279e-05	0.00091201	ENSMUST00000052420	E130308A19Rik	Exon
13724	peak_13724	chr12	98434518	98435268	10.0987	-	98434518	98435268	0	1	750	0	469	17942	427	8879	6.46319	5.10971	-1.23284	7.1627e-05	0.00091201	ENSMUST00000110113	Kcnk10	UTR3
12953	peak_12953	chr11	102838472	102838597	10.0967	-	102838472	102838597	0	1	125	0	465	2581	541	1583	3.71971	2.39536	-1.20545	7.18351e-05	0.000913263	ENSMUST00000172611	Eftud2	UTR3
13465	peak_13465	chr12	113188022	113188872	10.0967	+	113188022	113188872	0	1	850	0	156	4805	186	3608	4.87049	3.46277	-1.27905	7.18229e-05	0.000913263	ENSMUST00000058491	Tmem121	UTR5
13738	peak_13738	chr12	100912724	100916621	10.0967	-	100912724	100916621	0	2	1081,44	0,3853	909	15734	759	9274	4.39226	3.17569	-1.11551	7.18715e-05	0.000913263	ENSMUST00000085096	Ccdc88c	UTR3
13502	peak_13502	chr12	15815237	15815637	10.0962	-	15815237	15815637	0	1	400	0	481	2551	641	2498	2.92156	1.7945	-1.03942	7.19428e-05	0.000913553	ENSMUST00000221215	Trib2	Exon
10699	peak_10699	chr9	108578925	108579125	10.0938	-	108578925	108579125	0	1	200	0	17	404	43	289	4.86089	2.2725	-2.26918	7.2111e-05	0.000915073	ENSMUST00000006853	P4htm	UTR3
4223	peak_4223	chr4	141200228	141200878	10.0915	+	141200228	141200878	0	1	650	0	315	9869	381	6738	6.08818	4.68869	-1.26974	7.22742e-05	0.000916526	ENSMUST00000030757	Fbxo42	LastExon
5971	peak_5971	chr5	106638082	106638507	10.0867	-	106638082	106638507	0	1	425	0	519	7408	761	6240	5.09098	3.90691	-1.08549	7.2613e-05	0.000919586	ENSMUST00000124263	Zfp644	LastExon
9394	peak_9394	chr8	72495282	72496432	10.0867	-	72495282	72496432	0	1	1150	0	381	13428	431	10469	5.49957	4.23607	-1.16154	7.26074e-05	0.000919586	ENSMUST00000058534	Med26	UTR3
1402	peak_1402	chr2	49548490	49550251	10.0853	+	49548490	49550251	0	2	274326	0,1435	732	26252	748	15078	6.40723	5.22466	-1.08978	7.27753e-05	0.000920524	ENSMUST00000092123	Epc2	LastExon
3003	peak_3003	chr3	88908137	88908512	10.0853	+	88908137	88908512	0	1	375	0	403	3585	450	2588	3.64201	2.29988	-1.22266	7.27847e-05	0.000920524	ENSMUST00000090942	Gon4l	Exon
13461	peak_13461	chr12	113071571	113072021	10.0783	+	113071571	113072021	0	1	450	0	557	17065	518	9874	5.98338	4.7079	-1.16588	7.32283e-05	0.00092497	ENSMUST00000220715	Pacs2	UTR5
16268	peak_16268	chr16	11220641	11220816	10.0783	-	11220641	11220816	0	1	175	0	386	1351	410	796	3.03579	1.86672	-1.07579	7.32343e-05	0.00092497	ENSMUST00000167025	Gspt1	UTR3
760	peak_760	chr1	82237150	82287847	10.0764	-	82237150	82287847	0	2	4541071	0,49626	2029	63858	2147	47068	5.98406	4.85634	-1.04312	7.33803e-05	0.000926193	ENSMUST00000069799	Irs1	UTR3
12048	peak_12048	chr11	74930011	74930586	10.0763	+	74930011	74930586	0	1	575	0	642	7223	641	4575	4.53882	3.29885	-1.1363	7.34351e-05	0.000926265	ENSMUST00000045281	Smg6	Exon
13467	peak_13467	chr12	116059032	116059432	10.0742	+	116059032	116059432	0	1	400	0	385	5977	464	3913	5.10393	4.04079	-0.984358	7.35897e-05	0.000927594	ENSMUST00000183125	Zfp386	LastExon
6705	peak_6705	chr6	136606777	136607152	10.0731	+	136606777	136607152	0	1	375	0	714	10850	671	5753	5.17257	3.98218	-1.09341	7.36945e-05	0.000928295	ENSMUST00000185332	Atf7ip	UTR5
8465	peak_8465	chr7	126152737	126153037	10.0727	-	126152737	126153037	0	1	300	0	237	4943	281	3224	5.56214	4.13883	-1.2896	7.37664e-05	0.00092858	ENSMUST00000169059	Xpo6	UTR3
987	peak_987	chr1	155847540	155848565	10.0725	-	155847540	155848565	0	1	1025	0	257	4874	381	3391	5.48745	4.01372	-1.32934	7.38244e-05	0.00092869	ENSMUST00000138762	Cep350	UTR3
352	peak_352	chr1	133132792	133137039	10.0721	+	133132792	133137039	0	2	823377	0,3870	1268	29462	1451	21433	5.75776	4.63084	-1.04168	7.38938e-05	0.000928944	ENSMUST00000052529	Ppp1r15b	Exon
8387	peak_8387	chr7	105758228	105759071	10.0705	-	105758228	105759071	0	2	48677	0,166	1149	13806	1037	10770	4.17227	3.26416	-0.850594	7.40242e-05	0.000929963	ENSMUST00000078482	Dchs1	Exon
5820	peak_5820	chr5	36795091	36795466	10.0691	-	36795091	36795466	0	1	375	0	2773	31131	3425	22200	4.74439	3.56666	-1.08211	7.41466e-05	0.00093088	ENSMUST00000068795	Mrfap1	UTR3
3831	peak_3831	chr4	43632359	43632784	10.0662	+	43632359	43632784	0	1	425	0	95	1489	136	1094	4.03395	2.34706	-1.5107	7.43437e-05	0.000932734	ENSMUST00000107874	Npr2	Exon
13979	peak_13979	chr13	55623179	55625158	10.0647	+	55623179	55625158	0	2	77448	0,1531	693	14615	767	10799	5.23823	4.00231	-1.13187	7.44707e-05	0.000933706	ENSMUST00000169228	Caml	UTR5
4381	peak_4381	chr4	32804959	32806334	10.0615	-	32804959	32806334	0	1	1375	0	855	14305	757	6691	5.29466	3.92428	-1.24524	7.46858e-05	0.00093578	ENSMUST00000084750	Ankrd6	UTR3
13	peak_13	chr1	9747647	9748072	10.0594	+	9747647	9748072	0	1	425	0	422	8073	489	6620	4.28818	3.06488	-1.12241	7.48441e-05	0.000937142	ENSMUST00000181821	1700034P13Rik	UTR5
16249	peak_16249	chr16	5014705	5015530	10.0483	-	5014705	5015530	0	1	825	0	1493	38161	1522	27090	5.49027	4.32871	-1.07048	7.54733e-05	0.000944393	ENSMUST00000023189	Glyr1	UTR3
17470	peak_17470	chr18	34770668	34771343	10.0476	+	34770668	34771343	0	1	675	0	529	15234	583	10691	5.39088	4.03011	-1.23358	7.55588e-05	0.000944836	ENSMUST00000235929	Fam53c	UTR3
2976	peak_2976	chr3	88536243	88537518	10.0453	+	88536243	88537518	0	1	1275	0	4632	132367	4337	97655	5.01282	3.94614	-0.98718	7.57327e-05	0.000946383	ENSMUST00000172699	Mex3a	LastExon
5698	peak_5698	chr5	3692449	3693474	10.0441	-	3692449	3693474	0	1	1025	0	538	14447	596	8579	5.90739	4.48447	-1.28841	7.58951e-05	0.000947157	ENSMUST00000043551	Ankib1	UTR3
10203	peak_10203	chr9	7933823	7934723	10.0441	-	7933823	7934723	0	1	900	0	805	19379	1163	18027	5.739	4.55322	-1.08766	7.58618e-05	0.000947157	ENSMUST00000065353	Yap1	UTR3
8417	peak_8417	chr7	115476543	115477068	10.0437	-	115476543	115477068	0	1	525	0	573	10334	466	4550	5.42037	4.15272	-1.16036	7.59682e-05	0.000947441	ENSMUST00000205405	Sox6	UTR3
15894	peak_15894	chr16	3744342	3744842	10.0424	+	3744342	3744842	0	1	500	0	438	4050	437	2833	3.56389	2.32418	-1.13475	7.60878e-05	0.000948306	ENSMUST00000160923	Zfp263	UTR5
3736	peak_3736	chr4	9281510	9282110	10.0422	+	9281510	9282110	0	1	600	0	529	16722	432	8181	6.21489	4.9993	-1.11875	7.61482e-05	0.000948432	ENSMUST00000108348	Clvs1	UTR5
1085	peak_1085	chr1	172004209	172004384	10.0416	-	172004209	172004384	0	1	175	0	453	1743	446	1029	3.02923	1.71621	-1.19056	7.623e-05	0.000948824	ENSMUST00000111263	Vangl2	UTR3
11448	peak_11448	chr10	78171259	78172084	10.0416	-	78171259	78172084	0	1	825	0	410	10745	406	6213	5.71281	4.33972	-1.25177	7.62812e-05	0.000948836	ENSMUST00000042556	Pwp2	UTR3
12649	peak_12649	chr11	62373097	62373297	10.0385	-	62373097	62373297	0	1	200	0	1986	8340	1791	4988	2.8909	1.65577	-1.12142	7.65336e-05	0.000950858	ENSMUST00000101068	Ncor1	UTR3
15449	peak_15449	chr15	102408398	102425634	10.0385	+	102408398	102425634	0	2	1321,4	0,17232	2034	23117	2267	17685	4.52788	3.35744	-1.0752	7.65447e-05	0.000950858	ENSMUST00000001326	Sp1	Exon
8706	peak_8706	chr8	25662762	25663237	10.0379	+	25662762	25663237	0	1	475	0	1183	8503	1175	5455	4.07112	2.96049	-1.0246	7.66234e-05	0.000951209	ENSMUST00000143445	Nsd3	LastExon
1834	peak_1834	chr2	156550822	156550972	10.0373	+	156550822	156550972	0	1	150	0	42	578	93	384	4.27768	1.88565	-2.09676	7.67062e-05	0.000951611	ENSMUST00000150212	Aar2	LastExon
11999	peak_11999	chr11	69998331	69999736	10.0359	+	69998331	69999736	0	2	801499	0,906	2217	53186	2574	42789	5.40087	4.23933	-1.0647	7.69704e-05	0.000952554	ENSMUST00000135814	Phf23	UTR5
12195	peak_12195	chr11	94339561	94340411	10.0359	+	94339561	94340411	0	1	850	0	584	15702	711	11158	5.92334	4.65763	-1.15997	7.68741e-05	0.000952554	ENSMUST00000124087	Ankrd40	UTR5
13728	peak_13728	chr12	98790053	98790228	10.0359	-	98790053	98790228	0	1	175	0	197	1486	189	555	4.16164	2.39561	-1.57675	7.69484e-05	0.000952554	ENSMUST00000222717	Eml5	UTR3
15072	peak_15072	chr14	69705219	69705719	10.0359	-	69705219	69705719	0	1	500	0	1375	6725	1535	5665	2.596	1.47368	-1.03467	7.69843e-05	0.000952554	ENSMUST00000216152	R3hcc1	Exon
10239	peak_10239	chr9	15995829	15996354	10.0339	-	15995829	15996354	0	1	525	0	733	13214	641	6225	5.33079	3.92883	-1.27255	7.71421e-05	0.000953881	ENSMUST00000082170	Fat3	Exon
615	peak_615	chr1	36549066	36550166	10.032	-	36549066	36550166	0	1	1100	0	1155	40518	1183	29234	5.50704	4.30654	-1.09966	7.73308e-05	0.000955137	ENSMUST00000114991	Sema4c	UTR3
13963	peak_13963	chr13	54526265	54528396	10.032	+	54526265	54528396	0	2	407,93	0,2038	264	2694	300	1744	4.59491	3.38603	-1.10782	7.7345e-05	0.000955137	ENSMUST00000121401	Simc1	Exon
17500	peak_17500	chr18	36797928	36798053	10.0257	+	36797928	36798053	0	1	125	0	1542	5564	1897	4417	3.0737	2.00409	-0.991724	7.77362e-05	0.000959341	ENSMUST00000235399	Zmat2	UTR5
7856	peak_7856	chr7	132983835	132984260	10.0241	+	132983835	132984260	0	1	425	0	420	7488	531	4714	5.39798	4.08845	-1.19379	7.79184e-05	0.000960416	ENSMUST00000106157	Zranb1	LastExon
16670	peak_16670	chr17	28966770	28967120	10.0241	+	28966770	28967120	0	1	350	0	619	4761	674	3438	4.03192	2.86912	-1.07023	7.79253e-05	0.000960416	ENSMUST00000122163	Kctd20	UTR3
2453	peak_2453	chr2	130591201	130591701	10.0217	-	130591201	130591701	0	1	500	0	107	1672	114	986	4.92216	3.44512	-1.33413	7.81018e-05	0.000961963	ENSMUST00000028761	Ubox5	UTR3
5335	peak_5335	chr5	110231403	110236278	10.0213	+	110231403	110236278	0	3	20,474,6	0,2943,4869	527	5337	573	3649	4.42639	3.18965	-1.13256	7.81765e-05	0.000962255	ENSMUST00000196865	Ankle2	UTR5
6617	peak_6617	chr6	116314068	116314293	10.0199	+	116314068	116314293	0	1	225	0	43	1099	110	1009	5.86291	3.9063	-1.73264	7.83014e-05	0.000963163	ENSMUST00000222494	Zfand4	UTR3
11742	peak_11742	chr11	20020857	20021407	10.0198	+	20020857	20021407	0	1	550	0	502	8167	546	5935	4.47602	3.1952	-1.168	7.83605e-05	0.000963262	ENSMUST00000093298	Spred2	LastExon
12837	peak_12837	chr11	87080196	87080621	10.0186	-	87080196	87080621	0	1	425	0	156	6005	210	4323	6.44086	5.03387	-1.27052	7.84778e-05	0.000964076	ENSMUST00000020801	Smg8	Exon
5906	peak_5906	chr5	76915098	76915348	10.0172	-	76915098	76915348	0	1	250	0	175	1944	206	898	4.70501	3.05962	-1.47454	7.86024e-05	0.000964978	ENSMUST00000031158	Ppat	UTR3
7603	peak_7603	chr7	80224760	80225135	10.0139	+	80224760	80225135	0	1	375	0	157	1753	189	1195	4.01305	2.50825	-1.35692	7.88321e-05	0.000967168	ENSMUST00000205822	Sema4b	LastExon
8749	peak_8749	chr8	44952382	44952807	10.0133	+	44952382	44952807	0	1	425	0	805	5256	1178	4406	3.89734	2.56399	-1.21463	7.89169e-05	0.000967579	ENSMUST00000215588	Fat1	Exon
3178	peak_3178	chr3	122276357	122278767	10.0132	+	122276357	122278767	0	2	453,22	0,2388	620	18599	703	13060	6.1492	5.02335	-1.03705	7.89776e-05	0.000967694	ENSMUST00000035776	Dnttip2	Exon
1726	peak_1726	chr2	132750463	132750863	10.0093	+	132750463	132750863	0	1	400	0	27	935	61	843	6.12721	4.17332	-1.73285	7.92407e-05	0.000970287	ENSMUST00000110132	Shld1	LastExon
1004	peak_1004	chr1	156808790	156809065	10.0082	-	156808790	156809065	0	1	275	0	270	3872	283	1956	5.03349	3.49036	-1.39048	7.93531e-05	0.000971032	ENSMUST00000189208	Ralgps2	UTR3
8210	peak_8210	chr7	51862151	51862267	10.0078	-	51862151	51862267	0	1	116	0	69	880	102	582	3.2764	1.44167	-1.6328	7.94263e-05	0.000971298	ENSMUST00000129604	Gas2	UTR5
8132	peak_8132	chr7	35775245	35776245	10.0051	-	35775245	35776245	0	1	1000	0	511	11168	501	6231	5.44392	4.00512	-1.30119	7.96283e-05	0.000973137	ENSMUST00000206615	Zfp507	UTR3
4032	peak_4032	chr4	116096655	116097030	10.004	+	116096655	116097030	0	1	375	0	338	4191	334	2253	4.78973	3.40902	-1.25401	7.97384e-05	0.000973852	ENSMUST00000139147	Rad54l	UTR3
12089	peak_12089	chr11	77953627	77954834	10.0037	+	77953627	77954834	0	2	440,85	0,1122	2947	41839	2414	19738	4.32632	2.85391	-1.27861	7.98059e-05	0.000974045	ENSMUST00000138346	Sez6	UTR5
2643	peak_2643	chr2	165001281	165001956	10.0002	-	165001281	165001956	0	1	675	0	790	7931	831	5807	4.10801	2.93626	-1.07844	8.00522e-05	0.00097642	ENSMUST00000122070	Ncoa5	UTR3
6506	peak_6506	chr6	83118631	83118831	9.99825	+	83118631	83118831	0	1	200	0	222	1838	234	1079	4.25472	2.89768	-1.23247	8.02129e-05	0.000977746	ENSMUST00000032114	Mogs	LastExon
10549	peak_10549	chr9	72614114	72617053	9.99403	-	72614114	72617053	0	2	42427	0,2512	393	4218	525	3744	4.54246	3.37228	-1.07413	8.04998e-05	0.00098061	ENSMUST00000185013	Gm27241	UTR3
12176	peak_12176	chr11	88073126	88073601	9.99244	+	88073126	88073601	0	1	475	0	884	4954	896	3808	3.48959	2.44082	-0.969765	8.06409e-05	0.000981695	ENSMUST00000018521	Vezf1	Exon
4589	peak_4589	chr4	108260021	108266448	9.98976	-	108260021	108266448	0	2	69631	0,5796	768	10186	791	6835	4.94018	3.83042	-1.02376	8.09039e-05	0.000983519	ENSMUST00000043616	Zyg11b	Exon
12466	peak_12466	chr11	5279523	5279798	9.98976	-	5279523	5279798	0	1	275	0	96	981	174	750	4.594	2.88463	-1.5271	8.09622e-05	0.000983519	ENSMUST00000172492	Znrf3	UTR3
14049	peak_14049	chr13	81749969	81750269	9.98976	+	81749969	81750269	0	1	300	0	28	697	58	530	5.73858	3.7169	-1.78777	8.08597e-05	0.000983519	ENSMUST00000224299	Mblac2	LastExon
18848	peak_18848	chrX	103507399	103507589	9.98976	+	103507399	103507589	0	1	190	0	99	901	104	430	4.34647	2.7022	-1.47255	8.09994e-05	0.000983519	ENSMUST00000121201	Gm9670	UTR5
2530	peak_2530	chr2	151030503	151030828	9.98824	-	151030503	151030828	0	1	325	0	66	713	124	474	4.66945	2.7567	-1.69699	8.11723e-05	0.000984556	ENSMUST00000066640	Nanp	LastExon
7016	peak_7016	chr6	100573205	100573580	9.98824	-	100573205	100573580	0	1	375	0	80	1701	127	1227	5.08651	3.27458	-1.6157	8.11892e-05	0.000984556	ENSMUST00000089245	Shq1	UTR3
589	peak_589	chr1	23369473	23370323	9.98793	-	23369473	23370323	0	1	850	0	248	9920	329	7139	6.57149	5.36506	-1.10507	8.1259e-05	0.000984769	ENSMUST00000186064	Ogfrl1	UTR3
7876	peak_7876	chr7	141258215	141258640	9.97524	+	141258215	141258640	0	1	425	0	409	4528	439	3336	3.887	2.62028	-1.15629	8.20296e-05	0.000993469	ENSMUST00000155123	Phrf1	UTR3
17594	peak_17594	chr18	37506388	37506838	9.97141	+	37506388	37506838	0	1	450	0	18	954	46	712	6.86521	4.49771	-2.07254	8.23001e-05	0.000996106	ENSMUST00000052179	Pcdhb20	LastExon
12838	peak_12838	chr11	87085031	87085506	9.96721	-	87085031	87085506	0	1	475	0	132	2704	198	2369	5.57241	4.31452	-1.14956	8.25932e-05	0.000999012	ENSMUST00000143280	Smg8	Exon
13058	peak_13058	chr11	116337952	116338652	9.96663	-	116337952	116338652	0	1	700	0	464	13624	447	8678	5.59527	4.32916	-1.15539	8.27327e-05	0.000999417	ENSMUST00000106398	Rnf157	UTR3
15261	peak_15261	chr15	74588755	74589443	9.96663	+	74588755	74589443	0	1	688	0	1073	20660	977	13244	4.02568	2.81374	-1.10992	8.27133e-05	0.000999417	ENSMUST00000187485	Adgrb1	UTR3
1393	peak_1393	chr2	38586292	38586442	9.96554	+	38586292	38586442	0	1	150	0	280	1202	298	645	3.34542	2.01845	-1.20689	8.2868e-05	0.00100017	ENSMUST00000112902	Nek6	UTR3
13380	peak_13380	chr12	102003528	102003853	9.96554	+	102003528	102003853	0	1	325	0	451	4612	559	2940	4.60267	3.28849	-1.19544	8.29158e-05	0.00100017	ENSMUST00000047357	Cpsf2	UTR3
16594	peak_16594	chr17	23753498	23753923	9.96554	+	23753498	23753923	0	1	425	0	208	2757	267	2391	4.70724	3.51933	-1.08955	8.29539e-05	0.00100017	ENSMUST00000227120	Flywch1	UTR3
13315	peak_13315	chr12	82425225	82433693	9.96424	+	82425225	82433693	0	3	230,240,5	0,7527,8463	328	4580	337	3043	4.1858	2.85454	-1.21062	8.30819e-05	0.00100107	ENSMUST00000053969	Sipa1l1	Exon
17512	peak_17512	chr18	37011133	37011583	9.96245	+	37011133	37011583	0	1	450	0	74	1085	124	681	5.10231	3.20436	-1.68544	8.32384e-05	0.00100232	ENSMUST00000097612	Gm10545	UTR3
564	peak_564	chr1	9724896	9725346	9.95672	-	9724896	9725346	0	1	450	0	258	1996	339	1218	4.19903	2.72971	-1.32637	8.3803e-05	0.0010063	ENSMUST00000057438	Vcpip1	LastExon
8440	peak_8440	chr7	119784926	119785576	9.95672	-	119784926	119785576	0	1	650	0	187	3582	241	2105	5.45648	4.0883	-1.24569	8.37042e-05	0.0010063	ENSMUST00000139192	Eri2	UTR3
13952	peak_13952	chr13	51847995	51848468	9.95672	+	51847995	51848468	0	1	473	0	1611	37205	1221	18314	4.68631	3.34886	-1.21563	8.38306e-05	0.0010063	ENSMUST00000021903	Gadd45g	UTR3
15235	peak_15235	chr15	57823184	57838623	9.95672	+	57823184	57838623	0	2	567,33	0,15406	429	10413	536	9020	5.13984	3.92706	-1.11034	8.37566e-05	0.0010063	ENSMUST00000096430	Zhx2	Exon
15719	peak_15719	chr15	81013055	81013630	9.95672	-	81013055	81013630	0	1	575	0	156	6898	189	5744	5.81994	4.55539	-1.16228	8.38896e-05	0.0010063	ENSMUST00000131235	Mrtfa	UTR3
15793	peak_15793	chr15	89120594	89122522	9.95672	-	89120594	89122522	0	2	79446	0,1482	351	3545	407	2678	4.15041	2.84698	-1.18777	8.38555e-05	0.0010063	ENSMUST00000231098	Tubgcp6	UTR3
17552	peak_17552	chr18	37344151	37344326	9.95381	+	37344151	37344326	0	1	175	0	5	272	18	110	6.95673	3.30822	-3.1502	8.41123e-05	0.00100833	ENSMUST00000053037	Pcdhb7	LastExon
9668	peak_9668	chr9	4383534	4384830	9.95047	+	4383534	4384830	0	2	608,92	0,1204	1094	17870	1321	12846	5.28627	4.09922	-1.08894	8.43613e-05	0.00101067	ENSMUST00000047173	Msantd4	UTR5
4612	peak_4612	chr4	116096563	116096763	9.95021	-	116096563	116096763	0	1	200	0	257	3824	254	2009	4.61003	3.05774	-1.39563	8.44838e-05	0.00101086	ENSMUST00000139147	Rad54l	UTR3
16005	peak_16005	chr16	20679566	20679966	9.95021	+	20679566	20679966	0	1	400	0	1788	7241	1822	5928	2.74499	1.75009	-0.924681	8.44806e-05	0.00101086	ENSMUST00000132320	Eif4g1	UTR5
3573	peak_3573	chr3	103802804	103803604	9.95013	-	103802804	103803604	0	1	800	0	160	5892	188	3606	6.43406	5.00859	-1.28892	8.4649e-05	0.00101091	ENSMUST00000198752	Dclre1b	UTR3
3977	peak_3977	chr4	104741661	104742111	9.95013	+	104741661	104742111	0	1	450	0	512	15958	416	5820	6.19657	4.57361	-1.45634	8.4558e-05	0.00101091	ENSMUST00000106830	Dab1	UTR3
18121	peak_18121	chr19	6062091	6062466	9.95013	+	6062091	6062466	0	1	375	0	240	3219	300	2755	4.01389	2.75056	-1.15283	8.46306e-05	0.00101091	ENSMUST00000162726	Znhit2	LastExon
3341	peak_3341	chr3	51689710	51690485	9.94876	-	51689710	51690485	0	1	775	0	183	5234	325	5706	5.29412	3.86495	-1.29258	8.4783e-05	0.00101187	ENSMUST00000121440	Maml3	UTR3
16454	peak_16454	chr16	90229106	90230156	9.94811	-	90229106	90230156	0	1	1050	0	1754	28108	1846	20421	4.97754	3.83967	-1.04775	8.4875e-05	0.00101233	ENSMUST00000039280	Scaf4	UTR3
12990	peak_12990	chr11	107073669	107074469	9.94639	-	107073669	107074469	0	1	800	0	1348	8774	1588	7172	3.93265	2.93465	-0.927177	8.50299e-05	0.00101353	ENSMUST00000106762	Bptf	Exon
11832	peak_11832	chr11	50199776	50200115	9.94628	+	50199776	50200115	0	1	339	0	119	3302	176	2352	5.63955	3.96244	-1.49896	8.50899e-05	0.00101361	ENSMUST00000015981	Sqstm1	UTR3
365	peak_365	chr1	134631192	134631717	9.94433	+	134631192	134631717	0	1	525	0	554	7713	569	4697	5.02475	3.82891	-1.09682	8.53224e-05	0.00101498	ENSMUST00000112198	Kdm5b	UTR3
7589	peak_7589	chr7	78910647	78911147	9.94433	+	78910647	78911147	0	1	500	0	94	1703	110	920	5.24521	3.54344	-1.51839	8.53079e-05	0.00101498	ENSMUST00000107425	Aen	UTR3
18353	peak_18353	chr19	45026033	45026983	9.94433	+	45026033	45026983	0	1	950	0	1136	16750	1367	14478	4.07833	2.88646	-1.09414	8.53665e-05	0.00101498	ENSMUST00000178087	Lzts2	LastExon
8757	peak_8757	chr8	45040756	45041939	9.94161	+	45040756	45041939	0	2	240,60	0,1123	633	13508	750	9897	4.85313	3.47624	-1.23852	8.55816e-05	0.0010169	ENSMUST00000215588	Fat1	Exon
13374	peak_13374	chr12	99891563	99894733	9.93942	+	99891563	99894733	0	3	182,44,24	0,2054,3146	181	1530	220	906	4.17899	2.56061	-1.45011	8.57661e-05	0.00101845	ENSMUST00000151019	Tdp1	UTR5
7952	peak_7952	chr7	13005676	13006101	9.93674	-	13005676	13006101	0	1	425	0	141	3315	162	2375	5.28297	3.91605	-1.24074	8.59794e-05	0.00102034	ENSMUST00000051390	Zbtb45	UTR3
294	peak_294	chr1	106172351	106281441	9.93663	+	106172351	106281441	0	2	1096,79	0,109011	1181	17721	1055	12574	3.5655	2.53514	-0.954925	8.60398e-05	0.00102041	ENSMUST00000061047	Phlpp1	Exon
12410	peak_12410	chr11	120259199	120272758	9.93652	+	120259199	120272758	0	3	521231400	0,9107,12159	949	14928	1080	14658	4.00148	3.03328	-0.901898	8.61007e-05	0.00102049	ENSMUST00000118987	Bahcc1	Exon
12062	peak_12062	chr11	75679433	75700602	9.93204	+	75679433	75700602	0	3	231,536,58	0,12763,21111	1741	27401	2059	22805	4.52212	3.3242	-1.0974	8.64228e-05	0.00102366	ENSMUST00000147718	Crk	Exon
15522	peak_15522	chr15	33685700	33685975	9.9315	-	33685700	33685975	0	1	275	0	15	460	37	264	6.16359	3.57785	-2.25234	8.66179e-05	0.00102405	ENSMUST00000042021	Tspyl5	UTR3
16194	peak_16194	chr16	91657689	91658814	9.9315	+	91657689	91658814	0	1	1125	0	4511	40727	4869	30614	4.38061	3.34834	-0.956456	8.65711e-05	0.00102405	ENSMUST00000114036	Son	Exon
17233	peak_17233	chr17	46800815	46801690	9.9315	-	46800815	46801690	0	1	875	0	233	10074	265	7303	6.24586	4.96221	-1.16498	8.66088e-05	0.00102405	ENSMUST00000233537	Bicral	UTR3
1300	peak_1300	chr2	28686884	28687409	9.93089	+	28686884	28687409	0	1	525	0	411	12098	419	8164	5.74511	4.49566	-1.14364	8.67633e-05	0.00102448	ENSMUST00000133565	Tsc1	UTR3
6663	peak_6663	chr6	125032028	125032503	9.93089	+	125032028	125032503	0	1	475	0	65	1273	106	975	5.55676	4.04685	-1.3588	8.6745e-05	0.00102448	ENSMUST00000145566	Zfp384	UTR5
8388	peak_8388	chr7	105762430	105762755	9.92148	-	105762430	105762755	0	1	325	0	518	6330	489	4777	3.17113	2.16845	-0.931045	8.73858e-05	0.00103119	ENSMUST00000078482	Dchs1	Exon
2983	peak_2983	chr3	88726105	88726230	9.91944	+	88726105	88726230	0	1	125	0	22	375	34	159	5.22304	2.75742	-2.1523	8.75643e-05	0.00103265	ENSMUST00000170377	Rit1	UTR3
7224	peak_7224	chr7	6190128	6190578	9.91588	+	6190128	6190578	0	1	450	0	385	2805	417	2031	3.6199	2.37432	-1.13733	8.78355e-05	0.0010352	ENSMUST00000108566	Zfp444	UTR3
16192	peak_16192	chr16	91655639	91656214	9.91556	+	91655639	91656214	0	1	575	0	2576	12545	2729	11061	2.35632	1.35996	-0.925655	8.79098e-05	0.00103542	ENSMUST00000114036	Son	Exon
1207	peak_1207	chr2	4906682	4907082	9.91319	+	4906682	4907082	0	1	400	0	911	6200	979	4288	4.00884	2.92397	-1.00124	8.81096e-05	0.00103713	ENSMUST00000115019	Sephs1	LastExon
6823	peak_6823	chr6	35046028	35051506	9.90984	-	35046028	35051506	0	2	330445	0,5033	522	6533	558	3857	4.86764	3.56146	-1.18889	8.83696e-05	0.00103954	ENSMUST00000202417	Cnot4	Exon
8895	peak_8895	chr8	83083436	83083911	9.90398	+	83083436	83083911	0	1	475	0	66	2899	109	2352	6.59239	5.05708	-1.38021	8.87841e-05	0.00104377	ENSMUST00000211485	Gm45449	UTR3
15673	peak_15673	chr15	76736841	76737016	9.90209	-	76736841	76737016	0	1	175	0	168	1286	226	1117	3.0222	1.65745	-1.23773	8.8956e-05	0.00104514	ENSMUST00000177011	Arhgap39	UTR3
2355	peak_2355	chr2	114195860	114196635	9.89895	-	114195860	114196635	0	1	775	0	195	7459	246	4690	6.45167	5.2174	-1.12723	8.92053e-05	0.00104741	ENSMUST00000050668	Zfp770	LastExon
9534	peak_9534	chr8	107076171	107076971	9.89884	-	107076171	107076971	0	1	800	0	517	13029	549	9166	5.69276	4.51182	-1.08243	8.92677e-05	0.00104749	ENSMUST00000141205	Terf2	UTR3
11905	peak_11905	chr11	59455352	59456077	9.89797	+	59455352	59456077	0	1	725	0	232	6697	289	4429	6.03704	4.60495	-1.2935	8.93772e-05	0.00104813	ENSMUST00000147163	Jmjd4	UTR3
18669	peak_18669	chr19	60764117	60766767	9.89732	-	60764117	60766767	0	2	116434	0,2216	9495	110693	9685	75705	4.52727	3.32733	-1.0988	8.94733e-05	0.0010486	ENSMUST00000025955	Eif3a	Exon
2842	peak_2842	chr3	34650004	34651829	9.89691	+	34650004	34651829	0	1	1825	0	5686	190532	6206	152189	5.49676	4.31695	-1.08162	8.96102e-05	0.0010489	ENSMUST00000099151	Sox2	UTR5
5540	peak_5540	chr5	135181201	135181701	9.89691	+	135181201	135181701	0	1	500	0	239	5224	263	3487	5.44778	4.14401	-1.18888	8.95841e-05	0.0010489	ENSMUST00000111188	Bcl7b	UTR3
14569	peak_14569	chr14	27464148	27464373	9.89612	+	27464148	27464373	0	1	225	0	309	1791	405	1191	3.76753	2.46516	-1.18551	8.97144e-05	0.00104947	ENSMUST00000223688	Fam208a	UTR5
2683	peak_2683	chr2	167106327	167188424	9.89217	-	167106327	167188424	0	2	32368	0,81729	56	789	135	1069	4.03272	2.4645	-1.40784	9.00165e-05	0.00105235	ENSMUST00000059826	Kcnb1	Exon
13276	peak_13276	chr12	76110052	76110427	9.8912	+	76110052	76110427	0	1	375	0	536	8492	482	4659	5.03901	3.75546	-1.16977	9.01327e-05	0.00105306	ENSMUST00000132161	Syne2	UTR3
13282	peak_13282	chr12	76385885	76387560	9.8898	+	76385885	76387560	0	1	1675	0	933	21020	1388	18921	5.73507	4.69221	-0.96508	9.02763e-05	0.00105408	ENSMUST00000042779	Zbtb1	LastExon
9557	peak_9557	chr8	111450183	111450908	9.88886	-	111450183	111450908	0	1	725	0	84	2885	118	2067	6.2232	4.66507	-1.39687	9.04328e-05	0.00105477	ENSMUST00000211981	Wdr59	UTR3
12830	peak_12830	chr11	86061212	86061887	9.88886	-	86061212	86061887	0	1	675	0	80	6209	144	4311	7.52623	5.83882	-1.50835	9.05028e-05	0.00105477	ENSMUST00000044423	Brip1	UTR3
16637	peak_16637	chr17	26961074	26961699	9.88886	+	26961074	26961699	0	2	36264	0,361	279	2283	428	2373	3.24557	1.96086	-1.16721	9.04652e-05	0.00105477	ENSMUST00000231853	Syngap1	Exon
17593	peak_17593	chr18	37505688	37506288	9.88317	+	37505688	37506288	0	1	600	0	17	865	44	629	6.19968	3.62102	-2.24731	9.09166e-05	0.00105893	ENSMUST00000052179	Pcdhb20	LastExon
8072	peak_8072	chr7	28739665	28739940	9.88125	-	28739665	28739940	0	1	275	0	265	2072	361	1656	4.0046	2.62706	-1.25039	9.10942e-05	0.00106035	ENSMUST00000056078	Mrps12	UTR3
13098	peak_13098	chr11	119147044	119147294	9.87878	-	119147044	119147294	0	1	250	0	708	4267	757	2961	3.04192	1.74729	-1.17846	9.13629e-05	0.00106216	ENSMUST00000207655	Tbc1d16	UTR3
16792	peak_16792	chr17	46396759	46397284	9.87878	+	46396759	46397284	0	1	525	0	628	9891	681	7255	5.10885	3.99758	-1.02655	9.13157e-05	0.00106216	ENSMUST00000138127	Zfp318	Exon
10195	peak_10195	chr9	123519599	123520049	9.87616	+	123519599	123520049	0	1	450	0	139	1847	198	1226	4.78302	3.08291	-1.51645	9.1585e-05	0.00106409	ENSMUST00000026269	Limd1	UTR3
1205	peak_1205	chr2	4611018	4612168	9.87359	+	4611018	4612168	0	1	1150	0	1675	60076	1475	37780	6.23404	5.192	-0.963438	9.18618e-05	0.00106599	ENSMUST00000075767	Frmd4a	UTR3
2979	peak_2979	chr3	88646856	88647131	9.87359	+	88646856	88647131	0	1	275	0	542	3316	547	2215	3.61884	2.42922	-1.09026	9.18569e-05	0.00106599	ENSMUST00000170653	Arhgef2	LastExon
8946	peak_8946	chr8	93956177	93956552	9.86959	+	93956177	93956552	0	1	375	0	789	15113	667	8929	4.9136	3.70047	-1.11287	9.21733e-05	0.00106895	ENSMUST00000144451	Gnao1	UTR5
7312	peak_7312	chr7	19394660	19395435	9.86798	+	19394660	19395435	0	1	775	0	316	5982	358	4623	4.39936	3.10785	-1.17844	9.23332e-05	0.00107015	ENSMUST00000108460	Ercc2	UTR3
6227	peak_6227	chr5	139337663	139338752	9.86712	-	139337663	139338752	0	2	712,13	0,1076	362	4244	418	2991	4.58149	3.27146	-1.19088	9.24447e-05	0.00107078	ENSMUST00000197520	Cox19	UTR3
9208	peak_9208	chr8	11612432	11612807	9.86692	-	11612432	11612807	0	1	375	0	578	7728	578	4501	4.21881	2.7312	-1.33915	9.25147e-05	0.00107093	ENSMUST00000211690	Ankrd10	UTR3
5309	peak_5309	chr5	105813122	105813547	9.86269	+	105813122	105813547	0	1	425	0	359	5397	380	4027	4.85689	3.72617	-1.04029	9.28434e-05	0.00107408	ENSMUST00000149831	Lrrc8d	UTR5
2711	peak_2711	chr2	168925442	168926517	9.86211	-	168925442	168926517	0	1	1075	0	395	11932	463	9221	5.53896	4.26366	-1.1628	9.30283e-05	0.0010745	ENSMUST00000087971	Zfp64	UTR3
10553	peak_10553	chr9	73015704	73016254	9.86211	-	73015704	73016254	0	1	550	0	207	3878	245	2509	5.34957	3.92012	-1.29631	9.29932e-05	0.0010745	ENSMUST00000098566	Pigb	UTR3
18716	peak_18716	chrX	37191919	37192444	9.86211	+	37191919	37192444	0	1	525	0	45	1009	87	816	5.6875	3.93475	-1.56292	9.30512e-05	0.0010745	ENSMUST00000046433	Rnf113a1	LastExon
5456	peak_5456	chr5	123147616	123148816	9.86078	+	123147616	123148816	0	1	1200	0	948	17692	1058	17227	4.30077	3.36986	-0.86956	9.3224e-05	0.00107549	ENSMUST00000100731	Setd1b	UTR5
14814	peak_14814	chr14	84445812	84446887	9.86078	+	84445812	84446887	0	1	1075	0	227	4990	343	5501	4.65999	3.48023	-1.07923	9.3251e-05	0.00107549	ENSMUST00000071370	Pcdh17	UTR5
6386	peak_6386	chr6	38499230	38502516	9.85938	+	38499230	38502516	0	2	46279	0,3007	631	2270	666	1745	3.00695	1.97618	-0.954657	9.33988e-05	0.00107654	ENSMUST00000159925	Ubn2	UTR5
3012	peak_3012	chr3	89076092	89076267	9.85888	+	89076092	89076267	0	1	175	0	346	1352	457	1234	2.69901	1.48987	-1.10606	9.34886e-05	0.00107692	ENSMUST00000090933	Ash1l	Exon
11416	peak_11416	chr10	71228113	71228463	9.84829	-	71228113	71228463	0	1	350	0	311	14717	320	8247	6.81794	5.57899	-1.1317	9.42347e-05	0.00108485	ENSMUST00000092430	Tfam	UTR3
3862	peak_3862	chr4	49529086	49530011	9.84575	+	49529086	49530011	0	1	925	0	354	5222	455	3809	5.12768	3.9535	-1.07668	9.4711e-05	0.00108676	ENSMUST00000107696	Zfp189	LastExon
4308	peak_4308	chr4	154015924	154015974	9.84575	+	154015924	154015974	0	1	50	0	444	1875	550	1810	2.23885	1.13245	-1.01899	9.47964e-05	0.00108676	ENSMUST00000030894	Lrrc47	Exon
8707	peak_8707	chr8	25754633	25768661	9.84575	+	25754633	25768661	0	2	861039	0,12989	532	23796	514	13769	6.71254	5.51969	-1.09421	9.46013e-05	0.00108676	ENSMUST00000038498	Bag4	UTR3
8872	peak_8872	chr8	75001247	75016309	9.84575	+	75001247	75016309	0	2	337,88	0,14974	927	13280	932	9043	4.8144	3.63942	-1.07596	9.47533e-05	0.00108676	ENSMUST00000145919	Hmgxb4	UTR3
11169	peak_11169	chr10	105847044	105847469	9.84575	+	105847044	105847469	0	1	425	0	285	2950	387	2004	4.47088	3.34844	-1.03378	9.48041e-05	0.00108676	ENSMUST00000133538	Ccdc59	UTR5
13581	peak_13581	chr12	69192874	69196964	9.84575	-	69192874	69196964	0	2	77473	0,3617	304	3303	433	2519	4.29579	2.76044	-1.37989	9.47932e-05	0.00108676	ENSMUST00000021356	Dnaaf2	Exon
15433	peak_15433	chr15	101290379	101290429	9.84575	+	101290379	101290429	0	1	50	0	314	1457	423	1111	3.1078	1.64841	-1.31623	9.45241e-05	0.00108676	ENSMUST00000048393	Atg101	LastExon
12907	peak_12907	chr11	98157428	98158303	9.84408	-	98157428	98158303	0	1	875	0	1252	11296	1340	8949	4.26266	3.24593	-0.945378	9.49718e-05	0.00108802	ENSMUST00000147933	Med1	UTR3
1939	peak_1939	chr2	178420544	178421544	9.84259	+	178420544	178421544	0	1	1000	0	47	1802	77	1312	6.22951	4.41901	-1.60898	9.51273e-05	0.00108914	ENSMUST00000094251	Fam217b	LastExon
11225	peak_11225	chr10	127742089	127743539	9.84209	+	127742089	127743539	0	1	1450	0	955	10807	1159	10839	4.07788	3.08863	-0.919843	9.52185e-05	0.00108952	ENSMUST00000054287	Zbtb39	LastExon
3394	peak_3394	chr3	63698708	63699383	9.8418	-	63698708	63699383	0	1	675	0	161	4620	232	3349	6.03806	4.51722	-1.36757	9.52951e-05	0.00108974	ENSMUST00000159676	Plch1	UTR3
5260	peak_5260	chr5	92952881	92953006	9.8411	+	92952881	92953006	0	1	125	0	102	645	140	429	3.55327	1.85832	-1.51169	9.53989e-05	0.00109027	ENSMUST00000113051	Shroom3	Exon
4670	peak_4670	chr4	121146197	121146997	9.83675	-	121146197	121146997	0	1	800	0	441	9922	521	6838	5.74119	4.60334	-1.04417	9.59771e-05	0.00109356	ENSMUST00000056635	Rlf	UTR3
4698	peak_4698	chr4	126316171	126316771	9.83675	-	126316171	126316771	0	1	600	0	338	5802	403	4550	4.49331	3.17528	-1.19837	9.59534e-05	0.00109356	ENSMUST00000128188	Adprhl2	UTR3
8437	peak_8437	chr7	118974239	118975139	9.83675	-	118974239	118975139	0	1	900	0	677	11348	895	10476	5.04045	3.90906	-1.03908	9.59632e-05	0.00109356	ENSMUST00000008878	Gprc5b	UTR3
16709	peak_16709	chr17	33916972	33919147	9.83675	+	33916972	33919147	0	1	2175	0	1301	27042	1567	24115	4.6919	3.55062	-1.05459	9.5879e-05	0.00109356	ENSMUST00000053429	Zbtb22	LastExon
17365	peak_17365	chr17	84441804	84444209	9.83675	-	84441804	84444209	0	2	8392	0,2013	236	1895	261	1056	4.26035	2.77918	-1.33841	9.58594e-05	0.00109356	ENSMUST00000234313	Thada	UTR3
1768	peak_1768	chr2	150830549	150830899	9.82714	+	150830549	150830899	0	1	350	0	511	4918	518	3180	3.98576	2.66568	-1.19873	9.6745e-05	0.00110087	ENSMUST00000045441	Pygb	UTR3
9523	peak_9523	chr8	106200687	106200912	9.82714	-	106200687	106200912	0	1	225	0	126	844	158	542	3.97306	2.58441	-1.25935	9.67938e-05	0.00110087	ENSMUST00000212150	Slc7a6os	UTR3
16991	peak_16991	chr17	23575844	23577019	9.82714	-	23575844	23577019	0	1	1175	0	648	8402	660	6034	3.77328	2.55175	-1.12475	9.66864e-05	0.00110087	ENSMUST00000057029	Zfp13	UTR3
5751	peak_5751	chr5	25284265	25284990	9.82578	-	25284265	25284990	0	1	725	0	801	12666	856	8840	5.12277	3.95801	-1.06934	9.70009e-05	0.00110191	ENSMUST00000045291	Kmt2c	Exon
16862	peak_16862	chr17	65841077	65841602	9.82578	+	65841077	65841602	0	1	525	0	399	4007	458	2642	4.55282	3.30286	-1.13963	9.70023e-05	0.00110191	ENSMUST00000162109	Ppp4r1	UTR3
8704	peak_8704	chr8	25573794	25574369	9.82461	+	25573794	25574369	0	1	575	0	786	18935	877	14986	4.95244	3.75462	-1.09573	9.71392e-05	0.0011028	ENSMUST00000120106	Fgfr1	UTR5
295	peak_295	chr1	106392364	106393564	9.82455	+	106392364	106393564	0	1	1200	0	741	20204	747	13539	5.73685	4.51724	-1.11399	9.7276e-05	0.00110285	ENSMUST00000061047	Phlpp1	LastExon
4877	peak_4877	chr4	143267980	143268205	9.82455	-	143267980	143268205	0	1	225	0	91	696	192	618	4.18781	2.58067	-1.43413	9.73771e-05	0.00110285	ENSMUST00000030317	Pdpn	UTR3
17351	peak_17351	chr17	80397801	80399744	9.82455	-	80397801	80399744	0	2	871,4	0,1939	700	11926	765	8895	5.31267	4.30025	-0.93822	9.73299e-05	0.00110285	ENSMUST00000068714	Sos1	UTR3
18602	peak_18602	chr19	43847966	43850263	9.82455	-	43847966	43850263	0	2	312488	0,1809	198	6780	249	5464	5.71746	4.37776	-1.21552	9.72394e-05	0.00110285	ENSMUST00000026209	Dnmbp	Exon
16708	peak_16708	chr17	33913497	33913597	9.82442	+	33913497	33913597	0	1	100	0	333	1301	452	1194	2.50482	1.26753	-1.13038	9.74444e-05	0.00110295	ENSMUST00000174646	Daxx	UTR5
19039	peak_19039	chrX	73794958	73795258	9.81985	-	73794958	73795258	0	1	300	0	486	3354	482	2115	3.00283	1.65525	-1.21743	9.78125e-05	0.00110645	ENSMUST00000114438	Pdzd4	LastExon
11226	peak_11226	chr10	127743564	127744039	9.81643	+	127743564	127744039	0	1	475	0	184	5683	208	4150	5.86113	4.58224	-1.16496	9.81033e-05	0.00110907	ENSMUST00000054287	Zbtb39	LastExon
4196	peak_4196	chr4	136541465	136542915	9.8103	+	136541465	136542915	0	1	1450	0	1032	11902	1398	10027	4.73859	3.55162	-1.08609	9.86145e-05	0.00111379	ENSMUST00000001116	Luzp1	Exon
11231	peak_11231	chr10	128252501	128252941	9.8103	+	128252501	128252941	0	1	440	0	295	4195	313	2585	5.07883	3.89616	-1.08256	9.8639e-05	0.00111379	ENSMUST00000105245	Timeless	UTR3
2400	peak_2400	chr2	121204986	121207798	9.80775	-	121204986	121207798	0	2	125100	0,2712	1245	3697	1231	2645	2.73672	1.74559	-0.920042	9.8873e-05	0.00111577	ENSMUST00000147540	Trp53bp1	UTR3
18502	peak_18502	chr19	7094238	7097163	9.80658	-	7094238	7097163	0	1	2925	0	1560	34149	1579	24883	5.07132	3.91614	-1.05953	9.90123e-05	0.00111667	ENSMUST00000113383	Flrt1	UTR3
8993	peak_8993	chr8	106128023	106128273	9.80115	+	106128023	106128273	0	1	250	0	112	1741	169	1350	5.15493	3.68785	-1.32096	9.94452e-05	0.00112088	ENSMUST00000211991	Nfatc3	UTR3
7118	peak_7118	chr6	122323257	122323582	9.79964	-	122323257	122323582	0	1	325	0	857	7626	936	6548	3.57873	2.52053	-0.980618	9.96683e-05	0.00112206	ENSMUST00000161877	Phc1	UTR3
9560	peak_9560	chr8	111713613	111714413	9.79964	-	111713613	111714413	0	1	800	0	808	10595	963	10501	3.71603	2.7082	-0.934153	9.96464e-05	0.00112206	ENSMUST00000212349	Bcar1	Exon
4641	peak_4641	chr4	118225046	118226318	9.79898	-	118225046	118226318	0	2	80520	0,752	1825	19564	1837	15983	3.84495	2.82534	-0.93528	9.97736e-05	0.00112257	ENSMUST00000124758	Ptprf	Exon
5083	peak_5083	chr5	30896225	30896425	9.79263	+	30896225	30896425	0	1	200	0	88	668	90	312	4.02178	2.32285	-1.51304	0.000100341	0.00112752	ENSMUST00000069705	Agbl5	UTR3
6014	peak_6014	chr5	113842635	113842860	9.79263	-	113842635	113842860	0	1	225	0	1412	4653	1585	3903	2.7264	1.69063	-0.956417	0.000100314	0.00112752	ENSMUST00000004646	Coro1c	UTR3
7466	peak_7466	chr7	43677098	43677298	9.79263	+	43677098	43677298	0	1	200	0	57	630	84	394	3.86528	1.95566	-1.68693	0.000100393	0.00112752	ENSMUST00000038332	Ctu1	LastExon
8760	peak_8760	chr8	45795058	45795433	9.79136	+	45795058	45795433	0	1	375	0	691	4344	555	2455	3.72522	2.61377	-1.02235	0.000100541	0.00112851	ENSMUST00000138049	Sorbs2	LastExon
5114	peak_5114	chr5	33843213	33843463	9.78652	+	33843213	33843463	0	1	250	0	1177	4512	1203	2943	3.16912	2.23392	-0.871778	0.000101028	0.00113231	ENSMUST00000141416	Nsd2	Exon
9090	peak_9090	chr8	119956934	119957134	9.78652	+	119956934	119957134	0	1	200	0	239	2394	342	1911	4.42838	2.95591	-1.32516	0.000101059	0.00113231	ENSMUST00000108988	Usp10	UTR3
18576	peak_18576	chr19	34827248	34840831	9.78652	-	34827248	34840831	0	2	125,75	0,13508	64	705	94	378	4.52501	2.50493	-1.77888	0.000100983	0.00113231	ENSMUST00000238065	Pank1	Exon
2125	peak_2125	chr2	30823671	30824146	9.78108	-	30823671	30824146	0	1	475	0	118	2047	149	1453	4.42889	2.89208	-1.37926	0.000101543	0.00113658	ENSMUST00000041726	Asb6	UTR3
16550	peak_16550	chr17	15768738	15770889	9.78108	+	15768738	15770889	0	2	38912	0,1239	939	19406	967	11199	5.62105	4.43731	-1.08323	0.000101561	0.00113658	ENSMUST00000024627	Chd1	LastExon
3917	peak_3917	chr4	63134881	63136331	9.77592	+	63134881	63136331	0	1	1450	0	403	4525	634	4705	4.51559	3.30463	-1.10683	0.000101985	0.00114065	ENSMUST00000107415	Zfp618	UTR3
18459	peak_18459	chr19	4803515	4803990	9.77484	-	4803515	4803990	0	1	475	0	1448	16207	1309	9983	3.66481	2.38957	-1.16044	0.000102123	0.00114151	ENSMUST00000113793	Rbm14	LastExon
4964	peak_4964	chr4	155156599	155157324	9.77368	-	155156599	155157324	0	1	725	0	985	22995	1048	18015	5.00503	3.85047	-1.05908	0.000102326	0.00114243	ENSMUST00000030917	Ski	UTR3
18616	peak_18616	chr19	46032667	46033242	9.77368	-	46032667	46033242	0	1	575	0	3003	24134	3044	22112	3.53699	2.68175	-0.80251	0.000102319	0.00114243	ENSMUST00000026252	Ldb1	UTR3
5195	peak_5195	chr5	65790178	65790678	9.77319	+	65790178	65790678	0	1	500	0	381	4240	417	2757	4.70915	3.48232	-1.11944	0.000102482	0.00114282	ENSMUST00000087264	N4bp2	Exon
8542	peak_8542	chr7	130266212	132987711	9.77319	-	130266212	132987711	0	2	51149	0,2721350	200	1098	208	647	3.44049	1.95985	-1.33196	0.000102457	0.00114282	ENSMUST00000033269	Ctbp2	UTR3
4211	peak_4211	chr4	138439765	138439990	9.7706	+	138439765	138439990	0	1	225	0	21	921	41	649	5.9095	3.72323	-1.91527	0.00010277	0.00114487	ENSMUST00000105813	Mul1	UTR3
7619	peak_7619	chr7	82869910	82870785	9.7706	+	82869910	82870785	0	1	875	0	1124	11233	1170	8339	4.44483	3.40836	-0.958335	0.000102806	0.00114487	ENSMUST00000082237	Mex3b	LastExon
8285	peak_8285	chr7	80319248	80319348	9.7706	-	80319248	80319348	0	1	100	0	154	885	204	587	3.48412	1.84201	-1.46646	0.000102848	0.00114487	ENSMUST00000148001	Rccd1	UTR3
1667	peak_1667	chr2	121306628	121307545	9.7658	+	121306628	121307545	0	2	744,31	0,886	343	4283	508	4689	3.81114	2.65438	-1.06058	0.000103584	0.00114869	ENSMUST00000110639	Map1a	Exon
7539	peak_7539	chr7	62380278	62380603	9.7658	+	62380278	62380603	0	1	325	0	39	1215	72	786	5.61005	3.3806	-1.95096	0.00010331	0.00114869	ENSMUST00000080403	Magel2	LastExon
9361	peak_9361	chr8	70331971	70332196	9.7658	-	70331971	70332196	0	1	225	0	351	2604	336	1601	3.96383	2.74025	-1.11644	0.000103594	0.00114869	ENSMUST00000075666	Upf1	UTR3
9474	peak_9474	chr8	90247639	90248489	9.7658	-	90247639	90248489	0	1	850	0	823	24417	768	14819	6.13308	5.13012	-0.929004	0.000103534	0.00114869	ENSMUST00000109621	Tox3	UTR3
11505	peak_11505	chr10	80834531	80834656	9.7658	-	80834531	80834656	0	1	125	0	2	234	26	194	6.67957	1.94767	-4.07609	0.000103617	0.00114869	ENSMUST00000053986	Lingo3	LastExon
15270	peak_15270	chr15	75947289	75949214	9.7658	+	75947289	75949214	0	1	1925	0	929	12693	1130	9527	4.92813	3.69813	-1.12586	0.000103571	0.00114869	ENSMUST00000037260	Zfp623	LastExon
18155	peak_18155	chr19	8890600	8890740	9.7658	+	8890600	8890740	0	1	140	0	308	2015	367	1377	3.91837	2.67601	-1.13161	0.000103523	0.00114869	ENSMUST00000096251	1810009A15Rik	UTR3
1959	peak_1959	chr2	181380007	181380207	9.76563	+	181380007	181380207	0	1	200	0	481	2248	472	1613	2.71011	1.54723	-1.06559	0.000103752	0.00114882	ENSMUST00000131284	Zgpat	UTR5
11841	peak_11841	chr11	51976826	51977176	9.76563	+	51976826	51977176	0	1	350	0	286	1785	293	1207	3.57481	2.32258	-1.14108	0.000103711	0.00114882	ENSMUST00000102763	Cdkn2aipnl	UTR3
16496	peak_16496	chr17	3196936	3198511	9.76396	+	3196936	3198511	0	1	1575	0	2191	73868	2180	48402	6.30054	5.24031	-0.978354	0.000103933	0.00115015	ENSMUST00000076734	Scaf8	LastExon
494	peak_494	chr1	179627094	179627269	9.76251	+	179627094	179627269	0	1	175	0	22	347	48	166	5.06961	2.40602	-2.31229	0.000104148	0.00115131	ENSMUST00000040706	Cnst	UTR3
9071	peak_9071	chr8	113642872	113643122	9.76251	+	113642872	113643122	0	1	250	0	67	1226	98	744	5.29604	3.46229	-1.62487	0.000104159	0.00115131	ENSMUST00000035777	Mon1b	UTR3
3055	peak_3055	chr3	95006138	95006313	9.757	+	95006138	95006313	0	1	175	0	141	1655	177	1225	4.63526	3.29482	-1.21377	0.000104644	0.00115571	ENSMUST00000125476	Pi4kb	UTR3
8901	peak_8901	chr8	83664198	83664698	9.757	+	83664198	83664698	0	1	500	0	581	3714	710	3082	3.25413	2.01155	-1.13347	0.000104742	0.00115571	ENSMUST00000019577	Gipc1	LastExon
10448	peak_10448	chr9	57253171	57254121	9.757	-	57253171	57254121	0	1	950	0	98	4701	162	4392	6.43204	4.9644	-1.31838	0.000104735	0.00115571	ENSMUST00000215298	1700017B05Rik	UTR3
7242	peak_7242	chr7	12492505	12494455	9.75667	+	12492505	12494455	0	1	1950	0	1041	20779	1162	14021	5.48848	4.56792	-0.859141	0.000104888	0.00115598	ENSMUST00000151933	Zfp606	UTR3
7917	peak_7917	chr7	5007506	5008081	9.75667	-	5007506	5008081	0	1	575	0	429	6124	486	4706	4.88352	3.72071	-1.06694	0.000104853	0.00115598	ENSMUST00000207030	Fiz1	UTR3
8027	peak_8027	chr7	25244160	25245260	9.75558	-	25244160	25245260	0	1	1100	0	1374	16332	1683	15006	3.32642	2.21057	-1.02664	0.000105029	0.00115685	ENSMUST00000045847	Erf	UTR3
16118	peak_16118	chr16	43618622	43618997	9.75422	+	43618622	43618997	0	1	375	0	231	4254	290	2892	5.37089	3.94921	-1.27971	0.00010519	0.00115795	ENSMUST00000114695	Zbtb20	LastExon
6254	peak_6254	chr5	143090313	143090488	9.75285	-	143090313	143090488	0	1	175	0	284	1360	359	961	3.26053	1.83592	-1.28472	0.00010536	0.00115904	ENSMUST00000198179	Rnf216	UTR3
12092	peak_12092	chr11	78022515	78024843	9.75285	+	78022515	78024843	0	3	1,793,31	0,511,2297	838	16036	838	11514	4.87729	3.72304	-1.05885	0.000105412	0.00115904	ENSMUST00000153428	Phf12	Exon
1574	peak_1574	chr2	117177345	117177895	9.75259	+	117177345	117177895	0	1	550	0	362	11163	466	8525	6.18204	4.99671	-1.08116	0.000105493	0.00115925	ENSMUST00000028829	Spred1	LastExon
302	peak_302	chr1	118419525	118459857	9.74734	+	118419525	118459857	0	2	393,57	0,40275	1192	9983	1076	5900	4.11583	2.92928	-1.08522	0.000105939	0.00116348	ENSMUST00000186349	Clasp1	UTR5
363	peak_363	chr1	134630492	134630892	9.74196	+	134630492	134630892	0	1	400	0	1293	12017	1334	8489	4.35009	3.25741	-1.00446	0.000106459	0.00116782	ENSMUST00000112198	Kdm5b	LastExon
12941	peak_12941	chr11	102290999	102291674	9.74196	-	102290999	102291674	0	1	675	0	752	26502	725	16068	5.36941	4.02219	-1.23007	0.000106403	0.00116782	ENSMUST00000107132	Atxn7l3	UTR3
10056	peak_10056	chr9	108051468	108051893	9.73783	+	108051468	108051893	0	1	425	0	101	2844	144	2188	5.5037	3.95008	-1.38817	0.000106826	0.00117117	ENSMUST00000047746	Rnf123	UTR3
8921	peak_8921	chr8	85029994	85030285	9.73546	+	85029994	85030285	0	1	291	0	495	3213	641	2488	3.82185	2.50948	-1.19146	0.000107064	0.0011731	ENSMUST00000047281	Trir	UTR3
5294	peak_5294	chr5	104521902	104522377	9.73472	+	104521902	104522377	0	1	475	0	479	7634	714	6533	5.18411	4.15837	-0.948448	0.000107223	0.0011737	ENSMUST00000096452	BC005561	LastExon
16787	peak_16787	chr17	45566993	45567368	9.73472	+	45566993	45567368	0	1	375	0	266	1517	368	1391	3.13797	1.85339	-1.16779	0.000107243	0.0011737	ENSMUST00000224559	Slc35b2	UTR5
10800	peak_10800	chr10	13131155	13131455	9.73239	+	13131155	13131455	0	1	300	0	464	2673	441	1206	3.66772	2.41823	-1.13802	0.000107541	0.0011756	ENSMUST00000121646	Plagl1	UTR3
13635	peak_13635	chr12	79280515	79280840	9.73239	-	79280515	79280840	0	1	325	0	76	1268	113	917	4.60469	2.88056	-1.53457	0.000107529	0.0011756	ENSMUST00000219842	Zfyve26	UTR3
16437	peak_16437	chr16	78546507	78547839	9.73068	-	78546507	78547839	0	2	61264	0,1068	49	1088	92	684	5.63569	3.54692	-1.83208	0.000107731	0.00117699	ENSMUST00000231272	D16Ertd472e	LastExon
16172	peak_16172	chr16	87503576	87503901	9.73047	+	87503576	87503901	0	1	325	0	37	1354	42	477	6.42214	4.2891	-1.87033	0.000107809	0.00117716	ENSMUST00000175717	B130034C11Rik	UTR5
6038	peak_6038	chr5	115298509	115298759	9.72945	-	115298509	115298759	0	1	250	0	1809	26202	2049	17754	5.0886	4.0516	-0.95727	0.000108	0.001178	ENSMUST00000112090	Dynll1	UTR3
18944	peak_18944	chrX	164423175	164423350	9.72945	+	164423175	164423350	0	1	175	0	13	355	30	171	5.98153	3.45217	-2.1994	0.00010801	0.001178	ENSMUST00000112255	Piga	Exon
6828	peak_6828	chr6	38127934	38128409	9.72787	-	38127934	38128409	0	1	475	0	435	3800	484	2384	4.09919	2.65325	-1.30176	0.000108314	0.00117929	ENSMUST00000144973	D630045J12Rik	UTR3
6885	peak_6885	chr6	56781835	56789537	9.72787	-	56781835	56789537	0	2	131319	0,7383	320	3067	476	2132	4.5114	3.07353	-1.29905	0.000108317	0.00117929	ENSMUST00000114321	Kbtbd2	Exon
17053	peak_17053	chr17	25989810	25990560	9.72787	-	25989810	25990560	0	1	750	0	1080	6780	1003	4630	3.47391	2.37663	-1.0073	0.000108246	0.00117929	ENSMUST00000120691	Rab11fip3	UTR3
9332	peak_9332	chr8	69134893	69138635	9.72778	-	69134893	69138635	0	2	1266284	0,3458	2755	41138	2080	19691	4.57475	3.26828	-1.18566	0.000108386	0.00117936	ENSMUST00000185176	Lzts1	UTR3
14635	peak_14635	chr14	47289800	47290925	9.72614	+	47289800	47290925	0	1	1125	0	655	12155	783	7861	5.47847	4.19006	-1.17195	0.000108572	0.0011807	ENSMUST00000065562	Socs4	LastExon
12524	peak_12524	chr11	23655447	23655722	9.72356	-	23655447	23655722	0	1	275	0	179	5743	243	4209	6.24974	4.99458	-1.14073	0.000108829	0.00118281	ENSMUST00000020523	Pex13	Exon
18581	peak_18581	chr19	38789277	38789602	9.72324	-	38789277	38789602	0	1	325	0	107	1012	119	550	4.46838	3.03659	-1.29509	0.000108915	0.00118307	ENSMUST00000025963	Noc3l	UTR3
16057	peak_16057	chr16	33496458	33497708	9.72084	+	33496458	33497708	0	1	1250	0	1337	42108	1333	26287	6.2224	5.15322	-0.985421	0.00010916	0.00118505	ENSMUST00000089677	Zfp148	LastExon
13961	peak_13961	chr13	54512418	54524790	9.7195	+	54512418	54524790	0	2	54821	0,11551	444	6047	488	4622	4.99386	3.98578	-0.934605	0.000109324	0.00118615	ENSMUST00000121401	Simc1	Exon
3991	peak_3991	chr4	107049137	107049537	9.71916	+	107049137	107049537	0	1	400	0	817	6359	708	4157	4.1144	3.1618	-0.882691	0.000109462	0.00118642	ENSMUST00000030367	Ssbp3	UTR3
7855	peak_7855	chr7	132949754	132966650	9.71916	+	132949754	132966650	0	2	681144	0,16752	966	30169	1091	22019	6.21656	5.20868	-0.933189	0.000109558	0.00118642	ENSMUST00000033265	Zranb1	Exon
13625	peak_13625	chr12	76348981	76350131	9.71916	-	76348981	76350131	0	1	1150	0	520	7722	581	5033	5.1331	3.91255	-1.11351	0.000109553	0.00118642	ENSMUST00000176278	Zbtb25	UTR3
17158	peak_17158	chr17	35156042	35157117	9.71916	-	35156042	35157117	0	1	1075	0	6420	63940	6267	55819	3.52006	2.63014	-0.832155	0.000109601	0.00118642	ENSMUST00000174805	Prrc2a	Exon
6167	peak_6167	chr5	135053081	135053256	9.71906	-	135053081	135053256	0	1	175	0	233	1156	311	821	3.46544	2.01224	-1.30772	0.000109817	0.00118651	ENSMUST00000071677	Bud23	UTR3
10787	peak_10787	chr10	7712583	7713083	9.71906	+	7712583	7713083	0	1	500	0	381	6151	449	4012	5.25716	4.08542	-1.0721	0.00010985	0.00118651	ENSMUST00000217931	Lats1	LastExon
12731	peak_12731	chr11	71031965	71032340	9.71906	-	71031965	71032340	0	1	375	0	1547	19910	1495	11304	4.93057	3.77928	-1.0563	0.000109771	0.00118651	ENSMUST00000156068	6330403K07Rik	UTR3
16038	peak_16038	chr16	32298622	32299372	9.71906	+	32298622	32299372	0	1	750	0	491	15171	605	9824	6.17316	4.96048	-1.10637	0.000109861	0.00118651	ENSMUST00000171474	Rnf168	LastExon
5986	peak_5986	chr5	110740234	110756039	9.71892	-	110740234	110756039	0	4	55,91,111,643	0,1735,13569,15162	1783	30308	1731	20600	4.96239	3.80402	-1.06137	0.000109998	0.00118663	ENSMUST00000112433	Ep400	Exon
18531	peak_18531	chr19	12501081	12501381	9.71892	-	12501081	12501381	0	1	300	0	141	1798	304	2248	3.05702	1.62653	-1.28988	0.000109946	0.00118663	ENSMUST00000045521	Dtx4	Exon
6530	peak_6530	chr6	86368827	86369252	9.71759	+	86368827	86369252	0	1	425	0	1157	15889	1306	9496	5.02752	3.71256	-1.19076	0.000110162	0.00118772	ENSMUST00000071492	Fam136a	LastExon
8544	peak_8544	chr7	131343367	131343792	9.7144	-	131343367	131343792	0	1	425	0	88	2997	129	2226	6.33613	4.97402	-1.23116	0.000110469	0.00119035	ENSMUST00000207117	2310057M21Rik	UTR3
15094	peak_15094	chr14	75897161	75897636	9.71412	-	75897161	75897636	0	1	475	0	561	5346	532	2767	4.4882	3.26404	-1.11642	0.000110553	0.00119058	ENSMUST00000088922	Gtf2f2	UTR3
2323	peak_2323	chr2	103721530	103721855	9.7129	-	103721530	103721855	0	1	325	0	363	2845	358	1741	3.81452	2.48745	-1.20245	0.00011071	0.00119159	ENSMUST00000132135	Nat10	UTR3
6469	peak_6469	chr6	63256625	63256800	9.70307	+	63256625	63256800	0	1	175	0	10	309	32	188	5.96074	2.8968	-2.63825	0.000111658	0.00119973	ENSMUST00000203667	9330118I20Rik	UTR3
18818	peak_18818	chrX	99821345	99845432	9.70307	+	99821345	99845432	0	2	581,44	0,24043	47	4814	80	3586	6.65786	4.71575	-1.71031	0.000111535	0.00119973	ENSMUST00000096363	Tmem28	Exon
18830	peak_18830	chrX	101319589	101321239	9.70307	+	101319589	101321239	0	1	1650	0	875	34024	1030	26601	6.23765	5.03393	-1.09932	0.000111629	0.00119973	ENSMUST00000113671	Gm21986	UTR5
19138	peak_19138	chrX	134538080	134538230	9.6982	-	134538080	134538230	0	1	150	0	94	764	156	444	4.2695	2.21829	-1.80074	0.000112099	0.00120379	ENSMUST00000054213	Timm8a1	UTR3
2658	peak_2658	chr2	165381463	165381738	9.69804	-	165381463	165381738	0	1	275	0	467	3073	483	2004	3.84807	2.6023	-1.13506	0.000112394	0.00120392	ENSMUST00000103084	Zfp334	LastExon
12901	peak_12901	chr11	98002932	98003257	9.69804	-	98002932	98003257	0	1	325	0	337	3982	393	2895	3.3711	2.00164	-1.23767	0.000112389	0.00120392	ENSMUST00000103144	Cacnb1	LastExon
15640	peak_15640	chr15	76070183	76070283	9.69804	-	76070183	76070283	0	1	100	0	312	1809	416	1430	3.47906	2.08306	-1.26096	0.000112268	0.00120392	ENSMUST00000002599	Puf60	UTR3
17457	peak_17457	chr18	32269991	32270091	9.69804	+	32269991	32270091	0	1	100	0	25	301	61	176	4.77954	2.485	-2.00086	0.000112215	0.00120392	ENSMUST00000025241	Ercc3	UTR3
19071	peak_19071	chrX	95425017	95425792	9.69804	-	95425017	95425792	0	1	775	0	176	2034	217	1474	4.41871	3.00129	-1.27838	0.000112431	0.00120392	ENSMUST00000084535	Amer1	UTR3
18348	peak_18348	chr19	45007357	45007707	9.69673	+	45007357	45007707	0	1	350	0	130	2679	196	2471	5.14093	3.74296	-1.26082	0.000112597	0.00120502	ENSMUST00000026227	Twnk	Exon
4939	peak_4939	chr4	151982963	151983238	9.69673	-	151982963	151983238	0	1	275	0	125	1647	163	1092	3.86178	2.17211	-1.50297	0.000112661	0.00120502	ENSMUST00000105665	Thap3	UTR3
4640	peak_4640	chr4	118137956	118138231	9.6915	-	118137956	118138231	0	1	275	0	579	7289	558	4410	4.29641	2.96212	-1.20683	0.000113134	0.0012094	ENSMUST00000106403	Kdm4a	UTR3
15537	peak_15537	chr15	39878110	39878660	9.6889	-	39878110	39878660	0	1	550	0	374	10019	420	7401	5.93745	4.79916	-1.0441	0.000113402	0.00121157	ENSMUST00000228575	Lrp12	UTR3
3770	peak_3770	chr4	25007295	25007645	9.68801	+	25007295	25007645	0	1	350	0	46	813	55	343	5.31802	3.29449	-1.77749	0.000113546	0.00121232	ENSMUST00000038920	Gpr63	LastExon
7339	peak_7339	chr7	25081656	25082431	9.68801	+	25081656	25082431	0	1	775	0	448	6385	570	5403	4.27916	2.98538	-1.17534	0.000113721	0.00121232	ENSMUST00000053410	Zfp574	LastExon
8949	peak_8949	chr8	94622882	94623457	9.68801	+	94622882	94623457	0	1	575	0	381	12955	422	8004	6.32271	5.03456	-1.17243	0.000113742	0.00121232	ENSMUST00000211983	Rspry1	UTR5
12077	peak_12077	chr11	77457901	77458126	9.68801	+	77457901	77458126	0	1	225	0	123	1571	159	993	4.90134	3.4786	-1.2811	0.000113794	0.00121232	ENSMUST00000037912	Ssh2	UTR3
12240	peak_12240	chr11	98822890	98828630	9.68801	+	98822890	98828630	0	3	509,65,76	0,4681,5664	697	5559	694	3763	3.74143	2.51996	-1.11328	0.000113628	0.00121232	ENSMUST00000169695	Casc3	Exon
3518	peak_3518	chr3	95254773	95258072	9.6862	-	95254773	95258072	0	2	654,46	0,3253	383	5026	423	3340	4.76151	3.42066	-1.21389	0.000114066	0.00121385	ENSMUST00000015855	Prune1	UTR3
12127	peak_12127	chr11	82783376	82785391	9.6862	+	82783376	82785391	0	2	523,77	0,1938	1056	16757	1148	10236	4.94899	3.52843	-1.27979	0.000114037	0.00121385	ENSMUST00000172609	Lig3	UTR5
9402	peak_9402	chr8	78505845	78506245	9.68174	-	78505845	78506245	0	1	400	0	1714	10270	2244	8518	3.73719	2.50223	-1.12606	0.000114484	0.00121761	ENSMUST00000211719	Rbmxl1	LastExon
6679	peak_6679	chr6	127491546	127491921	9.68134	+	127491546	127491921	0	1	375	0	421	2746	430	1519	3.95736	2.69626	-1.14679	0.00011464	0.00121795	ENSMUST00000039680	Parp11	LastExon
15858	peak_15858	chr15	99427435	99427735	9.68134	-	99427435	99427735	0	1	300	0	94	1336	181	1522	3.69886	2.17623	-1.36407	0.000114709	0.00121795	ENSMUST00000023747	Nckap5l	Exon
18724	peak_18724	chrX	47964557	47964907	9.68134	+	47964557	47964907	0	1	350	0	76	1560	101	762	5.59544	3.70431	-1.66818	0.000114708	0.00121795	ENSMUST00000115013	Ocrl	UTR3
13263	peak_13263	chr12	72573704	72574479	9.67851	+	72573704	72574479	0	1	775	0	208	3564	284	2434	5.34492	3.9636	-1.24858	0.000114999	0.00122034	ENSMUST00000044352	Pcnx4	Exon
7819	peak_7819	chr7	127767630	127768393	9.67413	+	127767630	127768393	0	2	33642	0,121	930	10806	983	9081	3.84925	2.78813	-0.978379	0.000115413	0.00122404	ENSMUST00000206893	Fbxl19	LastExon
17581	peak_17581	chr18	37489639	37490189	9.67329	+	37489639	37490189	0	1	550	0	22	497	77	511	5.72048	3.53511	-1.91001	0.000115546	0.00122476	ENSMUST00000055949	Pcdhb18	LastExon
12467	peak_12467	chr11	5280698	5282373	9.67322	-	5280698	5282373	0	1	1675	0	367	13246	467	10071	5.55915	4.09976	-1.31237	0.000115616	0.00122481	ENSMUST00000172492	Znrf3	UTR3
8733	peak_8733	chr8	34807346	34808096	9.67188	+	34807346	34808096	0	1	750	0	934	9748	958	7042	3.20541	1.98626	-1.12201	0.000115788	0.00122595	ENSMUST00000033930	Dusp4	UTR5
18932	peak_18932	chrX	153499956	153500406	9.67167	+	153499956	153500406	0	1	450	0	1056	10620	1192	9529	4.31895	3.36961	-0.882721	0.00011587	0.00122613	ENSMUST00000060714	Ubqln2	LastExon
6036	peak_6036	chr5	115147705	115148005	9.66961	-	115147705	115148005	0	1	300	0	662	3354	762	2611	3.33131	2.13058	-1.09598	0.000116101	0.00122788	ENSMUST00000112121	Mlec	UTR3
6655	peak_6655	chr6	121193793	121194043	9.66913	+	121193793	121194043	0	1	250	0	17	423	67	497	5.4938	3.12232	-2.06463	0.000116335	0.00122829	ENSMUST00000120066	Pex26	UTR3
14119	peak_14119	chr13	114154772	114155597	9.66913	+	114154772	114155597	0	1	825	0	343	4735	403	3184	5.04548	3.82262	-1.11417	0.000116252	0.00122829	ENSMUST00000224858	Arl15	UTR3
14265	peak_14265	chr13	55346707	55346782	9.66913	-	55346707	55346782	0	1	75	0	78	543	124	327	4.01427	2.18759	-1.61482	0.000116298	0.00122829	ENSMUST00000224517	Lman2	UTR3
16661	peak_16661	chr17	28747893	28748318	9.66759	+	28747893	28748318	0	1	425	0	179	1364	204	712	4.16709	2.59589	-1.40565	0.000116525	0.00122961	ENSMUST00000114752	Mapk14	UTR3
1088	peak_1088	chr1	172053391	172054216	9.66314	-	172053391	172054216	0	1	825	0	552	8117	475	3781	4.19876	2.60234	-1.42521	0.00011695	0.0012334	ENSMUST00000059794	Nhlh1	UTR3
13580	peak_13580	chr12	69189861	69190186	9.66286	-	69189861	69190186	0	1	325	0	227	3471	319	2054	5.07556	3.64561	-1.28785	0.000117038	0.00123365	ENSMUST00000222699	Gm49384	UTR3
7738	peak_7738	chr7	112092790	112101866	9.66252	+	112092790	112101866	0	2	696129	0,8947	2381	85566	2575	61741	6.40074	5.35274	-0.966698	0.000117131	0.00123394	ENSMUST00000210526	Usp47	UTR5
6578	peak_6578	chr6	100865978	100866801	9.66194	+	100865978	100866801	0	2	105545	0,278	2730	86380	2949	56159	6.23041	5.08547	-1.04871	0.000117243	0.00123443	ENSMUST00000203067	Ppp4r2	UTR5
825	peak_825	chr1	118835231	118836381	9.66122	-	118835231	118836381	0	1	1150	0	569	14523	565	10350	5.48518	4.33781	-1.05131	0.000117433	0.00123505	ENSMUST00000062483	Gli2	UTR3
6710	peak_6710	chr6	140543855	140544180	9.66122	+	140543855	140544180	0	1	325	0	366	1989	390	1283	3.6588	2.429	-1.12104	0.000117418	0.00123505	ENSMUST00000204145	Plekha5	UTR3
2584	peak_2584	chr2	156311846	156312296	9.66067	-	156311846	156312296	0	1	450	0	1068	10935	1453	12139	2.80834	1.8585	-0.886422	0.000117619	0.00123552	ENSMUST00000079125	Scand1	UTR3
5562	peak_5562	chr5	137527672	137527747	9.66067	+	137527672	137527747	0	1	75	0	113	925	135	536	3.0648	1.27411	-1.58729	0.000117613	0.00123552	ENSMUST00000031727	Gigyf1	UTR3
5632	peak_5632	chr5	143563697	143564497	9.66067	+	143563697	143564497	0	1	800	0	479	8388	544	5996	5.36068	4.29933	-0.97764	0.00011774	0.00123552	ENSMUST00000196487	Fam220a	UTR3
15672	peak_15672	chr15	76736566	76736641	9.66067	-	76736566	76736641	0	1	75	0	98	635	121	440	3.07945	1.44864	-1.45393	0.000117677	0.00123552	ENSMUST00000177011	Arhgap39	UTR3
8748	peak_8748	chr8	44950207	44952132	9.65812	+	44950207	44952132	0	1	1925	0	3183	39012	4374	37584	4.63532	3.48453	-1.05369	0.00011808	0.00123771	ENSMUST00000098796	Fat1	UTR5
15238	peak_15238	chr15	58873098	58874148	9.65812	+	58873098	58874148	0	1	1050	0	134	3700	165	2580	5.87209	4.47176	-1.26505	0.00011806	0.00123771	ENSMUST00000036937	Trmt12	LastExon
1333	peak_1333	chr2	31214404	31214704	9.65554	+	31214404	31214704	0	1	300	0	242	5029	279	3699	4.94651	3.58737	-1.22931	0.000118371	0.00123992	ENSMUST00000056433	Gpr107	UTR3
2236	peak_2236	chr2	70713281	70714031	9.65554	-	70713281	70714031	0	1	750	0	578	19474	631	13089	6.32563	5.26338	-0.978059	0.000118488	0.00123992	ENSMUST00000135128	Tlk1	UTR3
3987	peak_3987	chr4	106653488	106654738	9.65554	+	106653488	106654738	0	1	1250	0	173	6946	198	4809	6.10697	4.73697	-1.23747	0.000118479	0.00123992	ENSMUST00000058905	Pars2	LastExon
1835	peak_1835	chr2	156551247	156555849	9.65387	+	156551247	156555849	0	2	202,23	0,4579	173	2084	218	1465	3.98049	2.43113	-1.3858	0.000118757	0.00124135	ENSMUST00000029158	Aar2	Exon
15149	peak_15149	chr14	118234381	118234881	9.65387	-	118234381	118234881	0	1	500	0	552	5891	565	4252	3.6082	2.37668	-1.12338	0.000118704	0.00124135	ENSMUST00000170662	Sox21	UTR3
546	peak_546	chr1	194620228	194644616	9.64224	+	194620228	194644616	0	2	169931	0,23457	4924	94571	3248	40942	5.00002	3.75658	-1.1314	0.000119943	0.0012514	ENSMUST00000027952	Plxna2	UTR5
5714	peak_5714	chr5	8397172	8397972	9.64224	-	8397172	8397972	0	1	800	0	1067	32009	1285	21456	6.16346	4.92903	-1.12716	0.000119984	0.0012514	ENSMUST00000168500	Dbf4	UTR3
11488	peak_11488	chr10	80380904	80382404	9.64224	-	80380904	80382404	0	1	1500	0	2258	61216	2332	53285	4.75281	3.78519	-0.894225	0.000119946	0.0012514	ENSMUST00000123141	Mex3d	UTR3
12417	peak_12417	chr11	120488358	120488833	9.64224	+	120488358	120488833	0	1	475	0	652	8667	722	5475	4.53144	3.06774	-1.31535	0.000119924	0.0012514	ENSMUST00000043627	Mrpl12	LastExon
17941	peak_17941	chr18	54895323	54899550	9.64057	-	54895323	54899550	0	2	3142386	0,1841	4123	66573	3998	48170	4.98957	3.95527	-0.954957	0.000120189	0.00125285	ENSMUST00000237844	Zfp608	UTR3
2896	peak_2896	chr3	55116252	55117736	9.64031	+	55116252	55117736	0	2	47753	0,731	516	7865	665	6887	4.7009	3.48976	-1.10427	0.000120283	0.00125307	ENSMUST00000117341	Spg20	UTR5
7829	peak_7829	chr7	127878670	127879845	9.64031	+	127878670	127879845	0	1	1175	0	892	17940	991	16668	5.10925	4.18148	-0.86588	0.000120344	0.00125307	ENSMUST00000131000	Zfp646	LastExon
15666	peak_15666	chr15	76715400	76715500	9.63948	-	76715400	76715500	0	1	100	0	14	294	31	139	4.89604	2.04391	-2.45887	0.000120479	0.00125379	ENSMUST00000127208	Lrrc14	UTR3
3808	peak_3808	chr4	41379117	41379692	9.63757	+	41379117	41379692	0	1	575	0	731	10127	828	7414	4.94904	3.77039	-1.07673	0.000120705	0.00125546	ENSMUST00000154529	Ubap1	UTR5
14878	peak_14878	chr14	20385287	20388203	9.63532	-	20385287	20388203	0	3	191,87,247	0,512,2669	2171	9586	2483	6713	3.37821	2.28919	-0.97059	0.00012096	0.00125741	ENSMUST00000223844	Dnajc9	UTR3
10122	peak_10122	chr9	114405176	114405976	9.63028	+	114405176	114405976	0	1	800	0	44	2977	92	3226	6.55065	4.8991	-1.47338	0.000121518	0.00126181	ENSMUST00000111820	Tmppe	LastExon
10474	peak_10474	chr9	58525699	58526249	9.63028	-	58525699	58526249	0	1	550	0	234	4406	292	3984	4.9241	3.77211	-1.05432	0.000121455	0.00126181	ENSMUST00000039788	Cd276	UTR3
6866	peak_6866	chr6	48437447	48439447	9.6263	-	48437447	48439447	0	1	2000	0	871	10332	1211	11449	3.9329	2.8726	-0.979137	0.000121921	0.00126531	ENSMUST00000114556	Zfp467	UTR3
12454	peak_12454	chr11	4487215	4488040	9.62115	-	4487215	4488040	0	1	825	0	626	10174	715	8275	4.87452	3.73058	-1.0474	0.000122424	0.00126983	ENSMUST00000130716	Mtmr3	UTR3
10029	peak_10029	chr9	106373818	106374418	9.61943	+	106373818	106374418	0	1	600	0	216	8697	382	9503	6.28985	4.95091	-1.21074	0.000122638	0.00127135	ENSMUST00000172306	Dusp7	LastExon
15413	peak_15413	chr15	99427700	99427900	9.61891	+	99427700	99427900	0	1	200	0	62	989	134	1134	3.67585	2.00474	-1.4856	0.000122749	0.0012718	ENSMUST00000159738	Nckap5los	UTR5
12778	peak_12778	chr11	77537711	77538036	9.61247	-	77537711	77538036	0	1	325	0	986	18969	915	10492	5.45731	4.20779	-1.13831	0.000123366	0.00127749	ENSMUST00000058496	Taok1	UTR3
13205	peak_13205	chr12	51372525	51372850	9.61227	+	51372525	51372850	0	1	325	0	263	3683	253	1693	4.92332	3.70758	-1.1077	0.000123451	0.00127767	ENSMUST00000152236	G2e3	UTR5
14006	peak_14006	chr13	65296303	65296678	9.60809	+	65296303	65296678	0	1	375	0	335	3250	366	2047	4.50042	3.21887	-1.16577	0.000123958	0.00128137	ENSMUST00000126879	Zfp369	LastExon
16966	peak_16966	chr17	15375073	15375709	9.60809	-	15375073	15375709	0	2	27523	0,113	478	5113	484	3915	3.42713	2.28204	-1.04912	0.000123972	0.00128137	ENSMUST00000143460	Dll1	Exon
17637	peak_17637	chr18	37816397	37817622	9.60809	+	37816397	37817622	0	1	1225	0	239	4047	361	4101	4.97134	3.747	-1.11458	0.000124013	0.00128137	ENSMUST00000193222	Pcdhgc4	UTR5
5649	peak_5649	chr5	144858768	144859493	9.60579	+	144858768	144859493	0	1	725	0	855	12687	823	9212	4.51645	3.43839	-0.991661	0.000124279	0.00128342	ENSMUST00000138589	Trrap	UTR5
5256	peak_5256	chr5	92941043	92942243	9.60179	+	92941043	92942243	0	1	1200	0	604	4977	773	4999	3.00955	1.9077	-1.01203	0.000124693	0.00128699	ENSMUST00000201800	Shroom3	UTR5
13027	peak_13027	chr11	115490419	115490569	9.60091	-	115490419	115490569	0	1	150	0	249	1678	350	1558	3.85685	2.68718	-1.06895	0.000124837	0.00128777	ENSMUST00000021082	Nt5c	UTR3
8390	peak_8390	chr7	105764146	105765021	9.59994	-	105764146	105765021	0	1	875	0	1100	14548	1140	12165	4.35025	3.35813	-0.921587	0.000125057	0.00128863	ENSMUST00000154659	Dchs1	UTR3
10241	peak_10241	chr9	15996754	15997404	9.59994	-	15996754	15997404	0	1	650	0	758	18142	682	10633	5.7222	4.57411	-1.05266	0.000125017	0.00128863	ENSMUST00000082170	Fat3	Exon
95	peak_95	chr1	43554182	43569347	9.5991	+	43554182	43569347	0	2	400200	0,14965	786	9209	749	5883	3.70438	2.4056	-1.17693	0.000125264	0.00128938	ENSMUST00000086421	Nck2	Exon
8127	peak_8127	chr7	35201888	35202563	9.5991	-	35201888	35202563	0	1	675	0	711	18085	729	13791	4.66398	3.51806	-1.04975	0.000125266	0.00128938	ENSMUST00000118444	Lrp3	UTR3
7386	peak_7386	chr7	27879456	27879556	9.59757	+	27879456	27879556	0	1	100	0	11	222	32	99	5.63731	2.47458	-2.71117	0.000125469	0.00129076	ENSMUST00000053722	Zfp607a	LastExon
11242	peak_11242	chr10	4368273	4368948	9.59671	-	4368273	4368948	0	1	675	0	215	8023	299	6967	6.42474	5.21942	-1.09605	0.000125611	0.00129152	ENSMUST00000215860	Zbtb2	UTR3
8490	peak_8490	chr7	127272710	127273360	9.59615	-	127272710	127273360	0	1	650	0	352	4751	477	3198	4.92437	3.37723	-1.38438	0.000125728	0.00129202	ENSMUST00000082428	Sephs2	LastExon
5897	peak_5897	chr5	74000237	74000612	9.59538	-	74000237	74000612	0	1	375	0	92	3406	142	2232	6.42871	4.93231	-1.3395	0.000125864	0.00129271	ENSMUST00000068058	Usp46	UTR3
4174	peak_4174	chr4	133584636	133584811	9.5907	+	133584636	133584811	0	1	175	0	70	956	118	773	3.50247	1.68426	-1.6058	0.000126362	0.00129691	ENSMUST00000148909	Gpn2	UTR5
12114	peak_12114	chr11	80132760	80134082	9.5907	+	80132760	80134082	0	2	546,54	0,1268	410	5003	432	3002	4.85418	3.65956	-1.09039	0.000126458	0.00129691	ENSMUST00000151815	Atad5	UTR5
12412	peak_12412	chr11	120275025	120279186	9.5907	+	120275025	120279186	0	3	177816132	0,1032,4029	1342	27205	1313	23941	4.41562	3.54017	-0.8185	0.00012648	0.00129691	ENSMUST00000118987	Bahcc1	Exon
15843	peak_15843	chr15	98845429	98845879	9.58674	-	98845429	98845879	0	1	450	0	1428	13005	1443	11084	3.72279	2.74536	-0.906049	0.000126896	0.00130048	ENSMUST00000023741	Kmt2d	Exon
11892	peak_11892	chr11	58346026	58346451	9.58501	+	58346026	58346451	0	1	425	0	245	3317	266	2575	3.68759	2.48239	-1.0969	0.000127117	0.00130204	ENSMUST00000154278	Sh3bp5l	UTR5
13100	peak_13100	chr11	119157751	119209197	9.58268	-	119157751	119209197	0	3	136162427	0,979,51019	1150	8766	1155	7241	2.99021	1.97985	-0.934108	0.000127392	0.00130414	ENSMUST00000207655	Tbc1d16	Exon
12735	peak_12735	chr11	72198384	72202432	9.57709	-	72198384	72202432	0	2	579,21	0,4027	287	4012	353	2777	5.04644	3.75616	-1.16937	0.000127956	0.00130921	ENSMUST00000144553	4933427D14Rik	UTR3
2752	peak_2752	chr2	180685100	180689050	9.57668	-	180685100	180689050	0	3	76322227	0,2375,3723	2287	21966	2347	15609	4.25561	3.1247	-1.03664	0.000128131	0.00130958	ENSMUST00000103054	Dido1	UTR3
10350	peak_10350	chr9	44252712	44253237	9.57668	-	44252712	44253237	0	1	525	0	28	1443	49	1009	6.43446	4.42746	-1.76102	0.000128093	0.00130958	ENSMUST00000168499	Nlrx1	UTR3
1918	peak_1918	chr2	172557218	172557593	9.57277	+	172557218	172557593	0	1	375	0	508	4953	432	1984	4.36159	2.67835	-1.49527	0.000128631	0.00131314	ENSMUST00000122982	Tfap2c	UTR5
2807	peak_2807	chr3	16204018	16214323	9.57277	+	16204018	16214323	0	2	1406369	0,9936	2619	54003	2929	39372	5.61248	4.64535	-0.897238	0.000128789	0.00131314	ENSMUST00000108346	Ythdf3	Exon
2871	peak_2871	chr3	38995989	38996189	9.57277	+	38995989	38996189	0	1	200	0	382	1804	437	1059	3.42908	1.99008	-1.29342	0.000128747	0.00131314	ENSMUST00000061260	Fat4	Exon
5132	peak_5132	chr5	34965442	34966217	9.57277	+	34965442	34966217	0	1	775	0	940	10050	1003	7909	4.22784	3.14657	-0.994815	0.000129095	0.00131314	ENSMUST00000128161	Rgs12	UTR5
9151	peak_9151	chr8	123660978	123661828	9.57277	+	123660978	123661828	0	1	850	0	252	5100	395	4934	5.47883	4.22573	-1.13809	0.000129176	0.00131314	ENSMUST00000045487	Rhou	LastExon
9200	peak_9200	chr8	9972894	9973744	9.57277	-	9972894	9973744	0	1	850	0	187	3305	280	2564	5.39052	3.99446	-1.25806	0.000129062	0.00131314	ENSMUST00000170033	Lig4	LastExon
10245	peak_10245	chr9	16246962	16376750	9.57277	-	16246962	16376750	0	2	731802	0,127986	3592	49321	3178	25978	5.02598	3.8997	-1.03197	0.000128895	0.00131314	ENSMUST00000082170	Fat3	Exon
11624	peak_11624	chr10	116485785	116485885	9.57277	-	116485785	116485885	0	1	100	0	123	833	148	401	3.82703	2.39471	-1.28686	0.000128986	0.00131314	ENSMUST00000169921	Cnot2	UTR3
15870	peak_15870	chr15	100480669	100481294	9.57277	-	100480669	100481294	0	1	625	0	317	4774	374	2871	5.13781	3.73266	-1.26463	0.000129136	0.00131314	ENSMUST00000061457	Csrnp2	UTR3
15950	peak_15950	chr16	13677012	13677437	9.57277	+	13677012	13677437	0	1	425	0	106	1383	143	931	4.91932	3.48914	-1.28538	0.000128983	0.00131314	ENSMUST00000223666	3110001I22Rik	UTR5
3700	peak_3700	chr3	148816460	148817535	9.57248	-	148816460	148817535	0	1	1075	0	1107	40531	1128	25270	6.42701	5.28085	-1.05361	0.000129273	0.00131339	ENSMUST00000199750	Adgrl2	UTR3
3878	peak_3878	chr4	55023488	55050292	9.57248	+	55023488	55050292	0	2	118107	0,26697	1008	3948	876	2725	2.65813	1.6398	-0.940775	0.000129378	0.00131339	ENSMUST00000079605	Zfp462	Exon
16075	peak_16075	chr16	35663251	35664527	9.57248	+	35663251	35664527	0	2	1010,15	0,1261	773	9969	757	6738	4.55659	3.37332	-1.07823	0.00012941	0.00131339	ENSMUST00000050625	Sema5b	LastExon
15871	peak_15871	chr15	100481344	100484468	9.57216	-	100481344	100484468	0	2	1356,19	0,3105	891	25653	883	18199	5.47479	4.32296	-1.05327	0.000129508	0.00131369	ENSMUST00000061457	Csrnp2	UTR3
11776	peak_11776	chr11	29707466	29707641	9.57172	+	29707466	29707641	0	1	175	0	675	2534	772	1848	3.10102	1.9852	-1.02399	0.000129618	0.00131409	ENSMUST00000102841	Rtn4	Exon
17753	peak_17753	chr18	77097408	77097708	9.56997	+	77097408	77097708	0	1	300	0	430	2268	440	1470	3.61983	2.49156	-1.03348	0.000129845	0.00131569	ENSMUST00000168882	Pias2	Exon
9563	peak_9563	chr8	111866147	111866222	9.56645	-	111866147	111866222	0	1	75	0	8	201	29	114	5.84844	2.65071	-2.73871	0.000130233	0.0013189	ENSMUST00000034431	Tmem170	UTR3
3467	peak_3467	chr3	88820060	88820585	9.56236	-	88820060	88820585	0	1	525	0	480	3137	403	1977	3.57584	2.50832	-0.982185	0.000130816	0.00132264	ENSMUST00000183707	1500004A13Rik	UTR3
7136	peak_7136	chr6	124860868	124863766	9.56236	-	124860868	124863766	0	2	1254,96	0,2802	444	7002	603	7710	4.08605	3.03927	-0.963809	0.00013087	0.00132264	ENSMUST00000204161	Gpr162	UTR3
8170	peak_8170	chr7	45005526	45008900	9.56236	-	45005526	45008900	0	3	97,83,2595	0,314,779	5630	77887	5960	74186	3.72142	2.83597	-0.824842	0.000130837	0.00132264	ENSMUST00000085383	Scaf1	Exon
10290	peak_10290	chr9	25130570	25151212	9.56236	-	25130570	25151212	0	3	79,78,393	0,2624,20249	499	16459	488	11159	5.63888	4.41478	-1.11244	0.000130883	0.00132264	ENSMUST00000214190	Herpud2	UTR3
9650	peak_9650	chr8	124910245	124910720	9.5617	-	124910245	124910720	0	1	475	0	527	14382	602	9663	6.00181	4.80146	-1.09369	0.000131012	0.00132325	ENSMUST00000034469	Egln1	UTR3
4002	peak_4002	chr4	108513142	108517433	9.55988	+	108513142	108517433	0	2	424,51	0,4240	546	12953	619	8538	5.77733	4.73799	-0.957402	0.000131389	0.00132492	ENSMUST00000155068	Tut4	Exon
11790	peak_11790	chr11	32622575	32622950	9.55988	+	32622575	32622950	0	1	375	0	17	530	56	592	5.71079	3.49341	-1.9353	0.000131389	0.00132492	ENSMUST00000102821	Stk10	UTR3
17728	peak_17728	chr18	67841172	67843197	9.55988	+	67841172	67843197	0	2	688,62	0,1963	255	5456	285	3387	5.43577	3.95856	-1.32428	0.000131281	0.00132492	ENSMUST00000225303	Cep192	Exon
12233	peak_12233	chr11	98250293	98250493	9.55213	+	98250293	98250493	0	1	200	0	283	1814	294	1073	3.8104	2.4556	-1.22371	0.000132201	0.00133206	ENSMUST00000107538	Cdk12	LastExon
15022	peak_15022	chr14	57733917	57734342	9.55213	-	57733917	57734342	0	1	425	0	85	5402	174	5709	7.21887	5.78273	-1.29265	0.000132309	0.00133206	ENSMUST00000077981	Lats2	Exon
15957	peak_15957	chr16	14473796	14474421	9.55213	+	14473796	14474421	0	1	625	0	98	2006	116	1132	5.48575	3.80167	-1.49411	0.000132295	0.00133206	ENSMUST00000100167	Abcc1	UTR3
3710	peak_3710	chr3	152276308	152276658	9.55132	-	152276308	152276658	0	1	350	0	210	3909	210	1890	5.3649	3.77916	-1.41413	0.000132736	0.0013328	ENSMUST00000068243	Miga1	UTR3
10687	peak_10687	chr9	108111189	108113139	9.55132	-	108111189	108113139	0	1	1950	0	741	15437	791	13514	4.43361	3.41682	-0.939054	0.000132619	0.0013328	ENSMUST00000035208	Bsn	Exon
11935	peak_11935	chr11	60778149	60780274	9.55132	+	60778149	60780274	0	1	2125	0	829	11510	1003	10471	4.88299	3.88566	-0.922452	0.000132545	0.0013328	ENSMUST00000102667	Smcr8	LastExon
14829	peak_14829	chr14	103688319	103688369	9.55132	+	103688319	103688369	0	1	50	0	374	1228	461	1064	2.58391	1.43084	-1.0542	0.000132624	0.0013328	ENSMUST00000162818	Slain1	LastExon
18418	peak_18418	chr19	59459246	59461708	9.55132	+	59459246	59461708	0	2	378,47	0,2415	644	8523	723	6939	3.43751	2.26757	-1.06493	0.000132708	0.0013328	ENSMUST00000062216	Emx2	Exon
8820	peak_8820	chr8	70913722	70914947	9.54966	+	70913722	70914947	0	1	1225	0	828	15778	923	15366	4.04964	3.13277	-0.857726	0.000133101	0.00133433	ENSMUST00000212143	Map1s	UTR5
10582	peak_10582	chr9	85735086	85743564	9.54966	-	85735086	85743564	0	3	13,97,190	0,2381,8288	296	4409	272	2248	5.07552	3.68394	-1.25273	0.000133051	0.00133433	ENSMUST00000185353	Ibtk	UTR3
11575	peak_11575	chr10	91149020	91149470	9.54966	-	91149020	91149470	0	1	450	0	1004	11511	1051	6433	4.64807	3.57773	-0.987096	0.000133048	0.00133433	ENSMUST00000215801	Tmpo	UTR3
1619	peak_1619	chr2	119816931	119817131	9.54453	+	119816931	119817131	0	1	200	0	116	858	160	686	2.95627	1.45556	-1.34412	0.00013386	0.00133909	ENSMUST00000147761	Tyro3	UTR5
5864	peak_5864	chr5	53200058	53200183	9.54453	-	53200058	53200183	0	1	125	0	130	880	158	515	3.50324	1.78326	-1.52338	0.000133836	0.00133909	ENSMUST00000199919	Sel1l3	UTR3
16121	peak_16121	chr16	43640847	43641522	9.54453	+	43640847	43641522	0	1	675	0	456	3371	531	2173	4.11291	2.93886	-1.07199	0.000133773	0.00133909	ENSMUST00000114694	Zbtb20	UTR3
17623	peak_17623	chr18	37743626	37743751	9.54453	+	37743626	37743751	0	1	125	0	53	443	86	320	3.65753	1.79067	-1.6439	0.000133728	0.00133909	ENSMUST00000003599	Pcdhgb6	Exon
7684	peak_7684	chr7	100454826	100455176	9.54277	+	100454826	100455176	0	1	350	0	592	4130	617	3173	3.45939	2.33987	-1.02643	0.000134165	0.00134073	ENSMUST00000120196	C2cd3	Exon
8670	peak_8670	chr8	14896664	14897439	9.54277	+	14896664	14897439	0	1	775	0	283	11394	385	9515	6.36525	5.05029	-1.1891	0.000134137	0.00134073	ENSMUST00000027554	Cln8	LastExon
16742	peak_16742	chr17	35847475	35848175	9.54152	+	35847475	35848175	0	1	700	0	1307	17671	1405	13883	4.63221	3.50305	-1.03049	0.000134353	0.00134189	ENSMUST00000082337	Mdc1	Exon
16590	peak_16590	chr17	23558062	23558312	9.53597	+	23558062	23558312	0	1	250	0	50	2016	92	1909	5.27924	3.5678	-1.51537	0.000134941	0.00134706	ENSMUST00000180920	Gm26695	UTR5
8082	peak_8082	chr7	29371204	29378035	9.53202	-	29371204	29378035	0	2	35540	0,6291	192	3160	271	2890	4.7644	3.46096	-1.18499	0.000135384	0.00135076	ENSMUST00000085809	Sipa1l3	Exon
11768	peak_11768	chr11	29188276	29194649	9.53191	+	29188276	29194649	0	2	298,77	0,6296	459	5654	485	3348	4.70547	3.75662	-0.881482	0.000135465	0.00135085	ENSMUST00000020755	Ppp4r3b	Exon
4890	peak_4890	chr4	147874198	147874448	9.52691	-	147874198	147874448	0	1	250	0	213	1670	268	1196	3.7966	2.31789	-1.3245	0.00013609	0.00135555	ENSMUST00000105715	Mfn2	UTR3
5440	peak_5440	chr5	122240229	122241809	9.52691	+	122240229	122241809	0	2	971203	0,377	387	3790	437	3320	4.00773	2.95608	-0.972927	0.000136152	0.00135555	ENSMUST00000111738	Tctn1	UTR3
16405	peak_16405	chr16	56033883	56034183	9.52691	-	56033883	56034183	0	1	300	0	181	2183	236	1289	4.7822	3.40541	-1.24314	0.0001361	0.00135555	ENSMUST00000059052	Trmt10c	UTR3
16638	peak_16638	chr17	26961724	26962449	9.52358	+	26961724	26962449	0	1	725	0	826	14434	933	14164	4.01389	3.08202	-0.866774	0.000136538	0.00135867	ENSMUST00000231853	Syngap1	Exon
7758	peak_7758	chr7	120940502	120944595	9.52184	+	120940502	120944595	0	3	323,78,49	0,1987,4044	249	2688	311	1996	4.04383	2.61169	-1.28649	0.000136788	0.00136032	ENSMUST00000033173	Polr3e	Exon
13041	peak_13041	chr11	115925501	115927361	9.52184	-	115925501	115927361	0	2	17,33	0,1827	80	506	122	317	3.62952	1.7029	-1.69185	0.000136847	0.00136032	ENSMUST00000156776	Recql5	UTR3
4792	peak_4792	chr4	134526099	134526474	9.5215	-	134526099	134526474	0	1	375	0	347	3630	392	2317	4.5956	3.30587	-1.17318	0.000136951	0.00136064	ENSMUST00000131613	Mtfr1l	UTR3
14299	peak_14299	chr13	60175254	60177354	9.51857	-	60175254	60177354	0	1	2100	0	3762	138211	3056	70405	4.92026	3.5271	-1.23257	0.000137302	0.00136341	ENSMUST00000065086	Gas1	UTR3
4900	peak_4900	chr4	148435019	148435294	9.51697	-	148435019	148435294	0	1	275	0	74	824	101	581	4.45939	2.84736	-1.4323	0.000137527	0.00136492	ENSMUST00000051633	Ubiad1	UTR3
2050	peak_2050	chr2	25939341	25940066	9.5165	-	25939341	25940066	0	1	725	0	2008	19313	1848	13893	4.24539	3.27236	-0.901521	0.000137644	0.00136537	ENSMUST00000143977	Camsap1	UTR3
12628	peak_12628	chr11	59792157	59792557	9.51521	-	59792157	59792557	0	1	400	0	83	2549	127	1749	6.06768	4.34038	-1.5277	0.00013784	0.00136658	ENSMUST00000091246	Flcn	UTR3
18222	peak_18222	chr19	18717251	18717651	9.51389	+	18717251	18717651	0	1	400	0	951	7261	902	3935	4.18177	2.93137	-1.13468	0.000138038	0.00136783	ENSMUST00000055792	D030056L22Rik	LastExon
13541	peak_13541	chr12	41452447	41452697	9.50824	-	41452447	41452697	0	1	250	0	91	937	129	524	4.56671	2.96113	-1.43025	0.000138653	0.0013732	ENSMUST00000043884	Lrrn3	LastExon
9387	peak_9387	chr8	71479283	71480626	9.50678	-	71479283	71480626	0	2	59191	0,1152	593	2949	566	2262	2.6643	1.59949	-0.979854	0.000138867	0.0013746	ENSMUST00000213016	Ano8	UTR3
8660	peak_8660	chr8	13878399	13878824	9.50543	+	13878399	13878824	0	1	425	0	460	4294	506	3605	3.72267	2.61274	-1.01745	0.000139215	0.00137588	ENSMUST00000128557	Champ1	LastExon
11420	peak_11420	chr10	75551824	75552149	9.50543	-	75551824	75552149	0	1	325	0	103	936	144	571	4.14036	2.32871	-1.59846	0.000139175	0.00137588	ENSMUST00000051129	Lrrc75b	UTR3
17077	peak_17077	chr17	28599627	28599877	9.50543	-	28599627	28599877	0	1	250	0	956	4024	900	2627	3.28146	2.2535	-0.948102	0.000139112	0.00137588	ENSMUST00000126683	Srpk1	UTR3
12514	peak_12514	chr11	22006427	22006777	9.5042	-	22006427	22006777	0	1	350	0	403	3644	404	1833	4.41905	3.01432	-1.26245	0.000139406	0.00137705	ENSMUST00000109563	Ehbp1	UTR3
3722	peak_3722	chr4	3615030	3615080	9.50349	+	3615030	3615080	0	1	50	0	270	1061	270	544	3.22741	1.84303	-1.24648	0.000139549	0.00137773	ENSMUST00000052712	Tgs1	UTR3
181	peak_181	chr1	74352182	74352232	9.49858	+	74352182	74352232	0	1	50	0	63	455	83	288	3.41803	1.66182	-1.55219	0.000140098	0.00138243	ENSMUST00000087225	Pnkd	UTR3
13389	peak_13389	chr12	102472095	102472470	9.49738	+	102472095	102472470	0	1	375	0	284	4983	331	3624	5.32947	4.13037	-1.09184	0.000140356	0.00138357	ENSMUST00000021609	Golga5	Exon
17075	peak_17075	chr17	28589547	28589822	9.49738	-	28589547	28589822	0	1	275	0	235	2142	245	1141	4.44017	2.96457	-1.32137	0.000140361	0.00138357	ENSMUST00000004987	Srpk1	UTR3
1836	peak_1836	chr2	156567132	156567707	9.49662	+	156567132	156567707	0	1	575	0	372	5160	419	3586	4.92398	3.68665	-1.12177	0.000140512	0.00138431	ENSMUST00000029158	Aar2	UTR3
4933	peak_4933	chr4	151062262	151062762	9.49662	-	151062262	151062762	0	1	500	0	562	9455	570	5458	5.31963	4.06564	-1.13812	0.000140633	0.00138431	ENSMUST00000105668	Camta1	UTR3
19171	peak_19171	chrX	150654658	150655158	9.49662	-	150654658	150655158	0	1	500	0	1146	4317	1370	3620	3.14684	2.12707	-0.935793	0.000140655	0.00138431	ENSMUST00000148604	Tro	Exon
15859	peak_15859	chr15	99427760	99427910	9.49329	-	99427760	99427910	0	1	150	0	28	411	77	387	3.52287	1.23216	-1.9893	0.000141053	0.0013875	ENSMUST00000159738	Nckap5los	UTR5
4109	peak_4109	chr4	126566084	126572356	9.49005	+	126566084	126572356	0	2	497,78	0,6194	707	7101	686	4054	4.20063	2.78177	-1.27738	0.000141666	0.00139063	ENSMUST00000048391	Clspn	Exon
5464	peak_5464	chr5	123371052	123371727	9.49005	+	123371052	123371727	0	1	675	0	2109	29502	1542	12522	4.62068	3.22396	-1.25618	0.00014152	0.00139063	ENSMUST00000120593	Bcl7a	UTR5
6827	peak_6827	chr6	38127084	38127209	9.49005	-	38127084	38127209	0	1	125	0	79	431	102	226	3.67141	1.88776	-1.5734	0.000141638	0.00139063	ENSMUST00000144973	D630045J12Rik	UTR3
17445	peak_17445	chr18	31771812	31774308	9.49005	+	31771812	31774308	0	2	302,73	0,2423	353	3949	405	2540	4.4597	3.01491	-1.29566	0.000141637	0.00139063	ENSMUST00000234441	Ammecr1l	UTR5
9898	peak_9898	chr9	64133295	64138064	9.487	+	64133295	64138064	0	3	2,64,259	0,1556,4510	204	2874	254	1644	5.05421	3.44813	-1.4285	0.00014218	0.00139357	ENSMUST00000176848	Zwilch	UTR3
12795	peak_12795	chr11	80137077	80137152	9.487	-	80137077	80137152	0	1	75	0	25	268	45	150	4.56543	2.32113	-1.95026	0.000142188	0.00139357	ENSMUST00000136996	Tefm	UTR3
13329	peak_13329	chr12	85014707	85028783	9.487	+	85014707	85028783	0	2	886,14	0,14062	2033	28759	1984	21519	4.64891	3.61369	-0.955402	0.000142145	0.00139357	ENSMUST00000164558	Ylpm1	Exon
3638	peak_3638	chr3	121156274	121156597	9.48141	-	121156274	121156597	0	2	28197	0,126	87	862	117	392	4.5754	2.56509	-1.75863	0.000142813	0.00139898	ENSMUST00000170781	Rwdd3	UTR3
2820	peak_2820	chr3	27241724	27242299	9.4803	+	27241724	27242299	0	1	575	0	8	827	36	852	7.92307	5.36744	-2.21284	0.000143082	0.00140005	ENSMUST00000046515	Nceh1	LastExon
9233	peak_9233	chr8	22175805	22176919	9.4803	-	22175805	22176919	0	2	154146	0,968	426	3272	513	2207	4.19997	2.89147	-1.1827	0.000143146	0.00140005	ENSMUST00000046916	Ckap2	Exon
9651	peak_9651	chr8	124914130	124948489	9.4803	-	124914130	124948489	0	3	23120257	0,1530,34102	1318	7185	1371	5344	3.16237	2.01948	-1.04553	0.00014306	0.00140005	ENSMUST00000034469	Egln1	Exon
13755	peak_13755	chr12	102812832	102838056	9.47953	-	102812832	102838056	0	2	11439	0,24785	446	3346	558	2410	4.14777	3.02807	-1.03356	0.000143297	0.0014008	ENSMUST00000221376	Btbd7	UTR3
12350	peak_12350	chr11	115393407	115393557	9.47733	+	115393407	115393557	0	1	150	0	114	639	202	738	2.51421	1.14667	-1.23176	0.00014359	0.00140294	ENSMUST00000053288	Cdr2l	LastExon
11847	peak_11847	chr11	53399728	53400378	9.47689	+	53399728	53400378	0	1	650	0	1792	13239	1586	8322	3.91471	2.82187	-1.00256	0.000143708	0.00140337	ENSMUST00000060945	Aff4	Exon
6398	peak_6398	chr6	40254821	40255046	9.47645	+	40254821	40255046	0	1	225	0	91	1233	120	614	4.81219	3.32693	-1.32795	0.000143854	0.0014038	ENSMUST00000180588	Tmem178b	UTR5
9941	peak_9941	chr9	72951090	72951365	9.47645	+	72951090	72951365	0	1	275	0	241	4022	277	2450	5.26501	3.8712	-1.25414	0.000143901	0.0014038	ENSMUST00000038489	Pygo1	UTR3
13117	peak_13117	chr11	120488088	120488574	9.47594	-	120488088	120488574	0	2	81119	0,367	293	2880	327	1771	3.76643	2.23457	-1.36769	0.000144027	0.0014043	ENSMUST00000180595	Gm16755	UTR3
15678	peak_15678	chr15	76910850	76911075	9.47121	-	76910850	76911075	0	1	225	0	121	2207	135	1405	4.75536	3.26313	-1.33438	0.000144574	0.00140891	ENSMUST00000229055	Zfp647	UTR3
5073	peak_5073	chr5	30266957	30267307	9.46897	+	30266957	30267307	0	1	350	0	225	2649	226	1418	4.7624	3.59404	-1.06564	0.000145019	0.00141109	ENSMUST00000132404	Selenoi	UTR3
5865	peak_5865	chr5	53200283	53200383	9.46897	-	53200283	53200383	0	1	100	0	101	533	131	345	3.49464	1.86032	-1.45087	0.000145239	0.00141109	ENSMUST00000199919	Sel1l3	UTR3
8491	peak_8491	chr7	127343071	127343871	9.46897	-	127343071	127343871	0	1	800	0	556	4103	819	5284	3.14033	2.21592	-0.861286	0.000145159	0.00141109	ENSMUST00000205266	Zfp768	UTR3
9042	peak_9042	chr8	110223062	110223637	9.46897	+	110223062	110223637	0	1	575	0	44	2330	84	1723	6.9605	5.15822	-1.58773	0.000145157	0.00141109	ENSMUST00000056972	Cmtr2	LastExon
11451	peak_11451	chr10	78273377	78273702	9.46897	-	78273377	78273702	0	1	325	0	321	4857	363	3288	5.03834	3.74486	-1.17052	0.000145247	0.00141109	ENSMUST00000166360	Agpat3	UTR3
17428	peak_17428	chr18	22524144	22525719	9.46897	+	22524144	22525719	0	1	1575	0	462	10350	549	7488	5.61688	4.366	-1.1329	0.000145043	0.00141109	ENSMUST00000097655	Asxl3	LastExon
6097	peak_6097	chr5	123623223	123630835	9.46772	-	123623223	123630835	0	3	47117611	0,4070,7001	1365	42766	1557	32768	6.18546	5.12545	-0.980381	0.000145673	0.00141231	ENSMUST00000144121	Clip1	UTR3
11251	peak_11251	chr10	7160651	7211725	9.46772	-	7160651	7211725	0	2	156,94	0,50980	106	2212	148	1747	4.94467	3.40604	-1.37397	0.00014552	0.00141231	ENSMUST00000015346	Cnksr3	Exon
11257	peak_11257	chr10	7907252	7907377	9.46772	-	7907252	7907377	0	1	125	0	155	668	210	568	3.00548	1.68467	-1.19273	0.000145659	0.00141231	ENSMUST00000146444	Tab2	UTR3
12187	peak_12187	chr11	88981588	88985052	9.46772	+	88981588	88985052	0	4	579,87,48,36	0,700,1014,3428	203	3349	273	2867	4.9255	3.63828	-1.16571	0.000145545	0.00141231	ENSMUST00000036649	Coil	Exon
14483	peak_14483	chr13	103820261	103820736	9.46316	-	103820261	103820736	0	1	475	0	770	11482	869	7281	5.00879	4.02919	-0.90889	0.00014621	0.00141679	ENSMUST00000191275	Erbin	UTR3
8238	peak_8238	chr7	66647539	66660113	9.46086	-	66647539	66660113	0	2	386464	0,12110	304	11217	386	7922	6.42227	5.12975	-1.16868	0.000146518	0.00141905	ENSMUST00000131320	Asb7	UTR3
1665	peak_1665	chr2	121302428	121305328	9.45945	+	121302428	121305328	0	1	2900	0	2044	28863	2836	33653	4.51448	3.58876	-0.858726	0.000146736	0.00142043	ENSMUST00000110639	Map1a	Exon
2559	peak_2559	chr2	154560506	154560931	9.45901	-	154560506	154560931	0	1	425	0	290	3506	299	2332	4.21839	2.8696	-1.21613	0.000147234	0.00142087	ENSMUST00000000894	E2f1	UTR3
2645	peak_2645	chr2	165010483	165022690	9.45901	-	165010483	165022690	0	3	104,327,19	0,2352,12188	1850	15408	1722	9268	3.99436	2.74113	-1.13732	0.000146984	0.00142087	ENSMUST00000127545	Ncoa5	UTR3
9603	peak_9603	chr8	121600227	121605103	9.45901	-	121600227	121605103	0	2	21041296	0,3580	3978	101896	3691	72405	5.57815	4.56557	-0.934419	0.000147128	0.00142087	ENSMUST00000154725	Zcchc14	UTR3
10646	peak_10646	chr9	105130112	105130387	9.45901	-	105130112	105130387	0	1	275	0	38	1068	60	662	5.97764	4.10116	-1.64888	0.000147157	0.00142087	ENSMUST00000186925	Nudt16	UTR3
12843	peak_12843	chr11	87981149	87981399	9.45901	-	87981149	87981399	0	1	250	0	770	3383	809	2636	3.25544	2.24904	-0.930205	0.000147188	0.00142087	ENSMUST00000178105	Dynll2	UTR3
16852	peak_16852	chr17	56598326	56598426	9.45901	+	56598326	56598426	0	1	100	0	207	677	208	460	2.54107	1.29415	-1.13161	0.000147218	0.00142087	ENSMUST00000182378	Safb	UTR5
4565	peak_4565	chr4	95049708	95051608	9.45468	-	95049708	95051608	0	1	1900	0	4458	181005	4237	136440	5.65354	4.60936	-0.961132	0.000147752	0.00142515	ENSMUST00000107094	Jun	UTR3
3623	peak_3623	chr3	115711357	115712107	9.45414	-	115711357	115712107	0	1	750	0	414	6805	594	6637	5.08141	3.90358	-1.07302	0.000147958	0.00142567	ENSMUST00000055676	S1pr1	UTR3
10661	peak_10661	chr9	106838311	106869226	9.45414	-	106838311	106869226	0	2	146,29	0,30886	196	1730	241	1018	4.2771	3.05779	-1.10769	0.000147908	0.00142567	ENSMUST00000159620	Manf	UTR3
12110	peak_12110	chr11	79692797	79693097	9.45176	+	79692797	79693097	0	1	300	0	311	4158	268	1829	4.51103	2.92854	-1.40804	0.000148354	0.00142803	ENSMUST00000017783	Rab11fip4	LastExon
13459	peak_13459	chr12	112977617	112978117	9.45176	+	112977617	112978117	0	1	500	0	243	4302	301	3574	5.02323	3.77238	-1.13351	0.000148335	0.00142803	ENSMUST00000223508	Btbd6	LastExon
6258	peak_6258	chr5	143174360	143174760	9.44895	-	143174360	143174760	0	1	400	0	131	1371	154	722	4.61815	2.97919	-1.45375	0.000148718	0.00143081	ENSMUST00000166382	Rbak	UTR3
12151	peak_12151	chr11	85345643	85346318	9.44853	+	85345643	85346318	0	1	675	0	383	10507	425	6804	6.0276	4.82418	-1.10092	0.000148838	0.00143123	ENSMUST00000020835	Ppm1d	LastExon
2633	peak_2633	chr2	160961980	160965520	9.44467	-	160961980	160965520	0	3	34,39,352	0,2777,3188	855	11672	824	7067	4.94031	3.73799	-1.09485	0.000149312	0.00143506	ENSMUST00000039782	Chd6	Exon
5683	peak_5683	chr5	150539323	150539698	9.44233	+	150539323	150539698	0	1	375	0	295	4144	375	2629	5.01967	3.75682	-1.14378	0.000149632	0.00143739	ENSMUST00000202003	Brca2	LastExon
3346	peak_3346	chr3	52104455	52104880	9.43957	-	52104455	52104880	0	1	425	0	228	2739	332	2557	4.52278	3.21922	-1.17772	0.000149995	0.00144015	ENSMUST00000121440	Maml3	UTR5
12019	peak_12019	chr11	70940462	70940912	9.43594	+	70940462	70940912	0	1	450	0	514	14201	635	9221	6.03126	4.76027	-1.15261	0.000150449	0.00144378	ENSMUST00000100928	Rabep1	UTR3
2554	peak_2554	chr2	153230158	153232383	9.43509	-	153230158	153232383	0	1	2225	0	1232	22509	1454	17754	5.14696	3.93209	-1.10278	0.000150944	0.00144462	ENSMUST00000109795	Plagl2	UTR3
6384	peak_6384	chr6	38463732	38464032	9.43509	+	38463732	38464032	0	1	300	0	579	6504	577	4148	4.70596	3.58977	-1.02124	0.000151045	0.00144462	ENSMUST00000161280	Ubn2	UTR5
8439	peak_8439	chr7	119716620	119716945	9.43509	-	119716620	119716945	0	1	325	0	468	4748	557	2981	4.56621	3.16085	-1.26329	0.000150859	0.00144462	ENSMUST00000033236	Thumpd1	UTR3
8559	peak_8559	chr7	133749022	133760117	9.43509	-	133749022	133760117	0	3	14,514,97	0,10377,10998	906	23684	962	15340	5.46341	4.10777	-1.2207	0.00015095	0.00144462	ENSMUST00000211450	Dhx32	UTR3
11413	peak_11413	chr10	70559356	70559681	9.43509	-	70559356	70559681	0	1	325	0	179	3011	231	2036	5.30313	3.92583	-1.23837	0.000150851	0.00144462	ENSMUST00000162251	Phyhipl	LastExon
12006	peak_12006	chr11	70453181	70453606	9.43509	+	70453181	70453606	0	1	425	0	231	2999	302	2045	4.76067	3.25621	-1.34608	0.000151074	0.00144462	ENSMUST00000152348	Med11	UTR5
14125	peak_14125	chr13	119610253	119610428	9.43509	+	119610253	119610428	0	1	175	0	47	698	75	310	5.00206	3.01204	-1.7414	0.000150976	0.00144462	ENSMUST00000178948	Tmem267	UTR3
6047	peak_6047	chr5	116443996	116444571	9.43204	-	116443996	116444571	0	1	575	0	1028	14375	790	6402	4.58769	3.1783	-1.2661	0.00015147	0.00144768	ENSMUST00000139425	Srrm4	UTR3
5978	peak_5978	chr5	108582780	108583055	9.4316	-	108582780	108583055	0	1	275	0	206	1598	228	1025	3.75546	2.34722	-1.26426	0.000151593	0.00144812	ENSMUST00000137872	Gak	UTR3
10421	peak_10421	chr9	54446435	54446710	9.42689	-	54446435	54446710	0	1	275	0	120	1740	139	761	5.0773	3.32839	-1.54921	0.000152243	0.00145286	ENSMUST00000144736	Dmxl2	UTR3
14800	peak_14800	chr14	76415585	76417660	9.42689	+	76415585	76417660	0	1	2075	0	4770	54715	4680	47750	3.89795	3.00298	-0.833973	0.000152215	0.00145286	ENSMUST00000177333	Tsc22d1	UTR5
4871	peak_4871	chr4	143111638	143131920	9.42652	-	143111638	143131920	0	2	139211	0,20071	454	2587	486	1827	3.40903	2.17635	-1.11987	0.000152359	0.00145323	ENSMUST00000105778	Prdm2	Exon
2982	peak_2982	chr3	88712534	88712859	9.42165	+	88712534	88712859	0	1	325	0	606	15882	669	9138	5.90426	4.74321	-1.06005	0.000152952	0.00145815	ENSMUST00000199684	Khdc4	UTR3
15232	peak_15232	chr15	57821234	57821584	9.41608	+	57821234	57821584	0	1	350	0	247	1868	363	1767	4.0213	2.796	-1.1113	0.000153699	0.00146379	ENSMUST00000096430	Zhx2	UTR5
17147	peak_17147	chr17	34893655	34898181	9.41608	-	34893655	34898181	0	4	45,41,161,78	0,1239,1751,4448	302	5121	357	3564	4.83382	3.42232	-1.26759	0.000153628	0.00146379	ENSMUST00000174279	C2	UTR3
9186	peak_9186	chr8	3211683	3258690	9.41172	-	3211683	3258690	0	2	17308	0,46699	240	2652	247	1857	4.48134	3.3099	-1.06711	0.000154242	0.00146822	ENSMUST00000139504	Insr	UTR3
5168	peak_5168	chr5	47984079	47989183	9.4108	+	47984079	47989183	0	3	1139,72,64	0,3759,5040	1492	15662	1761	14800	4.03706	3.01689	-0.942205	0.000154418	0.00146915	ENSMUST00000196024	Slit2	UTR5
15280	peak_15280	chr15	76694500	76694919	9.40959	+	76694500	76694919	0	1	419	0	145	3610	181	3068	4.8987	3.58001	-1.18962	0.000154625	0.00147038	ENSMUST00000150399	Ppp1r16a	UTR3
137	peak_137	chr1	59867575	59868450	9.40832	+	59867575	59868450	0	1	875	0	1491	16584	1595	11645	4.71083	3.65643	-0.970455	0.000155142	0.00147168	ENSMUST00000087435	Bmpr2	Exon
1328	peak_1328	chr2	30953808	30954083	9.40832	+	30953808	30954083	0	1	275	0	93	1013	118	632	4.65348	3.13051	-1.35748	0.000154954	0.00147168	ENSMUST00000155213	Tor1b	UTR5
5395	peak_5395	chr5	115645687	115646212	9.40832	+	115645687	115646212	0	1	525	0	541	5507	570	4448	3.89593	2.81538	-0.992254	0.000155028	0.00147168	ENSMUST00000138885	Rab35	UTR3
9301	peak_9301	chr8	47288181	47289331	9.40832	-	47288181	47289331	0	1	1150	0	1264	11914	1310	10716	2.73236	1.83403	-0.821429	0.000155152	0.00147168	ENSMUST00000211737	Stox2	UTR5
13335	peak_13335	chr12	85226343	85226493	9.40832	+	85226343	85226493	0	1	150	0	31	303	47	136	4.38661	2.03527	-2.03399	0.000155043	0.00147168	ENSMUST00000004910	Eif2b2	UTR3
4391	peak_4391	chr4	34809187	34809387	9.40796	-	34809187	34809387	0	1	200	0	402	2356	457	1489	3.73919	2.66237	-0.991029	0.000155269	0.00147205	ENSMUST00000047950	Zfp292	LastExon
3738	peak_3738	chr4	10898109	10898484	9.40749	+	10898109	10898484	0	1	375	0	107	1485	168	1035	5.06809	3.47414	-1.41319	0.000155553	0.00147252	ENSMUST00000101504	2610301B20Rik	UTR3
5646	peak_5646	chr5	144277060	144279098	9.40749	+	144277060	144279098	0	3	268,40,42	0,622,1996	45	2136	50	1032	6.57866	4.78179	-1.58181	0.000155519	0.00147252	ENSMUST00000156467	Gm15708	UTR5
18754	peak_18754	chrX	66655388	66655813	9.40749	+	66655388	66655813	0	1	425	0	157	3458	167	1695	5.66678	4.10459	-1.39079	0.000155516	0.00147252	ENSMUST00000036043	Slitrk2	LastExon
8985	peak_8985	chr8	105856277	105856902	9.40711	+	105856277	105856902	0	1	625	0	352	11656	428	8874	6.26364	5.10538	-1.05671	0.0001557	0.00147291	ENSMUST00000040445	Thap11	LastExon
12910	peak_12910	chr11	98327164	98329606	9.40711	-	98327164	98329606	0	2	1177173	0,2269	5313	96219	4633	51806	3.92642	2.53356	-1.25136	0.000155751	0.00147291	ENSMUST00000041685	Neurod2	UTR3
6746	peak_6746	chr6	149329035	149329760	9.4065	+	149329035	149329760	0	1	725	0	565	7647	642	5010	4.96882	3.90532	-0.97673	0.000155895	0.00147354	ENSMUST00000189837	Resf1	Exon
12455	peak_12455	chr11	4488115	4488465	9.40645	-	4488115	4488465	0	1	350	0	550	5570	585	4103	3.84543	2.61414	-1.12801	0.000155978	0.00147359	ENSMUST00000155566	Mtmr3	UTR3
13038	peak_13038	chr11	115800739	115801364	9.40131	-	115800739	115801364	0	1	625	0	343	8018	419	7241	4.45677	3.27769	-1.07356	0.000156613	0.00147884	ENSMUST00000041684	Caskin2	Exon
1114	peak_1114	chr1	181905519	181905869	9.40085	-	181905519	181905869	0	1	350	0	2022	15184	1935	9167	4.15619	3.11103	-0.961356	0.000156741	0.00147932	ENSMUST00000111030	Enah	UTR3
6246	peak_6246	chr5	142771328	142773818	9.39996	-	142771328	142773818	0	2	975200	0,2290	4103	51333	4052	46087	3.61346	2.72883	-0.832203	0.000156917	0.00148023	ENSMUST00000151477	Tnrc18	Exon
[truncated: 17,231 more rows]

## Sheet: 8150 differential m6A peaks
Peak_ID	name	chr	chromStart	chromEnd	score	strand	thickStart	thickEnd	itemRgb	blockCount	blockSizes	blockStarts	ReadsCount.input.Control	ReadsCount.IP.Control	ReadsCount.input.Treated	ReadsCount.IP.Treated	ModLog2FC_control	ModLog2FC_treated	DiffModLog2FC	pvalue	padj	OverlapGene	Symbol	Priority
1184	peak_1184	chr1	191895061	191895186	6.61487	-	191895061	191895186	0	1	125	0	0	139	3	25	8.76606	3.78044	-4.2826	0.00258491	0.010203	ENSMUST00000139827	1700034H15Rik	UTR3
3047	peak_3047	chr3	94402856	94403081	7.83169	+	94402856	94403081	0	1	225	0	0	242	9	225	8.76983	4.28145	-4.21041	0.000776801	0.00438961	ENSMUST00000050975	Lingo4	LastExon
11505	peak_11505	chr10	80834531	80834656	9.7658	-	80834531	80834656	0	1	125	0	2	234	26	194	6.67957	1.94767	-4.07609	0.000103617	0.00114869	ENSMUST00000053986	Lingo3	LastExon
16992	peak_16992	chr17	23682583	23682708	6.8288	-	23682583	23682708	0	1	125	0	0	86	7	56	8.02705	3.61655	-3.86787	0.00209725	0.00879681	ENSMUST00000085989	Cldn9	UTR3
4130	peak_4130	chr4	128846521	128846621	7.37738	+	128846521	128846621	0	1	100	0	1	97	8	27	7.49106	2.36526	-3.84661	0.00121996	0.00601431	ENSMUST00000138291	Gm12968	UTR5
7746	peak_7746	chr7	112954061	112954186	7.09176	+	112954061	112954186	0	1	125	0	0	123	12	168	7.40303	3.12901	-3.83633	0.0016274	0.00733106	ENSMUST00000182858	Rassf10	UTR5
13399	peak_13399	chr12	105381634	105381809	7.0077	+	105381634	105381809	0	1	175	0	0	162	9	190	8.23205	4.07339	-3.69243	0.00175924	0.0077709	ENSMUST00000180503	Tunar	UTR3
9316	peak_9316	chr8	57777074	57777199	6.13921	-	57777074	57777199	0	1	125	0	0	105	7	55	8.40594	3.90136	-3.65856	0.00409523	0.0141877	ENSMUST00000098757	Galntl6	UTR3
10734	peak_10734	chr9	119972515	119972690	6.35672	-	119972515	119972690	0	1	175	0	0	148	7	124	7.97275	3.85966	-3.42505	0.00332733	0.0122021	ENSMUST00000214058	Csrnp1	LastExon
17601	peak_17601	chr18	37518352	37518577	11.7586	+	37518352	37518577	0	1	225	0	5	515	47	519	7.62754	3.80197	-3.42091	9.9638e-06	0.000288614	ENSMUST00000097609	Pcdhb22	UTR5
6449	peak_6449	chr6	54330119	54330194	7.18647	+	54330119	54330194	0	1	75	0	3	230	6	27	7.54161	3.0397	-3.40908	0.00148103	0.00686524	ENSMUST00000059138	Prr15	UTR3
9564	peak_9564	chr8	111889659	111889884	6.01655	-	111889659	111889884	0	1	225	0	0	239	4	97	9.45719	5.19822	-3.32214	0.00462329	0.0154467	ENSMUST00000034430	Chst5	UTR3
10060	peak_10060	chr9	108055458	108055558	5.88844	+	108055458	108055558	0	1	100	0	0	94	9	101	7.62072	3.36017	-3.3147	0.00521199	0.0168812	ENSMUST00000085060	Amigo3	UTR3
18437	peak_18437	chr19	4165073	4165173	5.76051	-	4165073	4165173	0	1	100	0	0	138	4	59	8.64114	4.34157	-3.18615	0.00585568	0.0184465	ENSMUST00000236513	Carns1	UTR3
7290	peak_7290	chr7	18988548	18988723	6.03704	+	18988548	18988723	0	1	175	0	0	138	7	116	8.63813	4.63643	-3.17159	0.0045274	0.0152289	ENSMUST00000063563	Nanos2	UTR3
1817	peak_1817	chr2	155630570	155630832	7.34785	+	155630570	155630832	0	2	23152	0,110	2	211	16	178	6.67046	2.67211	-3.17131	0.00125996	0.0061387	ENSMUST00000092995	Myh7b	Exon
8191	peak_8191	chr7	45817035	45817385	7.52996	-	45817035	45817385	0	1	350	0	2	292	23	308	8.42299	4.47432	-3.16239	0.00105019	0.00541075	ENSMUST00000071937	Kcnj14	UTR3
17552	peak_17552	chr18	37344151	37344326	9.95381	+	37344151	37344326	0	1	175	0	5	272	18	110	6.95673	3.30822	-3.1502	8.41123e-05	0.00100833	ENSMUST00000053037	Pcdhb7	LastExon
5734	peak_5734	chr5	21951857	21951982	7.79105	-	21951857	21951982	0	1	125	0	3	163	16	72	7.00232	3.11182	-3.1338	0.000811209	0.00451504	ENSMUST00000162103	Dnaja1-ps	UTR3
6495	peak_6495	chr6	82559378	82559603	6.99068	+	82559378	82559603	0	1	225	0	1	159	11	108	8.25698	4.03499	-3.11362	0.0017943	0.00786315	ENSMUST00000203775	Tacr1	UTR3
17572	peak_17572	chr18	37474445	37474620	6.88743	+	37474445	37474620	0	1	175	0	2	162	15	102	7.57066	3.60459	-3.03392	0.00197535	0.00844652	ENSMUST00000050034	Pcdhb15	LastExon
6570	peak_6570	chr6	95127272	95127347	10.5408	+	95127272	95127347	0	1	75	0	7	245	36	122	6.18254	2.72253	-3.02984	4.33583e-05	0.00067127	ENSMUST00000119582	Kbtbd8	UTR3
16826	peak_16826	chr17	49096836	49097311	12.682	+	49096836	49097311	0	1	475	0	10	1123	50	933	7.12673	3.79284	-3.02084	3.30053e-06	0.000152171	ENSMUST00000046254	Lrfn2	LastExon
1818	peak_1818	chr2	155632161	155632261	6.72484	+	155632161	155632261	0	1	100	0	2	133	18	130	6.04078	2.0875	-3.01107	0.0023233	0.00945415	ENSMUST00000092995	Myh7b	Exon
14138	peak_14138	chr13	12472858	12472958	5.56229	-	12472858	12472958	0	1	100	0	0	94	9	105	7.794	3.65219	-2.96883	0.00700208	0.0211634	ENSMUST00000179308	Edaradd	UTR3
17584	peak_17584	chr18	37491564	37491639	6.42769	+	37491564	37491639	0	1	75	0	2	178	12	101	6.57418	2.52752	-2.95432	0.00309984	0.0116164	ENSMUST00000055949	Pcdhb18	LastExon
14667	peak_14667	chr14	54480055	54480230	9.07802	+	54480055	54480230	0	1	175	0	4	297	27	219	7.45438	3.97636	-2.94478	0.000220875	0.00185031	ENSMUST00000164766	Rem2	UTR3
16805	peak_16805	chr17	46892195	46892420	7.85442	+	46892195	46892420	0	1	225	0	3	231	24	239	7.37977	3.82382	-2.88904	0.000759604	0.00432099	NA	Tbcc	UTR3
7126	peak_7126	chr6	124431433	124431583	15.5037	-	124431433	124431583	0	1	150	0	24	366	76	236	4.25344	1.14628	-2.88731	1.35368e-07	2.15242e-05	ENSMUST00000124998	Clstn3	UTR3
7584	peak_7584	chr7	78899505	78902235	20.1458	+	78899505	78902235	0	2	194,6	0,2724	60	1130	237	854	5.24451	2.20271	-2.8816	1.32565e-09	8.61994e-07	ENSMUST00000172017	Aen	UTR5
16810	peak_16810	chr17	47621194	47621344	11.6021	+	47621194	47621344	0	1	150	0	14	303	34	111	5.58646	2.40047	-2.84496	1.25192e-05	0.00032167	ENSMUST00000120025	Kpna2-ps	UTR3
17592	peak_17592	chr18	37505138	37505213	8.61101	+	37505138	37505213	0	1	75	0	6	184	29	112	6.22192	2.82419	-2.82446	0.000346942	0.00255758	ENSMUST00000052179	Pcdhb20	LastExon
8216	peak_8216	chr7	62464070	62464170	12.2775	-	62464070	62464170	0	1	100	0	13	424	53	295	4.34242	1.23363	-2.80884	5.33012e-06	0.000201423	ENSMUST00000094339	Peg12	LastExon
16025	peak_16025	chr16	25959065	25959340	6.37514	+	25959065	25959340	0	1	275	0	2	239	14	169	8.11223	4.32345	-2.80033	0.00325802	0.0120474	ENSMUST00000161614	Gm4524	UTR5
3415	peak_3415	chr3	73050525	73050700	9.26246	-	73050525	73050700	0	1	175	0	6	290	37	252	6.79035	3.49813	-2.79372	0.000182992	0.00162826	ENSMUST00000059407	Slitrk3	LastExon
6419	peak_6419	chr6	47907047	47907222	14.3637	+	47907047	47907222	0	1	175	0	19	494	72	292	5.95757	2.93377	-2.78951	4.55291e-07	4.74333e-05	ENSMUST00000061890	Zfp282	UTR3
10349	peak_10349	chr9	44247586	44247686	6.03723	-	44247586	44247686	0	1	100	0	1	124	7	58	7.84488	3.57747	-2.75634	0.00452601	0.015227	ENSMUST00000034618	Pdzd3	UTR3
9563	peak_9563	chr8	111866147	111866222	9.56645	-	111866147	111866222	0	1	75	0	8	201	29	114	5.84844	2.65071	-2.73871	0.000130233	0.0013189	ENSMUST00000034431	Tmem170	UTR3
7386	peak_7386	chr7	27879456	27879556	9.59757	+	27879456	27879556	0	1	100	0	11	222	32	99	5.63731	2.47458	-2.71117	0.000125469	0.00129076	ENSMUST00000053722	Zfp607a	LastExon
4763	peak_4763	chr4	132492431	132492481	13.0601	-	132492431	132492481	0	1	50	0	17	264	71	235	4.66105	1.68833	-2.71107	2.12986e-06	0.000117093	ENSMUST00000030724	Sesn2	UTR3
6379	peak_6379	chr6	36525536	36525736	5.66147	+	36525536	36525736	0	1	200	0	0	149	6	107	8.82603	5.09825	-2.7056	0.00639544	0.0197573	ENSMUST00000172278	Chrm2	UTR3
14518	peak_14518	chr13	119712443	119712718	21.1843	-	119712443	119712718	0	1	275	0	39	730	118	458	5.37462	2.52912	-2.70521	4.67329e-10	4.1964e-07	ENSMUST00000178142	Nim1k	LastExon
12971	peak_12971	chr11	105166375	105166550	7.60758	-	105166375	105166550	0	1	175	0	3	150	58	482	6.11461	2.78825	-2.69587	0.000969068	0.00512731	ENSMUST00000118770	Gm11620	UTR3
11913	peak_11913	chr11	59879757	59879932	5.5605	+	59879757	59879932	0	1	175	0	0	122	7	106	8.61693	4.8557	-2.68211	0.00701523	0.0211895	ENSMUST00000154699	Nt5m	UTR5
11009	peak_11009	chr10	79689019	79689094	7.36611	+	79689019	79689094	0	1	75	0	5	174	17	88	5.84363	2.4228	-2.68125	0.00123355	0.00606149	ENSMUST00000020549	Gzmm	UTR5
6469	peak_6469	chr6	63256625	63256800	9.70307	+	63256625	63256800	0	1	175	0	10	309	32	188	5.96074	2.8968	-2.63825	0.000111658	0.00119973	ENSMUST00000203667	9330118I20Rik	UTR3
8369	peak_8369	chr7	102559271	102559471	5.59734	-	102559271	102559471	0	1	200	0	0	103	10	175	8.21833	4.66312	-2.58271	0.00678909	0.0206554	ENSMUST00000106913	Trim21	LastExon
3230	peak_3230	chr3	137626042	137626492	23.5789	+	137626042	137626492	0	1	450	0	63	1070	229	874	5.3036	2.61022	-2.578	3.80909e-11	7.98088e-08	ENSMUST00000053855	Ddit4l	LastExon
3200	peak_3200	chr3	127797126	127797401	8.7037	+	127797126	127797401	0	1	275	0	6	273	25	188	6.73817	3.69572	-2.55245	0.000318738	0.00239842	ENSMUST00000171621	Tifa	LastExon
7256	peak_7256	chr7	12983339	12983689	9.17243	+	12983339	12983689	0	1	350	0	7	700	23	403	7.85983	4.87762	-2.53552	0.000201715	0.0017331	ENSMUST00000108536	Zfp446	UTR3
13602	peak_13602	chr12	71015653	71015828	5.41816	-	71015653	71015828	0	1	175	0	0	146	6	143	8.11846	4.43388	-2.5258	0.00803166	0.0233868	ENSMUST00000136690	3110056K07Rik	UTR3
1530	peak_1530	chr2	92953822	92954047	6.09401	+	92953822	92954047	0	1	225	0	2	190	19	228	7.81696	4.41579	-2.50741	0.00428613	0.0146393	ENSMUST00000028648	Syt13	UTR3
12306	peak_12306	chr11	106073179	106073554	17.3933	+	106073179	106073554	0	1	375	0	42	1276	94	662	6.0299	3.37721	-2.4939	1.87912e-08	5.80894e-06	ENSMUST00000002048	Taco1	LastExon
17540	peak_17540	chr18	37309804	37310029	7.54903	+	37309804	37310029	0	1	225	0	4	294	23	284	7.45069	4.38022	-2.47432	0.00102957	0.00533967	ENSMUST00000056712	Pcdhb4	LastExon
9656	peak_9656	chr8	125887024	125887274	11.7287	-	125887024	125887274	0	1	250	0	26	735	57	381	5.40191	2.65124	-2.47148	1.03504e-05	0.000294662	ENSMUST00000131127	Pcnx2	Exon
13079	peak_13079	chr11	118392800	118392975	6.30112	-	118392800	118392975	0	1	175	0	1	108	20	219	7.6662	4.11169	-2.46918	0.00350447	0.0126816	ENSMUST00000043722	Lgals3bp	UTR3
15666	peak_15666	chr15	76715400	76715500	9.63948	-	76715400	76715500	0	1	100	0	14	294	31	139	4.89604	2.04391	-2.45887	0.000120479	0.00125379	ENSMUST00000127208	Lrrc14	UTR3
16105	peak_16105	chr16	38005821	38005996	5.9796	+	38005821	38005996	0	1	175	0	5	367	19	155	7.28733	3.63741	-2.44678	0.00478472	0.0158475	ENSMUST00000061274	Gpr156	UTR3
7716	peak_7716	chr7	105652029	105652304	9.18296	+	105652029	105652304	0	1	275	0	9	309	32	224	6.05777	3.19923	-2.43515	0.000198869	0.00172049	ENSMUST00000142363	Gm45799	UTR3
4182	peak_4182	chr4	134523177	134523702	17.7517	+	134523177	134523702	0	1	525	0	93	3230	214	1907	6.19581	3.62524	-2.4225	1.33114e-08	4.53097e-06	ENSMUST00000105866	Aunip	LastExon
2134	peak_2134	chr2	31638169	31638344	6.1083	-	31638169	31638344	0	1	175	0	1	235	10	259	8.36757	4.75442	-2.42072	0.00422581	0.014495	ENSMUST00000145389	Gm13425	UTR3
5964	peak_5964	chr5	106452713	106452863	5.88896	-	106452713	106452863	0	1	150	0	2	145	21	186	7.39529	4.03388	-2.41846	0.00520921	0.0168751	ENSMUST00000086795	Barhl2	UTR3
7837	peak_7837	chr7	128270818	128271100	6.00187	+	128270818	128271100	0	2	134,66	0,216	3	243	15	188	6.74253	3.36531	-2.3894	0.00469043	0.0156047	ENSMUST00000206703	Slc5a2	Exon
4176	peak_4176	chr4	133591478	133591703	19.1691	+	133591478	133591703	0	1	225	0	51	1894	126	1160	6.44827	3.92648	-2.38491	3.93095e-09	1.69641e-06	ENSMUST00000030661	Gpn2	UTR3
15284	peak_15284	chr15	76715502	76715627	7.59316	+	76715502	76715627	0	1	125	0	11	323	31	185	5.16855	2.18438	-2.38127	0.000984575	0.00517884	ENSMUST00000127208	Lrrc14	UTR3
477	peak_477	chr1	175901010	175901260	15.5037	+	175901010	175901260	0	1	250	0	98	1277	175	648	4.30914	1.76476	-2.37271	1.35832e-07	2.15242e-05	ENSMUST00000039725	Exo1	Exon
13509	peak_13509	chr12	20876763	20876988	11.9053	-	20876763	20876988	0	1	225	0	22	544	50	319	5.72746	3.12628	-2.34692	8.45229e-06	0.000260707	ENSMUST00000127917	3110053B16Rik	UTR3
11464	peak_11464	chr10	79612756	79612956	6.71768	-	79612756	79612956	0	1	200	0	4	273	15	201	5.91475	2.84611	-2.34563	0.00233808	0.0095012	ENSMUST00000178228	C2cd4c	LastExon
2972	peak_2972	chr3	88055825	88055993	13.8446	+	88055825	88055993	0	1	168	0	60	794	121	396	4.93027	2.39223	-2.3405	8.0748e-07	6.79761e-05	ENSMUST00000193398	Gpatch4	UTR3
8361	peak_8361	chr7	101899497	101899547	6.82674	-	101899497	101899547	0	1	50	0	8	168	19	70	5.50069	2.41381	-2.33914	0.0021032	0.00880941	ENSMUST00000106969	Tomt	UTR3
17927	peak_17927	chr18	46465293	46465443	7.78743	-	46465293	46465443	0	1	150	0	8	205	40	212	5.58836	2.70053	-2.33422	0.000813966	0.00452638	ENSMUST00000180618	Mospd4	UTR3
14833	peak_14833	chr14	111681153	111682228	31.9181	+	111681153	111682228	0	1	1075	0	418	19124	862	11916	6.25114	3.84494	-2.33412	1.30684e-14	2.4643e-10	ENSMUST00000042767	Slitrk5	LastExon
13716	peak_13716	chr12	91639616	91639666	7.37793	-	91639616	91639666	0	1	50	0	12	261	25	114	4.90678	1.94946	-2.33336	0.00121854	0.00601204	ENSMUST00000052969	Ston2	UTR3
12381	peak_12381	chr11	117839309	117839584	8.964	+	117839309	117839584	0	1	275	0	9	479	20	225	6.87361	4.12975	-2.32974	0.00024559	0.00200247	ENSMUST00000073388	Afmid	UTR3
15691	peak_15691	chr15	78672696	78672796	9.23819	-	78672696	78672796	0	1	100	0	21	409	37	182	4.6418	1.91781	-2.32403	0.000187742	0.00165587	ENSMUST00000088592	Elfn2	LastExon
5500	peak_5500	chr5	127707071	127707546	14.5146	+	127707071	127707546	0	1	475	0	52	1278	99	650	5.74364	3.24254	-2.31895	3.82907e-07	4.27247e-05	ENSMUST00000118139	Glt1d1	UTR3
494	peak_494	chr1	179627094	179627269	9.76251	+	179627094	179627269	0	1	175	0	22	347	48	166	5.06961	2.40602	-2.31229	0.000104148	0.00115131	ENSMUST00000040706	Cnst	UTR3
9252	peak_9252	chr8	25980628	25980878	8.21224	-	25980628	25980878	0	1	250	0	10	318	28	172	6.22266	3.42778	-2.31076	0.000534605	0.00337187	ENSMUST00000061850	Pomk	UTR3
1499	peak_1499	chr2	85190434	85191937	7.25164	+	85190434	85191937	0	2	70,5	0,1498	7	162	16	66	5.72179	2.78288	-2.31003	0.00138604	0.00656203	ENSMUST00000234267	Lrrc55	UTR3
590	peak_590	chr1	23844845	23845070	12.0629	-	23844845	23845070	0	1	225	0	48	794	67	258	5.24616	2.7138	-2.29158	6.95036e-06	0.000233729	ENSMUST00000149737	Smap1	UTR3
11463	peak_11463	chr10	79612481	79612631	6.49198	-	79612481	79612631	0	1	150	0	6	229	19	163	5.23303	2.14712	-2.28771	0.00292291	0.0111101	ENSMUST00000178228	C2cd4c	LastExon
1559	peak_1559	chr2	107295469	107295744	7.0872	+	107295469	107295744	0	1	275	0	6	336	14	143	7.00089	4.06784	-2.28659	0.00163852	0.00735428	ENSMUST00000037012	Kcna4	LastExon
12328	peak_12328	chr11	113470627	113470802	5.65996	+	113470627	113470802	0	1	175	0	1	174	4	49	8.39249	4.29858	-2.27748	0.00640528	0.019778	ENSMUST00000105048	Gm16487	UTR5
13265	peak_13265	chr12	72794226	72794276	16.0013	+	72794226	72794276	0	1	50	0	92	661	151	310	3.88562	1.45558	-2.27377	8.48861e-08	1.52447e-05	ENSMUST00000021514	Ppm1a	UTR3
10699	peak_10699	chr9	108578925	108579125	10.0938	-	108578925	108579125	0	1	200	0	17	404	43	289	4.86089	2.2725	-2.26918	7.2111e-05	0.000915073	ENSMUST00000006853	P4htm	UTR3
6609	peak_6609	chr6	115676744	115676844	5.14995	+	115676744	115676844	0	1	100	0	0	135	6	132	7.2063	3.46637	-2.265	0.0102491	0.028165	ENSMUST00000203121	D830050J10Rik	UTR5
6492	peak_6492	chr6	81959219	81959419	12.9292	+	81959219	81959419	0	1	200	0	48	574	125	372	4.79104	2.31586	-2.26355	2.4959e-06	0.000128206	ENSMUST00000032124	Mrpl19	UTR3
17575	peak_17575	chr18	37478917	37479042	5.92549	+	37478917	37479042	0	1	125	0	3	118	15	83	6.56494	3.38853	-2.25959	0.0050423	0.0164531	ENSMUST00000051442	Pcdhb16	LastExon
12554	peak_12554	chr11	36041613	36046895	12.5907	-	36041613	36046895	0	2	71129	0,5153	73	905	97	344	4.47869	2.00233	-2.25783	3.65382e-06	0.000162118	ENSMUST00000057207	Tenm2	Exon
15522	peak_15522	chr15	33685700	33685975	9.9315	-	33685700	33685975	0	1	275	0	15	460	37	264	6.16359	3.57785	-2.25234	8.66179e-05	0.00102405	ENSMUST00000042021	Tspyl5	UTR3
18226	peak_18226	chr19	21684212	21684337	11.1865	+	21684212	21684337	0	1	125	0	28	382	78	250	5.04772	2.52891	-2.24942	2.01907e-05	0.00042908	ENSMUST00000235332	Abhd17b	UTR3
2801	peak_2801	chr3	9281694	9281869	9.28746	+	9281694	9281869	0	1	175	0	11	269	35	161	5.79515	3.17627	-2.24851	0.000177535	0.00160028	ENSMUST00000155203	Zbtb10	UTR3
17593	peak_17593	chr18	37505688	37506288	9.88317	+	37505688	37506288	0	1	600	0	17	865	44	629	6.19968	3.62102	-2.24731	9.09166e-05	0.00105893	ENSMUST00000052179	Pcdhb20	LastExon
17557	peak_17557	chr18	37401829	37401904	5.08916	+	37401829	37401904	0	1	75	0	0	69	8	59	7.6987	3.72067	-2.24635	0.010871	0.0293772	ENSMUST00000057228	Pcdhb9	LastExon
17583	peak_17583	chr18	37491464	37491539	5.22969	+	37491464	37491539	0	1	75	0	2	153	8	82	6.26357	2.61684	-2.24422	0.00952706	0.0266506	ENSMUST00000055949	Pcdhb18	LastExon
17553	peak_17553	chr18	37355920	37355970	5.21057	+	37355920	37355970	0	1	50	0	2	116	15	109	6.59113	2.98703	-2.24379	0.00969744	0.0270062	ENSMUST00000051163	Pcdhb8	LastExon
8146	peak_8146	chr7	42473735	42473785	5.57309	-	42473735	42473785	0	1	50	0	3	146	12	68	6.81874	3.40385	-2.24134	0.00693311	0.0210054	ENSMUST00000174407	Zfp141	UTR3
1599	peak_1599	chr2	119038338	119039013	22.068	+	119038338	119039013	0	1	675	0	186	9342	380	5665	6.71187	4.37406	-2.23756	1.30455e-10	2.27445e-07	ENSMUST00000028796	Rpusd2	LastExon
12426	peak_12426	chr11	121206032	121206207	5.5574	+	121206032	121206207	0	1	175	0	1	90	8	53	7.46406	3.6462	-2.23442	0.00703446	0.0212352	ENSMUST00000124925	Hexdc	UTR5
6203	peak_6203	chr5	137501512	137501987	20.5419	-	137501512	137501987	0	1	475	0	157	2968	358	2089	4.9523	2.60743	-2.23281	7.98968e-10	6.55049e-07	ENSMUST00000031728	Pop7	UTR3
11134	peak_11134	chr10	93845826	93845951	5.43717	+	93845826	93845951	0	1	125	0	3	149	6	35	6.87004	3.28734	-2.23217	0.0078751	0.0230806	ENSMUST00000095333	Usp44	UTR5
9037	peak_9037	chr8	109941147	109941547	13.3635	+	109941147	109941547	0	1	400	0	79	1740	137	775	5.72705	3.30178	-2.23001	1.42396e-06	9.48823e-05	ENSMUST00000034175	Phlpp2	UTR3
18487	peak_18487	chr19	5892038	5892288	11.0553	-	5892038	5892288	0	1	250	0	32	914	69	547	5.24695	2.74543	-2.22992	2.41222e-05	0.00046991	ENSMUST00000236767	Tigd3	LastExon
5111	peak_5111	chr5	33419415	33419640	9.20944	+	33419415	33419640	0	1	225	0	13	445	45	276	6.15592	3.55581	-2.224	0.000193402	0.0016892	ENSMUST00000202816	Uvssa	UTR3
3152	peak_3152	chr3	106732002	106732177	10.9558	+	106732002	106732177	0	1	175	0	22	346	60	189	5.14676	2.6499	-2.22302	2.7417e-05	0.000503483	ENSMUST00000106737	Lrif1	UTR5
14627	peak_14627	chr14	46853902	46854193	15.0249	+	46853902	46854193	0	1	291	0	48	1546	147	1376	6.11492	3.73204	-2.2184	2.24289e-07	2.99959e-05	ENSMUST00000068532	Cgrrf1	LastExon
3242	peak_3242	chr3	142892174	142892374	6.89742	+	142892174	142892374	0	1	200	0	5	178	24	151	6.33313	3.48037	-2.21812	0.00195815	0.0083882	ENSMUST00000181882	9530052C20Rik	UTR5
2588	peak_2588	chr2	156872981	156873231	18.2264	-	156872981	156873231	0	1	250	0	72	932	176	629	4.95702	2.61289	-2.21503	8.8186e-09	3.26063e-06	ENSMUST00000109561	Sla2	UTR3
2820	peak_2820	chr3	27241724	27242299	9.4803	+	27241724	27242299	0	1	575	0	8	827	36	852	7.92307	5.36744	-2.21284	0.000143082	0.00140005	ENSMUST00000046515	Nceh1	LastExon
8800	peak_8800	chr8	69824045	69824270	10.4888	+	69824045	69824270	0	1	225	0	19	557	49	415	5.08497	2.58451	-2.20793	4.57615e-05	0.000695907	ENSMUST00000034325	Lpar2	Exon
15055	peak_15055	chr14	65921069	65921119	9.11571	-	65921069	65921119	0	1	50	0	18	338	43	221	4.16566	1.58206	-2.20759	0.000213173	0.0018026	ENSMUST00000042046	Scara3	LastExon
6189	peak_6189	chr5	136231713	136231913	16.648	-	136231713	136231913	0	1	200	0	76	1319	129	730	3.8408	1.49221	-2.20653	3.87284e-08	9.73734e-06	ENSMUST00000196447	Sh2b2	Exon
8591	peak_8591	chr7	141426445	141426570	8.08992	-	141426445	141426570	0	1	125	0	9	203	30	172	5.12818	2.4646	-2.20033	0.000601613	0.00367021	ENSMUST00000164387	Cend1	UTR3
18944	peak_18944	chrX	164423175	164423350	9.72945	+	164423175	164423350	0	1	175	0	13	355	30	171	5.98153	3.45217	-2.1994	0.00010801	0.001178	ENSMUST00000112255	Piga	Exon
770	peak_770	chr1	84912438	84912988	14.0585	-	84912438	84912988	0	1	550	0	106	3422	126	1194	5.99255	3.61669	-2.19878	6.24728e-07	5.86095e-05	ENSMUST00000027422	Slc16a14	Exon
14154	peak_14154	chr13	21467246	21467471	6.02512	-	21467246	21467471	0	1	225	0	3	153	20	170	6.90603	3.92146	-2.18874	0.00458381	0.0153553	ENSMUST00000068235	Nkapl	UTR3
15991	peak_15991	chr16	18501236	18538469	19.1998	+	18501236	18538469	0	2	422,78	0,37155	59	3531	136	2573	6.70712	4.39538	-2.18566	3.34648e-09	1.66065e-06	ENSMUST00000146673	Rtl10	LastExon
954	peak_954	chr1	139337037	139337087	6.50673	-	139337037	139337087	0	1	50	0	6	103	17	57	5.28161	2.35894	-2.18409	0.00287627	0.0109971	ENSMUST00000196402	Crb1	Exon
13487	peak_13487	chr12	5080946	5081146	14.0655	-	5080946	5081146	0	1	200	0	73	1019	98	398	4.81777	2.46256	-2.17993	6.15504e-07	5.83244e-05	ENSMUST00000218384	Klhl29	UTR3
4524	peak_4524	chr4	70222530	70222830	15.5384	-	70222530	70222830	0	1	300	0	70	1240	107	581	5.16117	2.83128	-2.17693	1.30375e-07	2.10126e-05	ENSMUST00000144099	Cdk5rap2	UTR3
18696	peak_18696	chrX	9309674	9309999	12.0555	+	9309674	9309999	0	1	325	0	46	929	81	433	5.56805	3.1674	-2.1753	7.10481e-06	0.000234932	ENSMUST00000015486	Xk	LastExon
2736	peak_2736	chr2	175167429	175167654	10.7986	-	175167429	175167654	0	1	225	0	15	450	56	391	6.12957	3.68537	-2.17153	3.28093e-05	0.00056142	ENSMUST00000109054	Gm14443	UTR3
17545	peak_17545	chr18	37335345	37335595	6.57639	+	37335345	37335595	0	1	250	0	5	311	22	304	6.61208	3.74447	-2.16968	0.00268589	0.0104787	ENSMUST00000061717	Pcdhb6	LastExon
7889	peak_7889	chr7	143847301	143847526	14.2629	+	143847301	143847526	0	1	225	0	74	2262	156	1535	5.39764	3.05806	-2.16842	5.12545e-07	5.08687e-05	ENSMUST00000207143	Dhcr7	LastExon
17588	peak_17588	chr18	37497896	37498646	12.4591	+	37497896	37498646	0	1	750	0	28	1484	97	1338	6.97293	4.59793	-2.16369	4.39674e-06	0.000177595	ENSMUST00000059571	Pcdhb19	LastExon
16837	peak_16837	chr17	55510306	55510581	18.7549	+	55510306	55510581	0	1	275	0	77	1700	109	649	5.71109	3.42669	-2.16333	5.51449e-09	2.26058e-06	ENSMUST00000025000	St6gal2	LastExon
9035	peak_9035	chr8	109939872	109940222	19.4666	+	109939872	109940222	0	1	350	0	70	2159	143	1432	5.80548	3.52831	-2.1614	2.65916e-09	1.38024e-06	ENSMUST00000034175	Phlpp2	LastExon
2721	peak_2721	chr2	172042414	172042589	5.26695	-	172042414	172042589	0	1	175	0	2	193	17	286	7.04153	3.78087	-2.1586	0.00921802	0.0259711	ENSMUST00000087950	Cbln4	UTR5
6549	peak_6549	chr6	90466740	90467115	13.9438	+	90466740	90467115	0	1	375	0	52	1589	130	1311	5.10146	2.77172	-2.15294	7.168e-07	6.34586e-05	ENSMUST00000203607	Klf15	Exon
14972	peak_14972	chr14	54568693	54568893	16.7167	-	54568693	54568893	0	1	200	0	122	1171	254	746	4.24988	1.96209	-2.15268	3.59432e-08	9.28467e-06	ENSMUST00000226463	Ajuba	UTR3
14832	peak_14832	chr14	111680628	111680978	18.1393	+	111680628	111680978	0	1	350	0	94	1916	203	1367	5.24123	2.9633	-2.15245	9.58612e-09	3.46355e-06	ENSMUST00000042767	Slitrk5	LastExon
2983	peak_2983	chr3	88726105	88726230	9.91944	+	88726105	88726230	0	1	125	0	22	375	34	159	5.22304	2.75742	-2.1523	8.75643e-05	0.00103265	ENSMUST00000170377	Rit1	UTR3
1948	peak_1948	chr2	180500600	180500650	6.08169	+	180500600	180500650	0	1	50	0	7	185	11	53	5.61496	2.58508	-2.1513	0.00433386	0.0147649	ENSMUST00000170448	Ntsr1	Exon
2287	peak_2287	chr2	91195101	91196030	5.56087	-	91195101	91196030	0	2	50125	0,804	1	142	8	108	8.09316	4.50757	-2.14738	0.00701234	0.0211842	ENSMUST00000131634	Gm13783	UTR3
17596	peak_17596	chr18	37514276	37514451	7.37961	+	37514276	37514451	0	1	175	0	9	296	31	205	6.29462	3.61894	-2.1383	0.00121648	0.00600503	ENSMUST00000061405	Pcdhb21	LastExon
1404	peak_1404	chr2	49947720	49947970	6.49592	+	49947720	49947970	0	1	250	0	5	337	10	133	7.24361	4.40955	-2.13451	0.00291024	0.0110798	ENSMUST00000028103	Lypd6b	UTR3
4519	peak_4519	chr4	65381127	65381377	6.60514	-	65381127	65381377	0	1	250	0	5	214	27	236	6.59067	3.7953	-2.13179	0.00260763	0.010272	ENSMUST00000084496	Astn2	UTR3
9371	peak_9371	chr8	70650235	70650560	23.5789	-	70650235	70650560	0	1	325	0	232	2946	456	1963	4.49326	2.27852	-2.12794	2.01327e-11	7.98088e-08	ENSMUST00000211715	Pgpep1	UTR3
4798	peak_4798	chr4	134746359	134746684	7.43813	-	134746359	134746684	0	1	325	0	8	294	26	242	5.81695	3.17605	-2.12643	0.00114764	0.00576634	ENSMUST00000037828	Ldlrap1	UTR3
9973	peak_9973	chr9	86574231	86574531	6.83518	+	86574231	86574531	0	1	300	0	6	251	19	175	6.5997	3.86404	-2.11925	0.00208489	0.00875803	ENSMUST00000179212	Rwdd2a	LastExon
1301	peak_1301	chr2	28905037	28905287	11.6259	+	28905037	28905287	0	1	250	0	50	1001	104	582	5.56371	3.21443	-2.1177	1.20185e-05	0.000316413	ENSMUST00000113853	Ddx31	UTR3
16834	peak_16834	chr17	52978187	52978412	5.623	+	52978187	52978412	0	1	225	0	1	286	7	219	9.05034	5.60835	-2.11645	0.00662478	0.0202912	ENSMUST00000184279	Kcnh8	UTR5
4290	peak_4290	chr4	152012588	152015394	7.83558	+	152012588	152015394	0	3	117,73,60	0,1718,2746	11	327	27	217	5.33308	2.74875	-2.115	0.000774245	0.00437779	ENSMUST00000097773	Klhl21	Exon
14620	peak_14620	chr14	35580858	35580933	5.03696	+	35580858	35580933	0	1	75	0	2	109	11	67	6.96574	3.31106	-2.11272	0.0113899	0.0304596	ENSMUST00000043349	Grid1	UTR3
17134	peak_17134	chr17	33949938	33950013	6.11843	-	33949938	33950013	0	1	75	0	4	129	20	136	5.95965	3.07169	-2.1082	0.00418594	0.0143935	ENSMUST00000087543	B3galt4	UTR3
14795	peak_14795	chr14	75525836	75526136	13.2143	+	75525836	75526136	0	1	300	0	123	2429	151	1005	4.83877	2.55076	-2.10277	1.70182e-06	0.000105217	ENSMUST00000164848	Siah3	LastExon
10975	peak_10975	chr10	75015620	75015970	12.3193	+	75015620	75015970	0	1	350	0	21	1482	57	1204	7.26005	4.95266	-2.10129	5.02894e-06	0.000195668	ENSMUST00000159991	Gnaz	UTR3
9905	peak_9905	chr9	65238386	65238511	6.64138	+	65238386	65238511	0	1	125	0	9	188	21	95	5.6319	2.8625	-2.10054	0.00252045	0.0100172	ENSMUST00000213396	Parp16	UTR3
13418	peak_13418	chr12	108836972	108837068	6.22558	+	108836972	108837068	0	1	96	0	7	240	20	145	5.24398	2.35607	-2.10017	0.00376867	0.0133633	ENSMUST00000083495	Mir345	UTR5
13071	peak_13071	chr11	117815650	117815950	15.0005	-	117815650	117815950	0	1	300	0	217	4622	385	2809	4.99852	2.74691	-2.10014	2.32963e-07	3.05068e-05	ENSMUST00000141939	Tk1	UTR3
18608	peak_18608	chr19	45005213	45005738	23.5789	-	45005213	45005738	0	1	525	0	363	4482	809	3157	4.80558	2.61766	-2.09997	3.67329e-11	7.98088e-08	ENSMUST00000097715	Mrpl43	UTR3
1758	peak_1758	chr2	148675511	148676011	23.5789	+	148675511	148676011	0	1	500	0	309	12616	655	8249	6.5646	4.37763	-2.09927	3.37388e-11	7.98088e-08	ENSMUST00000047177	Nxt1	LastExon
1834	peak_1834	chr2	156550822	156550972	10.0373	+	156550822	156550972	0	1	150	0	42	578	93	384	4.27768	1.88565	-2.09676	7.67062e-05	0.000951611	ENSMUST00000150212	Aar2	LastExon
17437	peak_17437	chr18	24004586	24004661	16.4731	+	24004586	24004661	0	1	75	0	120	762	205	393	3.87872	1.64894	-2.09562	4.66367e-08	1.09928e-05	ENSMUST00000074941	Zfp35	UTR3
10735	peak_10735	chr9	119972790	119973040	7.07298	-	119972790	119973040	0	1	250	0	7	298	29	320	5.71005	3.05205	-2.09555	0.0016587	0.00742713	ENSMUST00000214058	Csrnp1	LastExon
6000	peak_6000	chr5	112914527	112914802	8.70569	-	112914527	112914802	0	1	275	0	13	795	33	573	6.44482	3.97378	-2.09128	0.000318044	0.00239511	ENSMUST00000200332	Grk3	UTR3
2216	peak_2216	chr2	62787689	62787739	7.64869	-	62787689	62787739	0	1	50	0	24	506	26	100	5.49498	2.91542	-2.08869	0.000930749	0.00498329	ENSMUST00000112452	Kcnh7	LastExon
8106	peak_8106	chr7	30355513	30355638	9.18296	-	30355513	30355638	0	1	125	0	17	521	42	387	5.00284	2.57052	-2.08847	0.000198901	0.00172049	ENSMUST00000046351	Lrfn3	UTR3
11749	peak_11749	chr11	22519041	22519216	7.03147	+	22519041	22519216	0	1	175	0	6	380	22	242	7.04473	4.39739	-2.08696	0.00172271	0.00764395	ENSMUST00000059319	Tmem17	UTR3
7585	peak_7585	chr7	78902585	78905922	21.3534	+	78902585	78905922	0	2	245,80	0,3257	225	3674	532	3218	4.36786	2.18878	-2.08343	2.37511e-10	3.73229e-07	ENSMUST00000138167	Aen	LastExon
6849	peak_6849	chr6	41624237	41624633	6.28391	-	41624237	41624633	0	2	123,52	0,344	8	240	15	90	5.98517	3.13207	-2.08154	0.00356285	0.0128338	ENSMUST00000201471	Trpv6	Exon
10272	peak_10272	chr9	21288837	21289012	15.7742	-	21288837	21289012	0	1	175	0	99	933	198	595	4.36692	2.15206	-2.08071	1.05039e-07	1.78444e-05	ENSMUST00000086374	Cdkn2d	UTR3
17594	peak_17594	chr18	37506388	37506838	9.97141	+	37506388	37506838	0	1	450	0	18	954	46	712	6.86521	4.49771	-2.07254	8.23001e-05	0.000996106	ENSMUST00000052179	Pcdhb20	LastExon
11504	peak_11504	chr10	80834181	80834331	5.60116	-	80834181	80834331	0	1	150	0	4	173	10	77	6.56062	3.43485	-2.07229	0.00676238	0.0206007	ENSMUST00000053986	Lingo3	UTR3
6655	peak_6655	chr6	121193793	121194043	9.66913	+	121193793	121194043	0	1	250	0	17	423	67	497	5.4938	3.12232	-2.06463	0.000116335	0.00122829	ENSMUST00000120066	Pex26	UTR3
1041	peak_1041	chr1	163386058	163386508	13.9438	-	163386058	163386508	0	1	450	0	56	2414	109	1471	6.572	4.34285	-2.06369	7.14501e-07	6.34586e-05	ENSMUST00000186402	Gorab	UTR3
603	peak_603	chr1	33746233	33746408	10.8361	-	33746233	33746408	0	1	175	0	47	1000	89	563	5.57002	3.26589	-2.05949	3.14217e-05	0.000547015	ENSMUST00000044691	Bag2	UTR3
5932	peak_5932	chr5	92645659	92648857	6.81408	-	92645659	92648857	0	2	41209	0,2989	7	266	24	222	6.31252	3.65412	-2.05872	0.00212928	0.00888706	ENSMUST00000060930	Ccdc158	Exon
8208	peak_8208	chr7	51860976	51861751	20.1458	-	51860976	51861751	0	1	775	0	237	10802	455	7368	6.24108	4.08137	-2.05778	1.28744e-09	8.61994e-07	ENSMUST00000169357	Fancf	UTR3
16574	peak_16574	chr17	21561141	21561216	6.22904	+	21561141	21561216	0	1	75	0	5	156	19	105	6.17473	3.38967	-2.05619	0.00375189	0.0133313	ENSMUST00000079242	Zfp52	LastExon
10625	peak_10625	chr9	100458418	100459118	11.1265	-	100458418	100459118	0	1	700	0	28	1301	71	1038	6.59773	4.3101	-2.0544	2.18039e-05	0.000447301	ENSMUST00000125259	Il20rb	UTR3
6539	peak_6539	chr6	86989067	86989117	11.8854	+	86989067	86989117	0	1	50	0	73	591	94	234	4.14183	1.88407	-2.04855	8.62086e-06	0.000264331	ENSMUST00000003710	Aak1	UTR3
8130	peak_8130	chr7	35547634	35547959	15.7002	-	35547634	35547959	0	1	325	0	100	1897	170	946	5.49244	3.30449	-2.04842	1.13759e-07	1.87835e-05	ENSMUST00000142930	Nudt19	UTR3
152	peak_152	chr1	63302817	63303342	21.3528	+	63302817	63303342	0	1	525	0	360	3936	600	2040	4.68972	2.5486	-2.04519	3.21468e-10	3.73396e-07	ENSMUST00000029025	Zdbf2	LastExon
10729	peak_10729	chr9	119484907	119485732	12.7253	-	119484907	119485732	0	1	825	0	78	2464	141	1581	5.6068	3.37677	-2.04008	3.13903e-06	0.000147669	ENSMUST00000120420	Scn5a	UTR3
2370	peak_2370	chr2	119270100	119270275	4.99676	-	119270100	119270275	0	1	175	0	2	244	7	120	7.54459	4.07965	-2.03884	0.0117976	0.0313202	ENSMUST00000037360	Rhov	LastExon
2274	peak_2274	chr2	84871923	84872123	12.0699	-	84871923	84872123	0	1	200	0	116	3679	116	1180	4.37867	2.13834	-2.03803	6.8249e-06	0.000232595	ENSMUST00000151799	Rtn4rl2	UTR3
6126	peak_6126	chr5	127596263	127596638	12.9313	-	127596263	127596638	0	1	375	0	69	3039	150	2221	6.27177	4.05482	-2.03472	2.45765e-06	0.000128022	ENSMUST00000153832	Slc15a4	UTR3
13335	peak_13335	chr12	85226343	85226493	9.40832	+	85226343	85226493	0	1	150	0	31	303	47	136	4.38661	2.03527	-2.03399	0.000155043	0.00147168	ENSMUST00000004910	Eif2b2	UTR3
4568	peak_4568	chr4	97568382	97568782	16.5153	-	97568382	97568782	0	1	400	0	604	12490	669	3545	5.51126	3.35186	-2.03158	4.41583e-08	1.06755e-05	ENSMUST00000148653	E130114P18Rik	UTR3
10168	peak_10168	chr9	121760057	121760132	4.95799	+	121760057	121760132	0	1	75	0	2	118	14	120	5.20801	1.86015	-2.02845	0.0122418	0.0321734	ENSMUST00000093772	Zfp651	UTR5
8023	peak_8023	chr7	25090802	25091077	7.85508	-	25090802	25091077	0	1	275	0	8	402	35	460	6.85575	4.39811	-2.0263	0.00075881	0.00431901	ENSMUST00000108415	Pou2f2	UTR3
7170	peak_7170	chr6	134717672	134719047	22.068	-	134717672	134719047	0	1	1375	0	725	18374	1007	8798	5.75313	3.63701	-2.02579	1.32677e-10	2.27445e-07	ENSMUST00000204083	Dusp16	UTR3
870	peak_870	chr1	131129440	131129815	14.4584	-	131129440	131129815	0	1	375	0	162	2363	314	1552	4.88615	2.71071	-2.0239	4.07533e-07	4.44211e-05	ENSMUST00000016670	Dyrk3	LastExon
8014	peak_8014	chr7	24229072	24229597	11.6133	-	24229072	24229597	0	1	525	0	24	1036	62	821	6.62423	4.38378	-2.02363	1.22041e-05	0.000319185	ENSMUST00000037448	Zfp109	LastExon
7401	peak_7401	chr7	28817380	28817859	8.82001	+	28817380	28817859	0	2	24,26	0,453	30	434	62	241	5.05108	2.67453	-2.02234	0.000284662	0.00221264	ENSMUST00000173578	Hnrnpl	UTR5
9579	peak_9579	chr8	116970623	116970873	6.71346	-	116970623	116970873	0	1	250	0	7	343	22	281	6.64551	4.03195	-2.01488	0.00234978	0.00952899	ENSMUST00000070577	1700030J22Rik	UTR3
12512	peak_12512	chr11	21995388	21995963	18.2264	-	21995388	21995963	0	1	575	0	369	9441	508	4337	5.85306	3.72181	-2.0125	8.5166e-09	3.26063e-06	ENSMUST00000172395	Otx1	UTR3
18316	peak_18316	chr19	42147424	42147599	6.11214	+	42147424	42147599	0	1	175	0	4	207	31	376	5.04314	2.34003	-2.01193	0.00420961	0.0144565	ENSMUST00000061111	Marveld1	UTR5
3813	peak_3813	chr4	42715100	42715500	14.0678	+	42715100	42715500	0	1	400	0	141	1607	223	785	4.758	2.5935	-2.0081	6.11439e-07	5.82319e-05	ENSMUST00000194137	Gm21955	UTR5
32	peak_32	chr1	23845255	23845455	7.37674	+	23845255	23845455	0	1	200	0	52	1110	56	306	5.4664	2.96269	-2.00365	0.00122146	0.00601702	ENSMUST00000149737	Smap1	UTR3
4831	peak_4831	chr4	139102038	139102338	10.2184	-	139102038	139102338	0	1	300	0	23	1079	44	607	6.75642	4.4866	-2.00123	6.19863e-05	0.000839358	ENSMUST00000143971	Minos1	UTR3
17457	peak_17457	chr18	32269991	32270091	9.69804	+	32269991	32270091	0	1	100	0	25	301	61	176	4.77954	2.485	-2.00086	0.000112215	0.00120392	ENSMUST00000025241	Ercc3	UTR3
15057	peak_15057	chr14	65930903	65931578	21.1843	-	65930903	65931578	0	1	675	0	130	4214	269	3208	5.86714	3.77313	-1.99992	4.65426e-10	4.1964e-07	ENSMUST00000042046	Scara3	Exon
18821	peak_18821	chrX	99848381	99848531	7.96933	+	99848381	99848531	0	1	150	0	15	273	33	191	4.53672	2.1214	-1.99735	0.000676491	0.00399018	ENSMUST00000096363	Tmem28	UTR3
5622	peak_5622	chr5	142722276	142722490	14.6697	+	142722276	142722490	0	1	214	0	114	1696	157	869	4.26239	2.1193	-1.99664	3.23529e-07	3.83697e-05	ENSMUST00000058418	Slc29a4	UTR3
8069	peak_8069	chr7	28386345	28386720	11.9923	-	28386345	28386720	0	1	375	0	53	918	107	626	4.91973	2.72464	-1.99402	7.7056e-06	0.000245447	ENSMUST00000003536	Med29	UTR3
17992	peak_17992	chr18	68267786	68267986	12.0623	-	68267786	68267986	0	1	200	0	81	870	143	484	4.69129	2.50263	-1.99296	6.96881e-06	0.000233827	ENSMUST00000042852	Fam210a	UTR3
12682	peak_12682	chr11	68987771	68987996	12.0555	-	68987771	68987996	0	1	225	0	107	1239	162	648	4.32659	2.13879	-1.9901	7.05307e-06	0.000234932	ENSMUST00000146490	Pfas	UTR3
15859	peak_15859	chr15	99427760	99427910	9.49329	-	99427760	99427910	0	1	150	0	28	411	77	387	3.52287	1.23216	-1.9893	0.000141053	0.0013875	ENSMUST00000159738	Nckap5los	UTR5
9521	peak_9521	chr8	106009615	106010340	16.8843	-	106009615	106010340	0	1	725	0	152	4242	309	2939	5.94278	3.83623	-1.98542	3.02484e-08	8.26658e-06	ENSMUST00000058579	Ddx28	UTR3
4252	peak_4252	chr4	147187932	147188157	10.6571	+	147187932	147188157	0	1	225	0	47	605	114	464	4.78871	2.56025	-1.98502	3.80623e-05	0.000619276	ENSMUST00000118508	Gm13146	UTR5
15538	peak_15538	chr15	42426476	42426651	5.85167	-	42426476	42426651	0	1	175	0	4	180	20	151	6.65787	3.88713	-1.98421	0.00538418	0.017317	ENSMUST00000022921	Angpt1	UTR3
19150	peak_19150	chrX	136983115	136983265	5.1431	-	136983115	136983265	0	1	150	0	3	131	11	78	6.49578	3.25985	-1.97923	0.0103153	0.028299	ENSMUST00000129807	Slc25a53	LastExon
16492	peak_16492	chr16	97950909	97951109	9.36829	-	97950909	97951109	0	1	200	0	30	454	64	336	4.6503	2.36897	-1.97199	0.000162166	0.00151309	ENSMUST00000063605	Zbtb21	LastExon
12708	peak_12708	chr11	69879839	69879889	4.96283	-	69879839	69879889	0	1	50	0	0	76	11	166	6.77609	3.27349	-1.96807	0.012184	0.0320656	ENSMUST00000050555	Kctd11	LastExon
6860	peak_6860	chr6	48024262	48024737	16.46	-	48024262	48024737	0	1	475	0	110	6432	190	4375	6.15185	4.05766	-1.96511	4.76494e-08	1.10929e-05	ENSMUST00000095944	Zfp777	UTR3
4633	peak_4633	chr4	117890170	117890445	15.3365	-	117890170	117890445	0	1	275	0	94	2031	138	1149	4.89195	2.79067	-1.96469	1.58926e-07	2.41683e-05	ENSMUST00000183773	Dph2	UTR3
2253	peak_2253	chr2	75976871	75977196	5.68349	-	75976871	75977196	0	1	325	0	4	251	16	188	7.20888	4.3963	-1.96178	0.00626968	0.0194581	ENSMUST00000099995	Ttc30a2	LastExon
3144	peak_3144	chr3	105717236	105717411	10.6268	+	105717236	105717411	0	1	175	0	30	332	90	343	4.54747	2.34623	-1.96073	3.95747e-05	0.000632423	ENSMUST00000098273	Inka2	UTR3
10890	peak_10890	chr10	53108481	53108531	16.9157	+	53108481	53108531	0	1	50	0	198	1126	252	469	3.71305	1.63852	-1.95884	2.91672e-08	8.08833e-06	ENSMUST00000105473	Slc35f1	UTR3
3143	peak_3143	chr3	105716736	105717011	12.1192	+	105716736	105717011	0	1	275	0	48	851	141	918	4.90255	2.75235	-1.95874	6.47901e-06	0.000224775	ENSMUST00000098273	Inka2	LastExon
7157	peak_7157	chr6	127768798	127769023	9.21868	-	127768798	127769023	0	1	225	0	51	870	93	536	4.0662	1.80164	-1.95484	0.000191363	0.00167841	ENSMUST00000032500	Prmt8	UTR5
16954	peak_16954	chr17	12967395	12967895	23.5789	-	12967395	12967895	0	1	500	0	618	11143	1233	7278	5.41689	3.3869	-1.95447	1.05419e-11	7.98088e-08	ENSMUST00000007007	Wtap	UTR3
19089	peak_19089	chrX	102144865	102145215	14.3907	-	102144865	102145215	0	1	350	0	109	1967	208	1159	5.41682	3.31623	-1.95288	4.44402e-07	4.65561e-05	ENSMUST00000056904	Ercc6l	LastExon
15010	peak_15010	chr14	56778263	56778313	5.55277	-	56778263	56778313	0	1	50	0	4	182	11	108	5.94839	3.07631	-1.95229	0.00706764	0.0213035	ENSMUST00000163924	Pspc1	UTR5
3601	peak_3601	chr3	108211871	108212096	6.33298	-	108211871	108212096	0	1	225	0	27	828	31	206	6.15145	3.50733	-1.95211	0.00339898	0.0124046	ENSMUST00000141387	Sypl2	UTR3
7539	peak_7539	chr7	62380278	62380603	9.7658	+	62380278	62380603	0	1	325	0	39	1215	72	786	5.61005	3.3806	-1.95096	0.00010331	0.00114869	ENSMUST00000080403	Magel2	LastExon
[truncated: 7,932 more rows]

## Sheet: 8054 Hypo-m6A peaks  
Symbol	Priority		Priority	Hypo-m6A peaks	Total
0610009B22Rik	UTR3		Exon	1336
0610030E20Rik	UTR5		Intergenic	3
0610037L13Rik	UTR3		Intron	3
[truncated: 8,051 more rows]

## Sheet: 4923 genes with Hypo-m6A peaks 
Symbol
[truncated: 4,923 more rows]
