# Supplementary material for: VIRMA-mediated m6A modification is essential for active ribosome biogenesis
Source: Research Square preprint supplement (doi:10.21203/rs.3.rs-3604242/v1), 2023-12-11
Supplement: Supplementary file 4 [file b35d6c93a658affbf4b45165.xlsx]

## Sheet: S5 Primers used for qRT-PCR
Species	Gene	Forward primer sequences (5'-3')	Reverse primer sequences (5'-3')
Mouse	VIRMA exon2	CAAAGTTCTCATATAGATGTGGTTC	CCATATGCTCTGTTGTCAGGTAAG
Mouse	METTL3	AACATCTGTGGCCCCTGAAC	TGGCGTAGAGATGGCAAGAC
Mouse	METTL14	GCTGAGAGTGCGGATAGCAT	CCTTCATCCAGACACTTCCGT
Mouse	WTAP	TGGCCCAACTGAGATCAACAA	AGGCGTAAACTTCCAGGCAC
Mouse	ZC3H13	CAAAGCACCCGAAAGAACCG	AGAGCTCAGAACCAGCCAAC
Mouse	CBLL1	GTTCTGGATCCTTGGGTGGTC	ATCCTTCTTCATCACCTTGCGG
Mouse	RRP15	TGCAGAGTGAAGCCAGATGT	AGCCTCCTGCTTCCTTAACC
Mouse	RPP38	CCTGCCATCATCACCTCACA	TGAAACCCAAGGCTAGCACA
Mouse	POP7	AAAACAGAGAACCCCGCTGT	CGAGCTAGCTGGGCCTTAAA
Mouse	NCL	AGGTAGAGGAGGCTTCCGAG	ATTGAACAGGTAACAGAGTA
Mouse	SHQ1	AAGTCAGTCAAGGACAGCCA	TCTCCTCTGCATCCTCTACA
Mouse	ABT1	TCCCACTGAGCAGGAGTTTA	CTACGGTTTTTCCTTGCTCT
Mouse	UTP15	CACAGCTTTGACTACGCAGC	TTGCTTCAGACTTCCGGTGT
Mouse	UTP23	AGGAGGAAAAAGAAGAAGGT	AAGACACTTTCAGGGTGGAT
Mouse	BYSL	TATAAGGCTGACCTGGCCAC	TCATTCCATGGTGACACCAC
Mouse	UTP14A	GTGCGGGTCCTTCCATATCC	TTGGTAACGACCTTGGGAGC
Mouse	FBLL1	GCCTGGTCTATGCGGTTGAA	ATCACGTCCACCATGCCAAT
Mouse	DIEXF	ATGAATGAGGAAGCTGGCAG	AGGATTTCTGTGATACACCA
Mouse	RPL30	GCTAAAACTGGGGTCCATCA	TTACTTCTCACCAGTCTGTT
Mouse	ACTIN	ATCAAGATCATTGCTCCTCC	CTAGAAGCACTTGCGGTGCA
Mouse	GAPDH	AACGACCCCTTCATTGAC	TCCACGACATACTCAGCAC
Mouse	NPM1	AGCAGGGGCAAAAGATGAGT	TTCAAAGCCCCCTAGGGAAAC
Mouse	RPS7	CTGGTGTGTACAAGAAGCTC	TACTGCTGTCGTGCACCCAT
Mouse	RPS20	AGAGGCGCCAAGGAAAAGAA	GGTCTTGGAACCTTCACCACA
Mouse	RPL11	TGCCTCAATATCTGCGTCGG	TTCTCCGGATGCCAAAGGAC
Mouse	RPL17	ATTAACCCATACATGAGCTC	TTATTCCCGGGCCATGAGTT
Mouse	FBL	TGAAGATGCTCGACACCCAC	AAAGTGTCCTCCATTCCGCA
Mouse	5'-ETS-1	ACTGACACGCTGTCCTTTCC	AAAGCAGGAAGCGTGGCTCG
Mouse	5'-ETS-2	TTTGGTCGTGTCTCGCTTGA	AGGAGACAAACCTGGAACGC
Mouse	Prec-18S	CTCCTCCTCCTCTCTCGC	ATGCATGGCTTAATCTTTGAGAC
Mouse	18S	CCCCTCGATGCTCTTAGCTG	GAACCGCGGTCCTATTCCAT
Mouse	18S-Prec	GCTGAGAAGACGGTCGAACT	CTCCTCCACAGTCTCCCGTT
Mouse	5.8S	CGTCGATGAAGAACGCAGCTA	GACGCTCAGACAGGCGTA
Mouse	Prec-28S	CCTTTCTGACCGCGACCTCA	GCCGTTACTGAGGGAATCCT
Mouse	28S	TCGTCCGACCTGGGTATAGG	CGGCCCCAAGACCTCTAATC
Human	VIRMA	CGAGCGCTGAGCAAAGTTC	GGGAGATGTCTCTCCATATGCTC
Human	RRP15	GGCCACAGACACTTCTGATAG	GTCCCAACACTTGATTCTCCATC
Human	RPP38	CAGGAAGCAGCTTGCCATTG	GGCAGGGACACTTCTGCTTA
Human	POP7	TCTACATTCACGGCTTGGGC	CTGGCTCCAGCTCATCAACA
Human	NCL	AAGAAGGTGGTCGTTTCCCC	TGGTAACTGCTTTGGCTGGT
Human	SHQ1	GTCTCCCTTACAAAGGCCCA	ATCACTTGCCTCAGAGCTGG
Human	RPL30	TCCTGGGGTACAAGCAGACT	TGCCACTGTAGTGATGGACA
Human	GAPDH	GTCAACGGATTTGGTCTGTATT	AGTCTTCTGGGTGGCAGTGAT
