# Supplementary material for: VIRMA-mediated m6A modification is essential for active ribosome biogenesis
Source: Research Square preprint supplement (doi:10.21203/rs.3.rs-3604242/v1), 2023-12-11
Supplement: Supplementary file 5 [file bc4be8bf6a4561a762de1fc5.xlsx]

## Sheet: RNA-seq identified 23146 genes
Row.names	baseMean	log2FoldChange	FoldChange	lfcSE	stat	pvalue	padj	WT-Input1	WT-Input2	WT-Input4	WT-Input5	KO-Input1	KO-Input3	KO-Input4	KO-Input5
0610005C13Rik	3.62599	-0.67418	0.626688	0.973841	-0.69229	0.488755	NA	4.02416	6.80057	5.17783	1.82498	0	7.19455	0.881868	3.10401
0610009B22Rik	39.217	0.262505	1.19956	0.295901	0.88714	0.375004	0.620384	29.1751	38.8604	43.4937	31.0246	33.9779	57.5564	29.9835	49.6642
0610009E02Rik	12.1149	0.283636	1.21726	0.508645	0.55763	0.577097	0.773769	10.0604	9.71509	18.6402	5.47493	10.9606	19.5281	13.228	9.31204
0610009L18Rik	19.1309	-0.227876	0.853891	0.460818	-0.494503	0.620951	0.803226	24.1449	15.5441	30.0314	12.7748	28.4976	21.5836	13.228	7.2427
0610010F05Rik	874.855	-0.335939	0.792268	0.105888	-3.17261	0.00151077	0.015897	958.755	962.766	1097.7	887.851	708.055	814.012	895.096	674.605
0610010K14Rik	12.9971	0.0923541	1.06611	0.604442	0.152792	0.878562	0.947389	25.151	7.77207	10.3557	7.29991	2.19212	17.4725	20.283	13.4507
0610012G03Rik	132.75	0.0741526	1.05274	0.169227	0.438183	0.661253	0.828225	124.749	166.128	119.09	107.674	120.567	142.863	140.217	140.715
0610030E20Rik	353.506	-0.117368	0.921868	0.103742	-1.13135	0.257908	0.505001	396.379	363.344	337.594	373.208	372.66	327.866	316.591	340.407
0610037L13Rik	273.861	0.143416	1.10452	0.126978	1.12946	0.258703	0.506058	271.631	306.997	216.433	245.459	286.072	297.032	267.206	300.055
0610038B21Rik	7.76645	0.790115	1.72921	0.732368	1.07885	0.280655	NA	4.02416	13.6011	5.17783	0	9.86454	7.19455	8.81868	13.4507
0610040B10Rik	14.8431	0.112818	1.08134	0.438157	0.257483	0.796806	0.904191	12.0725	16.5157	18.6402	10.0374	10.9606	11.3057	18.5192	20.6934
0610040J01Rik	14.8794	0.284396	1.2179	0.416642	0.682592	0.494864	0.716437	12.0725	12.6296	12.4268	16.4248	21.9212	14.3891	16.7555	12.416
0610043K17Rik	4.3637	0.570138	1.48467	0.923365	0.617457	0.536933	NA	7.04227	3.88604	3.1067	0	6.57636	5.13896	0.881868	8.27737
1010001B22Rik	2.18103	0.3729	1.29495	1.3077	0.285157	0.775524	NA	3.01812	0	0	4.56244	0	3.08338	2.6456	4.13868
1110002E22Rik	3.859	-0.0610698	0.958553	0.987519	-0.0618416	0.950689	NA	8.04831	6.80057	0	0.912488	6.57636	2.05559	4.40934	2.06934
1110002J07Rik	20.2359	-0.342281	0.788793	0.372753	-0.918252	0.358487	0.605259	26.157	18.4587	22.7824	22.8122	21.9212	21.5836	10.5824	17.5894
1110002L01Rik	216.633	-0.221464	0.857695	0.137627	-1.60916	0.107582	0.299902	251.51	219.561	206.077	254.584	227.981	187.058	171.082	215.212
1110003F10Rik	10.2519	-0.038552	0.973632	0.549274	-0.0701871	0.944045	0.97475	9.05435	12.6296	4.14226	15.5123	15.3448	6.16676	8.81868	10.3467
1110004F10Rik	1118.52	-0.196769	0.872502	0.0865785	-2.27273	0.0230426	0.109233	1075.46	1330	1230.25	1144.26	991.934	1012.38	1132.32	1031.57
1110006O24Rik	8.41139	-0.162821	0.893277	0.568941	-0.286183	0.774738	NA	8.04831	9.71509	10.3557	7.29991	8.76848	12.3335	3.52747	7.2427
1110008L16Rik	100.62	-0.0664202	0.955005	0.186435	-0.356265	0.721642	0.864279	127.767	96.1794	102.521	85.7739	106.318	91.4736	111.115	83.8083
1110008P14Rik	43.3892	0.174148	1.1283	0.302315	0.576049	0.564582	0.764423	25.151	50.5185	44.5293	42.887	59.1872	28.7782	54.6758	41.3868
1110012L19Rik	68.1802	0.684768	1.60744	0.235825	2.90372	0.00368762	0.0299001	59.3563	45.6609	61.0983	42.887	108.51	80.1678	60.8489	86.9123
1110013H19Rik	2.09634	-1.73997	0.299377	1.28854	-1.35034	0.176907	NA	2.01208	1.94302	7.24896	1.82498	1.09606	0	2.6456	0
1110015O18Rik	76.3122	0.513537	1.42755	0.198518	2.58685	0.00968568	0.0600184	59.3563	70.9202	56.9561	63.8742	87.6848	107.918	75.8406	87.947
1110017D15Rik	13.6171	0.11177	1.08055	0.465753	0.239977	0.810348	0.910532	19.1147	6.80057	15.5335	10.9499	15.3448	18.5003	12.3462	10.3467
1110018N20Rik	1.93711	2.0562	4.1589	1.56495	1.3139	0.188878	NA	3.01812	0	0	0	6.57636	0	1.76374	4.13868
1110019D14Rik	22.0229	-0.0203237	0.986011	0.35027	-0.0580228	0.953731	0.979791	24.1449	19.4302	17.6046	27.3747	19.7291	19.5281	19.4011	28.9708
1110020A21Rik	5.09247	-0.644993	0.639496	0.864608	-0.745995	0.45567	NA	4.02416	12.6296	8.28452	0	3.28818	3.08338	5.29121	4.13868
1110025M09Rik	11.5097	-0.0192259	0.986762	0.484253	-0.0397022	0.968331	0.985876	12.0725	6.80057	15.5335	11.8623	15.3448	12.3335	8.81868	9.31204
1110028F11Rik	2.11763	0.254531	1.19295	1.12637	0.225974	0.821221	NA	1.00604	1.94302	1.03557	3.64995	5.4803	1.02779	1.76374	1.03467
1110032A03Rik	84.9779	-0.105209	0.929671	0.19248	-0.546596	0.584657	0.778492	96.5798	71.8917	93.2009	91.2488	69.0518	84.279	97.0055	76.5656
1110032F04Rik	26.6639	-0.414235	0.750418	0.337807	-1.22625	0.220106	0.458327	21.1268	31.0883	41.4226	28.2871	19.7291	30.8338	21.1648	19.6587
1110035H17Rik	1.45303	-1.60974	0.327658	1.59298	-1.01052	0.312245	NA	6.03624	0.971509	0	1.82498	0	1.02779	1.76374	0
1110038B12Rik	630.041	0.258144	1.19594	0.113972	2.26498	0.023514	0.110597	596.581	448.837	668.975	581.255	660.924	711.233	659.637	712.888
1110038F14Rik	243.814	0.328705	1.25589	0.112289	2.92731	0.00341909	0.0283331	206.238	222.476	210.22	225.385	281.687	280.587	272.497	251.425
1110046J04Rik	6.5996	0.30348	1.23412	0.722827	0.419851	0.674594	NA	11.0664	3.88604	4.14226	4.56244	5.4803	15.4169	6.17308	2.06934
1110051M20Rik	442.951	-0.135678	0.910242	0.0995478	-1.36294	0.172901	0.396773	474.851	472.154	498.107	410.62	401.158	461.479	414.478	410.764
1110059E24Rik	156.81	-0.0970176	0.934964	0.146471	-0.662368	0.507735	0.726209	163.984	193.33	137.73	153.298	149.064	148.002	156.972	152.097
1110059G10Rik	78.6257	0.194484	1.14432	0.197594	0.984263	0.324986	0.573514	73.4409	79.6638	74.5607	65.6992	92.0691	63.7231	84.6593	95.1897
1110065P20Rik	63.309	-0.0603013	0.959064	0.238474	-0.252863	0.800374	0.905661	56.3382	79.6638	59.0272	63.8742	64.6675	53.4452	82.8956	46.5602
1190001M18Rik	5.2029	-0.207288	0.866164	0.880015	-0.23555	0.813782	NA	8.04831	5.82906	1.03557	7.29991	12.0567	1.02779	5.29121	1.03467
1190002N15Rik	299.987	-0.115043	0.923355	0.119556	-0.96225	0.335924	0.584075	325.957	259.393	321.025	341.271	304.705	259.004	293.662	294.881
1190005I06Rik	1.39557	1.46867	2.76766	1.42066	1.03379	0.301233	NA	1.00604	0	1.03557	0.912488	4.38424	1.02779	1.76374	1.03467
1190007I07Rik	39.7769	-0.429665	0.742434	0.317339	-1.35396	0.175748	0.400403	47.2838	70.9202	26.9247	37.412	28.4976	38.0283	30.8654	38.2828
1300002E11Rik	104.065	-0.661277	0.632318	0.215714	-3.06553	0.00217285	0.0204632	145.876	85.4928	139.801	138.698	66.8597	86.3346	67.022	102.432
1300014J16Rik	14.0803	0.949612	1.93135	0.444725	2.13528	0.0327381	0.139784	11.0664	11.6581	10.3557	5.47493	20.8251	19.5281	20.283	13.4507
1300017J02Rik	9.78132	-0.226451	0.854735	0.508972	-0.444917	0.65638	0.825384	14.0845	9.71509	9.32009	9.12488	6.57636	12.3335	8.81868	8.27737
1500002C15Rik	24.0318	0.0806752	1.05751	0.379201	0.21275	0.831522	0.922964	22.1329	24.2877	17.6046	29.1996	27.4015	12.3335	22.0467	37.2481
1500002F19Rik	2.00712	-0.958027	0.51476	1.37612	-0.69618	0.486316	NA	2.01208	4.85755	2.07113	1.82498	0	0	5.29121	0
1500004A13Rik	554.156	-0.742391	0.597748	0.0916015	-8.10457	5.29308e-16	2.28783e-13	684.107	680.057	755.963	655.167	398.966	454.284	413.596	391.106
1500005C15Rik	6.9904	0.231973	1.17444	0.736684	0.314888	0.752847	NA	7.04227	0.971509	12.4268	5.47493	4.38424	3.08338	13.228	9.31204
1500009C09Rik	52.9793	0.132128	1.09591	0.322547	0.409641	0.68207	0.841745	56.3382	19.4302	73.5251	52.9243	67.9557	56.5286	48.5027	48.6295
1500009L16Rik	92.2041	0.243502	1.18386	0.206342	1.18009	0.237966	0.481849	91.5496	80.6353	84.9163	80.299	135.911	72.9733	89.9505	101.398
1500011B03Rik	239.025	-0.21594	0.860985	0.117708	-1.83454	0.0665732	0.222796	253.522	275.909	263.034	235.422	217.02	240.503	223.994	202.795
1500015A07Rik	60.3617	-0.185424	0.879391	0.220999	-0.839027	0.401454	0.642426	55.3322	58.2906	70.4184	72.9991	59.1872	44.1951	63.4945	58.9762
1500015O10Rik	6.84962	0.135055	1.09813	0.930732	0.145107	0.884627	NA	8.04831	0	15.5335	2.73747	6.57636	4.11117	16.7555	1.03467
1500026H17Rik	5.43206	0.0844631	1.06029	0.875984	0.0964208	0.923186	NA	5.0302	2.91453	12.4268	0.912488	6.57636	1.02779	11.4643	3.10401
1500035N22Rik	5.0952	0.693058	1.61671	0.759608	0.912389	0.361564	NA	6.03624	1.94302	2.07113	5.47493	5.4803	3.08338	5.29121	11.3814
1600002K03Rik	32.5096	-0.238331	0.847725	0.302432	-0.788049	0.430668	0.666095	47.2838	28.1738	34.1736	31.0246	31.7857	25.6948	24.6923	37.2481
1600012H06Rik	120.61	0.480192	1.39493	0.170918	2.80949	0.00496195	0.0372412	92.5556	105.895	82.8452	121.361	132.623	124.363	155.209	150.027
1600014C10Rik	67.4514	0.160105	1.11737	0.207661	0.770991	0.440712	0.674146	64.3865	68.0057	66.2762	56.5743	56.9951	84.279	75.8406	67.2536
1600020E01Rik	167.971	-0.287273	0.81945	0.16813	-1.70864	0.0875175	0.263374	190.141	158.356	154.299	235.422	128.239	158.28	147.272	171.755
1600023N17Rik	9.93641	-0.172562	0.887266	0.592289	-0.291347	0.770786	0.890429	8.04831	7.77207	22.7824	3.64995	9.86454	10.2779	8.81868	8.27737
1600029O15Rik	63.3351	-0.181963	0.881503	0.236246	-0.770227	0.441165	0.674533	73.4409	75.7777	68.3473	52.0118	51.5148	45.2229	61.7308	78.635
1700001D01Rik	4.05145	0.316744	1.24552	0.804123	0.3939	0.693655	NA	2.01208	3.88604	2.07113	6.38742	6.57636	3.08338	5.29121	3.10401
1700001G11Rik	11.1477	0.88516	1.84697	0.547531	1.61664	0.105956	0.297148	5.0302	11.6581	7.24896	7.29991	12.0567	26.7226	8.81868	10.3467
1700001G17Rik	14.7775	-0.413442	0.75083	0.525673	-0.786501	0.431574	0.66664	20.1208	11.6581	15.5335	20.0747	25.2094	3.08338	13.228	9.31204
1700001J03Rik	2.42728	-0.288949	0.818498	1.20389	-0.240013	0.810321	NA	3.01812	6.80057	0	0.912488	0	2.05559	3.52747	3.10401
1700001J11Rik	4.02165	-0.919295	0.528767	0.948014	-0.969707	0.332193	NA	12.0725	2.91453	5.17783	0.912488	1.09606	6.16676	1.76374	2.06934
1700001L05Rik	9.49364	0.102018	1.07327	0.593826	0.171797	0.863597	0.939203	5.0302	8.74358	8.28452	14.5998	12.0567	3.08338	15.8736	8.27737
1700001L19Rik	1.53655	0.523803	1.43774	1.88862	0.277346	0.781514	NA	0	1.94302	3.1067	0	0	0	0	7.2427
1700001O22Rik	15.0232	0.0121317	1.00844	0.407301	0.0297857	0.976238	0.98961	14.0845	12.6296	17.6046	15.5123	17.537	16.4447	14.9918	11.3814
1700001P01Rik	6.98663	0.241938	1.18258	0.724971	0.333722	0.73859	NA	10.0604	4.85755	4.14226	6.38742	12.0567	12.3335	0.881868	5.17335
1700003E16Rik	14.6206	0.89346	1.85763	0.475796	1.87782	0.0604058	0.209003	8.04831	5.82906	13.4623	13.6873	16.4409	10.2779	26.456	22.7628
1700003F12Rik	7.98996	-0.0935336	0.937224	0.745868	-0.125402	0.900205	NA	4.02416	15.5441	4.14226	9.12488	5.4803	16.4447	0.881868	8.27737
1700003G18Rik	1.91786	-1.1097	0.463391	1.55168	-0.715157	0.474512	NA	5.0302	0	0	5.47493	2.19212	0	2.6456	0
1700003M07Rik	2.64936	0.180883	1.13358	1.06944	0.169138	0.865688	NA	2.01208	3.88604	3.1067	0.912488	6.57636	2.05559	2.6456	0
1700006J14Rik	5.15544	1.20485	2.30513	0.828531	1.4542	0.145892	NA	5.0302	0.971509	1.03557	5.47493	3.28818	7.19455	14.1099	4.13868
1700007K13Rik	3.99825	0.483682	1.39831	0.917821	0.52699	0.598201	NA	3.01812	0	2.07113	8.2124	2.19212	4.11117	6.17308	6.20802
1700007L15Rik	10.502	-0.0758227	0.948801	0.492641	-0.153911	0.87768	0.946883	8.04831	11.6581	13.4623	10.0374	7.67242	8.22234	11.4643	13.4507
1700008J07Rik	57.5591	-0.639913	0.641752	0.248741	-2.57261	0.0100936	0.06176	66.3986	53.433	75.5963	84.8614	50.4188	30.8338	44.0934	54.8376
1700008O03Rik	5.56654	0.228037	1.17124	0.656707	0.347243	0.728409	NA	4.02416	3.88604	6.21339	6.38742	5.4803	7.19455	6.17308	5.17335
1700010H22Rik	8.26747	-0.31584	0.803383	0.640473	-0.493136	0.621917	NA	7.04227	6.80057	6.21339	16.4248	13.1527	2.05559	6.17308	8.27737
1700010I14Rik	17.4606	-0.0547691	0.962749	0.441925	-0.123933	0.901368	0.956402	17.1027	26.2308	10.3557	17.3373	25.2094	8.22234	17.6374	17.5894
1700011L22Rik	1.35308	3.91312	15.0649	1.67944	2.33002	0.0198052	NA	0	0	0	0	1.09606	1.02779	3.52747	5.17335
1700012B09Rik	8.82806	0.80337	1.74517	0.719664	1.11631	0.264289	NA	4.02416	0	14.4979	7.29991	7.67242	7.19455	12.3462	17.5894
1700012C14Rik	2.89703	-0.0867956	0.941612	0.998688	-0.0869096	0.930743	NA	4.02416	1.94302	4.14226	1.82498	1.09606	7.19455	0.881868	2.06934
1700012D14Rik	93.4203	-0.372145	0.772633	0.208954	-1.78099	0.0749145	0.239037	90.5435	94.2364	112.877	123.186	84.3966	83.2512	56.4395	102.432
1700012D16Rik	19.5971	0.395336	1.31525	0.396307	0.99755	0.318498	0.567516	11.0664	18.4587	12.4268	25.5497	26.3054	23.6392	23.8104	15.5201
1700013F07Rik	6.47472	1.86766	3.64941	0.916377	2.03809	0.0415404	NA	1.00604	0	9.32009	0.912488	15.3448	6.16676	3.52747	15.5201
1700014D04Rik	2.97263	-0.648518	0.637935	1.1125	-0.582938	0.559935	NA	1.00604	8.74358	1.03557	3.64995	1.09606	4.11117	0	4.13868
1700015C15Rik	1.33428	1.52967	2.88721	2.20079	0.695056	0.48702	NA	0	0	0	2.73747	0	0	7.93681	0
1700015C17Rik	8.78374	-0.422365	0.7462	0.585673	-0.721162	0.47081	NA	4.02416	6.80057	17.6046	11.8623	6.57636	8.22234	7.93681	7.2427
1700016A09Rik	3.68576	3.18404	9.08849	1.13877	2.79605	0.00517321	NA	0	0	1.03557	1.82498	12.0567	5.13896	5.29121	4.13868
1700016J18Rik	1.86838	-1.98267	0.25302	1.55232	-1.27723	0.201521	NA	0	0	8.28452	3.64995	1.09606	0	0.881868	1.03467
1700016K19Rik	11.9533	0.377443	1.29904	0.575415	0.65595	0.511856	0.729301	7.04227	4.85755	21.7469	8.2124	7.67242	8.22234	20.283	17.5894
1700016P03Rik	4.8335	-0.590448	0.664137	0.800237	-0.737842	0.460611	NA	2.01208	7.77207	4.14226	9.12488	7.67242	4.11117	1.76374	2.06934
1700017B05Rik	232.129	0.732518	1.66154	0.142787	5.13013	2.89538e-07	1.77481e-05	161.972	194.302	146.015	194.36	316.761	326.838	253.978	262.806
1700018A04Rik	11.2886	0.208813	1.15574	0.557945	0.374254	0.708215	0.856289	13.0785	11.6581	8.28452	9.12488	7.67242	4.11117	22.9286	13.4507
1700018L02Rik	5.2108	0.574417	1.48908	0.74257	0.773553	0.439195	NA	3.01812	6.80057	5.17783	1.82498	2.19212	8.22234	6.17308	8.27737
1700019A02Rik	15.0116	0.114667	1.08273	0.47549	0.241155	0.809435	0.909946	22.1329	13.6011	7.24896	14.5998	21.9212	17.4725	15.8736	7.2427
1700020D05Rik	33.5442	-0.457792	0.7281	0.332024	-1.37879	0.16796	0.390399	32.1933	28.1738	64.205	31.0246	29.5936	24.667	32.6291	25.8668
1700020I14Rik	2201.55	-0.274657	0.826647	0.0601028	-4.56979	4.88208e-06	0.000183699	2493.97	2316.08	2405.62	2426.31	2055.11	2013.45	2011.54	1890.34
1700021F05Rik	216.544	0.278707	1.21311	0.129625	2.15011	0.0315467	0.136415	182.093	191.387	225.753	183.41	243.325	262.087	212.53	231.766
1700022N22Rik	3.60549	-1.42556	0.372276	0.994067	-1.43406	0.151554	NA	1.00604	8.74358	3.1067	8.2124	2.19212	2.05559	3.52747	0
1700023F06Rik	2.52903	-0.575629	0.670994	1.29657	-0.443962	0.65707	NA	1.00604	0.971509	0	10.0374	4.38424	0	1.76374	2.06934
1700023G09Rik	1.36243	0.867415	1.82439	1.55174	0.558995	0.576165	NA	2.01208	0	0	1.82498	0	4.11117	0.881868	2.06934
1700023H06Rik	1.93662	1.55344	2.93516	1.37179	1.13242	0.257459	NA	2.01208	0.971509	0	0.912488	6.57636	0	0.881868	4.13868
1700025G04Rik	899.738	-0.17101	0.888221	0.0747612	-2.28742	0.0221714	0.106601	959.761	992.883	943.4	915.226	845.062	900.346	792.799	848.43
1700026J14Rik	2.64913	1.09556	2.13697	1.22501	0.894332	0.371145	NA	0	2.91453	1.03557	2.73747	1.09606	6.16676	0	7.2427
1700026N04Rik	3.89604	-0.453436	0.730302	1.25717	-0.360679	0.718339	NA	8.04831	0	0	10.0374	0	4.11117	7.93681	1.03467
1700028E10Rik	29.2002	-0.0470266	0.967929	0.331495	-0.141862	0.887189	0.95039	29.1751	37.8889	24.8536	26.4622	43.8424	26.7226	22.9286	21.7281
1700028J19Rik	3.2135	-0.180298	0.882521	0.918112	-0.196379	0.844314	NA	6.03624	0.971509	2.07113	4.56244	2.19212	2.05559	2.6456	5.17335
1700028K03Rik	3.69007	-0.483526	0.715227	1.01732	-0.475292	0.634579	NA	4.02416	3.88604	9.32009	0	1.09606	5.13896	0.881868	5.17335
1700028N14Rik	9.80295	-0.0477414	0.96745	0.580528	-0.082238	0.934457	0.970617	10.0604	13.6011	6.21339	10.0374	14.2488	6.16676	14.9918	3.10401
1700028P14Rik	3.0409	1.64783	3.13362	1.04713	1.57366	0.115566	NA	0	1.94302	3.1067	0.912488	2.19212	6.16676	7.93681	2.06934
1700029H14Rik	1.95502	-0.566593	0.67521	1.62557	-0.348551	0.727427	NA	0	0	1.03557	8.2124	3.28818	0	0	3.10401
1700029I15Rik	24.0775	-0.356496	0.781059	0.339312	-1.05064	0.293423	0.543498	29.1751	22.3447	24.8536	31.9371	19.7291	23.6392	26.456	14.4854
1700029J07Rik	49.2529	0.0728936	1.05182	0.296959	0.245467	0.806095	0.908595	44.2657	26.2308	53.8494	67.5241	53.7069	62.6954	48.5027	37.2481
1700030C10Rik	5.75009	0.414291	1.33264	0.69966	0.592131	0.553763	NA	4.02416	3.88604	7.24896	4.56244	10.9606	2.05559	7.05494	6.20802
1700030C12Rik	5.85065	-0.69697	0.616866	0.819536	-0.850444	0.395078	NA	8.04831	9.71509	2.07113	9.12488	1.09606	11.3057	4.40934	1.03467
1700030I03Rik	2.22037	-3.78597	0.0724954	1.6147	-2.34469	0.0190431	NA	12.0725	0	2.07113	2.73747	0	0	0.881868	0
1700030J22Rik	52.946	0.395027	1.31497	0.245187	1.61112	0.107153	0.299442	48.2899	43.7179	38.3159	52.9243	43.8424	62.6954	75.8406	57.9416
1700030K09Rik	182.64	0.102616	1.07372	0.145102	0.707196	0.479445	0.704224	189.135	152.527	184.331	178.848	215.924	161.363	207.239	171.755
1700030L22Rik	2.84678	-0.883861	0.541915	1.08429	-0.815154	0.414984	NA	6.03624	6.80057	1.03557	0.912488	3.28818	2.05559	2.6456	0
1700034H15Rik	16.9855	-0.258461	0.835979	0.414791	-0.623112	0.533211	0.742838	16.0966	25.2592	20.7113	11.8623	21.9212	14.3891	13.228	12.416
1700034P13Rik	2.94423	-0.163602	0.892793	1.0517	-0.15556	0.87638	NA	1.00604	6.80057	0	4.56244	2.19212	2.05559	1.76374	5.17335
1700037C18Rik	30.6185	0.137448	1.09996	0.309262	0.44444	0.656724	0.825534	24.1449	34.0028	34.1736	24.6372	25.2094	25.6948	38.8022	38.2828
1700037H04Rik	204.131	-0.0532197	0.963783	0.121788	-0.436987	0.66212	0.828621	219.317	197.216	201.935	213.522	201.675	189.114	217.821	192.449
1700039M10Rik	2.8292	1.19814	2.29444	1.078	1.11145	0.266377	NA	5.0302	0.971509	0	0.912488	2.19212	6.16676	5.29121	2.06934
1700040D17Rik	11.707	0.385731	1.30652	0.665918	0.579248	0.562422	0.763407	7.04227	19.4302	11.3912	2.73747	6.57636	29.806	5.29121	11.3814
1700040L08Rik	1.50657	-0.437313	0.738509	1.30747	-0.334472	0.738023	NA	1.00604	0.971509	3.1067	1.82498	2.19212	0	0.881868	2.06934
1700041G16Rik	5.51589	-0.782374	0.581409	0.851076	-0.919276	0.357951	NA	2.01208	10.6866	4.14226	10.9499	9.86454	1.02779	4.40934	1.03467
1700047I17Rik2	5.72578	0.174679	1.12871	0.672238	0.259847	0.794981	NA	3.01812	5.82906	6.21339	6.38742	8.76848	7.19455	5.29121	3.10401
1700047K16Rik	2.02067	-0.311688	0.805698	1.26659	-0.246084	0.805617	NA	3.01812	0.971509	3.1067	1.82498	5.4803	0	1.76374	0
1700048O20Rik	31.2831	0.230931	1.17359	0.317305	0.727788	0.466743	0.694967	36.2174	19.4302	25.8891	33.7621	33.9779	24.667	43.2115	33.1095
1700052K11Rik	142.629	0.568424	1.4829	0.181417	3.13324	0.00172886	0.0175775	153.924	96.1794	113.912	95.8113	151.256	194.253	152.563	183.137
1700054O19Rik	2.83141	3.39478	10.518	1.3383	2.53663	0.0111925	NA	2.01208	0	0	0	5.4803	3.08338	7.93681	4.13868
1700055D18Rik	12.2306	-0.0986637	0.933898	0.600525	-0.164296	0.869498	0.942495	23.1389	5.82906	12.4268	9.12488	14.2488	22.6114	5.29121	5.17335
1700056E22Rik	3.86489	-0.640855	0.641333	0.839856	-0.763054	0.445431	NA	8.04831	4.85755	4.14226	1.82498	2.19212	5.13896	2.6456	2.06934
1700056N10Rik	63.2747	-0.204089	0.868087	0.248785	-0.820344	0.41202	0.650808	67.4046	64.1196	77.6674	62.0492	33.9779	69.8899	55.5577	75.531
1700063D05Rik	2.31388	-0.93118	0.524429	1.22697	-0.758926	0.447897	NA	4.02416	1.94302	5.17783	0.912488	4.38424	0	0	2.06934
1700065D16Rik	8.72502	1.04658	2.06563	0.750835	1.39389	0.16335	NA	3.01812	2.91453	12.4268	4.56244	2.19212	23.6392	15.8736	5.17335
1700066M21Rik	142.797	-0.108197	0.927747	0.15998	-0.676313	0.498842	0.719037	145.876	129.211	183.295	135.048	127.143	143.891	151.681	126.23
1700067K01Rik	22.0458	-0.118249	0.921305	0.460606	-0.256724	0.797392	0.904631	31.1872	14.5726	8.28452	37.412	24.1133	26.7226	12.3462	21.7281
1700081N11Rik	4.94963	-1.01213	0.495815	0.878166	-1.15254	0.249097	NA	0	13.6011	8.28452	4.56244	3.28818	4.11117	2.6456	3.10401
1700082M22Rik	3.39988	0.60524	1.52123	0.948732	0.637946	0.523509	NA	1.00604	3.88604	3.1067	2.73747	2.19212	9.25013	0.881868	4.13868
1700084C06Rik	6.99176	-0.365644	0.776123	0.71853	-0.508877	0.610838	NA	14.0845	0.971509	7.24896	9.12488	8.76848	8.22234	4.40934	3.10401
1700084E18Rik	4.90331	0.397123	1.31688	0.847668	0.468488	0.639436	NA	11.0664	2.91453	2.07113	0.912488	7.67242	2.05559	5.29121	7.2427
1700086D15Rik	21.4178	-0.0895903	0.93979	0.433206	-0.206807	0.83616	0.925425	31.1872	10.6866	28.9958	17.3373	33.9779	19.5281	14.1099	15.5201
1700086L19Rik	12.1014	0.120807	1.08734	0.499746	0.241736	0.808984	0.909622	8.04831	17.4872	14.4979	6.38742	10.9606	18.5003	10.5824	10.3467
1700086O06Rik	55.3203	-0.490015	0.712018	0.249965	-1.96033	0.049957	0.184111	61.3684	81.6068	50.7427	64.7867	43.8424	32.8894	49.3846	57.9416
1700086P04Rik	1.68696	0.739295	1.66936	1.46714	0.503902	0.61433	NA	0	0	4.14226	0.912488	3.28818	3.08338	0	2.06934
1700087I21Rik	3.08558	-0.199488	0.870859	1.1134	-0.17917	0.857804	NA	1.00604	3.88604	8.28452	0	5.4803	4.11117	0.881868	1.03467
1700088E04Rik	25.7391	0.588279	1.50345	0.34314	1.7144	0.0864556	0.261308	23.1389	22.3447	18.6402	18.2498	37.266	18.5003	38.8022	28.9708
1700092M07Rik	14.2221	0.0212162	1.01481	0.496399	0.0427403	0.965909	0.98522	22.1329	6.80057	8.28452	19.1623	17.537	17.4725	14.1099	8.27737
1700093K21Rik	3.81581	0.305162	1.23556	0.793983	0.384343	0.700724	NA	2.01208	3.88604	4.14226	3.64995	3.28818	3.08338	5.29121	5.17335
1700094M23Rik	9.40884	0.181858	1.13434	0.561245	0.324027	0.745918	NA	7.04227	13.6011	6.21339	8.2124	12.0567	9.25013	4.40934	14.4854
1700095J03Rik	5.16466	0.0360197	1.02528	0.908251	0.0396583	0.968366	NA	0	9.71509	4.14226	6.38742	9.86454	3.08338	0.881868	7.2427
1700096K18Rik	10.2647	-0.637926	0.642636	0.592081	-1.07743	0.281288	0.531399	13.0785	21.3732	10.3557	5.47493	3.28818	7.19455	14.1099	7.2427
1700101I11Rik	2.90127	-1.03291	0.488722	1.12394	-0.919011	0.35809	NA	5.0302	6.80057	2.07113	1.82498	2.19212	0	5.29121	0
1700102H20Rik	3.95762	-0.0479895	0.967283	0.985658	-0.0486878	0.961168	NA	1.00604	5.82906	1.03557	8.2124	4.38424	0	7.05494	4.13868
1700102P08Rik	20.2391	0.156339	1.11446	0.395617	0.395178	0.692712	0.847698	17.1027	19.4302	20.7113	19.1623	25.2094	32.8894	14.9918	12.416
1700105P06Rik	9.48579	-0.277396	0.825079	0.533717	-0.519744	0.603242	0.792707	14.0845	10.6866	11.3912	5.47493	6.57636	11.3057	7.05494	9.31204
1700108F19Rik	1.93094	-0.275622	0.826094	1.24804	-0.220844	0.825214	NA	0	0.971509	1.03557	6.38742	2.19212	1.02779	1.76374	2.06934
1700109H08Rik	178.25	-0.297705	0.813546	0.149877	-1.98633	0.046997	0.177193	182.093	207.903	225.753	170.635	189.618	140.808	162.264	146.923
1700110C19Rik	18.0908	1.06553	2.09295	0.422867	2.51979	0.0117425	0.0687544	16.0966	13.6011	4.14226	12.7748	23.0173	26.7226	19.4011	28.9708
1700112D23Rik	1.79941	-3.45783	0.09101	1.61827	-2.13675	0.0326187	NA	5.0302	1.94302	0	6.38742	0	0	0	1.03467
1700112J16Rik	2.46892	0.894377	1.85881	1.23676	0.723159	0.469582	NA	6.03624	0	0	0.912488	2.19212	1.02779	4.40934	5.17335
1700113A16Rik	17.2087	-0.116474	0.922439	0.416284	-0.279795	0.779634	0.89574	24.1449	13.6011	14.4979	19.1623	25.2094	16.4447	13.228	11.3814
1700120B22Rik	2.65542	-0.0591982	0.959797	1.16206	-0.0509424	0.959371	NA	6.03624	0.971509	1.03557	2.73747	2.19212	1.02779	0	7.2427
1700120C14Rik	7.26322	-0.330693	0.795154	0.691529	-0.478206	0.632504	NA	11.0664	7.77207	7.24896	6.38742	0	7.19455	7.05494	11.3814
1700120K04Rik	1.58237	-0.100756	0.932544	1.53343	-0.0657066	0.947611	NA	1.00604	0	0	5.47493	2.19212	0	0.881868	3.10401
1700121C08Rik	1.42605	1.46925	2.76879	1.59695	0.920035	0.357554	NA	0	0.971509	2.07113	0	2.19212	5.13896	0	1.03467
1700122E12Rik	6.42124	0.729468	1.65803	0.765101	0.953427	0.340374	NA	1.00604	2.91453	5.17783	10.0374	14.2488	4.11117	3.52747	10.3467
1700123M08Rik	20.8698	-0.352994	0.782957	0.485897	-0.726481	0.467544	0.695499	31.1872	27.2023	9.32009	25.5497	33.9779	20.5559	8.81868	10.3467
1700123O20Rik	165.976	0.0175037	1.01221	0.142863	0.12252	0.902487	0.95664	152.918	159.328	156.37	190.71	167.697	150.058	161.382	189.345
1700123O21Rik	10.4422	-1.56812	0.337247	0.758162	-2.06832	0.0386098	0.156013	5.0302	7.77207	42.4582	7.29991	1.09606	7.19455	4.40934	8.27737
1700124L16Rik	14.2998	0.567938	1.4824	0.454121	1.25063	0.211069	0.44673	11.0664	19.4302	8.28452	7.29991	19.7291	13.3613	17.6374	17.5894
1700129L04Rik	2.00842	-0.0215381	0.985182	1.55888	-0.0138164	0.988976	NA	5.0302	0	3.1067	0	0	6.16676	1.76374	0
1810009A15Rik	4.91045	-0.25703	0.836809	0.863787	-0.297562	0.766037	NA	0	9.71509	6.21339	5.47493	1.09606	6.16676	4.40934	6.20802
1810010D01Rik	2.79828	0.431394	1.34854	1.15198	0.374482	0.708046	NA	4.02416	0	0	5.47493	1.09606	2.05559	3.52747	6.20802
1810010H24Rik	9.68325	0.0538217	1.03801	0.619402	0.0868931	0.930756	0.968863	9.05435	16.5157	4.14226	8.2124	5.4803	7.19455	6.17308	20.6934
1810012K16Rik	3.51799	0.0297523	1.02084	0.867994	0.034277	0.972656	NA	6.03624	1.94302	4.14226	1.82498	3.28818	2.05559	2.6456	6.20802
1810013D15Rik	3.30811	0.282814	1.21657	0.992233	0.285028	0.775623	NA	5.0302	1.94302	3.1067	1.82498	2.19212	7.19455	0	5.17335
1810013L24Rik	1115.73	0.321051	1.24924	0.090122	3.5624	0.000367473	0.00557059	859.158	1066.72	1063.53	978.188	1280.2	1321.74	1132.32	1224.02
1810014B01Rik	46.7656	0.310196	1.23988	0.247909	1.25125	0.210843	0.446653	47.2838	48.5755	37.2803	33.7621	52.6109	51.3896	43.2115	60.0109
1810019N24Rik	10.9127	-1.291	0.408667	0.526142	-2.45372	0.0141389	0.0781183	10.0604	22.3447	17.6046	11.8623	6.57636	6.16676	4.40934	8.27737
1810020O05Rik	1.39699	-0.77016	0.586352	1.7621	-0.437069	0.662061	NA	5.0302	0.971509	1.03557	0	0	0	0	4.13868
1810021B22Rik	9.33866	-0.759872	0.590549	0.528448	-1.43793	0.150453	NA	15.0906	9.71509	11.3912	10.9499	5.4803	5.13896	9.70055	7.2427
1810022K09Rik	190.728	-0.0798826	0.946135	0.133614	-0.59786	0.549933	0.754835	169.015	215.675	207.113	192.535	192.907	174.725	201.066	172.79
1810024B03Rik	34.501	-0.882278	0.54251	0.308585	-2.8591	0.0042484	0.0332476	61.3684	37.8889	39.3515	40.1495	24.1133	32.8894	18.5192	21.7281
1810026B05Rik	961.472	-0.17378	0.886517	0.0830765	-2.09181	0.0364559	0.150143	1119.72	951.108	936.151	1069.44	945.9	906.513	884.514	878.435
1810030O07Rik	250.748	-0.0124025	0.99144	0.114965	-0.107881	0.91409	0.962329	237.425	244.82	250.607	273.747	242.229	257.976	230.168	269.014
1810032O08Rik	97.1686	0.248572	1.18803	0.185032	1.3434	0.179143	0.405408	77.465	83.5498	84.9163	108.586	108.51	114.085	86.4231	113.814
1810037I17Rik	79.7644	0.203612	1.15158	0.201027	1.01286	0.311128	0.561048	71.4288	87.4358	77.6674	60.2242	71.2439	99.6959	79.3681	91.051
1810041H14Rik	2.43051	3.97126	15.6844	1.37692	2.88417	0.00392442	NA	0	0	0	0.912488	2.19212	4.11117	7.05494	5.17335
1810043G02Rik	159.821	0.216753	1.16211	0.138286	1.56742	0.117016	0.315723	127.767	151.555	159.477	152.386	163.313	180.892	163.146	180.033
1810044D09Rik	4.23762	-0.198757	0.871301	0.865378	-0.229676	0.818344	NA	1.00604	6.80057	2.07113	8.2124	1.09606	6.16676	4.40934	4.13868
1810049J17Rik	1.40227	0.464062	1.37942	1.66891	0.278062	0.780965	NA	0	2.91453	0	1.82498	0	0	4.40934	2.06934
1810055G02Rik	259.842	0.372315	1.29443	0.131084	2.84028	0.00450741	0.0347423	228.371	259.393	186.402	230.86	298.128	298.06	255.742	321.783
1810058I24Rik	166.604	0.230606	1.17333	0.137972	1.6714	0.0946424	0.277314	170.021	143.783	162.584	136.873	187.426	188.086	164.027	180.033
1810059C17Rik	1.96411	-1.03597	0.487686	1.33716	-0.774755	0.438484	NA	1.00604	5.82906	0	3.64995	1.09606	1.02779	0	3.10401
1810059H22Rik	4.55319	0.16751	1.12312	1.00653	0.166422	0.867825	NA	5.0302	0	11.3912	0.912488	4.38424	2.05559	10.5824	2.06934
1810062O18Rik	12.1072	-0.0860853	0.942076	0.512032	-0.168125	0.866485	0.94113	19.1147	9.71509	10.3557	10.9499	10.9606	6.16676	20.283	9.31204
2010001A14Rik	10.901	-0.0936514	0.937148	0.636584	-0.147116	0.883041	0.949325	14.0845	9.71509	2.07113	19.1623	3.28818	8.22234	14.1099	16.5547
2010001K21Rik	7.46894	-0.248504	0.841769	0.761836	-0.326191	0.744279	NA	16.0966	1.94302	7.24896	7.29991	8.76848	1.02779	13.228	4.13868
2010007H06Rik	3.53377	-0.63435	0.644231	0.906156	-0.700045	0.483899	NA	4.02416	2.91453	1.03557	9.12488	2.19212	4.11117	1.76374	3.10401
2010015M23Rik	47.8411	0.0723003	1.05139	0.267074	0.270712	0.786612	0.89894	33.1993	47.604	43.4937	62.0492	59.1872	38.0283	54.6758	44.4908
2010109A12Rik	6.20558	-0.326007	0.797742	0.648551	-0.502669	0.615197	NA	4.02416	8.74358	10.3557	4.56244	5.4803	6.16676	6.17308	4.13868
2010110E17Rik	1.42209	-0.0688961	0.953367	1.44285	-0.0477502	0.961915	NA	1.00604	1.94302	2.07113	0.912488	0	0	4.40934	1.03467
2010110K18Rik	18.5522	0.291985	1.22432	0.394837	0.739507	0.459599	0.689031	11.0664	16.5157	13.4623	25.5497	19.7291	22.6114	22.9286	16.5547
2010111I01Rik	301.54	-0.0964502	0.935332	0.105303	-0.915934	0.359702	0.606048	315.896	299.225	306.527	323.933	320.05	293.949	273.379	279.361
2010204K13Rik	32.3343	-0.0820911	0.944687	0.334491	-0.245421	0.806131	0.908595	29.1751	45.6609	20.7113	37.412	28.4976	20.5559	35.2747	41.3868
2010300C02Rik	13.2336	0.327597	1.25492	0.501844	0.652787	0.513894	0.730611	21.1268	6.80057	8.28452	10.9499	12.0567	11.3057	22.9286	12.416
2010310C07Rik	5.53713	-0.809229	0.570687	0.677189	-1.19498	0.232093	NA	5.0302	9.71509	5.17783	8.2124	4.38424	4.11117	3.52747	4.13868
2010315B03Rik	82.6154	-0.0521737	0.964482	0.193004	-0.270325	0.78691	0.899136	81.4892	87.4358	75.5963	91.2488	83.3006	95.5847	63.4945	82.7737
2010320M18Rik	54.3525	0.00861631	1.00599	0.23145	0.0372275	0.970304	0.986872	63.3805	42.7464	57.9916	52.9243	53.7069	59.612	59.967	44.4908
2200002D01Rik	2.24228	1.00554	2.00769	1.09925	0.914748	0.360324	NA	2.01208	0	3.1067	0.912488	2.19212	3.08338	3.52747	3.10401
2210008F06Rik	18.9058	-0.00347665	0.997593	0.413119	-0.00841562	0.993285	0.996715	23.1389	17.4872	9.32009	25.5497	24.1133	21.5836	17.6374	12.416
2210016F16Rik	187.935	0.456534	1.37224	0.129519	3.52483	0.000423761	0.00619613	171.027	163.214	152.228	147.823	199.483	206.586	229.286	233.836
2210016L21Rik	311.969	-0.429232	0.742657	0.117242	-3.66109	0.000251148	0.00412717	344.065	353.629	360.377	375.033	247.71	287.782	301.599	225.558
2210406O10Rik	5.85204	-2.27073	0.207225	0.849054	-2.67442	0.00748578	NA	9.05435	2.91453	10.3557	16.4248	2.19212	4.11117	1.76374	0
2210408I21Rik	141.799	-0.39445	0.760779	0.167986	-2.34811	0.0188688	0.0955691	153.924	125.325	202.971	162.423	126.047	120.252	129.635	113.814
2210412B16Rik	11.666	0.30943	1.23922	0.486336	0.636248	0.524615	0.73648	10.0604	10.6866	15.5335	5.47493	15.3448	10.2779	11.4643	14.4854
2210418O10Rik	18.2068	0.150441	1.10991	0.414464	0.362977	0.716622	0.861	11.0664	20.4017	24.8536	12.7748	15.3448	27.7504	15.8736	17.5894
2300009A05Rik	58.7901	-0.030916	0.978799	0.260711	-0.118583	0.905605	0.957703	50.302	64.1196	82.8452	41.062	51.5148	48.3063	73.195	58.9762
2310001H17Rik	2.70944	1.17237	2.25381	1.11451	1.05191	0.292839	NA	2.01208	1.94302	0	2.73747	2.19212	2.05559	9.70055	1.03467
2310002F09Rik	3.92957	0.718157	1.64508	0.808892	0.887828	0.374633	NA	3.01812	1.94302	4.14226	2.73747	7.67242	5.13896	2.6456	4.13868
2310009A05Rik	71.444	0.333413	1.25999	0.199593	1.67046	0.0948278	0.277513	65.3926	61.2051	64.205	62.0492	89.8769	62.6954	80.25	85.8777
2310009B15Rik	74.6099	-0.459696	0.727139	0.237233	-1.93774	0.0526551	0.191142	87.5254	85.4928	67.3117	105.849	50.4188	56.5286	89.9505	53.8029
2310010J17Rik	15.7577	0.177219	1.1307	0.429046	0.413054	0.679567	0.839843	18.1087	7.77207	20.7113	12.7748	17.537	14.3891	20.283	14.4854
2310011J03Rik	119.007	-0.155137	0.898047	0.161888	-0.958296	0.337914	0.58603	133.803	135.04	102.521	129.573	121.663	116.141	100.533	112.779
2310014F06Rik	19.4634	0.403811	1.323	0.392619	1.02851	0.303712	0.553538	19.1147	17.4872	8.28452	21.8997	19.7291	26.7226	17.6374	24.8321
2310015A10Rik	60.1485	-0.253434	0.838897	0.251094	-1.00932	0.312822	0.562612	41.2476	80.6353	61.0983	78.474	54.803	45.2229	55.5577	64.1496
2310022A10Rik	282.226	0.247516	1.18716	0.120703	2.05061	0.0403046	0.160315	246.48	260.365	261.998	262.797	320.05	357.672	274.261	274.188
2310022B05Rik	747.214	-0.0847937	0.942919	0.0949223	-0.893296	0.371699	0.617301	700.203	787.894	856.412	733.641	651.06	704.038	783.981	760.483
2310026L22Rik	2.99283	0.533859	1.4478	1.21713	0.43862	0.660937	NA	5.0302	2.91453	0	1.82498	0	1.02779	1.76374	11.3814
2310030G06Rik	2.57191	0.45309	1.36897	1.05317	0.430216	0.667038	NA	1.00604	0	3.1067	4.56244	2.19212	4.11117	3.52747	2.06934
2310033P09Rik	307.656	0.136063	1.0989	0.117406	1.15891	0.246493	0.49115	316.902	314.769	243.358	297.471	306.897	349.45	327.173	305.228
2310034G01Rik	8.06291	0.600844	1.5166	0.591871	1.01516	0.310029	NA	4.02416	9.71509	7.24896	4.56244	10.9606	9.25013	5.29121	13.4507
2310039H08Rik	27.8678	-0.123738	0.917807	0.311694	-0.396984	0.691379	0.846805	35.2114	30.1168	30.0314	20.9872	25.2094	31.8616	24.6923	24.8321
2310040G24Rik	8.65485	-0.648095	0.638122	0.561217	-1.1548	0.248171	NA	6.03624	9.71509	16.569	10.0374	6.57636	7.19455	7.93681	5.17335
2310043P16Rik	11.3044	-0.469097	0.722417	0.521605	-0.899334	0.368475	0.614076	20.1208	8.74358	13.4623	10.0374	10.9606	9.25013	4.40934	13.4507
2310047D07Rik	1.47997	-2.25061	0.210135	1.93882	-1.16082	0.245716	NA	2.01208	7.77207	0	0	0	2.05559	0	0
2310057M21Rik	301.159	0.506866	1.42096	0.119627	4.23706	2.26462e-05	0.000641592	278.673	241.906	225.753	248.197	385.813	386.45	322.764	319.713
2310058D17Rik	74.2702	0.0507427	1.0358	0.202806	0.250203	0.80243	0.906797	83.5013	73.8347	68.3473	66.6117	64.6675	88.3902	84.6593	64.1496
2310061I04Rik	123.218	0.172604	1.12709	0.181128	0.95294	0.340621	0.588907	93.5617	136.011	97.3431	135.961	121.663	155.197	120.816	125.195
2310068J16Rik	5.0786	0.731418	1.66027	0.792677	0.922719	0.356154	NA	3.01812	1.94302	2.07113	8.2124	3.28818	3.08338	9.70055	9.31204
2410002F23Rik	595.797	-0.0324681	0.977746	0.102133	-0.317899	0.750562	0.880399	496.983	612.051	622.375	677.979	596.257	604.342	587.324	569.069
2410004B18Rik	220.81	0.0859037	1.06135	0.13177	0.651921	0.514452	0.730776	257.546	192.359	208.149	198.922	222.5	243.587	211.648	231.766
2410004I01Rik	3.60123	-1.61959	0.325428	0.963316	-1.68127	0.0927113	NA	4.02416	2.91453	9.32009	5.47493	0	2.05559	0.881868	4.13868
2410004P03Rik	9.86287	0.379292	1.3007	0.589418	0.643503	0.519898	0.733812	8.04831	1.94302	13.4623	10.9499	5.4803	11.3057	13.228	14.4854
2410006H16Rik	195.863	0.0629306	1.04459	0.13688	0.459751	0.645695	0.818813	203.22	177.786	166.726	218.085	187.426	200.42	188.72	224.524
2410015M20Rik	123.562	-0.0579348	0.960638	0.171333	-0.338141	0.735257	0.872385	133.803	103.951	158.441	108.586	118.374	121.28	126.107	117.952
2410018L13Rik	67.4986	-0.295563	0.814754	0.22635	-1.30578	0.191627	0.421154	71.4288	74.8062	71.454	80.299	37.266	70.9177	69.6676	64.1496
2410022M11Rik	23.2511	-0.312414	0.805293	0.366887	-0.851526	0.394477	0.63664	39.2355	22.3447	19.6757	21.8997	24.1133	14.3891	24.6923	19.6587
2410131K14Rik	300.524	-0.499054	0.70757	0.127426	-3.91644	8.98666e-05	0.00192733	326.963	327.399	409.048	345.833	241.133	217.892	292.78	243.148
2410137M14Rik	2.51409	0.0276361	1.01934	1.05821	0.0261159	0.979165	NA	2.01208	4.85755	3.1067	0	2.19212	4.11117	1.76374	2.06934
2500002B13Rik	30.8017	0.230051	1.17288	0.302148	0.761386	0.446427	0.679312	25.151	24.2877	32.1025	31.9371	24.1133	32.8894	33.511	42.4215
2500004C02Rik	107.406	-0.195044	0.873546	0.188475	-1.03485	0.300739	0.551057	103.622	125.325	88.023	141.436	97.5494	108.946	108.47	85.8777
2510002D24Rik	83.9357	-0.505301	0.704513	0.205248	-2.4619	0.0138201	0.0767598	126.761	83.5498	90.0942	93.9863	59.1872	61.6676	77.6044	78.635
2510009E07Rik	585.379	0.365435	1.28827	0.0814697	4.48554	7.27304e-06	0.000254889	507.044	506.156	528.138	504.606	701.479	656.76	627.008	651.843
2510016D11Rik	21.9373	-0.463421	0.725264	0.438122	-1.05774	0.290172	0.54061	13.0785	15.5441	33.1381	40.1495	12.0567	15.4169	26.456	19.6587
2510017J16Rik	32.9517	-0.347666	0.785855	0.312721	-1.11175	0.266247	0.513724	54.3261	31.0883	24.8536	37.412	26.3054	31.8616	30.8654	26.9014
2510039O18Rik	216.871	0.42163	1.33944	0.129817	3.24786	0.00116275	0.0130523	156.942	194.302	202.971	187.06	270.727	260.032	236.341	226.593
2510046G10Rik	9.7537	-0.660946	0.632463	0.563303	-1.17334	0.240659	0.484683	18.1087	13.6011	4.14226	11.8623	9.86454	8.22234	7.05494	5.17335
2600006K01Rik	5.02936	-0.367292	0.775236	1.18354	-0.310334	0.756307	NA	8.04831	14.5726	0	0	3.28818	1.02779	0.881868	12.416
2600014E21Rik	82.212	-1.25353	0.41942	0.27308	-4.59035	4.42509e-06	0.000168004	96.5798	80.6353	185.366	101.286	44.9385	54.473	58.2033	36.2135
2610001A08Rik	7.36388	-0.317743	0.802324	0.769488	-0.412927	0.67966	NA	6.03624	14.5726	1.03557	10.9499	2.19212	14.3891	3.52747	6.20802
2610001J05Rik	105.768	0.354303	1.27837	0.183732	1.92837	0.053809	0.193802	78.4711	99.094	82.8452	110.411	106.318	121.28	104.942	142.785
2610002M06Rik	157.817	-0.313679	0.804587	0.138787	-2.26015	0.0238121	0.111534	165.996	172.929	192.615	168.81	132.623	129.502	155.209	144.854
2610005L07Rik	221.02	-0.0514705	0.964952	0.21287	-0.241793	0.808941	0.909622	208.25	190.416	234.038	266.447	198.387	325.81	135.808	209.003
2610008E11Rik	762.224	-0.0457626	0.968778	0.106527	-0.429588	0.667496	0.831816	855.133	640.225	886.444	716.303	722.304	771.872	746.06	759.448
2610011E03Rik	353.662	-0.398075	0.75887	0.105269	-3.78149	0.00015589	0.00288503	419.518	400.262	385.23	404.232	279.495	340.199	321	279.361
2610012C04Rik	33.6867	-0.491296	0.711386	0.316834	-1.55064	0.120988	0.321181	57.3442	33.0313	34.1736	32.8496	38.3621	24.667	27.3379	21.7281
2610017A05Rik	7.17372	-1.12786	0.457594	0.621	-1.8162	0.0693394	NA	10.0604	6.80057	13.4623	9.12488	2.19212	6.16676	4.40934	5.17335
2610020C07Rik	74.045	0.239646	1.1807	0.233461	1.02649	0.30466	0.554726	86.5194	61.2051	64.205	59.3117	97.5494	95.5847	55.5577	72.427
2610021A01Rik	258.345	0.176722	1.13031	0.115587	1.52891	0.126287	0.329458	259.558	226.362	216.433	267.359	279.495	273.393	275.143	269.014
2610024D14Rik	7.89766	0.14028	1.10212	0.596494	0.235174	0.814074	NA	7.04227	8.74358	6.21339	8.2124	7.67242	6.16676	14.9918	4.13868
2610028D06Rik	42.4207	-0.547828	0.684049	0.27254	-2.01008	0.0444224	0.171239	46.2778	48.5755	48.6716	57.4868	49.3227	34.945	28.2198	25.8668
2610028E06Rik	4.00134	-1.23113	0.425984	1.10133	-1.11786	0.263629	NA	2.01208	3.88604	15.5335	0.912488	6.57636	2.05559	0	1.03467
2610035D17Rik	206.071	-0.360461	0.778916	0.144635	-2.49221	0.012695	0.0723218	221.329	249.678	228.86	228.122	155.641	182.947	225.758	156.235
2610035F20Rik	34.4962	0.243346	1.18374	0.30665	0.793564	0.42745	0.663125	42.2536	34.0028	20.7113	29.1996	44.9385	28.7782	32.6291	43.4562
2610037D02Rik	397.104	0.160283	1.11751	0.107628	1.48924	0.136425	0.343805	353.12	398.319	342.772	405.145	428.56	468.673	399.486	380.759
2610042L04Rik	11.0886	0.523291	1.43723	0.484886	1.0792	0.280497	0.530447	13.0785	7.77207	8.28452	7.29991	15.3448	14.3891	13.228	9.31204
2610044O15Rik8	221.111	0.209793	1.15652	0.13207	1.5885	0.112174	0.307316	209.256	188.473	207.113	214.435	253.19	242.559	193.129	260.737
2610203C22Rik	6.43484	0.108322	1.07797	0.7802	0.138839	0.889577	NA	6.03624	2.91453	2.07113	13.6873	6.57636	1.02779	8.81868	10.3467
2610204G07Rik	4.75103	-0.643991	0.63994	0.857258	-0.751221	0.45252	NA	4.02416	2.91453	6.21339	10.0374	6.57636	0	6.17308	2.06934
2610206C17Rik	2.61156	1.07593	2.10808	1.26205	0.852523	0.393924	NA	3.01812	0	0	3.64995	4.38424	7.19455	2.6456	0
2610301B20Rik	155.296	0.404468	1.3236	0.150952	2.67945	0.00737424	0.0494855	154.93	127.268	117.019	135.961	160.025	163.419	203.711	180.033
2610306M01Rik	39.8359	-0.0863535	0.9419	0.291521	-0.296217	0.767064	0.888474	50.302	24.2877	49.7071	40.1495	36.17	31.8616	45.8571	40.3522
2610306O10Rik	2.39507	2.50127	5.66185	1.31574	1.90104	0.0572971	NA	0	0	1.03557	1.82498	4.38424	1.02779	8.81868	2.06934
2610307P16Rik	541.629	-0.257475	0.836551	0.0851003	-3.02555	0.00248182	0.0225531	609.66	562.504	610.983	575.78	492.131	509.785	462.099	510.093
2610316D01Rik	80.2148	0.0636457	1.0451	0.226081	0.281517	0.778314	0.895016	85.5133	87.4358	76.6318	63.8742	78.9163	108.946	55.5577	84.843
2610318N02Rik	266.004	0.597019	1.51259	0.198864	3.00216	0.00268075	0.0237442	226.359	241.906	122.197	255.497	328.818	366.922	240.75	345.58
2610507B11Rik	2177.13	0.0973007	1.06977	0.0725414	1.34131	0.179819	0.406113	1943.67	2195.61	1993.46	2281.22	2158.14	2357.76	2228.48	2258.69
2610507I01Rik	54.0526	0.208731	1.15567	0.245166	0.851384	0.394556	0.63667	47.2838	57.3191	42.4582	53.8368	48.2266	45.2229	74.9588	63.1149
2700012I20Rik	10.4908	-0.010227	0.992936	0.500357	-0.0204393	0.983693	0.993119	15.0906	11.6581	7.24896	8.2124	10.9606	9.25013	13.228	8.27737
2700016F22Rik	15.0403	0.0405147	1.02848	0.451502	0.0897331	0.928499	0.968067	19.1147	9.71509	12.4268	18.2498	7.67242	14.3891	21.1648	17.5894
2700029L08Rik	63.2067	0.0292124	1.02045	0.237191	0.12316	0.901981	0.956635	63.3805	47.604	81.8096	57.4868	80.0124	50.3618	60.8489	64.1496
2700033N17Rik	57.6806	-0.071428	0.951696	0.259659	-0.275084	0.783252	0.897407	68.4107	57.3191	61.0983	49.2744	59.1872	78.1122	35.2747	52.7682
2700038G22Rik	92.9953	0.382146	1.30328	0.207106	1.84517	0.0650131	0.219361	106.64	75.7777	53.8494	86.6864	104.126	105.863	113.761	97.2591
2700046A07Rik	18.8806	-0.38092	0.767948	0.406124	-0.937941	0.348275	0.59639	14.0845	27.2023	27.9603	16.4248	13.1527	20.5559	20.283	11.3814
2700046G09Rik	20.4158	1.05748	2.08129	0.466157	2.26851	0.0232983	0.110103	16.0966	23.3162	7.24896	6.38742	16.4409	26.7226	24.6923	42.4215
2700049A03Rik	620.422	-0.190984	0.876008	0.0945908	-2.01906	0.0434814	0.16877	718.312	634.396	632.73	659.729	655.444	566.314	574.978	521.474
2700054A10Rik	66.1491	-0.276649	0.825506	0.216855	-1.27573	0.20205	0.435377	90.5435	62.1766	65.2406	72.0866	59.1872	67.8343	63.4945	48.6295
2700062C07Rik	69.6806	0.182562	1.1349	0.201944	0.904025	0.365982	0.611689	74.4469	63.1481	65.2406	58.3993	75.6282	85.3068	73.195	62.0802
2700069I18Rik	5.36438	0.0983776	1.07057	0.715877	0.137422	0.890697	NA	4.02416	9.71509	5.17783	1.82498	6.57636	6.16676	5.29121	4.13868
2700078F05Rik	136.144	-0.0635326	0.956918	0.146987	-0.432232	0.665573	0.830709	133.803	159.328	125.303	137.786	133.719	138.752	126.989	133.473
2700081O15Rik	3003.12	-0.301631	0.811335	0.0714231	-4.22316	2.40903e-05	0.00067345	3105.64	3190.44	3678.33	3289.52	2639.31	2860.35	2627.08	2634.27
2700089I24Rik	4.91932	2.49223	5.62646	0.92284	2.70061	0.00692128	NA	1.00604	2.91453	2.07113	0	4.38424	16.4447	5.29121	7.2427
2700097O09Rik	151.303	-0.113074	0.924616	0.162195	-0.697152	0.485708	0.709603	170.021	163.214	136.695	158.773	157.833	169.586	144.626	109.675
2700099C18Rik	184.768	-0.0582259	0.960444	0.152078	-0.382868	0.701817	0.852648	208.25	179.729	147.05	218.085	203.867	168.558	168.437	184.171
2810001G20Rik	73.5392	0.219958	1.1647	0.198613	1.10747	0.26809	0.515624	80.4831	65.0911	57.9916	68.4366	76.7242	81.1956	89.0687	69.3229
2810002D19Rik	99.4224	-0.079538	0.946361	0.182643	-0.435484	0.663211	0.829404	117.707	109.781	94.2364	87.5989	77.8203	97.6403	110.233	100.363
2810004N23Rik	696.594	0.0468661	1.03302	0.0950432	0.493104	0.621939	0.804175	725.354	674.227	603.734	736.378	745.321	763.65	652.582	671.501
2810006K23Rik	184.353	-0.314158	0.80432	0.152839	-2.05548	0.0398329	0.1592	216.298	185.558	171.904	243.634	153.448	142.863	179.019	182.102
2810013P06Rik	75.1823	-0.864497	0.549238	0.216074	-4.00093	6.30938e-05	0.00145895	108.652	84.5213	91.1297	104.024	60.2833	58.5842	59.0852	35.1788
2810021J22Rik	115.073	0.0202907	1.01416	0.162584	0.124801	0.900681	0.95609	106.64	105.895	112.877	131.398	105.222	132.585	111.115	114.848
2810025M15Rik	234.234	-0.0429531	0.970666	0.11163	-0.38478	0.700401	0.852135	242.455	229.276	229.895	249.109	225.788	228.17	230.168	239.009
2810029C07Rik	44.7006	-0.369865	0.773855	0.254173	-1.45517	0.145623	0.357889	55.3322	52.4615	49.7071	43.7994	42.7463	34.945	29.9835	48.6295
2810030D12Rik	2.25541	-0.131251	0.913039	1.23396	-0.106366	0.915292	NA	1.00604	3.88604	0	4.56244	1.09606	3.08338	4.40934	0
2810032G03Rik	23.4971	0.402836	1.3221	0.496139	0.811942	0.416825	0.654616	15.0906	5.82906	46.6004	13.6873	30.6897	23.6392	31.7472	20.6934
2810039B14Rik	55.2211	0.251428	1.19038	0.260622	0.964722	0.334684	0.582827	56.3382	60.2336	41.4226	43.7994	56.9951	80.1678	63.4945	39.3175
2810049E08Rik	38.6987	1.5129	2.85383	0.315059	4.80195	1.57129e-06	7.33719e-05	18.1087	23.3162	18.6402	20.0747	62.4754	82.2234	42.3297	42.4215
2810402E24Rik	71.1614	-0.469806	0.722062	0.244184	-1.92398	0.054357	0.195081	107.646	79.6638	61.0983	82.124	75.6282	40.0839	66.1401	56.9069
2810403D21Rik	51.8029	0.635357	1.55332	0.251908	2.52218	0.0116628	0.0685258	41.2476	42.7464	32.1025	45.6244	72.34	68.8621	43.2115	68.2883
2810403G07Rik	1.34915	-2.15742	0.224157	1.69028	-1.27637	0.201825	NA	2.01208	5.82906	1.03557	0	0	0	0.881868	1.03467
2810405F15Rik	1.44378	-1.59633	0.330716	1.52286	-1.04825	0.294523	NA	0	2.91453	3.1067	2.73747	0	1.02779	1.76374	0
2810405F17Rik	55.1387	-0.165755	0.891462	0.244361	-0.678319	0.49757	0.717978	74.4469	50.5185	43.4937	64.7867	50.4188	58.5842	56.4395	42.4215
2810407A14Rik	7.24105	-0.305673	0.809065	0.843918	-0.362206	0.717198	NA	5.0302	9.71509	14.4979	2.73747	3.28818	15.4169	0	7.2427
2810408A11Rik	139.21	-0.358501	0.779975	0.1546	-2.31889	0.0204008	0.100232	139.839	150.584	168.797	166.985	121.663	103.807	141.981	120.022
2810408I11Rik	21.3287	0.340306	1.26603	0.414706	0.820597	0.411876	0.650763	28.1691	10.6866	21.7469	14.5998	27.4015	28.7782	12.3462	26.9014
2810410L24Rik	112.552	0.103865	1.07465	0.198626	0.522916	0.601033	0.791285	110.664	88.4073	124.268	111.324	77.8203	118.196	133.162	136.577
2810414N06Rik	3.82021	-1.00692	0.497609	0.898709	-1.1204	0.262543	NA	8.04831	2.91453	2.07113	7.29991	1.09606	4.11117	0.881868	4.13868
2810425M01Rik	5.42993	-0.992944	0.502452	0.897174	-1.10675	0.268404	NA	12.0725	3.88604	8.28452	4.56244	10.9606	1.02779	2.6456	0
2810428J06Rik	30.0091	-0.108043	0.927846	0.362009	-0.298454	0.765357	0.887563	44.2657	29.1453	24.8536	26.4622	17.537	46.2507	30.8654	20.6934
2810429I04Rik	108.737	0.366998	1.28967	0.229896	1.59636	0.110408	0.304507	84.5073	99.094	56.9561	138.698	113.99	141.835	113.761	121.056
2810430I11Rik	6.60183	0.682961	1.60543	0.696352	0.980769	0.326706	NA	3.01812	5.82906	5.17783	6.38742	5.4803	4.11117	17.6374	5.17335
2810454H06Rik	35.4129	-0.0804394	0.94577	0.315802	-0.254714	0.798944	0.905315	40.2416	28.1738	36.2448	41.062	25.2094	52.4174	36.1566	23.7974
2810455O05Rik	28.9135	-0.087948	0.94086	0.321587	-0.273481	0.784483	0.897793	30.1812	28.1738	20.7113	40.1495	20.8251	27.7504	33.511	30.0055
2810457G06Rik	5.94627	0.0200237	1.01398	0.712558	0.0281012	0.977581	NA	4.02416	4.85755	7.24896	7.29991	12.0567	4.11117	1.76374	6.20802
2810459M11Rik	74.8274	-1.02305	0.492075	0.340892	-3.0011	0.00269002	0.0237799	89.5375	61.2051	171.904	79.3865	41.6503	34.945	83.7775	36.2135
2810468N07Rik	17.888	0.0797799	1.05686	0.406127	0.196441	0.844265	0.928729	11.0664	18.4587	19.6757	20.0747	23.0173	18.5003	10.5824	21.7281
2900002M20Rik	64.334	-0.251034	0.840294	0.260497	-0.963676	0.335208	0.58356	70.4227	87.4358	65.2406	56.5743	78.9163	33.9172	65.2582	56.9069
2900005J15Rik	2.7615	-0.0236036	0.983772	1.29404	-0.0182402	0.985447	NA	0	2.91453	8.28452	0	2.19212	0	3.52747	5.17335
2900009J06Rik	3.84576	0.272151	1.20761	0.942149	0.288862	0.772687	NA	1.00604	0.971509	9.32009	2.73747	4.38424	5.13896	6.17308	1.03467
2900011O08Rik	258.074	-0.232734	0.851021	0.139344	-1.67021	0.0948771	0.277519	231.389	272.994	348.985	262.797	233.461	219.948	260.151	234.87
2900018N21Rik	5.11912	0.528089	1.44202	0.696499	0.758204	0.448329	NA	4.02416	2.91453	6.21339	3.64995	7.67242	6.16676	6.17308	4.13868
2900022M07Rik	142.096	-0.266777	0.831175	0.177507	-1.50291	0.132862	0.339547	198.19	116.581	166.726	139.611	137.008	114.085	133.162	131.403
2900026A02Rik	754.084	-0.334211	0.793218	0.0953491	-3.50513	0.00045639	0.00653088	852.115	942.364	755.963	814.852	630.235	646.482	746.06	644.6
2900027M19Rik	70.9535	0.51881	1.43277	0.28079	1.84768	0.0646491	0.218351	68.4107	24.2877	78.7029	62.0492	78.9163	91.4736	75.8406	87.947
2900035J10Rik	16.2597	-0.46686	0.723538	0.473963	-0.985013	0.324618	0.573152	14.0845	21.3732	32.1025	8.2124	12.0567	10.2779	18.5192	13.4507
2900037B21Rik	150.949	-0.0625874	0.957545	0.176068	-0.355473	0.722235	0.864559	161.972	129.211	178.117	147.823	111.798	165.475	133.162	180.033
2900040C04Rik	1.77159	-1.27003	0.414651	1.51797	-0.836666	0.402781	NA	0	0	7.24896	2.73747	1.09606	2.05559	0	1.03467
2900045O20Rik	2.00963	4.47764	22.2794	1.44363	3.10166	0.00192437	NA	0	0	0	0	5.4803	3.08338	4.40934	3.10401
2900052L18Rik	93.1407	0.547007	1.46105	0.22395	2.44254	0.0145844	0.0797694	74.4469	55.376	95.272	77.5615	104.126	149.03	83.7775	105.536
2900052N01Rik	13.9576	-1.07086	0.476034	0.46365	-2.30964	0.020908	0.101951	17.1027	26.2308	10.3557	21.8997	9.86454	7.19455	9.70055	9.31204
2900060N12Rik	126.623	0.135615	1.09856	0.150312	0.902223	0.366938	0.612627	130.785	117.553	125.303	109.499	124.951	143.891	135.808	125.195
2900064K03Rik	3.14233	-1.00395	0.498632	1.15315	-0.870613	0.383966	NA	2.01208	0	8.28452	6.38742	3.28818	1.02779	0	4.13868
2900069G24Rik	8.6591	-0.850008	0.554782	0.592706	-1.43412	0.151539	NA	10.0604	11.6581	17.6046	5.47493	3.28818	7.19455	8.81868	5.17335
2900076A07Rik	100.097	-0.370681	0.773417	0.177496	-2.0884	0.0367622	0.150815	130.785	112.695	95.272	112.236	90.973	92.5013	73.195	93.1204
2900078I11Rik	50.099	-0.0280844	0.980722	0.29708	-0.0945349	0.924684	0.967121	40.2416	59.2621	52.8138	50.1869	31.7857	79.14	51.1483	36.2135
2900079G21Rik	40.7617	-0.5036	0.705345	0.306501	-1.64306	0.100371	0.288089	49.2959	35.9458	67.3117	39.237	24.1133	41.1117	43.2115	25.8668
2900089D17Rik	11.1769	1.24933	2.37732	0.58146	2.14861	0.031665	0.136656	5.0302	9.71509	5.17783	6.38742	30.6897	7.19455	9.70055	15.5201
2900092N22Rik	58.9601	0.521987	1.43593	0.237981	2.1934	0.0282787	0.126143	48.2899	51.49	41.4226	52.0118	84.3966	83.2512	59.0852	51.7335
2900093K20Rik	8.94373	-0.431202	0.741643	0.593368	-0.726703	0.467408	NA	10.0604	13.6011	7.24896	10.0374	14.2488	2.05559	7.05494	7.2427
2900097C17Rik	1818.11	-0.238919	0.84738	0.0612927	-3.898	9.69915e-05	0.00205337	1878.28	1975.08	2000.71	2019.34	1698.89	1669.14	1709.06	1594.43
3000002C10Rik	47.4251	-0.0320402	0.978036	0.292056	-0.109706	0.912643	0.961466	41.2476	58.2906	60.0628	32.8496	39.4582	34.945	67.022	45.5255
3010001F23Rik	78.8595	-0.215745	0.861101	0.217063	-0.99393	0.320257	0.569049	94.5677	83.5498	94.2364	66.6117	64.6675	96.6125	58.2033	72.427
3010003L21Rik	26.5171	0.119772	1.08656	0.398618	0.300468	0.76382	0.887006	12.0725	25.2592	43.4937	20.9872	18.633	38.0283	24.6923	28.9708
3100002H09Rik	3.07159	0.580196	1.49505	0.913466	0.635159	0.525325	NA	3.01812	2.91453	3.1067	0.912488	3.28818	2.05559	6.17308	3.10401
3100003L05Rik	1.35866	-0.342272	0.788798	1.68962	-0.202573	0.839469	NA	2.01208	0	4.14226	0	0	0	2.6456	2.06934
3110001I22Rik	54.2913	0.41908	1.33707	0.22457	1.86615	0.0620206	0.212556	44.2657	46.6324	48.6716	46.5369	49.3227	60.6398	67.9038	70.3576
3110006O06Rik	21.5271	-1.34808	0.392813	0.561805	-2.39956	0.0164149	0.0866871	20.1208	19.4302	66.2762	18.2498	9.86454	3.08338	23.8104	11.3814
3110009E18Rik	20.7196	-0.598925	0.660246	0.360776	-1.6601	0.0968934	0.281028	25.151	18.4587	28.9958	27.3747	12.0567	19.5281	17.6374	16.5547
3110009M11Rik	6.33812	6.13305	70.1832	1.19906	5.11489	3.13923e-07	NA	0	0	0	0	8.76848	21.5836	7.93681	12.416
3110021N24Rik	17.873	0.53479	1.44873	0.482908	1.10744	0.268105	0.515624	8.04831	8.74358	11.3912	30.1121	15.3448	16.4447	29.1016	23.7974
3110039I08Rik	4696.12	-0.17045	0.888565	0.0893733	-1.90717	0.0564985	0.199538	4941.66	4662.27	5915.15	4374.47	4482.89	4582.93	4232.97	4376.66
3110039M20Rik	330.72	0.933143	1.90943	0.157457	5.92633	3.09776e-09	3.70347e-07	244.468	244.82	249.571	170.635	420.887	512.869	330.7	471.81
3110040N11Rik	72.0072	-0.722475	0.606057	0.21222	-3.40436	0.000663186	0.00865274	82.4952	88.4073	78.7029	108.586	62.4754	61.6676	50.2665	43.4562
3110045C21Rik	6.3082	-1.65329	0.317914	0.713965	-2.31565	0.0205775	NA	10.0604	15.5441	6.21339	6.38742	3.28818	5.13896	1.76374	2.06934
3110053B16Rik	18.2332	1.79669	3.47422	0.413969	4.34016	1.4238e-05	0.000444462	10.0604	7.77207	10.3557	4.56244	32.8818	26.7226	25.5742	27.9361
3110056K07Rik	114.384	-0.242364	0.845359	0.175528	-1.38077	0.16735	0.389735	137.827	126.296	134.623	97.6363	86.5888	116.141	103.179	112.779
3110062G12Rik	26.854	0.0467346	1.03292	0.360439	0.12966	0.896835	0.954929	29.1751	15.5441	37.2803	23.7247	26.3054	20.5559	22.9286	39.3175
3110067C02Rik	8.93631	-1.26837	0.415129	0.614275	-2.06482	0.0389399	NA	16.0966	10.6866	16.569	7.29991	1.09606	5.13896	5.29121	9.31204
3110070M22Rik	3.7524	-0.841439	0.558087	0.854606	-0.984592	0.324824	NA	4.02416	5.82906	3.1067	6.38742	1.09606	1.02779	4.40934	4.13868
3110080E11Rik	66.0384	-0.958997	0.514414	0.295285	-3.2477	0.0011634	0.0130523	77.465	79.6638	124.268	68.4366	24.1133	45.2229	68.7857	40.3522
3110080O07Rik	104.042	0.385024	1.30588	0.178602	2.15577	0.031102	0.135125	79.4771	103.951	83.8808	93.0738	129.335	135.669	101.415	105.536
3110082I17Rik	164.569	0.505899	1.42001	0.190556	2.65485	0.00793426	0.0520217	112.676	174.872	102.521	153.298	167.697	206.586	164.027	234.87
3110082J24Rik	20.3185	0.764875	1.69922	0.382069	2.00193	0.0452922	0.173088	11.0664	16.5157	13.4623	19.1623	15.3448	29.806	28.2198	28.9708
3110083C13Rik	6.38588	-0.139057	0.908113	0.722531	-0.192458	0.847384	NA	10.0604	1.94302	9.32009	5.47493	2.19212	8.22234	3.52747	10.3467
3110099E03Rik	4.10316	-0.582735	0.667697	0.775427	-0.751502	0.452351	NA	6.03624	3.88604	5.17783	4.56244	3.28818	2.05559	2.6456	5.17335
3222401L13Rik	31.1316	0.440805	1.35736	0.295476	1.49185	0.135739	0.343256	25.151	23.3162	27.9603	29.1996	39.4582	25.6948	37.9203	40.3522
3300002I08Rik	81.3474	-0.038564	0.973624	0.197715	-0.195049	0.845355	0.929146	100.604	80.6353	85.9519	62.9617	74.5321	87.3624	81.1318	77.6003
3830406C13Rik	117.192	-0.0528269	0.964045	0.177829	-0.297066	0.766416	0.88827	110.664	99.094	136.695	130.486	135.911	95.5847	104.942	124.16
3830408C21Rik	36.1959	-0.456375	0.728815	0.274634	-1.66175	0.096562	0.280452	43.2597	35.9458	51.7783	36.4995	35.0739	27.7504	28.2198	31.0401
3830432H09Rik	15.006	-0.262364	0.833721	0.54405	-0.482243	0.629633	0.808553	28.1691	15.5441	7.24896	14.5998	4.38424	10.2779	14.9918	24.8321
3930402G23Rik	2.9028	-0.353717	0.782565	1.09791	-0.322175	0.74732	NA	2.01208	0	8.28452	2.73747	5.4803	1.02779	2.6456	1.03467
4430402I18Rik	8.20295	0.200315	1.14895	0.678936	0.295043	0.767961	NA	3.01812	8.74358	12.4268	6.38742	13.1527	10.2779	10.5824	1.03467
4632404H12Rik	194.1	-0.588449	0.665057	0.134141	-4.38679	1.15038e-05	0.000372206	200.202	232.191	242.322	257.322	168.793	141.835	150.799	159.339
4632411P08Rik	2.42197	-1.89433	0.268999	1.37573	-1.37696	0.168525	NA	5.0302	1.94302	8.28452	0	0	3.08338	0	1.03467
4632415L05Rik	327.023	0.560319	1.4746	0.108002	5.18803	2.12534e-07	1.36744e-05	279.679	262.308	273.389	241.809	402.254	426.534	359.802	370.412
4632418H02Rik	74.561	0.270082	1.20588	0.19925	1.35549	0.175261	0.399779	69.4167	70.9202	62.1339	67.5241	103.03	72.9733	74.9588	75.531
4632427E13Rik	752.858	0.131409	1.09536	0.0882101	1.48973	0.136295	0.343736	765.596	759.72	683.473	665.204	765.05	853.068	725.777	804.974
4633401B06Rik	13.5171	-1.02172	0.492528	0.555762	-1.83841	0.0660013	0.221366	20.1208	33.0313	7.24896	11.8623	14.2488	10.2779	6.17308	5.17335
4731419I09Rik	40.1859	-0.0281308	0.98069	0.270928	-0.103831	0.917303	0.963742	50.302	45.6609	36.2448	30.1121	47.1306	33.9172	38.8022	39.3175
4732414G09Rik	5.61412	0.0588858	1.04166	0.793439	0.0742159	0.940839	NA	10.0604	0.971509	7.24896	3.64995	9.86454	4.11117	1.76374	7.2427
4732416N19Rik	44.7919	-0.401083	0.75729	0.305986	-1.31079	0.189929	0.419226	63.3805	39.8319	45.5649	55.6618	32.8818	22.6114	59.0852	39.3175
4732440D04Rik	129.845	0.866344	1.82304	0.187972	4.6089	4.04801e-06	0.000156868	95.5737	93.2649	103.557	75.7365	140.296	216.864	137.571	175.894
4732463B04Rik	6.6116	-0.587933	0.665295	0.843549	-0.696976	0.485818	NA	5.0302	18.4587	0	8.2124	2.19212	7.19455	3.52747	8.27737
4732471J01Rik	34.1941	-0.15716	0.896789	0.288887	-0.544018	0.586429	0.779978	34.2053	44.6894	36.2448	29.1996	24.1133	39.0561	30.8654	35.1788
4732490B19Rik	2.50901	-1.55288	0.34083	1.09632	-1.41644	0.156646	NA	3.01812	3.88604	6.21339	1.82498	2.19212	2.05559	0.881868	0
4732491K20Rik	33.7504	0.200138	1.14881	0.32	0.625431	0.531688	0.742066	28.1691	38.8604	41.4226	17.3373	43.8424	35.9727	34.3928	30.0055
4732496C06Rik	14.2911	-0.631727	0.645404	0.47737	-1.32335	0.185719	0.413939	20.1208	9.71509	25.8891	13.6873	12.0567	9.25013	7.05494	16.5547
4831440E17Rik	6.94905	0.223468	1.16754	0.752787	0.296854	0.766578	NA	9.05435	0.971509	10.3557	5.47493	5.4803	7.19455	14.9918	2.06934
4833412C15Rik	89.375	-0.0791425	0.94662	0.23216	-0.340897	0.733181	0.871606	107.646	76.7492	97.3431	85.7739	88.7809	116.141	90.8324	51.7335
4833412K13Rik	22.6091	-0.0565215	0.96158	0.377037	-0.14991	0.880836	0.948285	30.1812	28.1738	15.5335	18.2498	31.7857	18.5003	22.9286	15.5201
4833413E03Rik	1.87083	-0.11345	0.924375	3.31083	-0.0342662	0.972665	NA	0	7.77207	0	0	0	7.19455	0	0
4833413G10Rik	32.5293	0.388548	1.30908	0.322951	1.20312	0.22893	0.470605	37.2235	14.5726	28.9958	31.9371	36.17	29.806	37.0385	44.4908
4833417C18Rik	5.15838	0.094706	1.06785	0.753961	0.125611	0.90004	NA	9.05435	2.91453	6.21339	1.82498	3.28818	6.16676	3.52747	8.27737
4833418N02Rik	39.5059	-0.481443	0.716261	0.341273	-1.41073	0.158325	0.376535	38.2295	25.2592	79.7385	41.062	33.9779	27.7504	31.7472	38.2828
4833420G17Rik	923.853	-0.203172	0.868639	0.0726188	-2.79778	0.00514545	0.0382606	954.731	1038.54	1008.64	953.55	886.713	858.207	873.049	817.39
4833421G17Rik	8.67562	0.0640417	1.04539	0.586635	0.109168	0.913069	NA	9.05435	5.82906	5.17783	13.6873	15.3448	6.16676	7.93681	6.20802
4833421K07Rik	9.88586	-0.641272	0.641147	0.564307	-1.13639	0.255793	0.502144	13.0785	10.6866	11.3912	12.7748	16.4409	6.16676	4.40934	4.13868
4833422C13Rik	5.89416	0.0919528	1.06581	0.71429	0.128733	0.897569	NA	7.04227	5.82906	7.24896	2.73747	2.19212	7.19455	3.52747	11.3814
4833422M21Rik	37.3245	0.453323	1.36919	0.325605	1.39225	0.163848	0.384675	32.1933	29.1453	48.6716	16.4248	32.8818	46.2507	42.3297	50.6989
4833427G06Rik	2.99937	0.323017	1.25094	0.95794	0.337199	0.735967	NA	1.00604	2.91453	2.07113	4.56244	3.28818	6.16676	0.881868	3.10401
4833439L19Rik	950.121	-0.246438	0.842975	0.0875645	-2.81436	0.0048874	0.0368622	961.774	994.826	1153.62	1015.6	825.333	903.43	938.307	808.078
4833445I07Rik	9.08665	0.0263809	1.01845	0.534231	0.049381	0.960616	NA	6.03624	6.80057	11.3912	11.8623	6.57636	9.25013	11.4643	9.31204
4921504A21Rik	14.1632	0.206928	1.15423	0.439251	0.471093	0.637574	0.813595	13.0785	12.6296	9.32009	17.3373	21.9212	11.3057	13.228	14.4854
4921507P07Rik	7.86327	0.613115	1.52956	0.663019	0.924732	0.355105	NA	5.0302	7.77207	9.32009	2.73747	7.67242	8.22234	3.52747	18.6241
4921508M14Rik	2.83107	1.47955	2.78862	1.02844	1.43863	0.150256	NA	2.01208	0.971509	2.07113	0.912488	5.4803	4.11117	0.881868	6.20802
4921524J17Rik	159.404	-0.137775	0.90892	0.175605	-0.784574	0.432703	0.66766	122.737	169.043	200.9	176.11	128.239	148.002	184.31	145.889
4921531C22Rik	38.9487	0.407015	1.32594	0.338595	1.20207	0.229336	0.471108	35.2114	24.2877	23.818	50.1869	64.6675	27.7504	37.0385	48.6295
4921534A09Rik	2.23978	-0.977026	0.508026	1.05364	-0.927288	0.353777	NA	3.01812	2.91453	4.14226	1.82498	2.19212	1.02779	1.76374	1.03467
4921536K21Rik	18.0653	-0.439423	0.73743	0.439549	-0.999713	0.317449	0.56685	31.1872	11.6581	16.569	23.7247	16.4409	8.22234	14.9918	21.7281
4921539H07Rik	1.86489	-0.978431	0.507531	1.32936	-0.736018	0.46172	NA	0	4.85755	4.14226	0.912488	0	2.05559	0.881868	2.06934
4930402H24Rik	1306.22	-0.095501	0.935947	0.0966415	-0.988199	0.323055	0.571577	1370.23	1201.76	1612.37	1214.52	1223.2	1299.13	1261.07	1267.47
4930404H11Rik	3.03977	-0.0336081	0.976974	0.975462	-0.0344535	0.972515	NA	1.00604	1.94302	1.03557	8.2124	3.28818	3.08338	2.6456	3.10401
4930404N11Rik	7.79764	0.169619	1.12476	0.657999	0.257781	0.796576	NA	3.01812	3.88604	12.4268	10.0374	13.1527	5.13896	10.5824	4.13868
4930405A21Rik	12.3911	0.0641604	1.04548	0.475207	0.135016	0.8926	0.952977	9.05435	16.5157	8.28452	14.5998	10.9606	16.4447	14.9918	8.27737
4930405O22Rik	37.7813	0.316206	1.24505	0.298797	1.05826	0.289936	0.540481	37.2235	20.4017	31.067	45.6244	51.5148	43.1673	37.0385	36.2135
4930412C18Rik	3.10721	2.00466	4.01295	1.08066	1.85503	0.0635923	NA	3.01812	0.971509	1.03557	0	6.57636	1.02779	7.05494	5.17335
4930412F12Rik	23.353	0.24541	1.18543	0.343374	0.714701	0.474794	0.701099	23.1389	26.2308	20.7113	15.5123	21.9212	32.8894	24.6923	21.7281
4930412L05Rik	1.74599	0.905747	1.87351	1.44979	0.624744	0.532139	NA	3.01812	0	0	1.82498	0	5.13896	0.881868	3.10401
4930412M03Rik	2.23228	-1.43627	0.369522	1.3391	-1.07256	0.283468	NA	6.03624	1.94302	5.17783	0	0	2.05559	2.6456	0
4930412O13Rik	1.32001	2.11496	4.33178	1.939	1.09075	0.275383	NA	2.01208	0	0	0	0	0	4.40934	4.13868
4930423D22Rik	1.84491	-3.5019	0.0882718	1.44777	-2.41883	0.0155705	NA	4.02416	3.88604	4.14226	1.82498	0	0	0.881868	0
4930426D05Rik	2.36494	1.18337	2.27106	1.11396	1.06231	0.288096	NA	0	1.94302	1.03557	2.73747	4.38424	5.13896	2.6456	1.03467
4930426I24Rik	8.3753	-0.233105	0.850802	0.567749	-0.410578	0.681382	NA	5.0302	7.77207	13.4623	10.0374	6.57636	9.25013	9.70055	5.17335
4930426L09Rik	1.49778	0.501119	1.41531	1.30694	0.38343	0.701401	NA	2.01208	1.94302	1.03557	0	1.09606	1.02779	1.76374	3.10401
4930428N03Rik	15.0352	-0.537624	0.688904	0.40937	-1.3133	0.189083	0.418291	20.1208	18.4587	13.4623	19.1623	10.9606	14.3891	12.3462	11.3814
4930429F24Rik	5.36822	-0.115168	0.923275	0.821579	-0.140179	0.888518	NA	8.04831	3.88604	5.17783	5.47493	1.09606	3.08338	14.1099	2.06934
4930430F08Rik	65.2204	-0.251503	0.840021	0.209052	-1.20307	0.228951	0.470605	62.3744	72.8632	78.7029	69.3491	58.0912	60.6398	49.3846	70.3576
4930430O22Rik	7.5101	-0.233288	0.850694	0.627898	-0.371538	0.710237	NA	7.04227	7.77207	9.32009	8.2124	7.67242	3.08338	3.52747	13.4507
4930431P19Rik	29.2989	0.300468	1.23154	0.327968	0.916149	0.359589	0.606048	36.2174	17.4872	25.8891	25.5497	25.2094	43.1673	30.8654	30.0055
4930432B10Rik	5.66325	1.8444	3.59103	1.03007	1.79056	0.073364	NA	0	5.82906	3.1067	0.912488	6.57636	13.3613	0	15.5201
4930432K21Rik	26.5325	-0.15722	0.896752	0.349473	-0.449876	0.6528	0.823116	31.1872	20.4017	30.0314	30.1121	23.0173	20.5559	17.6374	39.3175
4930439D14Rik	9.70888	-0.186654	0.878641	0.692234	-0.26964	0.787437	0.899311	18.1087	3.88604	16.569	2.73747	17.537	9.25013	4.40934	5.17335
4930444P10Rik	8.45781	1.01862	2.02599	0.581031	1.75313	0.0795792	NA	7.04227	3.88604	3.1067	8.2124	13.1527	7.19455	10.5824	14.4854
4930445E18Rik	2.47339	0.132856	1.09646	1.18874	0.111761	0.911013	NA	0	1.94302	2.07113	5.47493	0	2.05559	6.17308	2.06934
4930447C04Rik	17.3974	0.1227	1.08877	0.384644	0.318997	0.749729	0.879686	19.1147	17.4872	16.569	13.6873	15.3448	14.3891	22.9286	19.6587
4930447K03Rik	4.75543	-1.29796	0.4067	0.76631	-1.69379	0.0903061	NA	4.02416	7.77207	5.17783	10.0374	2.19212	2.05559	2.6456	4.13868
4930447M23Rik	7.49474	-0.16761	0.890316	0.67381	-0.24875	0.803554	NA	2.01208	8.74358	15.5335	5.47493	6.57636	11.3057	6.17308	4.13868
4930448E22Rik	3.1792	-0.85292	0.553663	1.26585	-0.673795	0.500442	NA	1.00604	0	14.4979	0.912488	3.28818	3.08338	2.6456	0
4930449I04Rik	4.25143	-1.30275	0.405353	0.848547	-1.53527	0.124718	NA	3.01812	7.77207	6.21339	7.29991	0	4.11117	3.52747	2.06934
4930451G09Rik	43.0969	-0.426854	0.743882	0.318097	-1.3419	0.179629	0.406113	74.4469	34.0028	39.3515	50.1869	26.3054	49.3341	43.2115	27.9361
4930452B06Rik	189.405	-0.509088	0.702666	0.154449	-3.29616	0.000980167	0.0115257	219.317	253.564	170.868	246.372	152.352	146.974	179.901	145.889
4930452G13Rik	1.3152	0.216356	1.1618	1.57764	0.137139	0.890921	NA	0	0	3.1067	1.82498	0	1.02779	3.52747	1.03467
4930453N24Rik	419.104	0.57847	1.49326	0.119543	4.83902	1.30483e-06	6.32054e-05	367.204	383.746	260.962	332.146	511.86	518.008	477.091	501.815
4930455C13Rik	2.66027	2.68999	6.45307	1.31437	2.04659	0.0406981	NA	0	0	0	2.73747	9.86454	3.08338	3.52747	2.06934
4930458D05Rik	1.42646	-3.09628	0.11693	1.74021	-1.77926	0.0751967	NA	3.01812	0.971509	0	6.38742	0	0	0	1.03467
4930465I24Rik	2.4191	0.693022	1.61667	1.31492	0.527047	0.598161	NA	0	0	0	7.29991	2.19212	4.11117	2.6456	3.10401
4930465K10Rik	3.06114	-0.277324	0.82512	1.05556	-0.262727	0.792761	NA	1.00604	3.88604	2.07113	6.38742	6.57636	0	3.52747	1.03467
4930466K18Rik	36.4362	0.526987	1.44092	0.281872	1.8696	0.0615397	0.21145	37.2235	25.2592	34.1736	22.8122	48.2266	46.2507	36.1566	41.3868
4930470G03Rik	5.07863	0.539138	1.4531	0.747155	0.721589	0.470547	NA	4.02416	3.88604	5.17783	3.64995	3.28818	3.08338	12.3462	5.17335
4930471C04Rik	4.18849	-1.08921	0.47002	1.11231	-0.979226	0.327469	NA	2.01208	0	14.4979	6.38742	0	1.02779	4.40934	5.17335
4930471M09Rik	1.70097	0.38887	1.30937	1.33232	0.291874	0.770383	NA	0	1.94302	3.1067	0.912488	0	3.08338	3.52747	1.03467
4930473A02Rik	4.06133	-1.15444	0.44924	0.899879	-1.28289	0.199532	NA	2.01208	3.88604	8.28452	8.2124	1.09606	1.02779	1.76374	6.20802
4930474H06Rik	3.11584	-2.02841	0.245125	1.0536	-1.92523	0.0542009	NA	2.01208	5.82906	3.1067	9.12488	0	2.05559	1.76374	1.03467
4930474N09Rik	6.66182	-0.447856	0.733131	0.658763	-0.679844	0.496603	NA	3.01812	7.77207	7.24896	12.7748	4.38424	5.13896	8.81868	4.13868
4930478K11Rik	1.50428	-1.54658	0.34232	1.52507	-1.01411	0.310532	NA	2.01208	0.971509	4.14226	1.82498	0	3.08338	0	0
4930479H17Rik	2.5726	-1.38073	0.384023	1.28642	-1.07332	0.283128	NA	1.00604	3.88604	0	10.0374	1.09606	1.02779	3.52747	0
4930480K02Rik	1.28973	0.730352	1.65904	1.78484	0.409198	0.682395	NA	3.01812	0	0	0.912488	1.09606	0	5.29121	0
4930480K23Rik	46.2561	-0.355487	0.781606	0.246924	-1.43966	0.149964	0.36452	60.3624	41.7749	59.0272	46.5369	41.6503	45.2229	36.1566	39.3175
4930481A15Rik	12.9622	0.361615	1.28486	0.459473	0.787021	0.43127	0.666414	11.0664	14.5726	13.4623	6.38742	10.9606	18.5003	13.228	15.5201
4930481B07Rik	21.8957	-0.572995	0.67222	0.365364	-1.56829	0.116814	0.315313	32.1933	22.3447	32.1025	18.2498	13.1527	20.5559	15.8736	20.6934
4930483O08Rik	2.17485	-1.48716	0.356714	1.48527	-1.00128	0.316694	NA	3.01812	5.82906	4.14226	0	0	0	4.40934	0
4930488L21Rik	28.4197	-0.204051	0.86811	0.329142	-0.619948	0.535292	0.744506	24.1449	23.3162	43.4937	31.0246	19.7291	30.8338	29.9835	24.8321
4930500F10Rik	3.11306	0.0853582	1.06095	1.15808	0.0737067	0.941244	NA	3.01812	4.85755	4.14226	0	8.76848	3.08338	0	1.03467
4930500L23Rik	1.35792	0.39418	1.3142	1.60788	0.245155	0.806336	NA	0	0.971509	0	3.64995	1.09606	4.11117	0	1.03467
4930503L19Rik	346.316	0.0923869	1.06613	0.136017	0.679228	0.496993	0.71753	345.071	336.142	252.678	406.057	371.564	329.921	348.338	380.759
4930506C21Rik	2.25283	-1.30854	0.403728	1.37146	-0.954125	0.34002	NA	2.01208	0	6.21339	4.56244	1.09606	0	0	4.13868
4930507D05Rik	5.15433	-1.0671	0.477279	0.8612	-1.23908	0.215316	NA	1.00604	7.77207	6.21339	12.7748	3.28818	2.05559	0.881868	7.2427
4930509G22Rik	1.55861	1.11783	2.1702	1.36477	0.81906	0.412752	NA	2.01208	0.971509	1.03557	0	1.09606	1.02779	5.29121	1.03467
4930509H03Rik	31.5236	-0.0642999	0.956409	0.31697	-0.202858	0.839246	0.926954	25.151	41.7749	37.2803	24.6372	30.6897	25.6948	25.5742	41.3868
4930513D17Rik	1.95945	1.57846	2.98651	1.22887	1.28448	0.198974	NA	1.00604	0	2.07113	0.912488	1.09606	4.11117	4.40934	2.06934
4930513N10Rik	21.2909	-1.30694	0.404177	0.417618	-3.12951	0.00175095	0.0177272	22.1329	41.7749	21.7469	35.587	16.4409	13.3613	14.1099	5.17335
4930515G01Rik	9.17309	-0.0827954	0.944226	0.711166	-0.116422	0.907318	NA	9.05435	11.6581	11.3912	5.47493	25.2094	3.08338	4.40934	3.10401
4930516B21Rik	2.18097	-3.76261	0.0736789	1.53792	-2.44655	0.014423	NA	6.03624	0	4.14226	6.38742	0	0	0.881868	0
4930517E14Rik	5.03812	-0.552949	0.681626	0.90286	-0.612441	0.540246	NA	5.0302	0	13.4623	5.47493	2.19212	5.13896	1.76374	7.2427
4930518I15Rik	48.9976	0.408551	1.32735	0.245424	1.66468	0.0959772	0.279433	49.2959	43.7179	34.1736	41.062	64.6675	62.6954	52.9121	43.4562
4930519F16Rik	2.65916	0.124932	1.09046	1.33257	0.0937525	0.925306	NA	0	1.94302	8.28452	0	2.19212	0	2.6456	6.20802
4930519P11Rik	1.80617	-3.46393	0.0906259	1.50089	-2.30791	0.021004	NA	1.00604	2.91453	3.1067	6.38742	0	0	0	1.03467
4930520O04Rik	45.1816	0.136317	1.0991	0.277752	0.490786	0.623578	0.805294	48.2899	41.7749	43.4937	39.237	35.0739	52.4174	67.022	34.1441
4930522L14Rik	50.5416	0.805313	1.74752	0.291719	2.76057	0.00576997	0.0415305	26.157	28.1738	50.7427	41.9745	52.6109	78.1122	45.8571	80.7043
4930523C07Rik	11.811	0.310961	1.24053	0.523121	0.594435	0.552221	0.756141	4.02416	12.6296	13.4623	11.8623	16.4409	16.4447	6.17308	13.4507
4930524J08Rik	12.9823	0.999499	1.99931	0.499056	2.00278	0.0452012	0.172858	16.0966	5.82906	7.24896	5.47493	17.537	21.5836	11.4643	18.6241
4930524O07Rik	20.2684	-0.0988838	0.933755	0.47961	-0.206176	0.836654	0.925744	34.2053	27.2023	10.3557	11.8623	30.6897	22.6114	9.70055	15.5201
4930525G20Rik	5.05567	-0.104691	0.930004	0.823954	-0.127059	0.898894	NA	4.02416	0.971509	11.3912	4.56244	3.28818	6.16676	1.76374	8.27737
4930526A20Rik	7.54879	-0.337997	0.791139	0.703246	-0.480624	0.630784	NA	5.0302	7.77207	7.24896	13.6873	0	9.25013	7.05494	10.3467
4930527F14Rik	2.53856	-0.950423	0.517481	1.17321	-0.810105	0.41788	NA	0	1.94302	4.14226	7.29991	0	2.05559	1.76374	3.10401
4930532G15Rik	9.2219	-1.24687	0.42136	0.573679	-2.17347	0.0297449	NA	16.0966	19.4302	8.28452	8.2124	4.38424	5.13896	7.05494	5.17335
4930534H18Rik	2.56192	0.938851	1.917	1.33969	0.700796	0.483431	NA	0	1.94302	5.17783	0	0	6.16676	6.17308	1.03467
4930537H20Rik	6.00722	-0.820691	0.566171	0.657607	-1.248	0.212032	NA	7.04227	6.80057	10.3557	6.38742	6.57636	4.11117	2.6456	4.13868
4930539J05Rik	37.0274	-0.832908	0.561397	0.291285	-2.85943	0.00424405	0.0332348	62.3744	43.7179	40.387	42.887	31.7857	30.8338	19.4011	24.8321
4930542C16Rik	1.42163	0.836109	1.78523	1.45024	0.576532	0.564256	NA	1.00604	0	3.1067	0	3.28818	2.05559	0.881868	1.03467
4930542D17Rik	1.41818	-1.45668	0.36433	1.78957	-0.813986	0.415653	NA	0	0.971509	0	7.29991	2.19212	0	0.881868	0
4930544D05Rik	2.17397	-1.67891	0.312318	1.34583	-1.24749	0.212219	NA	2.01208	0.971509	1.03557	9.12488	2.19212	2.05559	0	0
4930544I03Rik	1.3918	-1.30527	0.404645	1.67926	-0.777291	0.436987	NA	0	2.91453	3.1067	1.82498	3.28818	0	0	0
4930547M16Rik	2.7256	1.48295	2.79521	1.06614	1.39096	0.164238	NA	0	0.971509	1.03557	3.64995	4.38424	6.16676	3.52747	2.06934
4930548H24Rik	13.8546	-1.39745	0.3796	0.497151	-2.81091	0.00494019	0.037144	28.1691	18.4587	21.7469	11.8623	9.86454	11.3057	5.29121	4.13868
4930549G23Rik	4.73129	-0.71042	0.611142	0.997507	-0.712195	0.476344	NA	11.0664	0	4.14226	8.2124	7.67242	4.11117	2.6456	0
4930550C14Rik	2.08631	0.232918	1.17521	1.18875	0.195934	0.844662	NA	1.00604	3.88604	0	2.73747	1.09606	1.02779	1.76374	5.17335
4930553I21Rik	2.59441	-0.677995	0.625034	1.12869	-0.600693	0.548045	NA	1.00604	7.77207	3.1067	0.912488	0	2.05559	1.76374	4.13868
4930553P18Rik	3.14871	-0.601133	0.659236	1.03531	-0.580629	0.561491	NA	1.00604	0.971509	3.1067	10.0374	1.09606	5.13896	1.76374	2.06934
4930556H04Rik	15.0419	0.187649	1.13891	0.561846	0.333986	0.73839	0.874001	16.0966	9.71509	2.07113	28.2871	12.0567	14.3891	21.1648	16.5547
4930556J24Rik	2.86246	1.18606	2.27531	1.02842	1.15328	0.248795	NA	1.00604	1.94302	4.14226	0	3.28818	2.05559	5.29121	5.17335
4930556M19Rik	35.7923	-0.26807	0.83043	0.297728	-0.900386	0.367915	0.613529	30.1812	34.0028	47.636	44.7119	35.0739	37.0005	37.0385	20.6934
4930557K07Rik	2.76156	-0.0181127	0.987524	1.34763	-0.0134404	0.989276	NA	1.00604	2.91453	7.24896	0	0	0	2.6456	8.27737
4930558J18Rik	24.4912	-0.580847	0.668571	0.368179	-1.57762	0.114653	0.311124	30.1812	25.2592	38.3159	23.7247	26.3054	9.25013	21.1648	21.7281
4930558J22Rik	3.00577	1.34445	2.53933	0.996448	1.34924	0.177259	NA	1.00604	0	2.07113	3.64995	6.57636	4.11117	3.52747	3.10401
4930563E22Rik	45.611	0.0168642	1.01176	0.262763	0.0641803	0.948827	0.977056	41.2476	38.8604	46.6004	54.7493	46.0345	30.8338	53.7939	52.7682
4930567H12Rik	1.97824	-1.17249	0.443656	1.30863	-0.895967	0.370271	NA	3.01812	0	6.21339	1.82498	1.09606	1.02779	2.6456	0
4930570G19Rik	45.1055	-0.0997176	0.933216	0.300201	-0.33217	0.739761	0.874423	45.2718	28.1738	72.4896	41.062	33.9779	44.1951	44.9753	50.6989
4930577N17Rik	3.55379	-0.921724	0.527878	0.901838	-1.02205	0.306757	NA	7.04227	5.82906	3.1067	2.73747	0	3.08338	3.52747	3.10401
4930578C19Rik	10.7538	0.324143	1.25192	0.537176	0.603421	0.546229	0.752208	15.0906	6.80057	7.24896	9.12488	16.4409	10.2779	15.8736	5.17335
4930578G10Rik	20.2653	0.381956	1.30311	0.358667	1.06493	0.286906	0.537673	13.0785	22.3447	16.569	18.2498	25.2094	25.6948	20.283	20.6934
4930578M01Rik	217.084	-0.512122	0.70119	0.148992	-3.43725	0.000587645	0.00792474	243.462	209.846	311.705	256.409	179.754	193.225	192.247	150.027
4930578M07Rik	1.48898	-1.65225	0.318144	1.7387	-0.950279	0.34197	NA	7.04227	0	2.07113	0	0	0	1.76374	1.03467
4930579G18Rik	3.45079	0.00459177	1.00319	0.942582	0.00487148	0.996113	NA	5.0302	0	5.17783	3.64995	1.09606	5.13896	4.40934	3.10401
4930579G24Rik	30.1746	0.330772	1.25769	0.303099	1.0913	0.275141	0.524858	23.1389	25.2592	23.818	34.6746	29.5936	39.0561	37.9203	27.9361
4930579K19Rik	13.2792	-0.0705432	0.952279	0.535017	-0.131852	0.895101	0.954313	21.1268	6.80057	6.21339	20.0747	20.8251	12.3335	10.5824	8.27737
4930581F22Rik	43.6069	-0.523572	0.695647	0.270214	-1.93762	0.0526697	0.191142	42.2536	54.4045	53.8494	54.7493	35.0739	42.1395	22.9286	43.4562
4930589L23Rik	1.87162	-0.138899	0.908212	1.23658	-0.112325	0.910566	NA	3.01812	1.94302	1.03557	1.82498	1.09606	0	0.881868	5.17335
4930589O11Rik	5.28305	-0.191152	0.875906	0.73312	-0.260737	0.794295	NA	6.03624	5.82906	6.21339	4.56244	1.09606	9.25013	6.17308	3.10401
4930590J08Rik	29.2386	-0.466877	0.723529	0.325851	-1.43279	0.151918	0.367836	49.2959	26.2308	28.9958	31.0246	29.5936	21.5836	20.283	26.9014
4930594C11Rik	6.40818	0.527353	1.44128	0.74174	0.710967	0.477105	NA	5.0302	5.82906	9.32009	0.912488	12.0567	2.05559	8.81868	7.2427
4930594M22Rik	27.384	0.0946646	1.06782	0.35643	0.265591	0.790554	0.900674	26.157	26.2308	22.7824	31.0246	26.3054	14.3891	43.2115	28.9708
4930596I21Rik	24.8175	-0.0507969	0.965403	0.35759	-0.142054	0.887038	0.95039	20.1208	32.0598	28.9958	20.0747	18.633	16.4447	29.1016	33.1095
4930597L12Rik	16.2142	0.580853	1.49573	0.433217	1.34079	0.179989	0.406277	8.04831	7.77207	19.6757	16.4248	23.0173	16.4447	17.6374	20.6934
4930598A11Rik	1.82385	0.203512	1.1515	1.1832	0.172001	0.863437	NA	2.01208	1.94302	1.03557	1.82498	2.19212	2.05559	3.52747	0
4930599N23Rik	2.61336	0.187834	1.13905	1.08504	0.173112	0.862564	NA	6.03624	0.971509	0	2.73747	4.38424	1.02779	2.6456	3.10401
4931406C07Rik	115.644	-0.225647	0.855211	0.174676	-1.2918	0.196425	0.42769	149.9	95.2079	131.517	122.273	112.894	104.835	110.233	98.2937
4931406G06Rik	1.61936	-4.1247	0.0573248	1.7408	-2.36942	0.0178158	NA	2.01208	6.80057	4.14226	0	0	0	0	0
4931406P16Rik	565.216	0.0978578	1.07018	0.0949979	1.0301	0.302961	0.552923	510.062	613.994	550.921	509.169	589.68	545.758	574.096	628.045
4931409K22Rik	13.4616	-0.754297	0.592835	0.499471	-1.51019	0.130995	0.336766	16.0966	12.6296	11.3912	27.3747	12.0567	4.11117	10.5824	13.4507
4931414P19Rik	120.554	-0.141133	0.906806	0.244194	-0.577956	0.563294	0.763754	123.743	121.439	187.437	73.9116	93.1651	97.6403	130.516	136.577
4931415C17Rik	4.90357	-1.19123	0.43793	0.734495	-1.62183	0.104839	NA	8.04831	8.74358	4.14226	6.38742	2.19212	3.08338	3.52747	3.10401
4931423N10Rik	2.82951	-0.870297	0.547034	1.01446	-0.85789	0.390953	NA	3.01812	2.91453	4.14226	4.56244	1.09606	5.13896	1.76374	0
4931428F04Rik	569.308	0.0148397	1.01034	0.1178	0.125974	0.899753	0.955632	573.442	490.612	700.042	501.869	590.776	608.453	538.821	550.445
4931431C16Rik	1.74161	0.837385	1.78681	1.36337	0.614203	0.539081	NA	0	0	4.14226	0.912488	3.28818	1.02779	3.52747	1.03467
4931440F15Rik	7.22898	-0.122719	0.918455	0.597375	-0.20543	0.837236	NA	7.04227	4.85755	8.28452	10.0374	6.57636	7.19455	9.70055	4.13868
4931440J10Rik	6.17479	1.02018	2.02817	0.901715	1.13137	0.257898	NA	2.01208	7.77207	1.03557	5.47493	12.0567	0	15.8736	5.17335
4931440P22Rik	9.33297	0.296529	1.22819	0.551103	0.538065	0.590532	NA	9.05435	5.82906	11.3912	7.29991	13.1527	12.3335	11.4643	4.13868
4932422M17Rik	36.0463	-0.776878	0.583628	0.275795	-2.81687	0.00484942	0.0366577	46.2778	50.5185	42.4582	42.887	23.0173	22.6114	26.456	34.1441
4932438A13Rik	2158.08	-0.0133857	0.990765	0.0741963	-0.18041	0.856831	0.935103	2233.41	2058.63	2392.16	1989.22	2125.26	2250.87	2114.72	2100.38
4932438H23Rik	2.47279	0.347001	1.27191	1.17643	0.294962	0.768023	NA	1.00604	0	3.1067	4.56244	3.28818	0	2.6456	5.17335
4932441J04Rik	12.6551	-0.0898263	0.939636	0.475561	-0.188885	0.850183	0.931587	11.0664	8.74358	10.3557	21.8997	9.86454	13.3613	11.4643	14.4854
4932442E05Rik	1.36479	0.329654	1.25671	1.45001	0.227345	0.820155	NA	0	0	2.07113	2.73747	1.09606	1.02779	0.881868	3.10401
4932443L11Rik	6.46826	0.594406	1.50985	0.823736	0.721598	0.470542	NA	12.0725	3.88604	0	4.56244	9.86454	9.25013	1.76374	10.3467
4933400F21Rik	2.71672	0.59512	1.5106	1.1727	0.507477	0.61182	NA	3.01812	0	1.03557	4.56244	0	4.11117	1.76374	7.2427
4933403O08Rik	3.75873	0.656369	1.57611	0.927448	0.707715	0.479122	NA	5.0302	2.91453	0	3.64995	3.28818	4.11117	1.76374	9.31204
4933404O12Rik	91.2456	0.0142491	1.00993	0.181937	0.078319	0.937574	0.972058	88.5315	92.2934	93.2009	88.5114	105.222	95.5847	71.4313	95.1897
4933405D12Rik	4.0194	-0.0566142	0.961518	0.865072	-0.0654445	0.94782	NA	7.04227	1.94302	1.03557	6.38742	2.19212	2.05559	5.29121	6.20802
4933406B17Rik	4.42645	0.328559	1.25576	1.0597	0.310048	0.756525	NA	0	12.6296	3.1067	0	4.38424	6.16676	7.05494	2.06934
4933406C10Rik	8.97027	0.191728	1.14213	0.653966	0.293178	0.769386	NA	11.0664	12.6296	7.24896	2.73747	2.19212	15.4169	13.228	7.2427
4933406I18Rik	9.65073	0.29168	1.22406	0.57432	0.50787	0.611545	0.798235	16.0966	9.71509	6.21339	2.73747	13.1527	10.2779	9.70055	9.31204
4933406P04Rik	14.6633	-1.51935	0.348844	0.443368	-3.42683	0.000610682	0.00817006	23.1389	21.3732	17.6046	24.6372	8.76848	9.25013	5.29121	7.2427
4933407K13Rik	172.746	0.0850024	1.06069	0.160809	0.528591	0.597089	0.787488	171.027	157.385	157.406	184.323	149.064	220.975	147.272	194.518
4933407L21Rik	18.0535	-0.684043	0.622419	0.530576	-1.28925	0.197313	0.428787	5.0302	33.0313	12.4268	38.3245	14.2488	15.4169	11.4643	14.4854
4933408B17Rik	40.4385	-0.572678	0.672368	0.274253	-2.08814	0.0367855	0.150874	66.3986	42.7464	40.387	43.7994	32.8818	37.0005	28.2198	32.0748
4933411K16Rik	5.2976	-0.561506	0.677595	0.707598	-0.793537	0.427465	NA	8.04831	7.77207	2.07113	7.29991	4.38424	5.13896	3.52747	4.13868
4933412A08Rik	1.46437	-0.417354	0.748797	1.42493	-0.292895	0.769602	NA	1.00604	0.971509	1.03557	3.64995	3.28818	0	1.76374	0
4933412E12Rik	7.12453	-0.265529	0.831894	0.603546	-0.439949	0.659974	NA	5.0302	5.82906	9.32009	10.9499	6.57636	4.11117	7.93681	7.2427
4933413C19Rik	7.0903	1.05923	2.08381	0.72337	1.46429	0.143114	NA	5.0302	5.82906	2.07113	5.47493	1.09606	16.4447	11.4643	9.31204
4933415A04Rik	54.9915	0.0908336	1.06499	0.270416	0.335904	0.736944	0.873566	39.2355	70.9202	39.3515	62.9617	62.4754	69.8899	42.3297	52.7682
4933417C20Rik	17.2878	0.0129973	1.00905	0.379389	0.0342586	0.972671	0.988087	21.1268	17.4872	16.569	13.6873	16.4409	19.5281	15.8736	17.5894
4933417D19Rik	1.82157	-1.99229	0.251339	1.34688	-1.47919	0.139089	NA	1.00604	2.91453	4.14226	3.64995	1.09606	0	1.76374	0
4933421A08Rik	4.28517	-1.28063	0.411616	0.851619	-1.50376	0.132644	NA	2.01208	2.91453	9.32009	10.0374	2.19212	2.05559	2.6456	3.10401
4933421O10Rik	106.766	0.127578	1.09246	0.207366	0.615231	0.538402	0.747044	112.676	66.0626	126.339	103.111	111.798	102.779	97.8873	133.473
4933422A05Rik	3.85506	1.57124	2.9716	1.07385	1.46319	0.143417	NA	2.01208	0.971509	1.03557	3.64995	8.76848	12.3335	0	2.06934
4933425D22Rik	11.745	-1.13079	0.456667	0.507511	-2.2281	0.0258737	0.118714	17.1027	20.4017	10.3557	16.4248	10.9606	4.11117	5.29121	9.31204
4933427D14Rik	523.605	0.18742	1.13873	0.094111	1.99148	0.0464284	0.175677	497.989	482.84	471.182	506.431	496.515	615.648	538.821	579.416
4933428G20Rik	5.4363	0.955919	1.93981	0.792789	1.20577	0.227908	NA	1.00604	5.82906	5.17783	2.73747	15.3448	3.08338	6.17308	4.13868
4933429H19Rik	1.72101	-0.270068	0.829281	1.80784	-0.149387	0.881249	NA	0	4.85755	0	2.73747	0	0	6.17308	0
4933430H06Rik	70.1677	-0.260137	0.835009	0.221366	-1.17515	0.239936	0.483921	75.4529	66.0626	103.557	61.1367	63.5715	57.5564	62.6126	71.3923
4933430I17Rik	16.8143	-0.292951	0.816231	0.44703	-0.655329	0.512256	0.729501	30.1812	14.5726	14.4979	14.5998	21.9212	12.3335	8.81868	17.5894
4933430M04Rik	2.53338	0.968187	1.95638	1.14093	0.848597	0.396106	NA	0	4.85755	1.03557	0.912488	3.28818	3.08338	0.881868	6.20802
4933431E20Rik	175.384	0.129549	1.09395	0.146444	0.884632	0.376355	0.621434	165.996	171.957	161.548	169.723	186.33	180.892	147.272	219.35
4933431G14Rik	1.39212	-3.91806	0.0661526	2.08336	-1.88064	0.0600209	NA	2.01208	0	0	9.12488	0	0	0	0
4933431K14Rik	21.5702	-0.276742	0.825453	0.378742	-0.730688	0.46497	0.693444	34.2053	23.3162	18.6402	18.2498	26.3054	13.3613	16.7555	21.7281
4933432I09Rik	5.58668	0.0150202	1.01047	0.975201	0.0154022	0.987711	NA	11.0664	2.91453	8.28452	0	8.76848	9.25013	4.40934	0
4933433G15Rik	7.72534	1.69141	3.22972	0.649714	2.60331	0.00923277	NA	4.02416	1.94302	3.1067	5.47493	14.2488	5.13896	12.3462	15.5201
4933433G19Rik	7.6681	3.52281	11.494	0.85432	4.12353	3.73115e-05	NA	2.01208	2.91453	0	0	9.86454	13.3613	11.4643	21.7281
4933434E20Rik	519.6	-0.0867634	0.941633	0.109853	-0.789815	0.429636	0.664926	533.201	523.644	498.107	586.73	487.747	510.813	588.206	428.354
4933437G19Rik	4.93324	-0.594624	0.662217	0.792667	-0.750156	0.453161	NA	4.02416	2.91453	3.1067	13.6873	2.19212	4.11117	5.29121	4.13868
4933439C10Rik	163.112	-0.353893	0.78247	0.168341	-2.10224	0.0355326	0.147712	220.323	215.675	151.193	145.086	134.815	145.947	142.863	148.993
4933439K11Rik	13.8335	0.243729	1.18405	0.455246	0.53538	0.592387	0.784067	16.0966	9.71509	17.6046	7.29991	17.537	13.3613	11.4643	17.5894
4933439N14Rik	3.91753	1.32857	2.51154	0.902308	1.47242	0.140908	NA	4.02416	1.94302	3.1067	0	3.28818	5.13896	9.70055	4.13868
4933440N22Rik	12.8881	-0.355694	0.781494	0.480769	-0.739843	0.459395	0.68897	12.0725	14.5726	10.3557	20.9872	6.57636	14.3891	15.8736	8.27737
5031415H12Rik	1.95523	1.19144	2.28381	1.27765	0.93253	0.351063	NA	1.00604	0.971509	0	2.73747	3.28818	4.11117	3.52747	0
5031425E22Rik	666.513	-0.0651383	0.955854	0.105803	-0.615658	0.53812	0.746725	815.898	617.88	642.05	650.604	612.698	720.483	627.89	644.6
5031434O11Rik	24.5953	-0.659136	0.633258	0.374719	-1.75901	0.0785754	0.246611	36.2174	18.4587	40.387	25.5497	19.7291	11.3057	20.283	24.8321
5031439G07Rik	1091.2	0.0529795	1.03741	0.0998496	0.530593	0.595701	0.786366	990.949	1021.06	1307.92	965.413	1150.86	1125.43	1090.87	1077.09
5033403F01Rik	1.90022	-1.97882	0.253698	1.46212	-1.35339	0.175931	NA	2.01208	3.88604	6.21339	0	0	2.05559	0	1.03467
5033417F24Rik	14.7048	-0.36248	0.777827	0.499607	-0.72553	0.468127	0.695936	7.04227	15.5441	31.067	12.7748	9.86454	13.3613	17.6374	10.3467
5033430I15Rik	6.96468	-0.347941	0.785705	0.879262	-0.395719	0.692313	NA	0	9.71509	19.6757	1.82498	10.9606	4.11117	5.29121	4.13868
5330409N07Rik	76.3119	-0.411765	0.751703	0.254427	-1.6184	0.105576	0.296547	89.5375	76.7492	109.77	72.0866	75.6282	91.4736	41.4478	53.8029
5330413P13Rik	2.69576	-0.0283469	0.980543	1.11461	-0.025432	0.97971	NA	1.00604	0	7.24896	2.73747	2.19212	2.05559	5.29121	1.03467
5330416C01Rik	20.2099	-1.75378	0.296524	0.416499	-4.21076	2.54512e-05	0.000702177	31.1872	25.2592	46.6004	21.8997	8.76848	8.22234	11.4643	8.27737
5330417C22Rik	40.286	-0.66799	0.629383	0.397008	-1.68256	0.0924607	0.273488	36.2174	34.9743	89.0586	37.412	55.8991	22.6114	26.456	19.6587
5330431K02Rik	279.106	0.0761567	1.05421	0.138339	0.550507	0.581972	0.777136	278.673	285.624	267.176	254.584	290.456	336.088	216.058	304.193
5330434G04Rik	366.495	-0.0532892	0.963737	0.0973903	-0.547171	0.584261	0.778378	366.198	375.974	348.985	401.495	367.18	365.894	366.857	339.372
5330437M03Rik	7.88456	-0.506215	0.704067	0.625887	-0.808795	0.418633	NA	11.0664	2.91453	9.32009	13.6873	7.67242	3.08338	7.05494	8.27737
5330438D12Rik	23.4913	-0.137597	0.909032	0.364828	-0.377155	0.706058	0.854718	32.1933	15.5441	25.8891	24.6372	24.1133	20.5559	14.9918	30.0055
5330438I03Rik	1.69223	-1.27079	0.414432	1.4996	-0.847422	0.39676	NA	1.00604	5.82906	0	2.73747	0	3.08338	0.881868	0
5330439K02Rik	22.5264	-0.0493479	0.966373	0.349246	-0.141298	0.887634	0.950619	24.1449	27.2023	17.6046	22.8122	14.2488	23.6392	24.6923	25.8668
5430400D12Rik	7.81621	0.306028	1.2363	0.670708	0.456276	0.648192	NA	3.01812	6.80057	5.17783	12.7748	17.537	4.11117	7.93681	5.17335
5430402O13Rik	7.79103	-1.24021	0.423311	0.682103	-1.81821	0.0690314	NA	8.04831	8.74358	18.6402	8.2124	9.86454	5.13896	2.6456	1.03467
5430403G16Rik	25.6422	0.447827	1.36398	0.456947	0.980042	0.327065	0.57552	21.1268	28.1738	12.4268	24.6372	49.3227	39.0561	9.70055	20.6934
5430405H02Rik	91.8857	-0.372973	0.77219	0.196985	-1.89341	0.0583037	0.203863	119.719	100.065	98.3787	96.7238	59.1872	96.6125	72.3132	92.0857
5430414B19Rik	10.5434	-0.234641	0.849897	0.529905	-0.442798	0.657912	0.826164	11.0664	15.5441	6.21339	12.7748	13.1527	7.19455	13.228	5.17335
5430416N02Rik	563.79	-0.117294	0.921915	0.105151	-1.11548	0.264645	0.511889	588.533	597.478	488.787	670.679	555.703	569.397	514.129	525.613
5430420F09Rik	98.7417	0.249916	1.18914	0.199122	1.25509	0.209445	0.444606	102.616	95.2079	75.5963	86.6864	127.143	117.168	75.8406	109.675
5430430B14Rik	3.30192	0.499346	1.41357	1.07718	0.46357	0.642956	NA	7.04227	3.88604	0	0	5.4803	5.13896	1.76374	3.10401
5430434F05Rik	182.642	0.16769	1.12326	0.135916	1.23378	0.217285	0.454544	207.244	162.242	156.37	162.423	195.099	194.253	193.129	190.379
5530400K19Rik	3.58682	-0.0929754	0.937587	1.11292	-0.083542	0.933421	NA	1.00604	4.85755	5.17783	3.64995	9.86454	0	0	4.13868
5530402G07Rik	1.8573	-1.97344	0.254645	1.33939	-1.47338	0.140648	NA	7.04227	1.94302	1.03557	1.82498	1.09606	0	0.881868	1.03467
5530601H04Rik	221.002	-0.450473	0.731803	0.151407	-2.97525	0.00292749	0.02532	310.866	273.966	228.86	208.047	158.929	188.086	203.711	195.553
5730405O15Rik	23.3376	-0.0589973	0.959931	0.400381	-0.147353	0.882853	0.949245	28.1691	8.74358	32.1025	26.4622	21.9212	22.6114	29.1016	17.5894
5730408A14Rik	7.38345	1.12007	2.17357	0.650297	1.72239	0.0849984	NA	3.01812	1.94302	8.28452	5.47493	5.4803	13.3613	13.228	8.27737
5730409E04Rik	41.7177	0.121816	1.0881	0.300616	0.40522	0.685316	0.842623	41.2476	42.7464	49.7071	26.4622	51.5148	25.6948	52.9121	43.4562
5730414N17Rik	5.79842	0.0357202	1.02507	0.856419	0.0417087	0.966731	NA	16.0966	0.971509	3.1067	2.73747	3.28818	7.19455	2.6456	10.3467
5730420D15Rik	2.56427	-0.658009	0.633752	1.0726	-0.613473	0.539563	NA	1.00604	5.82906	2.07113	3.64995	0	2.05559	1.76374	4.13868
5730455P16Rik	305.471	-0.123474	0.917975	0.138087	-0.894173	0.371229	0.61702	296.782	373.06	264.069	340.358	301.417	245.642	336.874	285.569
5730480H06Rik	254.268	0.14745	1.10761	0.117417	1.25578	0.209196	0.444543	262.576	251.621	218.504	231.772	291.552	271.337	246.041	260.737
5730507A11Rik	103.664	0.198171	1.14724	0.199988	0.990915	0.321727	0.570699	118.713	94.2364	83.8808	89.4239	86.5888	144.919	98.7692	112.779
5730507C01Rik	7.14317	0.108649	1.07822	0.711109	0.152789	0.878565	NA	1.00604	3.88604	14.4979	8.2124	4.38424	9.25013	9.70055	6.20802
5730521K06Rik	13.4225	0.00838142	1.00583	0.469806	0.0178402	0.985766	0.994134	14.0845	21.3732	6.21339	11.8623	12.0567	15.4169	14.9918	11.3814
5730522E02Rik	141.153	-0.675091	0.626293	0.202765	-3.32942	0.000870271	0.0105998	135.815	139.897	249.571	169.723	103.03	99.6959	126.989	104.502
5830408C22Rik	1.56169	1.12942	2.18771	1.56615	0.721147	0.470819	NA	1.00604	1.94302	0	0.912488	6.57636	2.05559	0	0
5830417I10Rik	552.986	0.104044	1.07478	0.131109	0.793574	0.427443	0.663125	591.551	570.276	390.408	579.43	521.725	563.23	556.459	650.808
5830418P13Rik	2.26146	1.43066	2.69569	1.11482	1.28331	0.199385	NA	2.01208	1.94302	0	0.912488	4.38424	2.05559	2.6456	4.13868
5830444F18Rik	39.7232	0.485053	1.39964	0.29601	1.63863	0.101289	0.289641	29.1751	38.8604	43.4937	20.9872	42.7463	53.4452	35.2747	53.8029
5830448L01Rik	15.7699	-0.0612555	0.95843	0.416945	-0.146915	0.883199	0.949336	18.1087	16.5157	13.4623	16.4248	9.86454	22.6114	16.7555	12.416
5830454E08Rik	10.9627	0.084245	1.06013	0.585622	0.143856	0.885614	0.94973	19.1147	9.71509	10.3557	3.64995	6.57636	6.16676	17.6374	14.4854
5830462O15Rik	42.2619	0.106769	1.07681	0.296182	0.360483	0.718486	0.862208	40.2416	50.5185	31.067	41.062	28.4976	35.9727	47.6209	63.1149
5830487J09Rik	102.856	-0.346843	0.786303	0.181281	-1.91328	0.0557117	0.197879	126.761	97.1509	105.628	131.398	74.5321	87.3624	99.6511	100.363
5930403N24Rik	47.4473	-0.23606	0.849061	0.286269	-0.824606	0.409595	0.64889	54.3261	44.6894	64.205	41.9745	46.0345	29.806	34.3928	64.1496
5930409G06Rik	24.1985	-0.81617	0.567948	0.356681	-2.28824	0.0221236	0.106524	32.1933	27.2023	33.1381	31.0246	8.76848	20.5559	15.8736	24.8321
5930412G12Rik	14.5394	0.065271	1.04628	0.465515	0.140212	0.888492	0.950619	15.0906	5.82906	19.6757	16.4248	14.2488	10.2779	20.283	14.4854
5930420M18Rik	79.9618	-0.0603114	0.959057	0.205466	-0.293535	0.769114	0.889411	77.465	71.8917	96.3076	81.2115	56.9951	93.5291	78.4862	83.8083
5930422O12Rik	19.6829	0.761111	1.6948	0.412106	1.84688	0.0647641	0.218696	13.0785	19.4302	19.6757	6.38742	21.9212	32.8894	20.283	23.7974
5930430L01Rik	49.5335	-0.355438	0.781632	0.272403	-1.30482	0.191953	0.421593	61.3684	54.4045	50.7427	55.6618	33.9779	41.1117	31.7472	67.2536
5930435M05Rik	4.47309	-0.96975	0.510595	0.802346	-1.20864	0.2268	NA	10.0604	3.88604	5.17783	4.56244	5.4803	2.05559	3.52747	1.03467
6030400A10Rik	15.8815	0.244897	1.18501	0.425504	0.575546	0.564922	0.764545	17.1027	9.71509	17.6046	13.6873	19.7291	11.3057	14.1099	23.7974
6030407O03Rik	2.31085	-1.76615	0.293993	1.45455	-1.21422	0.224664	NA	9.05435	0	5.17783	0	2.19212	1.02779	0	1.03467
6030408B16Rik	1.86473	3.5541	11.746	1.44532	2.45903	0.0139311	NA	0	0.971509	0	0	4.38424	3.08338	4.40934	2.06934
6030442K20Rik	55.4515	-0.170017	0.888832	0.229254	-0.741609	0.458324	0.68816	73.4409	50.5185	56.9561	53.8368	61.3794	52.4174	48.5027	46.5602
6030443J06Rik	33.473	-1.05049	0.482804	0.318282	-3.3005	0.000965116	0.0114281	53.3201	45.6609	42.4582	39.237	27.4015	24.667	24.6923	10.3467
6030445D17Rik	1.34121	-1.39367	0.380596	1.7366	-0.802528	0.422247	NA	0	0	4.14226	3.64995	0	2.05559	0.881868	0
6030458C11Rik	365.481	-0.114941	0.92342	0.10097	-1.13837	0.254968	0.50134	376.259	370.145	412.155	362.258	335.394	382.339	356.275	329.025
6030460B20Rik	12.2947	0.392793	1.31293	0.534436	0.734967	0.46236	0.691877	17.1027	13.6011	7.24896	4.56244	23.0173	9.25013	13.228	10.3467
6230400D17Rik	36.0402	0.266717	1.20307	0.300955	0.886236	0.37549	0.620696	35.2114	26.2308	37.2803	31.9371	59.1872	32.8894	33.511	32.0748
6330403K07Rik	730.997	-0.0402547	0.972483	0.115303	-0.34912	0.726999	0.868166	635.817	690.743	938.222	700.791	705.863	693.76	739.887	742.894
6330403L08Rik	32.6833	-0.382264	0.767233	0.35499	-1.07683	0.281557	0.531609	25.151	25.2592	60.0628	37.412	25.2094	29.806	20.283	38.2828
6330403N20Rik	3.21788	-1.43464	0.369939	1.20738	-1.18822	0.234745	NA	9.05435	8.74358	1.03557	0	0	4.11117	1.76374	1.03467
6330408M09Rik	24.144	-0.541743	0.686941	0.353144	-1.53405	0.125016	0.327388	24.1449	31.0883	28.9958	30.1121	26.3054	23.6392	18.5192	10.3467
6330409D20Rik	5.98324	0.280908	1.21496	0.73434	0.382532	0.702067	NA	6.03624	9.71509	3.1067	2.73747	6.57636	12.3335	5.29121	2.06934
6330415B21Rik	188.009	-0.128156	0.915	0.19354	-0.662167	0.507864	0.726209	220.323	209.846	189.508	165.16	202.771	243.587	126.989	145.889
6330418K02Rik	77.2418	-0.467535	0.723199	0.208555	-2.24179	0.0249751	0.115522	100.604	100.065	92.1653	65.6992	73.436	57.5564	59.0852	69.3229
6330419E04Rik	4.06696	-0.137349	0.909188	0.84781	-0.162004	0.871302	NA	5.0302	2.91453	7.24896	1.82498	3.28818	5.13896	0.881868	6.20802
6330537M06Rik	2.54384	1.66075	3.16181	1.16754	1.42243	0.154901	NA	3.01812	0	0	1.82498	5.4803	2.05559	1.76374	6.20802
6330549D23Rik	23.2344	-0.128609	0.914713	0.402919	-0.319194	0.749579	0.879686	25.151	37.8889	18.6402	15.5123	21.9212	29.806	25.5742	11.3814
6330562C20Rik	7.45301	0.254662	1.19306	0.583726	0.43627	0.662641	NA	5.0302	6.80057	7.24896	8.2124	6.57636	6.16676	12.3462	7.2427
6330576A10Rik	1.82859	-3.47417	0.0899849	1.48757	-2.33547	0.0195188	NA	3.01812	5.82906	1.03557	3.64995	1.09606	0	0	0
6430511E19Rik	123.918	0.490032	1.40448	0.172119	2.84705	0.00441268	0.0341975	103.622	107.838	104.592	95.8113	143.584	146.974	111.997	176.929
6430531B16Rik	2.57739	0.410546	1.32919	1.05966	0.387433	0.698436	NA	5.0302	0	2.07113	1.82498	1.09606	3.08338	4.40934	3.10401
6430548M08Rik	220.7	-0.379247	0.768839	0.213899	-1.77302	0.0762257	0.241912	214.286	175.843	386.266	222.647	175.37	161.363	236.341	193.483
6430550D23Rik	14.7904	-0.154166	0.898652	0.479388	-0.321589	0.747764	0.878596	25.151	15.5441	14.4979	7.29991	7.67242	14.3891	14.1099	19.6587
6430562O15Rik	4.26764	1.10735	2.1545	1.08735	1.0184	0.30849	NA	7.04227	0.971509	0	2.73747	12.0567	7.19455	0	4.13868
6430571L13Rik	18.7607	0.103625	1.07447	0.382839	0.270675	0.786641	0.89894	17.1027	20.4017	17.6046	17.3373	23.0173	11.3057	24.6923	18.6241
6430573P05Rik	5.71819	0.0316899	1.02221	0.710833	0.0445814	0.964441	NA	2.01208	5.82906	9.32009	5.47493	7.67242	7.19455	6.17308	2.06934
6430590A07Rik	154.461	-0.135817	0.910154	0.169289	-0.802281	0.42239	0.659195	157.948	140.869	211.255	136.873	158.929	159.308	128.753	141.75
6430710M23Rik	8.48753	-0.259764	0.835225	0.71214	-0.364765	0.715287	NA	6.03624	4.85755	5.17783	20.9872	4.38424	10.2779	14.1099	2.06934
6530401F13Rik	1.87265	0.224318	1.16822	1.32761	0.168964	0.865825	NA	5.0302	0.971509	0	0.912488	2.19212	4.11117	1.76374	0
6530402F18Rik	300.816	-0.670931	0.628101	0.177862	-3.7722	0.000161817	0.00296494	391.349	312.826	489.822	285.609	184.138	234.337	290.135	218.316
6530403H02Rik	13.0127	-0.185597	0.879285	0.474522	-0.391125	0.695705	0.849696	13.0785	14.5726	20.7113	7.29991	9.86454	9.25013	15.8736	13.4507
6530409C15Rik	3.82141	-0.736192	0.600322	0.994746	-0.740081	0.459251	NA	9.05435	1.94302	6.21339	1.82498	5.4803	0	0.881868	5.17335
6530413G14Rik	4.48597	-0.201019	0.869936	0.954926	-0.210507	0.833272	NA	11.0664	2.91453	5.17783	0	6.57636	6.16676	0.881868	3.10401
6530437J22Rik	16.1358	-1.00755	0.49739	0.44887	-2.24464	0.0247913	0.114841	26.157	12.6296	28.9958	18.2498	13.1527	10.2779	6.17308	13.4507
6720427I07Rik	390.034	0.224834	1.16864	0.124072	1.81212	0.0699674	0.229508	410.464	382.775	285.816	359.52	461.441	386.45	442.698	391.106
6720464F23Rik	39.435	0.408489	1.32729	0.294241	1.38828	0.165052	0.386321	31.1872	28.1738	30.0314	45.6244	63.5715	41.1117	34.3928	41.3868
6720469O03Rik	18.7722	-0.745937	0.59628	0.378214	-1.97226	0.0485794	0.181218	18.1087	23.3162	28.9958	23.7247	14.2488	16.4447	14.9918	10.3467
6720475M21Rik	20.0966	-0.282894	0.821941	0.376499	-0.75138	0.452424	0.683826	15.0906	32.0598	22.7824	18.2498	17.537	20.5559	15.8736	18.6241
6720482G16Rik	8.15846	0.732033	1.66098	0.60676	1.20646	0.227639	NA	9.05435	2.91453	5.17783	7.29991	10.9606	16.4447	6.17308	7.2427
6720483E21Rik	2.28205	-1.16649	0.445503	1.18184	-0.987011	0.323637	NA	3.01812	2.91453	4.14226	2.73747	0	0	4.40934	1.03467
6720489N17Rik	98.5069	0.273091	1.20839	0.205966	1.3259	0.184871	0.412874	111.67	87.4358	82.8452	74.824	90.973	119.224	85.5412	135.542
6820402A03Rik	97.0271	0.211127	1.15759	0.221304	0.954014	0.340076	0.588476	110.664	79.6638	105.628	63.8742	96.4533	122.307	77.6044	120.022
6820408C15Rik	14.1146	0.639947	1.55827	0.545101	1.174	0.240397	0.484501	13.0785	2.91453	16.569	11.8623	10.9606	12.3335	31.7472	13.4507
6820431F20Rik	177.997	0.11704	1.08451	0.17838	0.656124	0.511745	0.729203	201.208	178.758	110.805	191.623	209.347	169.586	170.201	192.449
7120432I05Rik	19.2973	-0.018486	0.987268	0.395487	-0.0467424	0.962719	0.983966	18.1087	18.4587	15.5335	25.5497	25.2094	11.3057	24.6923	15.5201
7530416G11Rik	3.54336	-0.354247	0.782278	0.914187	-0.387499	0.698387	NA	2.01208	4.85755	6.21339	2.73747	7.67242	2.05559	1.76374	1.03467
8030442B05Rik	1.4171	0.809178	1.75221	2.17626	0.371821	0.710026	NA	0	0	4.14226	0	0	7.19455	0	0
8030445P17Rik	121.929	-0.457734	0.728129	0.175354	-2.61034	0.00904529	0.0571715	151.912	111.724	161.548	139.611	88.7809	123.335	102.297	96.2244
8030462N17Rik	402.669	-0.11127	0.925773	0.095422	-1.16609	0.24358	0.487999	385.313	443.008	437.008	407.882	367.18	401.867	394.195	384.898
8030487O14Rik	7.69012	0.559577	1.47384	0.800312	0.699199	0.484428	NA	0	1.94302	16.569	6.38742	8.76848	7.19455	6.17308	14.4854
8430406P12Rik	32.0534	0.555334	1.46951	0.350327	1.58519	0.112924	0.308418	13.0785	30.1168	35.2092	25.5497	47.1306	32.8894	47.6209	24.8321
8430422M14Rik	11.7513	-0.639707	0.641843	0.489462	-1.30696	0.191226	0.420549	16.0966	13.6011	15.5335	11.8623	12.0567	13.3613	5.29121	6.20802
8430429K09Rik	98.4778	-0.0814174	0.945129	0.178429	-0.456302	0.648173	0.820412	100.604	116.581	89.0586	98.5487	111.798	94.5569	97.0055	79.6696
8430432A02Rik	7.11486	0.613563	1.53003	0.801821	0.765212	0.444145	NA	0	7.77207	9.32009	5.47493	1.09606	13.3613	10.5824	9.31204
9030025P20Rik	10.9856	-0.392868	0.761614	0.514869	-0.763044	0.445437	0.678279	11.0664	14.5726	12.4268	11.8623	7.67242	16.4447	9.70055	4.13868
9030407P20Rik	38.0434	-0.331835	0.794525	0.299894	-1.10651	0.268506	0.516218	42.2536	26.2308	61.0983	40.1495	38.3621	32.8894	34.3928	28.9708
9030612E09Rik	7.97681	1.08037	2.11457	0.594243	1.81806	0.0690557	NA	5.0302	2.91453	5.17783	7.29991	8.76848	9.25013	8.81868	16.5547
9030624G23Rik	28.1695	0.386354	1.30709	0.368289	1.04905	0.294155	0.54406	39.2355	22.3447	19.6757	16.4248	28.4976	47.2785	22.9286	28.9708
9130002K18Rik	21.8321	0.289217	1.22198	0.369382	0.782974	0.433642	0.66847	25.151	18.4587	15.5335	19.1623	32.8818	22.6114	14.9918	25.8668
9130008F23Rik	5.58051	-1.256	0.418702	0.765498	-1.64077	0.100846	NA	3.01812	9.71509	11.3912	7.29991	2.19212	7.19455	1.76374	2.06934
9130017K11Rik	2.90692	0.0327925	1.02299	1.03394	0.0317162	0.974698	NA	0	0.971509	4.14226	6.38742	2.19212	3.08338	4.40934	2.06934
9130019O22Rik	76.2855	-0.444619	0.734778	0.21887	-2.03143	0.042211	0.16517	103.622	77.7207	70.4184	100.374	60.2833	50.3618	80.25	67.2536
9130019P16Rik	5.23782	-1.11492	0.461717	0.773929	-1.44059	0.149699	NA	8.04831	8.74358	7.24896	4.56244	5.4803	0	2.6456	5.17335
9130023H24Rik	75.7937	-0.761998	0.589679	0.202622	-3.76068	0.000169454	0.00307149	90.5435	78.6923	108.734	103.111	61.3794	51.3896	49.3846	63.1149
9130024F11Rik	53.9987	-1.48585	0.357038	0.385137	-3.85798	0.000114329	0.00233322	58.3503	44.6894	157.406	58.3993	16.4409	28.7782	37.9203	30.0055
9130213A22Rik	2.46953	0.655171	1.5748	1.08993	0.601111	0.547766	NA	2.01208	1.94302	0	3.64995	1.09606	3.08338	1.76374	6.20802
9130221H12Rik	82.4069	-0.0128044	0.991164	0.192149	-0.0666379	0.94687	0.976291	70.4227	92.2934	73.5251	94.8988	71.2439	81.1956	90.8324	84.843
9130230L23Rik	2.60441	1.08014	2.11425	1.1197	0.964672	0.334709	NA	1.00604	0	1.03557	4.56244	4.38424	6.16676	2.6456	1.03467
9130401M01Rik	117.101	0.366019	1.28879	0.186394	1.96368	0.0495672	0.183371	109.658	100.065	83.8808	114.974	172.081	108.946	119.934	127.265
9130410C08Rik	2.77931	1.46569	2.76195	1.15165	1.27269	0.203129	NA	0	2.91453	2.07113	0.912488	9.86454	1.02779	4.40934	1.03467
9130604C24Rik	4.51308	-1.3951	0.380219	0.814834	-1.71213	0.0868732	NA	3.01812	10.6866	5.17783	7.29991	1.09606	4.11117	2.6456	2.06934
9230104M06Rik	3.1533	-0.304949	0.809471	0.960403	-0.317522	0.750848	NA	7.04227	3.88604	2.07113	0.912488	4.38424	1.02779	1.76374	4.13868
9230105E05Rik	3.31686	0.295075	1.22695	0.95592	0.308681	0.757564	NA	5.0302	2.91453	2.07113	1.82498	6.57636	1.02779	0.881868	6.20802
9230111E07Rik	6.46876	0.445751	1.36202	0.82348	0.541301	0.5883	NA	0	7.77207	2.07113	11.8623	9.86454	8.22234	2.6456	9.31204
9230112J17Rik	4.28769	2.26131	4.79427	0.932506	2.42498	0.015309	NA	2.01208	1.94302	2.07113	0	7.67242	3.08338	12.3462	5.17335
9230114K14Rik	19.5152	-0.340236	0.789912	0.387131	-0.878866	0.379474	0.623834	20.1208	19.4302	16.569	31.0246	13.1527	14.3891	17.6374	23.7974
9230116L04Rik	6.2728	-0.319069	0.801587	0.787522	-0.405155	0.685363	NA	8.04831	11.6581	7.24896	0.912488	4.38424	12.3335	3.52747	2.06934
9230116N13Rik	7.29066	-0.32841	0.796413	0.693062	-0.473854	0.635604	NA	11.0664	0.971509	11.3912	9.12488	5.4803	9.25013	7.93681	3.10401
9330020H09Rik	50.0217	-0.225412	0.855351	0.232772	-0.96838	0.332854	0.581089	58.3503	51.49	47.636	58.3993	47.1306	42.1395	54.6758	40.3522
9330102E08Rik	19.9805	0.628898	1.54638	0.407951	1.5416	0.123171	0.324757	14.0845	27.2023	12.4268	9.12488	24.1133	18.5003	26.456	27.9361
9330104G04Rik	33.5975	-1.09696	0.467502	0.337789	-3.24746	0.00116438	0.0130523	48.2899	54.4045	55.9205	24.6372	17.537	28.7782	18.5192	20.6934
9330111N05Rik	1.32592	-1.41059	0.376157	1.65514	-0.852252	0.394074	NA	1.00604	5.82906	0	0.912488	1.09606	0	1.76374	0
9330121J05Rik	2.02334	-0.377001	0.770037	1.27755	-0.295097	0.76792	NA	4.02416	0	5.17783	0	1.09606	2.05559	1.76374	2.06934
9330121K16Rik	23.1886	-1.0035	0.498787	0.489352	-2.05068	0.0402984	0.160315	40.2416	17.4872	44.5293	21.8997	19.7291	7.19455	28.2198	6.20802
9330136K24Rik	5.2502	0.0249367	1.01744	0.766331	0.0325404	0.974041	NA	9.05435	1.94302	6.21339	3.64995	4.38424	10.2779	4.40934	2.06934
9330151L19Rik	106.006	0.171561	1.12628	0.211787	0.810063	0.417904	0.655373	96.5798	92.2934	70.4184	138.698	127.143	124.363	96.1236	102.432
9330154J02Rik	17.4656	-0.599299	0.660075	0.449877	-1.33214	0.182814	0.409855	23.1389	15.5441	14.4979	31.0246	12.0567	6.16676	17.6374	19.6587
9330159F19Rik	534.872	-0.267783	0.830595	0.141502	-1.89244	0.0584324	0.204017	549.297	496.441	787.029	505.519	455.961	541.647	486.791	456.29
9330159M07Rik	46.9955	0.515638	1.42963	0.292168	1.76487	0.0775862	0.24466	49.2959	22.3447	28.9958	53.8368	54.803	51.3896	51.1483	64.1496
9330160F10Rik	12.3318	0.327137	1.25452	0.500426	0.653716	0.513295	0.730136	14.0845	8.74358	5.17783	15.5123	20.8251	10.2779	10.5824	13.4507
9330161L09Rik	12.5028	-1.40263	0.378238	0.525115	-2.6711	0.00756035	0.0503138	12.0725	29.1453	16.569	14.5998	8.76848	4.11117	4.40934	10.3467
9330162012Rik	1.85556	1.01705	2.02378	1.27821	0.795685	0.426215	NA	0	0	3.1067	1.82498	3.28818	1.02779	3.52747	2.06934
9330162G02Rik	146.687	-0.646965	0.638622	0.172845	-3.74303	0.000181817	0.00323641	162.978	158.356	234.038	160.598	129.335	104.835	102.297	121.056
9330171B17Rik	1.75818	0.939641	1.91805	1.47038	0.639047	0.522792	NA	1.00604	1.94302	0	1.82498	0	3.08338	0	6.20802
9330179D12Rik	1.77381	4.29533	19.6346	1.49126	2.88034	0.00397244	NA	0	0	0	0	3.28818	3.08338	2.6456	5.17335
9330182L06Rik	84.1278	0.309902	1.23962	0.1987	1.55965	0.118843	0.318111	91.5496	61.2051	69.3829	78.474	99.7415	97.6403	100.533	74.4963
9330198I05Rik	1.55969	-0.599785	0.659852	1.51173	-0.396755	0.691548	NA	2.01208	0	0	5.47493	2.19212	0	1.76374	1.03467
9430002A10Rik	6.11403	-0.521593	0.696602	0.791868	-0.658687	0.510097	NA	7.04227	9.71509	1.03557	10.9499	9.86454	1.02779	6.17308	3.10401
9430015G10Rik	494.147	-0.156036	0.897487	0.124443	-1.25388	0.209887	0.445431	543.261	579.02	387.301	573.043	491.035	463.535	470.036	445.943
9430021M05Rik	1.76234	0.978189	1.96999	1.35995	0.719281	0.471968	NA	1.00604	1.94302	0	1.82498	1.09606	2.05559	6.17308	0
9430024E24Rik	1.63203	-0.649097	0.637679	1.2765	-0.508498	0.611104	NA	2.01208	1.94302	3.1067	0.912488	1.09606	0	0.881868	3.10401
9430025C20Rik	10.3993	0.487261	1.40178	0.573332	0.849877	0.395394	0.637204	12.0725	4.85755	12.4268	5.47493	16.4409	7.19455	18.5192	6.20802
9430031K09Rik	20.5359	-0.0698954	0.952707	0.39788	-0.17567	0.860554	0.937389	23.1389	21.3732	16.569	22.8122	32.8818	19.5281	17.6374	10.3467
9430034N14Rik	69.6749	-0.38093	0.767942	0.253047	-1.50537	0.132228	0.338435	109.658	68.9772	66.2762	70.2616	56.9951	86.3346	50.2665	48.6295
9430037G07Rik	30.0894	-0.0803738	0.945813	0.308675	-0.260383	0.794568	0.902928	35.2114	23.3162	25.8891	39.237	30.6897	31.8616	31.7472	22.7628
9430037O13Rik	16.3403	0.141773	1.10326	0.494609	0.286638	0.77439	0.892635	23.1389	18.4587	4.14226	16.4248	8.76848	17.4725	18.5192	23.7974
9430038I01Rik	51.7618	0.1755	1.12936	0.26947	0.651279	0.514867	0.731057	59.3563	45.6609	30.0314	59.3117	60.2833	40.0839	63.4945	55.8722
9430041J12Rik	78.8986	-0.0951888	0.93615	0.205492	-0.463224	0.643204	0.817143	77.465	90.3504	73.5251	83.9489	81.1085	90.4458	54.6758	79.6696
9430053O09Rik	48.1105	0.789725	1.72874	0.361317	2.18569	0.0288385	0.127862	21.1268	29.1453	69.3829	21.8997	53.7069	45.2229	80.25	64.1496
9430060I03Rik	12.4649	-0.391063	0.762568	0.504202	-0.775607	0.437981	0.672253	10.0604	12.6296	18.6402	15.5123	3.28818	12.3335	15.8736	11.3814
9430062P05Rik	21.9309	0.424973	1.34255	0.417143	1.01877	0.308311	0.558119	28.1691	14.5726	9.32009	22.8122	32.8818	17.4725	32.6291	17.5894
9430064I24Rik	23.2323	-0.660981	0.632448	0.372422	-1.77482	0.0759279	0.241448	38.2295	24.2877	28.9958	22.8122	12.0567	13.3613	26.456	19.6587
9430065F17Rik	2.96219	0.298128	1.22955	1.05639	0.282213	0.77778	NA	4.02416	0.971509	1.03557	4.56244	0	6.16676	1.76374	5.17335
9430068D22Rik	23.0022	0.628306	1.54575	0.337313	1.86268	0.0625071	0.213685	18.1087	23.3162	14.4979	16.4248	26.3054	27.7504	31.7472	25.8668
9430078K24Rik	3.25732	1.78946	3.45685	1.03195	1.73405	0.0829085	NA	1.00604	3.88604	0	0.912488	8.76848	2.05559	5.29121	4.13868
9430081H08Rik	15.7113	-0.343595	0.788075	0.45009	-0.763392	0.445229	0.678224	25.151	21.3732	7.24896	16.4248	12.0567	15.4169	11.4643	16.5547
9430087B13Rik	27.9213	0.162416	1.11916	0.344881	0.470932	0.637689	0.81368	29.1751	26.2308	13.4623	36.4995	26.3054	26.7226	37.0385	27.9361
9430087J23Rik	20.3267	-0.70002	0.615564	0.450799	-1.55284	0.120461	0.320487	24.1449	25.2592	35.2092	16.4248	18.633	10.2779	26.456	6.20802
9430091E24Rik	31.0228	-0.185534	0.879324	0.374668	-0.495196	0.620462	0.802889	24.1449	42.7464	16.569	48.3619	29.5936	18.5003	29.9835	38.2828
9430092D12Rik	100.614	-0.124687	0.917203	0.179311	-0.695368	0.486824	0.710203	115.695	96.1794	90.0942	117.711	81.1085	109.974	91.7143	102.432
9430097D07Rik	2.13751	-0.0994106	0.933414	1.58922	-0.0625531	0.950122	NA	4.02416	3.88604	0	0.912488	0	0	0	8.27737
9430098F02Rik	1.86394	0.676279	1.59801	1.23143	0.549181	0.582881	NA	0	0.971509	1.03557	3.64995	2.19212	4.11117	0.881868	2.06934
9430099M06Rik	6.35312	0.317298	1.24599	0.651195	0.487256	0.626077	NA	4.02416	6.80057	7.24896	4.56244	10.9606	3.08338	7.93681	6.20802
9530003O04Rik	199.844	0.46857	1.38374	0.156712	2.99001	0.00278972	0.0243912	182.093	152.527	201.935	135.048	206.059	271.337	240.75	209.003
9530013L04Rik	6.81876	-0.184073	0.880214	0.684172	-0.269045	0.787895	NA	2.01208	8.74358	8.28452	10.0374	5.4803	8.22234	9.70055	2.06934
9530018F02Rik	12.9517	0.906239	1.87415	0.487502	1.85894	0.0630351	0.21475	15.0906	4.85755	5.17783	10.9499	14.2488	15.4169	20.283	17.5894
9530022L04Rik	4.39802	-0.167394	0.89045	0.823924	-0.203167	0.839005	NA	2.01208	3.88604	8.28452	4.56244	4.38424	3.08338	7.93681	1.03467
9530026P05Rik	3.64068	-0.378186	0.769404	0.875384	-0.432023	0.665725	NA	6.03624	5.82906	1.03557	3.64995	1.09606	3.08338	5.29121	3.10401
9530027J09Rik	3.44783	-1.56946	0.336933	1.13301	-1.38522	0.165987	NA	0	10.6866	7.24896	2.73747	0	4.11117	1.76374	1.03467
9530051G07Rik	33.1749	0.129811	1.09415	0.354579	0.366098	0.714292	0.859712	49.2959	32.0598	27.9603	17.3373	39.4582	30.8338	22.9286	45.5255
9530052C20Rik	14.5673	0.196163	1.14565	0.474051	0.413803	0.679019	0.83949	11.0664	22.3447	15.5335	5.47493	17.537	16.4447	16.7555	11.3814
9530052E02Rik	4.76685	-0.487858	0.713083	0.721496	-0.676176	0.498929	NA	4.02416	4.85755	5.17783	8.2124	4.38424	3.08338	5.29121	3.10401
9530053A07Rik	4.11225	-2.47973	0.179277	0.994648	-2.49308	0.0126642	NA	3.01812	10.6866	4.14226	10.0374	0	1.02779	0.881868	3.10401
9530056E24Rik	76.974	-0.246227	0.843099	0.218347	-1.12768	0.259453	0.506849	64.3865	85.4928	101.485	83.0364	81.1085	61.6676	83.7775	54.8376
9530056K15Rik	16.013	0.560598	1.47488	0.448227	1.2507	0.211043	0.44673	15.0906	11.6581	10.3557	14.5998	20.8251	28.7782	18.5192	8.27737
9530059O14Rik	57.3842	-0.0333338	0.97716	0.261836	-0.127308	0.898696	0.955371	72.4348	46.6324	61.0983	52.0118	66.8597	71.9455	52.9121	35.1788
9530062K07Rik	6.18059	0.474291	1.38924	0.660623	0.717945	0.472791	NA	3.01812	6.80057	6.21339	4.56244	9.86454	9.25013	3.52747	6.20802
9530068E07Rik	593.404	0.198568	1.14756	0.0817394	2.42928	0.0151286	0.0817645	561.37	543.074	565.419	541.106	649.964	651.621	649.055	585.624
9530077C05Rik	55.8394	0.385094	1.30594	0.259944	1.48145	0.138488	0.346814	39.2355	62.1766	44.5293	47.4494	62.4754	88.3902	47.6209	54.8376
9530078K11Rik	7.22056	0.274695	1.20974	0.696045	0.394651	0.693101	NA	6.03624	13.6011	1.03557	5.47493	6.57636	4.11117	10.5824	10.3467
9530082P21Rik	3.03714	1.08118	2.11577	1.02993	1.04976	0.293827	NA	4.02416	2.91453	0	0.912488	4.38424	2.05559	7.93681	2.06934
9530085L11Rik	68.143	-0.264484	0.832497	0.208122	-1.27081	0.203796	0.437629	76.459	57.3191	77.6674	85.7739	64.6675	66.8065	56.4395	60.0109
9530086O07Rik	36.3677	0.109818	1.07909	0.307678	0.356925	0.721148	0.863871	40.2416	34.9743	22.7824	41.9745	43.8424	29.806	49.3846	27.9361
9530097N15Rik	12.2435	-0.279317	0.823981	0.536545	-0.520584	0.602657	0.792401	10.0604	13.6011	12.4268	17.3373	10.9606	18.5003	2.6456	12.416
9630001P10Rik	2.8973	0.127739	1.09258	1.15991	0.110129	0.912307	NA	9.05435	0	2.07113	0	2.19212	4.11117	2.6456	3.10401
9630010A21Rik	28.8891	-0.102761	0.931249	0.370104	-0.277655	0.781277	0.896528	38.2295	32.0598	13.4623	35.587	40.5542	27.7504	23.8104	19.6587
9630013D21Rik	12.1488	1.01448	2.02017	0.513304	1.97637	0.0481128	0.180151	5.0302	5.82906	11.3912	10.0374	17.537	13.3613	24.6923	9.31204
9630028B13Rik	110.174	-1.117	0.461053	0.260146	-4.29373	1.75698e-05	0.000520516	185.111	123.382	171.904	124.098	49.3227	46.2507	111.997	69.3229
9630050E16Rik	76.0954	-0.221742	0.85753	0.236616	-0.937137	0.348688	0.596891	104.628	64.1196	63.1695	95.8113	62.4754	55.5008	74.0769	88.9817
9830144P21Rik	2.73596	1.77135	3.41372	1.10412	1.60431	0.108646	NA	1.00604	1.94302	2.07113	0	6.57636	3.08338	6.17308	1.03467
9930004E17Rik	5.10598	0.21802	1.16314	0.765855	0.284675	0.775893	NA	6.03624	5.82906	6.21339	0.912488	3.28818	3.08338	6.17308	9.31204
9930012K11Rik	16.4655	-0.243375	0.844767	0.489513	-0.497177	0.619064	0.802304	15.0906	14.5726	13.4623	28.2871	18.633	4.11117	22.0467	15.5201
9930014A18Rik	44.2944	-0.217234	0.860213	0.306443	-0.70889	0.478393	0.703442	29.1751	63.1481	60.0628	38.3245	29.5936	54.473	42.3297	37.2481
9930017N22Rik	169.172	-0.0834291	0.943812	0.142271	-0.586408	0.557601	0.760169	192.153	189.444	158.441	156.036	154.544	174.725	149.036	178.998
9930021J03Rik	1001.95	-0.0239137	0.983561	0.0827582	-0.288958	0.772613	0.891501	897.387	1079.35	1094.59	969.975	1002.9	966.125	996.511	1008.8
9930024M15Rik	73.8968	-0.411797	0.751687	0.217942	-1.88948	0.0588272	0.205141	67.4046	95.2079	82.8452	91.2488	76.7242	59.612	46.739	71.3923
9930104L06Rik	209.596	0.0593434	1.04199	0.145866	0.406834	0.68413	0.842541	169.015	185.558	249.571	217.172	207.155	238.448	214.294	195.553
9930111J21Rik1	2.46197	3.14898	8.87026	1.39295	2.26066	0.0237804	NA	0	0	2.07113	0	6.57636	4.11117	1.76374	5.17335
9930111J21Rik2	5.40636	0.0704515	1.05005	0.837431	0.0841282	0.932955	NA	2.01208	6.80057	4.14226	8.2124	5.4803	5.13896	11.4643	0
9930120I10Rik	11.1337	-0.673349	0.627049	0.593216	-1.13508	0.25634	0.502983	15.0906	11.6581	18.6402	9.12488	18.633	3.08338	3.52747	9.31204
A030001D20Rik	33.5248	-1.09304	0.468773	0.375593	-2.91017	0.00361235	0.0294456	55.3322	38.8604	27.9603	60.2242	35.0739	17.4725	22.9286	10.3467
A030005L19Rik	4.54286	-0.535818	0.689767	0.823796	-0.650425	0.515417	NA	1.00604	2.91453	10.3557	7.29991	3.28818	3.08338	5.29121	3.10401
A130006I12Rik	4.15061	0.7106	1.63648	0.828335	0.857865	0.390967	NA	3.01812	5.82906	1.03557	2.73747	4.38424	2.05559	7.93681	6.20802
A130010J15Rik	76.1483	0.0142532	1.00993	0.212673	0.0670193	0.946566	0.976157	82.4952	73.8347	76.6318	70.2616	58.0912	72.9733	71.4313	103.467
A130012E19Rik	41.7842	0.29156	1.22396	0.276422	1.05476	0.291533	0.541887	31.1872	38.8604	33.1381	46.5369	52.6109	48.3063	30.8654	52.7682
A130014A01Rik	47.5248	-0.0195208	0.98656	0.282966	-0.0689866	0.945	0.975108	42.2536	64.1196	27.9603	56.5743	48.2266	48.3063	37.9203	54.8376
A130048G24Rik	49.8358	-0.0487077	0.966802	0.243094	-0.200365	0.841195	0.92786	57.3442	46.6324	56.9561	41.9745	39.4582	59.612	44.9753	51.7335
A130050O07Rik	247.351	0.0694492	1.04932	0.132863	0.522712	0.601175	0.79141	236.419	268.137	260.962	200.747	243.325	284.699	261.033	223.489
A130051J06Rik	4.29264	-0.575256	0.671167	0.771452	-0.74568	0.455861	NA	7.04227	5.82906	4.14226	3.64995	2.19212	2.05559	5.29121	4.13868
A130071D04Rik	2.42742	0.847825	1.79979	1.29	0.657227	0.511035	NA	1.00604	0.971509	3.1067	1.82498	9.86454	0	2.6456	0
A230006K03Rik	4.51037	-0.306873	0.808392	0.888237	-0.345486	0.729729	NA	7.04227	7.77207	5.17783	0	5.4803	1.02779	4.40934	5.17335
A230020J21Rik	2.39089	0.547163	1.46121	1.20921	0.452495	0.650913	NA	3.01812	0	1.03557	3.64995	6.57636	3.08338	1.76374	0
A230028O05Rik	2.07653	-2.14345	0.226338	1.53589	-1.39557	0.162843	NA	0	1.94302	5.17783	6.38742	0	0	0	3.10401
A230050P20Rik	14.9671	0.703977	1.62899	0.443853	1.58606	0.112726	0.307972	11.0664	13.6011	5.17783	15.5123	20.8251	21.5836	18.5192	13.4507
A230052G05Rik	16.081	-1.22926	0.426536	0.476478	-2.57989	0.00988304	0.0607358	17.1027	22.3447	35.2092	15.5123	5.4803	11.3057	6.17308	15.5201
A230056P14Rik	44.3908	-0.27829	0.824568	0.263574	-1.05583	0.291044	0.541363	49.2959	34.0028	63.1695	48.3619	37.266	46.2507	40.5659	36.2135
A230057D06Rik	376.752	-0.267699	0.830644	0.14834	-1.80463	0.0711323	0.231661	388.331	339.057	546.778	373.208	357.316	302.171	385.376	321.783
A230059L01Rik	3.3427	0.341285	1.26688	0.911474	0.374432	0.708083	NA	5.0302	4.85755	1.03557	0.912488	3.28818	5.13896	4.40934	2.06934
A230072C01Rik	42.104	0.259526	1.19709	0.253027	1.02569	0.30504	0.555088	41.2476	41.7749	38.3159	31.9371	47.1306	54.473	40.5659	41.3868
A230072E10Rik	15.4026	0.0680235	1.04828	0.457685	0.148625	0.881849	0.948782	14.0845	20.4017	15.5335	10.0374	27.4015	11.3057	14.1099	10.3467
A230072I06Rik	15.3125	1.01265	2.01762	0.556529	1.81959	0.0688216	0.227101	6.03624	19.4302	11.3912	3.64995	31.7857	22.6114	7.93681	19.6587
A230077H06Rik	8.57558	0.269944	1.20576	0.613041	0.440335	0.659694	NA	4.02416	12.6296	5.17783	9.12488	16.4409	4.11117	8.81868	8.27737
A230081H15Rik	25.2013	-0.838337	0.559288	0.414531	-2.02238	0.0431375	0.167821	31.1872	17.4872	49.7071	31.0246	8.76848	27.7504	14.9918	20.6934
A230083G16Rik	3.22148	-1.45554	0.364618	1.03358	-1.40825	0.159058	NA	4.02416	0.971509	10.3557	3.64995	0	2.05559	2.6456	2.06934
A230083N12Rik	2.17617	-0.0489549	0.966636	1.36529	-0.0358569	0.971396	NA	4.02416	2.91453	0	1.82498	6.57636	0	0	2.06934
A230085B16Rik	48.5008	-0.510125	0.702162	0.277596	-1.83765	0.0661137	0.221655	68.4107	48.5755	71.454	40.1495	27.4015	44.1951	48.5027	39.3175
A230087F16Rik	7.55846	0.632295	1.55003	0.761693	0.830117	0.406472	NA	5.0302	5.82906	7.24896	5.47493	23.0173	1.02779	3.52747	9.31204
A230103J11Rik	6.76164	-0.754738	0.592654	0.735364	-1.02635	0.304729	NA	1.00604	14.5726	8.28452	10.0374	7.67242	2.05559	5.29121	5.17335
A230103L15Rik	27.0599	-0.337634	0.791338	0.341391	-0.988995	0.322666	0.571402	35.2114	23.3162	35.2092	27.3747	29.5936	17.4725	31.7472	16.5547
A230107N01Rik	18.377	0.0317939	1.02228	0.522932	0.0607993	0.951519	0.97887	13.0785	7.77207	20.7113	31.0246	31.7857	14.3891	22.0467	6.20802
A2m	27.1826	0.379037	1.30047	0.359007	1.05579	0.291063	0.541363	29.1751	16.5157	21.7469	27.3747	26.3054	31.8616	45.8571	18.6241
A330008L17Rik	24.6479	-1.40245	0.378287	0.357443	-3.92356	8.72495e-05	0.00189288	38.2295	23.3162	41.4226	40.1495	15.3448	10.2779	14.9918	13.4507
A330009N23Rik	6.05106	0.740899	1.67122	0.728451	1.01709	0.309111	NA	2.01208	2.91453	3.1067	10.0374	7.67242	4.11117	12.3462	6.20802
A330015K06Rik	3.40678	1.10378	2.14917	0.934737	1.18084	0.237665	NA	2.01208	1.94302	1.03557	3.64995	3.28818	1.02779	7.05494	7.2427
A330023F24Rik	137.64	0.163089	1.11968	0.17869	0.912691	0.361405	0.607762	144.87	144.755	85.9519	143.261	158.929	145.947	136.69	140.715
A330035P11Rik	29.1246	-0.125533	0.916665	0.325743	-0.385375	0.699959	0.851922	21.1268	25.2592	34.1736	41.062	28.4976	21.5836	34.3928	26.9014
A330041J22Rik	2.73475	1.40304	2.64459	1.14901	1.22109	0.222053	NA	0	0	5.17783	0.912488	3.28818	5.13896	5.29121	2.06934
A330048O09Rik	5.07523	0.547422	1.46147	0.842264	0.649941	0.51573	NA	5.0302	7.77207	0	3.64995	2.19212	6.16676	4.40934	11.3814
A330069E16Rik	14.7054	-0.59063	0.664053	0.502849	-1.17457	0.240167	0.484154	21.1268	15.5441	7.24896	26.4622	14.2488	9.25013	6.17308	17.5894
A330074H02Rik	425.845	-0.114724	0.923559	0.118233	-0.970328	0.331883	0.580168	527.165	420.664	377.981	444.382	423.079	428.59	360.684	424.215
A330074K22Rik	14.5766	-0.386742	0.764855	0.43272	-0.893746	0.371458	0.617156	11.0664	17.4872	23.818	13.6873	13.1527	12.3335	10.5824	14.4854
A330076H08Rik	179.434	-0.140566	0.907163	0.149195	-0.942164	0.346109	0.594496	197.184	191.387	220.575	144.173	164.409	170.614	170.201	176.929
A330084C13Rik	101.208	-1.29406	0.407802	0.305381	-4.23753	2.25993e-05	0.000641339	131.791	98.1224	251.642	93.9863	66.8597	35.9727	72.3132	58.9762
A330093E20Rik	3.20472	-1.26627	0.415733	1.07116	-1.18215	0.237147	NA	3.01812	6.80057	2.07113	6.38742	0	0	5.29121	2.06934
A330094K24Rik	1.94966	0.0798295	1.05689	1.20777	0.0660967	0.947301	NA	1.00604	0	1.03557	5.47493	2.19212	2.05559	1.76374	2.06934
A330102I10Rik	11.1651	0.285726	1.21902	0.622612	0.458915	0.646295	0.81906	7.04227	3.88604	25.8891	3.64995	12.0567	11.3057	14.1099	11.3814
A3galt2	70.4814	-0.0803098	0.945854	0.246551	-0.325733	0.744626	0.877207	99.5979	68.0057	76.6318	45.6244	66.8597	78.1122	55.5577	73.4616
A430005L14Rik	122.187	0.287788	1.22077	0.172872	1.66475	0.0959632	0.279433	96.5798	137.954	91.1297	114.061	150.16	121.28	134.926	131.403
A430010J10Rik	1.98707	-0.398447	0.758675	1.26666	-0.314564	0.753093	NA	2.01208	1.94302	5.17783	0	0	3.08338	2.6456	1.03467
A430018G15Rik	2.99265	-0.459508	0.727234	0.900788	-0.510118	0.609969	NA	4.02416	1.94302	5.17783	2.73747	3.28818	2.05559	2.6456	2.06934
A430027C01Rik	45.3595	-0.276519	0.825581	0.273783	-1.00999	0.312498	0.562438	46.2778	59.2621	43.4937	50.1869	24.1133	42.1395	52.9121	44.4908
A430027H14Rik	22.9453	-0.0587788	0.960076	0.404753	-0.145221	0.884536	0.949546	40.2416	20.4017	16.569	16.4248	28.4976	13.3613	21.1648	26.9014
A430033K04Rik	284.712	0.116787	1.08432	0.113063	1.03293	0.301637	0.551785	288.733	258.421	273.389	272.834	275.111	328.894	311.299	269.014
A430035B10Rik	6.02791	-0.333291	0.793724	0.749896	-0.444449	0.656718	NA	4.02416	4.85755	13.4623	4.56244	2.19212	11.3057	2.6456	5.17335
A430046D13Rik	59.1983	0.186033	1.13763	0.251036	0.741061	0.458656	0.688475	62.3744	43.7179	56.9561	58.3993	46.0345	82.2234	49.3846	74.4963
A430057M04Rik	15.0869	-1.07187	0.475702	0.512945	-2.08964	0.03665	0.150538	27.1631	23.3162	18.6402	12.7748	16.4409	4.11117	14.1099	4.13868
A430073D23Rik	8.21018	1.63687	3.10991	0.704583	2.32318	0.0201694	NA	3.01812	1.94302	9.32009	1.82498	19.7291	13.3613	12.3462	4.13868
A430078G23Rik	7.31278	-1.9341	0.261684	0.649362	-2.97846	0.00289697	NA	10.0604	12.6296	14.4979	9.12488	4.38424	2.05559	2.6456	3.10401
A430078I02Rik	4.63537	-0.830927	0.562168	0.772674	-1.07539	0.282199	NA	5.0302	6.80057	7.24896	4.56244	3.28818	6.16676	0.881868	3.10401
A430103D13Rik	24.8583	0.818973	1.76415	0.331298	2.47201	0.0134354	0.0752178	22.1329	13.6011	21.7469	14.5998	35.0739	29.806	30.8654	31.0401
A430105J06Rik	22.1934	-0.347746	0.785811	0.413399	-0.841186	0.400244	0.641708	18.1087	24.2877	24.8536	31.9371	12.0567	22.6114	10.5824	33.1095
A430106G13Rik	124.842	-0.0483051	0.967072	0.159801	-0.302282	0.762437	0.886658	114.688	137.954	140.837	114.061	122.759	137.724	107.588	123.126
A430108G06Rik	7.3556	-0.185319	0.879455	0.687055	-0.269729	0.787369	NA	3.01812	3.88604	14.4979	10.0374	3.28818	10.2779	9.70055	4.13868
A430110C17Rik	89.3399	-0.068353	0.953726	0.230433	-0.296629	0.76675	0.888417	114.688	92.2934	63.1695	95.8113	82.2045	106.89	99.6511	60.0109
A430110L20Rik	21.174	0.438188	1.3549	0.416859	1.05117	0.293183	0.543156	28.1691	19.4302	13.4623	10.9499	31.7857	26.7226	26.456	12.416
A4galt	15.0592	-0.0533559	0.963692	0.53111	-0.100461	0.919978	0.964792	28.1691	13.6011	3.1067	16.4248	19.7291	11.3057	16.7555	11.3814
A530013C23Rik	1.42347	3.97549	15.7305	1.86887	2.12722	0.033402	NA	0	0	0	0	1.09606	8.22234	0	2.06934
A530017D24Rik	51.5243	0.0102734	1.00715	0.237425	0.04327	0.965486	0.98522	57.3442	42.7464	55.9205	49.2744	47.1306	52.4174	43.2115	64.1496
A530041M06Rik	37.0863	0.0280628	1.01964	0.279073	0.100557	0.919902	0.964772	39.2355	32.0598	44.5293	31.0246	40.5542	31.8616	30.8654	46.5602
A530058N18Rik	19.3618	0.50227	1.41644	0.421083	1.1928	0.232946	0.475626	15.0906	21.3732	16.569	10.9499	35.0739	12.3335	17.6374	25.8668
A530064N14Rik	146.418	-0.0158211	0.989094	0.17292	-0.0914933	0.927101	0.967746	178.069	143.783	115.983	151.473	142.488	145.947	174.61	118.987
A530065N20Rik	2.23756	-0.00618228	0.995724	1.27623	-0.00484418	0.996135	NA	6.03624	0	2.07113	0.912488	1.09606	5.13896	2.6456	0
A530072M11Rik	2.25235	-1.30448	0.404866	1.21346	-1.07502	0.282368	NA	1.00604	4.85755	4.14226	2.73747	2.19212	3.08338	0	0
A530083I20Rik	48.29	0.552123	1.46624	0.242711	2.27482	0.0229169	0.10894	45.2718	30.1168	37.2803	43.7994	54.803	61.6676	50.2665	63.1149
A530083M17Rik	60.2322	-0.130742	0.913362	0.226432	-0.5774	0.563669	0.763885	55.3322	63.1481	81.8096	52.0118	58.0912	54.473	65.2582	51.7335
A530084C06Rik	10.5735	-0.248029	0.842046	0.497427	-0.498623	0.618045	0.801609	12.0725	15.5441	9.32009	9.12488	6.57636	8.22234	12.3462	11.3814
A630001G21Rik	9.60569	-0.642513	0.640596	0.646808	-0.993361	0.320534	0.569422	7.04227	23.3162	8.28452	8.2124	2.19212	15.4169	6.17308	6.20802
A630052C17Rik	38.6762	-0.0468652	0.968037	0.288166	-0.162633	0.870808	0.94303	33.1993	34.9743	46.6004	42.887	35.0739	34.945	53.7939	27.9361
A630072L19Rik	2.53703	-0.853919	0.55328	1.05282	-0.811075	0.417323	NA	2.01208	1.94302	7.24896	1.82498	3.28818	1.02779	0.881868	2.06934
A630072M18Rik	70.1678	-0.0555238	0.962245	0.22997	-0.241439	0.809215	0.90982	79.4771	79.6638	62.1339	64.7867	55.8991	97.6403	61.7308	60.0109
A630081D01Rik	2.52902	1.21978	2.32911	1.23365	0.988759	0.322781	NA	0	0.971509	5.17783	0	6.57636	1.02779	4.40934	2.06934
A630089N07Rik	389.993	0.402799	1.32207	0.119049	3.38348	0.000715728	0.00910568	376.259	338.085	268.211	360.433	414.311	483.063	423.297	456.29
A730011C13Rik	28.4976	-0.526886	0.694051	0.310521	-1.69678	0.0897382	0.26807	34.2053	40.8034	23.818	35.587	26.3054	23.6392	22.9286	20.6934
A730013G03Rik	2.30898	1.06699	2.09506	1.40438	0.759761	0.447397	NA	6.03624	0	0	0	1.09606	1.02779	6.17308	4.13868
A730015C16Rik	3.82612	0.111243	1.08016	1.06637	0.104319	0.916916	NA	2.01208	5.82906	3.1067	3.64995	8.76848	0	0	7.2427
A730017L22Rik	121.917	-0.655095	0.635034	0.203208	-3.22377	0.00126517	0.0138938	182.093	152.527	165.69	96.7238	101.934	94.5569	103.179	78.635
A730018C14Rik	2.01082	0.421296	1.33913	1.37252	0.30695	0.758881	NA	5.0302	0	0	1.82498	4.38424	3.08338	1.76374	0
A730020E08Rik	137.801	-0.361071	0.778586	0.192533	-1.87538	0.0607409	0.209841	139.839	140.869	206.077	134.136	90.973	117.168	148.154	125.195
A730035I17Rik	8.2245	-0.850172	0.554719	0.606805	-1.40106	0.161195	NA	14.0845	10.6866	8.28452	9.12488	8.76848	9.25013	3.52747	2.06934
A730036I17Rik	2.08959	-0.476747	0.718596	1.2209	-0.39049	0.696175	NA	2.01208	6.80057	0	0.912488	1.09606	1.02779	1.76374	3.10401
A730046J19Rik	3.25828	-0.933004	0.523767	1.06296	-0.877745	0.380082	NA	8.04831	0.971509	7.24896	0.912488	3.28818	0	3.52747	2.06934
A730049H05Rik	2.32207	0.52304	1.43698	1.4064	0.371901	0.709967	NA	1.00604	4.85755	0	1.82498	0	0	8.81868	2.06934
A730056A06Rik	31.2486	0.00458651	1.00318	0.318143	0.0144165	0.988498	0.994984	32.1933	22.3447	30.0314	40.1495	36.17	19.5281	34.3928	35.1788
A730060N03Rik	3.1937	0.744766	1.6757	1.06039	0.702354	0.482458	NA	0	3.88604	2.07113	3.64995	1.09606	4.11117	9.70055	1.03467
A730062M13Rik	10.6379	1.34221	2.5354	0.699345	1.91924	0.054954	0.195972	0	4.85755	6.21339	12.7748	25.2094	19.5281	6.17308	10.3467
A730063M14Rik	20.8918	-0.619632	0.650837	0.37095	-1.67039	0.094842	0.277513	16.0966	25.2592	27.9603	31.9371	18.633	13.3613	19.4011	14.4854
A730071L15Rik	4.06579	-1.64254	0.320292	0.944063	-1.73986	0.081883	NA	7.04227	6.80057	7.24896	3.64995	0	5.13896	2.6456	0
A730081D07Rik	12.1741	1.27614	2.4219	0.47589	2.68158	0.00732747	0.0492866	7.04227	8.74358	6.21339	6.38742	18.633	15.4169	13.228	21.7281
A730089K16Rik	42.5822	-0.670076	0.628473	0.300038	-2.23331	0.0255286	0.117514	71.4288	52.4615	40.387	44.7119	33.9779	23.6392	26.456	47.5949
A730090N16Rik	5.31813	-0.534812	0.690249	0.754622	-0.708715	0.478501	NA	6.03624	5.82906	3.1067	10.0374	5.4803	8.22234	1.76374	2.06934
A730091E23Rik	19.752	0.709839	1.63562	0.418441	1.69639	0.0898125	0.268244	12.0725	15.5441	18.6402	13.6873	14.2488	27.7504	16.7555	39.3175
A730094K22Rik	29.4866	0.732219	1.66119	0.331142	2.21119	0.0270227	0.122288	23.1389	23.3162	13.4623	28.2871	41.6503	35.9727	25.5742	44.4908
A830005F24Rik	3.69989	-0.353684	0.782583	0.882807	-0.400636	0.688688	NA	6.03624	6.80057	1.03557	2.73747	3.28818	5.13896	3.52747	1.03467
A830009L08Rik	2.64968	-0.515954	0.69933	1.06067	-0.486444	0.626653	NA	2.01208	5.82906	1.03557	3.64995	2.19212	0	4.40934	2.06934
A830011K09Rik	6.56855	-0.469967	0.721981	0.621898	-0.755698	0.44983	NA	7.04227	10.6866	8.28452	4.56244	5.4803	4.11117	6.17308	6.20802
A830018L16Rik	12.8552	0.556909	1.47111	0.558845	0.996536	0.31899	0.567875	13.0785	2.91453	8.28452	17.3373	19.7291	8.22234	22.9286	10.3467
A830019L24Rik	1.52133	1.13556	2.19704	1.68128	0.675414	0.499413	NA	1.00604	0	0	2.73747	3.28818	5.13896	0	0
A830031A19Rik	4.23709	-1.96838	0.255539	1.01651	-1.93641	0.0528176	NA	1.00604	2.91453	10.3557	12.7748	1.09606	0	2.6456	3.10401
A830035O19Rik	2.93242	-0.737739	0.599678	0.992207	-0.743533	0.457159	NA	5.0302	1.94302	4.14226	3.64995	0	1.02779	3.52747	4.13868
A830036E02Rik	2.64795	-0.613378	0.653664	1.3034	-0.470599	0.637927	NA	2.01208	6.80057	4.14226	0	0	2.05559	6.17308	0
A830052D11Rik	18.8671	0.218939	1.16388	0.398052	0.550027	0.582301	0.777493	20.1208	14.5726	17.6046	17.3373	15.3448	28.7782	12.3462	24.8321
A830073O21Rik	5.09036	-1.27672	0.412733	0.819797	-1.55736	0.119385	NA	7.04227	5.82906	12.4268	3.64995	2.19212	0	4.40934	5.17335
A830082K12Rik	426.817	0.17866	1.13183	0.0944584	1.89141	0.0585691	0.20441	389.337	389.575	419.404	404.232	427.463	477.924	482.382	424.215
A830082N09Rik	167.377	-0.0964554	0.935328	0.17127	-0.563178	0.573314	0.770744	167.003	159.328	230.931	135.048	164.409	179.864	153.445	148.993
A830092H15Rik	30.8512	-0.195456	0.873297	0.413897	-0.472235	0.636759	0.813446	16.0966	28.1738	56.9561	31.0246	18.633	25.6948	48.5027	21.7281
A930001C03Rik	3.28783	0.31151	1.24101	1.03087	0.302181	0.762514	NA	1.00604	7.77207	1.03557	1.82498	8.76848	1.02779	1.76374	3.10401
A930002H24Rik	2.45546	1.2563	2.38883	1.118	1.12371	0.261136	NA	0	2.91453	1.03557	1.82498	5.4803	1.02779	5.29121	2.06934
A930003O13Rik	2.03218	0.387207	1.30786	1.25966	0.307391	0.758545	NA	2.01208	0	4.14226	0.912488	3.28818	0	1.76374	4.13868
A930004D18Rik	212.037	-0.32309	0.799356	0.142142	-2.27301	0.0230259	0.109214	243.462	250.649	221.611	227.21	157.833	172.669	186.956	235.905
A930004J17Rik	328.154	-0.0542798	0.963075	0.10755	-0.504692	0.613775	0.799478	329.981	368.202	321.025	317.546	351.835	294.977	309.536	332.129
A930005G22Rik	31.871	-0.247379	0.842426	0.304832	-0.811526	0.417064	0.654665	38.2295	24.2877	37.2803	38.3245	30.6897	28.7782	21.1648	36.2135
A930005H10Rik	36.6937	0.291244	1.22369	0.302794	0.961855	0.336122	0.584104	50.302	29.1453	27.9603	24.6372	37.266	48.3063	33.511	42.4215
A930006K02Rik	29.9045	-0.640681	0.64141	0.325678	-1.96723	0.0491573	0.18232	45.2718	36.9174	39.3515	24.6372	20.8251	25.6948	29.9835	16.5547
A930007I19Rik	20.0113	0.184474	1.1364	0.392163	0.470402	0.638068	0.813952	17.1027	16.5157	18.6402	22.8122	12.0567	30.8338	25.5742	16.5547
A930012L18Rik	1.848	-1.40079	0.37872	1.27912	-1.09512	0.273463	NA	1.00604	0.971509	4.14226	4.56244	2.19212	1.02779	0.881868	0
A930012O16Rik	4.24879	-0.43893	0.737682	0.994036	-0.441563	0.658805	NA	3.01812	11.6581	2.07113	2.73747	1.09606	6.16676	0	7.2427
A930015D03Rik	17.9508	0.244276	1.1845	0.454766	0.537146	0.591167	0.783189	21.1268	7.77207	17.6046	19.1623	27.4015	8.22234	18.5192	23.7974
A930015P04Rik	4.21465	0.418844	1.33686	1.25785	0.332984	0.739146	NA	0	0	14.4979	0	8.76848	2.05559	5.29121	3.10401
A930017M01Rik	9.63134	-0.262704	0.833524	0.610122	-0.430575	0.666777	0.831658	2.01208	10.6866	16.569	12.7748	4.38424	11.3057	7.93681	11.3814
A930019D19Rik	1.54213	1.09484	2.13589	1.47292	0.743311	0.457294	NA	0	0	2.07113	1.82498	3.28818	3.08338	0	2.06934
A930024E05Rik	110.577	-0.485948	0.714028	0.208823	-2.32708	0.0199609	0.0989234	120.725	101.037	140.837	154.211	61.3794	98.6681	114.643	93.1204
A930024N18Rik	27.2508	0.002545	1.00177	0.337949	0.00753071	0.993991	0.997154	26.157	21.3732	41.4226	20.0747	30.6897	30.8338	24.6923	22.7628
A930027P06Rik	1.82183	-0.503627	0.705331	1.27504	-0.394988	0.692851	NA	1.00604	0.971509	1.03557	5.47493	3.28818	0	1.76374	1.03467
A930028N01Rik	5.3417	-0.383177	0.766747	0.865854	-0.442542	0.658097	NA	2.01208	0.971509	8.28452	12.7748	9.86454	4.11117	2.6456	2.06934
A930029G22Rik	2.8267	0.884162	1.84569	1.01652	0.869791	0.384415	NA	1.00604	0.971509	5.17783	0.912488	2.19212	4.11117	6.17308	2.06934
A930030B08Rik	7.63383	1.60931	3.05107	0.794859	2.02465	0.0429029	NA	1.00604	3.88604	10.3557	0	8.76848	18.5003	12.3462	6.20802
A930033H14Rik	33.4205	0.0424806	1.02988	0.320236	0.132654	0.894467	0.954003	39.2355	22.3447	30.0314	40.1495	42.7463	25.6948	42.3297	24.8321
A930033M14Rik	2.50216	0.625441	1.54268	1.34322	0.46563	0.641481	NA	0	2.91453	4.14226	0.912488	0	4.11117	7.93681	0
A930035D04Rik	26.6051	-0.283018	0.82187	0.309158	-0.915448	0.359957	0.606162	31.1872	28.1738	28.9958	28.2871	28.4976	26.7226	20.283	20.6934
A930036I15Rik	26.7794	0.236886	1.17845	0.324405	0.730219	0.465256	0.693687	17.1027	26.2308	33.1381	21.8997	27.4015	33.9172	25.5742	28.9708
A930037H05Rik	103.166	-0.146322	0.903551	0.167659	-0.872733	0.382808	0.627195	101.61	121.439	94.2364	115.886	97.5494	94.5569	93.478	106.571
A930040O22Rik	8.59901	-0.256554	0.837085	0.556395	-0.461101	0.644727	NA	12.0725	12.6296	7.24896	5.47493	7.67242	10.2779	6.17308	7.2427
AA386476	25.3712	0.250828	1.18989	0.379763	0.660486	0.508942	0.727115	18.1087	14.5726	35.2092	24.6372	32.8818	35.9727	16.7555	24.8321
AA387200	27.4397	-0.589712	0.664475	0.330327	-1.78524	0.0742228	0.237814	25.151	29.1453	31.067	46.5369	17.537	20.5559	24.6923	24.8321
AA413626	10.1991	-1.28451	0.410509	0.637308	-2.01553	0.043849	0.169876	13.0785	7.77207	25.8891	10.9499	5.4803	7.19455	0.881868	10.3467
AA414768	12.1265	1.08634	2.12335	0.537822	2.01989	0.0433946	0.168549	8.04831	6.80057	4.14226	11.8623	26.3054	18.5003	14.1099	7.2427
AA465934	45.6611	0.400294	1.31978	0.254827	1.57085	0.116218	0.314308	37.2235	40.8034	36.2448	42.887	67.9557	39.0561	49.3846	51.7335
AA474408	50.9114	0.126928	1.09197	0.272215	0.466277	0.641017	0.815769	65.3926	34.0028	59.0272	36.4995	46.0345	63.7231	46.739	55.8722
AA543186	11.1963	-0.554778	0.680762	0.540892	-1.02567	0.305046	0.555088	25.151	7.77207	10.3557	10.0374	7.67242	7.19455	7.93681	13.4507
AA619741	1.69403	-0.199896	0.870613	1.85347	-0.107849	0.914115	NA	0	0	7.24896	0	2.19212	4.11117	0	0
AA914427	19.2335	0.15725	1.11516	0.406147	0.387175	0.698627	0.851229	11.0664	27.2023	12.4268	21.8997	21.9212	14.3891	21.1648	23.7974
AA986860	19.9509	1.12735	2.18457	0.396493	2.8433	0.00446494	0.034478	19.1147	6.80057	12.4268	11.8623	23.0173	34.945	25.5742	25.8668
Aaas	284.168	-0.0290854	0.980041	0.136074	-0.213747	0.830744	0.922702	299.8	281.738	227.824	337.621	311.281	256.948	260.151	297.985
Aacs	409.466	-0.156731	0.897055	0.112188	-1.39704	0.1624	0.382611	391.349	392.49	490.858	452.594	362.796	355.616	404.777	425.25
Aaed1	106.548	0.43179	1.34891	0.167741	2.57415	0.0100486	0.0615513	94.5677	100.065	75.5963	92.1613	128.239	117.168	111.115	133.473
Aagab	387.012	0.00375015	1.0026	0.102717	0.0365095	0.970876	0.986945	428.573	356.544	402.835	358.608	394.582	404.95	388.904	361.1
Aak1	1796.76	0.0119626	1.00833	0.0786421	0.152115	0.879096	0.947653	1900.41	1596.19	1932.36	1729.17	1728.49	1914.78	1785.78	1786.88
Aamdc	123.464	0.12441	1.09006	0.186933	0.665531	0.505711	0.724452	102.616	119.496	137.73	112.236	158.929	103.807	104.942	147.958
Aamp	947.524	-0.0711266	0.951894	0.0789985	-0.900355	0.367931	0.613529	946.683	1055.06	972.396	910.663	864.791	914.736	975.346	940.516
Aar2	283.352	0.43391	1.35089	0.114604	3.78616	0.000152995	0.00284662	251.51	262.308	200.9	249.109	318.954	331.977	327.173	324.887
Aard	10.5932	1.19228	2.28514	0.60339	1.97597	0.0481579	0.180199	12.0725	1.94302	8.28452	3.64995	20.8251	8.22234	19.4011	10.3467
Aars	1188.56	-0.0574414	0.960967	0.0747452	-0.768496	0.442193	0.675614	1184.11	1254.22	1142.23	1268.36	1132.23	1235.41	1205.51	1086.4
Aars2	200.828	-0.00530797	0.996328	0.156244	-0.0339723	0.972899	0.988089	162.978	244.82	180.188	216.26	212.636	168.558	196.657	224.524
Aarsd1	27.8045	-0.705239	0.613341	0.374053	-1.8854	0.0593759	0.206669	40.2416	22.3447	42.4582	32.8496	24.1133	30.8338	20.283	9.31204
Aasdh	242.011	-0.315106	0.803792	0.118368	-2.66209	0.00776561	0.051295	289.739	240.934	283.745	259.147	208.251	209.67	210.766	233.836
Aasdhppt	209.572	0.286276	1.21949	0.131518	2.1767	0.0295028	0.129846	213.28	207.903	166.726	167.898	217.02	234.337	240.75	228.662
Aass	9.11805	-1.25197	0.419876	0.610555	-2.05054	0.0403121	NA	13.0785	8.74358	16.569	12.7748	12.0567	2.05559	3.52747	4.13868
Aatf	456.561	-0.189896	0.876669	0.10692	-1.77606	0.0757231	0.240979	472.838	485.755	565.419	423.395	434.04	408.034	453.28	409.73
Aatk	215.025	0.220388	1.16505	0.189846	1.16088	0.245691	0.490247	141.852	195.273	287.887	169.723	226.884	265.171	203.711	229.697
AB124611	4.70058	0.521613	1.43556	0.862868	0.60451	0.545504	NA	1.00604	0.971509	5.17783	8.2124	5.4803	10.2779	4.40934	2.06934
Abat	165.822	-0.0589108	0.959989	0.224932	-0.261905	0.793395	0.902203	149.9	171.957	209.184	145.086	249.902	155.197	106.706	138.646
Abca1	816.71	0.184159	1.13615	0.157295	1.17079	0.241684	0.48583	747.487	684.914	1011.75	615.93	883.424	688.621	1099.69	801.87
Abca13	1.47219	3.18332	9.08395	1.8773	1.69569	0.089945	NA	1.00604	0	0	0	5.4803	0	5.29121	0
Abca17	1.52232	-2.27553	0.206537	1.91241	-1.18987	0.234096	NA	0	0	7.24896	2.73747	2.19212	0	0	0
Abca2	643.235	0.111892	1.08064	0.096456	1.16003	0.246035	0.490527	618.714	538.216	688.651	628.704	618.178	701.982	703.731	647.704
Abca3	587.941	-0.095903	0.935686	0.0918134	-1.04454	0.296234	0.54599	536.219	616.908	674.153	603.155	549.126	560.147	580.269	583.554
Abca4	28.5062	0.75331	1.68566	0.38539	1.95467	0.050622	0.185952	23.1389	16.5157	31.067	14.5998	41.6503	23.6392	54.6758	22.7628
Abca5	163.118	0.0217629	1.0152	0.163759	0.132896	0.894276	0.95399	157.948	159.328	197.793	133.223	178.658	133.613	186.074	158.305
Abca6	7.09893	0.452298	1.36822	0.65942	0.685903	0.492774	NA	5.0302	4.85755	4.14226	10.0374	3.28818	6.16676	14.9918	8.27737
Abca7	214.973	-0.124711	0.917188	0.157795	-0.790337	0.429331	0.66485	211.268	169.043	274.425	242.722	183.042	193.225	214.294	231.766
Abca8a	12.6592	-1.21367	0.43117	0.701749	-1.7295	0.0837204	0.256749	12.0725	3.88604	40.387	14.5998	9.86454	1.02779	13.228	6.20802
Abca8b	38.6184	0.134652	1.09783	0.267947	0.502531	0.615294	0.800619	32.1933	44.6894	32.1025	38.3245	41.6503	31.8616	46.739	41.3868
Abca9	196.585	0.280517	1.21463	0.168951	1.66035	0.0968441	0.280981	193.16	156.413	176.046	185.235	226.884	166.502	282.198	186.241
Abcb10	203.786	0.311271	1.2408	0.121938	2.55269	0.0106893	0.0643536	171.027	190.416	172.939	192.535	238.941	232.281	216.94	215.212
Abcb1a	47.4997	0.483343	1.39798	0.249444	1.93768	0.0526623	0.191142	30.1812	45.6609	42.4582	40.1495	60.2833	60.6398	58.2033	42.4215
Abcb1b	8.51635	0.542398	1.45639	0.573778	0.945311	0.3445	NA	6.03624	9.71509	9.32009	2.73747	9.86454	13.3613	8.81868	8.27737
Abcb4	17.7325	-0.170566	0.888494	0.395959	-0.430768	0.666637	0.831545	14.0845	22.3447	16.569	21.8997	14.2488	20.5559	11.4643	20.6934
Abcb6	17.6065	0.455348	1.37111	0.411842	1.10564	0.268883	0.516885	11.0664	12.6296	13.4623	21.8997	28.4976	19.5281	14.1099	19.6587
Abcb7	433.159	-0.231592	0.851695	0.0945506	-2.4494	0.0143096	0.0788549	519.116	465.353	440.115	447.119	404.446	385.422	407.423	396.279
Abcb8	149.453	-0.341693	0.789115	0.14962	-2.28374	0.0223868	0.107209	176.057	167.1	162.584	163.335	133.719	116.141	158.736	117.952
Abcb9	38.893	-0.60838	0.655933	0.285767	-2.12894	0.0332595	0.141187	50.302	31.0883	54.885	52.0118	26.3054	28.7782	38.8022	28.9708
Abcc1	396.795	-0.0194295	0.986623	0.138266	-0.140522	0.888247	0.950619	420.524	330.313	345.879	500.044	401.158	386.45	349.22	440.77
Abcc10	119.066	-0.493822	0.710141	0.167176	-2.9539	0.00313787	0.0264914	156.942	119.496	137.73	142.348	97.5494	101.751	82.8956	113.814
Abcc12	3.42705	-0.036182	0.975232	0.952675	-0.0379794	0.969704	NA	5.0302	0.971509	4.14226	3.64995	8.76848	2.05559	1.76374	1.03467
Abcc2	1.90995	-1.39702	0.379713	1.67631	-0.833388	0.404626	NA	10.0604	0.971509	0	0	2.19212	2.05559	0	0
Abcc3	12.9649	1.42852	2.69171	0.561112	2.54588	0.0109004	0.0651937	7.04227	1.94302	5.17783	13.6873	30.6897	18.5003	13.228	13.4507
Abcc4	72.239	0.468298	1.38348	0.212799	2.20066	0.0277601	0.124437	57.3442	54.4045	59.0272	71.1741	105.222	67.8343	74.9588	87.947
Abcc5	1484.54	-0.150975	0.900642	0.0846093	-1.78437	0.074363	0.237953	1628.78	1517.5	1694.18	1408.88	1399.67	1552.99	1381.01	1293.34
Abcc6	6.59519	0.0327119	1.02293	1.05728	0.0309398	0.975318	NA	4.02416	0	18.6402	3.64995	2.19212	2.05559	21.1648	1.03467
Abcc8	142.26	-1.6756	0.313036	0.543316	-3.08402	0.00204221	0.019638	184.105	101.037	435.973	145.998	56.9951	45.2229	112.879	55.8722
Abcc9	179.357	0.274163	1.20929	0.166668	1.64496	0.0999775	0.287401	129.779	203.045	163.619	153.298	153.448	213.781	203.711	214.177
Abcd1	114.191	0.204385	1.1522	0.164232	1.24449	0.213319	0.449378	96.5798	112.695	118.054	97.6363	109.606	136.696	130.516	111.744
Abcd2	619.766	-0.0114229	0.992114	0.0905631	-0.126131	0.899628	0.955632	671.028	568.333	616.161	634.179	556.799	651.621	640.236	619.768
Abcd3	659.798	-0.093041	0.937544	0.0812984	-1.14444	0.252442	0.498291	674.046	723.774	692.793	634.179	656.54	608.453	654.346	634.253
Abcd4	293.939	0.191518	1.14197	0.145076	1.32012	0.186794	0.415352	267.606	341.971	210.22	277.396	327.722	277.504	302.481	346.615
Abce1	1186.78	-0.0873873	0.941226	0.0810949	-1.07759	0.281216	0.531323	1285.72	1204.67	1078.02	1322.2	1139.9	1111.04	1201.1	1151.59
Abcf1	1684.68	0.0637976	1.04521	0.0654311	0.975035	0.329543	0.577994	1614.69	1701.11	1662.08	1610.54	1749.31	1762.66	1595.3	1781.7
Abcf2	1045.02	-0.0731728	0.950545	0.0826234	-0.885618	0.375823	0.620999	1114.69	1123.06	951.684	1094.99	1064.27	1063.77	940.953	1006.73
Abcf3	434.702	-0.0729803	0.950672	0.0965456	-0.755915	0.4497	0.68157	416.5	463.41	463.933	437.994	462.537	434.756	389.786	408.695
Abcg1	172.649	0.197564	1.14676	0.138503	1.42642	0.153747	0.370215	157.948	139.897	162.584	182.498	196.195	195.281	178.137	168.651
Abcg2	186.498	0.265628	1.20216	0.168212	1.57912	0.114308	0.310488	193.16	121.439	168.797	193.448	238.941	202.475	171.964	201.761
Abcg3	4.28358	0.575633	1.49033	0.794272	0.72473	0.468618	NA	2.01208	3.88604	4.14226	3.64995	4.38424	8.22234	1.76374	6.20802
Abcg4	112.009	0.020083	1.01402	0.161005	0.124735	0.900733	0.95609	109.658	104.923	118.054	112.236	113.99	97.6403	110.233	129.334
Abcg5	13.8334	1.3619	2.57023	0.564933	2.41073	0.0159208	0.0849833	5.0302	3.88604	10.3557	11.8623	10.9606	12.3335	39.6841	16.5547
Abcg8	8.38657	0.12728	1.09223	0.729262	0.174532	0.861447	NA	1.00604	6.80057	4.14226	20.0747	5.4803	6.16676	14.1099	9.31204
Abhd1	15.3031	0.252422	1.19121	0.498538	0.506325	0.612629	0.798506	11.0664	18.4587	16.569	10.0374	15.3448	5.13896	28.2198	17.5894
Abhd10	167.745	-0.0975671	0.934608	0.159248	-0.612674	0.540092	0.748487	169.015	152.527	207.113	165.16	189.618	165.475	165.791	127.265
Abhd11	73.2134	-0.255594	0.837642	0.20861	-1.22522	0.220491	0.45881	94.5677	72.8632	82.8452	68.4366	83.3006	59.612	66.1401	57.9416
Abhd11os	2.39607	2.02172	4.06068	1.34566	1.5024	0.132994	NA	1.00604	0	0	2.73747	4.38424	0	7.93681	3.10401
Abhd12	280.268	-0.049427	0.96632	0.129937	-0.380393	0.703654	0.85316	243.462	268.137	283.745	344.921	270.727	270.309	304.244	256.598
Abhd13	271.684	0.339095	1.26496	0.13222	2.56463	0.0103285	0.0627416	243.462	262.308	234.038	219.91	289.36	371.033	293.662	259.702
Abhd14a	116.188	-0.0742792	0.949817	0.168775	-0.440108	0.659859	0.827622	125.755	126.296	123.232	101.286	128.239	94.5569	104.942	125.195
Abhd14b	18.7363	-0.120646	0.919776	0.428027	-0.281866	0.778046	0.894925	19.1147	27.2023	21.7469	10.0374	13.1527	17.4725	13.228	27.9361
Abhd15	17.6813	1.12474	2.18063	0.4549	2.47251	0.0134169	0.0752178	15.0906	6.80057	12.4268	10.0374	32.8818	25.6948	10.5824	27.9361
Abhd16a	241.868	-0.348842	0.785214	0.135268	-2.5789	0.00991144	0.0608626	296.782	222.476	317.918	247.284	206.059	220.975	213.412	210.038
Abhd17a	302.479	-0.0838103	0.943562	0.117404	-0.713861	0.475313	0.701423	311.872	300.196	302.385	331.233	304.705	261.059	340.401	267.98
Abhd17b	227.496	0.199672	1.14844	0.142887	1.39741	0.16229	0.382405	225.353	185.558	223.682	211.697	282.784	227.142	195.775	267.98
Abhd17c	415.98	0.119982	1.08672	0.100917	1.18892	0.234473	0.477562	400.404	422.607	408.013	363.17	474.594	414.2	396.841	448.012
Abhd18	87.521	-0.0906225	0.939117	0.226939	-0.399326	0.689653	0.845736	131.791	73.8347	89.0586	66.6117	92.0691	90.4458	82.8956	73.4616
Abhd2	1238.06	-0.00925222	0.993607	0.12502	-0.0740058	0.941006	0.973711	1207.25	998.712	1516.07	1247.37	1244.03	1056.57	1449.79	1184.7
Abhd3	8.17385	-0.105697	0.929356	0.618668	-0.170846	0.864345	NA	12.0725	6.80057	4.14226	10.9499	3.28818	5.13896	10.5824	12.416
Abhd4	216.532	0.145153	1.10585	0.169922	0.854233	0.392976	0.63525	182.093	222.476	223.682	193.448	300.32	195.281	172.846	242.113
Abhd5	92.5442	-0.1844	0.880015	0.219023	-0.841917	0.399834	0.641483	67.4046	95.2079	131.517	99.4612	90.973	103.807	72.3132	79.6696
Abhd6	96.517	-0.0981081	0.934257	0.176451	-0.556008	0.578205	0.774539	107.646	87.4358	88.023	115.886	88.7809	101.751	92.5961	90.0164
Abhd8	295.139	0.21412	1.16	0.130125	1.6455	0.0998674	0.287183	269.619	281.738	309.634	232.685	310.185	371.033	313.063	273.153
Abi1	483.372	0.0175899	1.01227	0.0963091	0.18264	0.855081	0.934342	531.189	451.752	466.004	473.581	496.515	459.423	529.121	459.394
Abi2	1361.61	-0.0285166	0.980428	0.078188	-0.364719	0.715321	0.860376	1412.48	1347.48	1501.57	1239.16	1372.27	1413.21	1287.53	1319.21
Abi3	19.1245	0.475956	1.39084	0.388431	1.22533	0.220451	0.458782	11.0664	15.5441	15.5335	21.8997	15.3448	20.5559	28.2198	24.8321
Abi3bp	2.62193	0.718169	1.64509	0.989305	0.725933	0.46788	NA	4.02416	0.971509	2.07113	0.912488	3.28818	4.11117	3.52747	2.06934
Abl1	1754.6	0.11605	1.08376	0.0761401	1.52416	0.127469	0.331087	1679.08	1711.8	1519.17	1824.06	1950.99	1822.28	1724.93	1804.47
Abl2	1190.02	0.207641	1.1548	0.0724252	2.86697	0.00414416	0.0326287	1042.26	1168.73	1131.87	1074.91	1264.85	1359.77	1225.8	1251.95
Ablim1	415.168	-0.0858951	0.9422	0.122463	-0.701398	0.483054	0.707274	400.404	371.117	521.925	417.92	371.564	381.311	451.516	405.591
Ablim2	9.58713	-0.407842	0.75375	0.553261	-0.737159	0.461026	0.690249	10.0604	8.74358	16.569	8.2124	12.0567	9.25013	3.52747	8.27737
Ablim3	82.0187	-0.358837	0.779793	0.232407	-1.544	0.122588	0.323898	86.5194	83.5498	133.588	65.6992	67.9557	71.9455	83.7775	63.1149
Abr	1273.87	-0.108335	0.927658	0.109131	-0.992707	0.320853	0.569748	1109.66	1360.11	1611.34	1206.31	1181.55	1328.94	1231.09	1161.94
Abracl	361.976	-0.327342	0.797003	0.118061	-2.77265	0.00556026	0.0405579	352.114	383.746	456.684	419.745	275.111	344.311	341.283	322.817
Abraxas1	102.773	0.351641	1.27601	0.190685	1.84409	0.0651696	0.219669	96.5798	91.3219	68.3473	104.936	94.2612	135.669	123.462	107.606
Abraxas2	367.698	0.154202	1.11281	0.107899	1.42913	0.152968	0.368842	358.15	380.832	313.776	338.533	392.39	401.867	342.165	413.868
Abt1	205.799	0.493038	1.40741	0.139784	3.52716	0.00042005	0.0061683	153.924	152.527	193.651	183.41	234.557	276.476	210.766	241.078
Abtb1	176.021	-0.21251	0.863034	0.151934	-1.3987	0.161902	0.381708	155.936	174.872	233.002	192.535	165.505	154.169	179.019	153.131
Abtb2	116.067	0.382697	1.30378	0.197014	1.94249	0.0520778	0.189702	92.5556	116.581	88.023	104.936	166.601	132.585	91.7143	135.542
AC025794.2	1.61695	1.23034	2.34622	1.34215	0.916695	0.359303	NA	0	2.91453	0	0.912488	2.19212	3.08338	1.76374	2.06934
AC026385.1	3.1554	0.64347	1.56208	1.05123	0.612114	0.540462	NA	1.00604	1.94302	4.14226	2.73747	2.19212	11.3057	0.881868	1.03467
AC061963.1	16.1984	0.136693	1.09938	0.48664	0.280891	0.778794	0.895323	9.05435	9.71509	32.1025	10.9499	23.0173	14.3891	15.8736	14.4854
AC079441.1	4.34234	-0.954962	0.515855	0.92708	-1.03007	0.302975	NA	4.02416	10.6866	0	8.2124	3.28818	3.08338	4.40934	1.03467
AC090479.2	58.8671	-0.463308	0.725321	0.256989	-1.80283	0.0714147	0.232214	78.4711	52.4615	54.885	86.6864	52.6109	64.7509	39.6841	41.3868
AC090881.3	2.56553	0.426047	1.34355	1.06286	0.400849	0.688531	NA	1.00604	1.94302	3.1067	2.73747	4.38424	2.05559	5.29121	0
AC093020.1	43.1544	0.0800447	1.05705	0.262379	0.305073	0.760311	0.885964	43.2597	51.49	36.2448	36.4995	50.4188	51.3896	33.511	42.4215
AC096777.1	5.29246	-0.327387	0.796979	0.759631	-0.430982	0.666482	NA	13.0785	2.91453	3.1067	4.56244	2.19212	5.13896	6.17308	5.17335
AC098733.1	1.3875	-2.13356	0.227895	1.78531	-1.19506	0.232063	NA	1.00604	0	6.21339	1.82498	0	2.05559	0	0
AC098880.1	4.78374	0.513906	1.42791	0.754452	0.681165	0.495767	NA	4.02416	3.88604	4.14226	3.64995	7.67242	2.05559	3.52747	9.31204
AC098880.2	192.381	0.460112	1.37565	0.127388	3.61191	0.000303952	0.00481553	160.966	144.755	172.939	168.81	240.037	222.003	208.121	221.42
AC099605.1	1.48803	-1.6194	0.325471	1.58925	-1.01897	0.308217	NA	1.00604	0	6.21339	1.82498	1.09606	0	1.76374	0
AC100751.1	13.3284	0.680214	1.60238	0.619002	1.09889	0.271817	0.520737	15.0906	16.5157	4.14226	5.47493	8.76848	9.25013	37.0385	10.3467
AC102055.1	7.90703	0.913184	1.8832	0.793791	1.15041	0.249975	NA	0	3.88604	4.14226	13.6873	19.7291	5.13896	5.29121	11.3814
AC102106.1	4.70484	0.614899	1.53145	0.834292	0.737031	0.461103	NA	3.01812	1.94302	6.21339	3.64995	4.38424	6.16676	0.881868	11.3814
AC102268.2	7.05959	0.0407268	1.02863	0.932984	0.0436522	0.965182	NA	8.04831	11.6581	0	8.2124	3.28818	10.2779	14.9918	0
AC102496.1	129.771	-1.32117	0.400211	0.174457	-7.57304	3.64595e-14	1.07824e-11	198.19	150.584	182.259	210.785	77.8203	71.9455	85.5412	61.0456
AC102618.1	4.69898	1.29834	2.45945	0.818993	1.58528	0.112902	NA	2.01208	3.88604	3.1067	1.82498	14.2488	3.08338	5.29121	4.13868
AC104328.1	94.265	-0.0703048	0.952437	0.222037	-0.316636	0.75152	0.880788	114.688	91.3219	74.5607	104.936	112.894	74.0011	67.9038	113.814
AC106834.1	1.92465	-0.0389385	0.973371	1.31353	-0.0296442	0.976351	NA	5.0302	0	1.03557	1.82498	0	1.02779	4.40934	2.06934
AC107768.1	28.0292	0.787309	1.72585	0.307666	2.55897	0.0104982	0.0634293	20.1208	21.3732	19.6757	20.9872	41.6503	27.7504	34.3928	38.2828
AC107768.2	3.74586	1.24778	2.37476	0.946987	1.31764	0.187626	NA	1.00604	5.82906	2.07113	0	7.67242	4.11117	6.17308	3.10401
AC107792.3	37.5396	0.43831	1.35502	0.332503	1.31821	0.187432	0.416173	36.2174	24.2877	15.5335	51.0993	42.7463	45.2229	39.6841	45.5255
AC109138.11	3.6864	0.429911	1.34715	0.885274	0.485625	0.627233	NA	4.02416	2.91453	1.03557	4.56244	3.28818	8.22234	4.40934	1.03467
AC109138.4	3.6827	0.0476963	1.03361	1.16858	0.0408155	0.967443	NA	2.01208	9.71509	1.03557	1.82498	0	0	9.70055	5.17335
AC109138.8	1.38423	0.850336	1.80292	1.48494	0.572639	0.566889	NA	0	2.91453	1.03557	0	1.09606	4.11117	0.881868	1.03467
AC109152.1	9.44203	0.129653	1.09403	0.565297	0.229354	0.818594	NA	13.0785	5.82906	7.24896	10.0374	3.28818	13.3613	12.3462	10.3467
AC109261.3	1.7442	0.932663	1.9088	1.61215	0.57852	0.562913	NA	3.01812	0	0	1.82498	0	2.05559	7.05494	0
AC109261.4	6.13284	1.08564	2.12232	0.654939	1.65762	0.0973933	NA	4.02416	3.88604	4.14226	3.64995	6.57636	12.3335	6.17308	8.27737
AC109619.1	88.4807	-0.0159255	0.989022	0.210349	-0.0757096	0.93965	0.97319	87.5254	74.8062	120.126	73.9116	70.1479	96.6125	86.4231	98.2937
AC110206.1	2.32699	-0.0849768	0.9428	1.11598	-0.0761456	0.939303	NA	3.01812	1.94302	0	4.56244	4.38424	1.02779	2.6456	1.03467
AC110212.1	7.66543	0.406373	1.32535	0.61729	0.658319	0.510333	NA	3.01812	3.88604	10.3557	9.12488	10.9606	8.22234	10.5824	5.17335
AC110375.1	3.66419	-0.680056	0.624141	0.954717	-0.712311	0.476272	NA	3.01812	5.82906	8.28452	0.912488	1.09606	3.08338	0.881868	6.20802
AC110730.1	5.09016	-0.895946	0.537395	1.03616	-0.864683	0.387213	NA	0	5.82906	4.14226	16.4248	1.09606	10.2779	0.881868	2.06934
AC110913.1	1.79322	1.95247	3.87037	1.40321	1.39143	0.164094	NA	1.00604	0.971509	1.03557	0	0	2.05559	6.17308	3.10401
AC111023.1	1.92582	1.48347	2.7962	1.31439	1.12864	0.259051	NA	1.00604	0	3.1067	0	4.38424	4.11117	1.76374	1.03467
AC113003.1	2.41528	-0.442182	0.736021	1.16687	-0.378947	0.704727	NA	4.02416	0	6.21339	0.912488	1.09606	2.05559	0.881868	4.13868
AC113485.1	1.71389	-0.00938886	0.993513	1.32248	-0.00709944	0.994336	NA	0	2.91453	3.1067	0.912488	0	1.02779	2.6456	3.10401
AC113528.1	13.9386	0.344988	1.27014	0.422774	0.816011	0.414494	0.652751	9.05435	13.6011	15.5335	10.9499	16.4409	15.4169	14.9918	15.5201
AC113540.1	62.3337	0.087662	1.06265	0.223551	0.392135	0.694959	0.849469	63.3805	55.376	71.454	52.0118	55.8991	78.1122	69.6676	52.7682
AC113961.2	1.3561	-0.287525	0.819306	1.73209	-0.165998	0.868158	NA	5.0302	0.971509	0	0	0	3.08338	1.76374	0
AC114539.1	25.1795	-0.178104	0.883864	0.393803	-0.452267	0.651077	0.822051	25.151	26.2308	13.4623	41.9745	17.537	33.9172	25.5742	17.5894
AC114990.1	13.7247	-0.321066	0.800478	0.52059	-0.616735	0.537409	0.746281	16.0966	18.4587	5.17783	20.9872	17.537	6.16676	8.81868	16.5547
AC115117.1	6.31761	-0.138655	0.908366	0.620015	-0.223631	0.823044	NA	7.04227	3.88604	8.28452	7.29991	5.4803	6.16676	6.17308	6.20802
AC115117.2	4.02333	0.842976	1.79375	0.961289	0.876923	0.380529	NA	0	0.971509	4.14226	6.38742	1.09606	5.13896	6.17308	8.27737
AC115119.1	2.94137	0.811747	1.75534	1.09091	0.744098	0.456817	NA	0	0	2.07113	6.38742	3.28818	3.08338	3.52747	5.17335
AC115631.1	12.8419	-0.301802	0.811239	0.462435	-0.652635	0.513991	0.730614	17.1027	18.4587	9.32009	11.8623	13.1527	7.19455	13.228	12.416
AC115752.1	8.15874	-0.0133412	0.990795	0.583733	-0.0228549	0.981766	NA	12.0725	7.77207	9.32009	3.64995	8.76848	11.3057	6.17308	6.20802
AC116489.2	10.5305	0.558824	1.47307	0.551422	1.01342	0.310858	0.560976	13.0785	5.82906	4.14226	10.9499	9.86454	8.22234	11.4643	20.6934
AC116841.1	1.53248	1.09383	2.1344	1.44294	0.758055	0.448418	NA	1.00604	0	1.03557	1.82498	2.19212	1.02779	0	5.17335
AC117239.1	4.55688	-0.800748	0.574051	0.820943	-0.9754	0.329362	NA	6.03624	2.91453	3.1067	10.9499	3.28818	5.13896	0.881868	4.13868
AC117239.2	21.5262	0.255015	1.19335	0.366617	0.695591	0.486685	0.710062	14.0845	24.2877	22.7824	17.3373	21.9212	32.8894	20.283	18.6241
AC118542.1	1.68729	1.80103	3.48468	1.51988	1.18498	0.236025	NA	3.01812	0	0	0	5.4803	3.08338	0.881868	1.03467
AC118632.1	3.9593	0.576944	1.49169	0.82769	0.697053	0.48577	NA	4.02416	1.94302	3.1067	3.64995	6.57636	1.02779	6.17308	5.17335
AC118724.1	6.16103	-0.0757438	0.948853	0.771517	-0.0981752	0.921793	NA	3.01812	4.85755	8.28452	9.12488	3.28818	14.3891	5.29121	1.03467
AC118724.2	2.75852	-0.487089	0.713463	1.12122	-0.434429	0.663977	NA	3.01812	7.77207	2.07113	0	1.09606	2.05559	0.881868	5.17335
AC119982.1	1.93951	-1.54418	0.342891	1.39152	-1.10971	0.267126	NA	0	1.94302	4.14226	5.47493	2.19212	0	1.76374	0
AC121603.1	1.96482	-1.09703	0.467477	1.16283	-0.943419	0.345467	NA	2.01208	1.94302	3.1067	3.64995	0	2.05559	0.881868	2.06934
AC121603.3	3.09545	-2.40422	0.188911	1.12587	-2.13543	0.0327258	NA	4.02416	2.91453	10.3557	3.64995	0	2.05559	1.76374	0
AC121783.1	3.83922	-0.580249	0.668849	0.930096	-0.623859	0.53272	NA	5.0302	2.91453	5.17783	5.47493	1.09606	3.08338	7.93681	0
AC121821.1	105.4	0.394075	1.3141	0.217975	1.80789	0.0706236	0.230762	69.4167	121.439	74.5607	98.5487	117.278	156.224	108.47	97.2591
AC121821.3	4.18576	-0.465124	0.724409	0.887165	-0.524282	0.600083	NA	1.00604	0.971509	8.28452	9.12488	4.38424	3.08338	3.52747	3.10401
AC121957.1	13.4785	-1.4132	0.375478	0.497773	-2.83904	0.00452495	0.0348298	23.1389	14.5726	26.9247	13.6873	8.76848	11.3057	5.29121	4.13868
AC121967.1	70.1535	-0.177021	0.884528	0.200149	-0.884446	0.376456	0.621478	86.5194	69.9487	72.4896	69.3491	59.1872	60.6398	75.8406	67.2536
AC122119.2	4.18069	-0.208802	0.865255	0.823642	-0.253511	0.799873	NA	3.01812	2.91453	8.28452	3.64995	4.38424	5.13896	0.881868	5.17335
AC122253.2	29.4247	-0.114916	0.923436	0.354678	-0.324001	0.745938	0.877915	21.1268	36.9174	22.7824	41.062	35.0739	37.0005	17.6374	23.7974
AC122398.2	3.7205	2.04177	4.11752	1.11136	1.83719	0.0661815	NA	2.01208	2.91453	0	0.912488	4.38424	7.19455	12.3462	0
AC122442.1	17.7234	0.148976	1.10878	0.489847	0.304127	0.761031	0.886317	25.151	8.74358	14.4979	19.1623	13.1527	9.25013	35.2747	16.5547
AC122453.1	174.038	-0.256358	0.837199	0.150503	-1.70334	0.0885053	0.265705	191.147	217.618	146.015	202.572	154.544	153.141	153.445	173.825
AC122481.1	5.60191	0.472535	1.38755	0.750724	0.629439	0.529061	NA	3.01812	4.85755	6.21339	4.56244	8.76848	6.16676	0.881868	10.3467
AC122481.2	4.17898	0.150644	1.11006	0.837986	0.179769	0.857334	NA	4.02416	2.91453	5.17783	3.64995	7.67242	7.19455	1.76374	1.03467
AC122487.1	5.13634	-0.340755	0.789628	0.877665	-0.388252	0.69783	NA	0	5.82906	5.17783	11.8623	6.57636	1.02779	4.40934	6.20802
AC122846.1	7.00754	-0.951177	0.51721	0.69034	-1.37784	0.168253	NA	7.04227	9.71509	8.28452	11.8623	3.28818	11.3057	3.52747	1.03467
AC122861.1	30.8904	-0.37161	0.772919	0.314178	-1.1828	0.236887	0.480358	31.1872	33.0313	24.8536	50.1869	26.3054	23.6392	29.9835	27.9361
AC122861.4	8.33861	-0.442178	0.736023	0.684767	-0.645735	0.518451	NA	8.04831	10.6866	5.17783	14.5998	3.28818	1.02779	11.4643	12.416
AC122895.1	2.05786	0.403575	1.32278	1.3503	0.298879	0.765032	NA	3.01812	0.971509	3.1067	0	1.09606	1.02779	0	7.2427
AC122898.1	74.7522	1.96894	3.9148	0.269594	7.30336	2.80673e-13	6.95781e-11	39.2355	35.9458	33.1381	13.6873	129.335	135.669	89.9505	121.056
AC123659.1	1.33051	-2.0825	0.236104	1.57686	-1.32066	0.186613	NA	2.01208	0.971509	1.03557	4.56244	0	1.02779	0	1.03467
AC123853.1	5.17251	0.588658	1.50385	0.786416	0.748532	0.45414	NA	3.01812	0	6.21339	7.29991	4.38424	6.16676	7.05494	7.2427
AC123927.1	23.8904	0.613255	1.52971	0.431075	1.42262	0.154847	0.371884	8.04831	33.0313	19.6757	14.5998	39.4582	22.6114	18.5192	35.1788
AC123927.2	72.0875	0.223271	1.16738	0.230559	0.96839	0.33285	0.581089	69.4167	47.604	92.1653	57.4868	70.1479	83.2512	87.3049	69.3229
AC123927.3	55.9439	-0.101337	0.932168	0.227788	-0.444875	0.65641	0.825384	53.3201	48.5755	66.2762	63.8742	47.1306	52.4174	65.2582	50.6989
AC123951.1	4.10816	0.593805	1.50922	1.01326	0.586033	0.557853	NA	10.0604	0.971509	2.07113	0	7.67242	3.08338	1.76374	7.2427
AC124108.1	162.683	0.611384	1.52772	0.153166	3.99164	6.56186e-05	0.0015029	148.894	99.094	143.944	123.186	211.54	195.281	192.247	187.275
AC124169.1	25.8672	-0.173803	0.886503	0.363656	-0.477932	0.632699	0.810934	30.1812	36.9174	13.4623	29.1996	19.7291	19.5281	29.9835	27.9361
AC124459.1	2.82121	-0.876487	0.544692	1.06608	-0.822161	0.410985	NA	5.0302	5.82906	1.03557	2.73747	0	5.13896	1.76374	1.03467
AC124466.1	1.97613	-2.05915	0.239957	1.44362	-1.42638	0.153759	NA	6.03624	4.85755	0	1.82498	0	2.05559	0	1.03467
AC124502.1	9.67992	-0.210687	0.864126	0.65732	-0.320524	0.748572	0.879105	3.01812	10.6866	18.6402	9.12488	8.76848	18.5003	3.52747	5.17335
AC124502.3	1.70704	1.37669	2.59672	1.34023	1.02721	0.304324	NA	1.00604	0	0	2.73747	3.28818	1.02779	3.52747	2.06934
AC124502.4	2.23419	-0.632757	0.644943	1.16345	-0.543861	0.586537	NA	4.02416	5.82906	1.03557	0	1.09606	2.05559	1.76374	2.06934
AC124502.5	2.45391	-0.266923	0.83109	1.05624	-0.252709	0.800493	NA	3.01812	0.971509	3.1067	3.64995	3.28818	0	3.52747	2.06934
AC124512.1	36.0134	0.00497322	1.00345	0.294774	0.0168713	0.986539	0.994444	46.2778	40.8034	32.1025	24.6372	33.9779	33.9172	30.8654	45.5255
AC124513.1	119.893	-0.227431	0.854155	0.167646	-1.35661	0.174906	0.399132	131.791	126.296	134.623	125.011	121.663	84.279	127.871	107.606
AC124740.2	1.62283	1.78135	3.43749	1.50152	1.18637	0.235476	NA	0	2.91453	0	0	1.09606	5.13896	1.76374	2.06934
AC125059.1	15.9104	-0.875084	0.545222	0.509879	-1.71626	0.0861148	0.260521	21.1268	13.6011	36.2448	11.8623	7.67242	9.25013	20.283	7.2427
AC125059.3	4.59463	0.651409	1.5707	0.896036	0.72699	0.467232	NA	1.00604	5.82906	0	7.29991	8.76848	3.08338	3.52747	7.2427
AC125059.4	3.71053	-0.159842	0.895123	0.919631	-0.173811	0.862014	NA	5.0302	1.94302	4.14226	4.56244	0	3.08338	2.6456	8.27737
AC125110.1	6.56477	0.774983	1.71117	0.685625	1.13033	0.258337	NA	7.04227	6.80057	1.03557	4.56244	4.38424	8.22234	13.228	7.2427
AC125456.1	13.4634	0.146357	1.10677	0.492841	0.296965	0.766493	0.88827	10.0604	12.6296	8.28452	20.0747	19.7291	9.25013	19.4011	8.27737
AC126254.1	1.39921	0.314891	1.24392	1.91796	0.16418	0.869589	NA	0	2.91453	2.07113	0	0	0	0	6.20802
AC126254.3	1.53352	-0.991962	0.502794	1.54387	-0.642516	0.520538	NA	4.02416	0	4.14226	0	2.19212	1.02779	0.881868	0
AC126686.1	3.01994	-0.960217	0.51398	0.954878	-1.00559	0.314612	NA	5.0302	3.88604	5.17783	1.82498	2.19212	1.02779	0.881868	4.13868
AC126695.1	2.90681	-0.322786	0.799524	1.03476	-0.311943	0.755084	NA	3.01812	1.94302	5.17783	2.73747	3.28818	0	0.881868	6.20802
AC126807.1	4.67942	1.28626	2.43895	0.818002	1.57244	0.115848	NA	2.01208	4.85755	3.1067	0.912488	7.67242	3.08338	4.40934	11.3814
AC126937.1	1.63799	0.279047	1.21339	1.36498	0.204433	0.838015	NA	2.01208	3.88604	0	0	2.19212	1.02779	0.881868	3.10401
AC126937.2	57.8804	-0.319988	0.801076	0.242793	-1.31794	0.187522	0.416173	77.465	77.7207	42.4582	59.3117	49.3227	56.5286	48.5027	51.7335
AC126942.2	1.35507	-0.17805	0.883897	1.55003	-0.114869	0.908549	NA	0	3.88604	0	1.82498	2.19212	2.05559	0.881868	0
AC126944.1	5.17411	0.169605	1.12475	0.79427	0.213535	0.83091	NA	5.0302	5.82906	5.17783	3.64995	1.09606	2.05559	12.3462	6.20802
AC127256.1	3.76794	0.477778	1.3926	0.966447	0.494365	0.621048	NA	0	8.74358	2.07113	1.82498	2.19212	3.08338	7.05494	5.17335
AC127331.2	3.81945	-0.0715914	0.951588	0.892303	-0.0802321	0.936053	NA	0	3.88604	7.24896	4.56244	2.19212	3.08338	4.40934	5.17335
AC127342.1	3.032	0.78646	1.72484	0.976721	0.805204	0.420702	NA	2.01208	0	4.14226	2.73747	3.28818	5.13896	1.76374	5.17335
AC129179.2	1.51431	-0.499383	0.707409	1.50824	-0.331104	0.740566	NA	4.02416	0	3.1067	0	2.19212	1.02779	1.76374	0
AC130204.1	2.80403	-0.879354	0.543611	1.12345	-0.782729	0.433786	NA	8.04831	0	1.03557	5.47493	1.09606	1.02779	2.6456	3.10401
AC130718.1	1.92115	0.682221	1.60461	1.28968	0.528983	0.596817	NA	0	1.94302	2.07113	1.82498	4.38424	4.11117	0	1.03467
AC130718.2	32.2893	0.144335	1.10522	0.29396	0.491003	0.623424	0.805292	39.2355	20.4017	32.1025	31.0246	33.9779	33.9172	33.511	34.1441
AC131065.2	2.02852	-0.260033	0.835069	1.27729	-0.203582	0.83868	NA	0	4.85755	2.07113	1.82498	4.38424	2.05559	0	1.03467
AC131065.4	13.1231	0.0493493	1.0348	0.471682	0.104624	0.916674	0.963505	17.1027	6.80057	11.3912	16.4248	9.86454	15.4169	17.6374	10.3467
AC131185.2	13.7363	-0.45179	0.731135	0.447419	-1.00977	0.312606	0.562495	21.1268	11.6581	11.3912	19.1623	15.3448	10.2779	10.5824	10.3467
AC131675.3	2.11049	-0.385086	0.765733	1.37726	-0.279602	0.779783	NA	4.02416	2.91453	0	2.73747	0	0	6.17308	1.03467
AC131692.1	30.5878	-0.625486	0.648201	0.391764	-1.59659	0.110357	0.304467	46.2778	56.3475	18.6402	27.3747	23.0173	13.3613	31.7472	27.9361
AC131712.1	9.78506	-0.166062	0.891272	0.569294	-0.291698	0.770517	0.890327	9.05435	7.77207	13.4623	10.9499	18.633	4.11117	7.05494	7.2427
AC132100.1	3.12172	0.359845	1.28329	0.962539	0.37385	0.708516	NA	7.04227	0.971509	2.07113	0.912488	2.19212	3.08338	3.52747	5.17335
AC132253.4	8.6212	-2.03993	0.243176	0.748405	-2.7257	0.00641655	NA	7.04227	23.3162	6.21339	19.1623	0	4.11117	7.05494	2.06934
AC132253.6	64.5146	0.0225487	1.01575	0.214158	0.10529	0.916146	0.963409	54.3261	67.0341	59.0272	75.7365	58.0912	70.9177	74.0769	56.9069
AC132253.8	23.7524	-0.258343	0.836047	0.379296	-0.681112	0.4958	0.716901	37.2235	30.1168	13.4623	22.8122	21.9212	15.4169	27.3379	21.7281
AC132253.9	6.39311	0.569145	1.48364	0.638371	0.891558	0.37263	NA	4.02416	7.77207	4.14226	4.56244	7.67242	9.25013	4.40934	9.31204
AC132288.2	3.61796	1.19776	2.29384	1.02333	1.17045	0.241818	NA	4.02416	0.971509	1.03557	2.73747	4.38424	0	4.40934	11.3814
AC132307.1	288.158	-0.217181	0.860245	0.117741	-1.84457	0.0651008	0.219606	357.144	273.966	307.563	301.121	254.286	250.781	276.907	283.5
AC132307.3	31.8512	-0.0815979	0.94501	0.365354	-0.223339	0.823272	0.917783	47.2838	22.3447	37.2803	24.6372	21.9212	34.945	46.739	19.6587
AC132307.5	15.0861	-0.256962	0.836848	0.466159	-0.551233	0.581474	0.77682	21.1268	11.6581	18.6402	14.5998	13.1527	6.16676	22.9286	12.416
AC132351.1	7.77765	0.255998	1.19416	0.673708	0.379983	0.703958	NA	6.03624	15.5441	2.07113	4.56244	12.0567	7.19455	4.40934	10.3467
AC132378.1	1.43776	-0.0774456	0.947734	1.55329	-0.0498592	0.960235	NA	3.01812	1.94302	1.03557	0	1.09606	0	4.40934	0
AC132452.2	2.87748	-1.80731	0.285723	1.11068	-1.62721	0.103692	NA	3.01812	2.91453	8.28452	3.64995	0	3.08338	0	2.06934
AC132455.1	3.33233	1.18651	2.27601	1.20418	0.985325	0.324465	NA	3.01812	0	5.17783	0	8.76848	6.16676	3.52747	0
AC132460.2	28.1635	-0.578016	0.669884	0.373793	-1.54636	0.122019	0.322994	27.1631	33.0313	33.1381	41.062	27.4015	21.5836	8.81868	33.1095
AC132481.1	18.4297	-0.241202	0.84604	0.480256	-0.502237	0.615501	0.800764	30.1812	18.4587	8.28452	22.8122	25.2094	19.5281	16.7555	6.20802
AC132481.2	36.8365	0.00833165	1.00579	0.283655	0.0293725	0.976568	0.98961	28.1691	42.7464	42.4582	33.7621	27.4015	34.945	39.6841	45.5255
AC132910.1	7.76152	0.55503	1.4692	0.746544	0.743466	0.457199	NA	9.05435	4.85755	2.07113	9.12488	1.09606	20.5559	7.05494	8.27737
AC132911.2	5.855	-0.931619	0.52427	0.698389	-1.33396	0.182219	NA	9.05435	10.6866	8.28452	2.73747	5.4803	3.08338	4.40934	3.10401
AC132957.1	12.658	-0.493926	0.71009	0.621731	-0.794436	0.426941	0.662563	3.01812	11.6581	22.7824	21.8997	8.76848	3.08338	17.6374	12.416
AC133451.1	36.7749	-0.323543	0.799105	0.368554	-0.877872	0.380013	0.624416	59.3563	30.1168	21.7469	52.0118	39.4582	19.5281	26.456	45.5255
AC133451.2	1.64317	-1.1236	0.458947	1.47239	-0.763113	0.445396	NA	3.01812	3.88604	2.07113	0	3.28818	0	0.881868	0
AC133509.1	133.351	0.412388	1.33089	0.147891	2.78845	0.00529604	0.0391387	121.731	109.781	122.197	104.024	160.025	142.863	143.744	162.443
AC133523.4	3.23678	-0.654518	0.635288	0.999331	-0.654956	0.512496	NA	5.0302	2.91453	5.17783	2.73747	0	1.02779	1.76374	7.2427
AC133601.1	9.43363	-0.738976	0.599165	0.536326	-1.37785	0.16825	NA	8.04831	14.5726	14.4979	10.0374	5.4803	7.19455	5.29121	10.3467
AC133941.1	1.77525	0.951609	1.93403	1.36938	0.694917	0.487107	NA	1.00604	1.94302	0	1.82498	2.19212	1.02779	0	6.20802
AC133968.1	6.19362	0.0542126	1.03829	0.702563	0.0771641	0.938493	NA	3.01812	8.74358	5.17783	7.29991	2.19212	10.2779	3.52747	9.31204
AC134458.1	3.758	1.25322	2.38373	0.865749	1.44756	0.147741	NA	3.01812	2.91453	2.07113	0.912488	4.38424	9.25013	4.40934	3.10401
AC134468.1	1.65459	1.28865	2.44299	1.4474	0.890317	0.373296	NA	0	1.94302	0	1.82498	3.28818	4.11117	0	2.06934
AC134546.1	16.0584	-0.747006	0.595839	0.505812	-1.47685	0.139717	0.348919	19.1147	6.80057	30.0314	24.6372	9.86454	6.16676	13.228	18.6241
AC134563.1	3.17682	0.250554	1.18966	0.953438	0.26279	0.792713	NA	0	4.85755	3.1067	3.64995	4.38424	2.05559	5.29121	2.06934
AC134830.2	15.2063	-0.191739	0.87555	0.458791	-0.417923	0.676004	0.837835	11.0664	17.4872	22.7824	13.6873	9.86454	22.6114	15.8736	8.27737
AC134906.1	7.09655	-0.23814	0.847838	0.636792	-0.373968	0.708428	NA	9.05435	7.77207	10.3557	3.64995	3.28818	11.3057	6.17308	5.17335
AC135509.1	7.64614	-0.25693	0.836867	0.570683	-0.450214	0.652556	NA	11.0664	5.82906	8.28452	8.2124	6.57636	5.13896	8.81868	7.2427
AC137150.1	1.77131	-0.442357	0.735931	1.41175	-0.313339	0.754023	NA	0	0.971509	7.24896	0	1.09606	2.05559	1.76374	1.03467
AC137605.4	50.3658	0.159646	1.11701	0.272845	0.585116	0.55847	0.760738	59.3563	52.4615	39.3515	39.237	59.1872	31.8616	57.3214	64.1496
AC137853.1	3.15209	0.873457	1.83205	1.27581	0.684631	0.493577	NA	1.00604	5.82906	2.07113	0	1.09606	0	1.76374	13.4507
AC138768.2	27.3816	0.845661	1.79709	0.340436	2.48405	0.0129897	0.0734543	21.1268	15.5441	18.6402	22.8122	36.17	26.7226	27.3379	50.6989
AC138790.1	10.6548	0.143784	1.1048	0.562902	0.255434	0.798388	0.904974	7.04227	8.74358	6.21339	18.2498	8.76848	16.4447	5.29121	14.4854
AC139296.1	2.24995	1.00872	2.01213	1.12605	0.895805	0.370357	NA	4.02416	0.971509	1.03557	0	3.28818	3.08338	3.52747	2.06934
AC140278.1	15.1547	0.527008	1.44094	0.445852	1.18202	0.237196	0.480636	12.0725	10.6866	20.7113	6.38742	19.7291	19.5281	17.6374	14.4854
AC140336.1	4.39659	0.968182	1.95637	0.858233	1.12811	0.259273	NA	6.03624	0.971509	3.1067	1.82498	2.19212	11.3057	3.52747	6.20802
AC140336.2	1.39383	0.38153	1.30272	1.55957	0.244638	0.806736	NA	1.00604	0	1.03557	2.73747	3.28818	3.08338	0	0
AC140413.1	3.36805	0.560152	1.47442	1.0471	0.534957	0.592679	NA	5.0302	0.971509	4.14226	0.912488	0	3.08338	9.70055	3.10401
AC141471.1	5.03779	0.0587183	1.04154	0.926603	0.0633695	0.949472	NA	0	11.6581	6.21339	1.82498	4.38424	4.11117	1.76374	10.3467
AC141471.3	1.32936	-2.98103	0.126654	1.70998	-1.74332	0.0812781	NA	0	3.88604	2.07113	3.64995	0	1.02779	0	0
AC142100.3	5.61594	-0.997548	0.500851	0.83953	-1.18822	0.234746	NA	6.03624	13.6011	2.07113	8.2124	0	8.22234	2.6456	4.13868
AC142448.2	11.8881	0.826122	1.77291	0.497353	1.66104	0.096706	0.280725	12.0725	6.80057	6.21339	9.12488	13.1527	13.3613	10.5824	23.7974
AC144621.1	2.3747	0.522034	1.43598	1.14339	0.456565	0.647984	NA	3.01812	0.971509	1.03557	2.73747	1.09606	8.22234	0.881868	1.03467
AC144797.2	12.5621	-0.621598	0.64995	0.523897	-1.18649	0.235429	0.478468	15.0906	5.82906	20.7113	19.1623	16.4409	6.16676	8.81868	8.27737
AC144860.1	68.3997	0.344186	1.26943	0.206496	1.66679	0.0955553	0.278729	70.4227	61.2051	55.9205	53.8368	82.2045	63.7231	86.4231	73.4616
AC144860.2	3.37732	0.662164	1.58245	1.09037	0.607286	0.543661	NA	3.01812	1.94302	0	5.47493	6.57636	0	7.93681	2.06934
AC144860.4	12.8939	0.117418	1.08479	0.524604	0.223823	0.822895	0.917648	12.0725	10.6866	8.28452	18.2498	15.3448	23.6392	9.70055	5.17335
AC147234.2	2.46468	-0.921313	0.528028	1.37285	-0.671095	0.50216	NA	0	0	9.32009	3.64995	2.19212	1.02779	3.52747	0
AC148013.1	18.0056	0.532124	1.44606	0.399506	1.33195	0.182875	0.409882	10.0604	17.4872	18.6402	12.7748	25.2094	22.6114	23.8104	13.4507
AC148019.1	1.51546	4.06993	16.7947	1.64127	2.47975	0.0131473	NA	0	0	0	0	1.09606	7.19455	1.76374	2.06934
AC148019.2	6.13003	2.66939	6.36161	0.896974	2.976	0.00292039	NA	0	1.94302	0	4.56244	5.4803	18.5003	12.3462	6.20802
AC148019.3	5.14046	1.8718	3.65988	0.921625	2.03097	0.0422578	NA	0	2.91453	3.1067	2.73747	8.76848	7.19455	0.881868	15.5201
AC148020.1	10.4136	-0.307536	0.808021	0.521117	-0.590148	0.555091	0.758465	10.0604	10.6866	13.4623	11.8623	4.38424	10.2779	7.05494	15.5201
AC148174.1	5.88083	-1.63651	0.321634	0.811025	-2.01783	0.0436094	NA	11.0664	9.71509	4.14226	10.9499	0	3.08338	7.05494	1.03467
AC149224.1	1.53982	0.0137627	1.00959	1.39837	0.009842	0.992147	NA	2.01208	0	4.14226	0	2.19212	2.05559	0.881868	1.03467
AC151294.1	1.90622	0.0335122	1.0235	1.29047	0.025969	0.979282	NA	0	3.88604	0	3.64995	1.09606	2.05559	3.52747	1.03467
AC152396.2	1.95154	-0.383787	0.766423	1.21767	-0.315181	0.752624	NA	5.0302	0	2.07113	1.82498	1.09606	1.02779	3.52747	1.03467
AC153131.1	1.48985	0.0488122	1.03441	1.39006	0.0351153	0.971988	NA	2.01208	2.91453	0	0.912488	3.28818	1.02779	1.76374	0
AC154200.1	1.8648	-2.69275	0.154669	1.44932	-1.85794	0.0631781	NA	3.01812	0.971509	6.21339	2.73747	1.09606	0	0.881868	0
AC154232.1	5.43011	-0.563624	0.676601	0.734522	-0.767335	0.442883	NA	5.0302	8.74358	3.1067	9.12488	1.09606	4.11117	7.05494	5.17335
AC154291.1	2.4743	-1.22582	0.427555	1.19689	-1.02417	0.305755	NA	7.04227	0	4.14226	2.73747	2.19212	0	2.6456	1.03467
AC154366.4	2.00416	3.66059	12.6458	1.57146	2.32941	0.0198373	NA	1.00604	0	0	0	0	5.13896	2.6456	7.2427
AC154442.1	2.1824	-0.339114	0.790527	1.32582	-0.255777	0.798123	NA	1.00604	7.77207	1.03557	0	0	3.08338	3.52747	1.03467
AC154486.3	183.719	0.0303274	1.02124	0.173204	0.175096	0.861004	0.937519	146.882	182.644	247.5	150.561	175.37	210.698	178.137	177.963
AC154492.2	62.6022	0.331975	1.25874	0.225972	1.4691	0.141806	0.351999	53.3201	52.4615	49.7071	65.6992	67.9557	86.3346	52.9121	72.427
AC154542.1	40.341	-0.927348	0.525824	0.291473	-3.18159	0.0014647	0.0155383	40.2416	66.0626	65.2406	40.1495	30.6897	27.7504	30.8654	21.7281
AC154544.1	3.62268	1.97282	3.92534	1.01894	1.93614	0.0528501	NA	4.02416	0	1.03557	0.912488	3.28818	3.08338	11.4643	5.17335
AC154652.2	11.2434	-0.420295	0.747272	0.494305	-0.850274	0.395173	0.637152	9.05435	11.6581	14.4979	16.4248	5.4803	8.22234	13.228	11.3814
AC154659.1	5.23283	-1.30301	0.405279	0.753347	-1.72963	0.0836964	NA	10.0604	8.74358	8.28452	2.73747	4.38424	2.05559	3.52747	2.06934
AC154707.1	16.5472	0.479673	1.39443	0.450592	1.06454	0.287084	0.537886	11.0664	15.5441	18.6402	10.0374	17.537	12.3335	14.1099	33.1095
AC154766.4	5.95293	-0.308729	0.807353	0.682551	-0.452316	0.651042	NA	9.05435	6.80057	3.1067	7.29991	5.4803	9.25013	3.52747	3.10401
AC154779.4	1.43495	0.00937679	1.00652	1.41505	0.00662648	0.994713	NA	1.00604	0.971509	1.03557	2.73747	0	3.08338	2.6456	0
AC154912.3	62.481	-0.115078	0.923332	0.231203	-0.497735	0.618671	0.802041	68.4107	51.49	65.2406	74.824	64.6675	66.8065	67.022	41.3868
AC154912.5	15.7022	0.188886	1.13988	0.521458	0.362227	0.717182	0.861255	13.0785	29.1453	8.28452	8.2124	23.0173	7.19455	21.1648	15.5201
AC156546.1	63.9471	-0.324181	0.798752	0.223995	-1.44727	0.147822	0.361292	73.4409	68.0057	88.023	55.6618	50.4188	54.473	68.7857	52.7682
AC157548.1	3.03411	-0.417797	0.748567	1.22274	-0.341688	0.732586	NA	10.0604	0	1.03557	2.73747	4.38424	0	0.881868	5.17335
AC157784.1	1.78265	0.561542	1.47585	1.36804	0.41047	0.681461	NA	1.00604	3.88604	0	0.912488	1.09606	0	5.29121	2.06934
AC157931.1	12.4157	0.856951	1.81121	0.466112	1.83851	0.0659876	0.221364	11.0664	5.82906	8.28452	10.0374	20.8251	15.4169	12.3462	15.5201
AC158605.1	5.00286	1.07289	2.10364	0.883599	1.21423	0.224662	NA	8.04831	1.94302	1.03557	1.82498	8.76848	10.2779	0.881868	7.2427
AC158975.1	2.8183	0.368253	1.29079	1.06409	0.346073	0.729288	NA	4.02416	4.85755	1.03557	0	2.19212	4.11117	5.29121	1.03467
AC158975.2	76.3597	-0.799299	0.574628	0.240679	-3.32102	0.000896884	0.0108223	93.5617	93.2649	83.8808	117.711	36.17	44.1951	69.6676	72.427
AC158982.1	2.43777	0.331762	1.25855	1.09753	0.302281	0.762438	NA	3.01812	0	1.03557	4.56244	2.19212	1.02779	3.52747	4.13868
AC161166.1	4.59693	0.672124	1.59342	0.890931	0.754406	0.450605	NA	2.01208	0.971509	10.3557	0.912488	9.86454	4.11117	4.40934	4.13868
AC161438.1	3.50881	0.906537	1.87454	0.963643	0.940739	0.346838	NA	4.02416	3.88604	1.03557	0.912488	2.19212	6.16676	8.81868	1.03467
AC161456.1	2.58728	1.64629	3.13028	1.15514	1.42519	0.154102	NA	1.00604	1.94302	2.07113	0	8.76848	4.11117	1.76374	1.03467
AC161530.1	31.9766	-0.0494296	0.966318	0.326989	-0.151166	0.879845	0.947699	43.2597	24.2877	34.1736	28.2871	29.5936	26.7226	22.9286	46.5602
AC162182.1	2.12528	-2.34874	0.196318	1.49116	-1.5751	0.115233	NA	4.02416	4.85755	0	5.47493	0	0	2.6456	0
AC162182.3	3.64801	0.785042	1.72314	0.873587	0.898643	0.368843	NA	5.0302	2.91453	1.03557	1.82498	2.19212	4.11117	7.93681	4.13868
AC162923.1	1.39273	-1.39689	0.379746	1.52021	-0.91888	0.358158	NA	1.00604	0.971509	5.17783	0.912488	2.19212	0	0.881868	0
AC163101.1	7.77573	0.519857	1.43381	0.58721	0.8853	0.375995	NA	9.05435	2.91453	6.21339	7.29991	10.9606	10.2779	6.17308	9.31204
AC163101.2	4.84343	0.981741	1.97485	0.870258	1.1281	0.259276	NA	1.00604	3.88604	8.28452	0	4.38424	7.19455	8.81868	5.17335
AC163221.1	2.02356	-1.53686	0.344635	1.30255	-1.17988	0.238048	NA	2.01208	3.88604	5.17783	0.912488	1.09606	0	0	3.10401
AC163277.1	1.38752	0.48949	1.40395	1.70736	0.286694	0.774347	NA	0	0.971509	0	3.64995	0	0	4.40934	2.06934
AC163399.1	3.22619	-0.688007	0.620711	1.03376	-0.665539	0.505706	NA	2.01208	1.94302	9.32009	2.73747	1.09606	0	3.52747	5.17335
AC163635.1	1.91025	1.0229	2.032	1.2239	0.835772	0.403283	NA	1.00604	0.971509	3.1067	0	3.28818	4.11117	1.76374	1.03467
AC164009.1	5.94579	0.631589	1.54927	0.742439	0.850695	0.394939	NA	5.0302	10.6866	2.07113	0.912488	7.67242	6.16676	8.81868	6.20802
AC164106.1	2.26088	-1.76029	0.295189	1.36683	-1.28786	0.197793	NA	3.01812	0	7.24896	3.64995	3.28818	0	0.881868	0
AC164314.1	4.48149	-1.53614	0.344806	1.24027	-1.23856	0.215509	NA	20.1208	0	1.03557	5.47493	1.09606	0	0.881868	7.2427
AC164647.1	1.64691	-0.636612	0.643222	1.52094	-0.418564	0.675535	NA	1.00604	0	5.17783	1.82498	0	1.02779	0	4.13868
AC165075.1	1.38692	2.21383	4.63904	1.8291	1.21034	0.22615	NA	0	1.94302	0	0	0	1.02779	0.881868	7.2427
AC165087.1	2.81851	0.941783	1.9209	1.01042	0.932069	0.351301	NA	3.01812	0	1.03557	3.64995	2.19212	5.13896	4.40934	3.10401
AC165327.2	6.01688	0.470611	1.3857	0.765355	0.614892	0.538626	NA	3.01812	6.80057	2.07113	8.2124	1.09606	12.3335	5.29121	9.31204
AC165425.1	1.76708	-2.61278	0.163484	1.72978	-1.51047	0.130923	NA	7.04227	0	5.17783	0	0	0	0.881868	1.03467
AC165962.1	76.7087	-0.456057	0.728976	0.195007	-2.33868	0.0193521	0.0968871	99.5979	93.2649	79.7385	82.124	72.34	70.9177	60.8489	54.8376
AC166058.1	5.76533	0.102195	1.07341	0.788817	0.129555	0.896919	NA	6.03624	1.94302	6.21339	8.2124	3.28818	6.16676	13.228	1.03467
AC166164.1	5.04232	0.480082	1.39482	0.813786	0.589937	0.555233	NA	9.05435	3.88604	2.07113	1.82498	4.38424	12.3335	2.6456	4.13868
AC166172.1	1.69613	0.307621	1.23767	1.43146	0.214901	0.829845	NA	0	0.971509	4.14226	0.912488	5.4803	1.02779	0	1.03467
AC166172.3	5.74071	-0.382088	0.767326	0.761848	-0.501528	0.616	NA	8.04831	4.85755	11.3912	1.82498	1.09606	5.13896	5.29121	8.27737
AC166172.4	9.88672	-0.192849	0.874877	0.571697	-0.337327	0.735871	0.872947	7.04227	12.6296	15.5335	7.29991	6.57636	6.16676	17.6374	6.20802
AC166575.1	53.876	0.359702	1.28316	0.257682	1.39592	0.16274	0.383066	47.2838	32.0598	49.7071	59.3117	65.7636	56.5286	45.8571	74.4963
AC166748.1	6.02578	-0.710929	0.610927	0.72037	-0.986894	0.323695	NA	13.0785	3.88604	9.32009	3.64995	5.4803	7.19455	3.52747	2.06934
AC166748.2	3.21777	-0.76538	0.588298	1.30431	-0.58681	0.557331	NA	10.0604	0	5.17783	0.912488	5.4803	4.11117	0	0
AC166779.2	16.0956	0.194673	1.14446	0.413877	0.470363	0.638095	0.813952	11.0664	14.5726	22.7824	11.8623	15.3448	15.4169	21.1648	16.5547
AC166821.1	6.72283	1.45024	2.73254	1.01059	1.43504	0.151276	NA	1.00604	7.77207	0	5.47493	30.6897	2.05559	2.6456	4.13868
AC167363.1	5.4405	0.591675	1.507	0.844346	0.700749	0.48346	NA	6.03624	0.971509	2.07113	8.2124	2.19212	4.11117	4.40934	15.5201
AC168050.2	7.98983	0.568067	1.48254	0.602707	0.942526	0.345924	NA	5.0302	5.82906	9.32009	5.47493	12.0567	12.3335	3.52747	10.3467
AC168306.1	14.2192	0.0748989	1.05329	0.47027	0.159268	0.873458	0.94402	14.0845	5.82906	13.4623	21.8997	13.1527	19.5281	12.3462	13.4507
AC169509.1	3.46421	0.232353	1.17475	0.857433	0.270987	0.786401	NA	2.01208	3.88604	4.14226	2.73747	1.09606	5.13896	3.52747	5.17335
AC170998.1	7.36577	0.491193	1.40561	0.628866	0.781077	0.434757	NA	9.05435	2.91453	5.17783	7.29991	5.4803	13.3613	5.29121	10.3467
Acaa1a	281.417	0.114489	1.08259	0.104552	1.09504	0.2735	0.522698	288.733	267.165	254.749	270.097	300.32	292.921	286.607	290.742
Acaa1b	2.12006	-0.171005	0.888224	1.16199	-0.147166	0.883001	NA	1.00604	1.94302	5.17783	0.912488	2.19212	3.08338	2.6456	0
Acaa2	140.546	-0.0610071	0.958595	0.174998	-0.348616	0.727378	0.868433	135.815	135.04	170.868	133.223	144.68	113.057	173.728	117.952
Acaca	1912.25	-0.108322	0.927667	0.0724242	-1.49566	0.134743	0.341919	1807.85	2109.15	1938.58	2078.65	1876.46	1874.69	1728.46	1884.14
Acacb	34.2472	0.50315	1.4173	0.276425	1.8202	0.0687283	0.226989	27.1631	33.0313	25.8891	27.3747	36.17	44.1951	44.9753	35.1788
Acad10	23.2105	0.141022	1.10269	0.353298	0.39916	0.689775	0.845762	29.1751	23.3162	15.5335	20.0747	29.5936	28.7782	18.5192	20.6934
Acad11	77.5705	-0.533074	0.691081	0.215388	-2.47495	0.0133255	0.074851	71.4288	90.3504	120.126	84.8614	65.7636	62.6954	52.9121	72.427
Acad12	13.2279	-0.491347	0.711361	0.440939	-1.11432	0.265142	0.512263	12.0725	18.4587	18.6402	12.7748	9.86454	9.25013	12.3462	12.416
Acad8	205.562	0.108839	1.07836	0.147992	0.735436	0.462074	0.691573	218.311	189.444	164.655	218.085	241.133	176.78	200.184	235.905
Acad9	360.281	-0.193013	0.874777	0.108012	-1.78696	0.0739436	0.237422	369.216	392.49	418.368	358.608	324.434	302.171	376.558	340.407
Acadl	207.3	0.254877	1.19323	0.141757	1.79799	0.0721794	0.233941	192.153	204.017	196.757	164.248	190.714	204.531	256.624	249.356
Acadm	225.239	0.204453	1.15225	0.117772	1.73601	0.0825626	0.254574	185.111	213.732	217.469	220.822	231.269	248.726	241.632	243.148
Acads	239.675	0.272725	1.20809	0.128117	2.12872	0.0332774	0.141199	199.196	235.105	194.686	238.159	274.015	280.587	226.64	269.014
Acadsb	421.671	-0.230685	0.85223	0.150422	-1.53359	0.125131	0.327588	371.228	433.293	621.339	396.02	406.638	398.784	405.659	340.407
Acadvl	236.406	0.306973	1.23711	0.116034	2.64554	0.0081561	0.0531455	222.335	199.159	210.22	213.522	287.168	243.587	262.797	252.46
Acan	5.0427	2.03611	4.10139	0.986128	2.06476	0.0389461	NA	3.01812	4.85755	0	0	18.633	6.16676	3.52747	4.13868
Acap1	8.13868	-0.822751	0.565363	0.644331	-1.27691	0.201635	NA	19.1147	10.6866	6.21339	5.47493	10.9606	4.11117	4.40934	4.13868
Acap2	821.633	-0.0722999	0.951121	0.078978	-0.915444	0.359959	0.606162	809.862	884.073	856.412	819.415	816.565	793.456	854.53	738.755
Acap3	508.98	-0.392825	0.761637	0.126832	-3.09722	0.00195346	0.0189795	471.832	580.963	724.896	534.718	425.271	427.562	482.382	424.215
Acat1	620.566	-0.574405	0.671563	0.113742	-5.05009	4.41612e-07	2.5407e-05	686.119	699.487	891.622	694.404	473.498	503.618	568.805	446.978
Acat2	459.48	-0.181429	0.881829	0.103409	-1.75449	0.0793473	0.24809	506.038	500.327	422.511	524.681	416.503	394.672	468.272	442.839
Acat3	13.2973	0.248275	1.18779	0.501218	0.495343	0.620358	0.802889	7.04227	24.2877	7.24896	10.0374	13.1527	12.3335	16.7555	15.5201
Acbd3	743.296	0.0912915	1.06532	0.0868202	1.0515	0.293029	0.543156	687.125	701.43	738.358	751.89	802.316	822.234	766.343	676.675
Acbd4	16.5111	0.0522782	1.0369	0.438855	0.119124	0.905177	0.957534	10.0604	16.5157	24.8536	13.6873	17.537	13.3613	24.6923	11.3814
Acbd5	510.904	-0.232596	0.851102	0.0940864	-2.47216	0.01343	0.0752178	597.587	496.441	574.739	540.193	435.136	486.146	484.145	472.845
Acbd6	355.353	0.0125042	1.0087	0.104001	0.120232	0.904299	0.957508	341.047	350.715	374.875	349.483	324.434	334.033	379.203	389.036
Accs	197.329	-0.147785	0.902635	0.137798	-1.07248	0.283506	0.533777	226.359	215.675	189.508	198.01	164.409	218.92	170.201	195.553
Accsl	1.86802	-0.137359	0.909182	1.38084	-0.0994743	0.920762	NA	1.00604	6.80057	0	0	1.09606	2.05559	0.881868	3.10401
Acd	262.393	-0.232585	0.851109	0.119331	-1.94907	0.0512871	0.187822	240.443	286.595	314.812	291.996	250.998	227.142	239.868	247.286
Ace	30.6999	-0.132172	0.912456	0.500104	-0.26429	0.791557	0.90139	16.0966	10.6866	73.5251	28.2871	25.2094	17.4725	30.8654	43.4562
Acer2	39.7861	0.197475	1.14669	0.268953	0.734237	0.462804	0.692132	31.1872	44.6894	33.1381	39.237	31.7857	45.2229	42.3297	50.6989
Acer3	80.9649	0.735041	1.66444	0.231165	3.17973	0.00147415	0.0156287	67.4046	47.604	51.7783	75.7365	99.7415	103.807	72.3132	129.334
Ache	8.31915	0.357944	1.2816	0.560635	0.638461	0.523174	NA	6.03624	9.71509	4.14226	9.12488	12.0567	7.19455	7.93681	10.3467
Acin1	5473.98	-0.130769	0.913345	0.0491494	-2.66063	0.00779935	0.0514117	5843.08	5549.26	5663.51	5831.71	5189.84	5307.52	5235.65	5171.28
Ackr1	35.1022	-0.215362	0.86133	0.367856	-0.585452	0.558244	0.760491	31.1872	26.2308	61.0983	32.8496	33.9779	24.667	51.1483	19.6587
Ackr2	6.66189	-1.22603	0.427491	0.730707	-1.67787	0.0933717	NA	7.04227	5.82906	14.4979	10.0374	0	8.22234	3.52747	4.13868
Ackr3	175.452	0.185605	1.13729	0.159836	1.16122	0.245552	0.490029	168.009	205.96	150.157	132.311	191.811	188.086	161.382	205.899
Ackr4	1.69871	-0.365699	0.776093	1.26752	-0.288515	0.772952	NA	1.00604	0	2.07113	4.56244	1.09606	2.05559	1.76374	1.03467
Acly	3143.57	-0.260321	0.834902	0.063954	-4.07044	4.69236e-05	0.00116494	3347.09	3548.92	3413.22	3398.11	2607.53	2953.88	2993.06	2886.73
Aco1	560.247	0.0806615	1.0575	0.0829527	0.97238	0.330862	0.579159	522.134	575.134	543.672	537.456	560.087	608.453	573.214	561.826
Aco2	1391.46	-0.167565	0.890344	0.0866464	-1.93389	0.0531266	0.192056	1335.01	1434.92	1707.65	1412.53	1262.66	1304.27	1385.41	1289.2
Acot1	115.741	0.123749	1.08956	0.175341	0.705762	0.480336	0.704947	110.664	84.5213	138.766	109.499	115.086	128.474	119.934	118.987
Acot11	10.5086	-0.153892	0.898822	0.554221	-0.277673	0.781264	0.896528	18.1087	6.80057	8.28452	10.9499	17.537	5.13896	7.93681	9.31204
Acot13	75.4278	-0.05282	0.96405	0.201351	-0.262328	0.793069	0.902015	81.4892	57.3191	90.0942	78.474	78.9163	68.8621	75.8406	72.427
Acot2	50.2424	0.685954	1.60876	0.263396	2.60427	0.00920706	0.0579045	27.1631	39.8319	32.1025	54.7493	55.8991	66.8065	70.5494	54.8376
Acot6	42.3661	0.545285	1.45931	0.309767	1.76031	0.0783557	0.246191	29.1751	17.4872	45.5649	45.6244	39.4582	58.5842	50.2665	52.7682
Acot7	377.927	0.055967	1.03956	0.111608	0.501461	0.616046	0.801103	350.102	334.199	438.044	360.433	363.892	411.117	370.385	395.244
Acot8	97.8049	0.00484161	1.00336	0.197826	0.0244741	0.980474	0.991473	73.4409	127.268	83.8808	105.849	98.6454	93.5291	106.706	93.1204
Acot9	59.1442	0.14002	1.10192	0.226151	0.619143	0.535822	0.745011	62.3744	60.2336	53.8494	48.3619	77.8203	52.4174	52.9121	65.1843
Acox1	579.709	-0.102825	0.931208	0.111887	-0.919005	0.358093	0.605089	525.152	597.478	704.184	575.78	526.109	497.452	615.544	595.97
Acox3	207.134	-0.232673	0.851056	0.150454	-1.54647	0.12199	0.322994	202.214	265.222	199.864	228.122	207.155	157.252	221.349	175.894
Acp1	310.091	-0.192269	0.875228	0.131836	-1.45839	0.144734	0.356512	326.963	349.743	259.927	385.983	290.456	262.087	314.827	290.742
Acp2	378.189	-0.0828987	0.944159	0.110672	-0.749048	0.453828	0.684825	425.555	374.031	411.119	346.746	358.412	384.394	400.368	324.887
Acp4	1.53159	-1.78015	0.291153	1.63605	-1.08808	0.27656	NA	2.01208	4.85755	0	2.73747	0	0	2.6456	0
Acp5	3.06057	0.850604	1.80326	1.12127	0.75861	0.448086	NA	0	4.85755	1.03557	2.73747	6.57636	5.13896	0	4.13868
Acp6	132.137	0.426584	1.34405	0.163716	2.60564	0.00917034	0.0577023	131.791	108.809	101.485	108.586	140.296	166.502	127.871	171.755
Acr	41.3803	0.567674	1.48213	0.355649	1.59616	0.110452	0.304512	29.1751	45.6609	38.3159	20.0747	72.34	63.7231	31.7472	30.0055
Acrbp	97.7872	-0.632163	0.645209	0.172678	-3.66093	0.000251299	0.00412717	135.815	121.439	101.485	116.799	73.436	77.0845	77.6044	78.635
Acsbg1	84.5875	-0.650003	0.637279	0.252738	-2.57184	0.0101159	0.0618455	96.5798	120.467	102.521	93.0738	63.5715	72.9733	34.3928	93.1204
Acsf2	202.003	0.237393	1.17886	0.167695	1.41563	0.156884	0.374589	189.135	220.533	133.588	198.01	247.71	173.697	231.931	221.42
Acsf3	126.305	-0.0622656	0.957759	0.156254	-0.398491	0.690268	0.846059	122.737	129.211	129.446	134.136	120.567	141.835	103.179	129.334
Acsl1	65.938	0.171394	1.12615	0.203627	0.841703	0.399954	0.641548	56.3382	64.1196	70.4184	57.4868	74.5321	61.6676	76.7225	66.2189
Acsl3	541.253	0.0870179	1.06217	0.128288	0.678301	0.497581	0.717978	568.412	548.903	406.977	573.955	612.698	534.452	470.036	614.594
Acsl4	164.094	0.0765489	1.05449	0.161499	0.473988	0.635508	0.812558	136.821	190.416	136.695	174.285	179.754	146.974	154.327	193.483
Acsl5	92.4125	-0.0842825	0.943254	0.216928	-0.388527	0.697626	0.850908	76.459	123.382	88.023	93.0738	64.6675	83.2512	111.115	99.3284
Acsl6	516.385	0.108847	1.07837	0.112059	0.971334	0.331382	0.579416	504.026	450.78	549.885	482.706	566.663	619.759	488.555	468.706
Acsm2	2.38071	-4.68347	0.0389165	3.39919	-1.37782	0.168259	NA	17.1027	1.94302	0	0	0	0	0	0
Acsm3	1.38453	-0.157524	0.896562	1.53641	-0.102527	0.918338	NA	0	0.971509	2.07113	2.73747	2.19212	0	0	3.10401
Acss1	493.074	0.0348182	1.02443	0.114284	0.304664	0.760622	0.886157	500.002	523.644	444.257	479.056	549.126	546.786	403.014	498.711
Acss2	140.428	-0.264411	0.832539	0.178277	-1.48315	0.138035	0.346104	174.045	146.698	179.153	114.061	111.798	113.057	142.863	141.75
Acss3	22.472	0.701385	1.62606	0.353499	1.98412	0.0472423	0.177918	17.1027	15.5441	18.6402	17.3373	29.5936	18.5003	36.1566	26.9014
Acta1	2.61356	-0.408659	0.753323	1.0842	-0.376921	0.706232	NA	5.0302	0.971509	4.14226	1.82498	4.38424	1.02779	3.52747	0
Acta2	28.7558	-0.297945	0.81341	0.385705	-0.772468	0.439837	0.673499	23.1389	47.604	27.9603	28.2871	35.0739	14.3891	37.0385	16.5547
Actb	25287.5	-0.126485	0.916061	0.0619404	-2.04204	0.0411471	0.162288	25006.1	26495	28385.9	25696.6	23695.7	23260	25816.7	23944.4
Actg1	5558.63	-0.111267	0.925775	0.0649665	-1.71268	0.0867715	0.261899	5206.25	5871.8	6024.92	5988.66	5344.39	5118.41	5482.57	5432.02
Actg2	3.00032	1.39402	2.62811	1.17243	1.189	0.234439	NA	0	0.971509	1.03557	4.56244	3.28818	0	7.93681	6.20802
Actg-ps1	3.6168	0.561389	1.47569	0.927508	0.605266	0.545002	NA	2.01208	0.971509	5.17783	3.64995	1.09606	5.13896	8.81868	2.06934
Actl10	1.70021	-0.869242	0.547434	1.28416	-0.676898	0.498471	NA	2.01208	1.94302	3.1067	1.82498	0	0	2.6456	2.06934
Actl6a	825.802	-0.361427	0.778394	0.094426	-3.82763	0.000129385	0.00252728	896.381	1007.46	793.243	1016.51	740.937	697.871	702.849	751.171
Actl6b	271.251	-0.535349	0.689992	0.186763	-2.86646	0.00415093	0.032666	314.89	241.906	467.04	260.972	227.981	224.059	246.923	186.241
Actl7b	3.25961	-0.364187	0.776907	1.0565	-0.344712	0.730311	NA	7.04227	3.88604	0	3.64995	7.67242	1.02779	1.76374	1.03467
Actn1	814.165	-0.0500314	0.965915	0.0850195	-0.58847	0.556217	0.75908	856.139	889.903	745.607	821.24	779.299	757.483	800.736	862.915
Actn2	11.618	-0.37579	0.770683	0.593569	-0.633103	0.526666	0.737499	16.0966	2.91453	20.7113	12.7748	16.4409	4.11117	10.5824	9.31204
Actn3	3.92303	-1.2991	0.406381	0.867348	-1.49778	0.13419	NA	2.01208	7.77207	5.17783	7.29991	2.19212	1.02779	1.76374	4.13868
Actn4	1406.38	0.0386994	1.02719	0.0757638	0.51079	0.609498	0.796673	1336.02	1434.92	1316.2	1463.63	1365.69	1449.19	1548.56	1336.79
Actr10	373.186	-0.373901	0.771693	0.116832	-3.20032	0.00137277	0.0148149	438.633	384.718	481.538	381.42	327.722	329.921	358.038	283.5
Actr1a	1238.51	-0.208594	0.86538	0.0878969	-2.37317	0.0176363	0.0911946	1204.23	1296.96	1528.49	1282.05	1236.36	1113.1	1149.07	1097.79
Actr1b	755.797	-0.103362	0.930861	0.0909463	-1.13652	0.255739	0.502125	716.3	873.387	726.967	813.94	780.395	686.566	732.832	715.992
Actr2	1286.58	-0.126748	0.915893	0.0798333	-1.58766	0.112363	0.307483	1366.2	1277.53	1348.31	1379.68	1377.75	1127.49	1249.61	1166.07
Actr3	1454.63	-0.272651	0.827797	0.0757899	-3.59746	0.000321339	0.00501093	1483.91	1634.08	1755.28	1494.66	1263.76	1335.1	1344.85	1325.41
Actr3b	134.144	-0.483407	0.715286	0.176902	-2.73262	0.00628331	0.044114	155.936	138.926	137.73	192.535	97.5494	112.029	98.7692	139.681
Actr5	192.379	0.379083	1.30052	0.147	2.5788	0.0099145	0.0608626	153.924	169.043	171.904	174.285	167.697	248.726	213.412	240.044
Actr6	136.62	0.154678	1.11317	0.15473	0.999666	0.317472	0.56685	120.725	139.897	111.841	144.173	146.872	162.391	136.69	130.369
Actr8	486.866	0.0782153	1.05571	0.0989243	0.790658	0.429143	0.66485	504.026	475.068	492.929	424.307	473.498	503.618	553.813	467.671
Acvr1	369.01	-0.111363	0.925713	0.112553	-0.989434	0.322451	0.571202	374.247	401.233	421.475	337.621	324.434	342.255	402.132	348.684
Acvr1b	590.942	-0.355266	0.781726	0.0925517	-3.83857	0.000123755	0.00246935	738.433	653.826	662.762	599.505	508.572	529.313	546.758	488.365
Acvr1c	33.5437	-1.62187	0.324914	0.397009	-4.08523	4.40334e-05	0.00110622	61.3684	23.3162	67.3117	51.0993	13.1527	10.2779	27.3379	14.4854
Acvr2a	516.31	0.179003	1.1321	0.108764	1.64579	0.0998075	0.287157	481.893	469.239	537.458	448.944	520.629	651.621	510.602	510.093
Acvr2b	983.17	-0.10383	0.930559	0.0900304	-1.15328	0.248796	0.493988	1088.53	1098.78	864.697	1021.07	987.55	972.292	907.442	924.996
Acvrl1	105.008	0.432273	1.34936	0.20112	2.14933	0.0316081	0.13658	69.4167	99.094	106.663	83.0364	118.374	109.974	155.209	98.2937
Acy1	105.07	-0.123162	0.918173	0.177951	-0.692113	0.488866	0.711449	96.5798	109.781	103.557	127.748	122.759	87.3624	99.6511	93.1204
Acy3	3.24504	-0.858531	0.551514	0.905673	-0.947948	0.343156	NA	5.0302	4.85755	3.1067	3.64995	3.28818	4.11117	0.881868	1.03467
Acyp1	40.2852	-0.219372	0.858939	0.298912	-0.733902	0.463008	0.692136	35.2114	50.5185	47.636	40.1495	31.7857	22.6114	40.5659	53.8029
Acyp2	11.9207	0.413176	1.33161	0.467655	0.883505	0.376963	0.622033	11.0664	6.80057	10.3557	12.7748	10.9606	14.3891	17.6374	11.3814
Ada	31.7077	-0.313842	0.804497	0.302571	-1.03725	0.299619	0.549884	41.2476	30.1168	26.9247	41.9745	27.4015	29.806	22.0467	34.1441
Adal	209.879	-0.394811	0.760589	0.133649	-2.95408	0.00313599	0.0264914	224.347	238.02	266.14	226.297	161.121	163.419	207.239	192.449
Adam10	1105.49	0.105199	1.07564	0.065295	1.61113	0.107152	0.299442	1050.3	1046.32	1066.63	1096.81	1188.13	1124.41	1133.2	1138.14
Adam11	131.818	0.216321	1.16177	0.199031	1.08687	0.277094	0.527005	86.5194	127.268	163.619	110.411	168.793	146.974	134.044	116.918
Adam12	157.998	0.276987	1.21166	0.215746	1.28386	0.199191	0.431866	114.688	154.47	170.868	132.311	160.025	175.753	245.159	110.71
Adam15	178.818	0.274097	1.20924	0.137112	1.99908	0.0455992	0.173867	175.051	135.04	156.37	180.673	201.675	201.447	187.838	192.449
Adam17	420.469	0.22148	1.16593	0.0942295	2.35043	0.0187518	0.095233	373.241	370.145	386.266	423.395	425.271	465.59	465.626	454.22
Adam19	434.831	-0.0543975	0.962997	0.120912	-0.449894	0.652787	0.823116	437.627	434.265	516.747	385.07	402.254	373.089	492.964	436.631
Adam1a	72.5756	-0.636229	0.643393	0.210005	-3.02959	0.00244882	0.0223376	92.5556	68.9772	97.3431	94.8988	54.803	56.5286	67.9038	47.5949
Adam21	9.91166	-0.113995	0.924026	0.545985	-0.208788	0.834614	0.924661	8.04831	9.71509	13.4623	10.0374	3.28818	14.3891	7.93681	12.416
Adam22	629.719	-0.294379	0.815423	0.125656	-2.34274	0.0191426	0.0962384	733.403	629.538	847.092	566.655	522.821	562.203	641.118	534.925
Adam23	382.789	0.0408172	1.0287	0.138828	0.294012	0.768748	0.889233	468.814	369.174	338.63	332.146	428.56	397.756	311.299	415.938
Adam30	6.40107	5.40157	42.2702	1.16414	4.63996	3.48482e-06	NA	0	0	0	0.912488	14.2488	14.3891	12.3462	9.31204
Adam32	5.19793	0.528856	1.44278	0.914582	0.578249	0.563096	NA	10.0604	3.88604	3.1067	0	3.28818	4.11117	2.6456	14.4854
Adam33	4.06705	-0.482409	0.715782	1.169	-0.412668	0.67985	NA	0	11.6581	7.24896	0	8.76848	1.02779	1.76374	2.06934
Adam4	71.7849	-0.113998	0.924024	0.211999	-0.53773	0.590764	0.782901	79.4771	68.9772	93.2009	57.4868	64.6675	67.8343	78.4862	64.1496
Adam8	111.767	-0.146521	0.903426	0.197811	-0.740714	0.458867	0.688729	135.815	117.553	91.1297	125.923	90.973	97.6403	141.981	93.1204
Adam9	362.084	-0.128739	0.91463	0.100445	-1.28169	0.199952	0.43296	379.277	358.487	405.942	369.558	370.468	338.144	357.157	317.644
Adamts1	264.066	0.190395	1.14108	0.167446	1.13705	0.255516	0.501832	212.274	206.931	304.456	263.709	240.037	225.087	328.937	331.095
Adamts10	697.607	0.106151	1.07635	0.105452	1.00663	0.314114	0.5633	621.732	711.145	584.059	769.228	720.112	778.039	646.409	750.136
Adamts12	267.137	0.639089	1.55735	0.165952	3.85104	0.000117615	0.00237274	179.075	224.419	209.184	223.56	314.569	238.448	431.233	316.609
Adamts13	1.32358	-3.84233	0.0697178	1.62901	-2.35869	0.0183393	NA	2.01208	1.94302	2.07113	4.56244	0	0	0	0
Adamts14	16.1752	0.553579	1.46772	0.433816	1.27607	0.201931	0.435231	5.0302	18.4587	12.4268	16.4248	18.633	20.5559	20.283	17.5894
Adamts15	87.9917	0.4442	1.36056	0.226755	1.95894	0.0501196	0.18467	51.308	104.923	80.7741	61.1367	119.471	90.4458	99.6511	96.2244
Adamts16	13.8196	-0.103139	0.931005	0.516525	-0.199678	0.841733	0.927995	9.05435	18.4587	18.6402	10.9499	23.0173	16.4447	8.81868	5.17335
Adamts17	158.704	-1.1548	0.449129	0.208698	-5.53335	3.14178e-08	2.68837e-06	188.129	184.587	321.025	183.41	82.2045	91.4736	122.58	96.2244
Adamts18	340.297	-1.0793	0.473257	0.197574	-5.46277	4.68769e-08	3.76288e-06	398.392	350.715	686.58	413.357	190.714	223.031	279.552	180.033
Adamts19	200.524	-0.487247	0.713385	0.184493	-2.641	0.00826605	0.0535103	202.214	232.191	187.437	314.808	144.68	164.447	212.53	145.889
Adamts2	44.0766	0.106464	1.07659	0.320424	0.332259	0.739693	0.874423	46.2778	41.7749	49.7071	31.9371	74.5321	24.667	42.3297	41.3868
Adamts20	260.752	-0.13329	0.91175	0.154386	-0.863355	0.387942	0.631291	247.486	330.313	199.864	312.984	247.71	265.171	254.86	227.628
Adamts3	451.249	-0.769204	0.586741	0.28151	-2.73242	0.00628703	0.0441217	483.905	416.778	904.048	470.844	298.128	356.644	388.904	290.742
Adamts4	92.3346	-0.285267	0.82059	0.190979	-1.49371	0.135252	0.34267	92.5556	97.1509	93.2009	123.186	67.9557	85.3068	99.6511	79.6696
Adamts5	65.4564	0.242106	1.18272	0.276876	0.874419	0.38189	0.626218	50.302	50.5185	66.2762	72.9991	81.1085	37.0005	96.1236	69.3229
Adamts6	343.08	-0.028042	0.98075	0.127342	-0.220209	0.825708	0.91949	420.524	338.085	299.278	328.496	334.298	304.227	384.494	335.233
Adamts7	475.905	0.369738	1.29212	0.109877	3.36502	0.000765378	0.00960683	419.518	386.661	376.946	477.231	475.69	573.508	514.129	583.554
Adamts8	18.7523	1.04382	2.06168	0.475357	2.19587	0.0281012	0.125626	8.04831	7.77207	20.7113	12.7748	18.633	21.5836	44.9753	15.5201
Adamts9	387.053	-0.402371	0.756614	0.128248	-3.13745	0.00170427	0.0174115	480.887	387.632	424.582	470.844	314.569	281.615	408.305	327.991
Adamtsl1	68.5241	-0.00240147	0.998337	0.196393	-0.0122279	0.990244	0.9955	67.4046	67.0341	74.5607	65.6992	69.0518	63.7231	77.6044	63.1149
Adamtsl2	71.8399	0.249047	1.18842	0.232002	1.07347	0.28306	0.533311	50.302	84.5213	49.7071	77.5615	86.5888	65.7787	72.3132	87.947
Adamtsl3	55.5311	-1.25973	0.417621	0.245192	-5.13775	2.78051e-07	1.7232e-05	64.3865	93.2649	75.5963	80.299	35.0739	34.945	37.9203	22.7628
Adamtsl4	6.37819	-0.202285	0.869173	0.64317	-0.314513	0.753131	NA	8.04831	9.71509	4.14226	5.47493	6.57636	4.11117	8.81868	4.13868
Adamtsl5	2.04425	2.19854	4.59016	1.41706	1.55148	0.120786	NA	1.00604	0.971509	0	0.912488	1.09606	7.19455	0	5.17335
Adap1	23.4322	-0.235151	0.849596	0.364833	-0.644544	0.519223	0.733166	26.157	23.3162	33.1381	19.1623	19.7291	13.3613	30.8654	21.7281
Adap2	22.3968	-0.100161	0.932929	0.401608	-0.2494	0.803052	0.907034	18.1087	21.3732	37.2803	16.4248	15.3448	17.4725	33.511	19.6587
Adar	923.435	-0.0389565	0.973359	0.0828944	-0.469953	0.638389	0.814132	880.284	920.019	1047.99	896.064	915.21	953.792	921.552	852.569
Adarb1	273.89	0.183336	1.13551	0.136262	1.34547	0.178475	0.404321	264.588	214.704	288.923	257.322	349.643	261.059	261.033	293.846
Adarb2	54.8897	0.0398112	1.02798	0.352904	0.11281	0.910181	0.960012	58.3503	61.2051	60.0628	36.4995	107.414	41.1117	29.9835	44.4908
Adat1	252.041	-0.0651099	0.955872	0.129289	-0.503598	0.614544	0.799951	269.619	279.795	252.678	228.122	254.286	267.226	202.83	261.772
Adat2	63.3717	-0.0787529	0.946876	0.230825	-0.34118	0.732968	0.871606	82.4952	53.433	61.0983	62.9617	73.436	67.8343	46.739	58.9762
Adck1	122.777	-0.0135064	0.990682	0.177537	-0.0760767	0.939358	0.973069	126.761	108.809	140.837	117.711	87.6848	131.557	132.28	136.577
Adck2	112.258	-0.0190905	0.986855	0.165154	-0.115592	0.907976	0.959034	101.61	109.781	132.552	108.586	104.126	100.724	121.698	118.987
Adck5	117.982	-0.0696722	0.952854	0.181729	-0.383385	0.701434	0.852626	111.67	111.724	142.908	117.711	87.6848	138.752	127.871	105.536
Adcy1	369.706	-0.538765	0.68836	0.203709	-2.64478	0.00817439	0.053193	403.422	361.401	688.651	299.296	267.439	276.476	347.456	313.505
Adcy10	5.2183	1.01192	2.01659	0.740754	1.36606	0.171919	NA	4.02416	0.971509	6.21339	2.73747	4.38424	6.16676	7.93681	9.31204
Adcy2	54.2706	0.281821	1.21573	0.298873	0.942944	0.345709	0.594231	64.3865	65.0911	38.3159	28.2871	46.0345	81.1956	52.9121	57.9416
Adcy3	230.378	-0.0913912	0.938617	0.126727	-0.721166	0.470807	0.698504	262.576	235.105	222.646	230.86	225.788	188.086	245.159	232.801
Adcy4	52.2169	0.731601	1.66048	0.244798	2.98858	0.00280273	0.0244542	43.2597	41.7749	37.2803	34.6746	81.1085	47.2785	66.1401	66.2189
Adcy5	422.379	0.115164	1.0831	0.154744	0.744224	0.456741	0.687129	405.434	357.515	558.17	302.034	432.944	424.478	457.689	440.77
Adcy6	685.301	-0.0404006	0.972385	0.0968712	-0.417055	0.676638	0.838313	701.209	763.606	660.691	654.254	598.449	685.538	656.11	762.552
Adcy7	34.4088	0.262253	1.19935	0.304909	0.860104	0.389732	0.632586	29.1751	40.8034	18.6402	36.4995	35.0739	38.0283	44.9753	32.0748
Adcy8	22.4157	-0.65181	0.636481	0.408382	-1.59608	0.110472	0.304512	29.1751	19.4302	39.3515	21.8997	7.67242	26.7226	18.5192	16.5547
Adcy9	126.648	-0.0473348	0.967722	0.184595	-0.256425	0.797623	0.904631	128.773	133.097	157.406	95.8113	117.278	120.252	108.47	152.097
Adcyap1	26.7543	-0.913105	0.531041	0.37288	-2.44879	0.0143338	0.0789364	48.2899	31.0883	18.6402	41.9745	17.537	16.4447	25.5742	14.4854
Adcyap1r1	482.841	-0.49005	0.712	0.1447	-3.38666	0.000707499	0.00901892	497.989	483.812	773.567	501.869	385.813	391.589	433.879	394.21
Add1	2411.16	-0.108788	0.927367	0.0752148	-1.44636	0.148075	0.361702	2316.91	2548.27	2754.6	2388.89	2436.54	2328.98	2366.05	2149.01
Add2	2076.41	-0.192758	0.874931	0.0990912	-1.94526	0.0517432	0.188795	2044.27	2114	2734.93	1967.32	1949.89	1989.81	1920.71	1890.34
Add3	737.728	0.10258	1.07369	0.116263	0.882307	0.377611	0.622262	741.451	765.549	593.379	746.415	711.343	663.954	910.97	768.76
Adgb	4.34239	1.35719	2.56185	0.832161	1.63092	0.102908	NA	4.02416	1.94302	1.03557	2.73747	6.57636	2.05559	7.05494	9.31204
Adgra1	17.4788	0.284754	1.2182	0.418971	0.679651	0.496725	0.717317	13.0785	22.3447	15.5335	11.8623	27.4015	20.5559	11.4643	17.5894
Adgra2	204.591	0.461386	1.37686	0.179961	2.56381	0.010353	0.0628448	146.882	210.818	152.228	178.848	266.343	179.864	298.953	202.795
Adgra3	1776.47	0.437035	1.35382	0.0727707	6.00564	1.90573e-09	2.47115e-07	1456.74	1602.02	1408.37	1568.57	2132.93	2029.89	1894.25	2119.01
Adgrb1	935.722	-0.128588	0.914726	0.0852277	-1.50876	0.131361	0.337171	910.466	1017.17	1071.81	911.576	823.141	889.041	936.544	926.03
Adgrb2	1057.89	0.487999	1.4025	0.0783736	6.22657	4.76759e-10	6.869e-08	826.964	855.9	948.578	890.589	1262.66	1320.71	1154.37	1203.32
Adgrb3	873.63	-0.390751	0.762733	0.104148	-3.75187	0.000175522	0.00315098	1034.21	886.017	1173.3	872.339	748.609	803.734	761.052	709.784
Adgre1	21.1618	1.05474	2.07735	0.385745	2.7343	0.00625132	0.0439464	8.04831	17.4872	18.6402	10.9499	20.8251	31.8616	27.3379	34.1441
Adgre5	112.682	0.337761	1.26379	0.204266	1.65353	0.0982228	0.283906	106.64	70.9202	102.521	118.623	111.798	104.835	164.027	122.091
Adgrf2	2.43436	-0.0717129	0.951508	1.20418	-0.0595532	0.952511	NA	2.01208	3.88604	3.1067	0.912488	4.38424	0	0	5.17335
Adgrf4	3.08449	0.38802	1.3086	1.14277	0.339543	0.734201	NA	3.01812	1.94302	3.1067	2.73747	3.28818	0	10.5824	0
Adgrf5	349.185	0.167219	1.12289	0.129219	1.29408	0.195639	0.42658	308.854	332.256	363.483	312.071	389.101	285.726	423.297	378.69
Adgrg1	1762.24	-0.355857	0.781405	0.0616664	-5.77069	7.89488e-09	8.21506e-07	1983.91	1896.39	2070.09	1963.67	1592.58	1493.38	1545.91	1552.01
Adgrg2	7.64758	-0.395772	0.760082	0.684638	-0.578075	0.563213	NA	7.04227	7.77207	7.24896	12.7748	9.86454	1.02779	12.3462	3.10401
Adgrg3	17.8558	-0.25339	0.838923	0.391317	-0.64753	0.517289	0.732202	22.1329	18.4587	11.3912	25.5497	16.4409	16.4447	15.8736	16.5547
Adgrg6	26.2852	1.74695	3.35648	0.382871	4.56276	5.04848e-06	0.000187038	10.0604	15.5441	14.4979	8.2124	59.1872	25.6948	38.8022	38.2828
Adgrl1	3220.65	-0.243298	0.844812	0.0921056	-2.64152	0.00825361	0.0534503	3400.41	3254.56	4193	3119.8	2836.6	2844.93	3033.63	3082.28
Adgrl2	2350.81	-0.0507232	0.965452	0.0798994	-0.634838	0.525534	0.737037	2223.35	2393.8	2694.54	2257.5	2261.17	2508.84	2271.69	2195.57
Adgrl3	915.247	0.153643	1.11237	0.0845809	1.81652	0.0692914	0.227867	881.29	967.623	823.274	793.865	988.646	1008.26	939.189	919.822
Adgrl4	59.3553	0.138242	1.10056	0.254382	0.543442	0.586825	0.780135	41.2476	51.49	81.8096	52.0118	58.0912	51.3896	76.7225	62.0802
Adgrv1	2848.44	0.0596487	1.04221	0.0720733	0.827611	0.407891	0.647257	2953.73	2941.73	2504	2759.36	2839.89	2946.68	3060.96	2781.2
Adh5	667.077	-0.326022	0.797733	0.101713	-3.20532	0.00134913	0.0146252	703.221	846.185	676.224	743.678	588.584	563.23	670.22	545.271
Adh6b	1.63715	3.34431	10.1564	1.62812	2.0541	0.039966	NA	1.00604	0	0	0	5.4803	3.08338	3.52747	0
Adhfe1	72.1005	3.2363	9.42375	0.323488	10.0044	1.4578e-23	2.70219e-20	11.0664	9.71509	9.32009	24.6372	157.833	163.419	89.0687	111.744
Adi1	119.27	-0.165937	0.891349	0.208171	-0.797121	0.425381	0.661335	100.604	102.98	153.264	147.823	104.126	82.2234	123.462	139.681
Adig	2.86954	0.464081	1.37944	1.04716	0.44318	0.657636	NA	2.01208	3.88604	0	3.64995	7.67242	2.05559	2.6456	1.03467
Adipor1	623.759	0.0626108	1.04435	0.0948287	0.660252	0.509092	0.727207	598.593	658.683	521.925	660.642	647.772	617.703	628.772	655.981
Adipor2	690.359	-0.143076	0.905586	0.0832052	-1.71956	0.0855133	0.259636	698.191	761.663	719.718	719.953	619.274	667.037	715.195	621.837
Adk	286.572	0.0411722	1.02895	0.133956	0.307356	0.758573	0.885265	303.824	305.054	227.824	293.821	264.15	268.254	343.047	286.604
Adm	15.6378	0.546577	1.46062	0.476096	1.14804	0.250952	0.496573	19.1147	16.5157	6.21339	9.12488	8.76848	20.5559	22.0467	22.7628
Adnp	216.119	-0.0922949	0.938029	0.132417	-0.697003	0.485801	0.709632	188.129	261.336	223.682	218.997	218.116	196.308	219.585	202.795
Adnp2	641.25	0.269236	1.20517	0.0968769	2.77916	0.00544999	0.0399089	633.805	534.33	557.134	600.417	714.631	644.426	657.873	787.384
Ado	363.711	0.343128	1.2685	0.107766	3.18401	0.00145248	0.0154476	298.794	325.456	301.349	356.783	361.7	438.867	411.832	414.903
Adora1	43.8649	-0.909201	0.53248	0.462121	-1.96745	0.0491311	0.18232	39.2355	21.3732	136.695	31.9371	30.6897	23.6392	35.2747	32.0748
Adora2a	46.9133	0.664476	1.58499	0.282418	2.35281	0.0186323	0.0948038	32.1933	51.49	36.2448	25.5497	43.8424	71.9455	64.3764	49.6642
Adora2b	7.03606	0.393264	1.31336	0.64602	0.608749	0.542691	NA	5.0302	8.74358	4.14226	6.38742	13.1527	4.11117	10.5824	4.13868
Adpgk	408.424	0.140608	1.10237	0.0919999	1.52835	0.126425	0.329627	399.398	413.863	375.91	364.995	428.56	430.645	421.533	432.492
Adprh	635.317	0.216639	1.16202	0.0966395	2.24172	0.0249794	0.115522	558.352	623.709	538.494	629.617	687.23	604.342	689.621	751.171
Adprhl1	1.54553	1.05242	2.07401	1.87189	0.562222	0.573965	NA	4.02416	0	0	0	6.57636	0	1.76374	0
Adprhl2	223.381	0.216983	1.1623	0.132366	1.63926	0.101158	0.28947	197.184	205.96	183.295	239.072	276.207	231.253	233.695	220.385
Adprm	86.0872	0.0334804	1.02348	0.205373	0.163022	0.870501	0.942879	85.5133	90.3504	85.9519	78.474	72.34	120.252	74.0769	81.739
Adra1a	24.5971	-0.222517	0.857069	0.334471	-0.665279	0.505872	0.724543	32.1933	18.4587	26.9247	28.2871	20.8251	24.667	18.5192	26.9014
Adra1b	1.89119	-1.00646	0.497766	1.30024	-0.774054	0.438899	NA	1.00604	0.971509	7.24896	0.912488	2.19212	0	1.76374	1.03467
Adra2a	115.593	0.584206	1.49921	0.200294	2.91673	0.00353717	0.0290575	102.616	98.1224	69.3829	99.4612	167.697	97.6403	136.69	153.131
Adra2b	3.30921	0.540557	1.45453	1.09787	0.492369	0.622458	NA	0	2.91453	4.14226	3.64995	9.86454	0	1.76374	4.13868
Adra2c	13.4891	0.449195	1.36528	0.507732	0.884709	0.376314	0.621426	11.0664	7.77207	20.7113	6.38742	7.67242	18.5003	20.283	15.5201
Adrb1	17.9871	-0.315708	0.803457	0.542773	-0.581657	0.560798	0.762499	16.0966	6.80057	42.4582	14.5998	14.2488	25.6948	16.7555	7.2427
Adrb2	6.33406	0.337715	1.26375	0.678582	0.497677	0.618712	NA	4.02416	6.80057	6.21339	5.47493	5.4803	2.05559	12.3462	8.27737
Adrm1	561.272	-0.210605	0.864175	0.0852753	-2.46971	0.0135224	0.0756045	575.454	602.336	588.201	642.392	541.454	515.952	537.058	487.33
Adsl	538.948	-0.120682	0.919753	0.116681	-1.03429	0.301	0.551398	595.575	519.757	467.04	662.467	569.951	509.785	507.956	479.053
Adss	689.288	-0.110125	0.926508	0.0844027	-1.30475	0.191976	0.421593	674.046	795.666	711.433	681.629	663.116	645.454	686.975	655.981
Adssl1	14.0855	1.45809	2.74744	0.553253	2.63548	0.00840185	0.0542228	4.02416	3.88604	9.32009	12.7748	17.537	8.22234	23.8104	33.1095
Aebp1	243.826	0.716716	1.64344	0.187196	3.82869	0.000128826	0.00251927	181.087	224.419	199.864	133.223	346.355	222.003	375.676	267.98
Aebp2	879.232	0.0841576	1.06007	0.0834483	1.0085	0.313214	0.562824	880.284	885.045	803.599	844.964	846.158	910.624	855.412	1007.77
Aen	623.399	1.02802	2.03922	0.114614	8.96942	2.98073e-19	2.39268e-16	400.404	398.319	371.768	469.019	851.639	974.347	706.376	815.321
Aes	1646.72	-0.200509	0.870243	0.0807659	-2.4826	0.0130428	0.0736802	1669.02	1795.35	1826.74	1754.72	1331.71	1555.05	1674.67	1566.49
AF357341	2.93536	-1.01077	0.496282	0.984217	-1.02698	0.304431	NA	4.02416	1.94302	6.21339	3.64995	0	2.05559	3.52747	2.06934
AF357399	26.0174	0.669639	1.59068	0.368812	1.81566	0.0694219	0.228207	21.1268	17.4872	32.1025	10.0374	25.2094	29.806	36.1566	36.2135
Afap1	1305.76	-0.299302	0.812646	0.0990304	-3.02232	0.00250842	0.0227214	1361.17	1356.23	1761.5	1284.78	1196.9	1136.74	1170.24	1178.49
Afap1l1	107.254	0.049658	1.03502	0.191185	0.259738	0.795066	0.903189	94.5677	112.695	101.485	113.149	103.03	77.0845	128.753	127.265
Afap1l2	64.5933	0.177792	1.13115	0.242642	0.732734	0.46372	0.692274	50.302	56.3475	69.3829	66.6117	84.3966	50.3618	85.5412	53.8029
Afdn	4222.21	-0.100867	0.932472	0.0497398	-2.0279	0.0425704	0.16646	4366.21	4364.02	4468.46	4281.4	4080.63	4090.62	4143.9	3982.45
Aff1	318.438	0.288507	1.22138	0.114308	2.52394	0.0116047	0.068303	267.606	325.456	294.1	260.059	320.05	384.394	349.22	346.615
Aff2	740.063	-0.247987	0.84207	0.0937672	-2.64471	0.00817601	0.053193	807.85	795.666	885.408	726.341	603.929	673.204	685.211	742.894
Aff3	1901.65	-0.576171	0.670742	0.118343	-4.86866	1.12357e-06	5.57061e-05	2172.04	2016.85	2939.97	1978.27	1450.09	1584.86	1658.79	1412.33
Aff4	3687.03	-0.147889	0.90257	0.0606199	-2.43961	0.0147032	0.0802463	3775.67	3804.43	4088.41	3837.01	3294.76	3539.72	3681.8	3474.42
Afg1l	65.1597	0.386199	1.30695	0.224638	1.7192	0.0855773	0.259783	63.3805	61.2051	51.7783	50.1869	56.9951	66.8065	94.3599	76.5656
Afg3l1	515.618	-0.196824	0.872469	0.10606	-1.85578	0.0634843	0.215801	543.261	619.823	523.996	514.643	550.222	454.284	430.352	488.365
Afg3l2	607.682	0.0217473	1.01519	0.102809	0.211531	0.832473	0.923195	535.213	550.846	694.864	631.442	628.042	566.314	604.961	649.773
Afmid	26.6531	0.029555	1.0207	0.35238	0.0838726	0.933158	0.970044	32.1933	30.1168	20.7113	22.8122	14.2488	33.9172	34.3928	24.8321
Aftph	546.506	0.156836	1.11484	0.0900725	1.74122	0.0816446	0.252993	537.225	473.125	567.49	490.006	567.759	589.953	560.868	585.624
Aga	27.7274	0.488136	1.40263	0.372235	1.31136	0.189735	0.419017	17.1027	19.4302	28.9958	26.4622	41.6503	41.1117	14.9918	32.0748
Agap1	2237.19	-0.172332	0.887407	0.06946	-2.48102	0.0131005	0.0739322	2388.34	2221.84	2614.8	2258.41	2150.47	2057.64	2101.49	2104.52
Agap2	512.247	-0.226573	0.854663	0.267483	-0.847056	0.396964	0.638818	519.116	455.638	838.808	396.02	521.725	451.201	377.439	538.029
Agap3	1337.31	-0.00984903	0.993196	0.0667735	-0.147499	0.882738	0.949181	1294.77	1320.28	1444.61	1308.51	1306.5	1356.69	1327.21	1339.9
Agbl1	13.38	-1.66531	0.315276	0.652976	-2.55034	0.0107617	0.0647063	20.1208	21.3732	24.8536	15.5123	5.4803	1.02779	17.6374	1.03467
Agbl2	15.5997	0.258956	1.19661	0.451149	0.573992	0.565973	0.765515	19.1147	8.74358	15.5335	13.6873	7.67242	19.5281	22.9286	17.5894
Agbl3	59.2315	-0.00493105	0.996588	0.24572	-0.0200678	0.983989	0.993225	59.3563	62.1766	78.7029	37.412	62.4754	53.4452	58.2033	62.0802
Agbl4	41.2092	-0.405487	0.754981	0.298799	-1.35706	0.174763	0.399049	61.3684	34.0028	60.0628	32.8496	33.9779	38.0283	41.4478	27.9361
Agbl5	630.445	-0.0795268	0.946368	0.0809213	-0.982767	0.325722	0.574221	652.919	604.279	657.584	676.154	602.833	605.37	598.788	645.635
Ager	37.9788	-0.531707	0.691736	0.364869	-1.45725	0.145047	0.357151	54.3261	68.0057	23.818	33.7621	26.3054	19.5281	44.9753	33.1095
Agfg1	999.095	-0.0951421	0.93618	0.0829466	-1.14703	0.25137	0.497107	997.991	1000.65	1071.81	1057.57	877.944	1077.13	921.552	988.111
Agfg2	183.437	-0.254013	0.83856	0.166641	-1.52431	0.127431	0.331087	161.972	180.701	227.824	227.21	162.217	210.698	143.744	153.131
Aggf1	721.218	0.0455801	1.0321	0.0916191	0.497496	0.61884	0.802198	742.457	703.373	677.26	716.303	761.762	623.87	764.579	780.142
Agk	228.746	0.0115174	1.00802	0.121245	0.0949926	0.924321	0.96694	204.226	228.305	257.856	220.822	231.269	233.309	215.176	239.009
Agl	461.34	-0.353551	0.782655	0.0874102	-4.04473	5.23828e-05	0.00126688	507.044	518.786	537.458	507.344	413.215	379.256	412.714	414.903
Agmo	2.3291	-1.47963	0.358581	1.19263	-1.24065	0.214736	NA	5.0302	6.80057	1.03557	0.912488	0	2.05559	1.76374	1.03467
Ago1	3589.19	-0.258473	0.835972	0.0619487	-4.17237	3.01451e-05	0.00081175	3827.98	4056.05	3640.01	4115.32	3226.8	3230.35	3396.07	3220.93
Ago2	2505.45	0.274812	1.20984	0.08352	3.29038	0.00100053	0.0116706	2358.16	2492.89	1988.29	2230.12	2587.8	2961.07	2600.63	2824.65
Ago3	698.118	-0.0560445	0.961898	0.0862075	-0.650111	0.51562	0.731407	770.626	655.769	732.145	688.929	694.902	707.121	706.376	629.08
Ago4	277.653	0.141917	1.10337	0.145473	0.975554	0.329286	0.577904	271.631	212.761	328.274	243.634	281.687	340.199	263.679	279.361
Agpat1	525.348	0.0348339	1.02444	0.103636	0.336116	0.736783	0.873566	531.189	502.27	548.85	493.656	608.313	536.508	530.884	451.116
Agpat2	16.2612	1.48479	2.79876	0.449507	3.30314	0.000956071	0.0113417	5.0302	10.6866	11.3912	7.29991	15.3448	28.7782	30.8654	20.6934
Agpat3	759.729	-0.0372686	0.974498	0.0778169	-0.478927	0.63199	0.810374	770.626	760.692	824.31	723.603	713.535	763.65	755.761	765.656
Agpat4	240.375	0.148971	1.10878	0.110627	1.34661	0.178106	0.404028	238.431	225.39	224.718	223.56	245.517	244.615	254.86	265.91
Agpat5	323.451	-0.0343533	0.976469	0.114156	-0.300932	0.763466	0.886759	330.987	356.544	319.99	302.946	302.513	309.366	370.385	294.881
Agps	778.999	0.0641139	1.04544	0.104625	0.612796	0.540011	0.748487	772.638	845.213	632.73	794.777	903.154	760.567	753.115	769.795
Agrn	4760.33	0.167968	1.12348	0.0559463	3.00232	0.00267934	0.0237442	4278.68	4617.58	4545.1	4492.18	5079.14	5265.38	4956.1	4848.47
Agrp	2.2145	-0.956744	0.515218	1.17097	-0.81705	0.4139	NA	2.01208	0.971509	4.14226	4.56244	0	4.11117	0.881868	1.03467
Agtpbp1	767.252	-0.15322	0.899241	0.105484	-1.45254	0.14635	0.359058	716.3	860.757	929.937	725.428	779.299	724.594	753.997	647.704
Agtr1a	5.75584	0.0426	1.02997	0.678307	0.0628035	0.949923	NA	8.04831	6.80057	4.14226	3.64995	9.86454	4.11117	5.29121	4.13868
Agtr2	4.576	0.20589	1.1534	0.850933	0.241959	0.808812	NA	2.01208	0.971509	10.3557	3.64995	5.4803	6.16676	1.76374	6.20802
Agtrap	117.85	0.396988	1.31676	0.169218	2.34601	0.0189755	0.0957558	110.664	90.3504	92.1653	114.061	131.527	120.252	159.618	124.16
Ahctf1	1776.52	0.124182	1.08989	0.0678678	1.82976	0.0672853	0.224289	1729.38	1716.66	1576.13	1776.61	1835.9	1924.03	1749.63	1903.79
Ahcy	266.81	0.00361036	1.00251	0.137456	0.0262655	0.979046	0.990455	256.54	271.051	222.646	314.808	248.806	257.976	246.041	316.609
Ahcyl1	1696.73	-0.249764	0.841034	0.0690953	-3.61478	0.000300607	0.00477149	1779.68	1846.84	1817.42	1929.91	1556.41	1453.3	1675.55	1514.76
Ahcyl2	408.883	-0.00405684	0.997192	0.106639	-0.0380426	0.969654	0.986553	405.434	410.948	380.052	441.644	429.656	385.422	456.808	361.1
Ahdc1	996.009	-0.0884386	0.94054	0.115249	-0.767367	0.442864	0.676068	925.556	1007.46	1274.78	899.714	968.917	967.153	1068.82	855.673
Ahi1	818.16	-0.0853319	0.942568	0.103347	-0.82568	0.408986	0.648323	858.151	818.011	992.071	702.616	765.05	769.817	826.31	813.251
Ahnak	1356.48	0.531959	1.44589	0.108764	4.89095	1.0035e-06	5.14165e-05	1129.78	1226.04	983.787	1097.72	1646.28	1318.66	1887.2	1562.35
Ahnak2	11.1941	0.156313	1.11444	0.653583	0.239163	0.810979	0.91065	9.05435	5.82906	16.569	10.9499	1.09606	24.667	7.93681	13.4507
Ahr	34.001	0.151922	1.11105	0.347662	0.436982	0.662125	0.828621	21.1268	36.9174	35.2092	35.587	26.3054	22.6114	35.2747	58.9762
Ahrr	28.3476	-0.748896	0.595059	0.338754	-2.21074	0.0270541	0.122397	31.1872	35.9458	24.8536	50.1869	14.2488	24.667	22.9286	22.7628
Ahsa1	538.91	0.068105	1.04834	0.0893262	0.76243	0.445803	0.678669	531.189	575.134	483.609	514.643	530.493	547.814	545.876	582.52
Ahsa2	651.163	-0.0987698	0.933829	0.0920502	-1.073	0.283272	0.533472	664.992	642.168	729.038	656.992	652.156	696.843	573.214	593.901
AI182371	6.07575	0.0306863	1.0215	0.712408	0.043074	0.965643	NA	5.0302	4.85755	4.14226	10.0374	2.19212	11.3057	7.93681	3.10401
AI197445	1.9657	0.395521	1.31542	1.25812	0.314373	0.753237	NA	3.01812	1.94302	0	1.82498	4.38424	1.02779	3.52747	0
AI413582	19.7169	-0.56193	0.677395	0.404201	-1.39023	0.16446	0.385471	25.151	34.0028	18.6402	16.4248	8.76848	20.5559	17.6374	16.5547
AI427809	1.46041	2.36074	5.13633	1.69732	1.39086	0.164267	NA	0	0	0	1.82498	2.19212	0	3.52747	4.13868
AI429214	23.3804	0.617592	1.53431	0.345621	1.7869	0.073953	0.237422	13.0785	19.4302	24.8536	16.4248	30.6897	32.8894	23.8104	25.8668
AI464131	69.9982	0.383817	1.30479	0.215677	1.77959	0.0751426	0.239584	81.4892	56.3475	46.6004	58.3993	80.0124	85.3068	73.195	78.635
AI467606	3.34843	-0.488714	0.71266	0.999836	-0.488794	0.624987	NA	5.0302	2.91453	3.1067	4.56244	0	8.22234	0.881868	2.06934
AI480526	565.481	-0.164517	0.892227	0.11024	-1.49236	0.135605	0.343072	529.177	593.592	634.801	633.267	508.572	626.954	537.058	460.428
AI504432	277.766	-0.180455	0.882425	0.115618	-1.56078	0.118575	0.317878	319.92	307.968	277.531	275.571	229.077	263.115	265.442	283.5
AI506816	620.003	0.194982	1.14471	0.134642	1.44815	0.147574	0.360896	603.624	707.259	414.226	586.73	700.382	690.677	627.008	630.114
AI593442	32.8997	-0.173675	0.886581	0.333482	-0.520793	0.602511	0.792365	27.1631	29.1453	56.9561	26.4622	24.1133	38.0283	28.2198	33.1095
AI597479	311.201	0.0671573	1.04765	0.111063	0.604679	0.545393	0.751671	323.945	277.852	309.634	303.859	316.761	350.477	282.198	324.887
AI606473	1.4153	1.03417	2.04794	2.17541	0.475393	0.634507	NA	0	0	0	3.64995	7.67242	0	0	0
AI661453	11.9051	0.576878	1.49162	0.519641	1.11015	0.266935	0.514413	11.0664	7.77207	11.3912	8.2124	4.38424	14.3891	19.4011	18.6241
AI837181	142.942	0.578052	1.49283	0.140039	4.12781	3.66241e-05	0.000945439	105.634	118.524	124.268	110.411	173.178	172.669	170.201	168.651
AI849053	33.943	-0.897677	0.53675	0.335639	-2.67453	0.0074834	0.0499441	34.2053	39.8319	42.4582	60.2242	12.0567	25.6948	22.9286	34.1441
AI854703	19.5079	1.0965	2.13835	0.542687	2.0205	0.0433315	0.168381	12.0725	6.80057	21.7469	9.12488	26.3054	52.4174	7.93681	19.6587
AI987944	82.2683	0.382784	1.30386	0.201374	1.90086	0.0573207	0.201471	53.3201	77.7207	88.023	66.6117	95.3572	85.3068	87.3049	104.502
Aida	371.725	0.319199	1.24764	0.127976	2.4942	0.0126241	0.0721396	319.92	404.148	258.891	339.446	416.503	394.672	405.659	434.562
Aif1	8.82515	0.885809	1.8478	0.598901	1.47906	0.139124	NA	2.01208	5.82906	12.4268	4.56244	12.0567	13.3613	7.93681	12.416
Aif1l	805.854	0.0956036	1.06851	0.115963	0.82443	0.409695	0.64896	727.366	824.811	626.517	937.126	759.57	861.29	836.893	873.262
Aifm1	496.303	-0.170575	0.888489	0.097078	-1.75709	0.0789026	0.247361	537.225	556.675	476.36	531.981	508.572	438.867	490.319	430.423
Aifm2	34.7767	0.924319	1.89779	0.327565	2.82179	0.0047757	0.0362467	18.1087	14.5726	24.8536	38.3245	46.0345	37.0005	53.7939	45.5255
Aifm3	63.5612	0.396209	1.31605	0.300613	1.318	0.187503	0.416173	51.308	37.8889	52.8138	77.5615	60.2833	40.0839	88.1868	100.363
Aig1	130.242	0.153154	1.112	0.166681	0.918849	0.358175	0.605133	151.912	108.809	120.126	112.236	144.68	135.669	116.407	152.097
Aim2	97.0791	-0.561809	0.677452	0.240918	-2.33195	0.0197033	0.0979758	111.67	170.986	91.1297	89.4239	55.8991	80.1678	81.1318	96.2244
Aimp1	508.276	-0.42265	0.746053	0.103724	-4.07475	4.60631e-05	0.00114865	564.388	630.51	588.201	546.581	452.673	367.95	482.382	433.527
Aimp2	141.928	-0.153769	0.898899	0.162867	-0.944141	0.345098	0.593543	145.876	133.097	157.406	162.423	113.99	118.196	165.791	138.646
Aip	111.785	-0.440471	0.736894	0.18844	-2.33746	0.0194151	0.0971159	123.743	134.068	136.695	120.448	97.5494	64.7509	97.0055	120.022
Aipl1	2.00926	-0.342147	0.788866	1.28791	-0.26566	0.790501	NA	0	2.91453	5.17783	0.912488	0	3.08338	0.881868	3.10401
Airn	67.9202	0.231847	1.17434	0.198959	1.1653	0.243898	0.48852	62.3744	57.3191	64.205	65.6992	76.7242	69.8899	64.3764	82.7737
Ajap1	73.2079	0.285842	1.21912	0.229539	1.24529	0.213026	0.449118	83.5013	72.8632	61.0983	46.5369	72.34	79.14	68.7857	101.398
Ajm1	23.7815	-0.794338	0.576608	0.436529	-1.81967	0.0688096	0.227101	21.1268	16.5157	53.8494	29.1996	26.3054	14.3891	18.5192	10.3467
Ajuba	438.662	0.457067	1.37275	0.139684	3.27215	0.00106732	0.012231	396.379	439.122	264.069	378.683	561.183	456.34	498.255	515.266
Ak1	156.47	0.0243649	1.01703	0.152834	0.159421	0.873337	0.94395	133.803	145.726	191.58	149.648	169.889	162.391	156.972	141.75
AK157302	1.31778	1.34878	2.54697	1.606	0.839843	0.400997	NA	0	0.971509	2.07113	0	0	2.05559	4.40934	1.03467
Ak2	489.754	-0.104367	0.930213	0.120396	-0.86686	0.386019	0.629802	528.171	525.587	396.621	578.518	442.808	509.785	440.934	495.607
Ak3	335.027	0.191821	1.1422	0.125464	1.5289	0.12629	0.329458	318.914	282.709	329.31	321.196	351.835	365.894	420.651	289.708
Ak3l2-ps	8.11041	-0.045146	0.969192	0.644951	-0.0699991	0.944194	NA	6.03624	11.6581	5.17783	10.0374	10.9606	10.2779	9.70055	1.03467
Ak4	205.052	0.339398	1.26523	0.146699	2.31356	0.0206918	0.101249	221.329	175.843	138.766	187.973	222.5	245.642	224.876	223.489
Ak5	9.63128	-0.478152	0.717897	0.727911	-0.656883	0.511256	0.728816	6.03624	4.85755	23.818	10.0374	9.86454	3.08338	1.76374	17.5894
Ak6	74.3235	0.307334	1.23742	0.216343	1.42059	0.155437	0.372675	66.3986	64.1196	49.7071	84.8614	82.2045	95.5847	67.9038	83.8083
Ak7	49.732	0.93103	1.90664	0.374017	2.48927	0.0128006	0.072751	47.2838	8.74358	36.2448	44.7119	72.34	48.3063	86.4231	53.8029
Ak8	7.74709	1.44006	2.71331	0.665448	2.16404	0.0304614	NA	3.01812	2.91453	5.17783	5.47493	23.0173	7.19455	7.93681	7.2427
Ak9	24.1192	0.870334	1.82809	0.425909	2.04347	0.0410056	0.162033	12.0725	5.82906	24.8536	25.5497	31.7857	24.667	42.3297	25.8668
Akap1	493.992	0.0968354	1.06943	0.101867	0.95061	0.341802	0.589921	473.844	458.552	446.329	531.068	450.481	560.147	531.766	499.746
Akap10	346.725	0.0392024	1.02755	0.108897	0.359996	0.71885	0.862221	376.259	313.798	343.808	333.971	347.451	335.06	327.173	396.279
Akap11	1985.36	-0.118074	0.921417	0.0708585	-1.66633	0.0956472	0.278852	1989.95	2001.31	2266.85	2008.39	2022.23	1878.81	1905.72	1809.64
Akap12	1670.04	0.344622	1.26982	0.133494	2.58154	0.00983595	0.0605347	1406.44	1660.31	1410.44	1409.79	1960.85	1377.24	2384.57	1750.66
Akap13	1209.46	0.124284	1.08997	0.0777902	1.59769	0.110113	0.304204	1200.2	1209.53	1069.74	1149.74	1364.59	1210.74	1293.7	1177.46
Akap14	3.11057	0.835101	1.78398	0.974377	0.857061	0.391411	NA	2.01208	0	5.17783	1.82498	4.38424	2.05559	5.29121	4.13868
Akap17b	172.229	0.40737	1.32627	0.148224	2.74834	0.00598979	0.0426033	147.888	147.669	143.944	153.298	162.217	175.753	220.467	226.593
Akap2	4.73155	-0.596059	0.661559	0.926199	-0.643554	0.519865	NA	0	11.6581	9.32009	1.82498	5.4803	2.05559	4.40934	3.10401
Akap5	183.56	0.306199	1.23645	0.143256	2.13742	0.0325636	0.139407	168.009	155.441	155.335	177.935	219.212	163.419	228.404	200.726
Akap6	1545.02	0.132171	1.09594	0.087361	1.51293	0.130298	0.33527	1366.2	1472.81	1703.5	1355.05	1602.44	1732.86	1525.63	1601.67
Akap7	124.301	0.0734827	1.05225	0.161918	0.453826	0.649954	0.821495	138.833	115.61	127.375	103.111	139.2	127.446	133.162	109.675
Akap8	1897.1	-0.0396115	0.972917	0.0736119	-0.538113	0.590499	0.782797	1873.25	1929.42	1772.89	2116.06	1879.74	1948.69	1891.61	1765.15
Akap8l	877.491	-0.0722271	0.951169	0.0816968	-0.884087	0.376649	0.621644	968.816	873.387	928.902	827.627	831.91	916.791	857.176	815.321
Akap9	7639.23	-0.294718	0.815232	0.0638673	-4.61453	3.93979e-06	0.000153734	8553.35	8125.7	9117.12	7872.95	6824.07	7001.32	7076.11	6543.26
Akip1	37.4917	0.0693254	1.04923	0.326128	0.212571	0.831662	0.922992	38.2295	57.3191	19.6757	31.0246	43.8424	29.806	39.6841	40.3522
Akirin1	340.317	0.0356846	1.02504	0.116426	0.306501	0.759223	0.885506	323.945	355.572	313.776	351.308	363.892	284.699	382.731	346.615
Akirin2	773.557	-0.0462334	0.968462	0.0727475	-0.635532	0.525082	0.736801	749.499	791.78	814.99	787.477	769.434	744.122	759.288	771.864
Akna	1057.47	0.153538	1.11229	0.0982194	1.56322	0.118001	0.317126	1029.18	1104.61	860.555	1009.21	1124.56	1225.13	973.582	1132.96
Akp-ps1	1.6049	-1.66817	0.314653	1.61746	-1.03135	0.302377	NA	4.02416	3.88604	0	1.82498	0	0	0	3.10401
Akr1a1	1187.6	-0.108168	0.927765	0.0700519	-1.54412	0.12256	0.323898	1134.81	1244.5	1282.03	1267.45	1105.92	1143.93	1168.48	1153.66
Akr1b10	24.1885	0.0479586	1.0338	0.36305	0.132099	0.894906	0.95417	37.2235	22.3447	15.5335	20.0747	25.2094	29.806	24.6923	18.6241
Akr1b3	190.831	0.0729006	1.05183	0.132625	0.549675	0.582542	0.777569	184.105	201.102	163.619	194.36	212.636	181.919	179.901	209.003
Akr1b8	19.7775	-0.167804	0.890197	0.369279	-0.454411	0.649533	0.82119	17.1027	27.2023	17.6046	21.8997	16.4409	20.5559	22.9286	14.4854
Akr1c13	6.3327	-0.634945	0.643966	0.914676	-0.694174	0.487573	NA	6.03624	18.4587	6.21339	0	10.9606	2.05559	1.76374	5.17335
Akr1c14	2.30188	0.179714	1.13266	1.12429	0.159846	0.873002	NA	2.01208	0	2.07113	4.56244	1.09606	4.11117	3.52747	1.03467
Akr1c19	3.89662	-0.993713	0.502184	0.885519	-1.12218	0.261785	NA	5.0302	7.77207	4.14226	3.64995	4.38424	2.05559	0	4.13868
Akr1e1	187.86	-0.214518	0.861834	0.136952	-1.56637	0.117262	0.316095	197.184	198.188	234.038	178.848	157.833	177.808	191.365	167.617
Akr7a5	144.207	0.34576	1.27082	0.170889	2.0233	0.0430425	0.167606	92.5556	131.154	144.979	139.611	137.008	155.197	177.255	175.894
Akt1	2304.39	-0.0290773	0.980047	0.0661139	-0.439806	0.660078	0.827774	2152.92	2436.55	2395.26	2326.85	2164.72	2280.67	2386.33	2291.8
Akt1s1	442.905	-0.152142	0.899914	0.0949238	-1.60278	0.108984	0.302261	461.772	450.78	510.534	442.557	398.966	404.95	421.533	452.151
Akt2	654.706	-0.18212	0.881407	0.101507	-1.79417	0.0727865	0.235185	621.732	681.028	830.523	651.517	617.082	592.009	638.472	605.282
Akt2-ps	28.4271	-0.342387	0.788735	0.31108	-1.10064	0.271054	0.519459	31.1872	28.1738	42.4582	25.5497	24.1133	27.7504	26.456	21.7281
Akt3	2815.07	-0.327327	0.797012	0.105228	-3.11066	0.00186671	0.0184019	2958.76	2875.67	3907.19	2792.21	2360.91	2620.87	2667.65	2337.32
Aktip	472.623	0.015034	1.01048	0.0895592	0.167867	0.866688	0.941132	469.82	434.265	482.573	493.656	471.306	463.535	462.981	502.85
AL603804.1	3.70046	-0.553368	0.681427	0.859916	-0.643514	0.519891	NA	7.04227	2.91453	3.1067	4.56244	1.09606	6.16676	2.6456	2.06934
Alad	152.492	0.165256	1.12137	0.200013	0.826226	0.408676	0.648077	105.634	186.53	103.557	178.848	164.409	146.974	168.437	165.547
Alas1	341.634	-0.124919	0.917056	0.096689	-1.29196	0.19637	0.427675	352.114	339.057	366.59	367.733	318.954	338.144	318.354	332.129
Alas2	138.685	0.0677628	1.04809	0.17796	0.380777	0.703369	0.85306	160.966	153.498	101.485	125.923	149.064	116.141	159.618	142.785
Alcam	1000.13	-0.574568	0.671487	0.112204	-5.12074	3.04339e-07	1.85207e-05	1100.61	1193.01	1401.12	1094.07	776.011	750.289	964.764	721.166
Aldh16a1	137.788	-0.0175188	0.98793	0.150095	-0.116718	0.907083	0.958665	155.936	131.154	126.339	141.436	118.374	145.947	145.508	137.611
Aldh18a1	823.259	0.261929	1.19908	0.0766249	3.41833	0.000630067	0.00834331	703.221	777.207	756.998	756.453	954.668	907.541	859.821	870.158
Aldh1a2	53.9336	0.317154	1.24587	0.290829	1.09052	0.275486	0.525317	49.2959	58.2906	53.8494	31.0246	76.7242	47.2785	76.7225	38.2828
Aldh1a3	7.91295	0.561717	1.47602	0.795172	0.706409	0.479934	NA	10.0604	6.80057	3.1067	5.47493	13.1527	18.5003	0	6.20802
Aldh1b1	52.0312	0.2226	1.16683	0.359725	0.618806	0.536044	0.745183	50.302	33.0313	88.023	20.9872	62.4754	46.2507	45.8571	69.3229
Aldh1l1	44.5173	-0.0065067	0.9955	0.374063	-0.0173947	0.986122	0.994183	25.151	39.8319	89.0586	24.6372	52.6109	38.0283	42.3297	44.4908
Aldh1l2	252.955	-0.245819	0.843337	0.16468	-1.4927	0.135515	0.342981	280.685	258.421	354.163	205.31	258.67	195.281	254.86	216.246
Aldh2	484.064	0.409719	1.32843	0.0880479	4.65337	3.26561e-06	0.000135554	416.5	387.632	438.044	420.657	578.72	539.591	532.648	558.722
Aldh3a2	170.212	-0.180196	0.882583	0.137361	-1.31184	0.189574	0.418864	194.166	177.786	178.117	173.373	149.064	187.058	155.209	146.923
Aldh3b1	5.91854	-0.104378	0.930206	0.709344	-0.147147	0.883016	NA	6.03624	5.82906	5.17783	7.29991	7.67242	5.13896	0.881868	9.31204
Aldh4a1	65.0758	0.334225	1.2607	0.274611	1.21709	0.223572	0.462423	57.3442	59.2621	79.7385	34.6746	51.5148	61.6676	92.5961	83.8083
Aldh5a1	285.086	0.217394	1.16263	0.139429	1.55917	0.118955	0.318167	216.298	317.684	230.931	289.259	301.417	336.088	314.827	274.188
Aldh6a1	122.764	-0.324749	0.798437	0.164818	-1.97034	0.048799	0.181711	154.93	115.61	126.339	149.648	98.6454	104.835	123.462	108.64
Aldh7a1	441.961	0.0138273	1.00963	0.0955603	0.144697	0.88495	0.949546	470.826	464.381	423.546	400.582	435.136	461.479	422.415	457.324
Aldh8a1	3.19806	0.289235	1.22199	1.10036	0.262854	0.792663	NA	3.01812	3.88604	0	4.56244	0	9.25013	1.76374	3.10401
Aldh9a1	171.384	0.144348	1.10523	0.148527	0.971863	0.331119	0.579159	169.015	133.097	156.37	192.535	189.618	159.308	186.956	184.171
Aldoa	1119.91	0.0708251	1.05032	0.117457	0.602987	0.546517	0.752237	1067.41	1186.21	935.115	1179.85	1091.68	1051.43	1017.68	1429.92
Aldob	3.50539	-1.86047	0.275387	1.38751	-1.34087	0.179963	NA	18.1087	3.88604	0	0	0	1.02779	0.881868	4.13868
Aldoc	863.162	-0.5792	0.669335	0.116166	-4.98598	6.16496e-07	3.38755e-05	1008.05	972.481	1092.52	1065.79	603.929	657.787	881.868	622.872
Alg1	92.8112	0.180897	1.13359	0.18886	0.957836	0.338146	0.586154	70.4227	91.3219	107.699	78.474	111.798	98.6681	89.9505	94.155
Alg10b	900.77	-0.0541677	0.96315	0.0790439	-0.685287	0.493163	0.715241	962.78	898.646	883.337	924.351	939.324	916.791	802.5	878.435
Alg11	229.376	0.0111655	1.00777	0.13796	0.0809333	0.935495	0.97096	190.141	278.823	209.184	235.422	238.941	237.42	231.931	213.142
Alg12	87.0692	-0.166148	0.891219	0.206497	-0.804604	0.421048	0.658145	67.4046	116.581	96.3076	87.5989	94.2612	76.0567	71.4313	86.9123
Alg13	295.276	-0.192644	0.875001	0.114668	-1.68002	0.0929531	0.274271	332.999	303.111	303.421	319.371	278.399	310.393	237.222	277.292
Alg14	74.1945	-0.0567202	0.961447	0.198081	-0.286349	0.774611	0.892767	88.5315	68.0057	74.5607	72.0866	65.7636	68.8621	86.4231	69.3229
Alg2	555.695	-0.13988	0.907594	0.121802	-1.14843	0.250793	0.49649	613.684	483.812	697.971	536.543	499.803	511.841	603.198	498.711
Alg3	100.057	0.200537	1.14913	0.175903	1.14005	0.254266	0.500521	87.5254	91.3219	93.2009	100.374	93.1651	97.6403	105.824	131.403
Alg5	126.171	-0.155356	0.897911	0.208802	-0.744034	0.456856	0.68718	103.622	178.758	144.979	104.936	129.335	106.89	144.626	96.2244
Alg6	130.483	-0.0465666	0.968238	0.15559	-0.299291	0.764718	0.887233	133.803	136.983	112.877	145.998	124.951	136.696	112.879	139.681
Alg8	126.393	0.0424626	1.02987	0.191543	0.221687	0.824557	0.918615	149.9	118.524	118.054	111.324	141.392	99.6959	106.706	165.547
Alg9	183.518	0.190509	1.14117	0.141465	1.34669	0.178081	0.404028	170.021	175.843	186.402	154.211	190.714	211.725	217.821	161.409
Alk	57.6845	-0.832751	0.561458	0.263225	-3.16365	0.00155804	0.0162705	89.5375	54.4045	91.1297	61.1367	37.266	43.1673	53.7939	31.0401
Alkbh1	521.099	0.250562	1.18967	0.0967539	2.58968	0.0096065	0.0597265	526.159	464.381	415.262	497.306	573.239	596.12	545.876	550.445
Alkbh2	47.9318	-0.318436	0.801939	0.299572	-1.06297	0.287795	0.538589	37.2235	70.9202	46.6004	58.3993	28.4976	52.4174	57.3214	32.0748
Alkbh3	115.019	-0.271353	0.828542	0.15879	-1.70889	0.0874722	0.263323	138.833	135.04	118.054	111.324	110.702	98.6681	104.06	103.467
Alkbh4	58.9839	0.125775	1.09109	0.274703	0.457859	0.647054	0.81955	43.2597	87.4358	46.6004	48.3619	54.803	80.1678	62.6126	48.6295
Alkbh5	1291.66	0.341258	1.26686	0.0665097	5.13096	2.88269e-07	1.77349e-05	1127.77	1165.81	1089.41	1174.37	1409.53	1504.69	1392.47	1469.23
Alkbh6	98.5879	-0.0213408	0.985317	0.173919	-0.122706	0.90234	0.956635	85.5133	108.809	109.77	93.0738	104.126	87.3624	93.478	106.571
Alkbh7	31.3357	0.178115	1.13141	0.325437	0.547312	0.584165	0.778378	28.1691	36.9174	36.2448	16.4248	36.17	25.6948	31.7472	39.3175
Alkbh8	738.745	0.187043	1.13843	0.0933052	2.00464	0.0450018	0.172624	658.956	688.8	752.856	662.467	776.011	855.124	686.975	828.771
Alms1	1626.88	0.0788495	1.05618	0.113349	0.695636	0.486657	0.710062	1605.64	1766.2	1204.36	1751.98	1702.18	1726.69	1493.88	1764.11
Alms1-ps1	20.2329	0.00542271	1.00377	0.382438	0.0141793	0.988687	0.995013	16.0966	18.4587	17.6046	28.2871	25.2094	25.6948	14.9918	15.5201
Alms1-ps2	4.30814	0.317392	1.24608	0.830337	0.382245	0.70228	NA	1.00604	6.80057	1.03557	6.38742	6.57636	4.11117	4.40934	4.13868
Alox12	14.1723	-0.335775	0.792358	0.452809	-0.741538	0.458368	0.688164	11.0664	20.4017	13.4623	18.2498	15.3448	15.4169	13.228	6.20802
Alox15	1.65762	0.689761	1.61302	1.33308	0.517421	0.604862	NA	2.01208	0	3.1067	0	3.28818	2.05559	1.76374	1.03467
Alox5	2.22329	0.359986	1.28341	1.10918	0.324551	0.745521	NA	0	3.88604	2.07113	1.82498	2.19212	1.02779	2.6456	4.13868
Alox5ap	8.30492	-0.0169315	0.988333	0.630531	-0.0268527	0.978577	NA	6.03624	7.77207	4.14226	15.5123	7.67242	5.13896	14.9918	5.17335
Alpk1	129.405	-0.690694	0.619556	0.202682	-3.40777	0.000654969	0.00857872	173.039	164.185	175.011	127.748	113.99	69.8899	129.635	81.739
Alpk3	5.0038	0.3254	1.25301	0.726869	0.447673	0.654389	NA	4.02416	5.82906	5.17783	2.73747	7.67242	2.05559	5.29121	7.2427
Alpl	101	0.402596	1.32188	0.217113	1.85432	0.0636941	0.216296	119.719	84.5213	71.454	72.0866	111.798	120.252	86.4231	141.75
Als2	720.29	0.353459	1.27762	0.0815107	4.33635	1.44868e-05	0.000448903	648.895	613.994	683.473	583.993	816.565	821.206	771.634	822.563
Als2cl	18.2474	-0.371063	0.773213	0.386742	-0.959457	0.337328	0.585316	22.1329	16.5157	23.818	20.0747	17.537	14.3891	21.1648	10.3467
Alx1	10.9467	-0.0769239	0.948077	0.602321	-0.127712	0.898377	0.955152	5.0302	23.3162	8.28452	8.2124	17.537	4.11117	9.70055	11.3814
Alx3	39.8434	0.637638	1.55578	0.307902	2.07091	0.0383668	0.155356	27.1631	30.1168	25.8891	41.062	71.2439	32.8894	39.6841	50.6989
Alx4	99.2372	0.654105	1.57364	0.216527	3.02089	0.0025203	0.0227901	80.4831	82.5783	63.1695	82.124	146.872	76.0567	138.453	124.16
Alyref	1148.16	-0.323355	0.799209	0.0931421	-3.47163	0.00051731	0.00720434	1253.52	1305.71	1107.02	1438.99	1010.57	951.736	1118.21	999.492
Alyref2	66.1479	0.613242	1.52969	0.208448	2.94194	0.00326166	0.0272862	45.2718	47.604	54.885	61.1367	75.6282	89.418	71.4313	83.8083
Amacr	37.3513	0.683261	1.60577	0.388926	1.75679	0.078954	0.247457	18.1087	32.0598	52.8138	11.8623	60.2833	40.0839	37.0385	46.5602
Ambra1	904.571	-0.0802111	0.945919	0.082134	-0.976587	0.328774	0.577426	834.007	943.336	976.538	964.5	931.651	889.041	880.104	817.39
Amd1	431.167	0.145959	1.10647	0.122876	1.18785	0.234892	0.477865	400.404	465.353	315.847	455.332	423.079	463.535	461.217	464.567
Amd2	5.65369	0.580502	1.49537	0.75593	0.767932	0.442528	NA	1.00604	4.85755	2.07113	10.0374	5.4803	10.2779	5.29121	6.20802
Amdhd1	1.76848	0.490744	1.40517	1.33205	0.368412	0.712566	NA	2.01208	2.91453	0	0.912488	3.28818	0	0.881868	4.13868
Amdhd2	166.465	0.237755	1.17916	0.156431	1.51987	0.128544	0.332519	146.882	174.872	127.375	162.423	154.544	176.78	216.058	172.79
Amd-ps3	4.74889	-1.36926	0.387089	0.82986	-1.64999	0.0989445	NA	10.0604	8.74358	5.17783	3.64995	1.09606	2.05559	6.17308	1.03467
Amer1	572.243	0.28014	1.21431	0.100195	2.79595	0.0051748	0.038428	453.724	519.757	545.743	547.493	592.969	690.677	570.569	657.016
Amer2	1218.87	-0.221911	0.857429	0.11695	-1.89749	0.0577635	0.202647	1315.9	1145.41	1666.22	1123.27	1040.16	1187.1	1124.38	1148.48
Amer3	118.29	-0.538443	0.688514	0.211802	-2.54219	0.0110159	0.0657792	130.785	109.781	207.113	113.149	90.973	107.918	93.478	93.1204
Amfr	823.346	0.167339	1.12299	0.0743074	2.25199	0.0243231	0.113488	780.686	791.78	738.358	792.04	822.045	863.346	894.214	904.302
Amh	8.25443	-1.00764	0.49736	0.638389	-1.57841	0.114472	NA	4.02416	9.71509	9.32009	20.9872	3.28818	6.16676	5.29121	7.2427
Amhr2	5.82168	1.74535	3.35277	0.892549	1.95547	0.0505273	NA	3.01812	0	3.1067	4.56244	1.09606	7.19455	7.93681	19.6587
Amigo1	263.109	0.382363	1.30348	0.128665	2.97178	0.00296082	0.0254906	187.123	232.191	255.785	238.159	311.281	327.866	268.97	283.5
Amigo2	18.5315	0.218351	1.1634	0.497786	0.438643	0.66092	0.828152	21.1268	26.2308	17.6046	3.64995	29.5936	13.3613	21.1648	15.5201
Amigo3	29.5646	0.827358	1.77443	0.375674	2.20233	0.0276419	0.124024	10.0604	13.6011	25.8891	35.587	30.6897	41.1117	42.3297	37.2481
Ammecr1	242.247	-0.0335261	0.977029	0.122829	-0.272948	0.784893	0.897987	235.413	268.137	240.251	236.334	266.343	204.531	246.923	240.044
Ammecr1l	692.348	0.21271	1.15886	0.0783864	2.7136	0.00665564	0.0460756	613.684	672.284	659.655	619.58	755.185	735.9	711.667	770.83
Amn	4.04794	-0.226771	0.854546	0.846499	-0.267892	0.788782	NA	6.03624	3.88604	2.07113	5.47493	1.09606	8.22234	3.52747	2.06934
Amn1	678.713	-0.186188	0.878925	0.114304	-1.62888	0.103338	0.292816	758.554	640.225	838.808	653.342	676.269	540.619	701.085	620.802
Amot	522.526	0.205558	1.15313	0.0901215	2.2809	0.0225541	0.107765	467.808	497.413	511.569	464.457	588.584	594.064	537.939	518.37
Amotl1	1625.93	0.259158	1.19678	0.0726493	3.56725	0.00036075	0.00549834	1505.03	1610.76	1372.12	1432.61	1818.36	1840.78	1738.16	1689.62
Amotl2	1436.55	-0.0323703	0.977812	0.0806458	-0.401388	0.688134	0.844512	1523.14	1491.27	1272.71	1523.86	1327.33	1416.3	1502.7	1435.09
Ampd1	1.94982	0.731133	1.65994	1.40947	0.518729	0.60395	NA	0	4.85755	1.03557	0	2.19212	0	4.40934	3.10401
Ampd2	281.872	0.0247948	1.01733	0.121143	0.204674	0.837827	0.926096	277.667	265.222	330.345	245.459	264.15	301.143	287.489	283.5
Ampd3	15.923	0.127199	1.09217	0.419603	0.303141	0.761783	0.886317	14.0845	10.6866	19.6757	16.4248	18.633	10.2779	15.8736	21.7281
Amph	201.015	-0.35159	0.78372	0.166876	-2.10689	0.0351268	0.146459	186.117	238.991	265.105	212.61	153.448	169.586	230.168	152.097
Amt	113.753	-0.238029	0.847903	0.175319	-1.35769	0.174562	0.398818	137.827	94.2364	141.872	118.623	106.318	114.085	98.7692	98.2937
Amy1	14.5609	0.467305	1.38252	0.54148	0.863015	0.388129	0.631412	15.0906	5.82906	19.6757	8.2124	26.3054	19.5281	5.29121	16.5547
Amz1	34.3153	0.415801	1.33404	0.324501	1.28135	0.200069	0.433068	17.1027	38.8604	36.2448	25.5497	27.4015	50.3618	39.6841	39.3175
Amz2	519.465	0.0163976	1.01143	0.0865624	0.189431	0.849755	0.931478	516.098	486.726	561.276	502.781	508.572	515.952	533.53	530.786
Anapc1	2537.91	-0.163784	0.892681	0.076665	-2.13636	0.0326504	0.139586	2704.23	2822.23	2325.88	2874.34	2382.83	2331.03	2473.64	2389.05
Anapc10	137.713	0.0640179	1.04537	0.166704	0.384021	0.700963	0.852421	137.827	161.271	128.41	111.324	120.567	165.475	134.044	142.785
Anapc11	265.34	0.0347642	1.02439	0.14052	0.247396	0.804602	0.907773	306.842	284.652	259.927	198.01	263.054	273.393	287.489	249.356
Anapc13	201.133	-0.0417282	0.971491	0.122882	-0.339579	0.734174	0.872192	201.208	202.074	223.682	189.798	191.811	188.086	205.475	206.934
Anapc15	289.924	0.0952043	1.06822	0.109391	0.870309	0.384132	0.628305	273.643	286.595	265.105	295.646	275.111	323.755	283.961	315.575
Anapc15-ps	5.54916	0.579141	1.49396	0.717125	0.807587	0.419328	NA	6.03624	4.85755	4.14226	2.73747	4.38424	10.2779	2.6456	9.31204
Anapc16	305.242	-0.27359	0.827258	0.105924	-2.58289	0.00979777	0.060388	342.053	341	345.879	307.509	295.936	253.865	274.261	281.43
Anapc2	1205.03	-0.0448005	0.969424	0.0755112	-0.593297	0.552983	0.756781	1125.76	1280.45	1289.28	1199.01	1178.26	1264.19	1127.91	1175.39
Anapc4	1002.3	-0.181411	0.88184	0.0821305	-2.20881	0.0271877	0.122705	1063.38	1148.32	1037.64	1011.95	1009.47	867.457	990.338	889.817
Anapc5	2393.1	-0.339113	0.790527	0.0670341	-5.05881	4.2189e-07	2.44906e-05	2578.48	2793.09	2595.13	2726.52	2141.7	2004.2	2278.75	2026.92
Anapc7	536.164	-0.0791531	0.946613	0.0904796	-0.874817	0.381674	0.626112	563.382	560.561	508.462	571.218	522.821	471.757	552.049	539.063
Ang	5.03535	0.175074	1.12902	0.806018	0.217208	0.828046	NA	10.0604	4.85755	3.1067	0.912488	7.67242	7.19455	4.40934	2.06934
Angel1	96.9272	-0.187083	0.87838	0.180732	-1.03514	0.300602	0.550967	92.5556	103.951	123.232	93.0738	87.6848	86.3346	82.0137	106.571
Angel2	502.536	0.0621802	1.04404	0.0871428	0.713544	0.475509	0.701599	454.73	495.47	509.498	507.344	522.821	496.424	535.294	498.711
Angpt1	65.236	0.366784	1.28948	0.254278	1.44245	0.149175	0.36323	35.2114	58.2906	60.0628	73.9116	89.8769	83.2512	64.3764	56.9069
Angpt2	22.3419	0.490863	1.40529	0.35008	1.40215	0.160872	0.380392	22.1329	22.3447	12.4268	17.3373	29.5936	27.7504	26.456	20.6934
Angptl1	7.50448	-1.16339	0.446464	0.698745	-1.66496	0.09592	NA	6.03624	13.6011	5.17783	16.4248	8.76848	2.05559	1.76374	6.20802
Angptl2	218.392	0.27938	1.21367	0.176004	1.58735	0.112433	0.307626	184.105	229.276	176.046	199.835	255.382	155.197	268.97	278.326
Angptl4	47.5322	0.370567	1.29286	0.255096	1.45266	0.146319	0.359058	53.3201	47.604	33.1381	31.9371	58.0912	49.3341	58.2033	48.6295
Angptl6	20.0531	-0.649704	0.637411	0.388424	-1.67267	0.0943927	0.276892	32.1933	25.2592	26.9247	13.6873	18.633	12.3335	15.8736	15.5201
Ank	187.35	-0.00704248	0.99513	0.14314	-0.0491997	0.96076	0.982679	207.244	184.587	206.077	154.211	192.907	166.502	207.239	180.033
Ank1	198.433	-0.140046	0.90749	0.186443	-0.751145	0.452565	0.683838	179.075	177.786	300.314	175.198	179.754	209.67	158.736	206.934
Ank2	4860.7	-0.335195	0.792677	0.119684	-2.80067	0.00509971	0.038038	5040.26	4835.2	7226.17	4590.73	4371.09	4332.15	4397.88	4092.12
Ank3	4958.49	-0.390902	0.762653	0.125466	-3.1156	0.0018357	0.0182321	5136.84	4980.93	7653.86	4733.99	4134.34	4477.07	4291.17	4259.74
Ankef1	12.7598	0.965867	1.95324	0.500754	1.92883	0.0537523	0.193695	11.0664	3.88604	13.4623	6.38742	12.0567	13.3613	21.1648	20.6934
Ankfn1	57.0324	0.610352	1.52663	0.348304	1.75235	0.0797129	0.248699	42.2536	83.5498	28.9958	25.5497	78.9163	80.1678	42.3297	74.4963
Ankfy1	1173.51	-0.0555193	0.962248	0.0712767	-0.778926	0.436023	0.67069	1186.12	1223.13	1215.75	1160.69	1158.54	1068.9	1233.73	1141.24
Ankhd1	1904.85	-0.0997587	0.933189	0.0654576	-1.52402	0.127504	0.331094	2033.21	1972.16	1879.55	1997.44	1731.78	1924.03	1787.55	1913.11
Ankib1	955.506	0.213236	1.15929	0.0862358	2.47271	0.0134092	0.0752178	884.309	880.187	941.329	835.839	911.922	1119.27	1082.05	989.145
Ankle1	214.051	-0.22311	0.856717	0.162907	-1.36955	0.170827	0.394415	215.292	257.45	166.726	281.959	224.692	185.003	194.011	187.275
Ankle2	699.771	0.110981	1.07996	0.0906253	1.22462	0.22072	0.459002	674.046	762.635	597.521	656.992	747.513	704.038	742.533	712.888
Ankmy1	4.40423	-0.213303	0.86256	0.827312	-0.257826	0.796541	NA	11.0664	2.91453	3.1067	1.82498	4.38424	3.08338	2.6456	6.20802
Ankmy2	275.1	-0.0596054	0.959527	0.137442	-0.433677	0.664523	0.83026	317.908	231.219	298.243	276.484	272.919	285.726	298.953	219.35
Ankra2	208.136	-0.129907	0.913891	0.127294	-1.02053	0.307479	0.55727	204.226	230.248	223.682	211.697	178.658	210.698	183.429	222.454
Ankrd10	1293.52	-0.0826787	0.944303	0.0853534	-0.968664	0.332713	0.581076	1359.16	1288.22	1187.79	1486.44	1275.81	1310.44	1286.65	1153.66
Ankrd11	5357.99	-0.0613206	0.958386	0.0586989	-1.04466	0.296179	0.54599	5201.22	5694.99	5583.77	5407.41	5010.09	5508.97	5135.12	5322.35
Ankrd12	1063.57	-0.0441697	0.969848	0.108091	-0.408634	0.682808	0.842138	1009.06	990.94	1352.45	968.15	1051.12	1057.6	1095.28	983.972
Ankrd13a	640.97	-0.138676	0.908353	0.0940548	-1.47441	0.140371	0.349709	672.034	759.72	598.557	656.992	575.432	594.064	636.709	634.253
Ankrd13b	1279.81	-0.103293	0.930906	0.0925767	-1.11576	0.264526	0.511802	1161.98	1352.34	1515.03	1273.83	1158.54	1347.44	1242.55	1186.77
Ankrd13c	598.166	-0.0305086	0.979075	0.0931486	-0.327526	0.74327	0.876665	673.04	601.364	542.636	601.33	561.183	565.286	615.544	624.941
Ankrd13d	97.0714	-0.16505	0.891898	0.176968	-0.932651	0.351	0.598564	101.61	91.3219	106.663	111.324	73.436	91.4736	101.415	99.3284
Ankrd16	497.466	-0.293019	0.816193	0.0860586	-3.40487	0.000661949	0.00864328	517.104	568.333	537.458	568.48	441.712	433.729	463.863	449.047
Ankrd17	3755.94	-0.0437962	0.970099	0.0548471	-0.798514	0.424572	0.660851	3742.47	3887.98	3732.18	3887.2	3814.29	3793.58	3547.75	3642.04
Ankrd23	9.07015	0.0776515	1.0553	0.536827	0.144649	0.884988	NA	8.04831	13.6011	7.24896	6.38742	7.67242	9.25013	7.93681	12.416
Ankrd24	182.475	-0.0717114	0.951509	0.147948	-0.484705	0.627885	0.807651	193.16	152.527	189.508	212.61	200.579	177.808	182.547	151.062
Ankrd26	893.403	-0.0474625	0.967637	0.0836933	-0.567101	0.570646	0.768492	925.556	943.336	793.243	969.063	880.136	915.763	851.003	869.123
Ankrd27	498.554	-0.0114848	0.992071	0.0875584	-0.131167	0.895643	0.954523	479.881	498.384	522.96	500.956	530.493	479.979	507.074	468.706
Ankrd28	983.59	-0.294342	0.815444	0.072453	-4.06253	4.85434e-05	0.00119985	1087.53	1103.63	1031.42	1111.41	893.289	823.262	894.214	923.961
Ankrd29	22.9213	0.258488	1.19622	0.432398	0.597801	0.549972	0.754835	25.151	24.2877	27.9603	6.38742	15.3448	23.6392	26.456	34.1441
Ankrd33b	9.93074	-0.027743	0.980954	0.606536	-0.0457401	0.963517	0.984498	11.0664	19.4302	5.17783	4.56244	10.9606	6.16676	15.8736	6.20802
Ankrd34a	42.1686	0.200879	1.1494	0.288071	0.697324	0.4856	0.709558	32.1933	37.8889	48.6716	38.3245	35.0739	66.8065	43.2115	35.1788
Ankrd34b	5.00046	1.43817	2.70977	0.728852	1.9732	0.0484729	NA	2.01208	2.91453	3.1067	2.73747	8.76848	6.16676	7.05494	7.2427
Ankrd35	5.06455	0.252629	1.19138	0.70633	0.357664	0.720595	NA	3.01812	7.77207	3.1067	4.56244	4.38424	5.13896	5.29121	7.2427
Ankrd37	33.1518	0.0634683	1.04497	0.316653	0.200435	0.841141	0.92786	39.2355	28.1738	30.0314	31.9371	32.8818	38.0283	19.4011	45.5255
Ankrd39	74.5133	0.625588	1.54284	0.206408	3.03083	0.00243881	0.0222824	60.3624	43.7179	57.9916	72.0866	98.6454	93.5291	89.0687	80.7043
Ankrd40	732.802	0.602551	1.5184	0.082466	7.30667	2.73849e-13	6.88996e-11	529.177	606.222	616.161	576.693	848.351	858.207	899.505	928.1
Ankrd42	184.847	0.0183206	1.01278	0.129047	0.141968	0.887105	0.95039	197.184	180.701	188.473	168.81	167.697	189.114	186.074	200.726
Ankrd44	378.416	-0.0824307	0.944465	0.0923569	-0.892523	0.372113	0.617636	383.301	385.689	405.942	382.333	374.853	352.533	377.439	365.239
Ankrd45	91.2409	-0.0168527	0.988387	0.180337	-0.0934513	0.925545	0.967121	84.5073	93.2649	96.3076	93.0738	104.126	74.0011	98.7692	85.8777
Ankrd46	379.614	0.0229889	1.01606	0.114739	0.200359	0.8412	0.92786	370.222	386.661	422.511	328.496	336.49	370.005	424.178	398.348
Ankrd49	196.285	0.214089	1.15997	0.13855	1.54521	0.122294	0.323324	215.292	180.701	155.335	175.198	229.077	198.364	194.893	221.42
Ankrd50	1143.04	0.237073	1.1786	0.085233	2.78147	0.00541137	0.0396959	961.774	1112.38	1156.73	966.325	1257.18	1280.63	1149.07	1260.23
Ankrd52	997.702	-0.134967	0.91069	0.0743704	-1.8148	0.0695547	0.228554	993.967	1030.77	1059.38	1093.16	999.607	927.069	986.81	890.852
Ankrd54	236.992	-0.232716	0.851031	0.122699	-1.89664	0.0578753	0.202955	259.558	266.194	233.002	265.534	188.522	244.615	216.058	222.454
Ankrd55	7.40364	0.404555	1.32368	0.818179	0.494458	0.620983	NA	0	17.4872	6.21339	1.82498	9.86454	6.16676	11.4643	6.20802
Ankrd6	653.897	-0.260719	0.834672	0.120817	-2.15796	0.0309312	0.134615	620.726	664.512	888.515	678.891	580.912	558.091	680.802	558.722
Ankrd61	5.63282	0.341111	1.26673	0.804735	0.42388	0.671653	NA	4.02416	4.85755	7.24896	3.64995	8.76848	6.16676	0	10.3467
Ankrd63	5.51401	-2.59534	0.165472	0.99776	-2.60117	0.00929062	NA	2.01208	7.77207	19.6757	8.2124	4.38424	2.05559	0	0
Ankrd66	5.01648	0.325083	1.25274	0.987639	0.329152	0.742041	NA	1.00604	0.971509	11.3912	4.56244	0	10.2779	8.81868	3.10401
Ankrd7	1.58807	0.200777	1.14932	1.48269	0.135414	0.892285	NA	0	3.88604	2.07113	0	2.19212	1.02779	3.52747	0
Ankrd9	64.0551	0.664873	1.58543	0.22682	2.93128	0.00337563	0.0280063	57.3442	60.2336	34.1736	46.5369	69.0518	76.0567	87.3049	81.739
Anks1	917.5	0.115147	1.08309	0.0737181	1.56199	0.118291	0.317419	831.994	881.159	874.017	936.213	937.131	990.792	970.937	917.753
Anks1b	447.359	-0.584432	0.666912	0.130755	-4.46967	7.83389e-06	0.000271162	537.225	511.985	637.908	461.719	328.818	358.7	432.115	310.401
Anks3	428.238	-0.110644	0.926174	0.0998427	-1.10819	0.267781	0.515191	435.615	404.148	446.329	492.744	411.023	414.2	440.052	381.794
Anks6	135.079	0.241462	1.18219	0.158303	1.52531	0.127181	0.330711	125.755	113.667	150.157	105.849	158.929	150.058	137.571	138.646
Ankzf1	203.58	-0.124504	0.917319	0.135816	-0.91671	0.359295	0.606027	187.123	245.792	215.398	200.747	186.33	214.809	174.61	203.83
Anln	696.146	-0.115433	0.923105	0.134528	-0.858066	0.390856	0.633381	716.3	760.692	521.925	896.064	633.523	713.288	645.527	681.848
Ano1	112.19	0.712978	1.63918	0.436578	1.63311	0.102447	0.291579	87.5254	124.353	39.3515	88.5114	202.771	142.863	71.4313	140.715
Ano10	262.221	-0.0128679	0.99112	0.106901	-0.120372	0.904189	0.957508	265.594	250.649	260.962	276.484	253.19	266.198	268.088	256.598
Ano3	37.3436	2.07317	4.20811	0.347876	5.95951	2.52995e-09	3.11295e-07	8.04831	22.3447	9.32009	17.3373	66.8597	42.1395	58.2033	74.4963
Ano4	35.8096	-0.396747	0.759569	0.343496	-1.15502	0.24808	0.493031	31.1872	45.6609	63.1695	22.8122	41.6503	26.7226	27.3379	27.9361
Ano5	4.89034	0.433083	1.35012	0.819056	0.528759	0.596972	NA	8.04831	3.88604	2.07113	2.73747	7.67242	2.05559	10.5824	2.06934
Ano6	643.058	-0.0609074	0.958661	0.0940657	-0.647498	0.51731	0.732202	623.744	688.8	579.916	733.641	603.929	616.676	655.228	642.531
Ano8	1026.63	-0.145101	0.904316	0.087361	-1.66093	0.0967271	0.280737	1062.38	960.823	1221.97	1067.61	991.934	1026.76	922.434	959.14
Anp32a	4676.38	-0.124913	0.917059	0.0648356	-1.92661	0.054028	0.194241	4835.02	5007.16	4457.07	5214.87	4320.67	4631.23	4518.69	4426.32
Anp32b	4583.18	0.140564	1.10234	0.103542	1.35756	0.174602	0.398818	4524.16	4797.31	3361.44	4755.89	4858.83	4967.32	4427.86	4972.63
Anp32b-ps1	58.7221	0.258629	1.19634	0.213897	1.20913	0.226614	0.467224	49.2959	57.3191	48.6716	58.3993	71.2439	64.7509	65.2582	54.8376
Anp32e	2912.8	-0.0963653	0.935387	0.0939562	-1.02564	0.305061	0.555088	2979.89	3339.08	2436.68	3283.13	2871.68	2885.01	2726.74	2780.16
Anp32-ps	14.3916	-0.0134303	0.990734	0.415867	-0.0322948	0.974237	0.988899	16.0966	10.6866	15.5335	15.5123	13.1527	17.4725	13.228	13.4507
Anpep	68.1732	0.0232987	1.01628	0.228263	0.102069	0.918702	0.964405	62.3744	68.9772	70.4184	69.3491	59.1872	50.3618	94.3599	70.3576
Antxr1	443.614	0.182768	1.13506	0.0911789	2.00449	0.0450173	0.172624	428.573	401.233	425.617	407.882	455.961	448.118	509.72	471.81
Antxr2	214.193	0.732081	1.66103	0.15728	4.65465	3.24536e-06	0.000135079	153.924	168.071	141.872	178.848	305.801	281.615	195.775	287.638
Anxa1	6.21069	0.352286	1.27658	0.937775	0.375661	0.707169	NA	0	13.6011	8.28452	0	4.38424	6.16676	7.93681	9.31204
Anxa11	13.8913	0.770658	1.70605	0.454149	1.69693	0.0897102	0.268034	6.03624	7.77207	14.4979	12.7748	16.4409	13.3613	18.5192	21.7281
Anxa2	241.683	0.214686	1.16045	0.132336	1.62228	0.104743	0.295162	195.172	244.82	216.433	239.072	236.749	237.42	305.126	258.668
Anxa3	72.5753	0.556466	1.47066	0.248883	2.23586	0.025361	0.11687	48.2899	63.1481	68.3473	55.6618	96.4533	61.6676	120.816	66.2189
Anxa4	26.5506	0.639492	1.55778	0.371383	1.72192	0.0850839	0.259125	31.1872	8.74358	25.8891	17.3373	31.7857	34.945	27.3379	35.1788
Anxa5	133.26	0.108893	1.0784	0.179322	0.607245	0.543688	0.750733	101.61	160.299	136.695	114.974	124.951	133.613	166.673	127.265
Anxa6	351.894	0.290089	1.22272	0.168851	1.71802	0.0857924	0.26013	277.667	303.111	354.163	332.146	438.424	261.059	494.728	353.857
Anxa7	100.02	0.460366	1.37589	0.189487	2.42954	0.015118	0.0817434	74.4469	72.8632	109.77	80.299	101.934	105.863	128.753	126.23
Anxa9	18.5421	0.576592	1.49132	0.386485	1.49189	0.135729	0.343256	13.0785	20.4017	10.3557	15.5123	28.4976	21.5836	20.283	18.6241
Aoah	3.40058	0.884051	1.84555	0.968077	0.913204	0.361135	NA	3.01812	1.94302	0	4.56244	5.4803	4.11117	7.05494	1.03467
Aoc2	73.9015	-0.773961	0.58481	0.244705	-3.16283	0.00156244	0.0162983	93.5617	92.2934	83.8808	104.024	29.5936	50.3618	72.3132	65.1843
Aoc3	1.64646	-1.12184	0.459507	1.32861	-0.844369	0.398463	NA	5.0302	0.971509	2.07113	0.912488	1.09606	2.05559	0	1.03467
Aox1	8.49255	0.593243	1.50863	0.694327	0.854415	0.392875	NA	4.02416	7.77207	7.24896	8.2124	8.76848	3.08338	24.6923	4.13868
Aox4	5.57566	-2.98785	0.126057	1.04632	-2.85559	0.00429568	NA	7.04227	1.94302	27.9603	2.73747	1.09606	1.02779	1.76374	1.03467
Ap1ar	984.319	-0.205917	0.866988	0.0705277	-2.91965	0.00350419	0.028857	1108.66	1041.46	1007.6	1060.31	925.075	918.847	938.307	874.297
Ap1b1	661.763	-0.10335	0.930869	0.103339	-1.0001	0.31726	0.56678	559.358	689.772	745.607	746.415	677.365	641.343	621.717	612.525
Ap1g1	1336.5	-0.163345	0.892952	0.0763465	-2.13952	0.0323936	0.138805	1359.16	1511.67	1477.75	1299.38	1339.39	1214.85	1216.1	1273.68
Ap1g2	66.4845	-0.033463	0.977072	0.236306	-0.141609	0.887389	0.950484	63.3805	65.0911	69.3829	71.1741	43.8424	67.8343	59.0852	92.0857
Ap1m1	903.227	-0.236138	0.849015	0.095761	-2.46591	0.0136664	0.0761066	951.713	931.677	1035.57	990.05	885.617	725.622	940.953	764.622
Ap1s1	278.565	0.0321277	1.02252	0.125558	0.25588	0.798044	0.904808	298.794	251.621	298.243	254.584	258.67	253.865	327.173	285.569
Ap1s2	385.196	-0.418492	0.748206	0.120506	-3.47279	0.000515072	0.00718162	385.313	443.98	526.067	407.882	333.202	290.865	340.401	353.857
Ap1s3	6.63618	-0.410378	0.752426	0.703672	-0.583195	0.559762	NA	10.0604	5.82906	4.14226	10.0374	13.1527	3.08338	2.6456	4.13868
Ap2a1	965.735	-0.306562	0.808566	0.0799575	-3.83406	0.000126045	0.00249164	967.81	1099.75	1144.3	1060.31	894.385	861.29	888.923	809.113
Ap2a2	1406.05	-0.247765	0.8422	0.080277	-3.08638	0.00202611	0.0195166	1361.17	1489.32	1670.37	1584.99	1341.58	1210.74	1298.99	1291.27
Ap2b1	1924.28	-0.265753	0.831765	0.0806682	-3.2944	0.000986336	0.0115624	2078.48	2074.17	2317.59	1936.3	1661.63	1667.08	1938.35	1720.66
Ap2m1	1629.25	-0.356051	0.7813	0.0680516	-5.23207	1.67618e-07	1.11681e-05	1842.06	1829.35	1831.91	1814.94	1481.87	1328.94	1530.92	1374.04
Ap2s1	287.497	-0.0295158	0.979749	0.123705	-0.238598	0.811418	0.910778	269.619	331.285	273.389	287.434	315.665	245.642	306.89	270.049
Ap3b1	878.607	-0.079977	0.946073	0.0741058	-1.07923	0.280486	0.530447	921.532	840.356	927.866	922.526	872.464	820.179	882.75	841.187
Ap3b2	539.042	-0.452982	0.730531	0.154834	-2.9256	0.00343789	0.028436	609.66	515.871	850.199	517.381	414.311	501.563	507.074	396.279
Ap3d1	1947.3	-0.235663	0.849294	0.0704529	-3.34498	0.000822891	0.0101548	2102.62	2014.91	2307.24	1999.26	1890.7	1770.89	1745.22	1747.56
Ap3m1	580.836	-0.213302	0.862561	0.0998229	-2.1368	0.0326139	0.139501	589.539	681.028	561.276	663.379	481.17	564.258	579.387	526.647
Ap3m1-ps	1.82146	-1.43568	0.369673	1.24014	-1.15768	0.246996	NA	3.01812	3.88604	1.03557	2.73747	1.09606	0	1.76374	1.03467
Ap3m2	199.113	-0.329185	0.795986	0.128894	-2.55391	0.010652	0.0642178	223.341	212.761	223.682	228.122	162.217	176.78	204.593	161.409
Ap3s1	390.511	-0.206081	0.866889	0.11065	-1.86245	0.0625397	0.213753	484.911	419.692	386.266	383.245	373.757	351.505	391.549	333.164
Ap3s1-ps1	13.6213	-0.0421956	0.971176	0.473184	-0.0891736	0.928944	0.968082	10.0604	12.6296	22.7824	10.0374	15.3448	9.25013	18.5192	10.3467
Ap3s1-ps2	10.668	0.702406	1.62722	0.514665	1.36478	0.172321	0.396076	13.0785	5.82906	6.21339	7.29991	18.633	13.3613	10.5824	10.3467
Ap3s2	575.264	-0.109915	0.926643	0.086845	-1.26564	0.205642	0.440303	613.684	596.507	581.988	595.855	540.358	613.592	515.893	544.237
Ap4b1	9.02334	-0.301924	0.81117	0.64037	-0.471484	0.637295	NA	18.1087	2.91453	4.14226	14.5998	7.67242	7.19455	6.17308	11.3814
Ap4e1	320.715	-0.157882	0.89634	0.108069	-1.46093	0.144035	0.355491	322.939	343.914	354.163	333.058	276.207	321.699	333.346	280.396
Ap4m1	505.399	-0.36643	0.775699	0.102142	-3.58745	0.000333924	0.00516418	590.545	535.302	528.138	622.317	409.927	501.563	413.596	441.804
Ap4s1	87.9338	-0.0239918	0.983508	0.236836	-0.101301	0.919311	0.964609	130.785	80.6353	67.3117	75.7365	93.1651	74.0011	73.195	108.64
Ap5b1	40.6755	-0.0031216	0.997839	0.295311	-0.0105706	0.991566	0.995997	38.2295	24.2877	55.9205	44.7119	42.7463	34.945	49.3846	35.1788
Ap5m1	268.192	0.0458156	1.03227	0.114667	0.399554	0.689485	0.845621	287.727	239.963	277.531	250.934	288.264	249.754	281.316	270.049
Ap5s1	49.6251	0.503125	1.41728	0.272879	1.84376	0.0652175	0.219742	38.2295	58.2906	40.387	27.3747	54.803	51.3896	52.0302	74.4963
Ap5z1	165.823	-0.175631	0.88538	0.13801	-1.2726	0.20316	0.436709	191.147	175.843	181.224	156.036	153.448	164.447	165.791	138.646
Apaf1	536.357	-0.00927636	0.993591	0.090033	-0.103033	0.917937	0.963911	502.014	598.45	508.462	542.931	550.222	522.119	537.939	528.717
Apba1	438.805	-0.0995049	0.933353	0.118262	-0.841396	0.400126	0.641647	422.536	447.866	543.672	401.495	465.826	448.118	383.613	397.314
Apba2	1340	-0.14169	0.906457	0.0803047	-1.7644	0.0776648	0.244664	1281.69	1391.2	1578.2	1373.29	1247.32	1248.77	1352.79	1246.78
Apba3	122.969	0.0304284	1.02132	0.188329	0.161571	0.871644	0.943255	151.912	114.638	111.841	108.586	93.1651	128.474	119.934	155.201
Apbb1	875.927	0.0117727	1.00819	0.101137	0.116403	0.907333	0.958749	820.928	786.923	1065.6	816.677	887.809	861.29	872.167	896.025
Apbb1ip	14.53	0.367203	1.28985	0.452822	0.810921	0.417411	0.655026	6.03624	14.5726	16.569	13.6873	17.537	11.3057	22.0467	14.4854
Apbb2	687.347	0.208861	1.15577	0.0938065	2.22651	0.0259804	0.118969	635.817	617.88	662.762	635.092	623.658	804.762	746.942	771.864
Apbb3	180.537	-0.0918169	0.93834	0.126918	-0.723434	0.469414	0.697172	184.105	199.159	181.224	180.673	184.138	174.725	179.901	160.374
Apc	4736.49	-0.10572	0.929341	0.0996231	-1.0612	0.2886	0.53923	4699.21	4411.62	6101.55	4428.31	4604.55	4793.63	4500.17	4352.86
Apc2	3826.98	-0.271583	0.82841	0.109284	-2.48511	0.012951	0.0733341	3878.28	3991.93	5345.59	3529.5	3549.04	3575.69	3417.24	3328.54
Apcdd1	1169.15	-0.257177	0.836723	0.149227	-1.7234	0.0848169	0.258505	1166	1127.92	1563.7	1236.42	987.55	819.151	1431.27	1021.22
Apc-ps1	12.7167	-0.2848	0.820855	0.47551	-0.598936	0.549215	0.754287	10.0604	20.4017	12.4268	12.7748	12.0567	14.3891	6.17308	13.4507
Apeh	360.032	0.0807221	1.05755	0.100251	0.805202	0.420703	0.657743	353.12	364.316	335.523	347.658	349.643	345.338	403.896	380.759
Apex1	624.073	0.53306	1.447	0.0973232	5.47722	4.32072e-08	3.53565e-06	516.098	480.897	499.142	542.931	726.688	798.595	636.709	791.523
Apex2	630.568	0.325889	1.25344	0.0878636	3.70904	0.000208047	0.00358227	595.575	545.988	539.529	556.618	739.841	753.372	647.291	666.328
Aph1a	160.719	0.0986595	1.07078	0.141006	0.699683	0.484125	0.708227	158.954	170.986	143.944	146.911	173.178	143.891	165.791	182.102
Aph1b	198.64	-0.331934	0.794471	0.142089	-2.3361	0.0194859	0.0973546	238.431	214.704	244.393	187.973	200.579	186.03	164.909	152.097
Aph1c	13.9391	0.0404219	1.02841	0.503353	0.0803054	0.935994	0.971137	10.0604	13.6011	17.6046	13.6873	8.76848	28.7782	9.70055	9.31204
Api5	928.298	-0.1023	0.931547	0.082887	-1.23421	0.217126	0.454275	977.87	1034.66	838.808	992.787	903.154	909.597	900.387	869.123
Apip	70.6794	-0.176485	0.884856	0.253605	-0.695905	0.486489	0.710062	64.3865	62.1766	89.0586	84.8614	43.8424	87.3624	82.0137	51.7335
Aplf	180.159	0.0271155	1.01897	0.128209	0.211494	0.832502	0.923195	177.063	174.872	189.508	172.46	190.714	163.419	180.783	192.449
Apln	72.448	0.3559	1.27978	0.214796	1.65692	0.0975347	0.282402	67.4046	71.8917	46.6004	68.4366	81.1085	77.0845	98.7692	68.2883
Aplnr	190.164	0.404237	1.32339	0.174774	2.31291	0.0207275	0.101306	124.749	173.9	166.726	189.798	207.155	175.753	280.434	202.795
Aplp1	964.398	-0.377456	0.769794	0.149159	-2.53056	0.011388	0.0674684	911.472	932.649	1537.81	978.188	893.289	826.345	903.915	731.512
Aplp2	1643.73	-0.00492211	0.996594	0.0690136	-0.0713209	0.943142	0.974394	1724.35	1604.93	1534.71	1721.87	1659.44	1548.88	1682.6	1673.06
Apmap	178.714	0.116898	1.0844	0.179193	0.652357	0.514171	0.730684	149.9	178.758	133.588	222.647	191.811	168.558	157.854	226.593
Apoa1	2.92086	1.51247	2.85298	1.10599	1.36753	0.171459	NA	2.01208	0	4.14226	0	2.19212	6.16676	2.6456	6.20802
Apoa2	2.16146	0.643274	1.56187	1.4068	0.457261	0.647483	NA	3.01812	0	0	3.64995	7.67242	0	0.881868	2.06934
Apobec1	23.9375	-0.495272	0.709428	0.358528	-1.3814	0.167155	0.389405	27.1631	33.0313	32.1025	20.0747	13.1527	15.4169	24.6923	25.8668
Apobec2	1.42867	-3.09986	0.11664	1.69336	-1.8306	0.0671607	NA	2.01208	2.91453	0	5.47493	0	1.02779	0	0
Apobec3	52.497	-0.0184735	0.987277	0.279957	-0.0659869	0.947388	0.976527	41.2476	63.1481	44.5293	62.0492	72.34	54.473	51.1483	31.0401
Apobr	5.18844	2.62273	6.15915	0.894616	2.93168	0.00337129	NA	0	2.91453	0	2.73747	10.9606	8.22234	5.29121	11.3814
Apoc1	1.41871	1.42969	2.6939	1.89175	0.755753	0.449797	NA	0	0	3.1067	0	0	5.13896	0	3.10401
Apod	96.957	0.455093	1.37087	0.201093	2.2631	0.0236294	0.111046	57.3442	99.094	95.272	75.7365	116.182	105.863	127.871	98.2937
Apoe	595.362	0.532966	1.4469	0.121415	4.38962	1.1355e-05	0.000368806	438.633	545.017	510.534	453.507	695.998	630.037	864.231	624.941
Apol7d	12.0103	0.72169	1.64911	0.51349	1.40546	0.159884	0.378907	15.0906	6.80057	5.17783	9.12488	12.0567	22.6114	9.70055	15.5201
Apol8	1.32323	-0.156521	0.897186	1.7361	-0.0901563	0.928163	NA	0	0.971509	0	4.56244	3.28818	0	1.76374	0
Apold1	28.0979	0.0728202	1.05177	0.364254	0.199916	0.841546	0.927914	38.2295	34.0028	17.6046	20.0747	18.633	29.806	40.5659	25.8668
Apom	5.80989	0.216961	1.16228	0.691244	0.31387	0.75362	NA	3.01812	4.85755	7.24896	6.38742	4.38424	11.3057	6.17308	3.10401
Apon	8.54047	-0.054678	0.962809	0.648622	-0.0842987	0.932819	NA	11.0664	10.6866	1.03557	11.8623	6.57636	11.3057	4.40934	11.3814
Apoo	130.595	-0.0581758	0.960478	0.15284	-0.380633	0.703476	0.853068	120.725	124.353	137.73	149.648	142.488	116.141	124.343	129.334
Apool	105.214	-0.122249	0.918754	0.189644	-0.644621	0.519173	0.733157	128.773	111.724	77.6674	120.448	93.1651	113.057	105.824	91.051
Apoo-ps	4.50056	-0.399027	0.758369	0.937205	-0.425763	0.67028	NA	2.01208	14.5726	1.03557	2.73747	5.4803	4.11117	0.881868	5.17335
Apopt1	198.888	0.0742697	1.05283	0.134058	0.554014	0.579569	0.775566	204.226	164.185	194.686	211.697	207.155	227.142	195.775	186.241
App	3397.08	-0.1597	0.895212	0.0797243	-2.00315	0.0451615	0.172858	3456.75	3459.54	4042.85	3382.59	3167.61	2976.49	3519.53	3171.27
Appbp2	1209.24	0.0288573	1.0202	0.0672736	0.428954	0.667956	0.831928	1187.13	1233.82	1151.55	1216.35	1156.34	1214.85	1244.32	1269.54
Appbp2os	16.7425	-0.0581517	0.960494	0.518188	-0.112221	0.910648	0.960301	24.1449	5.82906	7.24896	31.0246	13.1527	18.5003	18.5192	15.5201
Appl1	947.504	-0.0520251	0.964581	0.072912	-0.713533	0.475516	0.701599	1028.17	920.991	926.831	981.837	930.555	963.042	905.678	922.926
Appl2	443.329	-0.102869	0.931179	0.0951465	-1.08116	0.279625	0.529443	482.899	468.267	430.795	455.332	419.791	392.617	466.508	430.423
Aprt	226.849	0.38874	1.30925	0.131161	2.96384	0.00303824	0.0258926	175.051	215.675	173.975	220.822	234.557	249.754	264.56	280.396
Aptx	414.769	-0.199732	0.870712	0.101507	-1.96766	0.049107	0.18232	440.645	452.723	479.467	400.582	416.503	403.923	358.038	366.273
Aqp1	44.0903	0.794526	1.73451	0.312498	2.5425	0.0110062	0.0657447	27.1631	19.4302	50.7427	31.9371	66.8597	44.1951	67.9038	44.4908
Aqp11	31.642	0.171919	1.12656	0.308847	0.556649	0.577767	0.774322	24.1449	30.1168	32.1025	32.8496	36.17	21.5836	44.0934	32.0748
Aqp4	12.9245	-0.949604	0.517774	0.521023	-1.82258	0.0683673	0.226233	6.03624	16.5157	21.7469	23.7247	7.67242	7.19455	7.05494	13.4507
Aqp9	3.50441	-0.77035	0.586275	1.03992	-0.740781	0.458826	NA	2.01208	9.71509	3.1067	2.73747	7.67242	1.02779	1.76374	0
Aqr	1115.81	-0.164196	0.892426	0.0805766	-2.03776	0.0415737	0.163587	1147.89	1261.99	1159.83	1146.09	1027.01	1096.65	948.89	1138.14
Ar	2.44934	3.16625	8.97713	1.47186	2.15119	0.0314611	NA	1.00604	0.971509	0	0	6.57636	0	7.93681	3.10401
Araf	612.878	-0.273367	0.827386	0.0893425	-3.05976	0.00221513	0.0206987	724.348	645.082	625.481	688.929	516.244	582.758	587.324	532.855
Arap1	153.128	0.404916	1.32401	0.161195	2.51197	0.0120061	0.0696062	113.682	145.726	133.588	134.136	201.675	165.475	193.129	137.611
Arap2	73.9645	0.161142	1.11817	0.190011	0.848068	0.3964	0.638399	68.4107	63.1481	76.6318	71.1741	85.4927	69.8899	79.3681	77.6003
Arap3	234.631	0.298939	1.23024	0.157677	1.8959	0.0579735	0.203173	207.244	199.159	184.331	250.934	272.919	193.225	309.536	259.702
Arc	38.8327	0.096033	1.06883	0.294033	0.326607	0.743965	0.876749	35.2114	29.1453	48.6716	37.412	48.2266	29.806	51.1483	31.0401
Arcn1	1394.15	-0.102242	0.931584	0.0759639	-1.34593	0.178324	0.404252	1506.04	1466.98	1356.59	1445.38	1235.26	1289.88	1406.58	1446.47
Arel1	550.495	-0.292925	0.816245	0.115994	-2.52535	0.0115583	0.0681489	531.189	576.105	696.935	621.405	518.436	479.979	560.868	419.042
Arf1	1815.89	0.0708616	1.05034	0.0632282	1.12073	0.262404	0.509895	1694.17	1845.87	1751.14	1793.04	1940.03	1890.11	1835.17	1777.56
Arf2	460.133	0.0679241	1.04821	0.0942811	0.720442	0.471253	0.698605	446.681	413.863	439.08	497.306	452.673	495.396	473.563	462.498
Arf3	1206.86	-0.107093	0.928457	0.0826828	-1.29523	0.195241	0.426043	1173.04	1315.42	1389.73	1129.66	1141	1151.13	1206.4	1148.48
Arf4	1342.16	-0.117087	0.922047	0.0673064	-1.73962	0.081926	0.253585	1307.85	1383.43	1458.08	1437.17	1314.18	1269.32	1318.39	1248.85
Arf4os	2.48926	-0.0627252	0.957454	1.27228	-0.0493012	0.960679	NA	1.00604	0	0	9.12488	1.09606	2.05559	3.52747	3.10401
Arf5	602.253	-0.14696	0.903151	0.100594	-1.46093	0.144035	0.355491	590.545	611.079	615.126	715.391	506.38	550.897	624.362	604.248
Arf6	659.931	0.688429	1.61153	0.0935263	7.36081	1.82802e-13	4.74077e-11	446.681	564.447	491.893	517.381	847.255	826.345	750.47	834.979
Arfgap1	520.354	-0.0885828	0.940446	0.0872395	-1.0154	0.309916	0.560062	506.038	560.561	533.316	545.668	498.707	468.673	527.357	522.509
Arfgap2	592.276	-0.0846623	0.943005	0.0845962	-1.00078	0.316933	0.566486	588.533	615.937	598.557	636.004	521.725	598.175	592.615	586.658
Arfgap3	199.746	0.0466519	1.03287	0.156386	0.298313	0.765464	0.887583	145.876	186.53	222.646	230.86	202.771	220.975	207.239	181.067
Arfgef1	1308.05	-0.00573266	0.996034	0.0711091	-0.0806178	0.935746	0.971058	1275.66	1359.14	1235.43	1370.56	1355.83	1354.63	1236.38	1276.78
Arfgef2	368.551	0.312759	1.24208	0.103144	3.03226	0.00242727	0.0222252	346.078	362.373	295.136	311.159	429.656	394.672	404.777	404.556
Arfgef3	260.553	-0.15246	0.899715	0.183025	-0.833001	0.404844	0.644896	273.643	230.248	386.266	208.047	254.286	200.42	288.371	243.148
[truncated: 21,147 more rows]

## Sheet: RNA-seq DEGs
Row.names	baseMean	log2FoldChange	FoldChange	lfcSE	stat	pvalue	padj	WT-Input1	WT-Input2	WT-Input4	WT-Input5	KO-Input1	KO-Input3	KO-Input4	KO-Input5	Change
1110012L19Rik	68.1802	0.684768	1.60744	0.235825	2.90372	0.00368762	0.0299001	59.3563	45.6609	61.0983	42.887	108.51	80.1678	60.8489	86.9123	UP
1300002E11Rik	104.065	-0.661277	0.632318	0.215714	-3.06553	0.00217285	0.0204632	145.876	85.4928	139.801	138.698	66.8597	86.3346	67.022	102.432	DOWN
1500004A13Rik	554.156	-0.742391	0.597748	0.0916015	-8.10457	5.29308e-16	2.28783e-13	684.107	680.057	755.963	655.167	398.966	454.284	413.596	391.106	DOWN
1700008J07Rik	57.5591	-0.639913	0.641752	0.248741	-2.57261	0.0100936	0.06176	66.3986	53.433	75.5963	84.8614	50.4188	30.8338	44.0934	54.8376	DOWN
1700017B05Rik	232.129	0.732518	1.66154	0.142787	5.13013	2.89538e-07	1.77481e-05	161.972	194.302	146.015	194.36	316.761	326.838	253.978	262.806	UP
1810024B03Rik	34.501	-0.882278	0.54251	0.308585	-2.8591	0.0042484	0.0332476	61.3684	37.8889	39.3515	40.1495	24.1133	32.8894	18.5192	21.7281	DOWN
2600014E21Rik	82.212	-1.25353	0.41942	0.27308	-4.59035	4.42509e-06	0.000168004	96.5798	80.6353	185.366	101.286	44.9385	54.473	58.2033	36.2135	DOWN
2610318N02Rik	266.004	0.597019	1.51259	0.198864	3.00216	0.00268075	0.0237442	226.359	241.906	122.197	255.497	328.818	366.922	240.75	345.58	UP
2810013P06Rik	75.1823	-0.864497	0.549238	0.216074	-4.00093	6.30938e-05	0.00145895	108.652	84.5213	91.1297	104.024	60.2833	58.5842	59.0852	35.1788	DOWN
2810049E08Rik	38.6987	1.5129	2.85383	0.315059	4.80195	1.57129e-06	7.33719e-05	18.1087	23.3162	18.6402	20.0747	62.4754	82.2234	42.3297	42.4215	UP
2810403D21Rik	51.8029	0.635357	1.55332	0.251908	2.52218	0.0116628	0.0685258	41.2476	42.7464	32.1025	45.6244	72.34	68.8621	43.2115	68.2883	UP
2810459M11Rik	74.8274	-1.02305	0.492075	0.340892	-3.0011	0.00269002	0.0237799	89.5375	61.2051	171.904	79.3865	41.6503	34.945	83.7775	36.2135	DOWN
3110006O06Rik	21.5271	-1.34808	0.392813	0.561805	-2.39956	0.0164149	0.0866871	20.1208	19.4302	66.2762	18.2498	9.86454	3.08338	23.8104	11.3814	DOWN
3110039M20Rik	330.72	0.933143	1.90943	0.157457	5.92633	3.09776e-09	3.70347e-07	244.468	244.82	249.571	170.635	420.887	512.869	330.7	471.81	UP
3110040N11Rik	72.0072	-0.722475	0.606057	0.21222	-3.40436	0.000663186	0.00865274	82.4952	88.4073	78.7029	108.586	62.4754	61.6676	50.2665	43.4562	DOWN
3110080E11Rik	66.0384	-0.958997	0.514414	0.295285	-3.2477	0.0011634	0.0130523	77.465	79.6638	124.268	68.4366	24.1133	45.2229	68.7857	40.3522	DOWN
4632404H12Rik	194.1	-0.588449	0.665057	0.134141	-4.38679	1.15038e-05	0.000372206	200.202	232.191	242.322	257.322	168.793	141.835	150.799	159.339	DOWN
4732440D04Rik	129.845	0.866344	1.82304	0.187972	4.6089	4.04801e-06	0.000156868	95.5737	93.2649	103.557	75.7365	140.296	216.864	137.571	175.894	UP
4930513N10Rik	21.2909	-1.30694	0.404177	0.417618	-3.12951	0.00175095	0.0177272	22.1329	41.7749	21.7469	35.587	16.4409	13.3613	14.1099	5.17335	DOWN
4930522L14Rik	50.5416	0.805313	1.74752	0.291719	2.76057	0.00576997	0.0415305	26.157	28.1738	50.7427	41.9745	52.6109	78.1122	45.8571	80.7043	UP
4930539J05Rik	37.0274	-0.832908	0.561397	0.291285	-2.85943	0.00424405	0.0332348	62.3744	43.7179	40.387	42.887	31.7857	30.8338	19.4011	24.8321	DOWN
4932422M17Rik	36.0463	-0.776878	0.583628	0.275795	-2.81687	0.00484942	0.0366577	46.2778	50.5185	42.4582	42.887	23.0173	22.6114	26.456	34.1441	DOWN
5330416C01Rik	20.2099	-1.75378	0.296524	0.416499	-4.21076	2.54512e-05	0.000702177	31.1872	25.2592	46.6004	21.8997	8.76848	8.22234	11.4643	8.27737	DOWN
5730522E02Rik	141.153	-0.675091	0.626293	0.202765	-3.32942	0.000870271	0.0105998	135.815	139.897	249.571	169.723	103.03	99.6959	126.989	104.502	DOWN
6030443J06Rik	33.473	-1.05049	0.482804	0.318282	-3.3005	0.000965116	0.0114281	53.3201	45.6609	42.4582	39.237	27.4015	24.667	24.6923	10.3467	DOWN
6530402F18Rik	300.816	-0.670931	0.628101	0.177862	-3.7722	0.000161817	0.00296494	391.349	312.826	489.822	285.609	184.138	234.337	290.135	218.316	DOWN
9130023H24Rik	75.7937	-0.761998	0.589679	0.202622	-3.76068	0.000169454	0.00307149	90.5435	78.6923	108.734	103.111	61.3794	51.3896	49.3846	63.1149	DOWN
9130024F11Rik	53.9987	-1.48585	0.357038	0.385137	-3.85798	0.000114329	0.00233322	58.3503	44.6894	157.406	58.3993	16.4409	28.7782	37.9203	30.0055	DOWN
9330104G04Rik	33.5975	-1.09696	0.467502	0.337789	-3.24746	0.00116438	0.0130523	48.2899	54.4045	55.9205	24.6372	17.537	28.7782	18.5192	20.6934	DOWN
9330162G02Rik	146.687	-0.646965	0.638622	0.172845	-3.74303	0.000181817	0.00323641	162.978	158.356	234.038	160.598	129.335	104.835	102.297	121.056	DOWN
9630028B13Rik	110.174	-1.117	0.461053	0.260146	-4.29373	1.75698e-05	0.000520516	185.111	123.382	171.904	124.098	49.3227	46.2507	111.997	69.3229	DOWN
A030001D20Rik	33.5248	-1.09304	0.468773	0.375593	-2.91017	0.00361235	0.0294456	55.3322	38.8604	27.9603	60.2242	35.0739	17.4725	22.9286	10.3467	DOWN
A330008L17Rik	24.6479	-1.40245	0.378287	0.357443	-3.92356	8.72495e-05	0.00189288	38.2295	23.3162	41.4226	40.1495	15.3448	10.2779	14.9918	13.4507	DOWN
A330084C13Rik	101.208	-1.29406	0.407802	0.305381	-4.23753	2.25993e-05	0.000641339	131.791	98.1224	251.642	93.9863	66.8597	35.9727	72.3132	58.9762	DOWN
A430103D13Rik	24.8583	0.818973	1.76415	0.331298	2.47201	0.0134354	0.0752178	22.1329	13.6011	21.7469	14.5998	35.0739	29.806	30.8654	31.0401	UP
A730017L22Rik	121.917	-0.655095	0.635034	0.203208	-3.22377	0.00126517	0.0138938	182.093	152.527	165.69	96.7238	101.934	94.5569	103.179	78.635	DOWN
Abcc8	142.26	-1.6756	0.313036	0.543316	-3.08402	0.00204221	0.019638	184.105	101.037	435.973	145.998	56.9951	45.2229	112.879	55.8722	DOWN
AC102496.1	129.771	-1.32117	0.400211	0.174457	-7.57304	3.64595e-14	1.07824e-11	198.19	150.584	182.259	210.785	77.8203	71.9455	85.5412	61.0456	DOWN
AC107768.1	28.0292	0.787309	1.72585	0.307666	2.55897	0.0104982	0.0634293	20.1208	21.3732	19.6757	20.9872	41.6503	27.7504	34.3928	38.2828	UP
AC122898.1	74.7522	1.96894	3.9148	0.269594	7.30336	2.80673e-13	6.95781e-11	39.2355	35.9458	33.1381	13.6873	129.335	135.669	89.9505	121.056	UP
AC124108.1	162.683	0.611384	1.52772	0.153166	3.99164	6.56186e-05	0.0015029	148.894	99.094	143.944	123.186	211.54	195.281	192.247	187.275	UP
AC138768.2	27.3816	0.845661	1.79709	0.340436	2.48405	0.0129897	0.0734543	21.1268	15.5441	18.6402	22.8122	36.17	26.7226	27.3379	50.6989	UP
AC154542.1	40.341	-0.927348	0.525824	0.291473	-3.18159	0.0014647	0.0155383	40.2416	66.0626	65.2406	40.1495	30.6897	27.7504	30.8654	21.7281	DOWN
AC158975.2	76.3597	-0.799299	0.574628	0.240679	-3.32102	0.000896884	0.0108223	93.5617	93.2649	83.8808	117.711	36.17	44.1951	69.6676	72.427	DOWN
Acer3	80.9649	0.735041	1.66444	0.231165	3.17973	0.00147415	0.0156287	67.4046	47.604	51.7783	75.7365	99.7415	103.807	72.3132	129.334	UP
Acot2	50.2424	0.685954	1.60876	0.263396	2.60427	0.00920706	0.0579045	27.1631	39.8319	32.1025	54.7493	55.8991	66.8065	70.5494	54.8376	UP
Acrbp	97.7872	-0.632163	0.645209	0.172678	-3.66093	0.000251299	0.00412717	135.815	121.439	101.485	116.799	73.436	77.0845	77.6044	78.635	DOWN
Acsbg1	84.5875	-0.650003	0.637279	0.252738	-2.57184	0.0101159	0.0618455	96.5798	120.467	102.521	93.0738	63.5715	72.9733	34.3928	93.1204	DOWN
Acvr1c	33.5437	-1.62187	0.324914	0.397009	-4.08523	4.40334e-05	0.00110622	61.3684	23.3162	67.3117	51.0993	13.1527	10.2779	27.3379	14.4854	DOWN
Adam1a	72.5756	-0.636229	0.643393	0.210005	-3.02959	0.00244882	0.0223376	92.5556	68.9772	97.3431	94.8988	54.803	56.5286	67.9038	47.5949	DOWN
Adamts12	267.137	0.639089	1.55735	0.165952	3.85104	0.000117615	0.00237274	179.075	224.419	209.184	223.56	314.569	238.448	431.233	316.609	UP
Adamts17	158.704	-1.1548	0.449129	0.208698	-5.53335	3.14178e-08	2.68837e-06	188.129	184.587	321.025	183.41	82.2045	91.4736	122.58	96.2244	DOWN
Adamts18	340.297	-1.0793	0.473257	0.197574	-5.46277	4.68769e-08	3.76288e-06	398.392	350.715	686.58	413.357	190.714	223.031	279.552	180.033	DOWN
Adamts3	451.249	-0.769204	0.586741	0.28151	-2.73242	0.00628703	0.0441217	483.905	416.778	904.048	470.844	298.128	356.644	388.904	290.742	DOWN
Adamtsl3	55.5311	-1.25973	0.417621	0.245192	-5.13775	2.78051e-07	1.7232e-05	64.3865	93.2649	75.5963	80.299	35.0739	34.945	37.9203	22.7628	DOWN
Adcy4	52.2169	0.731601	1.66048	0.244798	2.98858	0.00280273	0.0244542	43.2597	41.7749	37.2803	34.6746	81.1085	47.2785	66.1401	66.2189	UP
Adcyap1	26.7543	-0.913105	0.531041	0.37288	-2.44879	0.0143338	0.0789364	48.2899	31.0883	18.6402	41.9745	17.537	16.4447	25.5742	14.4854	DOWN
Adgre1	21.1618	1.05474	2.07735	0.385745	2.7343	0.00625132	0.0439464	8.04831	17.4872	18.6402	10.9499	20.8251	31.8616	27.3379	34.1441	UP
Adgrg6	26.2852	1.74695	3.35648	0.382871	4.56276	5.04848e-06	0.000187038	10.0604	15.5441	14.4979	8.2124	59.1872	25.6948	38.8022	38.2828	UP
Adhfe1	72.1005	3.2363	9.42375	0.323488	10.0044	1.4578e-23	2.70219e-20	11.0664	9.71509	9.32009	24.6372	157.833	163.419	89.0687	111.744	UP
Adora2a	46.9133	0.664476	1.58499	0.282418	2.35281	0.0186323	0.0948038	32.1933	51.49	36.2448	25.5497	43.8424	71.9455	64.3764	49.6642	UP
Aebp1	243.826	0.716716	1.64344	0.187196	3.82869	0.000128826	0.00251927	181.087	224.419	199.864	133.223	346.355	222.003	375.676	267.98	UP
Aen	623.399	1.02802	2.03922	0.114614	8.96942	2.98073e-19	2.39268e-16	400.404	398.319	371.768	469.019	851.639	974.347	706.376	815.321	UP
AI849053	33.943	-0.897677	0.53675	0.335639	-2.67453	0.0074834	0.0499441	34.2053	39.8319	42.4582	60.2242	12.0567	25.6948	22.9286	34.1441	DOWN
Aifm2	34.7767	0.924319	1.89779	0.327565	2.82179	0.0047757	0.0362467	18.1087	14.5726	24.8536	38.3245	46.0345	37.0005	53.7939	45.5255	UP
Ak7	49.732	0.93103	1.90664	0.374017	2.48927	0.0128006	0.072751	47.2838	8.74358	36.2448	44.7119	72.34	48.3063	86.4231	53.8029	UP
Alk	57.6845	-0.832751	0.561458	0.263225	-3.16365	0.00155804	0.0162705	89.5375	54.4045	91.1297	61.1367	37.266	43.1673	53.7939	31.0401	DOWN
Alpk1	129.405	-0.690694	0.619556	0.202682	-3.40777	0.000654969	0.00857872	173.039	164.185	175.011	127.748	113.99	69.8899	129.635	81.739	DOWN
Alx4	99.2372	0.654105	1.57364	0.216527	3.02089	0.0025203	0.0227901	80.4831	82.5783	63.1695	82.124	146.872	76.0567	138.453	124.16	UP
Alyref2	66.1479	0.613242	1.52969	0.208448	2.94194	0.00326166	0.0272862	45.2718	47.604	54.885	61.1367	75.6282	89.418	71.4313	83.8083	UP
Ankrd39	74.5133	0.625588	1.54284	0.206408	3.03083	0.00243881	0.0222824	60.3624	43.7179	57.9916	72.0866	98.6454	93.5291	89.0687	80.7043	UP
Ankrd40	732.802	0.602551	1.5184	0.082466	7.30667	2.73849e-13	6.88996e-11	529.177	606.222	616.161	576.693	848.351	858.207	899.505	928.1	UP
Ankrd9	64.0551	0.664873	1.58543	0.22682	2.93128	0.00337563	0.0280063	57.3442	60.2336	34.1736	46.5369	69.0518	76.0567	87.3049	81.739	UP
Ano3	37.3436	2.07317	4.20811	0.347876	5.95951	2.52995e-09	3.11295e-07	8.04831	22.3447	9.32009	17.3373	66.8597	42.1395	58.2033	74.4963	UP
Antxr2	214.193	0.732081	1.66103	0.15728	4.65465	3.24536e-06	0.000135079	153.924	168.071	141.872	178.848	305.801	281.615	195.775	287.638	UP
Aoc2	73.9015	-0.773961	0.58481	0.244705	-3.16283	0.00156244	0.0162983	93.5617	92.2934	83.8808	104.024	29.5936	50.3618	72.3132	65.1843	DOWN
Aqp1	44.0903	0.794526	1.73451	0.312498	2.5425	0.0110062	0.0657447	27.1631	19.4302	50.7427	31.9371	66.8597	44.1951	67.9038	44.4908	UP
Arf6	659.931	0.688429	1.61153	0.0935263	7.36081	1.82802e-13	4.74077e-11	446.681	564.447	491.893	517.381	847.255	826.345	750.47	834.979	UP
Arhgap30	23.025	0.981739	1.97484	0.390623	2.51326	0.0119621	0.0695344	10.0604	10.6866	25.8891	15.5123	32.8818	26.7226	39.6841	22.7628	UP
Arhgap45	32.4627	1.28234	2.43234	0.322396	3.97754	6.96324e-05	0.00157134	17.1027	14.5726	15.5335	28.2871	36.17	55.5008	51.1483	41.3868	UP
Arhgef3	21.9204	0.927665	1.9022	0.396178	2.34153	0.0192046	0.0963777	16.0966	12.6296	22.7824	9.12488	21.9212	25.6948	24.6923	42.4215	UP
Arl4a	313.745	0.890918	1.85436	0.129824	6.86249	6.76716e-12	1.42592e-09	181.087	229.276	242.322	227.21	406.638	367.95	478.854	376.62	UP
Arxes1	45.2446	0.93947	1.91782	0.289942	3.2402	0.00119445	0.0132996	42.2536	25.2592	20.7113	35.587	78.9163	55.5008	58.2033	45.5255	UP
Arxes2	75.2445	0.924203	1.89764	0.219767	4.20539	2.60638e-05	0.000715566	57.3442	50.5185	56.9561	42.887	94.2612	101.751	74.0769	124.16	UP
Asb4	51.9781	0.913573	1.8837	0.250459	3.64759	0.000264711	0.00430302	39.2355	37.8889	32.1025	34.6746	92.0691	65.7787	58.2033	55.8722	UP
Asic1	251.366	-0.760105	0.590453	0.172011	-4.41893	9.91926e-06	0.000332423	314.89	268.137	428.724	253.672	155.641	207.614	206.357	175.894	DOWN
Atg16l2	89.3868	0.817667	1.76255	0.229342	3.56527	0.000363476	0.00552989	84.5073	44.6894	71.454	58.3993	97.5494	151.086	98.7692	108.64	UP
Atoh8	58.6282	0.620922	1.53786	0.259067	2.39676	0.0165407	0.0871877	51.308	25.2592	57.9916	50.1869	75.6282	68.8621	59.0852	80.7043	UP
Atp10d	42.2881	0.700457	1.62502	0.262972	2.66362	0.00773056	0.0511437	33.1993	31.0883	39.3515	25.5497	47.1306	44.1951	54.6758	63.1149	UP
Atp2b2	774.224	-0.736604	0.60015	0.124346	-5.92383	3.14531e-09	3.71069e-07	935.617	858.814	1186.76	891.501	546.934	530.341	703.731	540.098	DOWN
Aunip	87.1595	1.27726	2.42379	0.226652	5.63534	1.74714e-08	1.61822e-06	48.2899	57.3191	35.2092	62.0492	146.872	138.752	90.8324	117.952	UP
AW011738	71.8947	-0.734509	0.601023	0.225686	-3.25455	0.00113571	0.0128211	84.5073	115.61	82.8452	75.7365	59.1872	54.473	39.6841	63.1149	DOWN
AW209491	198.365	0.816977	1.76171	0.134096	6.09248	1.11173e-09	1.49923e-07	149.9	133.097	143.944	147.823	217.02	287.782	248.687	258.668	UP
AW551984	33.1465	1.46259	2.75603	0.347249	4.21194	2.53187e-05	0.000699667	14.0845	27.2023	14.4979	14.5998	71.2439	38.0283	37.9203	47.5949	UP
Azin2	67.9889	0.690449	1.61379	0.235334	2.93392	0.00334713	0.0278189	58.3503	39.8319	47.636	62.0492	98.6454	58.5842	84.6593	94.155	UP
B230206I08Rik	37.121	-1.13698	0.454711	0.327894	-3.46751	0.000525294	0.00728496	41.2476	43.7179	81.8096	37.412	27.4015	18.5003	22.0467	24.8321	DOWN
B230208H11Rik	102.761	0.775725	1.71205	0.253743	3.05713	0.00223471	0.0208354	68.4107	46.6324	127.375	61.1367	127.143	144.919	118.17	128.299	UP
Babam2	93.273	-0.732741	0.60176	0.186892	-3.92066	8.83074e-05	0.00190331	103.622	139.897	113.912	108.586	76.7242	58.5842	77.6044	67.2536	DOWN
Bag2	189.047	0.882696	1.84382	0.157219	5.61444	1.97201e-08	1.78722e-06	101.61	141.84	124.268	163.335	223.596	264.143	226.64	266.945	UP
Bag5	510.63	0.612726	1.52915	0.113195	5.41302	6.19712e-08	4.77008e-06	359.156	408.034	426.653	420.657	575.432	717.399	530.003	647.704	UP
Bbc3	81.6337	1.08462	2.12081	0.191929	5.65114	1.59389e-08	1.51423e-06	44.2657	64.1196	48.6716	52.0118	111.798	118.196	108.47	105.536	UP
BC024139	30.1316	-0.855148	0.552808	0.360538	-2.37187	0.0176985	0.0913764	29.1751	43.7179	44.5293	37.412	27.4015	13.3613	12.3462	33.1095	DOWN
BC025920	49.9462	-0.654461	0.635313	0.277912	-2.35493	0.0185263	0.0943784	74.4469	61.2051	51.7783	57.4868	20.8251	37.0005	50.2665	46.5602	DOWN
BC030499	38.1042	1.09675	2.13873	0.293682	3.7345	0.000188092	0.00331604	37.2235	19.4302	18.6402	21.8997	58.0912	47.2785	54.6758	47.5949	UP
BC034090	197.343	0.923125	1.89622	0.168802	5.46868	4.53396e-08	3.67447e-06	172.033	108.809	155.335	109.499	233.461	293.949	234.577	271.084	UP
BC051226	25.7384	-0.949875	0.517677	0.389098	-2.44122	0.0146377	0.0800092	47.2838	28.1738	42.4582	18.2498	12.0567	17.4725	24.6923	15.5201	DOWN
BC067074	141.79	0.716454	1.64314	0.159598	4.48911	7.15224e-06	0.000251359	106.64	110.752	94.2364	117.711	149.064	160.336	201.066	194.518	UP
Bcan	169.985	-1.26805	0.415219	0.515935	-2.45778	0.0139798	0.0774171	224.347	134.068	397.657	205.31	77.8203	66.8065	194.893	58.9762	DOWN
Bche	31.4743	1.05806	2.08214	0.358468	2.95163	0.00316105	0.0266163	16.0966	30.1168	15.5335	20.0747	38.3621	25.6948	63.4945	42.4215	UP
Bcl6	58.6431	-1.05395	0.481649	0.278052	-3.79047	0.000150365	0.00281008	59.3563	62.1766	123.232	72.0866	33.9779	46.2507	37.9203	34.1441	DOWN
Bend6	89.6399	-1.02369	0.491858	0.268707	-3.80967	0.000139152	0.0026535	112.676	81.6068	195.722	91.2488	47.1306	56.5286	67.022	65.1843	DOWN
Bend7	49.6842	1.05837	2.08258	0.253372	4.17715	2.95186e-05	0.000797428	34.2053	29.1453	27.9603	37.412	64.6675	87.3624	60.8489	55.8722	UP
Bicc1	207.423	0.608484	1.52466	0.164686	3.69481	0.000220053	0.00373372	140.845	211.789	146.015	158.773	269.631	222.003	297.189	213.142	UP
Bmp3	75.3218	-1.42641	0.372056	0.316379	-4.50853	6.52779e-06	0.000233628	109.658	106.866	148.086	75.7365	20.8251	34.945	72.3132	34.1441	DOWN
Bmp7	252.948	0.639748	1.55806	0.151607	4.21978	2.44545e-05	0.000680248	183.099	175.843	216.433	216.26	305.801	236.392	378.321	311.436	UP
Bmper	146.084	-0.844601	0.556865	0.149471	-5.65059	1.59894e-08	1.51423e-06	168.009	193.33	210.22	179.76	97.5494	109.974	114.643	95.1897	DOWN
Bmyc	86.5777	0.698873	1.62324	0.198269	3.52487	0.000423692	0.00619613	64.3865	50.5185	70.4184	78.474	95.3572	117.168	95.2417	121.056	UP
Brf2	147.523	0.757968	1.69111	0.167596	4.52259	6.10872e-06	0.000221222	80.4831	134.068	114.948	108.586	203.867	183.975	164.909	189.345	UP
Brinp1	82.9078	-1.1053	0.464806	0.251877	-4.38826	1.14259e-05	0.000370398	89.5375	100.065	170.868	92.1613	67.9557	43.1673	46.739	52.7682	DOWN
BX649560.1	111.758	0.897491	1.86282	0.183726	4.88495	1.03454e-06	5.23698e-05	80.4831	85.4928	79.7385	66.6117	124.951	175.753	121.698	159.339	UP
C130026L21Rik	74.7973	0.609013	1.52522	0.226535	2.68839	0.00717977	0.0486257	59.3563	66.0626	44.5293	66.6117	87.6848	71.9455	81.1318	121.056	UP
C1qb	34.379	1.13199	2.1916	0.313984	3.60523	0.000311874	0.00491793	17.1027	13.6011	31.067	24.6372	40.5542	45.2229	57.3214	45.5255	UP
C1qc	48.5628	0.951601	1.93402	0.264227	3.60145	0.000316448	0.0049622	37.2235	26.2308	46.6004	22.8122	67.9557	59.612	67.022	61.0456	UP
C1qtnf9	44.0648	3.40101	10.5635	0.359179	9.46884	2.82957e-21	3.17987e-18	6.03624	11.6581	8.28452	4.56244	99.7415	89.418	63.4945	69.3229	UP
C230057M02Rik	56.9191	0.648799	1.56786	0.258651	2.5084	0.012128	0.0701827	44.2657	48.5755	38.3159	46.5369	56.9951	75.0289	97.0055	48.6295	UP
Cabp1	409.734	-0.77404	0.584778	0.130143	-5.9476	2.72098e-09	3.32374e-07	507.044	487.698	596.486	479.056	261.958	313.477	370.385	261.772	DOWN
Cacna1e	1050.61	-0.914104	0.530673	0.304705	-2.99996	0.00270014	0.0238305	1213.28	1078.38	2217.14	982.75	665.309	685.538	936.544	625.976	DOWN
Cacna1g	1141.1	0.808624	1.75154	0.0786443	10.282	8.49126e-25	2.38562e-21	844.067	828.697	761.14	882.376	1504.89	1362.85	1396.88	1547.87	UP
Cacna2d2	499.779	0.640076	1.55841	0.111669	5.73191	9.93042e-09	1.00238e-06	397.386	388.604	442.186	334.883	592.969	669.093	532.648	640.461	UP
Cadm2	365.729	-0.778364	0.583028	0.139629	-5.5745	2.48248e-08	2.19095e-06	437.627	442.037	589.237	379.595	287.168	291.893	259.269	239.009	DOWN
Calcrl	93.2063	0.607487	1.5236	0.181349	3.34983	0.000808619	0.0100153	80.4831	77.7207	73.5251	63.8742	124.951	92.5013	114.643	117.952	UP
Caln1	27.9153	-1.09121	0.469367	0.417349	-2.61463	0.00893254	0.0566202	33.1993	41.7749	60.0628	17.3373	19.7291	10.2779	26.456	14.4854	DOWN
Camk4	52.3557	-1.01306	0.495493	0.317399	-3.19177	0.00141406	0.0151633	70.4227	40.8034	108.734	60.2242	47.1306	28.7782	37.9203	24.8321	DOWN
Car14	211.618	0.777064	1.71364	0.180112	4.31434	1.6008e-05	0.000482731	153.924	173.9	104.592	190.71	222.5	294.977	239.868	312.471	UP
Carmil3	1578.87	-0.626686	0.647662	0.111061	-5.64272	1.6738e-08	1.55885e-06	1843.06	1809.92	2270.99	1743.77	1112.5	1398.83	1374.83	1077.09	DOWN
Ccdc13	41.8223	0.821443	1.76717	0.27853	2.9492	0.00318594	0.0267857	41.2476	25.2592	26.9247	27.3747	58.0912	46.2507	43.2115	66.2189	UP
Ccdc30	87.73	0.632697	1.55046	0.183111	3.45527	0.00054975	0.00752202	76.459	70.9202	69.3829	58.3993	115.086	116.141	96.1236	99.3284	UP
Ccdc51	90.1129	0.599185	1.51486	0.200338	2.99088	0.00278177	0.0243343	75.4529	49.547	76.6318	84.8614	119.471	115.113	106.706	93.1204	UP
Ccdc92b	53.267	0.733733	1.66294	0.267271	2.74528	0.00604591	0.0428398	39.2355	39.8319	50.7427	30.1121	87.6848	74.0011	47.6209	56.9069	UP
Cckar	32.947	-1.37529	0.385476	0.33072	-4.15846	3.204e-05	0.00084921	47.2838	55.376	33.1381	54.7493	9.86454	17.4725	22.9286	22.7628	DOWN
Ccnb2	376.23	-0.593661	0.662659	0.140459	-4.22657	2.37284e-05	0.000667763	505.032	486.726	339.665	479.056	299.224	249.754	336.874	313.505	DOWN
Ccnd1	1047.71	0.708916	1.63458	0.156572	4.52772	5.96238e-06	0.00021708	841.049	966.652	522.96	849.527	1384.32	1375.19	1020.32	1421.64	UP
Ccng1	350.552	1.18575	2.27481	0.143914	8.23924	1.73304e-16	8.34681e-14	214.286	216.647	270.282	156.036	482.266	535.48	446.225	483.191	UP
Cd101	22.7501	1.82991	3.55516	0.474595	3.85573	0.000115383	0.00234905	15.0906	2.91453	7.24896	14.5998	21.9212	57.5564	26.456	36.2135	UP
Cd63-ps	53.8053	0.768688	1.70372	0.231348	3.32264	0.000891687	0.0107861	33.1993	42.7464	49.7071	33.7621	64.6675	74.0011	66.1401	66.2189	UP
Cdc20b	43.074	0.851921	1.8049	0.332783	2.55999	0.0104676	0.0632897	27.1631	26.2308	21.7469	47.4494	49.3227	32.8894	59.0852	80.7043	UP
Cdh13	510.078	-0.909221	0.532473	0.329412	-2.76013	0.00577784	0.0415693	670.022	468.267	1054.21	470.844	267.439	378.228	461.217	310.401	DOWN
Cdh22	97.3541	1.21876	2.32746	0.30231	4.03148	5.54257e-05	0.00132526	45.2718	91.3219	32.1025	64.7867	143.584	176.78	74.9588	150.027	UP
Cdh8	218.897	-0.86903	0.547515	0.18604	-4.6712	2.99443e-06	0.000125565	281.691	237.048	402.835	210.785	138.104	166.502	163.146	151.062	DOWN
Cdkn1a	108.201	1.46953	2.76931	0.184812	7.95149	1.84276e-15	7.39604e-13	52.314	54.4045	48.6716	73.9116	141.392	152.113	177.255	165.547	UP
Cdkn2d	124.606	0.698482	1.6228	0.172346	4.05279	5.06114e-05	0.00123467	93.5617	116.581	86.9875	83.0364	135.911	144.919	151.681	184.171	UP
Cdkn3	52.8307	-0.66639	0.630081	0.271183	-2.45735	0.0139967	0.0774344	63.3805	59.2621	43.4937	93.0738	42.7463	35.9727	48.5027	36.2135	DOWN
Cdpf1	35.6544	-0.817617	0.567378	0.295585	-2.7661	0.00567316	0.0410616	32.1933	43.7179	55.9205	50.1869	21.9212	22.6114	25.5742	33.1095	DOWN
Cdr2	274.109	0.65633	1.57607	0.147308	4.45548	8.37058e-06	0.000287378	230.383	240.934	149.121	229.947	366.084	309.366	318.354	348.684	UP
Cemip	154.592	-1.17196	0.443819	0.155687	-7.52764	5.16657e-14	1.47066e-11	211.268	231.219	216.433	198.922	80.0124	98.6681	116.407	83.8083	DOWN
Cep41	139.442	-0.608618	0.655824	0.15405	-3.95078	7.78982e-05	0.0017278	192.153	169.043	166.726	145.998	111.798	96.6125	111.115	122.091	DOWN
Cerkl	36.6231	3.87028	14.6242	0.421467	9.18288	4.19703e-20	3.93052e-17	6.03624	0.971509	9.32009	2.73747	75.6282	70.9177	59.0852	68.2883	UP
Cfap53	20.6461	1.16674	2.24504	0.386041	3.02233	0.00250837	0.0227214	14.0845	9.71509	15.5335	11.8623	20.8251	27.7504	40.5659	24.8321	UP
Cfh	80.6628	0.77445	1.71054	0.29988	2.58253	0.00980781	0.0604277	46.2778	57.3191	85.9519	49.2744	67.9557	71.9455	169.319	97.2591	UP
Cgnl1	407.809	0.602444	1.51829	0.133111	4.52588	6.01437e-06	0.0002185	288.733	367.231	317.918	322.108	518.436	391.589	590.852	465.602	UP
Cgref1	38.0902	0.861946	1.81749	0.318072	2.70991	0.00673024	0.0464395	30.1812	35.9458	14.4979	27.3747	41.6503	68.8621	45.8571	40.3522	UP
Cgrrf1	82.4214	0.867111	1.82401	0.200293	4.32921	1.49646e-05	0.000459967	59.3563	58.2906	69.3829	46.5369	115.086	120.252	89.0687	101.398	UP
Chga	444.95	-0.842351	0.557734	0.179735	-4.68662	2.77759e-06	0.000118237	495.977	505.185	826.381	458.982	278.399	311.421	403.896	279.361	DOWN
Chl1	722.759	-1.39022	0.381506	0.537901	-2.58453	0.00975122	0.0602795	787.729	590.678	2276.17	531.068	329.914	356.644	582.915	326.956	DOWN
Chrna3	44.6231	0.720302	1.64753	0.240493	2.9951	0.00274354	0.0240874	35.2114	35.9458	28.9958	34.6746	54.803	55.5008	59.0852	52.7682	UP
Chrna4	29.6988	1.3304	2.51473	0.334034	3.98284	6.80961e-05	0.00154912	20.1208	12.6296	14.4979	20.0747	58.0912	41.1117	31.7472	39.3175	UP
Chrna7	129.781	-0.690729	0.619541	0.233614	-2.95671	0.00310937	0.026339	152.918	111.724	247.5	129.573	101.934	97.6403	117.288	79.6696	DOWN
Ckap4	838.921	0.719067	1.64612	0.101722	7.06897	1.56093e-12	3.60448e-10	593.563	761.663	605.806	574.868	1141	1037.04	1006.21	991.215	UP
Clgn	63.0856	-0.6915	0.61921	0.208731	-3.31287	0.000923426	0.0110441	72.4348	83.5498	71.454	83.9489	54.803	49.3341	46.739	42.4215	DOWN
Clip3	2145.89	-0.633219	0.644736	0.10879	-5.82056	5.86505e-09	6.50441e-07	2517.11	2335.51	3295.17	2291.26	1601.34	1727.72	1778.73	1620.29	DOWN
Clmp	498.107	-0.884711	0.541596	0.319656	-2.76769	0.00564546	0.0409314	568.412	462.438	1079.06	475.406	349.643	319.644	431.233	299.02	DOWN
Cln5	55.9945	0.8444	1.79552	0.286582	2.94645	0.00321444	0.0269575	44.2657	23.3162	39.3515	52.9243	71.2439	90.4458	46.739	79.6696	UP
Clp1	128.506	0.785495	1.72368	0.172126	4.5635	5.03075e-06	0.000186792	78.4711	102.98	112.877	83.0364	188.522	148.002	145.508	168.651	UP
Cnp	96.718	1.02527	2.03535	0.17979	5.70261	1.17985e-08	1.16308e-06	53.3201	59.2621	65.2406	76.649	128.239	129.502	120.816	140.715	UP
Cnr1	1391.29	-0.614551	0.653133	0.121644	-5.05204	4.37112e-07	2.52342e-05	1611.67	1542.76	2057.67	1522.94	1010.57	1067.88	1348.38	968.452	DOWN
Cntn4	41.8473	0.812964	1.75682	0.324602	2.50449	0.0122627	0.070708	33.1993	40.8034	28.9958	18.2498	72.34	57.5564	30.8654	52.7682	UP
Col13a1	64.5983	0.763402	1.69749	0.26967	2.83088	0.00464205	0.035488	40.2416	56.3475	49.7071	45.6244	74.5321	46.2507	111.997	92.0857	UP
Col15a1	250.478	0.595709	1.51121	0.158602	3.756	0.00017265	0.00311268	211.268	230.248	141.872	214.435	311.281	251.809	350.102	292.812	UP
Col20a1	35.85	1.6159	3.06503	0.303252	5.32856	9.8992e-08	7.19271e-06	22.1329	21.3732	11.3912	15.5123	58.0912	50.3618	45.8571	62.0802	UP
Col26a1	241.023	0.593482	1.50888	0.174831	3.3946	0.000687284	0.00886422	184.105	223.447	155.335	205.31	370.468	223.031	325.409	241.078	UP
Col27a1	292.01	1.18193	2.26881	0.141431	8.35694	6.43649e-17	3.28787e-14	178.069	174.872	144.979	215.347	457.057	424.478	337.755	403.522	UP
Col6a2	275.378	0.592705	1.50807	0.177225	3.34436	0.000824726	0.0101552	191.147	272.994	169.833	244.547	326.626	271.337	434.761	291.777	UP
Col9a2	79.3371	0.833947	1.78256	0.255898	3.2589	0.00111846	0.0126724	80.4831	46.6324	33.1381	67.5241	124.951	99.6959	100.533	81.739	UP
Coprs	111.362	0.674562	1.59611	0.190297	3.54479	0.000392921	0.0058373	94.5677	79.6638	67.3117	101.286	109.606	149.03	126.989	162.443	UP
Copz2	33.0653	1.21744	2.32534	0.375732	3.24019	0.0011945	0.0132996	22.1329	27.2023	17.6046	12.7748	63.5715	29.806	63.4945	27.9361	UP
Cpne4	23.194	-1.41892	0.373991	0.512786	-2.76708	0.00565602	0.0409727	27.1631	21.3732	64.205	22.8122	12.0567	7.19455	25.5742	5.17335	DOWN
CR974462.6	32.4047	-0.94806	0.518329	0.304391	-3.11461	0.00184185	0.0182576	51.308	33.0313	43.4937	42.887	19.7291	18.5003	20.283	30.0055	DOWN
Crabp2	222.875	1.01876	2.02618	0.422534	2.41107	0.0159057	0.0849297	126.761	216.647	61.0983	184.323	378.141	310.393	186.956	318.679	UP
Crb1	68.3369	0.610888	1.5272	0.229568	2.66103	0.00779023	0.0513972	44.2657	66.0626	43.4937	62.0492	72.34	101.751	68.7857	87.947	UP
Creb3l4	22.3059	-1.06033	0.479521	0.379208	-2.79618	0.00517108	0.038428	29.1751	32.0598	27.9603	31.9371	8.76848	14.3891	23.8104	10.3467	DOWN
Creg1	63.2889	0.940489	1.91918	0.291913	3.22181	0.00127384	0.0139526	47.2838	61.2051	20.7113	43.7994	96.4533	68.8621	63.4945	104.502	UP
Crispld1	89.419	0.61385	1.53034	0.257476	2.38411	0.0171207	0.0893786	53.3201	96.1794	52.8138	80.299	118.374	65.7787	135.808	112.779	UP
Crlf2	26.9469	-0.799862	0.574404	0.323033	-2.4761	0.0132828	0.0746858	29.1751	32.0598	45.5649	30.1121	20.8251	22.6114	17.6374	17.5894	DOWN
Crtac1	67.5934	-0.831258	0.562039	0.257848	-3.22383	0.00126488	0.0138938	58.3503	79.6638	125.303	83.0364	49.3227	57.5564	50.2665	37.2481	DOWN
Crtap	111.257	0.695968	1.61997	0.204461	3.40391	0.000664288	0.0086604	85.5133	84.5213	65.2406	104.024	169.889	99.6959	150.799	130.369	UP
Crym	46.521	-0.966296	0.511819	0.343445	-2.81354	0.00489996	0.0369239	52.314	40.8034	101.485	52.0118	37.266	21.5836	44.9753	21.7281	DOWN
Csf1	126.274	0.607185	1.52328	0.185684	3.26999	0.0010755	0.0122997	90.5435	76.7492	119.09	114.061	176.466	135.669	169.319	128.299	UP
Csf1r	110.804	0.691792	1.61529	0.22542	3.06891	0.00214845	0.0203577	71.4288	53.433	96.3076	117.711	144.68	116.141	160.5	126.23	UP
Csmd1	399.221	-1.23925	0.423594	0.196834	-6.29589	3.05633e-10	4.68369e-08	477.869	468.267	794.278	504.606	207.155	194.253	340.401	206.934	DOWN
Cspg4	101.335	0.629463	1.54699	0.18945	3.32257	0.000891918	0.0107861	80.4831	85.4928	91.1297	62.0492	113.99	111.002	151.681	114.848	UP
CT009755.1	31.5654	1.16597	2.24384	0.3274	3.5613	0.000369017	0.00558395	12.0725	19.4302	28.9958	17.3373	48.2266	48.3063	32.6291	45.5255	UP
Ctsd	235.163	0.617819	1.53455	0.11715	5.27376	1.33659e-07	9.23396e-06	168.009	203.045	181.224	189.798	295.936	276.476	293.662	273.153	UP
Cttnbp2	1386.32	-0.85203	0.554005	0.314291	-2.71096	0.00670896	0.0463116	1546.28	1282.39	2886.12	1422.57	847.255	904.458	1327.21	874.297	DOWN
Cx3cr1	58.3874	0.775993	1.71237	0.234377	3.31087	0.000930062	0.0111034	47.2838	50.5185	33.1381	41.062	90.973	70.9177	73.195	60.0109	UP
Cxxc4	535.395	0.58526	1.50031	0.137632	4.25237	2.11523e-05	0.000608473	504.026	484.783	353.128	370.47	687.23	712.26	519.42	651.843	UP
Cyb561d1	76.4024	-0.84218	0.5578	0.203142	-4.14576	3.38683e-05	0.000886518	93.5617	100.065	109.77	89.4239	56.9951	57.5564	63.4945	40.3522	DOWN
Cyb5rl	28.9143	0.922238	1.89505	0.371931	2.4796	0.0131531	0.0741298	27.1631	21.3732	19.6757	11.8623	51.5148	35.9727	44.0934	19.6587	UP
Cyp2j9	25.934	-0.842524	0.557667	0.339995	-2.47805	0.0132104	0.0743533	28.1691	34.9743	31.067	39.237	19.7291	14.3891	26.456	13.4507	DOWN
Cyp4f16	104.743	-0.588961	0.664821	0.165548	-3.55765	0.000374182	0.00562674	112.676	118.524	141.872	130.486	80.0124	82.2234	87.3049	84.843	DOWN
Cyp4f17	83.1664	0.61026	1.52653	0.237383	2.57078	0.0101471	0.0619967	45.2718	51.49	79.7385	86.6864	93.1651	83.2512	100.533	125.195	UP
D10Wsu102e	5967.56	0.870164	1.82787	0.0993766	8.75622	2.01903e-18	1.41812e-15	4789.75	4108.51	3773.6	4209.31	7669.13	8952.07	6526.7	7711.4	UP
D1Ertd622e	1240.32	1.3114	2.48182	0.121782	10.7684	4.85619e-27	2.04652e-23	749.499	728.632	581.988	788.39	1718.62	2120.34	1440.97	1794.12	UP
D430040D24Rik	20.4201	-1.08606	0.471045	0.3975	-2.73224	0.00629061	0.0441285	27.1631	25.2592	41.4226	17.3373	13.1527	10.2779	13.228	15.5201	DOWN
Dab2	321.48	0.686363	1.60922	0.192716	3.56152	0.000368712	0.00558395	206.238	253.564	294.1	232.685	398.966	336.088	574.978	275.222	UP
Dcn	194.519	0.608979	1.52518	0.203406	2.99391	0.00275426	0.0241438	126.761	170.014	168.797	151.473	217.02	165.475	346.574	210.038	UP
Dcxr	23.7201	1.21477	2.32103	0.382474	3.17608	0.0014928	0.015768	18.1087	7.77207	17.6046	13.6873	37.266	22.6114	28.2198	44.4908	UP
Ddias	136.644	1.01417	2.01975	0.192207	5.27647	1.31696e-07	9.13583e-06	107.646	69.9487	68.3473	115.886	164.409	190.142	208.121	168.651	UP
Ddit4l	78.1146	1.78579	3.44807	0.245576	7.27182	3.54667e-13	8.66467e-11	33.1993	37.8889	26.9247	41.9745	107.414	148.002	84.6593	144.854	UP
Ddx28	115.207	0.868585	1.82587	0.169888	5.11269	3.1761e-07	1.91213e-05	79.4771	71.8917	84.9163	89.4239	163.313	132.585	131.398	168.651	UP
Degs1	171.356	0.734332	1.66363	0.134928	5.44239	5.25709e-08	4.16051e-06	141.852	123.382	119.09	130.486	196.195	208.642	220.467	230.732	UP
Deup1	31.1851	1.02287	2.03196	0.407073	2.51274	0.0119797	0.0695344	29.1751	9.71509	11.3912	31.9371	33.9779	26.7226	53.7939	52.7682	UP
Dgki	401.731	-0.690832	0.619497	0.145164	-4.75898	1.94577e-06	8.84092e-05	502.014	436.208	650.335	396.932	278.399	326.838	321	302.124	DOWN
Dglucy	44.2233	0.978456	1.97035	0.271929	3.5982	0.000320426	0.00500131	26.157	27.2023	28.9958	36.4995	52.6109	80.1678	49.3846	52.7682	UP
Disp3	243.177	-0.887737	0.540461	0.379201	-2.34107	0.0192285	0.0964398	241.449	210.818	580.952	229.947	178.658	157.252	204.593	141.75	DOWN
Dlec1	43.4476	0.711916	1.63798	0.301341	2.36249	0.0181525	0.0929236	29.1751	23.3162	39.3515	40.1495	39.4582	39.0561	68.7857	68.2883	UP
Dlg2	205.973	-0.833139	0.561306	0.223434	-3.72879	0.000192402	0.00336096	253.522	214.704	375.91	212.61	128.239	122.307	220.467	120.022	DOWN
Dlgap3	166.936	0.58606	1.50114	0.147965	3.9608	7.46997e-05	0.00167226	116.701	155.441	143.944	117.711	204.963	199.392	179.019	218.316	UP
Dlk1	112.902	0.62151	1.53848	0.254061	2.4463	0.014433	0.0793276	81.4892	129.211	41.4226	103.111	143.584	141.835	120.816	141.75	UP
Dnaaf3	28.356	1.20248	2.30135	0.385305	3.12085	0.00180328	0.0180296	9.05435	11.6581	16.569	31.0246	41.6503	46.2507	28.2198	42.4215	UP
Dnhd1	69.0355	0.697262	1.62142	0.204354	3.41203	0.000644815	0.00847206	62.3744	52.4615	44.5293	51.0993	95.3572	78.1122	79.3681	88.9817	UP
Dock2	27.3251	0.887085	1.84943	0.351536	2.52345	0.0116209	0.0683511	13.0785	26.2308	24.8536	12.7748	25.2094	38.0283	37.0385	41.3868	UP
Dock5	191.079	0.62097	1.53791	0.202883	3.06073	0.00220796	0.0206447	140.845	208.875	89.0586	163.335	206.059	235.365	263.679	221.42	UP
Dock8	23.0908	1.41776	2.6717	0.443115	3.19952	0.00137658	0.0148464	14.0845	7.77207	19.6757	9.12488	33.9779	16.4447	54.6758	28.9708	UP
Dok5	152.725	-1.25768	0.418216	0.190795	-6.59178	4.3458e-11	8.13968e-09	203.22	200.131	266.14	193.448	73.436	71.9455	123.462	90.0164	DOWN
Dpf3	77.0857	-0.92675	0.526042	0.327186	-2.83249	0.00461871	0.0353416	96.5798	73.8347	182.259	52.0118	46.0345	57.5564	67.022	41.3868	DOWN
Dpy19l1	1251.58	-0.688061	0.620687	0.156045	-4.40939	1.03663e-05	0.000342855	1386.32	1227.99	2239.93	1324.93	925.075	922.958	1093.52	891.886	DOWN
Draxin	1051.74	-0.915591	0.530127	0.258606	-3.54049	0.000399386	0.00590866	1267.61	1111.41	1988.29	1132.4	603.929	661.899	984.165	664.259	DOWN
Dscam	425.965	-0.63181	0.645366	0.164196	-3.84791	0.000119131	0.00239014	466.802	398.319	741.465	465.369	322.242	333.005	365.975	314.54	DOWN
Dsel	236.03	0.709471	1.6352	0.13043	5.43949	5.34335e-08	4.20901e-06	182.093	154.47	200.9	178.848	293.744	309.366	252.214	316.609	UP
Dtx4	882.555	0.733345	1.66249	0.132279	5.54395	2.95731e-08	2.56966e-06	651.913	737.376	469.111	792.04	1200.19	1094.6	1060.89	1054.33	UP
Dubr	248.544	-0.995501	0.501562	0.181301	-5.49087	3.99956e-08	3.33766e-06	339.035	245.792	390.408	350.396	133.719	141.835	225.758	161.409	DOWN
Dusp19	61.0968	-0.793098	0.577103	0.216621	-3.66123	0.000251004	0.00412717	85.5133	78.6923	65.2406	80.299	39.4582	48.3063	40.5659	50.6989	DOWN
Dusp26	86.7511	1.02797	2.03916	0.209831	4.89905	9.6301e-07	5.01033e-05	59.3563	69.9487	56.9561	41.9745	137.008	115.113	92.5961	121.056	UP
Dusp7	341.12	0.781754	1.71922	0.138953	5.62603	1.84409e-08	1.68944e-06	208.25	312.826	212.291	269.184	452.673	413.173	389.786	470.775	UP
Dyrk3	229.395	0.965346	1.95253	0.164318	5.87486	4.23201e-09	4.853e-07	152.918	157.385	123.232	187.06	287.168	382.339	246.041	299.02	UP
E130308A19Rik	764.374	0.643779	1.56242	0.122753	5.24451	1.56702e-07	1.04823e-05	616.702	666.455	456.684	645.129	953.572	1014.43	788.39	973.625	UP
E130317F20Rik	113.886	-0.721734	0.606368	0.165198	-4.36891	1.24866e-05	0.000400928	158.954	144.755	123.232	139.611	94.2612	86.3346	74.9588	88.9817	DOWN
E430024I08Rik	117.226	0.887896	1.85048	0.17019	5.21708	1.81764e-07	1.19874e-05	87.5254	72.8632	78.7029	89.4239	162.217	138.752	131.398	176.929	UP
Ebf2	138.055	0.740941	1.67127	0.268051	2.76418	0.00570662	0.0412507	112.676	136.011	44.5293	119.536	227.981	151.086	130.516	182.102	UP
Ecel1	25.9145	1.71643	3.28622	0.593857	2.89031	0.00384866	0.030835	15.0906	11.6581	3.1067	18.2498	54.803	54.473	4.40934	45.5255	UP
Eda2r	68.0866	2.43281	5.39945	0.240953	10.0966	5.71702e-24	1.20465e-20	20.1208	14.5726	23.818	26.4622	108.51	129.502	105.824	115.883	UP
Eef1a2	146.944	-1.01452	0.494993	0.228669	-4.43664	9.13752e-06	0.000310547	168.009	182.644	280.638	156.036	83.3006	66.8065	130.516	107.606	DOWN
Efcab5	46.8264	-0.641729	0.640944	0.243674	-2.63356	0.00844953	0.0544056	63.3805	52.4615	60.0628	52.9243	30.6897	35.9727	44.9753	34.1441	DOWN
Ehd2	138.736	0.590067	1.50532	0.146277	4.03391	5.48574e-05	0.00131728	124.749	106.866	96.3076	114.974	160.025	171.641	166.673	168.651	UP
Ehd3	131.628	0.609779	1.52602	0.158233	3.85369	0.000116353	0.00236024	97.5858	95.2079	102.521	121.361	138.104	179.864	156.972	161.409	UP
Eif4ebp1	84.2537	0.885535	1.84745	0.261217	3.39004	0.000698824	0.00893785	69.4167	71.8917	32.1025	62.9617	87.6848	106.89	89.9505	153.131	UP
Elf4	54.8547	0.676398	1.59814	0.258397	2.61767	0.00885327	0.0562549	29.1751	46.6324	39.3515	53.8368	54.803	61.6676	88.1868	65.1843	UP
Emid1	129.56	-0.585933	0.666218	0.198382	-2.95356	0.00314128	0.0264914	147.888	105.895	185.366	183.41	87.6848	94.5569	119.934	111.744	DOWN
Emilin1	306.605	0.704901	1.63003	0.118139	5.96672	2.42075e-09	3.00808e-07	218.311	253.564	225.753	234.51	441.712	343.283	381.849	353.857	UP
Emilin2	50.7283	0.717394	1.64421	0.247479	2.8988	0.00374589	0.0302271	50.302	28.1738	32.1025	42.887	64.6675	57.5564	67.022	63.1149	UP
Eml6	97.7308	-0.713973	0.609639	0.221674	-3.22082	0.00127825	0.0139737	134.809	106.866	152.228	92.1613	74.5321	94.5569	74.9588	51.7335	DOWN
Emx2os	290.458	0.637057	1.55515	0.170559	3.7351	0.000187637	0.00331551	207.244	243.849	211.255	246.372	294.84	465.59	259.269	395.244	UP
Enpp3	35.2988	0.759506	1.69291	0.275649	2.75533	0.00586324	0.0420045	25.151	25.2592	26.9247	27.3747	53.7069	37.0005	41.4478	45.5255	UP
Epb41l4a	255.454	0.696005	1.62001	0.143364	4.8548	1.20505e-06	5.92233e-05	224.347	174.872	164.655	215.347	303.609	345.338	263.679	351.788	UP
Etl4	2113.44	-0.814486	0.568611	0.0882364	-9.23073	2.68803e-20	2.66542e-17	2882.3	2694.97	2470.86	2732.9	1377.75	1494.41	1777.85	1476.48	DOWN
Eva1c	30.0766	-0.990813	0.503194	0.386716	-2.56212	0.0104036	0.0630385	39.2355	30.1168	32.1025	58.3993	29.5936	23.6392	20.283	7.2427	DOWN
F13a1	108.202	0.73234	1.66133	0.221931	3.29985	0.000967369	0.0114354	72.4348	98.1224	77.6674	77.5615	129.335	96.6125	194.893	118.987	UP
F730043M19Rik	150.69	-1.01762	0.493932	0.159565	-6.37743	1.80084e-10	2.94726e-08	200.202	221.504	187.437	198.922	88.7809	85.3068	126.107	97.2591	DOWN
Fam114a1	101.516	0.603606	1.51951	0.196744	3.06798	0.00215514	0.0203868	68.4107	75.7777	77.6674	100.374	129.335	91.4736	142.863	126.23	UP
Fam135b	62.3001	-0.79605	0.575924	0.31209	-2.55071	0.0107505	0.0646756	92.5556	59.2621	115.983	49.2744	39.4582	33.9172	69.6676	38.2828	DOWN
Fam171a1	589.829	0.688962	1.61212	0.095407	7.2213	5.14935e-13	1.22257e-10	424.549	490.612	425.617	464.457	729.976	798.595	654.346	730.478	UP
Fam173a	167.234	0.770607	1.70599	0.160539	4.80013	1.58559e-06	7.38352e-05	99.5979	109.781	126.339	157.86	219.212	217.892	187.838	219.35	UP
Fam189a1	41.8351	0.727397	1.65565	0.298796	2.43443	0.0149154	0.0810539	35.2114	28.1738	46.6004	16.4248	53.7069	53.4452	49.3846	51.7335	UP
Fam210a	544.268	0.6568	1.57658	0.101784	6.45285	1.09765e-10	1.85031e-08	414.488	490.612	376.946	406.97	695.998	646.482	619.071	703.576	UP
Fam217b	50.7829	0.872644	1.83102	0.276296	3.15837	0.00158654	0.0164986	43.2597	17.4872	44.5293	38.3245	62.4754	74.0011	59.967	66.2189	UP
Fam222a	94.0669	0.886642	1.84887	0.266823	3.32296	0.000890683	0.0107861	49.2959	90.3504	89.0586	35.587	138.104	122.307	94.3599	133.473	UP
Fam49a	862.698	-0.888113	0.54032	0.30678	-2.89496	0.00379213	0.030498	941.653	923.905	1808.1	807.552	511.86	595.092	785.744	527.682	DOWN
Fancf	112.297	1.11094	2.15986	0.176342	6.29989	2.97858e-10	4.60641e-08	91.5496	63.1481	61.0983	68.4366	155.641	167.53	141.981	148.993	UP
Fbll1	39.3642	0.920583	1.89288	0.261667	3.51815	0.000434564	0.0063096	32.1933	26.2308	26.9247	23.7247	52.6109	47.2785	57.3214	48.6295	UP
Fbln2	181.53	0.624799	1.542	0.199047	3.13895	0.00169552	0.017343	141.852	165.157	122.197	141.436	325.53	165.475	194.011	196.587	UP
Fcrls	53.7407	1.07963	2.1135	0.304575	3.54472	0.000393032	0.0058373	21.1268	31.0883	57.9916	28.2871	81.1085	56.5286	91.7143	62.0802	UP
Fem1c	723.294	0.597698	1.5133	0.0998471	5.98613	2.14886e-09	2.7442e-07	573.442	550.846	622.375	554.793	932.747	923.986	724.895	903.268	UP
Fgf11	117.369	-0.863493	0.54962	0.249994	-3.45405	0.000552232	0.00754374	148.894	124.353	214.362	119.536	62.4754	65.7787	126.989	76.5656	DOWN
Fgf15	61.3841	1.62833	3.09154	0.332556	4.89639	9.76118e-07	5.06118e-05	42.2536	30.1168	22.7824	24.6372	139.2	93.5291	42.3297	96.2244	UP
Fgfbp3	216.157	0.843892	1.79489	0.148428	5.68553	1.30407e-08	1.27068e-06	128.773	169.043	141.872	177.935	283.88	290.865	227.522	309.367	UP
Fhad1	42.3949	0.963674	1.95027	0.384453	2.50661	0.0121895	0.070466	18.1087	10.6866	50.7427	35.587	58.0912	38.0283	67.9038	60.0109	UP
Fhl3	69.4237	0.724363	1.65217	0.245538	2.95011	0.00317661	0.0267339	57.3442	75.7777	34.1736	41.9745	93.1651	76.0567	83.7775	93.1204	UP
Fignl2	23.5184	1.36186	2.57016	0.509375	2.67359	0.00750441	0.0500047	15.0906	10.6866	1.03557	25.5497	41.6503	22.6114	29.1016	42.4215	UP
Filip1l	51.4988	0.72424	1.65203	0.260813	2.77686	0.00548874	0.0401404	38.2295	39.8319	34.1736	42.887	76.7242	40.0839	63.4945	76.5656	UP
Fkbp10	179.58	0.938383	1.91638	0.147888	6.34521	2.22118e-10	3.60023e-08	118.713	128.239	126.339	119.536	270.727	202.475	263.679	206.934	UP
Fmo1	74.8802	0.692665	1.61627	0.245816	2.81782	0.0048351	0.0365658	47.2838	69.9487	60.0628	52.0118	99.7415	58.5842	123.462	87.947	UP
Fn3krp	209.024	0.657145	1.57696	0.139474	4.71161	2.45763e-06	0.000107886	173.039	168.071	125.303	181.585	281.687	249.754	243.396	249.356	UP
Fndc3c1	193.591	1.58143	2.99266	0.509498	3.1039	0.00190989	0.0186529	81.4892	161.271	28.9958	115.886	332.106	326.838	177.255	324.887	UP
Fosl2	119.917	-1.0063	0.497823	0.264495	-3.8046	0.000142033	0.00269016	141.852	125.325	267.176	106.761	80.0124	81.1956	97.0055	60.0109	DOWN
Frs3	74.5639	0.750807	1.68273	0.208167	3.60676	0.000310047	0.00489827	68.4107	48.5755	56.9561	48.3619	101.934	86.3346	79.3681	106.571	UP
Fstl5	242.377	-0.618802	0.651211	0.143091	-4.32453	1.52857e-05	0.000466614	287.727	305.054	302.385	278.309	248.806	183.975	175.492	157.27	DOWN
G630022F23Rik	27.6088	-0.883186	0.542169	0.335252	-2.6344	0.00842867	0.0543299	39.2355	39.8319	32.1025	31.9371	18.633	29.806	15.8736	13.4507	DOWN
Gca	85.9172	-0.854024	0.553239	0.205479	-4.15627	3.23488e-05	0.00085337	93.5617	114.638	121.161	114.061	44.9385	61.6676	79.3681	57.9416	DOWN
Gemin6	118.702	0.672867	1.59424	0.18126	3.71217	0.000205487	0.00355272	98.5918	103.951	64.205	98.5487	165.505	148.002	126.989	143.819	UP
Gemin7	175.295	0.76542	1.69987	0.144719	5.28902	1.22973e-07	8.60144e-06	149.9	131.154	122.197	115.886	230.173	235.365	186.956	230.732	UP
Ggta1	77.6081	0.895482	1.86023	0.208254	4.29994	1.70842e-05	0.000508814	62.3744	56.3475	52.8138	45.6244	84.3966	119.224	87.3049	112.779	UP
Ghdc	25.0603	0.95948	1.94461	0.358202	2.6786	0.00739305	0.0495329	15.0906	12.6296	15.5335	24.6372	40.5542	21.5836	35.2747	35.1788	UP
Gimap6	32.1455	1.03211	2.04501	0.340276	3.03316	0.0024201	0.0221715	22.1329	18.4587	13.4623	30.1121	48.2266	26.7226	43.2115	54.8376	UP
Gipr	63.8193	-2.10908	0.231795	0.572175	-3.68607	0.000227746	0.0038318	87.5254	55.376	206.077	65.6992	14.2488	13.3613	29.9835	38.2828	DOWN
Gja1	1300.52	0.778299	1.71511	0.134089	5.80432	6.4626e-09	7.07403e-07	964.792	1101.69	658.619	1105.94	1641.9	1490.3	1716.11	1724.8	UP
Gja5	36.1702	0.807337	1.74998	0.332488	2.42817	0.0151753	0.0819378	37.2235	28.1738	13.4623	26.4622	48.2266	39.0561	62.6126	34.1441	UP
Gli1	38.1148	1.10369	2.14904	0.351396	3.14089	0.00168437	0.0172605	10.0604	37.8889	18.6402	30.1121	50.4188	41.1117	67.022	49.6642	UP
Glt1d1	96.7479	0.916044	1.88693	0.185788	4.93059	8.19799e-07	4.33359e-05	72.4348	74.8062	52.8138	67.5241	143.584	135.669	110.233	116.918	UP
Gm10033	629.682	0.973571	1.96369	0.114432	8.50782	1.77236e-17	1.03023e-14	464.79	450.78	408.013	375.945	813.277	982.57	708.14	833.945	UP
Gm10076	567.697	0.795897	1.73616	0.120204	6.62121	3.56277e-11	6.74805e-09	459.76	345.857	501.214	354.045	745.321	704.038	714.313	717.027	UP
Gm10305	22.7481	1.48495	2.79908	0.40577	3.65959	0.000252617	0.00413835	5.0302	22.3447	11.3912	9.12488	31.7857	32.8894	35.2747	34.1441	UP
Gm1043	82.9886	-1.91213	0.265701	0.576322	-3.31781	0.000907262	0.0109007	99.5979	46.6324	282.709	95.8113	23.0173	33.9172	44.9753	37.2481	DOWN
Gm10654	28.0338	-1.15778	0.448202	0.377106	-3.07017	0.0021394	0.0202834	25.151	63.1481	32.1025	34.6746	17.537	13.3613	23.8104	14.4854	DOWN
Gm10762	51.7667	-0.831567	0.561919	0.238524	-3.4863	0.000489759	0.00691446	63.3805	68.0057	62.1339	72.0866	35.0739	34.945	48.5027	30.0055	DOWN
Gm11266	341.809	-0.773867	0.584848	0.125791	-6.15202	7.65032e-10	1.0658e-07	452.718	415.806	493.965	364.083	260.862	223.031	283.961	240.044	DOWN
Gm11620	28.4932	3.74846	13.44	0.463925	8.07987	6.48344e-16	2.73228e-13	4.02416	4.85755	7.24896	0	43.8424	54.473	55.5577	57.9416	UP
Gm11839	68.5724	0.942851	1.92232	0.236329	3.98958	6.61913e-05	0.00151191	59.3563	58.2906	36.2448	33.7621	100.838	97.6403	77.6044	84.843	UP
Gm11841	48.2367	2.2921	4.89768	0.301783	7.59518	3.07363e-14	9.42041e-12	17.1027	15.5441	11.3912	20.9872	84.3966	91.4736	52.9121	92.0857	UP
Gm12020	20.9568	1.25112	2.38026	0.410359	3.04884	0.00229729	0.0213468	14.0845	11.6581	16.569	7.29991	36.17	32.8894	15.8736	33.1095	UP
Gm12063	29.5462	-1.02448	0.491589	0.336187	-3.04734	0.00230877	0.021384	49.2959	30.1168	50.7427	28.2871	20.8251	23.6392	15.8736	17.5894	DOWN
Gm12397	33.4404	-0.685926	0.621607	0.292598	-2.34426	0.0190648	0.0960187	35.2114	45.6609	38.3159	45.6244	21.9212	34.945	22.0467	23.7974	DOWN
Gm12655	24.8839	0.925804	1.89974	0.327076	2.83054	0.0046469	0.0355067	16.0966	14.5726	20.7113	17.3373	36.17	32.8894	34.3928	26.9014	UP
Gm12758	25.8742	-1.0809	0.472735	0.416969	-2.59228	0.00953434	0.0594	60.3624	23.3162	31.067	25.5497	27.4015	15.4169	11.4643	12.416	DOWN
Gm13034	25.8649	-0.940077	0.521205	0.401753	-2.33994	0.0192868	0.0967039	39.2355	45.6609	21.7469	29.1996	10.9606	19.5281	10.5824	30.0055	DOWN
Gm13146	25.4507	1.15664	2.22937	0.40605	2.84851	0.00439249	0.034106	13.0785	7.77207	15.5335	26.4622	33.9779	51.3896	32.6291	22.7628	UP
Gm13241	42.1812	0.834844	1.78366	0.289069	2.88805	0.00387641	0.0309544	32.1933	19.4302	44.5293	25.5497	48.2266	48.3063	64.3764	54.8376	UP
Gm13315	39.8356	0.824241	1.7706	0.321412	2.56444	0.0103344	0.0627544	20.1208	22.3447	22.7824	49.2744	50.4188	49.3341	42.3297	62.0802	UP
Gm13394	412.221	-1.85495	0.276442	0.752905	-2.46373	0.0137501	0.0764967	619.72	240.934	768.389	954.463	283.88	232.281	176.374	21.7281	DOWN
Gm13461	20.4135	-1.07607	0.47432	0.390621	-2.75476	0.00587356	0.0420248	25.151	25.2592	21.7469	38.3245	12.0567	18.5003	8.81868	13.4507	DOWN
Gm14443	53.9899	1.09386	2.13444	0.255058	4.28868	1.79741e-05	0.00053063	35.2114	23.3162	48.6716	31.0246	62.4754	82.2234	77.6044	71.3923	UP
Gm14853	35.6406	-0.698502	0.616212	0.297689	-2.34641	0.0189551	0.0957524	58.3503	41.7749	43.4937	32.8496	32.8818	28.7782	27.3379	19.6587	DOWN
Gm15138	30.7958	-0.931979	0.524139	0.369049	-2.52535	0.0115583	0.0681489	32.1933	57.3191	20.7113	51.0993	28.4976	15.4169	19.4011	21.7281	DOWN
Gm15681	28.0469	-1.10646	0.464433	0.389406	-2.8414	0.00449159	0.0346379	49.2959	15.5441	45.5649	42.887	17.537	22.6114	18.5192	12.416	DOWN
Gm15879	40.9242	-0.874918	0.545285	0.293808	-2.97786	0.00290268	0.0251441	46.2778	60.2336	63.1695	42.887	23.0173	27.7504	42.3297	21.7281	DOWN
Gm16576	73.2399	-0.833845	0.561032	0.219046	-3.80672	0.000140825	0.00267329	102.616	82.5783	104.592	85.7739	55.8991	63.7231	55.5577	35.1788	DOWN
Gm16835	32.9206	0.79102	1.7303	0.32707	2.4185	0.0155846	0.0834264	30.1812	18.4587	23.818	23.7247	60.2833	39.0561	26.456	41.3868	UP
Gm17750	26.9575	-1.13583	0.455073	0.404456	-2.80829	0.0049805	0.0373139	15.0906	41.7749	56.9561	34.6746	13.1527	16.4447	22.0467	15.5201	DOWN
Gm19035	63.6188	0.785718	1.72395	0.235361	3.33835	0.000842761	0.0103244	47.2838	43.7179	50.7427	44.7119	96.4533	81.1956	53.7939	91.051	UP
Gm19705	29.3589	3.44081	10.859	0.517632	6.64722	2.98671e-11	5.787e-09	15.0906	1.94302	2.07113	0.912488	53.7069	65.7787	46.739	48.6295	UP
Gm20075	37.4896	-1.0688	0.476714	0.336545	-3.17581	0.00149417	0.0157716	48.2899	55.376	35.2092	64.7867	17.537	19.5281	40.5659	18.6241	DOWN
Gm20186	66.4625	-0.789843	0.578407	0.232317	-3.39986	0.000674209	0.00876226	76.459	102.008	83.8808	73.9116	64.6675	40.0839	37.9203	52.7682	DOWN
Gm20444	22.5788	1.31337	2.48522	0.401273	3.27301	0.00106407	0.0122021	19.1147	16.5157	5.17783	10.9499	25.2094	35.9727	27.3379	40.3522	UP
Gm20501	36.9398	-1.07629	0.474246	0.279529	-3.85037	0.000117938	0.00237525	49.2959	45.6609	55.9205	49.2744	31.7857	23.6392	20.283	19.6587	DOWN
Gm2061	47.2074	-0.889953	0.539632	0.291603	-3.05194	0.00227371	0.0211523	56.3382	49.547	80.7741	59.3117	27.4015	35.9727	47.6209	20.6934	DOWN
Gm22042	42.7244	0.742166	1.67269	0.280875	2.64233	0.0082337	0.0534043	30.1812	29.1453	43.4937	25.5497	37.266	62.6954	61.7308	51.7335	UP
Gm23209	40.4054	-0.61842	0.651384	0.265639	-2.32805	0.0199093	0.0987965	53.3201	40.8034	57.9916	43.7994	27.4015	39.0561	30.8654	30.0055	DOWN
Gm23511	77.5469	0.836273	1.78543	0.211476	3.95447	7.67052e-05	0.00170358	63.3805	46.6324	69.3829	43.7994	99.7415	84.279	101.415	111.744	UP
Gm24105	45.9939	0.757917	1.69105	0.306543	2.47247	0.0134184	0.0752178	49.2959	19.4302	45.5649	22.8122	51.5148	57.5564	55.5577	66.2189	UP
Gm24305	2635.44	0.684201	1.60681	0.294072	2.32665	0.019984	0.0989341	2644.88	1601.05	2553.7	1288.43	3105.14	3039.18	2540.66	4310.44	UP
Gm24371	27.511	-0.91123	0.531732	0.337558	-2.69948	0.00694483	0.0475864	31.1872	34.0028	34.1736	43.7994	23.0173	19.5281	10.5824	23.7974	DOWN
Gm25788	88.1378	0.609429	1.52565	0.250123	2.43652	0.0148295	0.0807172	101.61	52.4615	79.7385	45.6244	98.6454	117.168	84.6593	125.195	UP
Gm2606	80.1007	-0.643293	0.64025	0.20161	-3.19078	0.00141892	0.0152058	104.628	116.581	72.4896	96.7238	63.5715	62.6954	59.967	64.1496	DOWN
Gm26165	67.694	0.596742	1.5123	0.220112	2.71108	0.00670637	0.0463116	70.4227	40.8034	56.9561	47.4494	85.4927	80.1678	72.3132	87.947	UP
Gm26604	137.718	-0.919049	0.528858	0.216096	-4.25296	2.10966e-05	0.000608473	223.341	141.84	182.259	174.285	83.3006	97.6403	134.926	64.1496	DOWN
Gm26871	120.53	0.655489	1.57515	0.173196	3.78466	0.000153921	0.00286069	98.5918	91.3219	109.77	74.824	154.544	157.252	121.698	156.235	UP
Gm27032	56.5234	0.692635	1.61623	0.28482	2.43184	0.0150225	0.0813473	28.1691	60.2336	47.636	36.4995	83.3006	85.3068	45.8571	65.1843	UP
Gm29260	351.91	-0.816974	0.567631	0.164722	-4.9597	7.06012e-07	3.8145e-05	458.754	357.515	601.663	378.683	226.884	224.059	264.56	303.159	DOWN
Gm29681	50.2878	3.46029	11.0066	0.336407	10.286	8.14597e-25	2.38562e-21	8.04831	8.74358	12.4268	4.56244	88.7809	103.807	71.4313	104.502	UP
Gm29856	20.2342	2.69043	6.45508	0.473022	5.68776	1.28719e-08	1.26152e-06	7.04227	5.82906	6.21339	2.73747	33.9779	53.4452	24.6923	27.9361	UP
Gm32061	42.8518	1.74273	3.34668	0.371021	4.69712	2.63861e-06	0.000113486	13.0785	37.8889	9.32009	18.2498	73.436	71.9455	42.3297	76.5656	UP
Gm3365	37.1385	1.05554	2.07849	0.332341	3.17606	0.00149289	0.015768	33.1993	28.1738	10.3557	24.6372	54.803	59.612	51.1483	35.1788	UP
Gm35040	825.866	-0.847349	0.555805	0.0901713	-9.39711	5.60847e-21	5.90887e-18	1093.56	1070.6	1044.89	1039.32	508.572	564.258	641.118	644.6	DOWN
Gm35394	24.8079	-0.88813	0.540314	0.34027	-2.61007	0.00905236	0.0571733	38.2295	36.9174	23.818	30.1121	13.1527	16.4447	21.1648	18.6241	DOWN
Gm3571	23.847	-0.899275	0.536156	0.344762	-2.60839	0.00909684	0.0573683	35.2114	36.9174	25.8891	26.4622	13.1527	14.3891	21.1648	17.5894	DOWN
Gm37051	44.5614	-0.725945	0.604601	0.24461	-2.96776	0.00299976	0.0256815	57.3442	53.433	60.0628	51.0993	39.4582	33.9172	29.1016	32.0748	DOWN
Gm37121	33.2449	-0.884538	0.541661	0.37108	-2.38368	0.0171403	0.0893979	43.2597	46.6324	59.0272	23.7247	33.9779	11.3057	27.3379	20.6934	DOWN
Gm37233	238.744	-0.728007	0.603737	0.144789	-5.02807	4.9545e-07	2.80464e-05	280.685	291.453	352.092	268.272	163.313	165.475	223.113	165.547	DOWN
Gm37277	24.1307	-1.09785	0.467213	0.422411	-2.599	0.00934956	0.0584807	20.1208	49.547	22.7824	39.237	6.57636	15.4169	17.6374	21.7281	DOWN
Gm37296	59.9848	0.623947	1.54109	0.222397	2.80556	0.00502298	0.0375487	39.2355	58.2906	44.5293	46.5369	82.2045	62.6954	68.7857	77.6003	UP
Gm37320	62.8501	0.664791	1.58534	0.223637	2.97264	0.00295253	0.0254322	48.2899	52.4615	33.1381	60.2242	76.7242	80.1678	79.3681	72.427	UP
Gm37331	68.3774	-0.755105	0.592503	0.249688	-3.02419	0.00249297	0.0226179	83.5013	77.7207	113.912	69.3491	37.266	47.2785	71.4313	46.5602	DOWN
Gm37510	74.9759	-0.687603	0.620885	0.239602	-2.86977	0.00410764	0.0324169	83.5013	94.2364	94.2364	97.6363	52.6109	88.3902	40.5659	48.6295	DOWN
Gm37621	131.371	2.55999	5.89702	0.229486	11.1553	6.74646e-29	3.79084e-25	40.2416	34.0028	31.067	46.5369	237.845	280.587	143.744	236.94	UP
Gm37674	203.616	-0.915584	0.530129	0.163218	-5.60956	2.02841e-08	1.81877e-06	276.661	222.476	329.31	237.247	118.374	158.28	161.382	125.195	DOWN
Gm37783	294.309	-0.758098	0.591275	0.155799	-4.86587	1.13952e-06	5.63312e-05	386.319	312.826	480.502	301.121	188.522	226.114	240.75	218.316	DOWN
Gm37795	41.9325	3.86787	14.5997	0.399995	9.6698	4.05149e-22	5.25354e-19	4.02416	3.88604	5.17783	8.2124	71.2439	96.6125	57.3214	88.9817	UP
Gm37911	32.1776	-0.868083	0.547874	0.35815	-2.4238	0.0153592	0.0825869	32.1933	40.8034	63.1695	30.1121	20.8251	35.9727	16.7555	17.5894	DOWN
Gm37953	42.8806	2.42659	5.37621	0.295418	8.21409	2.13782e-16	1.00103e-13	15.0906	18.4587	8.28452	11.8623	75.6282	74.0011	71.4313	68.2883	UP
Gm37962	55.1505	2.06705	4.19029	0.389405	5.30823	1.10695e-07	7.87337e-06	38.2295	20.4017	5.17783	20.9872	98.6454	93.5291	49.3846	114.848	UP
Gm37999	85.2784	-0.808065	0.571147	0.258018	-3.13182	0.00173726	0.0176394	98.5918	90.3504	166.726	79.3865	44.9385	61.6676	78.4862	62.0802	DOWN
Gm38036	282.149	-0.678614	0.624765	0.146822	-4.62203	3.80006e-06	0.00015037	375.253	288.538	408.013	318.458	199.483	247.698	240.75	178.998	DOWN
Gm38286	86.3519	-0.612275	0.654164	0.196441	-3.11683	0.00182805	0.0182182	98.5918	102.98	122.197	93.9863	80.0124	70.9177	71.4313	50.6989	DOWN
Gm39469	65.0081	0.809124	1.75215	0.231801	3.4906	0.000481938	0.00682691	63.3805	43.7179	46.6004	35.587	93.1651	66.8065	89.0687	81.739	UP
Gm39526	40.36	1.24797	2.37507	0.330582	3.77507	0.000159962	0.00294376	24.1449	38.8604	21.7469	10.9499	69.0518	53.4452	46.739	57.9416	UP
Gm42372	155.415	-0.899225	0.536175	0.187385	-4.7988	1.59616e-06	7.41223e-05	173.039	221.504	226.789	187.06	141.392	87.3624	82.0137	124.16	DOWN
Gm42461	29.1627	3.89704	14.898	0.50134	7.77325	7.64954e-15	2.6316e-12	0	2.91453	6.21339	5.47493	43.8424	78.1122	38.8022	57.9416	UP
Gm42548	67.7716	0.618439	1.53521	0.240723	2.56909	0.0101966	0.0621931	55.3322	61.2051	34.1736	62.9617	73.436	64.7509	89.9505	100.363	UP
Gm42651	28.1386	0.747826	1.67926	0.301004	2.48444	0.0129756	0.0734236	19.1147	19.4302	21.7469	23.7247	32.8818	32.8894	37.0385	38.2828	UP
Gm42764	23.3712	-0.817134	0.567568	0.34373	-2.37725	0.0174421	0.0904268	29.1751	25.2592	38.3159	26.4622	17.537	15.4169	14.1099	20.6934	DOWN
Gm42778	230.148	-0.730245	0.602801	0.204317	-3.57408	0.000351465	0.00538116	270.625	207.903	439.08	231.772	153.448	195.281	181.665	161.409	DOWN
Gm42840	32.0622	-0.876207	0.544798	0.319599	-2.74158	0.00611439	0.0432047	32.1933	34.0028	53.8494	45.6244	29.5936	24.667	15.8736	20.6934	DOWN
Gm42854	63.1457	-0.712736	0.610162	0.25572	-2.78718	0.00531695	0.0391831	78.4711	63.1481	113.912	58.3993	41.6503	52.4174	42.3297	54.8376	DOWN
Gm42876	32.9191	-0.845208	0.55663	0.292964	-2.88502	0.00391386	0.0311648	39.2355	41.7749	52.8138	35.587	19.7291	21.5836	24.6923	27.9361	DOWN
Gm42942	57.8986	-0.660519	0.632651	0.235877	-2.80027	0.00510606	0.0380516	87.5254	80.6353	56.9561	58.3993	48.2266	48.3063	39.6841	43.4562	DOWN
Gm42971	85.3435	-0.641444	0.641071	0.244491	-2.6236	0.0087007	0.0556191	125.755	88.4073	118.054	83.9489	53.7069	101.751	57.3214	53.8029	DOWN
Gm42979	99.048	-0.601333	0.659145	0.187324	-3.21013	0.00132676	0.014432	94.5677	138.926	115.983	127.748	71.2439	91.4736	69.6676	82.7737	DOWN
Gm43231	87.5083	-0.693124	0.618513	0.223436	-3.10211	0.00192145	0.0187456	147.888	94.2364	78.7029	111.324	65.7636	71.9455	54.6758	75.531	DOWN
Gm43281	30.4336	-0.84442	0.556934	0.343342	-2.45942	0.0139163	0.0771415	35.2114	30.1168	62.1339	29.1996	21.9212	23.6392	24.6923	16.5547	DOWN
Gm43509	32.0429	-0.973698	0.509199	0.301076	-3.23406	0.00122043	0.0135436	38.2295	35.9458	43.4937	52.0118	20.8251	18.5003	19.4011	27.9361	DOWN
Gm43517	785.391	0.631363	1.54903	0.126702	4.98305	6.25892e-07	3.42554e-05	625.756	513.928	767.354	558.443	864.791	1040.13	850.121	1062.61	UP
Gm43820	23.4918	1.17409	2.2565	0.378058	3.10557	0.0018991	0.0185799	18.1087	7.77207	12.4268	19.1623	37.266	35.9727	22.0467	35.1788	UP
Gm43843	118.236	-0.941843	0.520567	0.274464	-3.43157	0.000600108	0.00805415	130.785	98.1224	271.318	122.273	88.7809	69.8899	94.3599	70.3576	DOWN
Gm43857	45.2238	0.791453	1.73082	0.273714	2.89154	0.00383362	0.0307584	36.2174	40.8034	18.6402	36.4995	60.2833	49.3341	53.7939	66.2189	UP
Gm43860	41.2259	0.763434	1.69753	0.302106	2.52704	0.0115027	0.0679164	37.2235	31.0883	21.7469	31.9371	62.4754	68.8621	42.3297	34.1441	UP
Gm43965	45.3697	-0.84102	0.558249	0.283182	-2.96989	0.00297903	0.0255951	54.3261	54.4045	48.6716	75.7365	28.4976	20.5559	41.4478	39.3175	DOWN
Gm44068	196.731	-0.641528	0.641034	0.195276	-3.28524	0.00101895	0.0118295	247.486	172.929	339.665	199.835	128.239	166.502	170.201	148.993	DOWN
Gm44167	52.4124	-0.739806	0.59882	0.240758	-3.07282	0.00212044	0.0201717	52.314	60.2336	78.7029	71.1741	41.6503	39.0561	44.0934	32.0748	DOWN
Gm44439	49.5497	-1.49893	0.353816	0.45198	-3.31636	0.000911967	0.0109343	60.3624	38.8604	159.477	34.6746	19.7291	17.4725	44.0934	21.7281	DOWN
Gm44441	37.8666	-1.2837	0.41074	0.474254	-2.70678	0.00679388	0.0467638	46.2778	19.4302	113.912	35.587	13.1527	25.6948	34.3928	14.4854	DOWN
Gm44645	93.717	-1.40165	0.378496	0.217463	-6.44546	1.1525e-10	1.92353e-08	106.64	162.242	122.197	153.298	35.0739	58.5842	59.967	51.7335	DOWN
Gm44741	23.2586	-1.70477	0.30677	0.445753	-3.82448	0.000131048	0.0025509	34.2053	24.2877	60.0628	23.7247	15.3448	5.13896	8.81868	14.4854	DOWN
Gm44801	40.5092	0.629696	1.54724	0.269133	2.33972	0.0192981	0.0967314	31.1872	29.1453	43.4937	23.7247	51.5148	44.1951	51.1483	49.6642	UP
Gm44836	20.7022	1.2776	2.42436	0.536599	2.38093	0.017269	0.0899445	25.151	6.80057	7.24896	9.12488	24.1133	49.3341	9.70055	34.1441	UP
Gm44899	38.1919	0.660258	1.58036	0.274866	2.4021	0.016301	0.0863024	22.1329	27.2023	35.2092	33.7621	41.6503	55.5008	41.4478	48.6295	UP
Gm45159	66.7733	-0.984972	0.505236	0.274322	-3.59057	0.00032996	0.00511696	84.5073	75.7777	125.303	70.2616	36.17	34.945	67.9038	39.3175	DOWN
Gm45262	44.9022	-0.989571	0.503627	0.268583	-3.68442	0.000229222	0.0038486	58.3503	51.49	77.6674	52.0118	25.2094	27.7504	38.8022	27.9361	DOWN
Gm45264	128.799	-0.626217	0.647873	0.218641	-2.86413	0.00418162	0.0328469	193.16	116.581	201.935	114.061	118.374	86.3346	111.997	87.947	DOWN
Gm45358	31.8746	0.874324	1.83315	0.350781	2.49251	0.0126845	0.0723021	21.1268	26.2308	9.32009	32.8496	43.8424	43.1673	30.8654	47.5949	UP
Gm45652	96.5671	-1.01228	0.495761	0.30524	-3.31634	0.000912035	0.0109343	99.5979	117.553	215.398	84.8614	53.7069	53.4452	101.415	46.5602	DOWN
Gm45769	32.2464	1.25128	2.38052	0.325635	3.84258	0.00012175	0.00243745	17.1027	15.5441	19.6757	23.7247	54.803	58.5842	34.3928	34.1441	UP
Gm46378	48.1971	-0.595087	0.662005	0.242751	-2.45142	0.0142292	0.0784373	70.4227	57.3191	56.9561	47.4494	42.7463	35.9727	40.5659	34.1441	DOWN
Gm46404	27.5976	-0.813121	0.569149	0.336169	-2.41879	0.0155722	0.0833998	49.2959	34.9743	31.067	25.5497	18.633	15.4169	22.0467	23.7974	DOWN
Gm46409	38.0291	-0.822988	0.56527	0.316554	-2.59983	0.00932693	0.0583681	62.3744	44.6894	60.0628	27.3747	27.4015	22.6114	25.5742	34.1441	DOWN
Gm47075	25.5692	1.2232	2.33463	0.365022	3.35102	0.000805134	0.00999421	17.1027	15.5441	18.6402	10.0374	49.3227	39.0561	23.8104	31.0401	UP
Gm47484	29.1169	-0.751235	0.594095	0.318849	-2.35608	0.018469	0.0941718	35.2114	38.8604	31.067	41.062	18.633	29.806	23.8104	14.4854	DOWN
Gm47590	41.4114	-0.798371	0.574998	0.256509	-3.11245	0.00185542	0.0183455	56.3382	46.6324	48.6716	58.3993	36.17	29.806	27.3379	27.9361	DOWN
Gm47694	64.9175	-0.592208	0.663327	0.229386	-2.58171	0.00983121	0.0605276	91.5496	80.6353	66.2762	73.9116	58.0912	56.5286	58.2033	34.1441	DOWN
Gm47860	133.263	3.6373	12.4433	0.253121	14.3698	8.00286e-47	1.34904e-42	29.1751	18.4587	11.3912	20.0747	248.806	309.366	176.374	252.46	UP
Gm48796	61.5995	-0.867854	0.547961	0.238657	-3.63641	0.000276462	0.00445728	76.459	100.065	81.8096	60.2242	39.4582	54.473	44.0934	36.2135	DOWN
Gm49307	50.6025	-0.747429	0.595664	0.264522	-2.82559	0.00471942	0.0359329	60.3624	56.3475	53.8494	83.0364	33.9779	51.3896	37.9203	27.9361	DOWN
Gm49329	36.2983	-0.805653	0.572103	0.280976	-2.86734	0.00413936	0.0326201	53.3201	37.8889	40.387	52.9243	25.2094	31.8616	22.9286	25.8668	DOWN
Gm49660	58.4426	-0.740789	0.598412	0.285772	-2.59224	0.0095353	0.0594	71.4288	59.2621	113.912	48.3619	35.0739	53.4452	46.739	39.3175	DOWN
Gm5452	20.5271	1.62982	3.09475	0.458918	3.55144	0.000383126	0.00574076	16.0966	10.6866	5.17783	8.2124	19.7291	19.5281	36.1566	48.6295	UP
Gm5466	106.706	-1.19658	0.436307	0.208065	-5.75101	8.87099e-09	9.11818e-07	172.033	164.185	156.37	102.199	69.0518	67.8343	72.3132	49.6642	DOWN
Gm5857	62.9841	1.12346	2.17869	0.27477	4.08872	4.33759e-05	0.00109295	39.2355	22.3447	44.5293	52.0118	108.51	80.1678	60.8489	96.2244	UP
Gm6161	30.973	0.926062	1.90008	0.34608	2.67586	0.00745382	0.0498212	14.0845	34.9743	12.4268	23.7247	37.266	38.0283	39.6841	47.5949	UP
Gm6170	27.7415	1.10496	2.15093	0.370543	2.982	0.00286375	0.0248836	8.04831	12.6296	26.9247	22.8122	44.9385	30.8338	40.5659	35.1788	UP
Gm7045	56.2374	0.666955	1.58772	0.242084	2.75505	0.00586827	0.0420049	41.2476	47.604	28.9958	55.6618	75.6282	63.7231	74.9588	62.0802	UP
Gm7061	46.7303	4.51577	22.8761	0.443747	10.1764	2.5262e-24	6.08345e-21	2.01208	6.80057	3.1067	3.64995	74.5321	124.363	71.4313	87.947	UP
Gm7324	71.0024	1.01133	2.01578	0.224101	4.51285	6.3961e-06	0.000229402	46.2778	48.5755	48.6716	44.7119	77.8203	116.141	74.0769	111.744	UP
Gm7367	74.8987	-0.611093	0.654701	0.197586	-3.09279	0.00198285	0.0191766	84.5073	96.1794	96.3076	85.7739	47.1306	59.612	69.6676	60.0109	DOWN
Gm8170	22.5067	0.836578	1.78581	0.359551	2.32673	0.0199796	0.0989341	23.1389	15.5441	12.4268	13.6873	29.5936	23.6392	36.1566	25.8668	UP
Gm8173	44.4003	2.65808	6.31194	0.397839	6.68131	2.36816e-11	4.64187e-09	24.1449	7.77207	11.3912	5.47493	89.8769	96.6125	42.3297	77.6003	UP
Gm9911	93.9228	-1.1885	0.43876	0.311428	-3.81628	0.000135477	0.00260832	126.761	83.5498	227.824	84.8614	47.1306	58.5842	80.25	42.4215	DOWN
Gm9930	25.9086	0.84902	1.80128	0.330289	2.57053	0.0101543	0.0620182	19.1147	16.5157	25.8891	12.7748	32.8818	31.8616	36.1566	32.0748	UP
Gna13	984.155	0.690276	1.61359	0.0859448	8.03162	9.61903e-16	3.95483e-13	675.052	725.717	832.594	778.353	1276.91	1245.68	1125.26	1213.67	UP
Gpatch4	516.092	0.704245	1.62929	0.108813	6.47207	9.66682e-11	1.67993e-08	416.5	367.231	353.128	432.519	644.483	734.872	594.379	585.624	UP
Gpn2	89.2953	0.725637	1.65363	0.202265	3.58755	0.000333794	0.00516418	62.3744	64.1196	60.0628	82.124	119.471	136.696	100.533	88.9817	UP
Gpr176	23.9579	-1.15284	0.44974	0.441483	-2.61128	0.00902036	0.0570354	11.0664	35.9458	50.7427	34.6746	13.1527	10.2779	20.283	15.5201	DOWN
Gpr63	70.3864	0.677109	1.59893	0.212507	3.18629	0.00144111	0.0153461	66.3986	56.3475	53.8494	40.1495	89.8769	88.3902	74.9588	93.1204	UP
Gpt	119.979	0.635696	1.55369	0.235499	2.69936	0.00694727	0.0475864	108.652	83.5498	49.7071	133.223	158.929	144.919	128.753	152.097	UP
Grcc10	67.1435	-0.638195	0.642516	0.256821	-2.48498	0.0129558	0.0733364	83.5013	65.0911	100.45	78.474	33.9779	75.0289	58.2033	42.4215	DOWN
Gria2	3350.53	-0.614842	0.653001	0.130672	-4.70524	2.53563e-06	0.000110447	3738.44	3367.25	5496.78	3614.37	2356.53	2767.85	2848.43	2614.61	DOWN
Grik4	37.0712	1.13774	2.20036	0.282373	4.02921	5.59651e-05	0.00133438	23.1389	17.4872	22.7824	29.1996	43.8424	59.612	52.9121	47.5949	UP
Grwd1	247.293	0.629769	1.54732	0.165051	3.8156	0.000135855	0.00260832	211.268	188.473	147.05	229.035	300.32	381.311	260.151	260.737	UP
Gsap	90.8101	-0.663442	0.63137	0.277075	-2.39445	0.0166454	0.087521	87.5254	87.4358	160.513	110.411	83.3006	51.3896	101.415	44.4908	DOWN
Gsg1l	126.444	-0.831172	0.562072	0.221509	-3.75232	0.000175202	0.00315029	150.906	119.496	231.967	145.998	88.7809	91.4736	114.643	68.2883	DOWN
Gsn	108.409	0.655514	1.57518	0.175546	3.73414	0.000188356	0.00331604	93.5617	83.5498	80.7741	78.474	160.025	121.28	111.997	137.611	UP
Gspt2	121.577	0.833888	1.78248	0.193875	4.30117	1.69901e-05	0.000508351	88.5315	97.1509	67.3117	95.8113	150.16	180.892	113.761	178.998	UP
Gstm7	90.3436	-0.641664	0.640973	0.221168	-2.90126	0.00371668	0.0300778	114.688	84.5213	151.193	90.3363	80.0124	56.5286	74.0769	71.3923	DOWN
Gucy1a1	124.892	-0.62715	0.647454	0.212768	-2.94757	0.0032028	0.0268739	108.652	161.271	197.793	139.611	89.8769	96.6125	128.753	76.5656	DOWN
Gucy1b2	51.04	-0.726342	0.604434	0.251834	-2.88421	0.00392392	0.0312007	71.4288	74.8062	55.9205	52.0118	42.7463	47.2785	29.9835	34.1441	DOWN
Gusb	99.5528	1.08393	2.1198	0.241466	4.48895	7.15741e-06	0.000251359	35.2114	89.3789	72.4896	58.3993	113.99	119.224	158.736	148.993	UP
H19	2349.95	0.626127	1.54342	0.214945	2.91296	0.00358024	0.0292545	1701.21	2447.23	1435.29	1807.64	3179.67	2096.7	3276.14	2855.69	UP
Has3	41.6548	0.781202	1.71856	0.297926	2.62213	0.00873816	0.0557318	31.1872	34.9743	18.6402	37.412	56.9951	69.8899	45.8571	38.2828	UP
Hdac5	987.269	-0.60092	0.659333	0.106422	-5.64656	1.63686e-08	1.54148e-06	1118.72	1070.6	1448.76	1123.27	738.745	733.844	857.176	807.043	DOWN
Heph	112.258	0.704238	1.62928	0.195456	3.60306	0.000314494	0.0049546	75.4529	73.8347	92.1653	100.374	144.68	130.53	175.492	105.536	UP
Hexb	71.5141	0.608686	1.52487	0.234337	2.59748	0.009391	0.0586746	55.3322	49.547	76.6318	45.6244	96.4533	81.1956	103.179	64.1496	UP
Hist2h2be	93.7359	-0.751514	0.59398	0.198327	-3.78927	0.000151093	0.00281744	105.634	131.154	112.877	121.361	61.3794	51.3896	86.4231	79.6696	DOWN
Hist3h2a	80.256	-0.973529	0.509259	0.226789	-4.29266	1.76543e-05	0.000522102	116.701	96.1794	114.948	98.5487	52.6109	40.0839	78.4862	44.4908	DOWN
Hlf	97.4783	0.690416	1.61375	0.206986	3.33557	0.000851233	0.0104055	75.4529	74.8062	85.9519	62.9617	113.99	115.113	160.5	91.051	UP
Hopx	53.0154	-0.986717	0.504625	0.292676	-3.37136	0.00074798	0.00942354	59.3563	46.6324	76.6318	99.4612	21.9212	40.0839	39.6841	40.3522	DOWN
Hpca	74.9322	-1.19365	0.437195	0.362274	-3.29489	0.000984593	0.011558	86.5194	64.1196	182.259	84.8614	49.3227	32.8894	76.7225	22.7628	DOWN
Hps6	30.5995	0.805715	1.74801	0.309574	2.60266	0.00925031	0.0580538	19.1147	24.2877	21.7469	23.7247	36.17	37.0005	29.9835	52.7682	UP
Hr	40.2436	-1.02301	0.492088	0.295768	-3.45884	0.000542511	0.00743504	41.2476	68.9772	63.1695	42.887	21.9212	23.6392	35.2747	24.8321	DOWN
Hrk	43.0963	-1.00216	0.499252	0.306966	-3.26472	0.00109571	0.0124884	48.2899	74.8062	47.636	59.3117	24.1133	16.4447	31.7472	42.4215	DOWN
Hs3st1	162.962	-1.00877	0.496971	0.181635	-5.5538	2.79523e-08	2.44141e-06	220.323	198.188	255.785	198.01	99.7415	100.724	148.154	82.7737	DOWN
Hsf5	20.1818	-0.993021	0.502425	0.371504	-2.67298	0.00751812	0.0500525	30.1812	31.0883	20.7113	25.5497	10.9606	17.4725	14.1099	11.3814	DOWN
Hspa12b	119.437	0.925578	1.89944	0.176225	5.25226	1.50247e-07	1.02126e-05	100.604	73.8347	73.5251	81.2115	179.754	169.586	133.162	143.819	UP
Htra1	74.0331	-1.2089	0.432598	0.301986	-4.00317	6.24991e-05	0.00144917	71.4288	85.4928	153.264	104.024	38.3621	26.7226	70.5494	42.4215	DOWN
Hyi	74.4235	0.625181	1.5424	0.23446	2.66647	0.00766527	0.0508514	49.2959	76.7492	45.5649	62.0492	83.3006	104.835	67.022	106.571	UP
Id2	342.257	-0.610033	0.655182	0.206065	-2.96039	0.0030725	0.0260792	382.295	306.997	634.801	331.233	237.845	219.948	340.401	284.534	DOWN
Ifngr1	87.4736	0.663344	1.58375	0.195878	3.38652	0.000707838	0.00901892	71.4288	78.6923	67.3117	53.8368	92.0691	96.6125	114.643	125.195	UP
Igdcc4	896.961	0.599689	1.51539	0.0867577	6.91223	4.77106e-12	1.04449e-09	763.584	678.114	707.291	703.529	1075.24	1218.96	1021.2	1007.77	UP
Igf2	266.018	0.650804	1.57004	0.178974	3.6363	0.000276581	0.00445728	154.93	248.706	200.9	223.56	361.7	230.226	397.722	310.401	UP
Igfbpl1	2092.86	-0.67341	0.627023	0.113681	-5.9237	3.14783e-09	3.71069e-07	2269.62	2315.11	3200.93	2506.61	1468.72	1511.88	1852.8	1617.19	DOWN
Ikbip	103.098	0.733665	1.66286	0.176862	4.14823	3.35052e-05	0.000878379	72.4348	68.9772	84.9163	83.0364	137.008	148.002	109.352	121.056	UP
Ikbke	28.7982	0.813632	1.75763	0.334287	2.43393	0.0149359	0.0810967	25.151	22.3447	19.6757	16.4248	50.4188	32.8894	39.6841	23.7974	UP
Ikzf1	36.3813	1.42775	2.69026	0.347478	4.10889	3.97572e-05	0.00101593	25.151	20.4017	9.32009	23.7247	39.4582	69.8899	37.9203	65.1843	UP
Il20rb	56.0918	1.07648	2.10888	0.258744	4.16039	3.1771e-05	0.000844739	22.1329	48.5755	32.1025	41.062	83.3006	81.1956	61.7308	78.635	UP
Il3ra	21.1005	1.17598	2.25946	0.390512	3.01138	0.00260067	0.0233189	21.1268	7.77207	8.28452	14.5998	29.5936	28.7782	31.7472	26.9014	UP
Il4i1	43.1024	1.11908	2.17209	0.280051	3.996	6.44219e-05	0.00148762	22.1329	31.0883	25.8891	29.1996	64.6675	64.7509	38.8022	68.2883	UP
Inka1	34.9157	1.15939	2.23363	0.307262	3.77329	0.000161106	0.00296157	20.1208	19.4302	16.569	30.1121	42.7463	37.0005	56.4395	56.9069	UP
Inka2	190.025	1.58438	2.99879	0.159593	9.92765	3.15593e-23	4.83632e-20	92.5556	110.752	76.6318	99.4612	287.168	329.921	231.931	291.777	UP
Inpp1	122.792	0.601105	1.51688	0.208439	2.88384	0.00392857	0.0312142	83.5013	95.2079	137.73	73.9116	175.37	154.169	115.525	146.923	UP
Insm1	668.666	-0.622415	0.649582	0.128746	-4.83445	1.33515e-06	6.41215e-05	797.789	821.897	999.32	625.055	466.922	525.202	550.286	562.861	DOWN
Ipcef1	36.8401	-0.811584	0.569756	0.33681	-2.40962	0.0159692	0.0850834	55.3322	38.8604	64.205	29.1996	31.7857	35.9727	17.6374	21.7281	DOWN
Iqub	27.7887	1.23934	2.3609	0.410896	3.01619	0.00255976	0.0230625	22.1329	9.71509	22.7824	11.8623	21.9212	26.7226	50.2665	56.9069	UP
Irf1	33.8157	0.943649	1.92339	0.343723	2.74538	0.00604417	0.0428398	36.2174	13.6011	21.7469	20.9872	52.6109	29.806	39.6841	55.8722	UP
Irx3	33.883	0.751543	1.68359	0.299336	2.5107	0.0120492	0.0697982	32.1933	19.4302	23.818	25.5497	43.8424	31.8616	40.5659	53.8029	UP
Isl1	22.8329	1.68482	3.215	0.629518	2.67637	0.0074425	0.049785	5.0302	19.4302	3.1067	15.5123	37.266	57.5564	4.40934	40.3522	UP
Islr	88.8338	0.745359	1.67639	0.297645	2.50419	0.0122733	0.070708	73.4409	83.5498	73.5251	35.587	115.086	59.612	162.264	107.606	UP
Itgb1bp2	95.5367	-0.665911	0.630291	0.217117	-3.06706	0.00216174	0.0204148	135.815	111.724	82.8452	138.698	53.7069	86.3346	83.7775	71.3923	DOWN
Itgb3	51.3431	0.745286	1.67631	0.278225	2.67872	0.00739044	0.0495329	46.2778	45.6609	34.1736	27.3747	89.8769	46.2507	65.2582	55.8722	UP
Itm2a	184.222	0.75714	1.69014	0.139873	5.41304	6.19641e-08	4.77008e-06	125.755	140.869	144.979	136.873	227.981	218.92	272.497	205.899	UP
Itpripl1	224.661	0.748119	1.6796	0.135992	5.50119	3.77228e-08	3.17947e-06	174.045	195.273	152.228	148.736	289.36	303.199	241.632	292.812	UP
Jade2	72.2187	1.36017	2.56715	0.207662	6.54991	5.75734e-11	1.05491e-08	38.2295	40.8034	34.1736	48.3619	99.7415	119.224	97.8873	99.3284	UP
Jakmip1	47.1954	-0.988028	0.504166	0.393111	-2.51335	0.011959	0.0695344	43.2597	60.2336	122.197	25.5497	25.2094	39.0561	29.9835	32.0748	DOWN
Kank2	313.802	0.742024	1.67252	0.129876	5.71332	1.10791e-08	1.11167e-06	213.28	300.196	202.971	222.647	398.966	377.2	403.014	392.14	UP
Kat14	515.459	0.609373	1.5256	0.0998212	6.10465	1.03027e-09	1.40059e-07	417.506	399.29	354.163	460.807	606.121	605.37	612.016	668.397	UP
Kbtbd8	182.517	0.61812	1.53487	0.137422	4.49798	6.86005e-06	0.000243966	161.972	126.296	136.695	150.561	225.788	227.142	195.775	235.905	UP
Kcnb1	216.839	0.601348	1.51713	0.130269	4.61619	3.90846e-06	0.000153221	180.081	157.385	200.9	151.473	246.614	279.56	254.86	263.841	UP
Kcng1	218.368	-0.786722	0.57966	0.197557	-3.98226	6.82632e-05	0.00155083	247.486	248.706	400.764	209.872	119.471	172.669	177.255	170.721	DOWN
Kcnh2	113.304	0.605406	1.52141	0.183013	3.30799	0.000939686	0.0111774	87.5254	75.7777	85.9519	109.499	162.217	148.002	116.407	121.056	UP
Kcnh3	59.5812	-0.995987	0.501393	0.305031	-3.2652	0.00109387	0.0124759	60.3624	68.0057	107.699	82.124	39.4582	31.8616	64.3764	22.7628	DOWN
Kcnh7	635.836	-0.890748	0.539334	0.144064	-6.18299	6.2899e-10	8.83574e-08	918.514	648.968	1030.39	708.091	417.599	436.812	523.83	402.487	DOWN
Kcnj11	69.1913	-0.973198	0.509376	0.316389	-3.07595	0.0020983	0.0200175	68.4107	68.0057	167.762	62.9617	38.3621	56.5286	51.1483	40.3522	DOWN
Kcnj14	22.3837	1.64103	3.11888	0.41998	3.90739	9.32989e-05	0.00198578	16.0966	10.6866	10.3557	6.38742	28.4976	45.2229	19.4011	42.4215	UP
Kcnn2	371.097	-0.87274	0.546109	0.179574	-4.86006	1.17348e-06	5.78403e-05	363.18	448.837	674.153	435.257	208.251	259.004	324.527	255.564	DOWN
Kcnn3	283.239	-0.743888	0.597128	0.313812	-2.37049	0.0177644	0.0915556	303.824	241.906	577.845	295.646	192.907	212.753	267.206	173.825	DOWN
Kcnq3	762.061	-1.23557	0.424675	0.343021	-3.60202	0.000315754	0.00496132	923.544	771.378	1854.7	729.991	432.944	388.506	560.868	434.562	DOWN
Kcnq4	37.4346	-1.11904	0.4604	0.316811	-3.5322	0.000412115	0.00607789	55.3322	34.9743	63.1695	52.0118	14.2488	31.8616	28.2198	19.6587	DOWN
Kcnt2	103.578	-0.59017	0.664264	0.220719	-2.67385	0.00749853	0.0500011	112.676	104.923	178.117	103.111	65.7636	83.2512	103.179	77.6003	DOWN
Khdrbs2	377.067	-0.947246	0.518621	0.286617	-3.30492	0.000950035	0.011278	414.488	397.347	721.789	453.507	204.963	247.698	367.739	209.003	DOWN
Kif21b	8040.09	-0.633114	0.644783	0.197709	-3.20225	0.0013636	0.0147347	9038.26	8411.33	13497.6	8159.47	5603.06	6653.93	6950.88	6006.26	DOWN
Kif26b	830.064	-0.742157	0.597845	0.0900668	-8.24007	1.72109e-16	8.34681e-14	1025.15	1009.4	1092.52	1031.11	549.126	645.454	701.085	586.658	DOWN
Kif27	96.4302	0.656752	1.57653	0.233515	2.81247	0.00491632	0.037014	89.5375	44.6894	77.6674	87.5989	131.527	83.2512	134.044	123.126	UP
Kirrel3	175.528	-0.84256	0.557653	0.249677	-3.3746	0.000739231	0.00934826	177.063	173.9	379.017	172.46	101.934	121.28	165.791	112.779	DOWN
Klf15	61.36	0.742684	1.67329	0.242293	3.06522	0.00217507	0.0204632	27.1631	53.433	51.7783	51.0993	66.8597	85.3068	71.4313	83.8083	UP
Klhl21	61.0998	0.846767	1.79847	0.241752	3.50262	0.0004607	0.00657024	25.151	51.49	48.6716	49.2744	73.436	86.3346	82.0137	72.427	UP
L1cam	1309.02	-0.711391	0.610731	0.13693	-5.19528	2.04409e-07	1.33132e-05	1548.29	1388.29	2189.18	1376.94	927.267	1086.38	1073.23	882.574	DOWN
Lama5	390.897	0.844647	1.79582	0.122266	6.9083	4.90502e-12	1.06005e-09	237.425	304.082	282.709	293.821	440.616	570.425	455.926	542.167	UP
Laptm4b	157.423	0.638234	1.55642	0.167971	3.79967	0.000144887	0.00272281	158.954	105.895	105.628	122.273	186.33	163.419	197.538	219.35	UP
Laptm5	71.8905	0.593291	1.50868	0.215107	2.75812	0.00581342	0.0417633	56.3382	47.604	67.3117	58.3993	87.6848	65.7787	104.06	87.947	UP
Larp6	28.0477	0.93595	1.91315	0.346027	2.70485	0.00683359	0.0469589	29.1751	19.4302	17.6046	10.9499	42.7463	41.1117	34.3928	28.9708	UP
Lat2	49.6913	-1.01854	0.493616	0.311147	-3.2735	0.00106226	0.012196	96.5798	40.8034	54.885	73.9116	26.3054	47.2785	30.8654	26.9014	DOWN
Lcmt2	153.18	0.817423	1.76225	0.194028	4.21291	2.52099e-05	0.000698954	127.767	65.0911	130.481	120.448	188.522	222.003	186.956	184.171	UP
Lemd1	85.333	0.821442	1.76717	0.218125	3.76592	0.000165934	0.00302729	65.3926	70.9202	70.4184	40.1495	115.086	129.502	90.8324	100.363	UP
Lgi2	66.3079	0.994154	1.99191	0.230335	4.31611	1.58801e-05	0.000479734	46.2778	54.4045	34.1736	41.9745	108.51	88.3902	68.7857	87.947	UP
Limch1	1433.8	-0.693674	0.618277	0.138856	-4.99562	5.86482e-07	3.25208e-05	1622.74	1527.21	2347.63	1592.29	928.363	1038.07	1324.57	1089.51	DOWN
Lipt1	38.7436	0.760093	1.6936	0.262342	2.89733	0.00376349	0.0303256	30.1812	31.0883	32.1025	21.8997	50.4188	47.2785	49.3846	47.5949	UP
Lmo1	193.013	-0.962123	0.513301	0.198711	-4.84182	1.28656e-06	6.25001e-05	221.329	230.248	348.985	220.822	87.6848	154.169	152.563	128.299	DOWN
Lmo7	154.743	-0.602851	0.658451	0.255075	-2.36342	0.0181069	0.0927463	186.117	121.439	312.741	126.836	119.471	113.057	145.508	112.779	DOWN
Lox	146.68	0.680823	1.60305	0.24781	2.74736	0.00600778	0.0426593	87.5254	174.872	88.023	100.374	207.155	111.002	221.349	183.137	UP
Loxl2	115.95	0.807574	1.75027	0.256024	3.1543	0.00160886	0.0166691	81.4892	93.2649	40.387	121.361	145.776	148.002	117.288	180.033	UP
Lppos	33.8697	0.763978	1.69817	0.304141	2.51192	0.0120078	0.0696062	20.1208	26.2308	23.818	30.1121	31.7857	41.1117	38.8022	58.9762	UP
Lrfn2	30.9771	0.853195	1.8065	0.305845	2.78963	0.00527684	0.0390139	26.157	15.5441	25.8891	20.9872	31.7857	44.1951	44.9753	38.2828	UP
Lrfn3	166.336	0.603932	1.51985	0.139778	4.32064	1.5558e-05	0.000471692	113.682	130.182	132.552	151.473	203.867	193.225	214.294	191.414	UP
Lrfn5	383.136	-0.629528	0.646388	0.162277	-3.87933	0.000104745	0.00218797	420.524	446.894	628.588	366.82	250.998	345.338	330.7	275.222	DOWN
Lrrc17	42.9876	0.754843	1.68745	0.267858	2.81807	0.00483137	0.0365541	31.1872	30.1168	31.067	35.587	66.8597	43.1673	63.4945	42.4215	UP
Lrrc55	58.3124	-0.759568	0.590673	0.244486	-3.10679	0.00189129	0.0185272	83.5013	56.3475	94.2364	59.3117	49.3227	43.1673	42.3297	38.2828	DOWN
Lrrfip1	421.441	0.824277	1.77065	0.104068	7.92055	2.36455e-15	9.06425e-13	315.896	263.279	321.025	316.633	514.052	592.009	510.602	538.029	UP
Lrrn2	260.342	0.694358	1.61816	0.173286	4.00699	6.14966e-05	0.0014358	165.996	177.786	292.029	160.598	298.128	318.616	339.519	330.06	UP
Lsm10	59.0087	1.02534	2.03545	0.222155	4.61545	3.92241e-06	0.000153411	43.2597	35.9458	34.1736	41.9745	81.1085	67.8343	76.7225	91.051	UP
Lurap1	71.7128	1.1845	2.27285	0.225608	5.25026	1.51885e-07	1.02615e-05	52.314	36.9174	37.2803	48.3619	111.798	91.4736	77.6044	117.952	UP
Lurap1l	33.4622	0.809786	1.75295	0.323456	2.50354	0.0122958	0.0707892	26.157	29.1453	22.7824	19.1623	28.4976	52.4174	32.6291	56.9069	UP
Luzp2	97.3682	-0.665551	0.630448	0.213046	-3.12398	0.00178425	0.0179244	102.616	115.61	152.228	107.674	75.6282	50.3618	83.7775	91.051	DOWN
Lypd6	114.797	-0.844562	0.55688	0.220147	-3.83635	0.000124875	0.00247358	142.858	127.268	196.757	124.098	77.8203	68.8621	115.525	65.1843	DOWN
Mad2l1bp	62.9567	0.89306	1.85711	0.234412	3.80979	0.000139085	0.0026535	45.2718	27.2023	50.7427	52.9243	90.973	83.2512	76.7225	76.5656	UP
Maf	310.614	0.663547	1.58397	0.169116	3.92363	8.72264e-05	0.00189288	194.166	237.048	324.132	207.135	404.446	293.949	445.343	378.69	UP
Mafa	38.4756	1.60086	3.03323	0.382323	4.18718	2.8244e-05	0.000767917	29.1751	8.74358	14.4979	23.7247	50.4188	79.14	31.7472	70.3576	UP
Magef1	30.6618	-0.762755	0.58937	0.31011	-2.45963	0.0139081	0.0771216	33.1993	46.6324	45.5649	29.1996	19.7291	19.5281	25.5742	25.8668	DOWN
Malt1	77.1622	0.598059	1.51368	0.224606	2.6627	0.00775164	0.0512228	50.302	68.0057	43.4937	83.0364	106.318	92.5013	84.6593	88.9817	UP
Manba	37.738	0.955616	1.93941	0.272935	3.50126	0.000463064	0.00659837	28.1691	20.4017	25.8891	28.2871	48.2266	41.1117	52.9121	56.9069	UP
Map3k20	384.512	0.923868	1.89719	0.11047	8.36304	6.11215e-17	3.28787e-14	280.685	262.308	252.678	265.534	473.498	550.897	440.052	550.445	UP
Mapk12	115.486	0.777241	1.71385	0.240052	3.2378	0.00120455	0.0133938	105.634	91.3219	43.4937	99.4612	133.719	183.975	117.288	148.993	UP
Mapkapk3	33.9025	1.57572	2.98085	0.37055	4.25238	2.11509e-05	0.000608473	10.0604	28.1738	11.3912	18.2498	43.8424	76.0567	37.9203	45.5255	UP
Mavs	133.423	0.681836	1.60418	0.158751	4.29499	1.74703e-05	0.00051848	121.731	102.98	99.4143	85.7739	178.658	171.641	149.918	157.27	UP
Mdfi	47.6172	0.90191	1.86854	0.296331	3.04359	0.00233772	0.0215929	48.2899	30.1168	19.6757	34.6746	56.9951	45.2229	65.2582	80.7043	UP
Med18	104.969	0.932064	1.908	0.237213	3.92923	8.52197e-05	0.00186807	65.3926	74.8062	44.5293	103.111	155.641	158.28	101.415	136.577	UP
Med7	227.193	1.023	2.03214	0.149298	6.85209	7.27801e-12	1.51464e-09	149.9	155.441	135.659	157.86	263.054	356.644	251.332	347.649	UP
Mertk	55.41	0.630466	1.54806	0.241542	2.61017	0.00904983	0.0571733	37.2235	47.604	42.4582	46.5369	51.5148	71.9455	59.0852	86.9123	UP
Metrn	251.753	1.19476	2.28906	0.192182	6.2168	5.07409e-10	7.24864e-08	161.972	185.558	101.485	162.423	375.949	401.867	239.868	384.898	UP
Mettl26	101.283	0.634727	1.55264	0.168603	3.76461	0.000166807	0.00303657	87.5254	72.8632	74.5607	82.124	132.623	117.168	111.997	131.403	UP
Mfsd5	117.485	0.789263	1.72819	0.168718	4.678	2.89689e-06	0.000122082	72.4348	92.2934	90.0942	89.4239	169.889	155.197	146.39	124.16	UP
Mgll	43.9272	-1.10003	0.466506	0.349518	-3.14729	0.00164794	0.0170008	45.2718	36.9174	100.45	57.4868	21.9212	19.5281	38.8022	31.0401	DOWN
Mical2	68.5792	-0.946264	0.518975	0.347375	-2.72404	0.00644878	0.0449018	78.4711	49.547	162.584	71.1741	48.2266	30.8338	70.5494	37.2481	DOWN
Mid2	56.4911	0.728289	1.65667	0.236342	3.0815	0.00205959	0.0197316	46.2778	34.9743	39.3515	49.2744	74.5321	55.5008	66.1401	85.8777	UP
Minpp1	125.593	0.665627	1.58626	0.157313	4.23122	2.32423e-05	0.000655178	87.5254	97.1509	97.3431	105.849	176.466	157.252	139.335	143.819	UP
Mir3093	150.834	-0.849017	0.555163	0.165583	-5.12745	2.93693e-07	1.79376e-05	244.468	171.957	172.939	187.06	107.414	93.5291	121.698	107.606	DOWN
Mis12	644.932	0.647781	1.56676	0.124976	5.18326	2.18039e-07	1.39752e-05	517.104	587.763	399.728	504.606	751.897	921.93	686.975	789.454	UP
Mmp2	118.436	0.904501	1.8719	0.270777	3.34039	0.000836602	0.0102672	54.3261	117.553	60.0628	97.6363	211.54	104.835	182.547	118.987	UP
Mmrn1	117.31	0.751719	1.6838	0.221511	3.3936	0.000689799	0.00887278	84.5073	99.094	60.0628	105.849	164.409	100.724	185.192	138.646	UP
Mob3b	193.973	0.623342	1.54044	0.208916	2.9837	0.00284786	0.0247839	149.9	191.387	103.557	165.16	224.692	278.532	156.091	282.465	UP
Mob3c	34.6471	0.928655	1.9035	0.331529	2.80112	0.00509249	0.0380009	21.1268	29.1453	30.0314	15.5123	52.6109	34.945	61.7308	32.0748	UP
Mpeg1	34.9143	1.15493	2.22674	0.311725	3.70497	0.00021142	0.00361181	22.1329	21.3732	26.9247	16.4248	47.1306	59.612	54.6758	31.0401	UP
Mrc1	206.45	0.736177	1.66576	0.214287	3.43547	0.000591529	0.00795802	169.015	181.672	149.121	120.448	270.727	158.28	363.33	239.009	UP
Mrm2	76.9802	0.695628	1.61959	0.195991	3.54929	0.000386274	0.00577253	61.3684	56.3475	69.3829	48.3619	87.6848	93.5291	92.5961	106.571	UP
Mrm3	82.4988	0.804206	1.74618	0.204886	3.92515	8.6677e-05	0.00188916	63.3805	48.5755	53.8494	73.9116	118.374	115.113	86.4231	100.363	UP
Mrpl14	77.6858	0.887871	1.85044	0.233764	3.79815	0.000145778	0.00273649	40.2416	54.4045	42.4582	80.299	94.2612	117.168	94.3599	98.2937	UP
Mrpl16	194.778	0.749649	1.68138	0.132246	5.6686	1.43971e-08	1.38267e-06	139.839	157.385	143.944	139.611	247.71	277.504	220.467	231.766	UP
Mrpl43	355.546	1.17967	2.26525	0.130477	9.04117	1.55008e-19	1.30648e-16	258.552	197.216	216.433	198.922	494.323	579.675	423.297	475.949	UP
Mrpl46	200.59	0.787137	1.72565	0.140761	5.59201	2.24462e-08	2.00199e-06	132.797	174.872	140.837	139.611	266.343	262.087	216.058	272.118	UP
Mrps2	365.321	0.911508	1.88101	0.107035	8.51596	1.65218e-17	1.01555e-14	285.715	232.191	261.998	235.422	466.922	496.424	500.019	443.874	UP
Mrps34	205.677	0.725341	1.65329	0.14257	5.08761	3.626e-07	2.14468e-05	178.069	158.356	138.766	145.086	220.308	253.865	247.805	303.159	UP
Msh5	62.1268	-0.637733	0.642722	0.223886	-2.84847	0.00439294	0.034106	66.3986	80.6353	71.454	83.9489	58.0912	34.945	52.9121	48.6295	DOWN
Mt1	149.889	1.04709	2.06636	0.236416	4.42904	9.46545e-06	0.000319915	51.308	105.895	107.699	125.923	142.488	220.975	197.538	247.286	UP
Mt2	95.094	1.30931	2.47823	0.224349	5.83604	5.34548e-09	6.00725e-07	55.3322	47.604	60.0628	55.6618	107.414	134.641	107.588	192.449	UP
mt-Tm	33.6152	0.887916	1.8505	0.36343	2.44315	0.0145595	0.0796851	24.1449	15.5441	41.4226	13.6873	29.5936	52.4174	47.6209	44.4908	UP
mt-Tp	116.86	0.980339	1.97293	0.18621	5.2647	1.40422e-07	9.66158e-06	82.4952	62.1766	103.557	66.6117	155.641	151.086	138.453	174.859	UP
mt-Tv	157.578	0.79946	1.74045	0.244068	3.27556	0.00105452	0.0121256	128.773	80.6353	181.224	70.2616	160.025	211.725	223.113	204.865	UP
Mybpc1	77.0057	1.44209	2.71713	0.249443	5.78123	7.41555e-09	7.91165e-07	42.2536	23.3162	64.205	36.4995	104.126	108.946	120.816	115.883	UP
Myof	88.1523	0.63049	1.54809	0.233768	2.69708	0.00699513	0.0478171	76.459	55.376	78.7029	66.6117	116.182	63.7231	132.28	115.883	UP
Nab2	81.5432	0.801237	1.74259	0.219239	3.65462	0.000257562	0.0042071	72.4348	74.8062	39.3515	51.0993	111.798	93.5291	99.6511	109.675	UP
Nanos1	82.1849	0.64945	1.56857	0.224736	2.88984	0.00385438	0.030853	45.2718	87.4358	59.0272	63.8742	92.0691	107.918	82.8956	118.987	UP
Nav3	736.206	-0.903442	0.53461	0.377113	-2.39568	0.0165895	0.0873906	750.505	687.829	1788.42	611.367	527.205	455.312	566.159	502.85	DOWN
Nbeal2	107.991	0.651891	1.57123	0.197073	3.30786	0.000940118	0.0111774	88.5315	80.6353	68.3473	97.6363	141.392	144.919	93.478	148.993	UP
Nceh1	36.909	0.8558	1.80976	0.272119	3.14494	0.00166118	0.017106	26.157	26.2308	31.067	21.8997	39.4582	48.3063	49.3846	52.7682	UP
Nck1	417.575	0.696649	1.62074	0.1281	5.43833	5.37826e-08	4.21681e-06	328.975	336.142	242.322	365.908	558.991	550.897	470.036	487.33	UP
Nckap1l	25.2588	1.04971	2.07011	0.355094	2.95614	0.00311518	0.026375	21.1268	14.5726	17.6046	12.7748	36.17	21.5836	44.0934	34.1441	UP
Ndufaf1	104.51	0.617888	1.53463	0.191708	3.22307	0.00126824	0.0139093	95.5737	70.9202	95.272	68.4366	107.414	152.113	112.879	133.473	UP
Ndufaf4	277.663	0.695661	1.61963	0.120356	5.78002	7.46921e-09	7.91877e-07	215.292	193.33	195.722	242.722	333.202	374.117	313.063	353.857	UP
Ndufb3	91.2294	-0.651821	0.636476	0.199866	-3.2613	0.00110903	0.0125892	104.628	119.496	95.272	126.836	76.7242	66.8065	87.3049	52.7682	DOWN
Necab2	85.0357	0.993172	1.99056	0.213971	4.64163	3.45677e-06	0.000140554	62.3744	62.1766	59.0272	43.7994	122.759	136.696	83.7775	109.675	UP
Nectin1	748.115	0.63892	1.55716	0.125254	5.10098	3.3789e-07	2.01266e-05	592.557	676.17	469.111	601.33	905.346	1007.24	739.887	993.284	UP
Nefm	324.734	-0.65402	0.635507	0.128705	-5.08155	3.74368e-07	2.19886e-05	332.999	394.433	467.04	395.107	238.941	238.448	291.898	239.009	DOWN
Neurod1	618.435	-0.622907	0.649361	0.133915	-4.65151	3.29514e-06	0.000136142	735.415	645.082	917.511	703.529	398.966	496.424	589.088	461.463	DOWN
Neurog1	92.3449	-0.710689	0.611028	0.204304	-3.47859	0.000504067	0.00706322	124.749	124.353	84.9163	125.011	55.8991	76.0567	84.6593	63.1149	DOWN
Nexn	43.8688	1.57574	2.98089	0.29707	5.30428	1.13118e-07	8.01187e-06	16.0966	21.3732	17.6046	32.8496	52.6109	76.0567	78.4862	55.8722	UP
Nfe2l2	231.285	0.819659	1.76499	0.139595	5.87169	4.31376e-09	4.91331e-07	159.96	145.726	149.121	213.522	299.224	281.615	292.78	308.332	UP
Nfe2l3	55.0066	-1.13318	0.455909	0.393438	-2.88021	0.00397412	0.0315404	52.314	49.547	155.335	45.6244	30.6897	25.6948	52.9121	27.9361	DOWN
Nfix	8112.5	-0.674464	0.626565	0.264547	-2.5495	0.0107876	0.0647374	8837.05	7856.6	14654.3	8552.75	5466.05	5719.67	7991.49	5822.09	DOWN
Nfkb2	57.959	0.645936	1.56475	0.240636	2.68429	0.00726845	0.0490097	58.3503	37.8889	41.4226	42.887	80.0124	83.2512	54.6758	65.1843	UP
Nfkbiz	80.5376	0.78521	1.72334	0.220047	3.56838	0.000359196	0.00548457	55.3322	62.1766	74.5607	44.7119	116.182	119.224	93.478	78.635	UP
Nim1k	137.36	0.917771	1.88919	0.198455	4.62459	3.7534e-06	0.000148873	84.5073	106.866	108.734	80.299	140.296	218.92	141.981	217.281	UP
Nkain2	165.993	-0.673242	0.627096	0.195761	-3.43911	0.000583637	0.00790231	199.196	166.128	292.029	159.685	122.759	116.141	149.918	122.091	DOWN
Nos1	201.913	-1.69554	0.308739	0.619288	-2.73788	0.00618357	0.0436136	216.298	194.302	637.908	186.148	63.5715	77.0845	191.365	48.6295	DOWN
Npnt	103.383	0.633536	1.55136	0.245132	2.58447	0.00975294	0.0602795	69.4167	47.604	108.734	98.5487	131.527	89.418	141.099	140.715	UP
Npr3	135.944	0.757154	1.69015	0.233863	3.23759	0.00120543	0.0133949	122.737	86.4643	75.5963	119.536	161.121	101.751	213.412	206.934	UP
Nptx1	105.597	-1.25066	0.420256	0.319421	-3.9154	9.02543e-05	0.00193319	109.658	87.4358	284.78	113.149	62.4754	79.14	62.6126	45.5255	DOWN
Nr4a3	210.375	-2.04676	0.242026	0.582462	-3.51399	0.000441434	0.00639833	257.546	193.33	678.295	226.297	63.5715	46.2507	158.736	58.9762	DOWN
Nradd	52.5344	0.793989	1.73386	0.23101	3.43703	0.000588141	0.00792509	40.2416	30.1168	43.4937	40.1495	61.3794	64.7509	74.9588	65.1843	UP
Nrg1	564.034	-0.915349	0.530215	0.116868	-7.83235	4.78819e-15	1.71733e-12	677.064	711.145	906.119	655.167	393.486	416.256	401.25	351.788	DOWN
Nrp1	862.109	-0.924049	0.527028	0.256799	-3.59833	0.000320264	0.00500131	995.979	869.501	1651.73	1000.09	508.572	571.453	782.217	517.335	DOWN
Nsmce3	169.571	1.02924	2.04095	0.134471	7.65402	1.94786e-14	6.43824e-12	117.707	117.553	108.734	102.199	220.308	243.587	217.821	228.662	UP
Nxt1	220.306	1.178	2.26263	0.150001	7.8533	4.05229e-15	1.48499e-12	171.027	134.068	111.841	123.186	282.784	334.033	273.379	332.129	UP
Nyap2	164.244	-0.722503	0.606045	0.24238	-2.98087	0.00287427	0.0249493	167.003	173.9	336.559	141.436	95.3572	119.224	142.863	137.611	DOWN
Oaf	106.936	0.603231	1.51911	0.201422	2.99486	0.00274569	0.0240875	64.3865	100.065	66.2762	108.586	119.471	120.252	148.154	128.299	UP
Ocel1	63.7317	-1.1951	0.436756	0.290399	-4.11538	3.86536e-05	0.000991756	93.5617	62.1766	129.446	70.2616	41.6503	24.667	52.9121	35.1788	DOWN
Olfml2a	69.141	0.694633	1.61847	0.244764	2.83798	0.00454006	0.0348823	34.2053	68.9772	67.3117	41.062	85.4927	85.3068	95.2417	75.531	UP
Olfr1564	22.1146	1.67669	3.19693	0.446163	3.75801	0.000171268	0.00309439	6.03624	16.5157	10.3557	9.12488	27.4015	48.3063	16.7555	42.4215	UP
Opcml	137.513	-1.28833	0.409425	0.443558	-2.90453	0.00367802	0.0298653	170.021	137.954	363.483	109.499	65.7636	71.9455	117.288	64.1496	DOWN
Opn3	20.3328	2.06035	4.17086	0.437854	4.70555	2.53179e-06	0.000110447	8.04831	8.74358	7.24896	7.29991	40.5542	26.7226	18.5192	45.5255	UP
Orai3	60.3186	0.585455	1.50051	0.25007	2.34116	0.0192237	0.0964398	66.3986	56.3475	32.1025	38.3245	69.0518	72.9733	81.1318	66.2189	UP
Otx2	162.151	0.889826	1.85295	0.169227	5.25819	1.45481e-07	9.969e-06	139.839	85.4928	109.77	119.536	230.173	173.697	209.003	229.697	UP
P3h4	114.32	1.11807	2.17057	0.172666	6.47537	9.4577e-11	1.66071e-08	60.3624	88.4073	68.3473	71.1741	140.296	163.419	150.799	171.755	UP
Pabpc4l	65.4519	0.838496	1.78819	0.228542	3.66889	0.000243609	0.00404184	51.308	51.49	46.6004	38.3245	85.4927	72.9733	68.7857	108.64	UP
Pantr2	126.627	-1.00183	0.499365	0.221145	-4.53021	5.89265e-06	0.000215005	176.057	173.9	179.153	147.823	76.7242	72.9733	130.516	55.8722	DOWN
Paqr4	124.716	0.597015	1.51258	0.187126	3.19044	0.00142054	0.0152135	105.634	121.439	103.557	66.6117	169.889	145.947	136.69	147.958	UP
Parm1	94.1705	0.690643	1.614	0.230236	2.99972	0.00270226	0.0238367	48.2899	88.4073	68.3473	83.0364	109.606	82.2234	129.635	143.819	UP
Parp4	63.8867	0.594554	1.51001	0.212197	2.8019	0.00508026	0.0379264	50.302	38.8604	57.9916	56.5743	78.9163	72.9733	82.0137	73.4616	UP
Parp8	170.518	0.675038	1.59664	0.143561	4.7021	2.57498e-06	0.000111299	126.761	134.068	140.837	123.186	238.941	212.753	175.492	212.108	UP
Pcdh20	35.3058	-0.851005	0.554398	0.357566	-2.37999	0.017313	0.0900478	46.2778	27.2023	62.1339	46.5369	25.2094	12.3335	37.9203	24.8321	DOWN
Pcdha7	46.2295	0.925157	1.89889	0.263814	3.50686	0.000453429	0.00650506	43.2597	33.0313	23.818	27.3747	67.9557	67.8343	53.7939	52.7682	UP
Pcdhb11	27.6139	1.42569	2.68643	0.339011	4.20543	2.60587e-05	0.000715566	10.0604	15.5441	19.6757	14.5998	38.3621	42.1395	30.8654	49.6642	UP
Pcdhb14	40.7781	1.26518	2.40358	0.382201	3.31026	0.000932101	0.0111199	22.1329	17.4872	45.5649	10.9499	53.7069	72.9733	36.1566	67.2536	UP
Pcdhb16	42.0712	0.838935	1.78873	0.313686	2.67445	0.0074853	0.0499441	34.2053	19.4302	46.6004	20.9872	52.6109	53.4452	67.9038	41.3868	UP
Pcdhb17	62.7046	0.740706	1.67099	0.232182	3.1902	0.00142176	0.0152169	41.2476	53.433	57.9916	35.587	72.34	64.7509	87.3049	88.9817	UP
Pcdhb18	40.8427	1.2588	2.39297	0.346561	3.63228	0.000280929	0.00450582	23.1389	13.6011	42.4582	17.3373	74.5321	42.1395	49.3846	64.1496	UP
Pcdhb19	95.3203	0.869149	1.82659	0.238365	3.6463	0.000266045	0.00431223	58.3503	59.2621	104.592	48.3619	106.318	135.669	145.508	104.502	UP
Pcdhb20	54.7774	1.06389	2.09056	0.279085	3.81206	0.000137811	0.00264286	33.1993	20.4017	50.7427	37.412	92.0691	63.7231	59.967	80.7043	UP
Pcdhb21	40.9202	0.97336	1.96341	0.323123	3.01235	0.00259233	0.0232689	23.1389	35.9458	37.2803	14.5998	37.266	54.473	68.7857	55.8722	UP
Pcdhb22	74.9906	1.58381	2.9976	0.244484	6.47817	9.28429e-11	1.64742e-08	34.2053	20.4017	50.7427	44.7119	110.702	125.391	97.8873	115.883	UP
Pcdhb6	22.0771	1.13352	2.19394	0.420327	2.69677	0.00700162	0.0478226	12.0725	7.77207	22.7824	12.7748	24.1133	48.3063	22.9286	25.8668	UP
Pcdhb7	36.8887	1.33147	2.51658	0.392726	3.39032	0.000698119	0.00893785	8.04831	17.4872	39.3515	19.1623	41.6503	50.3618	41.4478	77.6003	UP
Pcdhb8	30.1181	1.71651	3.2864	0.331709	5.17474	2.28223e-07	1.45175e-05	15.0906	12.6296	18.6402	10.0374	49.3227	56.5286	41.4478	37.2481	UP
Pck2	175.191	0.891382	1.85495	0.157898	5.6453	1.64897e-08	1.54426e-06	118.713	116.581	128.41	126.836	219.212	209.67	191.365	290.742	UP
Pcsk2	57.6576	-1.22404	0.428082	0.228444	-5.35816	8.40721e-08	6.29868e-06	79.4771	89.3789	85.9519	68.4366	32.8818	28.7782	37.0385	39.3175	DOWN
Pde1b	753.232	-0.959821	0.514121	0.109684	-8.75078	2.11876e-18	1.42864e-15	1001.01	910.304	1020.03	1050.27	507.476	467.646	625.244	443.874	DOWN
Pdgfa	73.9877	0.856074	1.81011	0.234544	3.64995	0.000262293	0.00427196	42.2536	65.0911	36.2448	66.6117	95.3572	109.974	98.7692	77.6003	UP
Pdpn	284.727	0.642196	1.5607	0.126254	5.08655	3.64629e-07	2.14914e-05	205.232	189.444	251.642	242.722	351.835	373.089	306.89	356.961	UP
Penk	28.4036	0.850093	1.80262	0.341208	2.49142	0.0127235	0.072386	21.1268	28.1738	12.4268	19.1623	49.3227	27.7504	36.1566	33.1095	UP
Perm1	60.2341	1.96176	3.89537	0.281007	6.98118	2.9272e-12	6.57917e-10	22.1329	24.2877	18.6402	32.8496	99.7415	126.419	62.6126	95.1897	UP
Pex26	143.619	0.713458	1.63973	0.145617	4.89955	9.6055e-07	5.01033e-05	120.725	113.667	91.1297	109.499	178.658	173.697	176.374	185.206	UP
Pgm1	206.051	0.794348	1.73429	0.126275	6.29063	3.16173e-10	4.75869e-08	152.918	165.157	143.944	140.523	265.247	280.587	237.222	262.806	UP
Pgp	269.956	0.701017	1.62565	0.184375	3.80213	0.00014346	0.00270504	208.25	202.074	141.872	269.184	328.818	353.561	251.332	404.556	UP
Phactr1	592.235	-0.770888	0.586057	0.283803	-2.71628	0.00660196	0.0457466	629.781	598.45	1197.11	562.093	506.38	409.062	465.626	369.377	DOWN
Phax	566.091	0.768716	1.70375	0.0919548	8.35971	6.28712e-17	3.28787e-14	428.573	397.347	385.23	462.632	709.151	753.372	670.22	722.2	UP
Phf24	112.696	-0.633103	0.644788	0.272624	-2.32226	0.020219	0.0995709	136.821	77.7207	229.895	104.024	100.838	82.2234	93.478	76.5656	DOWN
Phlda3	80.2391	1.71308	3.2786	0.241326	7.09861	1.26015e-12	2.95033e-10	32.1933	44.6894	27.9603	44.7119	109.606	168.558	101.415	112.779	UP
Pianp	142.055	-1.07402	0.474994	0.259349	-4.14121	3.45472e-05	0.000900097	201.208	107.838	207.113	254.584	112.894	67.8343	120.816	64.1496	DOWN
Pik3ap1	30.5667	1.03307	2.04637	0.38733	2.66716	0.00764958	0.0507673	6.03624	30.1168	25.8891	18.2498	35.0739	33.9172	41.4478	53.8029	UP
Plcb1	884.092	-1.06616	0.477589	0.234754	-4.54161	5.58275e-06	0.000205029	1061.37	1009.4	1661.05	1055.75	526.109	502.591	768.107	488.365	DOWN
Plcg2	28.6352	0.993662	1.99123	0.316688	3.13767	0.00170296	0.0174086	19.1147	19.4302	18.6402	19.1623	50.4188	37.0005	29.1016	36.2135	UP
Plec	1453.18	0.720482	1.64773	0.0846276	8.51355	1.68686e-17	1.01555e-14	1029.18	1222.16	985.858	1152.47	1912.62	1697.91	1852.8	1772.39	UP
Plekha2	32.9939	1.00496	2.00689	0.323289	3.10856	0.00188001	0.0184789	17.1027	22.3447	34.1736	14.5998	39.4582	44.1951	53.7939	38.2828	UP
Plpp2	36.4401	1.02175	2.03038	0.313803	3.25601	0.00112989	0.0127658	32.1933	26.2308	17.6046	20.0747	46.0345	42.1395	37.9203	69.3229	UP
Plpp6	52.7225	-0.771877	0.585655	0.237961	-3.24371	0.00117984	0.0131887	65.3926	67.0341	75.5963	58.3993	37.266	28.7782	45.8571	43.4562	DOWN
Plppr1	329.34	-0.917889	0.529283	0.16092	-5.704	1.17026e-08	1.16308e-06	405.434	370.145	587.165	361.345	212.636	208.642	268.97	220.385	DOWN
Pltp	133.375	0.670307	1.59141	0.222554	3.01188	0.00259634	0.0232924	90.5435	126.296	119.09	76.649	146.872	118.196	231.049	158.305	UP
Plxdc2	235.081	0.649011	1.56809	0.133188	4.87288	1.09983e-06	5.50143e-05	167.003	183.615	190.544	191.623	261.958	244.615	323.646	317.644	UP
Plxna2	6302.88	-0.681862	0.62336	0.114813	-5.93892	2.86908e-09	3.45458e-07	7552.34	7094.93	9819.23	6596.38	4395.2	5009.46	5452.59	4502.89	DOWN
Pm20d2	42.8406	-1.13747	0.454557	0.304783	-3.73205	0.000189925	0.00333549	63.3805	45.6609	65.2406	61.1367	30.6897	40.0839	22.0467	14.4854	DOWN
Pop7	84.5934	1.07783	2.11085	0.233698	4.61204	3.98733e-06	0.00015523	60.3624	36.9174	80.7741	40.1495	108.51	117.168	119.052	113.814	UP
Ppfia2	562.391	-0.614945	0.652955	0.161496	-3.8078	0.000140211	0.00266645	638.835	598.45	958.933	526.506	431.848	498.479	467.39	378.69	DOWN
Pramef8	200.024	0.778127	1.7149	0.132313	5.88094	4.07943e-09	4.74254e-07	151.912	122.41	153.264	161.51	272.919	254.893	244.277	239.009	UP
Prcp	187.205	0.725254	1.65319	0.157517	4.60431	4.13844e-06	0.000159273	131.791	147.669	125.303	158.773	227.981	281.615	183.429	241.078	UP
Prelp	88.771	0.759444	1.69284	0.214436	3.54159	0.000397718	0.00589768	72.4348	47.604	67.3117	76.649	94.2612	90.4458	133.162	128.299	UP
Prob1	62.0886	-0.624336	0.648718	0.220051	-2.83723	0.0045507	0.0349481	62.3744	69.9487	82.8452	85.7739	50.4188	44.1951	43.2115	57.9416	DOWN
Prox2os	59.2128	-0.710144	0.611259	0.226743	-3.13194	0.00173658	0.0176394	82.4952	64.1196	67.3117	80.299	41.6503	34.945	51.1483	51.7335	DOWN
Prr5	52.6684	0.773539	1.70946	0.307837	2.51282	0.011977	0.0695344	27.1631	38.8604	46.6004	42.887	35.0739	80.1678	56.4395	94.155	UP
Prr7	190.804	0.610592	1.52689	0.152503	4.00381	6.23298e-05	0.00144724	141.852	159.328	148.086	154.211	209.347	268.254	182.547	262.806	UP
Prrt3	30.1352	0.825333	1.77194	0.334839	2.46486	0.0137066	0.0762801	21.1268	19.4302	12.4268	33.7621	38.3621	35.9727	45.8571	34.1441	UP
Prrx1	389.222	0.607351	1.52346	0.176676	3.43766	0.000586772	0.0079193	322.939	413.863	198.829	297.471	505.284	493.341	379.203	502.85	UP
Prss23	69.7168	0.960727	1.94629	0.204071	4.7078	2.50406e-06	0.000109639	46.2778	41.7749	51.7783	49.2744	97.5494	87.3624	80.25	103.467	UP
Prtg	129.937	0.934744	1.91155	0.147625	6.33189	2.4217e-10	3.88787e-08	90.5435	87.4358	82.8452	95.8113	176.466	170.614	164.027	171.755	UP
Ptgis	31.3428	0.815521	1.75993	0.335675	2.42949	0.0151199	0.0817434	11.0664	31.0883	23.818	24.6372	41.6503	49.3341	30.8654	38.2828	UP
Pth1r	87.7806	1.14167	2.20637	0.198786	5.74322	9.28912e-09	9.49011e-07	66.3986	52.4615	42.4582	57.4868	122.759	140.808	116.407	103.467	UP
Ptpn14	235.458	0.642796	1.56135	0.166731	3.85529	0.000115592	0.00235047	185.111	218.59	162.584	169.723	298.128	227.142	373.03	249.356	UP
Ptpn6	22.9505	0.872872	1.8313	0.368193	2.37069	0.0177549	0.0915553	14.0845	19.4302	19.6757	11.8623	19.7291	26.7226	31.7472	40.3522	UP
Pus1	261.214	0.697148	1.6213	0.127679	5.46017	4.75674e-08	3.80021e-06	170.021	221.504	189.508	215.347	309.089	355.616	289.253	339.372	UP
Pvt1	45.6609	0.812631	1.75641	0.288133	2.82033	0.0047974	0.0363623	28.1691	37.8889	17.6046	48.3619	60.2833	56.5286	56.4395	60.0109	UP
Rab3c	597.764	-0.705233	0.613343	0.282098	-2.49995	0.0124209	0.0713388	683.101	541.131	1190.9	549.318	468.018	445.034	493.846	410.764	DOWN
Rad9b	73.4521	-0.733719	0.601352	0.218576	-3.35682	0.000788449	0.00982327	112.676	73.8347	97.3431	83.0364	61.3794	43.1673	52.0302	64.1496	DOWN
Rara	181.827	0.621457	1.53843	0.144263	4.30782	1.64875e-05	0.000495419	128.773	160.299	147.05	136.873	246.614	180.892	227.522	226.593	UP
Rasgrf1	41.489	-0.986461	0.504714	0.422918	-2.33251	0.019674	0.0978589	42.2536	23.3162	115.983	39.237	19.7291	37.0005	26.456	27.9361	DOWN
Rasl11a	59.0324	0.872293	1.83057	0.238354	3.65966	0.000252555	0.00413835	45.2718	44.6894	27.9603	48.3619	87.6848	83.2512	62.6126	72.427	UP
Rbfox1	279.289	-1.21668	0.430271	0.386966	-3.14416	0.00166566	0.0171417	321.933	283.681	725.931	230.86	167.697	167.53	188.72	147.958	DOWN
Rbm15	1873.86	0.658546	1.57849	0.11154	5.9041	3.54579e-09	4.15079e-07	1529.18	1552.47	1162.94	1567.65	2288.57	2563.32	1918.06	2408.71	UP
Rbm20	229.894	-0.621287	0.650091	0.13788	-4.50599	6.60656e-06	0.000235946	286.721	277.852	230.931	319.371	164.409	165.475	201.948	192.449	DOWN
Rbm47	79.4837	1.09052	2.12951	0.306313	3.56015	0.000370638	0.00559843	57.3442	22.3447	49.7071	73.9116	82.2045	83.2512	154.327	112.779	UP
Rbmx	2326.99	-0.736876	0.600037	0.0826155	-8.91934	4.69063e-19	3.43783e-16	2896.39	2860.12	2907.87	2972.89	1650.67	1584.86	2038	1705.14	DOWN
Rcan2	203.707	0.594574	1.51003	0.14209	4.18448	2.85818e-05	0.000775851	131.791	185.558	156.37	175.198	246.614	213.781	251.332	269.014	UP
Rdh14	107.496	0.624716	1.54191	0.165295	3.77939	0.000157212	0.00290265	93.5617	88.4073	70.4184	85.7739	123.855	127.446	128.753	141.75	UP
Rdm1	67.1538	-0.643328	0.640234	0.242249	-2.65565	0.00791564	0.05194	87.5254	77.7207	64.205	98.5487	50.4188	39.0561	73.195	46.5602	DOWN
Rec8	83.6691	-0.699462	0.615802	0.224313	-3.11824	0.00181934	0.0181471	111.67	90.3504	133.588	79.3865	66.8597	53.4452	80.25	53.8029	DOWN
Repin1	351.859	0.602506	1.51835	0.13861	4.34678	1.3815e-05	0.000435437	292.757	280.766	282.709	260.972	403.35	509.785	321	463.533	UP
Retreg1	41.2858	0.941791	1.92091	0.299283	3.14683	0.00165051	0.0170169	26.157	23.3162	37.2803	26.4622	39.4582	79.14	46.739	51.7335	UP
Rffl	96.0384	0.656839	1.57662	0.216972	3.0273	0.00246748	0.0224713	84.5073	87.4358	52.8138	72.9991	104.126	144.919	89.0687	132.438	UP
Rflnb	77.0072	0.714062	1.64042	0.215786	3.30912	0.000935904	0.0111574	61.3684	72.8632	39.3515	59.3117	104.126	84.279	88.1868	106.571	UP
Rgs20	229.995	-0.591685	0.663568	0.136837	-4.32402	1.53212e-05	0.000466614	326.963	285.624	254.749	239.072	194.003	160.336	194.011	185.206	DOWN
Rhbdf2	45.7938	0.78843	1.72719	0.288197	2.73573	0.00622412	0.0438145	37.2235	24.2877	45.5649	27.3747	49.3227	69.8899	42.3297	70.3576	UP
Rhof	28.022	-0.973262	0.509353	0.372997	-2.6093	0.00907282	0.0572382	33.1993	50.5185	32.1025	32.8496	24.1133	7.19455	25.5742	18.6241	DOWN
Rhog	93.3076	1.00639	2.00888	0.193777	5.19358	2.0629e-07	1.33235e-05	67.4046	65.0911	47.636	67.5241	111.798	145.947	107.588	133.473	UP
Riox1	152.576	0.771993	1.70763	0.177733	4.34356	1.40195e-05	0.000440086	137.827	74.8062	113.912	124.098	196.195	188.086	174.61	211.073	UP
Rlbp1	260.537	-0.936676	0.522435	0.149538	-6.26379	3.75735e-10	5.55593e-08	312.878	287.567	430.795	338.533	160.025	160.336	191.365	202.795	DOWN
Rnf112	80.6184	-0.991336	0.503012	0.297859	-3.32821	0.000874055	0.0106382	74.4469	68.0057	184.331	102.199	53.7069	59.612	40.5659	62.0802	DOWN
Rnf113a1	45.3501	0.63638	1.55442	0.244161	2.60639	0.00915023	0.0576403	36.2174	41.7749	32.1025	31.9371	61.3794	54.473	57.3214	47.5949	UP
Rnf213	336.263	0.714622	1.64105	0.130529	5.47482	4.37967e-08	3.56657e-06	276.661	251.621	205.042	284.696	416.503	356.644	425.06	473.879	UP
Rnft2	285.576	-0.675615	0.626065	0.134107	-5.03789	4.70683e-07	2.6896e-05	377.265	354.601	386.266	288.346	204.963	195.281	257.505	220.385	DOWN
Rny1	1882.77	0.751646	1.68371	0.281022	2.67469	0.00747985	0.0499441	1607.65	960.823	2052.49	991.875	2158.14	2696.93	2159.69	2434.58	UP
Robo2	2073.74	-0.617836	0.651648	0.210307	-2.93778	0.00330572	0.0275319	2437.63	2263.62	3531.28	1812.2	1646.28	1659.89	1561.79	1677.2	DOWN
Rorc	71.9205	0.672308	1.59362	0.287671	2.33707	0.0194356	0.0971893	87.5254	46.6324	28.9958	58.3993	84.3966	105.863	65.2582	98.2937	UP
Rpp25l	92.5911	0.9016	1.86814	0.195147	4.62011	3.83543e-06	0.000150816	54.3261	63.1481	56.9561	83.0364	139.2	115.113	105.824	123.126	UP
Rpp38	45.1025	0.757139	1.69014	0.251874	3.00602	0.00264695	0.0235958	37.2235	29.1453	31.067	36.4995	69.0518	46.2507	54.6758	56.9069	UP
Rps4l	175.281	0.672059	1.59335	0.149627	4.49158	7.06983e-06	0.000249845	146.882	156.413	123.232	114.061	226.884	195.281	198.42	241.078	UP
Rpusd2	213.71	0.701465	1.62616	0.149666	4.68688	2.77398e-06	0.000118237	157.948	194.302	126.339	171.548	266.343	261.059	231.049	301.089	UP
Rreb1	349.084	0.623393	1.54049	0.112495	5.54151	2.99881e-08	2.57913e-06	288.733	249.678	246.464	313.896	442.808	393.645	443.58	413.868	UP
Rrp15	290.499	0.656925	1.57672	0.117504	5.59064	2.26235e-08	2.00718e-06	251.51	224.419	191.58	233.597	362.796	367.95	322.764	369.377	UP
Rrs1	566.224	1.01005	2.01399	0.101056	9.99499	1.60301e-23	2.70219e-20	339.035	418.721	363.483	380.508	799.028	799.623	665.81	763.587	UP
Rsph4a	32.4392	1.16578	2.24354	0.34065	3.42221	0.000621146	0.00825833	18.1087	10.6866	24.8536	26.4622	46.0345	31.8616	59.0852	42.4215	UP
Rspo2	214.344	0.752314	1.68449	0.199541	3.77022	0.000163105	0.00298207	147.888	154.47	135.659	200.747	270.727	168.558	350.102	286.604	UP
Rtkn	165.511	1.06497	2.09213	0.19746	5.39335	6.91548e-08	5.27486e-06	100.604	130.182	79.7385	116.799	248.806	272.365	155.209	220.385	UP
Rtl10	34.6388	0.948877	1.93037	0.303511	3.12634	0.00176997	0.0178537	23.1389	32.0598	23.818	15.5123	49.3227	46.2507	35.2747	51.7335	UP
Rtl8c	42.1228	0.888842	1.85169	0.279958	3.17491	0.00149881	0.0158107	25.151	44.6894	22.7824	25.5497	48.2266	59.612	58.2033	52.7682	UP
Rxylt1	195.823	0.614559	1.53109	0.134619	4.56515	4.99129e-06	0.000186559	133.803	161.271	163.619	159.685	240.037	264.143	208.121	235.905	UP
Ryr1	346.93	-1.1635	0.446427	0.154599	-7.52593	5.23458e-14	1.47066e-11	475.857	363.344	635.837	444.382	219.212	198.364	228.404	210.038	DOWN
Ryr3	234.656	-0.92458	0.526834	0.216991	-4.26091	2.03597e-05	0.000591731	244.468	252.592	501.214	231.772	166.601	149.03	176.374	155.201	DOWN
S1pr1	319.726	0.729745	1.65835	0.121995	5.98177	2.20722e-09	2.79663e-07	209.256	249.678	230.931	271.009	455.961	400.839	356.275	383.863	UP
Sac3d1	131.81	0.666348	1.58705	0.181198	3.67745	0.000235579	0.00393184	80.4831	95.2079	101.485	129.573	167.697	162.391	131.398	186.241	UP
Sall2	1221.44	0.687629	1.61063	0.0984847	6.98209	2.90829e-12	6.57917e-10	949.701	1077.4	783.923	930.738	1521.33	1518.05	1372.19	1618.23	UP
Samd3	40.6787	0.928774	1.90366	0.388749	2.38914	0.016888	0.0885477	25.151	34.9743	10.3557	41.062	63.5715	67.8343	25.5742	56.9069	UP
Sardh	42.823	0.963205	1.94964	0.298744	3.22418	0.00126334	0.0138918	29.1751	31.0883	36.2448	20.0747	63.5715	48.3063	75.8406	38.2828	UP
Satb2	857.508	-0.981597	0.506419	0.365406	-2.68632	0.00722448	0.0488109	951.713	797.609	2019.35	785.652	442.808	593.036	720.486	549.41	DOWN
Saysd1	73.325	0.779423	1.71644	0.211497	3.68526	0.000228467	0.00383975	44.2657	71.8917	45.5649	53.8368	101.934	90.4458	85.5412	93.1204	UP
Scara3	183.061	0.615315	1.53189	0.154319	3.9873	6.68283e-05	0.00152233	136.821	183.615	124.268	133.223	222.5	217.892	195.775	250.39	UP
Scg2	23.079	-1.16227	0.44681	0.361935	-3.21126	0.00132154	0.0143909	24.1449	34.9743	31.067	37.412	18.633	12.3335	16.7555	9.31204	DOWN
Schip1	102.81	-0.63837	0.642438	0.208095	-3.06769	0.00215723	0.020395	119.719	118.524	163.619	98.5487	100.838	84.279	63.4945	73.4616	DOWN
Scube3	460.862	0.598662	1.51431	0.102941	5.81556	6.04302e-09	6.65799e-07	355.132	378.889	366.59	364.995	566.663	636.204	493.846	524.578	UP
Selenom	45.0027	0.813079	1.75696	0.260441	3.12193	0.00179671	0.0179876	26.157	41.7749	36.2448	26.4622	51.5148	58.5842	52.0302	67.2536	UP
Selenop	358.014	0.63672	1.55479	0.157135	4.05206	5.07696e-05	0.00123674	238.431	267.165	333.452	282.871	412.119	321.699	545.876	462.498	UP
Sema6a	1325.34	0.634418	1.55231	0.0830179	7.64195	2.13963e-14	6.93612e-12	946.683	1149.3	1083.2	974.538	1672.59	1581.77	1507.11	1687.55	UP
Serpine2	73.8584	0.65999	1.58007	0.222268	2.96934	0.00298442	0.0256283	66.3986	48.5755	70.4184	43.7994	112.894	81.1956	83.7775	83.8083	UP
Serpini1	363.18	-0.667087	0.629777	0.150195	-4.44146	8.93512e-06	0.000305516	384.307	390.547	596.486	412.445	275.111	273.393	322.764	250.39	DOWN
Sesn2	123.638	1.64428	3.12591	0.184143	8.92933	4.28597e-19	3.28403e-16	75.4529	50.5185	48.6716	64.7867	208.251	160.336	177.255	203.83	UP
Sh3gl2	202.673	-0.801177	0.573881	0.194218	-4.12514	3.70505e-05	0.000953903	272.637	231.219	331.381	196.185	131.527	159.308	190.483	108.64	DOWN
Shtn1	435.467	-0.872782	0.546093	0.33565	-2.60027	0.00931498	0.0583293	494.971	409.005	981.716	367.733	331.01	313.477	303.363	282.465	DOWN
Siah2	81.421	0.663439	1.58385	0.189354	3.5037	0.00045884	0.00655971	54.3261	56.3475	67.3117	73.9116	107.414	92.5013	102.297	97.2591	UP
Six3	69.1583	0.816739	1.76142	0.340884	2.39594	0.0165777	0.0873555	45.2718	75.7777	25.8891	52.9243	89.8769	101.751	39.6841	122.091	UP
Six3os1	161.605	0.921939	1.89466	0.225367	4.09083	4.29835e-05	0.00108469	111.67	111.724	97.3431	125.011	313.473	199.392	125.225	209.003	UP
Six4	131.089	0.887653	1.85016	0.175481	5.0584	4.22778e-07	2.44906e-05	89.5375	97.1509	68.3473	112.236	153.448	172.669	158.736	196.587	UP
Slc17a7	310.022	-1.03116	0.489317	0.179756	-5.73643	9.66927e-09	9.81897e-07	385.313	370.145	500.178	411.532	156.737	192.197	295.426	168.651	DOWN
Slc19a2	93.282	1.11446	2.16514	0.248149	4.4911	7.08554e-06	0.000249877	74.4469	33.0313	74.5607	53.8368	126.047	137.724	93.478	153.131	UP
Slc1a1	72.2389	-1.1949	0.436817	0.307143	-3.89037	0.000100092	0.00210907	83.5013	99.094	151.193	69.3491	29.5936	48.3063	67.9038	28.9708	DOWN
Slc24a3	50.1433	0.973934	1.96419	0.263263	3.69947	0.000216052	0.00367878	34.2053	33.0313	34.1736	33.7621	77.8203	85.3068	57.3214	45.5255	UP
Slc25a18	48.7879	0.859932	1.81495	0.269655	3.18901	0.00142763	0.0152627	30.1812	25.2592	49.7071	33.7621	54.803	79.14	62.6126	54.8376	UP
Slc25a24	129.181	0.606734	1.52281	0.222222	2.7303	0.00632759	0.0443326	98.5918	134.068	62.1339	114.061	161.121	178.836	112.879	171.755	UP
Slc27a3	122.64	0.722936	1.65054	0.184743	3.91321	9.10785e-05	0.00194589	90.5435	85.4928	83.8808	109.499	173.178	185.003	125.225	128.299	UP
Slc2a12	28.2515	1.19289	2.28611	0.380494	3.13512	0.00171783	0.0175182	18.1087	14.5726	22.7824	13.6873	32.8818	20.5559	59.967	43.4562	UP
Slc30a10	616.879	-0.616837	0.652099	0.126229	-4.88664	1.0257e-06	5.22365e-05	738.433	651.883	913.368	685.279	446.096	482.035	580.269	437.666	DOWN
Slc35b2	282.909	0.658683	1.57864	0.153692	4.28572	1.82145e-05	0.000534915	211.268	242.877	153.264	269.184	339.779	357.672	315.709	373.516	UP
Slc35e4	56.8725	0.872971	1.83143	0.215641	4.04827	5.15982e-05	0.00125511	35.2114	42.7464	43.4937	39.237	76.7242	71.9455	73.195	72.427	UP
Slc3a1	27.4112	-0.953994	0.516201	0.321333	-2.96886	0.00298907	0.0256551	34.2053	40.8034	35.2092	34.6746	15.3448	13.3613	22.9286	22.7628	DOWN
Slc44a5	263.738	-0.838548	0.559206	0.1681	-4.98839	6.08861e-07	3.3651e-05	343.059	315.741	390.408	305.684	127.143	195.281	244.277	188.31	DOWN
Slc46a1	36.0783	0.815428	1.75982	0.311489	2.61784	0.00884883	0.0562549	18.1087	28.1738	28.9958	29.1996	37.266	38.0283	40.5659	68.2883	UP
Slc4a5	56.9614	0.802854	1.74455	0.345264	2.32534	0.0200539	0.0991344	29.1751	18.4587	70.4184	48.3619	55.8991	70.9177	101.415	61.0456	UP
Slc7a11	157.333	0.714102	1.64046	0.200415	3.56311	0.000366491	0.0055607	141.852	119.496	102.521	113.149	233.461	145.947	252.214	150.027	UP
Slc8b1	28.7766	0.84535	1.7967	0.360485	2.34503	0.0190254	0.0958589	24.1449	25.2592	14.4979	18.2498	56.9951	34.945	34.3928	21.7281	UP
Slfn5	20.8669	0.913992	1.88425	0.360747	2.53361	0.0112894	0.0670327	12.0725	17.4872	16.569	11.8623	29.5936	21.5836	30.8654	26.9014	UP
Slitrk5	462.581	0.989466	1.98545	0.114258	8.65996	4.71925e-18	3.05971e-15	328.975	261.336	321.025	327.583	631.331	629.009	524.711	676.675	UP
Smarca2	1467.73	-0.589721	0.664471	0.150337	-3.92267	8.75738e-05	0.00189541	1663.99	1506.81	2439.79	1445.38	1122.37	1032.93	1428.63	1101.92	DOWN
Smco4	96.8467	0.691686	1.61517	0.181114	3.81907	0.000133957	0.00258661	74.4469	66.0626	78.7029	76.649	122.759	128.474	95.2417	132.438	UP
Smim20	65.9835	-0.677404	0.625289	0.228666	-2.96242	0.00305236	0.0259776	73.4409	98.1224	89.0586	64.7867	38.3621	55.5008	59.967	48.6295	DOWN
Sned1	368.199	0.765925	1.70046	0.199943	3.83072	0.000127768	0.00251024	275.655	328.37	276.496	210.785	538.166	269.282	592.615	454.22	UP
Snhg15	59.151	0.85439	1.80799	0.25943	3.29333	0.000990073	0.01159	45.2718	44.6894	25.8891	52.0118	98.6454	74.0011	58.2033	74.4963	UP
Snn	1289.2	-0.834101	0.560932	0.0871434	-9.57159	1.05272e-21	1.26755e-18	1589.54	1757.46	1720.07	1542.11	936.035	830.457	1045.01	892.921	DOWN
Snora31	48.9911	0.715642	1.64221	0.26715	2.6788	0.00738865	0.0495329	44.2657	36.9174	33.1381	33.7621	86.5888	46.2507	52.0302	58.9762	UP
Snora57	177.423	0.655849	1.57554	0.20875	3.1418	0.00167915	0.0172279	136.821	116.581	208.149	90.3363	189.618	238.448	210.766	228.662	UP
Snord83b	58.0296	0.830546	1.77836	0.255497	3.25071	0.00115117	0.0129628	45.2718	30.1168	50.7427	41.062	55.8991	92.5013	61.7308	86.9123	UP
Snx33	199.985	0.660135	1.58023	0.135158	4.88419	1.03855e-06	5.24157e-05	146.882	151.555	143.944	177.023	229.077	281.615	226.64	243.148	UP
Sorl1	1304.42	-0.715035	0.60919	0.0947284	-7.54826	4.41099e-14	1.282e-11	1531.19	1599.1	1851.59	1504.69	876.848	1080.21	1051.19	940.516	DOWN
Sox5	3259.5	-0.639347	0.642003	0.272885	-2.34292	0.0191335	0.0962384	3725.36	2943.67	6053.91	3158.12	2276.52	2670.21	2918.1	2330.08	DOWN
Sp5	51.3853	1.27981	2.42807	0.308806	4.14437	3.40744e-05	0.00089053	29.1751	28.1738	25.8891	36.4995	83.3006	34.945	75.8406	97.2591	UP
Spin2c	35.5404	0.743794	1.67457	0.286238	2.59851	0.00936284	0.058542	23.1389	22.3447	37.2803	23.7247	39.4582	49.3341	41.4478	47.5949	UP
Spp1	26.945	-1.44233	0.367972	0.570207	-2.52949	0.0114229	0.0675636	101.61	16.5157	25.8891	13.6873	7.67242	20.5559	14.1099	15.5201	DOWN
Spr	165.446	0.730658	1.6594	0.167376	4.36537	1.26908e-05	0.000405936	107.646	164.185	103.557	122.273	191.811	185.003	226.64	222.454	UP
Spry1	210.061	0.672798	1.59416	0.175302	3.83793	0.000124075	0.00246935	167.003	206.931	109.77	163.335	310.185	238.448	235.459	249.356	UP
Spsb2	22.9069	1.24014	2.36222	0.385013	3.22104	0.00127725	0.0139718	9.05435	10.6866	14.4979	20.0747	32.8818	44.1951	29.1016	22.7628	UP
Ssc5d	29.4688	0.783421	1.72121	0.328836	2.38241	0.0171999	0.0896811	19.1147	29.1453	14.4979	23.7247	43.8424	25.6948	41.4478	38.2828	UP
Stab1	420.591	0.632335	1.55007	0.155634	4.06296	4.84553e-05	0.00119943	282.697	341	339.665	356.783	514.052	396.728	687.857	445.943	UP
Stac	28.54	-1.68765	0.310432	0.39274	-4.29712	1.73035e-05	0.000514435	50.302	25.2592	43.4937	55.6618	5.4803	14.3891	20.283	13.4507	DOWN
Steap2	72.6194	0.70198	1.62674	0.251425	2.79201	0.0052382	0.0388304	60.3624	78.6923	38.3159	43.7994	88.7809	111.002	91.7143	68.2883	UP
Stxbp2	134.884	-0.641874	0.64088	0.189123	-3.39395	0.000688932	0.00887191	159.96	145.726	144.979	207.135	115.086	101.751	127.871	76.5656	DOWN
Sulf1	656.88	0.745521	1.67658	0.305144	2.44318	0.0145585	0.0796851	471.832	290.481	532.28	668.854	729.976	593.036	1089.11	879.47	UP
Sulf2	919.269	1.27671	2.42285	0.131096	9.73874	2.06096e-22	2.89513e-19	471.832	584.849	413.19	677.066	1401.86	1187.1	1262.83	1355.42	UP
Suox	54.3588	0.857542	1.81195	0.273486	3.1356	0.00171506	0.0175004	42.2536	31.0883	42.4582	39.237	43.8424	91.4736	85.5412	58.9762	UP
Svep1	79.8416	0.657216	1.57704	0.271604	2.41976	0.0155309	0.0832709	57.3442	90.3504	46.6004	53.8368	99.7415	62.6954	140.217	87.947	UP
Svet1	218.661	-1.24348	0.422352	0.226708	-5.48494	4.13613e-08	3.4345e-06	268.612	242.877	492.929	226.297	98.6454	137.724	150.799	131.403	DOWN
Syn1	269.655	-0.781245	0.581865	0.169537	-4.6081	4.06369e-06	0.000157114	278.673	341.971	474.289	269.184	211.54	191.169	201.066	189.345	DOWN
Syn2	228.6	-0.857892	0.551758	0.186722	-4.59449	4.33805e-06	0.000165071	284.709	301.168	355.199	239.072	140.296	152.113	231.049	125.195	DOWN
Syne1	328.091	0.587763	1.50291	0.152629	3.85092	0.000117673	0.00237274	231.389	226.362	329.31	261.884	466.922	308.338	419.769	380.759	UP
Synpo	110.337	0.604245	1.52018	0.201228	3.00279	0.00267515	0.0237426	75.4529	81.6068	106.663	86.6864	168.793	113.057	149.036	101.398	UP
Syt13	33.812	0.980974	1.9738	0.339371	2.89057	0.00384545	0.030835	23.1389	31.0883	14.4979	21.8997	46.0345	56.5286	25.5742	51.7335	UP
Syt17	23.3095	1.25151	2.3809	0.400059	3.12831	0.00175818	0.0177683	8.04831	15.5441	18.6402	12.7748	47.1306	37.0005	19.4011	27.9361	UP
Sytl5	60.6425	-0.622036	0.649753	0.230617	-2.69727	0.00699103	0.0478084	74.4469	85.4928	55.9205	78.474	39.4582	42.1395	56.4395	52.7682	DOWN
Tacr1	41.9524	1.74701	3.35661	0.276197	6.32522	2.52868e-10	4.02132e-08	20.1208	22.3447	13.4623	20.9872	67.9557	59.612	73.195	57.9416	UP
Taf13	126.334	0.630545	1.54815	0.173593	3.63233	0.000280874	0.00450582	103.622	94.2364	85.9519	112.236	144.68	191.169	128.753	150.027	UP
Tal1	51.9245	0.666878	1.58763	0.284227	2.34629	0.0189614	0.0957554	55.3322	33.0313	20.7113	51.0993	65.7636	67.8343	56.4395	65.1843	UP
Tbcc	204.588	0.616428	1.53307	0.150082	4.10726	4.00383e-05	0.00102107	156.942	139.897	150.157	198.01	289.36	248.726	212.53	241.078	UP
Tcf7	117.352	0.870984	1.82891	0.220802	3.94464	7.99209e-05	0.00176339	74.4469	51.49	115.983	90.3363	144.68	123.335	171.964	166.582	UP
Tcp11l2	54.751	-0.780979	0.581972	0.240416	-3.24845	0.00116034	0.0130399	63.3805	65.0911	83.8808	64.7867	47.1306	38.0283	46.739	28.9708	DOWN
Tekt2	51.7291	-0.734958	0.600835	0.273104	-2.69113	0.00712097	0.0483635	62.3744	75.7777	48.6716	72.0866	27.4015	28.7782	51.1483	47.5949	DOWN
Tenm1	159.043	-0.902786	0.534853	0.236894	-3.81092	0.00013845	0.00265044	207.244	174.872	323.096	124.098	123.855	94.5569	112.879	111.744	DOWN
Tgfbi	102.084	0.828519	1.77586	0.267309	3.09948	0.00193863	0.018879	58.3503	110.752	59.0272	65.6992	188.522	82.2234	115.525	136.577	UP
Tgfbr3l	20.1878	-0.980768	0.50671	0.404367	-2.42544	0.0152899	0.0823194	36.2174	25.2592	18.6402	27.3747	7.67242	17.4725	18.5192	10.3467	DOWN
Tgm7	23.909	6.00366	64.1624	0.886359	6.7734	1.25794e-11	2.55483e-09	0	2.91453	0	0	43.8424	54.473	47.6209	42.4215	UP
Tha1	30.385	0.793538	1.73332	0.334855	2.36979	0.0177981	0.091694	16.0966	33.0313	17.6046	21.8997	51.5148	30.8338	31.7472	40.3522	UP
Thap12	1003.35	0.64932	1.56843	0.079909	8.12574	4.44642e-16	1.97246e-13	744.469	798.581	761.14	819.415	1238.55	1315.57	1108.51	1240.57	UP
Thbd	35.9216	1.09628	2.13803	0.366064	2.99478	0.00274641	0.0240875	32.1933	16.5157	17.6046	25.5497	35.0739	31.8616	82.0137	46.5602	UP
Tiam2	2015.48	-1.17365	0.443298	0.366115	-3.20569	0.0013474	0.0146159	2446.69	1917.76	4756.35	2051.27	934.939	1238.49	1730.22	1048.12	DOWN
Timm8a1	46.7639	0.674237	1.59575	0.262116	2.57228	0.010103	0.0617949	28.1691	46.6324	27.9603	41.062	50.4188	68.8621	52.0302	58.9762	UP
Tll2	27.6415	-0.832705	0.561476	0.331412	-2.51259	0.0119847	0.0695344	35.2114	30.1168	39.3515	36.4995	29.5936	17.4725	13.228	19.6587	DOWN
Tmbim1	41.0404	0.868106	1.82526	0.327369	2.65176	0.00800731	0.0524191	18.1087	22.3447	30.0314	45.6244	52.6109	34.945	68.7857	55.8722	UP
Tmem11	200.915	0.607518	1.52364	0.140061	4.33754	1.44088e-05	0.000447309	139.839	165.157	153.264	177.935	223.596	252.837	214.294	280.396	UP
Tmem132e	30.7621	1.41893	2.67387	0.353965	4.00866	6.1063e-05	0.00142964	10.0604	20.4017	14.4979	21.8997	26.3054	56.5286	46.739	49.6642	UP
Tmem198	81.1973	-0.597809	0.660757	0.244144	-2.44859	0.0143418	0.0789547	86.5194	118.524	127.375	59.3117	55.8991	63.7231	74.0769	64.1496	DOWN
Tmem246	67.5113	0.594341	1.50978	0.222236	2.67437	0.00748703	0.0499441	44.2657	59.2621	64.205	47.4494	71.2439	94.5569	67.022	92.0857	UP
Tmem74	154.762	-0.951106	0.517236	0.272869	-3.48557	0.000491083	0.00692156	184.105	111.724	357.27	163.335	115.086	94.5569	119.934	92.0857	DOWN
Tnc	283.782	-1.29543	0.407415	0.474869	-2.72797	0.00637253	0.0445179	256.54	270.08	851.235	235.422	157.833	145.947	194.893	158.305	DOWN
Tnfaip8	189.119	0.652701	1.57211	0.145228	4.49432	6.97931e-06	0.000247164	150.906	168.071	134.623	134.136	249.902	208.642	202.83	263.841	UP
Tnfrsf10b	43.9538	1.04525	2.06373	0.279696	3.73711	0.000186148	0.00330491	28.1691	32.0598	20.7113	33.7621	41.6503	75.0289	64.3764	55.8722	UP
Tnip2	54.574	0.761299	1.69502	0.24218	3.14352	0.00166928	0.017158	44.2657	34.9743	32.1025	50.1869	84.3966	59.612	61.7308	69.3229	UP
Tor1aip2	975.053	0.679848	1.60197	0.101573	6.69317	2.18387e-11	4.331e-09	823.946	794.695	616.161	761.928	1192.51	1274.46	1072.35	1264.37	UP
Tpst2	109.43	0.674086	1.59559	0.194489	3.46592	0.000528413	0.00730719	72.4348	97.1509	97.3431	70.2616	126.047	160.336	104.942	146.923	UP
Trank1	73.1429	0.790284	1.72941	0.293284	2.6946	0.00704723	0.0480368	29.1751	63.1481	72.4896	49.2744	135.911	84.279	60.8489	90.0164	UP
Trim2	3020.66	-0.75594	0.592161	0.202419	-3.73454	0.00018806	0.00331604	3618.72	3059.28	5195.43	3305.03	1960.85	2313.56	2594.46	2117.97	DOWN
Trim21	22.9163	1.39609	2.63188	0.372074	3.75219	0.000175297	0.00315029	11.0664	13.6011	9.32009	16.4248	26.3054	25.6948	40.5659	40.3522	UP
Trim65	60.7758	0.789659	1.72867	0.250862	3.14779	0.00164512	0.0169925	39.2355	32.0598	62.1339	44.7119	88.7809	89.418	62.6126	67.2536	UP
Trim9	302.87	-0.771651	0.585747	0.210604	-3.664	0.000248307	0.00409962	319.92	287.567	612.019	309.334	211.54	193.225	268.97	220.385	DOWN
Trmt112-ps2	36.8213	-0.754856	0.592606	0.296277	-2.5478	0.0108403	0.0649149	56.3382	43.7179	28.9958	55.6618	27.4015	26.7226	24.6923	31.0401	DOWN
Trmt9b	68.4008	0.586076	1.50116	0.221561	2.64521	0.008164	0.0531559	50.302	39.8319	67.3117	61.1367	84.3966	90.4458	67.9038	85.8777	UP
Ttc39b	322.679	-0.850848	0.554459	0.17929	-4.74566	2.07828e-06	9.36726e-05	398.392	309.911	546.778	406.97	201.675	192.197	305.126	220.385	DOWN
Tuba4a	78.5747	-0.961416	0.513553	0.23051	-4.17082	3.035e-05	0.000815966	98.5918	86.4643	118.054	113.149	46.0345	42.1395	77.6044	46.5602	DOWN
Ubap1l	27.2114	-1.05644	0.480816	0.391772	-2.69657	0.00700573	0.0478282	32.1933	34.0028	24.8536	55.6618	16.4409	11.3057	13.228	30.0055	DOWN
Ubiad1	101.888	0.614336	1.53085	0.211626	2.90293	0.0036969	0.0299609	80.4831	90.3504	68.3473	82.124	166.601	131.557	89.0687	106.571	UP
Unc5d	459.273	-1.09864	0.466955	0.356138	-3.08489	0.0020363	0.0195924	568.412	388.604	1086.31	461.719	253.19	292.921	363.33	259.702	DOWN
Unc80	77.0486	0.672487	1.59382	0.191609	3.50968	0.000448653	0.00645302	67.4046	64.1196	55.9205	50.1869	100.838	96.6125	88.1868	93.1204	UP
Unc93b1	53.0335	0.912994	1.88295	0.239022	3.81971	0.000133608	0.0025858	39.2355	39.8319	28.9958	39.237	60.2833	61.6676	84.6593	70.3576	UP
Uncx	27.6861	1.67936	3.20286	0.526002	3.19269	0.00140955	0.0151343	12.0725	9.71509	3.1067	27.3747	65.7636	54.473	15.8736	33.1095	UP
Uqcc3	104.191	0.598013	1.51363	0.220744	2.70908	0.00674693	0.0465166	75.4529	86.4643	69.3829	99.4612	133.719	159.308	79.3681	130.369	UP
Usp2	43.8077	1.29716	2.45745	0.27311	4.74959	2.0383e-06	9.21169e-05	26.157	21.3732	19.6757	33.7621	58.0912	68.8621	51.1483	71.3923	UP
Usp51	46.3498	1.60329	3.03836	0.265128	6.04724	1.47352e-09	1.97137e-07	21.1268	26.2308	17.6046	26.4622	72.34	69.8899	56.4395	80.7043	UP
Ust	129.333	-0.782624	0.581309	0.223026	-3.50912	0.000449595	0.00646107	149.9	129.211	238.18	137.786	81.1085	72.9733	113.761	111.744	DOWN
Vamp8	33.4217	0.821382	1.7671	0.341147	2.40771	0.0160531	0.0854187	22.1329	18.4587	28.9958	27.3747	30.6897	27.7504	64.3764	47.5949	UP
Vasn	46.6376	0.684041	1.60663	0.25567	2.67548	0.00746217	0.0498572	28.1691	39.8319	28.9958	45.6244	65.7636	59.612	50.2665	54.8376	UP
Vat1l	249.562	0.604801	1.52077	0.214761	2.81615	0.00486026	0.0367231	194.166	129.211	253.713	215.347	288.264	190.142	356.275	369.377	UP
Vsir	31.9955	0.836214	1.78536	0.314697	2.6572	0.00787916	0.0517611	30.1812	19.4302	20.7113	21.8997	28.4976	43.1673	53.7939	38.2828	UP
Vstm2b	81.4436	0.694232	1.61802	0.224034	3.09878	0.00194322	0.0189127	65.3926	85.4928	56.9561	41.062	100.838	105.863	87.3049	108.64	UP
Vtn	251.124	0.614321	1.53084	0.182768	3.3612	0.000776046	0.00970069	180.081	221.504	205.042	187.973	309.089	217.892	427.706	259.702	UP
Wdfy4	20.3098	0.944318	1.92428	0.388085	2.43328	0.0149628	0.0811546	9.05435	17.4872	13.4623	15.5123	25.2094	17.4725	29.1016	35.1788	UP
Wdr6	1675.91	0.616222	1.53286	0.0793635	7.76455	8.19378e-15	2.76245e-12	1167.01	1406.75	1366.95	1351.4	2083.61	2062.78	1864.27	2104.52	UP
Wdr91	233.638	0.588275	1.50345	0.126745	4.64142	3.46028e-06	0.000140554	193.16	215.675	179.153	158.773	294.84	286.754	276.907	263.841	UP
Wfikkn2	88.9128	0.617864	1.5346	0.225895	2.73518	0.00623468	0.0438639	63.3805	55.376	84.9163	77.5615	89.8769	84.279	147.272	108.64	UP
Wls	288.045	0.614847	1.5314	0.15447	3.98036	6.88103e-05	0.00155905	215.292	202.074	228.86	264.622	336.49	276.476	451.516	329.025	UP
Wnt7b	892.821	-0.775198	0.584309	0.125198	-6.19179	5.94839e-10	8.42622e-08	985.918	1095.86	1399.05	1029.29	546.934	650.593	759.288	675.64	DOWN
Wtap	1071.24	0.610671	1.52697	0.0783284	7.79628	6.37582e-15	2.23911e-12	816.904	852.985	861.59	858.652	1303.22	1345.38	1156.13	1375.08	UP
Xrcc5	343.918	-0.593059	0.662936	0.105333	-5.63033	1.79868e-08	1.65685e-06	417.506	379.86	420.439	437.082	267.439	296.004	285.725	247.286	DOWN
Ythdf2	1428.75	0.623475	1.54058	0.0739006	8.43667	3.26508e-17	1.83465e-14	1101.61	1091	1195.04	1110.5	1784.39	1770.89	1567.96	1808.6	UP
Zbbx	24.1149	1.13256	2.19247	0.374543	3.02384	0.00249588	0.0226321	8.04831	16.5157	17.6046	18.2498	33.9779	20.5559	39.6841	38.2828	UP
Zbtb1	676.447	0.837586	1.78706	0.0921778	9.08663	1.02153e-19	9.06309e-17	532.195	457.581	447.364	503.694	860.407	938.375	794.563	877.401	UP
Zbtb21	439.951	0.623522	1.54063	0.131861	4.72864	2.26028e-06	0.000100532	342.053	349.743	314.812	377.77	474.594	632.093	429.47	599.074	UP
Zbtb42	28.5572	1.06891	2.09785	0.362095	2.95202	0.00315705	0.0266092	15.0906	20.4017	12.4268	25.5497	44.9385	21.5836	38.8022	49.6642	UP
Zbtb46	183.939	0.80464	1.74671	0.134864	5.9663	2.42688e-09	3.00808e-07	117.707	142.812	129.446	145.086	258.67	217.892	223.994	235.905	UP
Zbtb7b	36.8967	1.25133	2.38061	0.324401	3.85737	0.000114614	0.00233621	28.1691	22.3447	20.7113	16.4248	35.0739	39.0561	66.1401	67.2536	UP
Zc3h12b	108.385	0.651278	1.57056	0.163318	3.9878	6.66898e-05	0.00152123	82.4952	80.6353	78.7029	94.8988	146.872	130.53	122.58	130.369	UP
Zc3hav1	38.0654	0.791418	1.73077	0.339202	2.33317	0.019639	0.0977429	21.1268	40.8034	17.6046	31.9371	55.8991	33.9172	67.022	36.2135	UP
Zcchc24	386.817	1.34385	2.53828	0.105704	12.7134	4.98157e-37	4.19872e-33	196.178	222.476	243.358	212.61	601.737	521.091	541.467	555.618	UP
Zcchc3	447.944	0.724364	1.65217	0.150433	4.8152	1.4705e-06	6.92407e-05	320.927	407.062	251.642	370.47	523.917	588.925	459.453	661.155	UP
Zcwpw1	75.6312	-0.587168	0.665648	0.211015	-2.78259	0.00539269	0.0396271	101.61	75.7777	86.9875	98.5487	77.8203	47.2785	59.0852	57.9416	DOWN
Zfand4	173.731	0.827983	1.7752	0.170978	4.84263	1.28135e-06	6.24269e-05	153.924	118.524	135.659	93.0738	204.963	247.698	188.72	247.286	UP
Zfhx2os	235.703	-0.767852	0.587291	0.128013	-5.99826	1.99449e-09	2.56649e-07	273.643	291.453	343.808	280.134	155.641	174.725	191.365	174.859	DOWN
Zfhx3	864.323	0.745197	1.6762	0.251665	2.96107	0.00306569	0.0260344	587.527	912.247	471.182	612.28	1284.58	1187.1	798.09	1061.57	UP
Zfp114	67.3971	-0.591803	0.663513	0.216979	-2.72746	0.00638239	0.0445683	81.4892	76.7492	69.3829	96.7238	53.7069	53.4452	65.2582	42.4215	DOWN
Zfp365	54.6685	1.25025	2.37882	0.249063	5.0198	5.17241e-07	2.9161e-05	43.2597	27.2023	27.9603	31.0246	65.7636	93.5291	67.9038	80.7043	UP
Zfp442	83.5349	0.864045	1.82013	0.198385	4.35539	1.32831e-05	0.000422478	69.4167	66.0626	45.5649	55.6618	108.51	102.779	96.1236	124.16	UP
Zfp503	105.438	0.634376	1.55227	0.185665	3.41679	0.000633647	0.008371	69.4167	102.008	78.7029	80.299	145.776	103.807	139.335	124.16	UP
Zfp607a	92.1431	0.638091	1.55627	0.197709	3.22742	0.0012491	0.0137711	79.4771	67.0341	70.4184	71.1741	99.7415	121.28	87.3049	140.715	UP
Zfp661	87.9591	-0.708599	0.611914	0.18467	-3.83712	0.000124488	0.00247358	121.731	102.98	103.557	108.586	56.9951	60.6398	70.5494	78.635	DOWN
Zfp784	37.3012	-0.882818	0.542307	0.285985	-3.08694	0.00202227	0.0194912	44.2657	45.6609	65.2406	38.3245	28.4976	23.6392	23.8104	28.9708	DOWN
Zfp830	222.972	0.599936	1.51565	0.125335	4.78667	1.69574e-06	7.7677e-05	191.147	146.698	182.259	188.885	275.111	257.976	265.442	276.257	UP
Zfp951	31.5361	0.818548	1.76363	0.312634	2.61823	0.00883862	0.0562448	20.1208	23.3162	15.5335	31.9371	41.6503	34.945	36.1566	48.6295	UP
Zfp974	220.132	0.628843	1.54632	0.126126	4.98584	6.16942e-07	3.38755e-05	179.075	174.872	165.69	171.548	267.439	308.338	241.632	252.46	UP
Zfp982	24.9806	0.885805	1.8478	0.372499	2.378	0.0174066	0.0903954	17.1027	18.4587	12.4268	21.8997	44.9385	39.0561	27.3379	18.6241	UP
Zfp991	49.1831	0.635654	1.55364	0.252588	2.51657	0.0118504	0.0691695	37.2235	29.1453	44.5293	42.887	66.8597	67.8343	44.9753	60.0109	UP
Zfp992	55.1986	0.716155	1.6428	0.231759	3.09008	0.00200102	0.0193413	50.302	33.0313	36.2448	47.4494	71.2439	59.612	72.3132	71.3923	UP
Zkscan17	657.227	0.591321	1.50663	0.102397	5.7748	7.70449e-09	8.11716e-07	481.893	569.304	466.004	579.43	715.727	846.901	758.406	840.153	UP
Zmat3	940.888	0.769899	1.70515	0.100915	7.62916	2.36289e-14	7.37616e-12	675.052	710.173	685.544	710.828	1098.25	1353.6	1004.45	1289.2	UP
Zmiz1os1	33.0829	-1.09839	0.467036	0.343506	-3.19759	0.00138579	0.0149171	45.2718	28.1738	67.3117	40.1495	17.537	19.5281	29.1016	17.5894	DOWN
Znhit2	113.885	0.615576	1.53217	0.172609	3.56631	0.000362046	0.0055131	90.5435	83.5498	83.8808	101.286	165.505	141.835	129.635	114.848	UP
Zswim1	141.89	0.813122	1.75701	0.148367	5.48049	4.24161e-08	3.48785e-06	91.5496	94.2364	119.09	106.761	184.138	189.114	170.201	180.033	UP
Zxdb	52.807	0.697679	1.62189	0.238846	2.92104	0.0034887	0.0287715	36.2174	34.0028	50.7427	40.1495	61.3794	66.8065	55.5577	77.6003	UP

## Sheet: DEGs with Hypo-m6A peaks 
Hypo-m6A & RNA-UP(219)	Hypo-m6A & RNA-DOWN (39)
Row.names	Row.names
Fam171a1	AI849053
Wdr6	Kcnh7
Cxxc4	Kcng1
Paqr4	Cttnbp2
Rpp25l	Cnr1
Has3	Atp2b2
Pcdhb21	1500004A13Rik
Grwd1	Nrg1
Mob3b	Alpk1
Ddias	Hist3h2a
Ankrd40	Kif21b
Lrrn2	Etl4
Cacna1g	Kcnn3
Zfp992	Dscam
Zcchc24	Kif26b
Aunip	Satb2
Rhog	Gm11266
Sac3d1	L1cam
Gm7324	Neurod1
Gm10033	Trim2
Zfp974	Ipcef1
Rrp15	Ubap1l
Kbtbd8	Gria2
Kcnb1	Unc5d
D1Ertd622e	Kcnh3
Mrpl46	Zfp784
Fem1c	Dubr
AW209491	Lrfn5
Gja1	9330162G02Rik
Rdh14	Adamts18
Mafa	Nfix
Mad2l1bp	Dpf3
Retreg1	Fam135b
Scara3	Plxna2
Slc35e4	Wnt7b
BC034090	Lrrc55
Antxr2	Disp3
Rpusd2	Rbm20
Gspt2	Ocel1
Pcdhb19
Fam210a
BC067074
Nfe2l2
Gpn2
Gm13241
Mavs
Pcdhb20
Prelp
Il20rb
Rnf113a1
Gemin7
Lrfn3
S1pr1
Nfkbiz
Rtl10
Pgp
Minpp1
Plpp2
Mrm3
Gm11620
D10Wsu102e
Tpst2
Metrn
Kat14
Alyref2
Pop7
Pramef8
Dtx4
Zc3h12b
Pus1
Larp6
Nectin1
Pcdhb6
Arxes1
Zbtb42
Nceh1
Ikbip
Nim1k
Bag2
Dusp7
Rbm15
Gm14443
Tbcc
AC122898.1
Slc35b2
Rxylt1
Zcchc3
Wtap
Lsm10
Wdr91
Bbc3
Dyrk3
Ddit4l
Syt13
Med18
C130026L21Rik
Tacr1
Sall2
Col27a1
Phlda3
Usp51
Pcdhb8
Steap2
Clp1
Hyi
Nanos1
Snx33
Zbtb46
Timm8a1
Gpatch4
Parp8
Tor1aip2
Thap12
Ddx28
Dnhd1
Ubiad1
Fbll1
Rara
Lrrfip1
Pck2
Lipt1
Pcdhb18
Gpr63
Ckap4
Mis12
Mrpl16
Brf2
Klf15
Crb1
Orai3
Rasl11a
Sema6a
Mfsd5
Lrfn2
Perm1
Prr7
Dlgap3
Suox
Mrm2
Rrs1
Aen
Lcmt2
Repin1
Jade2
Znhit2
Zfp442
Slitrk5
Fam217b
Zbtb21
Rpp38
Scube3
Spin2c
Pex26
E130308A19Rik
Saysd1
Usp2
Zfp607a
Cnp
Riox1
Phax
Nsmce3
Itpripl1
Zfp991
Mrpl43
Fancf
Pdpn
Zfand4
Chrna3
Tmem11
Gemin6
Arf6
Trim21
Cgrrf1
Cspg4
Tmem246
Pcdhb7
Kcnj14
Glt1d1
Inka2
Ndufaf1
Ndufaf4
Cdkn2d
Mapk12
Zfp830
Cln5
Gm13146
Sesn2
Ythdf2
Rps4l
Kif27
1700017B05Rik
Fam173a
Pth1r
Uqcc3
Zbtb1
Nck1
Klhl21
Six4
Slc2a12
Bag5
Nxt1
Spr
Tnfaip8
Zkscan17
Ankrd9
Zswim1
Gna13
Cdr2
Atoh8
Pcdhb22
Pcdhb16
Rffl
Dsel
Siah2
Pcdhb17
Ccdc51
Lurap1
1110012L19Rik
Mrps2
